# Supplementary material for: High-resolution spatiotemporal transcriptome mapping of tomato fruit development and ripening
Source: PubMed Central journal article supplement (PMC5785480; doi:10.1038/s41467-017-02782-9), 2018-01-25
Supplement: 41467_2017_2782_MOESM2_ESM.pdf [file 41467_2017_2782_MOESM2_ESM.pdf]

## **Descriptions of Additional Supplementary Files**

File Name: Supplementary Data 1

Description: Summary of RNA-Seq mapping for hand-dissected samples.

File Name: Supplementary Data 2

Description: Summary of RNA-Seq mapping for LM samples.

File Name: Supplementary Data 3

Description: Gene expression in fruit tissue/cell-types.

File Name: Supplementary Data 4

Description: Standard errors of gene expression in fruit tissue/cell-types.

File Name: Supplementary Data 5

Description: Reproducibility of RNA-Seq reads for hand-dissected samples.

File Name: Supplementary Data 6

Description: Reproducibility of RNA-Seq reads for LM samples.

File Name: Supplementary Data 7

Description: Module assignment and ME-based gene connectivity for the 12,662 genes selected for WGCNA.

File Name: Supplementary Data 8

Description: Gene ontology enrichment in co-expression WGCNA modules.

File Name: Supplementary Data 9

Description: Hub genes in co-expression WGCNA modules.

File Name: Supplementary Data 10

Description: Down-regulated genes in *SIGRAS38*-RNAi lines.

File Name: Supplementary Data 11

Description: Differentially expressed genes in the tissues among latitudinal fruit sections.
