# Supplementary material for: High-resolution spatiotemporal transcriptome mapping of tomato fruit development and ripening
Source: Nat Commun. 2018 Jan 25;9:364. doi: 10.1038/s41467-017-02782-9 (PMC5785480; doi:10.1038/s41467-017-02782-9)
Supplement: Supplementary file 6 — Supplementary Data 3 [file 41467_2017_2782_MOESM6_ESM.xlsx]

## Sheet: Supplementary Data 3
			Supplementary Data 3. Gene expression in fruit tissue/cell-types.
Gene	Max aveRPM among all samples	Expressed (Max aveRPM ≥ 1)	Averaged RPM (aveRPM) in fruit major six tissues among biological replicates (n = 3 for * and 4 for others)
			Total pericarp Anthesis*	Total pericarp 5 DPA	Total pericarp 10 DPA	Total pericarp 20 DPA	Total pericarp 30 DPA	Total pericarp MG-stem	Total pericarp MG-equatorial	Total pericarp MG-stylar	Total pericarp Br-stem	Total pericarp Br-equatorial	Total pericarp Br-stylar	Total pericarp Pk-stem	Total pericarp Pk-equatorial	Total pericarp Pk-stylar	Total pericarp LR	Total pericarp RR	Septum Anthesis*	Septum 5 DPA	Septum 10 DPA	Septum 20 DPA	Septum 30 DPA	Septum MG-stem	Septum MG-equatorial	Septum MG-stylar	Septum Br-stem	Septum Br-equatorial	Septum Br-stylar	Septum Pk-stem	Septum Pk-equatorial	Septum Pk-stylar	Septum LR	Septum RR	Locular tissue Anthesis*	Locular tissue 5 DPA*	Locular tissue 10 DPA	Locular tissue 20 DPA	Locular tissue 30 DPA	Locular tissue MG-stem	Locular tissue MG-equatorial	Locular tissue MG-stylar	Locular tissue Br-Stem	Locular tissue Br-equatorial	Locular tissue Br-stylar	Locular tissue Pk-stem	Locular tissue Pk-equatorial	Locular tissue Pk-stylar	Locular tissue LR
Solyc00g005000	66.0925	Expressed	0	0	0	0	0.0575	0.54	0.265	0.3	0.18	0.09	0.0775	0.0225	0.045	0	0	0	0	0	0	0.055	0.13	0.97	1.47	0.6325	0.255	0.135	0.1375	0.0225	0.0325	0.0275	0	0.025	0	0	0	0	0.325	0.7725	0.8725	0.425	0	0	0.03	0	0	0.025	0
Solyc00g005020	0.3525		0	0	0	0	0	0	0.0225	0	0	0	0	0	0.0225	0	0	0	0	0	0	0	0	0	0	0	0	0	0	0	0	0	0	0	0	0	0.0675	0.0525	0.0325	0.0425	0.0275	0.06	0.05	0	0.03	0.075	0	0.0275	0.105
Solyc00g005040	11.7425	Expressed	1.71667	2.7275	1.8975	6.98	7.4575	5.835	5.3675	7.5775	9.02	10.3175	10.41	5.9825	5.1375	5.4775	5.4575	6.035	1.21	3.2825	2.19	3.76	5.9125	4.6025	4.79	5.6	6.1	5.605	7.1025	5.9125	4.2875	5.595	4.185	5.8725	0.0933333	0.0666667	2.165	3.6975	3.6625	7.355	6.0875	7.0725	5.115	4.4875	5.4275	4.52	5.71	4.5075	6.815
Solyc00g005050	88.08	Expressed	11.2633	64.47	60.2225	82.225	79.4275	62.11	63.29	70.3975	67.2425	68.9975	74.4375	68.5525	65.18	66.23	78	84.265	11.9333	57.1825	53.7425	58.4575	58.7325	58.1175	53.605	56.7675	65.18	61.535	65.6825	75.05	66.97	74.9775	64.5375	83.955	9.70333	12.7133	58.7525	71.615	62.55	61.365	58.65	55.575	59.66	56.1525	57.5425	63.9	62.97	57.9075	69
Solyc00g005060	0		0	0	0	0	0	0	0	0	0	0	0	0	0	0	0	0	0	0	0	0	0	0	0	0	0	0	0	0	0	0	0	0	0	0	0	0	0	0	0	0	0	0	0	0	0	0	0
Solyc00g005070	0.225		0	0	0	0	0	0	0	0	0	0	0	0	0	0.0275	0	0	0	0	0	0	0	0	0	0	0	0	0	0	0	0	0	0	0	0	0	0	0	0	0	0	0	0	0.025	0	0	0	0
Solyc00g005080	10.3775	Expressed	0	0.0875	0	0.1475	0	0.03	0	0.03	0	0.0325	0.0275	0	0.03	0.035	0	0.0225	0	0.5575	0.06	0.025	0.025	0.0625	0	0	0.0975	0	0.0325	0.0225	0	0	0	0	0	0	0.1175	0.0725	0.0675	0.0925	0.045	0.085	0.05	0	0.025	0.02	0.0675	0.0225	0.0225
Solyc00g005090	0.0275		0	0	0	0	0	0	0	0	0	0	0	0	0	0	0	0	0	0	0	0	0	0	0	0	0	0	0	0	0	0	0	0	0	0	0	0	0	0	0	0	0	0	0	0	0	0	0
Solyc00g005100	0.0225		0	0	0	0.0225	0	0	0	0	0	0	0	0	0	0	0	0	0	0	0	0	0	0	0	0	0	0	0	0	0	0	0	0	0	0	0	0	0	0	0	0	0	0	0	0	0	0	0
Solyc00g005110	0.135		0	0	0	0	0	0	0	0	0	0	0	0	0	0	0	0	0	0	0	0	0	0	0	0	0	0	0	0	0	0	0	0	0	0	0.05	0	0	0	0	0	0	0	0	0	0	0	0
Solyc00g005120	0.795		0	0	0	0.045	0	0.045	0.07	0.1975	0.0275	0.025	0.05	0	0	0	0.03	0.06	0	0	0	0.11	0.07	0.215	0.18	0.2975	0.12	0.1025	0.115	0.0225	0.02	0	0.0275	0.175	0	0	0	0.0775	0.095	0.0625	0.0275	0.11	0.0475	0.0875	0.025	0.065	0.125	0.0275	0.0375
Solyc00g005130	0.38		0	0	0	0	0.025	0	0.12	0.1775	0.0525	0	0.06	0	0.0225	0	0	0.0575	0	0	0	0.025	0.0275	0.0925	0.155	0.0825	0	0	0	0.045	0.02	0	0	0.0225	0	0	0	0	0	0	0.0575	0.06	0	0.0625	0.0275	0.0425	0.1025	0.025	0.055
Solyc00g005140	0.66		0	0	0	0.025	0.065	0	0.08	0.085	0.0275	0.065	0.09	0	0.0225	0	0.05	0.13	0	0	0	0.0525	0	0.155	0.235	0.1325	0	0.065	0.0575	0.0875	0.1625	0.0475	0.0725	0.1875	0	0	0	0	0	0.0475	0.0575	0.02	0.03	0.66	0.0525	0.3	0.3225	0.445	0.3975
Solyc00g005150	0.465		0.04	0.235	0.145	0.1025	0.18	0.0225	0.0575	0.0325	0.055	0.1275	0.1325	0.0225	0.03	0.05	0.11	0.18	0	0.1475	0.08	0.185	0.105	0.0625	0	0.15	0.085	0.0825	0.105	0.045	0.1375	0.02	0	0.1175	0	0	0.17	0.1575	0.13	0.0875	0.25	0.0525	0.0475	0.26	0.025	0.085	0.0275	0	0.06
Solyc00g005160	0.0325		0	0	0	0	0.025	0	0	0	0	0	0	0	0	0	0	0	0	0	0	0	0	0	0	0	0	0	0	0	0	0	0	0	0	0	0	0	0	0	0	0	0	0	0	0	0	0	0
Solyc00g005170	0.0775		0	0	0	0	0	0	0	0	0	0	0	0	0	0	0	0	0	0	0	0.025	0	0	0	0	0	0	0	0	0	0	0	0	0	0	0	0	0	0	0	0	0	0	0	0	0	0	0
Solyc00g005180	0.28		0	0	0	0	0	0	0	0	0	0	0	0	0	0	0	0	0	0	0.0325	0	0	0	0	0	0	0	0	0.0225	0	0	0.09	0	0	0	0.0675	0.0275	0	0	0	0	0	0	0	0	0	0	0
Solyc00g005280	0.0425		0	0	0	0	0	0	0	0	0	0	0	0	0	0	0	0	0	0	0	0	0	0	0.0275	0	0	0	0	0	0	0	0	0	0	0	0	0	0	0	0	0.0425	0	0	0	0.0225	0	0.025	0
Solyc00g005420	0.0175		0	0	0	0	0	0	0	0	0	0	0	0	0	0	0	0	0	0	0	0	0	0	0	0	0	0	0	0	0	0	0	0	0	0	0	0	0	0	0	0	0	0	0	0	0	0	0
Solyc00g005430	20.21	Expressed	0	0.0975	0.2875	0.675	1.085	0.6475	1.01	1.075	0.355	0.2275	0.57	0.1425	0.1525	0.1425	0.1775	0.0575	0	0.02	0.4575	1.4125	1.4375	1.0625	1.68	2.88	0.3625	0.7	1.3375	0	0.0275	0.055	0	0.0125	0	0	1.34	14.4125	20.21	7.405	7.65	15.7275	0.6	0.9775	0.5375	0.075	0.055	0.0675	0
Solyc00g005440	2.4575	Expressed	0.0766667	1.165	1.415	0.815	0.29	0.12	0.0875	0.095	0.055	0.0875	0.48	0.07	0.1825	0.145	0.055	0.31	0.1	0.4825	1.68	0.335	0.05	0.15	0.49	0.0625	0.07	0.0975	0.12	0.0425	0.06	0.0975	0.0575	0.0125	0.106667	0.786667	1	0.51	0.13	0.135	0.21	0.1375	0.185	0.725	0.05	0.225	0.0675	0.16	0.0625
Solyc00g005450	0.025		0	0	0	0	0	0	0	0	0	0	0	0	0	0	0	0	0	0	0	0	0	0	0	0	0	0	0	0	0	0	0	0	0	0	0	0	0	0	0	0	0	0	0	0	0	0	0
Solyc00g005460	0.03		0	0	0	0	0	0	0	0	0	0	0	0	0	0	0	0	0	0	0	0	0	0	0	0	0	0	0	0	0	0	0	0	0	0	0	0	0	0	0	0	0	0	0	0	0	0	0
Solyc00g005470	0.03		0	0	0	0	0	0	0	0	0	0	0	0	0	0	0	0	0	0	0	0	0	0	0	0	0	0	0	0	0	0	0	0	0	0	0	0	0	0	0	0	0	0	0	0	0	0	0
Solyc00g005480	0.02		0	0	0	0	0	0	0	0	0	0	0	0	0	0	0	0	0	0	0	0	0	0	0	0	0	0	0.02	0	0	0	0	0	0	0	0	0	0	0	0	0	0	0	0	0	0	0	0
Solyc00g005490	0.4125		0	0	0	0	0	0	0	0	0	0	0	0	0	0	0	0	0	0	0	0	0	0	0	0	0	0	0	0	0	0	0	0	0	0	0	0.0575	0	0	0.025	0	0	0	0.03	0	0	0	0
Solyc00g005840	54.8667	Expressed	20.4633	45.0325	36.4475	34.6	34.495	41.7225	34.335	35.2525	25.6375	25.79	25.2025	17.295	11.28	11.665	8.9325	7.555	21.6133	39.1225	22.7725	15.8875	13.93	19.8775	12.3725	19.6375	15.685	11.775	14.52	6.3775	5.815	8.005	7.41	6.4025	10.86	29.0233	25.0125	17.845	20.4325	12.5225	14.22	13.9125	4.605	4.13	4.7325	2.3125	2.455	2.8425	3.395
Solyc00g005850	0.5175		0	0	0.025	0.195	0.18	0.27	0.2	0.3275	0.265	0.38	0.25	0.335	0.28	0.5175	0.2275	0.1575	0	0.0325	0.075	0.2325	0.295	0.4175	0.3675	0.27	0.2675	0.155	0.2175	0.325	0.0325	0.1725	0.1525	0	0	0	0.0425	0.13	0.39	0.495	0.395	0.35	0.2275	0.225	0.105	0.0425	0.07	0.0925	0.0975
Solyc00g005860	0.233333		0.04	0.13	0.05	0.075	0.0275	0.0225	0.0225	0.0275	0	0.09	0.0225	0	0	0.0225	0	0	0.233333	0	0	0.0525	0	0.03	0.13	0.0325	0.0575	0.03	0.035	0.0425	0.02	0	0	0.075	0	0	0.0375	0.0225	0	0.0225	0.0525	0.0275	0	0	0	0	0.0275	0.0275	0
Solyc00g005870	0.2025		0	0	0.0525	0	0	0	0	0	0	0	0.08	0	0	0.0275	0	0	0.03	0	0.0275	0.0525	0.0575	0	0	0	0.025	0	0.0425	0	0	0	0	0	0.0866667	0	0.0625	0	0	0.0425	0.0975	0.0225	0	0	0.025	0.0225	0	0	0.0225
Solyc00g005880	0.0775		0	0	0	0.025	0.0325	0	0	0.0275	0	0	0	0.0225	0.0225	0	0	0.0575	0	0	0.0275	0.025	0	0	0	0	0	0	0	0	0	0	0.03	0	0	0	0	0	0.0325	0.0675	0	0.02	0	0	0.03	0	0	0	0.0475
Solyc00g005890	2.83667	Expressed	0	0.045	0	0	0	0	0	0	0	0	0	0	0	0	0	0	0	0.0225	0	0	0	0	0	0	0	0	0	0	0	0	0	0	0.0533333	0.36	0.025	0	0.0325	0	0	0	0	0	0	0	0	0	0
Solyc00g005900	0.0525		0	0	0	0	0	0	0	0	0	0	0	0	0	0	0	0	0	0	0	0	0	0	0	0	0	0	0	0	0	0	0	0	0	0	0	0	0	0	0	0	0	0	0	0	0	0	0
Solyc00g005980	0.055		0	0	0	0	0	0	0	0	0	0	0	0	0	0	0	0	0	0	0	0	0	0	0	0	0	0	0	0	0	0	0	0	0	0	0	0	0	0	0	0	0	0	0	0	0	0	0
Solyc00g006010	0.0325		0	0	0	0	0	0	0	0	0	0	0	0	0	0	0	0	0	0	0	0	0	0	0	0	0	0	0	0	0	0	0	0	0	0	0	0	0	0	0	0	0	0	0	0	0	0	0
Solyc00g006020	0.055		0	0	0	0	0	0	0	0	0	0	0	0	0	0	0	0	0	0	0	0	0	0	0	0	0	0	0	0	0	0	0	0	0	0	0	0	0	0	0	0	0	0	0	0	0	0	0
Solyc00g006050	0.0475		0	0	0	0	0	0	0	0	0	0	0	0	0	0	0	0	0	0	0	0	0	0	0.0325	0	0	0	0	0	0	0	0	0	0	0	0	0	0	0	0.0225	0	0	0	0	0	0	0	0.0225
Solyc00g006090	0.035		0	0	0	0	0	0	0	0	0	0	0	0	0	0	0	0	0	0	0	0	0	0	0	0	0	0	0	0	0	0	0	0	0	0	0	0	0	0	0.0275	0	0	0	0	0	0.035	0	0
Solyc00g006170	0.02		0	0	0	0	0	0	0	0	0	0	0	0	0	0	0	0	0	0	0	0	0	0	0	0	0	0	0	0	0	0	0	0	0	0	0	0	0	0	0	0	0	0	0	0	0	0	0
Solyc00g006250	0.0275		0	0	0	0	0	0	0	0	0	0	0	0	0	0	0	0	0	0	0	0	0	0	0	0	0	0	0	0	0	0	0	0	0	0	0	0	0	0	0	0	0.0275	0	0	0	0	0	0
Solyc00g006470	10.1	Expressed	0.0633333	0.6275	0.07	0.2575	0.11	0.14	0.15	0.055	0.19	0.175	0.1025	0.045	0.205	0.08	0.1225	0.12	0.0633333	1.0125	0.095	0.1275	0.0225	0	0.185	0	0	0.0525	0.02	0	0.145	0.0425	0.0275	0.0875	0.373333	0.146667	1.7875	1.0775	0.1925	0.13	0	0.15	0.0525	0.175	0.115	0.225	0.1875	0.12	0.105
Solyc00g006480	0.03		0	0	0	0	0	0	0	0	0	0	0	0	0	0	0	0	0	0	0	0	0	0	0	0	0	0	0	0	0	0	0	0	0	0	0	0	0	0	0	0	0	0	0	0	0	0	0
Solyc00g006490	63.5575	Expressed	13.3233	18.2075	21.27	24.625	39.515	40.115	41.2375	41.045	43.4925	42.7125	41.515	37.9425	41.61	39.82	34.62	40.7075	15.0133	19.2075	18.5625	30.2375	31.945	36.8975	27.855	39.9475	40.3725	38.24	40.54	35.65	37.3325	35.6225	35.79	47.1975	4.22667	2.67	22.5125	32.8425	29.235	34.8325	42.605	32.9975	33.17	33.645	35.0875	40.0725	38.0525	33.2325	40.6175
Solyc00g006500	0.0225		0	0	0	0	0	0	0	0	0	0	0	0	0	0	0	0	0	0	0	0	0	0	0	0	0	0	0	0	0	0	0	0	0	0	0	0	0	0	0	0	0	0	0	0	0	0	0
Solyc00g006510	0.085		0	0	0	0	0	0	0	0	0	0	0	0	0	0	0	0	0	0	0	0	0	0	0	0	0	0	0	0	0	0	0	0	0	0	0	0	0	0	0	0	0	0	0.03	0	0	0	0
Solyc00g006520	0.085		0	0	0	0	0	0	0	0	0	0	0	0	0	0	0	0	0	0	0	0	0	0	0	0	0	0	0	0	0	0	0	0	0	0	0	0	0	0	0	0	0	0	0.03	0	0	0	0
Solyc00g006530	0.0675		0	0	0	0	0	0	0	0	0	0	0	0	0	0	0	0	0	0	0	0	0	0	0	0	0	0	0	0	0	0	0	0	0	0	0	0	0	0	0	0	0	0	0	0	0	0	0
Solyc00g006540	0.21		0	0	0	0	0	0	0	0	0	0	0	0	0	0	0	0	0	0	0	0.025	0.0325	0	0	0	0	0	0	0	0	0	0	0	0	0	0.08	0.0275	0	0	0.0225	0	0	0	0	0	0	0	0
Solyc00g006550	0.236667		0	0	0	0	0	0	0	0	0	0	0	0	0	0	0	0	0	0	0	0	0	0	0	0	0	0	0	0	0	0	0	0	0	0	0	0	0	0	0	0	0	0	0	0	0	0	0
Solyc00g006560	0.236667		0	0	0	0	0	0	0	0	0	0	0	0	0	0	0	0	0	0	0	0	0	0	0	0	0	0	0	0	0	0	0	0	0	0	0	0	0	0	0	0	0	0	0	0	0	0	0
Solyc00g006570	0		0	0	0	0	0	0	0	0	0	0	0	0	0	0	0	0	0	0	0	0	0	0	0	0	0	0	0	0	0	0	0	0	0	0	0	0	0	0	0	0	0	0	0	0	0	0	0
Solyc00g006590	0.59		0	0	0.025	0	0	0	0	0	0	0	0	0.0475	0	0.035	0	0.1375	0	0.0325	0	0	0	0	0	0.025	0	0	0	0.02	0.055	0.0675	0	0	0	0	0.0875	0.05	0	0	0	0	0.0775	0	0	0.0625	0	0	0.05
Solyc00g006600	0.1725		0	0.0475	0.0725	0.075	0.0325	0.0225	0	0	0.0275	0	0	0	0	0.0225	0	0.0525	0	0.0275	0.0325	0	0	0	0	0	0	0.025	0	0	0	0	0	0	0	0	0.1725	0.0275	0.0625	0	0	0.0275	0	0.1125	0	0	0	0	0
Solyc00g006630	1.3725	Expressed	0	0	0	0	0	0	0	0	0	0	0	0	0	0	0	0	0	0	0	0	0	0	0	0	0	0	0.02	0	0	0	0	0	0	0	0	0	0	0.0425	0.0625	0.1025	0.0575	0.06	0	0.0425	0	0	0.025
Solyc00g006650	0.0525		0	0	0	0	0	0	0	0	0	0	0	0	0	0	0	0	0	0	0	0	0	0	0	0	0	0	0	0	0	0	0	0	0	0	0	0	0	0	0	0	0	0	0	0	0	0	0
Solyc00g006660	0.0433333		0	0	0	0	0	0	0	0	0	0	0	0	0	0	0	0	0	0	0	0	0	0	0	0	0	0	0	0	0	0	0	0	0	0.0433333	0	0	0	0	0	0	0	0	0	0	0	0	0
Solyc00g006670	0.285		0.04	0	0	0	0.0275	0	0	0	0	0	0	0	0	0	0	0	0	0.02	0	0	0	0	0	0	0	0.03	0	0	0.02	0	0	0	0	0.0433333	0.0175	0	0	0	0.025	0	0	0.025	0	0	0.0275	0	0
Solyc00g006680	0.035		0	0	0	0	0	0	0	0	0	0	0	0	0	0	0	0	0	0	0	0	0	0	0	0	0	0	0	0	0	0	0	0	0	0	0	0	0	0	0	0	0	0	0	0	0	0	0
Solyc00g006690	0.0733333		0	0	0	0	0	0	0	0	0	0	0	0	0	0	0	0	0	0	0	0	0	0	0	0	0	0	0	0	0	0	0	0	0	0.0433333	0	0	0	0	0	0	0	0	0	0	0	0	0
Solyc00g006700	0.253333		0	0.1475	0	0	0	0	0.055	0	0	0	0.0275	0	0.0525	0	0	0	0.0333333	0	0	0	0	0.06	0.0325	0	0.035	0	0.02	0.045	0.0475	0.07	0	0.07	0.0233333	0	0.0175	0	0.03	0	0	0.0225	0	0.025	0.03	0.0625	0.0275	0.0225	0
Solyc00g006800	669.237	Expressed	108.743	152.675	223.417	234.84	183.637	178.73	197.725	195.915	176.477	183.8	194.065	141.23	162.195	161.005	151.202	198.512	116.703	174.292	253.425	247.268	221.18	172.847	205.68	188.6	144.91	142.923	138.545	128.368	124.19	127.002	123.785	160.303	295.16	81.1667	255.635	228.065	241.338	193.01	207.39	180.613	98.26	106.728	114.627	125.88	118.362	114.603	125.975
Solyc00g006810	55.4525	Expressed	9.39333	40.8425	49.11	40.475	31.575	23.8575	25.6175	28.485	36.38	36.0675	38.515	48.3325	46.56	51.19	51.6475	55.4525	18.7833	40.8775	45.4625	26.37	22.9525	16.8975	18.5975	22.9575	32.155	34.2375	37.6125	40.83	45.1975	52.0125	48.675	52.64	12.34	4.58333	45.2825	26.0425	30.4875	34.0225	29.1075	32.9125	34.4675	33.87	31.4975	34.29	39.225	36.03	40.52
Solyc00g006820	172.187	Expressed	7.91	7.23	7.505	12.8	9.315	10.82	10.0175	10.0175	3.895	4.6575	5.2475	1.965	1.875	1.95	1.36	0.3925	3.28667	7.4575	5.77	6.08	6.5025	4.2975	6.6475	3.7325	1.0925	1.42	0.9275	0.3775	0.415	0.385	0.1075	0.0925	9.89333	16.43	12.525	12.9425	11.925	7.6925	5.1975	7.295	0.1825	0.305	0.485	0.055	0.0625	0.0375	0.0375
Solyc00g006830	51.92	Expressed	16.7167	9.2	14.0625	14.5325	26.7275	27.88	28.1425	33.1225	26.495	32.355	35.1275	25.075	27.92	28.3525	21.2375	21.58	14.6767	13.67	17.7	43.9025	32.5625	29.23	34.26	25.99	20.5375	28.8025	23.16	23.285	19.5125	20.075	14.2225	25.2075	18.7033	6.41667	13.4575	25.86	26.815	24.0025	33.18	25.535	20.035	20.8875	26.395	18.25	26.36	17.0025	15.345
Solyc00g006840	0.75		0	0	0	0.025	0	0	0	0	0	0.025	0	0	0	0	0	0	0.0333333	0	0	0.025	0	0	0	0	0	0	0	0.0225	0	0	0	0	0.66	0.11	0	0.1025	0.095	0.0875	0.25	0.0675	0	0.025	0	0.0225	0.035	0	0.0475
Solyc00g006850	0		0	0	0	0	0	0	0	0	0	0	0	0	0	0	0	0	0	0	0	0	0	0	0	0	0	0	0	0	0	0	0	0	0	0	0	0	0	0	0	0	0	0	0	0	0	0	0
Solyc00g006860	0.03		0	0	0	0	0	0	0	0	0	0	0	0	0	0	0	0	0	0	0	0	0	0	0	0	0	0	0	0	0	0	0	0	0	0	0	0	0	0	0	0	0	0	0	0	0	0	0
Solyc00g006870	0		0	0	0	0	0	0	0	0	0	0	0	0	0	0	0	0	0	0	0	0	0	0	0	0	0	0	0	0	0	0	0	0	0	0	0	0	0	0	0	0	0	0	0	0	0	0	0
Solyc00g006880	0		0	0	0	0	0	0	0	0	0	0	0	0	0	0	0	0	0	0	0	0	0	0	0	0	0	0	0	0	0	0	0	0	0	0	0	0	0	0	0	0	0	0	0	0	0	0	0
Solyc00g006890	0		0	0	0	0	0	0	0	0	0	0	0	0	0	0	0	0	0	0	0	0	0	0	0	0	0	0	0	0	0	0	0	0	0	0	0	0	0	0	0	0	0	0	0	0	0	0	0
Solyc00g006900	2.31	Expressed	0	0.145	0.33	0.205	0.8275	1.2925	0.8575	0.855	0.785	0.95	0.91	1.475	0.8925	0.6925	0.6625	0.905	0	0.3475	0.255	1.0375	0.965	0.97	0.51	1.22	1.2175	1.0675	1.28	1.02	1.145	0.995	1.7525	1.945	0	0	0.4025	0.7325	0.615	0.8725	1.0175	0.8975	0.675	0.77	0.8725	0.58	0.5525	0.79	1.0525
Solyc00g007000	1.565	Expressed	0	0.2175	0.0225	0	0.0775	0.0525	0.0875	0.03	0.0275	0	0.03	0.07	0.0675	0	0.055	0.0525	0	0.085	0.0325	0.055	0.0525	0	0.0625	0.165	0	0.08	0.0325	0	0	0	0	0.0125	0	0	0.0375	0	0.03	0.0475	0	0	0.0525	0.055	0.0525	0.0625	0.0325	0	0.04
Solyc00g007010	35.1633	Expressed	15.5233	11.965	15.5325	11.2125	13.6575	13.315	12.7775	13.9	16.805	17.0125	17.8375	14.3925	17.3625	18.7575	15.5575	20.935	9.52	11.8625	12.22	14.66	12.0875	10.3025	10.7375	9.735	13.425	13.155	13.2075	14.895	13.92	15.12	12.34	18.185	12.8767	19.8467	12.31	11.4475	9.875	14.5325	14.685	11.47	9.79	8.81	12.0075	13.6825	15.08	12.565	14.8575
Solyc00g007020	0		0	0	0	0	0	0	0	0	0	0	0	0	0	0	0	0	0	0	0	0	0	0	0	0	0	0	0	0	0	0	0	0	0	0	0	0	0	0	0	0	0	0	0	0	0	0	0
Solyc00g007030	69.535	Expressed	0	0.065	0.03	0.0525	0	0	0	0	0	0	0	0	0	0	0.03	0	0	0.3325	0.835	0.995	0.2575	0.0575	0	0	0	0.025	0	0	0.035	0.025	0	0.025	0	0	7.615	12.82	0.9175	0.0425	0.0975	0.0925	0.0525	0	0	0.0225	0.035	0.1075	0.0225
Solyc00g007040	10.86	Expressed	0	0.02	0	0.0525	0	0	0	0	0	0	0	0	0	0	0	0	0	0.0225	0.21	0.1075	0.0275	0	0	0	0	0	0	0	0	0	0	0	0	0	1.195	2.38	0.0975	0	0.1225	0	0	0	0	0	0	0.025	0
Solyc00g007050	0.0325		0	0	0	0	0	0	0	0	0	0	0	0	0	0	0	0	0	0	0	0	0	0	0	0	0	0	0.0325	0	0	0	0	0	0	0	0	0	0	0	0	0	0	0	0	0	0	0	0
Solyc00g007060	31.08	Expressed	13.6733	31.08	20.5225	19.1425	16.105	15.76	13.5275	13.735	17.5225	14.9025	13.605	10.9	9.495	8.0625	7.6925	8.5975	7.57333	26.825	16.175	13.87	12.6975	11.335	12.26	9.77	12.455	9.665	10.2575	7.645	5.3325	6.92	5.02	6.62	5.19333	3.13	15.595	13.7425	10.855	12.1625	13.0125	10.1175	4.5425	4.925	5.41	4.3175	3.12	2.37	3.6325
Solyc00g007070	164.54	Expressed	75.6833	100.448	79.2425	90.1925	72.5825	57.475	62.1325	65.005	70.87	74.365	75.2325	65.585	66.765	66.015	65.0375	78.74	92.3533	99.215	78.455	74.4425	70.18	56.385	58.12	59.575	60.56	58.055	59.8425	59.4875	61.09	62.5875	56.565	79.41	58.53	52.2733	73.94	64.8625	56.0375	57.3425	54.475	53.6375	55.0775	57.905	56.3825	69.9225	71.4425	64.58	74.72
Solyc00g007080	10.4267	Expressed	1.74333	4.885	5.23	2.2825	1.1725	0.645	0.74	0.9225	0.3	0.2725	0.3475	0.1175	0.135	0.045	0.1775	0.14	1.21	5.6625	4.085	1.635	0.245	0.18	0.29	0.2525	0.035	0.07	0.2375	0	0.035	0.0725	0.0575	0.0125	2.24333	2.9	1.87	0.84	0.4175	0.2225	0.16	0.265	0.16	0.145	0.3425	0.065	0.0325	0.1275	0.1425
Solyc00g007090	30.55	Expressed	17.1	18.2275	11.845	13.135	7.3375	8.375	8.075	8.92	8.0275	8.485	7.8875	5.7875	5.3225	6.605	6.94	7.49	9.44	18.34	10.7675	9.4375	8.2775	8.35	8.775	6.71	5.8275	6.095	6.3425	6.7225	5.1	6.9425	5.3525	6.575	17.06	17.5967	13.785	12.8825	10.9025	13.82	9.955	10.435	8.75	7.7875	7.96	7.505	9.1525	7.3075	7.655
Solyc00g007100	41.5325	Expressed	3.37667	12.785	13.7675	22.5275	28.3525	34.8375	33.0125	29.195	36.6775	30.1	25.7375	23.5475	19.7325	15.755	15.8775	17.305	3.63	13.2325	12.4475	23.54	27.255	36.6125	25.9975	30.705	26.7075	20.355	21.75	18.9375	16.12	16.0375	14.1975	17.35	4.75667	1.13667	13.895	23.5425	27.13	22.3875	19.295	18.5275	12.1175	9.835	10.0975	10.2125	9.575	7.9275	10.38
Solyc00g007110	12.22	Expressed	0	1.8025	3.72	2.0025	8.035	10.7	12.22	10.9325	7.5175	8.615	7.2775	6.15	5.095	4.5375	3.985	3.9	0	3.1675	2.38	9.885	10.3025	9.9775	8.1125	10.6975	7.135	6.9725	6.0625	4.4975	4.5275	4.405	4.2625	4.8725	0.09	0	2.275	8.3075	8.155	7.155	8.4375	6.885	3.28	3.275	3.6025	2.85	2.8525	2.05	2.4575
Solyc00g007120	20.4575	Expressed	3.14667	11.565	14.8725	13.7925	16.5975	17.32	19.1175	16.0525	11.155	11.76	10.8225	9.4275	8.35	6.62	5.5975	6.2675	3.79333	13.76	14.4175	20.4575	16.8125	15.62	12.3025	16.5875	9.485	9.86	9.48	6.6075	7.0025	6.9775	6.3275	8.5675	0.693333	1.18333	12.6775	16.8325	12.9325	12.1425	14.0075	13.115	5.36	5.0125	6.025	3.69	3.4675	3.81	4.5625
Solyc00g007130	22.8233	Expressed	0.326667	0.16	0.33	0.4675	0.9	0.28	0.6825	0.545	0.5275	0.785	1.165	0.695	0.7875	0.8175	0.8575	1.335	0.433333	0.245	0.305	0.605	0.3275	0.1825	1.0225	0.33	0.5475	0.6075	0.905	0.7325	0.7225	1.0425	0.5225	0.7725	3.15667	0.92	0.2675	0.41	0.515	0.4575	1.1275	0.87	0.39	0.8	0.8225	0.2675	0.72	0.7075	0.265
Solyc00g007140	0.065		0	0.04	0	0	0	0	0	0	0	0.065	0	0	0	0.035	0	0	0	0	0	0	0	0.0625	0	0	0	0	0	0	0	0	0	0	0	0	0	0.0225	0	0	0	0	0	0	0	0	0	0	0
Solyc00g007150	17.47	Expressed	8.01	4.0325	2.3325	1.3875	1.065	1.2525	0.85	1.1625	1.12	0.9075	1.3375	0.32	0.375	0.445	0.125	0.13	4.21667	2.5625	2.7	2.2375	0.56	0.6375	0.6775	0.8875	0.3325	0.34	0.335	0.21	0.235	0.16	0.39	0.275	9.86667	14.4567	2.86	1.235	0.52	0.8625	0.74	0.515	0.585	0.6375	0.74	0.9375	1.1275	1.0775	1.395
Solyc00g007160	0.35		0	0.1675	0.025	0.0975	0.09	0.1175	0.1625	0.065	0.125	0.09	0.0575	0.0225	0.0225	0.045	0.025	0.11	0	0.27	0.0275	0.0525	0.1075	0.03	0	0	0	0	0.02	0.0225	0.02	0	0	0	0	0	0.075	0	0	0.045	0	0.0275	0.075	0	0.05	0.0225	0.0675	0.0225	0.055
Solyc00g007170	5.87333	Expressed	0.123333	0.0325	0.05	0.05	0.085	0.1175	0.0325	0.06	0	0.0575	0.0575	0	0	0.0225	0.0225	0.0575	0.296667	0.1575	0.0275	0.05	0.0225	0	0.065	0.03	0	0	0.02	0	0.0725	0.045	0	0.0125	0.06	0.273333	0	0.0225	0	0	0	0	0.08	0	0	0.0225	0.0325	0.0225	0.02
Solyc00g007180	0.0766667		0	0	0	0	0	0	0	0.0325	0	0	0	0	0	0	0	0	0	0	0	0	0	0	0	0	0	0	0	0	0	0	0	0	0	0	0	0	0	0	0	0	0	0	0	0	0	0	0
Solyc00g007190	2.70333	Expressed	0.493333	1.2525	1.385	0.965	1.505	1.4475	1.6425	1.1025	1.125	1.03	0.5325	0.6775	0.3525	0.4275	0.535	0.62	0.1	1.675	1.2225	1.26	0.8475	1.0775	0.7175	0.9575	0.6825	0.8275	0.6475	0.535	0.3975	0.4525	0.4475	0.65	0.366667	1.84667	1.115	1.3075	1.5125	1.44	1.3575	1.0275	0.555	0.685	0.4475	0.47	0.31	0.285	0.3225
Solyc00g007200	15.6567	Expressed	7.03333	1.1625	0.5975	0.2725	0.3275	0.1175	0.095	0.2	0.185	0.095	0.17	0	0	0.0225	0.0625	0	3.38333	1.5825	1.2825	0.735	0.305	0.2675	0.3375	0.1575	0.025	0.17	0.0875	0.045	0.0925	0	0	0.0125	11.6367	1.23667	1.135	1.44	1.6775	1.86	1.9025	1.4225	0.0475	0.0275	0.0525	0.065	0.035	0.07	0
Solyc00g007210	0.03		0	0	0	0	0	0	0	0	0	0	0	0	0	0	0	0	0	0	0	0	0	0	0	0	0	0	0	0	0	0	0	0	0	0	0	0	0	0	0	0	0	0	0	0	0	0	0
Solyc00g007220	197.5	Expressed	5.16333	0.5675	0.495	2.54	5.0475	6.065	7.4075	5.9	12.14	17.4975	14.1425	22.225	17.55	17.99	16.7575	16.205	21.0167	1.78	1.8625	2.1475	5.4275	9.535	11.7575	12.7075	24.79	24.03	29.275	18.7325	23.6025	20.3375	15.985	21.3275	8.33333	8.60333	9.8975	13.59	16.035	18.2725	16.5075	17.645	18.995	24.0375	21.605	16.085	17.925	14.3525	17.93
Solyc00g007230	0.2		0	0	0	0	0	0	0	0	0	0	0	0	0.0525	0	0	0.0525	0	0	0	0	0	0	0.03	0	0	0	0	0.02	0	0	0	0	0	0	0	0	0	0	0	0	0	0.0525	0	0	0	0	0.0225
Solyc00g007240	0.03		0	0	0	0	0	0	0	0	0	0	0	0	0	0	0	0	0	0	0	0	0.0225	0	0	0	0	0	0	0	0	0	0	0	0	0	0	0	0	0	0	0	0	0	0	0	0	0	0
Solyc00g007250	0.0475		0	0	0	0	0	0	0	0	0	0	0	0	0	0	0	0	0	0	0	0	0	0	0	0	0	0	0	0	0	0	0	0	0	0	0	0	0	0	0	0	0	0.0325	0	0	0	0	0
Solyc00g007260	127.573	Expressed	127.573	12.725	11.2075	9.955	11.8	10.4825	10.925	11.1425	7.66	8.9225	7.89	6.635	5.095	4.2875	4.1075	5.485	63.6533	14.8125	11.295	12.84	9.4925	9.3125	7.2125	12.665	6.505	6.015	7.995	3.5025	4.635	3.2975	4.38	6.525	47.3867	40.75	12.05	15.9775	8.3125	7.3875	8.405	9.545	3.9825	3.27	3.61	2.6575	2.7575	2.2475	3.155
Solyc00g007270	1269.1	Expressed	1269.1	198.42	203.398	314.353	322.197	328.64	344.592	354.18	310.24	352.457	352.71	187.57	183.22	163.99	156.792	186.368	950.09	191.975	198.67	381.923	455.108	418.067	538.678	427.29	292.483	246.093	281.065	138.657	132.018	144.912	122.578	157.548	762.167	371.227	156.743	279.725	317.365	340.905	353.447	347.712	155.705	160.643	152.148	148.54	144.357	113.735	135.822
Solyc00g007290	0.05		0	0	0	0	0	0	0	0	0	0	0	0	0	0	0	0	0	0	0	0	0	0	0	0.05	0	0	0	0	0	0	0	0	0	0	0	0	0	0	0	0	0	0	0	0	0	0	0
Solyc00g007300	147.62	Expressed	1.49667	3.7925	7.35	8.885	11.26	26.0025	15.7	11.7575	26.04	20.8	14.855	16.4425	13.315	9.535	13.0825	16.365	1.78333	5.3975	9.56	16.3125	12.22	29.5675	15.38	13.83	30.965	30.9875	23.81	22.6475	27.7575	16.9625	21.8775	28.8275	34.6933	2.79667	7.9875	12.2775	13.0625	16.02	17.645	12.81	114.075	116.85	106.63	135.275	147.62	119.358	114.043
Solyc00g007310	0.115		0	0	0	0.0225	0	0	0	0.03	0	0	0	0.025	0	0	0	0	0	0	0	0.0275	0	0	0.035	0	0.0325	0	0	0	0	0	0.0275	0	0.03	0	0	0	0	0	0.03	0	0	0	0.0625	0	0.0275	0	0
Solyc00g007320	0.516667		0	0	0	0	0	0	0	0	0	0	0	0	0	0	0	0	0	0.0275	0	0	0	0	0	0	0	0	0	0	0	0	0	0	0	0.0833333	0.0975	0	0	0	0	0	0	0	0	0	0	0	0
Solyc00g007330	0.1		0.04	0	0	0	0	0	0	0	0	0	0	0	0	0	0	0	0	0	0	0	0	0	0	0	0	0	0	0	0	0	0	0.025	0	0	0	0	0	0	0	0	0	0	0	0	0	0	0
Solyc00g007340	0		0	0	0	0	0	0	0	0	0	0	0	0	0	0	0	0	0	0	0	0	0	0	0	0	0	0	0	0	0	0	0	0	0	0	0	0	0	0	0	0	0	0	0	0	0	0	0
Solyc00g007350	0.5725		0	0	0	0	0	0	0	0	0	0	0	0	0	0	0	0	0	0	0	0	0	0	0	0	0	0	0	0	0	0	0	0	0	0	0.18	0.0575	0.0325	0	0	0	0	0	0	0	0	0	0
Solyc00g007450	0.055		0	0	0	0	0	0	0	0	0	0	0	0	0	0	0	0	0	0	0	0	0	0	0	0	0.035	0	0	0	0	0	0	0	0	0	0.0175	0	0	0	0	0	0	0	0	0	0	0	0
Solyc00g007550	0.5225		0	0.235	0.16	0	0.3375	0.205	0.36	0.175	0.2525	0.1125	0.5225	0.115	0.15	0.38	0.08	0.19	0	0.21	0.1375	0.3475	0.125	0.09	0.09	0.0675	0.1375	0.1125	0.0675	0.13	0.07	0.1425	0	0.1925	0	0.0366667	0.115	0.2475	0.095	0.14	0.1275	0.0525	0.1075	0.0825	0.115	0.1075	0.035	0.045	0.125
Solyc00g007560	3.5125	Expressed	0	0	0	0	0	0	0	0	0	0	0	0	0	0	0	0	0	0	0	0.0825	0.0275	0	0	0	0	0	0	0	0	0	0	0	0	0	0.165	0.5475	0	0	0	0.0275	0	0	0.03	0	0.035	0.0175	0
Solyc00g007570	0.025		0	0	0	0	0	0	0	0	0	0	0	0	0	0	0	0	0	0	0	0	0	0	0	0	0	0	0	0	0	0	0	0	0	0	0	0	0	0	0	0	0	0	0	0	0	0	0
Solyc00g007580	0.0525		0	0	0	0	0	0	0	0	0	0	0	0	0	0	0	0	0	0	0	0	0	0	0	0	0	0	0	0	0	0	0	0	0	0	0.025	0	0	0	0	0	0	0	0	0	0	0	0
Solyc00g007590	0.0333333		0	0	0	0	0	0	0	0	0	0	0	0	0	0	0	0	0	0	0	0	0	0	0	0	0	0	0	0	0	0	0	0	0	0	0	0	0	0	0	0	0	0	0	0	0	0	0
Solyc00g007600	0.3		0	0.0225	0.025	0.0775	0.1325	0.15	0.09	0.1425	0.3	0.1925	0.19	0.11	0.115	0.0275	0.0525	0	0	0.0225	0	0.0525	0.0775	0.0625	0.095	0.135	0.0675	0.07	0.0525	0.0675	0	0.1125	0	0.0125	0	0	0.075	0.0725	0	0.1575	0.045	0	0	0	0.025	0.0225	0.0325	0	0
Solyc00g007610	0		0	0	0	0	0	0	0	0	0	0	0	0	0	0	0	0	0	0	0	0	0	0	0	0	0	0	0	0	0	0	0	0	0	0	0	0	0	0	0	0	0	0	0	0	0	0	0
Solyc00g007910	0.035		0	0	0	0	0	0	0	0	0	0	0	0	0	0	0	0	0	0	0	0	0	0	0	0	0	0	0	0	0	0	0	0	0	0	0	0	0	0	0	0	0	0	0	0	0	0	0
Solyc00g007920	0.0675		0	0	0	0	0	0	0	0	0	0	0	0	0	0	0	0	0	0	0	0	0	0	0	0	0	0	0	0	0	0	0	0	0	0	0	0	0	0	0	0	0	0	0	0	0	0	0
Solyc00g007930	0.11		0	0	0	0	0	0	0	0	0	0	0	0	0	0	0	0	0	0	0	0	0	0	0	0	0	0	0	0	0	0	0	0	0	0	0	0	0	0	0	0	0	0	0	0	0	0	0
Solyc00g007940	0.045		0	0	0	0	0	0	0	0	0	0	0	0	0	0	0	0	0	0	0	0	0	0	0	0	0	0	0	0	0	0	0	0	0	0	0	0	0	0	0	0	0	0	0	0	0	0	0
Solyc00g007950	0.035		0	0	0	0	0	0	0	0	0	0	0	0	0	0	0	0	0	0	0	0	0	0	0	0	0	0	0	0	0	0	0	0	0	0	0	0	0	0	0	0	0	0	0	0	0.035	0	0
Solyc00g007960	0.045		0	0	0	0	0	0	0	0	0	0	0	0	0	0	0	0	0	0	0	0	0	0	0	0	0	0	0	0	0	0	0	0	0	0	0	0	0	0	0	0	0	0	0	0	0	0	0
Solyc00g007970	0.09		0	0	0	0	0	0	0	0	0	0	0	0	0	0	0	0	0	0	0	0	0	0	0	0	0	0	0	0	0	0	0	0	0	0	0	0	0	0	0	0	0	0	0	0	0	0	0
Solyc00g007980	0.0675		0	0	0	0	0	0	0	0	0	0	0	0	0	0	0	0	0	0	0	0	0	0	0	0	0	0	0	0	0	0	0	0	0	0	0	0	0	0	0	0	0	0	0.03	0	0	0	0
Solyc00g007990	0.03		0	0	0	0	0	0	0	0	0	0	0	0	0	0	0	0	0.03	0	0	0	0	0	0	0	0	0	0	0	0	0	0	0	0	0	0	0	0	0	0	0	0	0	0.025	0	0	0	0
Solyc00g008000	0.155		0	0	0	0	0	0	0	0	0	0	0	0	0	0	0	0	0	0	0	0	0	0	0	0	0	0	0.02	0	0	0	0	0	0	0	0	0	0	0	0	0	0	0	0.025	0	0	0	0
Solyc00g008010	0.0225		0	0	0	0	0	0	0	0	0	0	0	0	0	0	0	0	0	0	0	0	0	0	0	0	0	0	0	0	0	0	0	0	0	0	0	0	0	0	0	0	0	0	0	0	0	0	0
Solyc00g008020	0.0325		0	0	0	0	0	0	0	0	0	0	0	0	0	0	0	0	0	0	0	0	0	0	0	0	0	0	0	0	0	0	0	0	0	0	0	0	0	0	0	0	0	0	0	0	0	0	0
Solyc00g008030	0.0333333		0	0	0	0	0	0	0	0	0	0	0	0	0	0	0	0	0	0	0	0	0	0	0	0	0	0	0	0	0	0	0	0	0	0	0	0	0	0	0	0	0	0	0	0	0	0	0
Solyc00g008040	0.0275		0	0	0	0	0	0	0	0	0	0	0	0	0	0	0	0	0	0	0	0	0	0	0	0	0	0	0	0	0	0	0	0	0	0	0	0	0	0	0	0	0	0	0	0	0	0	0
Solyc00g008050	0		0	0	0	0	0	0	0	0	0	0	0	0	0	0	0	0	0	0	0	0	0	0	0	0	0	0	0	0	0	0	0	0	0	0	0	0	0	0	0	0	0	0	0	0	0	0	0
Solyc00g008060	0.0275		0	0	0	0	0	0	0	0	0	0	0	0	0	0	0	0	0	0	0	0	0	0	0	0	0	0	0	0	0	0	0	0	0	0	0	0	0	0	0	0	0	0	0	0	0	0	0
Solyc00g008070	0.09		0	0	0	0	0	0	0	0	0	0	0	0	0	0	0	0	0	0	0	0	0	0	0	0	0	0	0	0	0	0	0	0	0	0	0	0	0	0	0	0	0	0	0	0	0	0	0
Solyc00g008080	0.025		0	0	0	0	0	0	0	0	0	0	0	0	0	0	0	0	0	0	0	0	0	0	0	0	0	0	0	0	0	0	0	0	0	0	0	0	0	0	0	0	0	0	0	0	0	0	0
Solyc00g008090	0.0225		0	0	0	0	0	0	0	0	0	0	0	0	0	0	0	0	0	0	0	0	0	0	0	0	0	0	0	0	0	0	0	0	0	0	0	0	0	0	0	0	0	0	0	0	0	0	0
Solyc00g008100	0.035		0	0	0	0	0	0	0	0	0	0	0	0	0	0	0	0	0	0	0	0	0	0	0	0	0	0	0	0	0	0	0	0	0	0	0	0	0	0	0	0	0	0	0.025	0	0.035	0	0
Solyc00g008110	0.0725		0	0	0	0	0	0	0	0	0	0	0	0	0	0	0	0	0	0	0	0	0	0	0	0	0	0	0	0	0	0	0	0	0	0	0	0	0	0	0	0	0	0	0.025	0	0	0	0
Solyc00g008120	0.155		0	0	0	0	0	0	0	0	0	0	0	0	0	0	0	0	0	0	0	0	0	0	0	0	0	0	0	0	0	0	0	0	0	0	0	0	0	0	0	0	0	0	0.03	0	0	0	0
Solyc00g008130	0.09		0	0	0	0	0	0	0	0	0	0	0	0	0	0	0	0	0	0	0	0	0	0	0	0	0	0	0	0	0	0	0	0	0	0	0	0	0	0	0	0	0	0	0	0	0	0	0
Solyc00g008140	0.035		0	0	0	0	0	0	0	0	0	0	0	0	0	0	0	0	0	0	0	0	0	0	0	0	0	0	0	0	0	0	0	0	0	0	0	0	0	0	0	0	0	0	0	0	0.035	0	0
Solyc00g008150	0.065		0	0	0	0	0	0	0	0	0	0	0	0	0	0	0	0	0	0	0	0	0	0	0	0	0	0	0	0	0	0	0	0	0	0	0	0	0	0	0	0	0	0	0	0	0	0	0
Solyc00g008160	0.045		0	0	0	0	0	0	0	0	0	0	0	0	0	0	0	0	0	0	0	0	0	0	0	0	0	0	0	0	0	0	0	0	0	0	0	0	0	0	0	0	0	0	0	0	0	0	0
Solyc00g008260	0.03		0	0	0	0	0	0	0	0	0	0	0	0	0	0	0	0	0	0	0	0	0	0	0	0	0	0	0	0	0	0	0	0	0	0	0	0	0	0	0	0	0	0	0.03	0	0	0	0
Solyc00g008270	0.025		0	0	0	0	0	0	0	0	0	0	0	0	0	0	0	0	0	0	0	0	0	0	0	0	0	0	0	0	0	0	0	0	0	0	0	0	0	0	0	0	0	0	0	0	0	0	0
Solyc00g008570	2.135	Expressed	0	0.0825	0.03	0.0725	0.0325	0.03	0.0225	0	0	0.025	0	0.045	0.0275	0.0575	0.03	0.03	0	0.1825	0	0	0	0.03	0.125	0	0	0	0	0	0	0.02	0	0	0	0.0433333	0.3075	0.26	0.095	0.0425	0	0	0.0475	0.025	0.0825	0	0	0.0275	0.045
Solyc00g008580	0		0	0	0	0	0	0	0	0	0	0	0	0	0	0	0	0	0	0	0	0	0	0	0	0	0	0	0	0	0	0	0	0	0	0	0	0	0	0	0	0	0	0	0	0	0	0	0
Solyc00g008680	173.24	Expressed	51.5867	141.26	139.17	118.73	136.045	132.482	133.065	141.558	134.583	143.208	146.012	153.69	152.327	154.45	136.183	130.238	38.8033	142.18	152.498	162.822	149.16	152.452	129.725	143.667	170.977	173.24	154.708	154.262	142.417	142.653	139.097	140.54	23.0133	22.2567	120.44	134.007	134.982	122.185	123.02	133.36	167.708	157.442	154.725	142.845	134.637	144.007	138.752
Solyc00g008690	0.035		0	0	0	0	0	0	0	0	0	0	0	0	0	0.035	0	0	0	0	0	0	0	0	0	0	0	0	0	0	0	0	0	0	0	0	0	0	0	0	0	0	0	0	0	0	0	0	0
Solyc00g008800	0.035		0	0	0	0	0	0	0	0	0	0	0	0	0	0	0	0	0	0	0	0	0	0	0	0	0	0	0	0	0	0	0	0	0	0	0	0	0	0	0	0	0	0	0	0	0	0	0
Solyc00g008900	0.09		0	0	0	0	0	0	0	0	0	0	0	0	0	0	0	0	0	0	0	0	0	0	0	0	0	0	0	0	0	0	0	0	0	0	0	0	0	0	0	0	0	0	0.025	0	0	0	0
Solyc00g008910	0.0725		0	0	0	0	0	0	0	0	0	0	0	0	0	0	0	0	0	0	0	0	0	0	0	0	0	0	0	0	0	0	0	0	0	0	0	0	0	0	0	0	0	0	0	0	0.035	0	0
Solyc00g008920	0		0	0	0	0	0	0	0	0	0	0	0	0	0	0	0	0	0	0	0	0	0	0	0	0	0	0	0	0	0	0	0	0	0	0	0	0	0	0	0	0	0	0	0	0	0	0	0
Solyc00g009020	357.915	Expressed	83.8733	357.915	296.29	262.027	167.565	139.857	138.87	159.053	153.525	163.322	175.79	117.493	118.312	108.5	119.062	127.045	100.94	305.798	298.478	224.145	149.11	110.485	120.805	123.93	119.16	116.213	111.195	115.085	95.655	116.105	93.6775	98.705	72.58	112.99	229.77	189.91	154.95	124.422	119.847	117.515	110.57	104.36	113.99	108.843	113.377	104.895	116.61
Solyc00g009030	5.75	Expressed	2.49	0.1225	0.1025	0	0.0525	0.045	0.0225	0	0	0	0.05	0.07	0.045	0	0.03	0	2.50667	0.1775	0.0325	0.0275	0	0	0.035	0	0	0.015	0.035	0.0225	0.02	0	0	0.0375	2.6	2.59333	0.1	0.0275	0	0	0.03	0	0	0	0	0.0225	0.13	0.025	0.02
Solyc00g009040	94.49	Expressed	1.52333	0.4275	0.375	0.2475	0.08	0.03	0.0825	0.0875	0.0275	0.0575	0.0575	0.025	0.03	0	0	0.0425	0.0633333	2.6775	1.685	1.745	0.7475	0.44	0.1325	0.065	0.0575	0.1775	0.1175	0.02	0.055	0.03	0.03	0.0125	13.13	5.69	6.145	17.5975	2.84	0.2575	0.37	0.385	0.19	0.28	0.155	0.095	0.17	0.105	0.0575
Solyc00g009050	9.005	Expressed	0.576667	6.0425	2.2725	0.8675	0.41	0.3975	0.5125	0.59	0.535	0.68	0.3725	0.07	0.03	0.0925	0.0225	0.0825	0.72	5.925	2.17	0.695	0.3525	0.275	0.3475	0.655	0.4325	0.2375	0.3475	0.12	0.02	0	0.0275	0.13	0	1.11667	3.055	1.8075	0.65	0.42	0.5275	0.345	0	0.215	0.0975	0.0225	0.06	0.0225	0.04
Solyc00g009060	36.8975	Expressed	5.59667	13.52	13.35	21.5425	16.705	15.38	15.4125	16.495	17.065	17.7025	17.4325	19.83	15.455	15.6175	18.1775	20.265	3.5	13.6575	16.01	14.5825	13.3975	15.955	15.775	18.56	18.315	21.195	20.235	18.1525	20.0975	17.9925	24.8575	28.9575	3.01	3.57	21.82	18.9075	25.6475	26.2825	23.7475	27.3225	20.6025	17.955	18.105	16.25	16.09	16.545	21.5125
Solyc00g009070	2.385	Expressed	0.513333	0.0225	0	0	0	0.03	0	0	0.055	0.1525	0.105	0	0.0675	0.095	0.125	0.32	0.656667	0	0.0475	0.1575	0	0	0.155	0	0	0	0	0	0.0325	0.025	0	0	0.406667	0.483333	0	0.46	0	0.045	0.0275	0.0325	0	0.0475	0.025	0.12	0.18	0.0175	0
Solyc00g009080	63.425	Expressed	13.1233	63.425	33.2425	27.52	14.81	12.55	12.4925	14.4525	12.2775	13.35	12.9425	9.3475	7.77	9.435	9.835	12.5425	14.46	44.595	32.43	17.21	12.7825	10.3725	9.415	11.355	11.36	9.6875	11.7875	7.3475	8.1825	8.05	8.8175	12.7225	4.63667	9.03667	31.505	14.3975	15.6525	12.11	10.925	15.5175	9.1625	7.1875	6.835	6.9	4.9575	6.875	7.9775
Solyc00g009090	11.8967	Expressed	2.11667	0.075	0	0.0275	0.065	0	0	0	0	0	0	0	0	0	0	0	11.8967	0.075	0	0.18	0.1025	0.0575	0	0	0	0	0.035	0.0225	0	0	0	0	0.486667	0	0.145	1.44	0.615	0.045	0.0525	0.04	0	0	0	0	0	0.0275	0
Solyc00g009100	27.5325	Expressed	3.06	24.855	20.805	15.215	16.0325	14.1	16.6	15.0775	14.66	17.985	16.35	20.3325	15.9475	17.195	16.09	18.9375	4.14667	27.5325	16.1825	14.125	10.2825	9.95	8.3125	10.63	13.435	13.9875	13.615	15.18	13.51	14.97	15.065	17.93	1.04667	1.43	17.495	13.08	10.87	10.3725	10.94	11.34	7.4425	7.44	6.9675	7.0225	7.4525	7.01	8.1225
Solyc00g009110	38.8833	Expressed	22.2567	8.675	10.1275	18.8225	33.2675	30.6825	30.785	33.285	25.8575	21.39	19.9125	18.6175	15.185	9.53	8.6475	7.15	9.05	11.7025	7.47	13.625	16.5675	21.3225	14.7625	21.135	9.0525	6.6175	7.8375	8.62	6.5275	7.32	6.4025	5.8175	22.08	3.48333	8.225	8.2875	5.285	3.3425	3.2875	4.02	2.3425	2.685	2.175	2.545	2.5325	2.6875	3.75
Solyc00g009120	31.39	Expressed	1.95667	6.465	3.5925	5.72	4.985	2.035	2.34	2.72	2.47	2.375	3.385	2.345	4.35	5.08	6.83	9.1975	4.63667	3.2975	0.735	0.425	0.29	0.265	0.1575	0.475	0.1625	0.2325	0.6625	1.7225	1.3625	2.135	2.255	4.225	2.4	1.05667	0.53	0.4825	0.26	0.185	0.575	0.325	0.21	0.2	0.46	0.4825	0.83	0.865	1.3075
Solyc00g009130	58.96	Expressed	0.163333	5.1475	3.915	4.0875	4.0475	2.8975	2.8725	3.0475	3.7025	3.455	4.6175	6.395	10.39	11.0975	17.3475	21.8075	0.1	4.5675	1.9125	0.445	0.37	0.4875	0.3475	0.355	0.2525	0.45	0.5725	3.7175	3.0075	4.345	6.23	11.545	0.146667	0.806667	1.805	0.7025	0.4225	0.295	0.625	0.4925	0.615	0.6475	1.01	1.815	2.545	2.2775	3.41
Solyc00g009140	208.853	Expressed	9.44667	20.685	12.3825	13.5275	8.0875	5.6475	5.635	6.685	5.33	7.16	8.1975	14.1375	17.29	21.5975	30.2125	37.69	3.18667	13.8675	4.4375	0.835	0.625	0.91	0.435	0.845	0.73	1.0525	1.16	6.7975	7.28	8.355	12.675	23.595	9.48333	14.54	4.315	1.9275	0.715	0.55	1.035	0.63	1.325	1.415	1.8425	2.945	4.115	4.4125	7.3725
Solyc00g009240	0.035		0	0	0	0	0	0	0	0	0	0	0	0	0	0	0	0	0	0	0	0	0	0	0	0	0	0	0	0	0	0	0	0	0	0	0	0	0	0	0	0	0	0	0	0	0	0	0
Solyc00g009440	2.72	Expressed	0	0	0	0.0225	0	0	0	0.0325	0.0225	0.0325	0.05	0.045	0.0275	0	0.03	0	0	0	0	0.0275	0	0	0.06	0.0575	0.05	0.025	0	0.0225	0.0325	0	0.0225	0.105	0	0	0	0	0	0	0	0	0	0.055	0	0.0425	0.0625	0.0525	0
Solyc00g009540	0.025		0	0	0	0	0	0	0	0	0	0	0	0	0	0	0	0	0	0	0	0	0	0	0	0	0	0	0	0	0	0	0	0	0	0	0	0	0	0	0	0	0	0	0	0	0	0	0
Solyc00g009650	0.0675		0	0	0	0	0	0	0	0	0	0	0	0	0	0	0	0	0	0	0	0	0	0	0	0	0	0	0	0	0	0	0	0	0	0	0	0	0	0	0	0	0	0	0	0	0	0	0
Solyc00g009660	0.085		0	0	0	0	0	0	0	0	0	0	0	0	0	0	0	0	0	0	0	0	0	0	0	0	0	0	0	0	0	0	0	0	0	0	0	0	0	0	0	0	0	0	0	0	0	0	0
Solyc00g009760	0.123333		0	0	0	0	0	0	0	0	0	0	0	0	0	0	0	0	0	0	0	0	0	0	0	0	0	0	0	0	0	0	0	0	0	0	0	0	0	0	0	0	0	0	0	0	0	0	0
Solyc00g009770	0.9775		0	0.0225	0.0225	0.0225	0.0325	0	0	0	0	0	0	0	0	0	0	0	0	0.02	0	0	0	0	0	0	0	0	0.05	0	0	0	0	0	0	0	0	0	0	0	0	0.0275	0	0	0.0575	0	0.245	0.025	0
Solyc00g009780	0.04		0	0	0	0	0	0	0	0	0	0	0	0	0	0	0	0	0	0	0	0	0	0	0	0	0	0	0	0	0	0	0	0	0	0	0	0	0	0	0	0	0	0	0	0.0225	0	0	0
Solyc00g009790	0.1825		0	0.02	0.025	0.075	0.0625	0	0.0475	0.03	0	0	0.15	0	0	0	0.03	0.03	0	0.0475	0	0.025	0.0575	0	0	0	0	0	0	0	0	0	0	0	0	0	0.025	0	0	0	0	0	0	0.0275	0	0	0	0	0
Solyc00g009800	0.0425		0	0	0	0	0	0	0	0	0	0	0	0	0	0	0	0	0	0	0	0	0	0	0	0	0	0	0	0	0	0	0	0	0	0	0	0	0	0	0	0	0	0.025	0	0	0	0	0
Solyc00g010100	0.025		0	0	0	0	0	0	0	0	0	0	0	0	0	0	0	0	0	0	0	0	0	0	0	0	0	0	0	0	0	0	0	0	0	0	0	0	0	0	0	0	0	0	0	0	0	0	0
Solyc00g010110	0.03		0	0	0	0	0	0	0	0	0	0	0	0	0	0	0	0	0	0	0	0	0	0	0	0	0	0	0	0	0	0	0	0	0	0	0	0	0	0	0	0	0	0	0	0	0	0	0
Solyc00g010210	0.0225		0	0	0	0	0	0	0	0	0	0	0	0	0	0	0	0	0	0	0	0	0	0	0	0	0	0	0	0	0	0	0	0	0	0	0	0	0	0	0	0	0	0	0	0	0	0	0
Solyc00g010410	0.055		0	0	0	0	0	0	0	0	0	0	0	0	0	0	0	0	0	0	0	0	0	0	0	0	0	0	0	0	0	0	0	0	0	0	0	0	0	0	0	0	0	0	0.055	0	0	0	0
Solyc00g010420	0.0325		0	0	0	0	0	0	0	0	0	0	0	0	0	0	0	0	0	0	0	0	0	0	0	0	0	0	0	0	0	0	0	0	0	0	0	0	0	0	0	0	0	0	0	0	0	0	0
Solyc00g010520	0.0325		0	0	0	0	0	0	0	0	0	0	0	0	0	0	0	0	0	0	0	0	0	0	0	0	0	0	0	0	0	0	0	0	0	0	0	0	0	0	0	0	0	0	0	0	0	0	0
Solyc00g010530	0		0	0	0	0	0	0	0	0	0	0	0	0	0	0	0	0	0	0	0	0	0	0	0	0	0	0	0	0	0	0	0	0	0	0	0	0	0	0	0	0	0	0	0	0	0	0	0
Solyc00g010540	0.2875		0	0	0	0	0	0.0225	0	0.03	0.055	0	0	0.0225	0.1025	0.035	0	0	0	0.0275	0	0.0275	0.0275	0	0	0.025	0	0	0	0.02	0.065	0	0.0225	0.0125	0	0	0	0	0	0	0.105	0	0.0225	0.025	0.0575	0.055	0.13	0.0175	0.085
Solyc00g010550	1.5025	Expressed	0	0.045	0.0225	0.025	0	0.03	0	0.03	0.05	0.025	0	0	0.0275	0.03	0	0	0	0.11	0	0	0.0225	0	0	0	0	0	0	0	0.0325	0	0	0	0.03	0.0433333	0.3	0.1	0	0.02	0.0275	0.02	0	0.0475	0	0	0.035	0	0.0175
Solyc00g010750	0.3725		0	0	0.0225	0.1225	0	0	0.105	0.115	0.18	0.0325	0.03	0.0875	0.0525	0.215	0.085	0.1	0	0.02	0	0	0.07	0.0325	0.1325	0	0	0.04	0	0	0	0.02	0.0225	0.045	0	0	0.0675	0.345	0.065	0.02	0.11	0	0.03	0.1975	0.025	0.065	0.0275	0.12	0.0425
Solyc00g010760	0.0775		0	0	0	0	0	0	0	0	0	0	0.03	0	0	0	0	0	0	0	0	0	0	0	0	0	0	0	0	0	0	0	0	0	0	0	0	0	0	0	0	0	0	0	0	0	0	0	0
Solyc00g010770	0.1625		0	0.055	0	0.0475	0.0725	0	0	0.0275	0.0275	0	0	0.025	0.0225	0	0.0225	0	0	0	0	0.0825	0	0	0.0325	0.035	0	0	0	0	0	0	0	0	0	0	0	0	0	0	0.0225	0	0.03	0	0	0.0225	0	0	0
Solyc00g010780	3.5925	Expressed	0.543333	0.3	0.425	1.89	0.9225	0.7825	0.415	1.0875	0.5775	0.605	1.045	0.225	0.12	0.14	0.055	0.175	0.93	0.485	0.495	1.805	0.7325	0.625	1.0575	0.3975	0.245	0.49	0.19	0.0425	0	0.05	0	0.0225	0.463333	0.07	0.2325	0.9675	0.675	0.23	0.7225	0.3675	0.05	0	0.09	0.0325	0	0	0.0175
Solyc00g010790	0.0333333		0	0	0	0	0	0	0	0	0	0	0	0	0	0	0	0	0	0	0	0	0	0	0	0	0	0	0	0	0	0	0	0	0	0	0	0	0	0	0	0	0	0	0.025	0	0	0	0
Solyc00g010810	0		0	0	0	0	0	0	0	0	0	0	0	0	0	0	0	0	0	0	0	0	0	0	0	0	0	0	0	0	0	0	0	0	0	0	0	0	0	0	0	0	0	0	0	0	0	0	0
Solyc00g010930	0.025		0	0	0	0	0	0	0	0	0	0	0	0	0	0	0	0	0	0	0	0	0	0	0	0	0	0	0	0	0	0	0	0	0	0	0	0	0	0	0	0	0	0	0.025	0	0	0	0
Solyc00g011130	0		0	0	0	0	0	0	0	0	0	0	0	0	0	0	0	0	0	0	0	0	0	0	0	0	0	0	0	0	0	0	0	0	0	0	0	0	0	0	0	0	0	0	0	0	0	0	0
Solyc00g011140	0		0	0	0	0	0	0	0	0	0	0	0	0	0	0	0	0	0	0	0	0	0	0	0	0	0	0	0	0	0	0	0	0	0	0	0	0	0	0	0	0	0	0	0	0	0	0	0
Solyc00g011150	0		0	0	0	0	0	0	0	0	0	0	0	0	0	0	0	0	0	0	0	0	0	0	0	0	0	0	0	0	0	0	0	0	0	0	0	0	0	0	0	0	0	0	0	0	0	0	0
Solyc00g011160	0.6375		0	0.0225	0	0	0.0275	0	0	0	0	0	0	0	0	0	0	0	0	0	0	0	0	0	0	0	0	0	0	0	0	0	0	0	0	0	0	0.0275	0	0	0	0	0	0	0	0	0.0275	0	0
Solyc00g011170	0.143333		0	0	0	0	0	0	0	0	0	0	0	0	0	0	0	0	0	0	0	0	0	0	0	0	0	0	0	0	0	0	0	0	0	0	0	0	0	0	0	0	0	0	0	0	0	0	0
Solyc00g011180	0.0175		0	0	0	0	0	0	0	0	0	0	0	0	0	0	0	0	0	0	0	0	0	0	0	0	0	0	0	0	0	0	0	0	0	0	0	0	0	0	0	0	0	0	0	0	0	0	0
Solyc00g011310	1.3225	Expressed	0	0	0	0	0	0	0	0	0	0	0	0	0	0.0275	0	0	0	0	0	0	0	0	0	0	0	0	0	0	0	0	0	0	0	0	0.025	0.05	0	0	0	0.05	0	0	0.03	0	0	0.0175	0
Solyc00g011550	18.535	Expressed	0	0	0.0825	0	0.0325	0	0	0	0.0275	0	0	0	0	0	0	0	0	0.105	0.6925	0	0	0	0	0	0	0	0	0.045	0	0.025	0	0	0	0	4.2125	0.0225	0	0	0	0	0	0	0	0	0	0	0
Solyc00g011560	0.705		0	0	0	0	0	0	0	0	0	0	0	0	0	0	0	0.0275	0	0.02	0.0325	0	0.0225	0	0	0.03	0	0	0.02	0	0	0	0	0	0	0	0.0525	0.195	0.0325	0	0	0.0275	0	0	0	0	0	0	0
Solyc00g011660	20.2375	Expressed	0	0	0.105	0	0	0	0	0	0	0	0	0	0	0	0	0	0	0.0525	0.9525	0	0	0	0	0	0	0	0	0	0	0	0	0	0	0	4.0725	0.0725	0	0	0	0	0	0	0	0	0	0	0
Solyc00g011670	0		0	0	0	0	0	0	0	0	0	0	0	0	0	0	0	0	0	0	0	0	0	0	0	0	0	0	0	0	0	0	0	0	0	0	0	0	0	0	0	0	0	0	0	0	0	0	0
Solyc00g011870	0.765		0.27	0	0	0	0	0	0	0	0	0	0	0	0	0	0	0	0	0	0	0	0	0	0	0	0	0	0	0	0	0	0	0	0	0	0.025	0.0275	0.03	0	0	0	0	0	0	0	0.0275	0.0275	0
Solyc00g011880	35.35	Expressed	29.3267	10.9075	9.4325	10.0725	8.135	6.2625	9.3925	8.7925	11.3225	10.7625	9.9625	9.035	7.185	7.2075	8.245	10.32	16.83	9.565	7.975	8.6475	4.98	5.8275	6.355	7.585	7.51	7.2325	7.6525	6.455	5.775	7.7	6.2375	6.6075	35.35	17.0533	7.7875	7.465	7.945	10.13	8.25	8.4425	7.8475	7.2525	9.1725	7.535	8.885	7.6175	8.4625
Solyc00g011890	305.66	Expressed	35.35	39.36	50.3175	60.75	103.802	97.0625	103.585	110.662	189.393	191.6	186.53	245.928	272.762	288.26	238.137	252.28	38.0367	50.055	40.8925	84.3975	112.375	108.415	97.8475	118.015	262.368	263.57	261.723	234.54	260.358	240.548	227.373	278.125	32.44	14.2567	58.915	123.415	131.482	185.632	199.963	171.808	222.085	231.738	242.41	262.913	261.632	220.33	224.923
Solyc00g012090	0		0	0	0	0	0	0	0	0	0	0	0	0	0	0	0	0	0	0	0	0	0	0	0	0	0	0	0	0	0	0	0	0	0	0	0	0	0	0	0	0	0	0	0	0	0	0	0
Solyc00g012310	0.035		0	0	0	0	0	0	0.035	0	0	0	0	0	0	0	0	0	0	0	0	0	0	0	0	0	0	0	0	0	0	0	0	0	0	0	0	0	0	0	0	0	0	0	0	0	0	0	0
Solyc00g012430	0		0	0	0	0	0	0	0	0	0	0	0	0	0	0	0	0	0	0	0	0	0	0	0	0	0	0	0	0	0	0	0	0	0	0	0	0	0	0	0	0	0	0	0	0	0	0	0
Solyc00g012440	0.275		0	0	0	0	0	0	0	0	0	0	0	0	0	0	0	0	0	0	0	0	0	0	0	0	0	0	0	0	0	0	0	0	0	0	0	0	0	0	0	0	0	0	0	0	0	0	0
Solyc00g012540	0.4925		0	0	0	0	0	0	0	0	0	0	0	0	0	0	0	0	0	0	0	0.025	0	0	0	0	0	0	0	0	0	0	0	0	0	0	0.1975	0.0575	0	0	0	0	0	0	0	0	0	0	0
Solyc00g012640	0.0333333		0	0	0	0	0	0	0	0	0	0	0	0	0	0	0	0	0	0	0	0	0	0	0	0	0	0	0	0	0	0	0	0	0	0	0	0	0	0	0	0	0	0	0	0	0	0	0
Solyc00g012650	0		0	0	0	0	0	0	0	0	0	0	0	0	0	0	0	0	0	0	0	0	0	0	0	0	0	0	0	0	0	0	0	0	0	0	0	0	0	0	0	0	0	0	0	0	0	0	0
Solyc00g012660	0		0	0	0	0	0	0	0	0	0	0	0	0	0	0	0	0	0	0	0	0	0	0	0	0	0	0	0	0	0	0	0	0	0	0	0	0	0	0	0	0	0	0	0	0	0	0	0
Solyc00g012670	0		0	0	0	0	0	0	0	0	0	0	0	0	0	0	0	0	0	0	0	0	0	0	0	0	0	0	0	0	0	0	0	0	0	0	0	0	0	0	0	0	0	0	0	0	0	0	0
Solyc00g012680	0		0	0	0	0	0	0	0	0	0	0	0	0	0	0	0	0	0	0	0	0	0	0	0	0	0	0	0	0	0	0	0	0	0	0	0	0	0	0	0	0	0	0	0	0	0	0	0
Solyc00g012690	0		0	0	0	0	0	0	0	0	0	0	0	0	0	0	0	0	0	0	0	0	0	0	0	0	0	0	0	0	0	0	0	0	0	0	0	0	0	0	0	0	0	0	0	0	0	0	0
Solyc00g012700	0		0	0	0	0	0	0	0	0	0	0	0	0	0	0	0	0	0	0	0	0	0	0	0	0	0	0	0	0	0	0	0	0	0	0	0	0	0	0	0	0	0	0	0	0	0	0	0
Solyc00g012800	0.1075		0	0	0	0	0	0	0	0	0	0	0	0	0	0	0	0	0	0	0	0	0	0	0	0	0	0	0	0	0	0	0	0	0	0	0	0	0	0	0	0	0	0	0	0	0	0	0
Solyc00g012900	0.0675		0	0	0	0	0	0	0	0	0	0	0	0	0	0	0	0	0	0	0	0	0	0	0	0	0	0	0	0	0	0	0	0	0	0	0	0	0	0	0	0	0	0	0	0	0	0	0
Solyc00g013000	0.0575		0	0	0.0575	0	0	0	0	0	0	0	0	0	0	0	0	0	0	0.02	0	0	0	0	0	0	0	0	0	0	0	0	0	0	0	0	0	0.0275	0	0	0	0	0	0	0	0	0	0	0
Solyc00g013100	0.675		0	0.02	0	0	0	0	0	0	0	0	0	0	0	0	0	0.0275	0	0.02	0	0.025	0	0	0	0.03	0	0.0525	0	0	0	0	0	0	0.03	0	0	0.0275	0	0	0.05	0	0	0	0.0525	0.0225	0.035	0	0.02
Solyc00g013110	0.4925		0	0	0	0	0	0	0	0	0	0	0	0.0225	0	0	0.03	0	0	0.0725	0	0.0775	0	0	0	0	0	0	0	0.02	0	0	0	0	0	0	0	0	0	0	0	0	0	0.0325	0.025	0	0	0	0.0225
Solyc00g013120	10.3125	Expressed	0	0.6975	1.205	0.5175	1.79	2.83	3.24	2.64	2.47	2.325	2.6425	2.3825	1.9975	2.0375	1.9025	2.1325	0.0333333	1.4825	2.785	2.855	2.725	2.0975	2.32	2.5725	3.065	2.6825	2.2325	2.1	2.2525	1.91	1.0325	1.98	0.0533333	0.406667	3.2725	4.4475	3.97	3.16	5.39	3.915	1.7725	2.14	1.835	1.05	0.5975	1.01	0.525
Solyc00g013130	39.9825	Expressed	4.38	4.02	5.805	5.24	6.5125	9.7475	9.5575	7.54	8.29	8.0725	9.86	6.915	7.175	5.895	6.435	7.07	0.133333	7.8925	14.825	13.43	11.375	6.905	9.125	8.88	8.9375	8.73	9.1875	6.1575	6.7075	5.64	4.345	6.07	5.59	4.15	13.9075	14.6825	13.8425	10.185	15.145	11.9175	5.6725	8.3075	7.07	4.165	4.2575	3.8925	2.93
Solyc00g013140	27.28	Expressed	0.293333	2.99	2.925	3.6525	1.75	1.4375	2.17	1.9625	2.06	1.8325	2.53	1.63	2.5475	2.4325	2.345	2.3925	0.1	6.785	4.3	3.16	2.19	1.5725	2.07	2.03	1.425	2.44	1.7225	2.2525	2.1675	2.3375	1.445	2.21	0.76	1.20333	2.375	2.8475	2.335	1.05	2.195	1.685	1.5825	2.615	2.1625	2.075	2.385	1.3575	1.3375
Solyc00g013150	0.7475		0.23	0.0725	0.0525	0	0.09	0	0.0675	0.0275	0.055	0	0	0	0.0225	0	0	0.05	0	0.0425	0	0.1375	0.025	0	0	0.0575	0	0	0.02	0	0.02	0.08	0	0.0725	0.0866667	0	0.0175	0	0	0	0.045	0	0.0275	0.03	0.025	0	0.035	0	0.0225
Solyc00g013160	15.7225	Expressed	0.4	1.03	1.2775	0.6925	1.5675	2.5975	2.855	2.5475	3.5025	3.8275	4.4775	3.0175	3.4125	3.0175	2.4525	2.6175	0	1.5075	2.0625	1.1225	1.0825	1.765	2.17	2.145	3.8725	3.995	4.97	3.1675	3.88	2.5875	2.415	3.055	0.56	0.563333	2.28	3.5775	5.2225	3.8425	4.3975	5.4575	5.9525	8.5375	6.6125	3.3525	3.1875	2.985	1.5175
Solyc00g013170	1	Expressed	0.03	0	0	0	0.025	0.0225	0	0	0	0	0	0.0225	0	0.0225	0	0	0	0	0	0.025	0	0	0.035	0	0	0	0	0	0.065	0	0	0.025	0	0.106667	0	0	0	0	0.025	0	0	0	0.135	0.0225	0.055	0.0225	0
Solyc00g013180	27.285	Expressed	1.49333	1.5725	1.405	1.66	2.305	2.905	3.54	3.05	4.1525	3.4425	4.335	3.44	3.565	2.825	2.79	3.2275	0	3.0725	1.8225	2.0725	1.3475	1.8075	2.2275	2.7675	3.8125	4.4	4.325	3.3025	3.67	2.575	2.2175	2.5875	0.31	0.676667	2.355	4.0525	3.79	3.7125	5.4775	4.04	6.1125	8.3475	7.685	2.8075	3.185	2.945	1.8225
Solyc00g013190	16.4725	Expressed	0	0.605	0.49	0.9975	0.1875	0.095	0.035	0.1225	0.095	0.0325	0.0525	0.0475	0.0675	0.155	0.1	0.27	0	1.82	0.715	0.27	0.4	0.1775	0.1475	0.215	0.2325	0.045	0.075	0.0425	0.0475	0	0.0575	0.1125	0.323333	1.62333	0.335	0.4825	0.2225	0.085	0.195	0.19	0.095	0.03	0.28	0.0975	0.37	0.095	0.1775
Solyc00g013320	0		0	0	0	0	0	0	0	0	0	0	0	0	0	0	0	0	0	0	0	0	0	0	0	0	0	0	0	0	0	0	0	0	0	0	0	0	0	0	0	0	0	0	0	0	0	0	0
Solyc00g013330	0.52		0	0	0	0	0	0	0	0	0	0	0	0	0	0	0	0	0	0	0	0	0	0	0	0	0	0	0	0	0	0	0	0	0	0	0	0	0	0	0	0	0.025	0	0	0	0	0	0
Solyc00g013770	0		0	0	0	0	0	0	0	0	0	0	0	0	0	0	0	0	0	0	0	0	0	0	0	0	0	0	0	0	0	0	0	0	0	0	0	0	0	0	0	0	0	0	0	0	0	0	0
Solyc00g014170	0.0625		0	0	0	0	0	0	0	0	0	0	0	0	0	0	0	0	0	0	0	0	0	0	0	0	0	0	0	0	0	0	0	0	0	0	0	0	0	0	0	0	0	0	0.0625	0	0	0	0
Solyc00g014180	0.11		0	0	0	0	0	0	0	0	0	0	0	0	0	0	0	0	0	0	0	0	0	0	0	0	0	0	0	0	0	0	0	0	0	0	0	0	0	0	0	0	0	0	0.0875	0	0.0275	0	0
Solyc00g014190	0.0325		0	0	0	0	0	0	0	0	0	0	0	0	0	0	0	0	0	0	0	0	0	0	0	0	0	0	0	0	0	0	0	0	0	0	0	0	0	0	0	0	0	0	0	0	0	0	0
Solyc00g014290	0.045		0	0	0	0	0	0	0	0	0	0	0	0	0	0	0	0	0	0	0	0	0	0	0	0	0	0	0	0	0	0	0	0	0	0	0	0	0	0	0	0	0	0	0	0	0	0	0
Solyc00g014390	3.4475	Expressed	0	0.0225	0	0	0	0	0	0	0	0	0	0	0	0	0	0	0	0	0.0725	0.08	0	0	0	0	0	0	0	0	0	0	0	0	0	0	0.335	0.315	0	0	0	0	0	0	0	0	0	0	0
Solyc00g014790	24.27	Expressed	4.39333	0.7275	0.4475	0.325	0.48	0.5675	0.3325	0.26	0.2825	0.28	0.1375	0.07	0.23	0.1675	0.165	0.655	2.49	1.385	0.755	0.9525	0.6125	0.42	0.6125	0.4125	0.19	0.4575	0.3675	0.38	0.1775	0.2675	0.2275	0.8575	16.4867	6.85667	0.915	0.4775	0.84	0.5075	0.9825	0.4625	0.315	0.5125	0.7275	0.4825	0.6	0.12	0.5975
Solyc00g014800	2.48667	Expressed	0.493333	0.23	0.29	0.0725	0.0575	0.095	0.185	0.0875	0.16	0.0575	0.075	0.095	0.03	0.08	0.07	0.05	0	0.2125	0.1375	0	0.06	0.15	0.1525	0.0875	0.2075	0.0825	0.2775	0.13	0.125	0.075	0.13	0.1925	0.0866667	0	0.335	0.16	0.295	0.13	0.125	0.17	0.13	0.3025	0.2175	0.17	0.1625	0.06	0.125
Solyc00g014810	1.1025	Expressed	0	0.0325	0.025	0	0	0	0	0.0275	0	0.0325	0.0825	0	0.0225	0	0	0	0	0	0.0225	0.075	0	0	0	0	0	0.045	0	0.0225	0	0	0.0225	0.0125	0	0	0.0425	0.0275	0.0325	0.0475	0.2	0.0325	0	0.025	0.0525	0.045	0.0325	0	0.025
Solyc00g014820	2.22	Expressed	0	0.0225	0.025	0.0275	0.09	0.0225	0.0775	0.085	0.0275	0	0.0225	0	0	0	0	0.13	0	0.1575	0.0275	0.22	0.1075	0.03	0.03	0.03	0.0675	0.025	0	0.0625	0.035	0	0.045	0.12	0.06	0	0.06	0.03	0.065	0.0475	0.1	0.0525	0.0275	0.025	0.175	0.065	0.125	0.065	0.085
Solyc00g014830	64.75	Expressed	6.59333	8.405	10.55	6.0325	6.1875	6.2	6.0725	4.7675	5.4125	5.48	5.6325	5.0925	4.895	4.99	6.33	5.85	0.263333	15.2425	17.86	13.6	9.4825	3.795	7.865	5.1325	5.225	5.5975	5.6325	4.7875	5.9375	4.72	4.3725	5.285	3.02333	3.37333	15.5825	15.185	12.3525	8.35	12.64	10.715	7.6075	9.8775	8.6775	5.0225	5.9075	5.02	3.16
Solyc00g014840	1.145	Expressed	0.156667	0.0225	0	0	0	0	0	0	0.0275	0	0	0.0225	0.0225	0	0	0	0	0	0.0325	0	0	0	0	0	0	0	0	0	0	0	0.0625	0	0.03	0.0766667	0.0425	0	0	0	0.0725	0	0	0	0.155	0	0.09	0	0
Solyc00g014850	18.0675	Expressed	0.03	3.23	0.9375	2.07	0.195	0.2225	0.1375	0.1375	0.1575	0.2225	0.2375	0.23	0.245	0.2875	0.3025	0.215	0	7.3525	1.1	0.495	0.5625	0.1775	0.4025	0.2975	0.2525	0.1025	0.1825	0.1925	0.215	0.2075	0.1375	0.42	0.0533333	0.21	1.3075	0.605	0.295	0.1125	0.2325	0.305	0.4775	0.1325	0.34	0.345	0.5	0.1	0.5125
Solyc00g014860	9.8775	Expressed	0	1.1275	0.5375	1.065	0.09	0.0725	0.09	0.08	0.14	0.145	0.1525	0.185	0.1775	0.17	0.23	0.115	0	3.4075	0.525	0.2825	0.3825	0.1175	0.225	0.27	0.245	0.13	0.1825	0.1075	0.205	0.1825	0.0275	0.32	0	0.113333	0.7625	0.435	0.1975	0.0225	0.185	0.12	0.2675	0.0275	0.29	0.27	0.2925	0.1075	0.3075
Solyc00g014960	0		0	0	0	0	0	0	0	0	0	0	0	0	0	0	0	0	0	0	0	0	0	0	0	0	0	0	0	0	0	0	0	0	0	0	0	0	0	0	0	0	0	0	0	0	0	0	0
Solyc00g014970	0		0	0	0	0	0	0	0	0	0	0	0	0	0	0	0	0	0	0	0	0	0	0	0	0	0	0	0	0	0	0	0	0	0	0	0	0	0	0	0	0	0	0	0	0	0	0	0
Solyc00g014980	0		0	0	0	0	0	0	0	0	0	0	0	0	0	0	0	0	0	0	0	0	0	0	0	0	0	0	0	0	0	0	0	0	0	0	0	0	0	0	0	0	0	0	0	0	0	0	0
Solyc00g014990	0		0	0	0	0	0	0	0	0	0	0	0	0	0	0	0	0	0	0	0	0	0	0	0	0	0	0	0	0	0	0	0	0	0	0	0	0	0	0	0	0	0	0	0	0	0	0	0
Solyc00g015000	0		0	0	0	0	0	0	0	0	0	0	0	0	0	0	0	0	0	0	0	0	0	0	0	0	0	0	0	0	0	0	0	0	0	0	0	0	0	0	0	0	0	0	0	0	0	0	0
Solyc00g015600	0.143333		0	0	0	0	0	0	0	0	0	0	0	0	0	0	0	0	0	0	0	0	0	0	0	0	0	0	0	0	0	0	0	0	0.143333	0	0	0	0	0	0	0	0	0	0	0	0	0	0
Solyc00g015610	0.045		0	0	0	0	0	0	0	0	0	0	0	0	0	0	0	0	0	0	0	0	0	0	0	0	0	0	0	0	0	0	0	0	0	0	0	0	0	0	0	0	0	0	0	0	0	0	0
Solyc00g015720	0		0	0	0	0	0	0	0	0	0	0	0	0	0	0	0	0	0	0	0	0	0	0	0	0	0	0	0	0	0	0	0	0	0	0	0	0	0	0	0	0	0	0	0	0	0	0	0
Solyc00g015730	0		0	0	0	0	0	0	0	0	0	0	0	0	0	0	0	0	0	0	0	0	0	0	0	0	0	0	0	0	0	0	0	0	0	0	0	0	0	0	0	0	0	0	0	0	0	0	0
Solyc00g015740	0.0475		0	0	0	0.0475	0	0	0	0	0	0	0	0	0	0	0	0	0	0	0	0	0	0	0	0	0	0	0	0	0	0	0	0	0	0	0	0	0	0	0	0	0	0	0	0	0	0	0
Solyc00g015750	0		0	0	0	0	0	0	0	0	0	0	0	0	0	0	0	0	0	0	0	0	0	0	0	0	0	0	0	0	0	0	0	0	0	0	0	0	0	0	0	0	0	0	0	0	0	0	0
Solyc00g015760	0		0	0	0	0	0	0	0	0	0	0	0	0	0	0	0	0	0	0	0	0	0	0	0	0	0	0	0	0	0	0	0	0	0	0	0	0	0	0	0	0	0	0	0	0	0	0	0
Solyc00g015770	0.09		0	0	0	0	0	0	0	0	0	0	0	0	0	0	0	0	0	0	0	0	0	0	0	0	0	0	0	0	0	0	0	0	0	0	0	0	0	0	0	0	0	0	0	0	0	0	0
Solyc00g016470	0		0	0	0	0	0	0	0	0	0	0	0	0	0	0	0	0	0	0	0	0	0	0	0	0	0	0	0	0	0	0	0	0	0	0	0	0	0	0	0	0	0	0	0	0	0	0	0
Solyc00g016480	0		0	0	0	0	0	0	0	0	0	0	0	0	0	0	0	0	0	0	0	0	0	0	0	0	0	0	0	0	0	0	0	0	0	0	0	0	0	0	0	0	0	0	0	0	0	0	0
Solyc00g016490	0		0	0	0	0	0	0	0	0	0	0	0	0	0	0	0	0	0	0	0	0	0	0	0	0	0	0	0	0	0	0	0	0	0	0	0	0	0	0	0	0	0	0	0	0	0	0	0
Solyc00g016590	0.0275		0	0	0	0	0	0	0	0	0	0	0	0	0	0	0	0	0	0	0	0	0	0	0	0	0	0	0	0	0	0	0	0	0	0	0	0	0	0	0	0	0	0	0	0	0	0	0
Solyc00g016790	0.0925		0	0	0	0	0	0	0	0	0	0	0	0	0	0	0	0	0	0	0	0	0	0	0	0	0	0	0	0	0	0	0	0	0	0	0	0	0	0	0	0	0	0	0.03	0	0	0	0
Solyc00g016890	0		0	0	0	0	0	0	0	0	0	0	0	0	0	0	0	0	0	0	0	0	0	0	0	0	0	0	0	0	0	0	0	0	0	0	0	0	0	0	0	0	0	0	0	0	0	0	0
Solyc00g016900	0		0	0	0	0	0	0	0	0	0	0	0	0	0	0	0	0	0	0	0	0	0	0	0	0	0	0	0	0	0	0	0	0	0	0	0	0	0	0	0	0	0	0	0	0	0	0	0
Solyc00g016910	0		0	0	0	0	0	0	0	0	0	0	0	0	0	0	0	0	0	0	0	0	0	0	0	0	0	0	0	0	0	0	0	0	0	0	0	0	0	0	0	0	0	0	0	0	0	0	0
Solyc00g017210	0.09		0	0	0	0.045	0	0	0	0	0	0	0	0	0	0	0	0	0.09	0	0	0	0	0	0	0	0	0	0	0	0	0	0	0	0	0	0	0	0	0	0	0	0	0	0	0	0	0	0
Solyc00g017220	0.2075		0	0.0425	0	0	0	0	0	0	0	0	0	0	0	0	0	0	0	0.02	0	0	0	0	0	0	0	0	0	0	0	0	0	0	0	0	0	0	0	0	0	0	0	0	0	0	0	0	0
Solyc00g017230	0.17		0	0	0	0.025	0	0	0	0	0	0	0	0	0	0	0	0	0	0	0	0	0	0	0	0	0	0.015	0	0	0	0	0	0	0	0	0	0	0	0	0	0	0	0	0	0	0	0	0
Solyc00g017530	0.155		0	0.0725	0	0.0975	0	0	0	0	0	0	0.0225	0	0	0	0	0	0	0.07	0.105	0	0	0	0	0	0	0	0	0	0	0.02	0	0	0	0	0.0525	0	0	0	0.0275	0	0	0	0	0	0	0	0
Solyc00g017540	0.7225		0	0	0	0.025	0.025	0	0	0	0	0	0	0	0	0	0	0	0	0.0325	0.05	0.0275	0	0	0	0	0	0	0	0	0	0	0	0	0	0	0.1675	0.2075	0.065	0.025	0	0	0	0	0.025	0	0	0	0
Solyc00g017550	0.755		0	0	0	0	0	0	0	0	0	0	0	0	0	0	0	0	0	0	0.0225	0	0	0	0	0	0	0	0	0	0	0	0	0	0	0	0.1425	0.1025	0.0325	0	0	0	0	0	0	0	0	0	0
Solyc00g017750	0.0675		0	0	0	0	0	0	0	0	0	0	0	0	0	0	0	0	0	0	0	0	0	0	0	0	0	0	0	0	0	0	0	0	0	0	0	0	0	0	0	0	0	0	0	0	0.0325	0	0
Solyc00g017760	0.4075		0	0.0425	0	0	0	0	0	0	0	0	0	0	0	0	0	0	0	0	0	0	0	0	0	0	0	0	0	0	0	0	0	0	0	0	0	0	0	0	0	0	0	0	0.0625	0	0	0	0
Solyc00g017860	0		0	0	0	0	0	0	0	0	0	0	0	0	0	0	0	0	0	0	0	0	0	0	0	0	0	0	0	0	0	0	0	0	0	0	0	0	0	0	0	0	0	0	0	0	0	0	0
Solyc00g017870	0		0	0	0	0	0	0	0	0	0	0	0	0	0	0	0	0	0	0	0	0	0	0	0	0	0	0	0	0	0	0	0	0	0	0	0	0	0	0	0	0	0	0	0	0	0	0	0
Solyc00g017880	0.0333333		0	0	0	0	0	0	0	0	0	0	0	0	0	0	0	0	0	0	0	0	0	0	0	0	0	0	0	0	0	0	0	0	0	0	0	0	0	0	0	0	0	0	0	0	0	0	0
Solyc00g017890	0		0	0	0	0	0	0	0	0	0	0	0	0	0	0	0	0	0	0	0	0	0	0	0	0	0	0	0	0	0	0	0	0	0	0	0	0	0	0	0	0	0	0	0	0	0	0	0
Solyc00g017900	0		0	0	0	0	0	0	0	0	0	0	0	0	0	0	0	0	0	0	0	0	0	0	0	0	0	0	0	0	0	0	0	0	0	0	0	0	0	0	0	0	0	0	0	0	0	0	0
Solyc00g017910	0		0	0	0	0	0	0	0	0	0	0	0	0	0	0	0	0	0	0	0	0	0	0	0	0	0	0	0	0	0	0	0	0	0	0	0	0	0	0	0	0	0	0	0	0	0	0	0
Solyc00g017920	0.0275		0	0	0	0	0	0	0	0	0	0	0	0	0	0	0	0	0	0	0	0	0	0	0	0	0	0	0	0	0	0	0	0	0	0	0	0	0	0	0	0	0	0	0	0	0	0	0
Solyc00g017930	0.0475		0	0	0	0	0	0	0	0	0	0	0	0	0	0	0	0	0	0	0	0	0	0	0	0	0	0	0	0	0	0	0	0	0	0	0	0	0	0	0	0	0	0	0	0	0	0	0
Solyc00g018760	0		0	0	0	0	0	0	0	0	0	0	0	0	0	0	0	0	0	0	0	0	0	0	0	0	0	0	0	0	0	0	0	0	0	0	0	0	0	0	0	0	0	0	0	0	0	0	0
Solyc00g018770	0		0	0	0	0	0	0	0	0	0	0	0	0	0	0	0	0	0	0	0	0	0	0	0	0	0	0	0	0	0	0	0	0	0	0	0	0	0	0	0	0	0	0	0	0	0	0	0
Solyc00g018970	0.0433333		0	0	0	0	0	0	0	0	0	0	0	0	0	0	0	0	0	0	0	0	0	0	0	0	0	0	0	0	0	0	0	0	0	0	0	0	0	0	0	0	0	0	0	0	0.0275	0	0
Solyc00g019610	0		0	0	0	0	0	0	0	0	0	0	0	0	0	0	0	0	0	0	0	0	0	0	0	0	0	0	0	0	0	0	0	0	0	0	0	0	0	0	0	0	0	0	0	0	0	0	0
Solyc00g019620	0		0	0	0	0	0	0	0	0	0	0	0	0	0	0	0	0	0	0	0	0	0	0	0	0	0	0	0	0	0	0	0	0	0	0	0	0	0	0	0	0	0	0	0	0	0	0	0
Solyc00g019630	0		0	0	0	0	0	0	0	0	0	0	0	0	0	0	0	0	0	0	0	0	0	0	0	0	0	0	0	0	0	0	0	0	0	0	0	0	0	0	0	0	0	0	0	0	0	0	0
Solyc00g019730	12.995	Expressed	0.04	1.2475	0.445	1.0225	0.28	0.22	0.15	0.0825	0.1375	0.3025	0.285	0.185	0.2175	0.0525	0.2075	0.53	0.0333333	1.91	0.6075	0.3725	0.1875	0.155	0.245	0.2525	0.14	0.135	0.1025	0.0425	0.065	0.2625	0.14	0.285	0.03	0	0.7025	0.2675	0.4525	0.61	0.77	0.9125	0.3475	0.5825	0.26	0.1925	0.22	0.13	0.415
Solyc00g019740	133.377	Expressed	0.07	7.385	4.525	7.69	1.7425	1.9825	1.52	1.8425	1.385	2.3325	1.51	1.0075	1.405	0.8675	2.05	2.71	0.0666667	15.8325	4.76	2.88	2.2075	1.35	1.6075	2.2325	1.0425	1.03	1.27	0.6975	0.7975	1.0375	1.03	1.785	0.116667	0	4.7325	2.12	2.0375	1.3225	2.93	1.235	0.9875	1.4225	1.585	1.215	1.3025	0.895	1.555
Solyc00g019750	76.87	Expressed	0.24	6.2275	2.9775	5.54	1.4275	1.2425	0.7575	0.8325	0.8675	0.8975	0.6475	0.6925	0.755	0.425	0.785	1.295	0.0666667	13.4225	3.31	1.965	1.1325	0.8975	0.54	1.3225	0.665	0.5775	0.7525	0.365	0.65	0.4775	0.6425	1.475	2.07667	1.44	4.0625	2.19	1.265	0.8125	1.845	0.6775	0.55	0.8575	1.12	0.665	0.81	0.5725	0.7425
Solyc00g019950	17.265	Expressed	0.04	1.075	0.3925	0.8425	0.195	0.1325	0.105	0.17	0.1825	0.145	0.0225	0.07	0.1125	0.0625	0.2325	0.4475	0.276667	2.9175	0.3325	0.2875	0.1425	0.09	0.1475	0.06	0.1275	0.0775	0.1625	0.1275	0.0625	0.125	0.135	0.18	1.17	0.16	0.4075	0.135	0.095	0.1075	0.2575	0.2	0.05	0.1075	0.37	0.065	0.36	0.2225	0.1325
Solyc00g019960	1.0025	Expressed	0.04	0	0.025	0	0	0.0525	0	0.0275	0	0.0325	0	0	0.0225	0	0.025	0.0575	0.0633333	0	0	0	0.0225	0	0	0	0.035	0.025	0	0.045	0.0325	0	0	0.0325	0.483333	0.0366667	0.0525	0	0	0.0525	0.0775	0	0	0	0.145	0	0.1575	0	0.0375
Solyc00g019970	3.95333	Expressed	0.04	0.0425	0.025	0	0.0525	0.0525	0	0.0275	0.0275	0.0325	0.0525	0.0475	0.045	0.0275	0.025	0.0875	0.0933333	0	0	0	0.055	0	0.0325	0	0.035	0.0825	0.05	0.045	0.0325	0	0	0.0825	0.116667	0.163333	0.0875	0	0	0.0525	0.1075	0.0275	0	0	0.1725	0	0.0975	0.025	0.0625
Solyc00g019980	2.3375	Expressed	0.0933333	0.135	0.2	0.2225	0.11	0.1275	0.0475	0.1175	0.125	0.0325	0.0825	0.045	0.075	0.0275	0.075	0.19	0	0.4075	0.415	0.6025	0.09	0.06	0.125	0.0875	0	0.0625	0.06	0.0425	0.0275	0.02	0.0275	0.0625	0	0.0766667	0.37	0.335	0.0625	0.0475	0.1025	0.1675	0.03	0.1825	0.225	0.1075	0.0675	0.0275	0.06
Solyc00g019990	1.155	Expressed	0.156667	0.0775	0.0975	0.0725	0.0525	0	0.0225	0.06	0.1	0	0.06	0.0225	0	0	0.0225	0.0875	0	0.2775	0.1275	0.0525	0.0325	0.03	0.03	0.03	0.025	0.0475	0.035	0.02	0	0.0425	0	0.0375	0.0533333	0.203333	0.11	0.065	0.03	0.0425	0.0525	0	0.03	0	0.1075	0.0425	0	0.0275	0.06
Solyc00g020000	1.645	Expressed	0.106667	0.0675	0.025	0	0	0.0425	0	0.0325	0.0225	0	0.0225	0.0475	0	0.0225	0.0925	0.08	0.19	0.1925	0	0	0	0	0.0325	0	0.07	0	0.045	0.045	0.0675	0.085	0.0525	0.15	0.2	0.296667	0	0.0575	0	0	0.1425	0.0525	0.025	0.0275	0.2825	0	0.22	0.025	0.0475
Solyc00g020010	11.2375	Expressed	4.54667	1.1575	1.1175	1.22	1.015	1.265	1.095	0.8625	1.025	0.84	0.8475	0.875	1.055	1.1225	1.93	3.3025	7.17667	2.005	3.065	1.925	0.9225	0.76	0.885	0.625	1.335	1.265	1.905	1.4225	1.57	1.275	1.7575	3.215	3.92333	5.66333	1.125	0.8125	1.165	0.335	1.045	0.72	1.18	1.9025	1.5325	2.375	1.695	1.83	2.2575
Solyc00g020020	6.21667	Expressed	0.77	0.3	0.0725	0.2025	0.025	0	0.0325	0.0925	0.05	0.0325	0	0.0925	0	0.065	0.085	0.1125	0.03	0.925	0.225	0.025	0	0.03	0.03	0.0325	0	0.0525	0	0.0425	0.095	0.0575	0.0575	0.1025	0.0866667	0.21	0.1975	0.165	0.0325	0.04	0.0475	0.02	0	0.025	0.27	0.055	0.2525	0	0.0225
Solyc00g020030	6.53	Expressed	4.48333	0.5875	0.745	0.8275	0.1575	0.245	0.4575	0.1175	0.42	0.2025	0.1925	0.39	0.3125	0.0225	0.51	1.2	0	1.6075	0.7575	0.3725	0.23	0.2175	0.33	0.4	0.38	0.3775	0.2625	0.6225	0.4275	0.3775	0.4825	0.86	2.46667	0.223333	0.47	0.2925	0.2575	0.155	0.1825	0.16	0.7225	0.8	0.5725	1.365	1.0325	0.9875	0.9425
Solyc00g020040	0.8375		0	0.02	0.11	0.13	0	0	0.0225	0	0.055	0.065	0	0.115	0.0275	0.03	0.0925	0.03	0	0.25	0.0325	0.0525	0	0.03	0	0	0	0.025	0.02	0.0425	0	0.02	0.0225	0.1125	0	0	0.06	0.03	0	0	0.05	0.0225	0.0875	0.0325	0.05	0.0225	0.07	0.0175	0.0225
Solyc00g020440	0.045		0	0	0	0	0	0	0	0	0	0	0	0	0	0	0	0	0	0	0	0	0	0	0	0	0	0	0	0	0	0	0	0	0	0	0	0	0	0	0	0	0	0	0	0	0	0	0
Solyc00g020540	1.12333	Expressed	0	0	0	0.0275	0	0.0525	0	0	0.0275	0	0	0	0	0	0	0	0	0.11	0	0	0	0	0	0	0	0	0	0	0	0	0	0	0	0	0.0725	0	0	0	0	0	0	0	0	0	0.0275	0	0
Solyc00g020840	0.3		0.04	0	0	0	0	0	0	0	0	0	0	0.0225	0.0225	0	0.025	0.0575	0	0	0	0.05	0.0325	0	0	0.0575	0	0.03	0.02	0.0225	0.0325	0.0275	0	0.06	0	0	0	0.0275	0.03	0.0475	0.0525	0	0.0825	0.17	0.155	0.0875	0.1325	0.055	0.245
Solyc00g020940	0		0	0	0	0	0	0	0	0	0	0	0	0	0	0	0	0	0	0	0	0	0	0	0	0	0	0	0	0	0	0	0	0	0	0	0	0	0	0	0	0	0	0	0	0	0	0	0
Solyc00g020950	0		0	0	0	0	0	0	0	0	0	0	0	0	0	0	0	0	0	0	0	0	0	0	0	0	0	0	0	0	0	0	0	0	0	0	0	0	0	0	0	0	0	0	0	0	0	0	0
Solyc00g020960	0		0	0	0	0	0	0	0	0	0	0	0	0	0	0	0	0	0	0	0	0	0	0	0	0	0	0	0	0	0	0	0	0	0	0	0	0	0	0	0	0	0	0	0	0	0	0	0
Solyc00g020970	0		0	0	0	0	0	0	0	0	0	0	0	0	0	0	0	0	0	0	0	0	0	0	0	0	0	0	0	0	0	0	0	0	0	0	0	0	0	0	0	0	0	0	0	0	0	0	0
Solyc00g020980	0		0	0	0	0	0	0	0	0	0	0	0	0	0	0	0	0	0	0	0	0	0	0	0	0	0	0	0	0	0	0	0	0	0	0	0	0	0	0	0	0	0	0	0	0	0	0	0
Solyc00g020990	0.03		0	0	0	0	0	0	0	0	0	0	0	0	0	0	0	0	0	0	0	0	0	0	0	0	0	0	0	0	0	0	0	0	0	0	0	0	0	0	0	0.0275	0	0	0	0	0	0	0
Solyc00g021490	0.0225		0	0	0	0	0	0	0	0	0	0	0	0	0	0	0	0	0	0	0	0	0	0	0	0	0	0	0	0	0	0	0	0	0	0	0	0	0	0	0	0	0	0	0	0	0	0	0
Solyc00g021500	0		0	0	0	0	0	0	0	0	0	0	0	0	0	0	0	0	0	0	0	0	0	0	0	0	0	0	0	0	0	0	0	0	0	0	0	0	0	0	0	0	0	0	0	0	0	0	0
Solyc00g021510	0		0	0	0	0	0	0	0	0	0	0	0	0	0	0	0	0	0	0	0	0	0	0	0	0	0	0	0	0	0	0	0	0	0	0	0	0	0	0	0	0	0	0	0	0	0	0	0
Solyc00g021520	0		0	0	0	0	0	0	0	0	0	0	0	0	0	0	0	0	0	0	0	0	0	0	0	0	0	0	0	0	0	0	0	0	0	0	0	0	0	0	0	0	0	0	0	0	0	0	0
Solyc00g021530	0		0	0	0	0	0	0	0	0	0	0	0	0	0	0	0	0	0	0	0	0	0	0	0	0	0	0	0	0	0	0	0	0	0	0	0	0	0	0	0	0	0	0	0	0	0	0	0
Solyc00g021630	19.81	Expressed	0	1.5775	0.29	0.83	0.1625	0.205	0.2875	0.1775	0.13	0.2175	0.17	0.255	0.1525	0.2325	0.3125	0.33	0	2.62	0.22	0.29	0.1925	0.2075	0.2775	0.1475	0.2275	0.075	0.265	0.1075	0.1925	0.2975	0.2825	0.29	0.163333	0	0.405	0.5075	0.6425	0.355	0.6925	0.3275	0.2325	0.25	0.4125	0.3225	0.29	0.215	0.2075
Solyc00g021640	110.965	Expressed	8.27333	3.78	2.295	4.285	0.6125	0.6625	0.5525	0.4925	0.78	0.7925	0.655	0.4575	0.5875	0.6625	0.95	1.61	1.78	8.87	2.3025	1.05	0.825	0.5075	0.9475	0.9775	0.615	0.525	0.8375	0.5925	1.2275	0.83	0.9775	2.06	44.3167	14.5967	2.895	1.755	2.6	1.3675	2.61	1.6125	0.7425	1.505	0.8875	1.4425	1.25	0.905	1.4725
Solyc00g021650	0.8675		0	0	0	0	0	0	0	0	0	0	0	0	0	0	0	0.03	0	0	0.0325	0	0	0	0	0	0	0.025	0.02	0	0	0	0	0	0.0866667	0	0.025	0.0275	0.0325	0	0	0	0	0.0275	0.03	0	0	0	0.0225
Solyc00g021660	3.04	Expressed	0	0.11	0.0225	0.0975	0.025	0.0425	0.035	0.03	0.0275	0.0325	0.0275	0	0	0.05	0.0225	0.03	0.0333333	0.185	0.0275	0	0.025	0.0625	0.085	0.025	0.035	0	0.045	0.0225	0	0.02	0.0525	0.1025	0.0233333	0.366667	0	0.0275	0.065	0.025	0.0475	0.1	0.0275	0.1125	0.125	0	0.035	0.0775	0.0375
Solyc00g022070	7.55333	Expressed	0	0.095	0.03	0.075	0.0325	0.0325	0	0.0325	0	0	0	0.0225	0.0225	0.0275	0.03	0.0225	0.03	0.1675	0	0	0.055	0	0	0	0.035	0	0	0	0.0525	0.0825	0.0575	0.085	0.0866667	0	0.1275	0	0	0	0.15	0	0	0.08	0.1325	0	0.06	0	0.0425
Solyc00g022080	1.56	Expressed	0	0.0325	0.03	0.0725	0.0325	0	0.055	0	0.0225	0	0.03	0.0225	0.0225	0	0.0475	0.0525	0	0.0425	0	0	0	0.03	0	0	0	0.015	0.025	0.02	0.0525	0.03	0.17	0.0825	0	0	0	0.0275	0.0325	0	0.0975	0	0.0275	0	0.1675	0.0225	0.16	0.0475	0.0875
Solyc00g022090	7.57333	Expressed	0.0833333	0.23	0.0725	0.1	0	0.085	0.0225	0.0275	0.0275	0.2075	0.09	0.18	0.1225	0.0225	0.105	0.38	0.03	0.345	0.0475	0.1625	0.0525	0.03	0.06	0.0975	0.1325	0.08	0.15	0.08	0.105	0.13	0.0775	0.3	0	0.0433333	0.0775	0.0575	0.13	0	0.1025	0.0275	0	0.1825	0.33	0.15	0.2575	0.12	0.1225
Solyc00g022100	35.1825	Expressed	0.0833333	0.85	0.3475	0.91	0.1725	0.485	0.59	0.66	0.7325	0.81	0.7575	0.5875	0.5475	0.5975	0.855	1.8975	2.02333	2.6375	0.66	0.58	0.6025	0.4225	0.7075	0.2525	0.5575	0.45	0.49	0.5325	0.495	0.2725	0.425	1.1125	0.0533333	0.98	0.485	0.635	0.6825	0.2225	0.8575	0.2225	0.205	0.68	0.635	1.03	0.9975	0.585	0.855
Solyc00g022110	244.502	Expressed	0.286667	7.49	5.565	7.7025	5.4925	6.41	7.1575	6.5675	8.845	8.8325	9.91	17.1725	19.755	22.45	27.2175	44.74	2.02333	15.2	9.4325	7.3975	7.33	4.0025	7.4825	6.705	10.09	12.0275	12.6925	20.5075	24.315	22.0325	22.49	38.07	0.46	2.13333	10.395	10.6425	12.83	5.85	10.4175	9.3	19.5575	22.7175	21.45	30.8525	32.4275	26.4025	22.3
Solyc00g022920	0		0	0	0	0	0	0	0	0	0	0	0	0	0	0	0	0	0	0	0	0	0	0	0	0	0	0	0	0	0	0	0	0	0	0	0	0	0	0	0	0	0	0	0	0	0	0	0
Solyc00g023020	0.0275		0	0	0	0	0	0	0	0	0	0	0	0	0	0	0	0	0	0	0	0	0	0	0	0	0	0	0	0	0	0	0	0	0	0	0	0	0	0	0	0	0	0	0	0	0	0	0
Solyc00g023030	0		0	0	0	0	0	0	0	0	0	0	0	0	0	0	0	0	0	0	0	0	0	0	0	0	0	0	0	0	0	0	0	0	0	0	0	0	0	0	0	0	0	0	0	0	0	0	0
Solyc00g023040	0		0	0	0	0	0	0	0	0	0	0	0	0	0	0	0	0	0	0	0	0	0	0	0	0	0	0	0	0	0	0	0	0	0	0	0	0	0	0	0	0	0	0	0	0	0	0	0
Solyc00g023050	0		0	0	0	0	0	0	0	0	0	0	0	0	0	0	0	0	0	0	0	0	0	0	0	0	0	0	0	0	0	0	0	0	0	0	0	0	0	0	0	0	0	0	0	0	0	0	0
Solyc00g023250	0.03		0	0	0	0	0	0	0	0	0	0	0	0	0	0	0	0	0	0	0	0	0	0	0	0	0	0	0	0	0	0	0	0	0	0	0	0	0	0	0	0	0	0	0	0	0	0	0
Solyc00g023260	0		0	0	0	0	0	0	0	0	0	0	0	0	0	0	0	0	0	0	0	0	0	0	0	0	0	0	0	0	0	0	0	0	0	0	0	0	0	0	0	0	0	0	0	0	0	0	0
Solyc00g023270	0		0	0	0	0	0	0	0	0	0	0	0	0	0	0	0	0	0	0	0	0	0	0	0	0	0	0	0	0	0	0	0	0	0	0	0	0	0	0	0	0	0	0	0	0	0	0	0
Solyc00g023470	3.16333	Expressed	0	0	0	0	0	0	0	0	0	0	0	0	0	0	0	0	0	0.0425	0	0	0	0	0	0	0	0	0	0	0	0	0	0	0	0	0.025	0.0275	0	0	0	0	0	0	0	0	0	0	0
Solyc00g023570	2.8975	Expressed	0	0	0.0225	0.0225	0	0	0	0	0	0	0	0	0.0275	0	0	0.1175	0	0.02	0.0525	0	0	0	0	0	0.035	0	0.02	0.085	0.0325	0.03	0.0575	0.06	0	0	0	0	0	0.025	0.05	0	0.05	0.0625	0.205	0.0425	0.2225	0	0.095
Solyc00g023580	1.33	Expressed	0	0	0.03	0	0	0	0	0	0	0	0	0	0	0	0	0	0.0333333	0	0	0.0275	0	0	0.0275	0	0	0.015	0.02	0	0	0.025	0	0	0	0	0	0	0	0	0.025	0	0	0	0.0625	0	0	0	0
Solyc00g023590	2.725	Expressed	0	0.1325	0.025	0	0.06	0.0225	0	0.0575	0	0.09	0.08	0.09	0.0975	0.03	0	0.0575	0.06	0.0925	0	0.0775	0.0325	0.06	0.0925	0.065	0.025	0.1075	0.16	0	0.035	0.0575	0.05	0.045	0.0233333	0	0.075	0.1925	0.065	0.02	0.1875	0.07	0.0775	0.15	0.2525	0	0.3175	0.0225	0.17
Solyc00g023600	3.18	Expressed	0.11	0.1625	0.025	0.0725	0.0325	0	0.0225	0	0.0275	0	0	0	0.045	0.05	0.0525	0.0275	0.0633333	0.1575	0.0225	0.075	0.045	0.0325	0	0	0	0.03	0.0325	0.0425	0.02	0	0.03	0.105	0.123333	0.136667	0.085	0.1775	0.295	0.1175	0.35	0.085	0.1275	0.2875	0.1125	0.065	0.13	0	0.08
Solyc00g023700	2.2325	Expressed	0	0.3025	0.2275	0.075	0	0.0425	0.0225	0.065	0	0.0325	0	0	0	0	0.0225	0.0225	0	0.1625	0.185	0	0	0.0925	0.0275	0.025	0.025	0.03	0.0525	0.0425	0	0.045	0	0.045	0.143333	0	0.05	0	0.095	0	0.0725	0.0325	0	0	0.0275	0.1175	0.0675	0	0.0175
Solyc00g023710	1.8025	Expressed	0	0.0925	0	0.0275	0	0	0	0.0325	0.05	0	0.03	0	0	0.0625	0.0225	0.1825	0	0.0425	0.0275	0	0.075	0.03	0	0.06	0.025	0	0.0675	0.0425	0.055	0.03	0.0525	0.1025	0.09	0	0.025	0	0.0325	0	0.1	0	0.025	0	0.1425	0.0425	0.2225	0	0.1475
Solyc00g024010	0		0	0	0	0	0	0	0	0	0	0	0	0	0	0	0	0	0	0	0	0	0	0	0	0	0	0	0	0	0	0	0	0	0	0	0	0	0	0	0	0	0	0	0	0	0	0	0
Solyc00g024020	0		0	0	0	0	0	0	0	0	0	0	0	0	0	0	0	0	0	0	0	0	0	0	0	0	0	0	0	0	0	0	0	0	0	0	0	0	0	0	0	0	0	0	0	0	0	0	0
Solyc00g024030	0		0	0	0	0	0	0	0	0	0	0	0	0	0	0	0	0	0	0	0	0	0	0	0	0	0	0	0	0	0	0	0	0	0	0	0	0	0	0	0	0	0	0	0	0	0	0	0
Solyc00g024040	0		0	0	0	0	0	0	0	0	0	0	0	0	0	0	0	0	0	0	0	0	0	0	0	0	0	0	0	0	0	0	0	0	0	0	0	0	0	0	0	0	0	0	0	0	0	0	0
Solyc00g024050	34.515	Expressed	0	20.11	24.62	13.0525	17.0925	18.2275	18.8025	13.59	21.1325	19.895	19.14	27.9725	29.025	34.515	28.2375	23.745	0	19.475	20.5225	10.63	10.0525	7.425	7.41	8.1775	12.33	9.875	12.48	14.995	15.8475	19.0075	18.6525	16.5075	0.0566667	0.0333333	15.3625	9.9325	10.8075	7.1425	5.47	7.3375	3.825	5.1925	3.54	5.7325	4.12	5.795	6.96
Solyc00g024150	170.723	Expressed	17.8367	169.405	143.44	113.48	98.475	75.325	76.58	83.415	85.2325	86.2	87.1025	112.267	107.718	124.302	109.862	83.8725	20.9433	134.99	116.713	69.07	40.0575	41.0575	29.7625	37.035	52.3825	46.8475	61.6675	67.2175	67.7525	80.705	76.7925	77.0575	20.17	58.0967	85.51	61.6775	50.07	30.88	27.745	34.195	16.5075	17.555	16.0725	22.615	18.8825	21.615	29.44
Solyc00g024160	25.9067	Expressed	1.36667	0	0	0.0275	0	0	0	0.0575	0	0	0.0825	0	0.0825	0.0675	0.125	0.06	1.09333	0	0.0475	0.0775	0	0	0	0	0.035	0	0	0	0	0	0	0	1.10333	4.18	0	0.045	0	0	0	0	0	0	0	0	0	0	0
Solyc00g024170	0.0533333		0	0	0	0	0	0	0	0	0	0	0	0	0.03	0	0	0	0	0.02	0	0	0	0	0	0	0	0	0	0	0	0	0	0	0	0	0	0	0	0	0	0	0	0	0	0	0	0	0
Solyc00g024370	0		0	0	0	0	0	0	0	0	0	0	0	0	0	0	0	0	0	0	0	0	0	0	0	0	0	0	0	0	0	0	0	0	0	0	0	0	0	0	0	0	0	0	0	0	0	0	0
Solyc00g024570	3.705	Expressed	0	0	0	0	0	0	0	0	0	0	0	0	0	0	0	0	0	0.1475	0.13	0.055	0.0225	0	0	0	0	0	0	0	0	0	0	0	0	0	0.6725	0.6475	0.0325	0	0	0	0	0	0	0	0	0	0
Solyc00g024670	0		0	0	0	0	0	0	0	0	0	0	0	0	0	0	0	0	0	0	0	0	0	0	0	0	0	0	0	0	0	0	0	0	0	0	0	0	0	0	0	0	0	0	0	0	0	0	0
Solyc00g024680	0		0	0	0	0	0	0	0	0	0	0	0	0	0	0	0	0	0	0	0	0	0	0	0	0	0	0	0	0	0	0	0	0	0	0	0	0	0	0	0	0	0	0	0	0	0	0	0
Solyc00g024690	0		0	0	0	0	0	0	0	0	0	0	0	0	0	0	0	0	0	0	0	0	0	0	0	0	0	0	0	0	0	0	0	0	0	0	0	0	0	0	0	0	0	0	0	0	0	0	0
Solyc00g025290	25.5133	Expressed	0.04	4.21	4.9425	4.615	2.2775	2.08	2.1225	2.3075	3.09	3.39	3.2325	3.375	3.965	3.4925	4.2425	3.445	0	5.73	5.16	1.5475	1.3375	1.4375	2.35	3.08	2.7725	2.88	3.57	3.465	4.2075	2.485	2.315	3.45	0.966667	4.19667	3.585	2.3	2.5	1.7425	2.0725	1.8425	1.8875	2.0025	2.2325	1.995	1.665	1.4025	1.2475
Solyc00g025300	1.0325	Expressed	0.03	0	0	0	0	0.045	0	0.0575	0	0	0	0	0.0225	0.045	0.03	0	0.03	0.02	0	0.0275	0	0	0	0	0	0	0	0	0	0	0.0275	0.025	0.03	0.286667	0	0.05	0.03	0	0.1225	0	0.03	0.0325	0.03	0.0425	0.1975	0	0.0175
Solyc00g025400	16.36	Expressed	0	0.11	0.0825	0.1	0.06	0.0625	0	0.085	0.0225	0.0325	0	0.095	0.0825	0.0225	0.125	0.21	0.03	0.155	0.15	0.0525	0.025	0	0.065	0.06	0	0.04	0.0625	0.02	0.055	0	0.1025	0.105	0.06	0.0433333	0.1225	0	0.0325	0	0.1	0.0525	0.0475	0.0625	0.3425	0.1075	0.2875	0.0425	0.04
Solyc00g025500	2.16333	Expressed	0	0.045	0.03	0	0.06	0.1275	0	0	0.05	0.0325	0	0.09	0.0225	0.0225	0.1075	0.18	0.0333333	0	0.0225	0.025	0.0275	0.03	0	0	0	0.045	0	0.0225	0.02	0.055	0.1375	0.2	0	0.0433333	0	0.08	0.0625	0.02	0.0775	0	0.075	0.0875	0.0825	0.1275	0.1675	0.1025	0.175
Solyc00g025510	0		0	0	0	0	0	0	0	0	0	0	0	0	0	0	0	0	0	0	0	0	0	0	0	0	0	0	0	0	0	0	0	0	0	0	0	0	0	0	0	0	0	0	0	0	0	0	0
Solyc00g025520	0		0	0	0	0	0	0	0	0	0	0	0	0	0	0	0	0	0	0	0	0	0	0	0	0	0	0	0	0	0	0	0	0	0	0	0	0	0	0	0	0	0	0	0	0	0	0	0
Solyc00g025530	0		0	0	0	0	0	0	0	0	0	0	0	0	0	0	0	0	0	0	0	0	0	0	0	0	0	0	0	0	0	0	0	0	0	0	0	0	0	0	0	0	0	0	0	0	0	0	0
Solyc00g025540	0		0	0	0	0	0	0	0	0	0	0	0	0	0	0	0	0	0	0	0	0	0	0	0	0	0	0	0	0	0	0	0	0	0	0	0	0	0	0	0	0	0	0	0	0	0	0	0
Solyc00g025650	0		0	0	0	0	0	0	0	0	0	0	0	0	0	0	0	0	0	0	0	0	0	0	0	0	0	0	0	0	0	0	0	0	0	0	0	0	0	0	0	0	0	0	0	0	0	0	0
Solyc00g025660	0.03		0	0	0	0	0	0	0	0	0	0	0	0	0	0	0	0	0	0	0	0	0	0	0	0	0	0	0	0	0	0	0	0	0	0	0	0	0	0	0	0	0	0	0	0	0	0	0
Solyc00g026160	11.075	Expressed	6.62	0.18	0	0.18	0.0275	0.0525	0.035	0	0.0275	0	0	0.115	0	0	0	0.03	2.50667	0.115	0.0225	0.165	0.13	0.1175	0.0625	0.025	0.035	0.015	0	0.0425	0.02	0.085	0.0275	0.07	0	0	0.0875	1.28	1.005	0.13	0.2775	0.1775	0.12	0.09	0.0825	0.095	0.0625	0.0225	0.025
Solyc00g026860	0.0333333		0	0	0	0	0	0	0	0	0	0	0	0	0	0	0	0	0	0	0	0	0	0	0	0	0	0	0	0	0	0	0	0	0	0	0	0	0	0	0	0	0	0	0	0	0	0	0
Solyc00g026870	0		0	0	0	0	0	0	0	0	0	0	0	0	0	0	0	0	0	0	0	0	0	0	0	0	0	0	0	0	0	0	0	0	0	0	0	0	0	0	0	0	0	0	0	0	0	0	0
Solyc00g026880	0		0	0	0	0	0	0	0	0	0	0	0	0	0	0	0	0	0	0	0	0	0	0	0	0	0	0	0	0	0	0	0	0	0	0	0	0	0	0	0	0	0	0	0	0	0	0	0
Solyc00g026890	0		0	0	0	0	0	0	0	0	0	0	0	0	0	0	0	0	0	0	0	0	0	0	0	0	0	0	0	0	0	0	0	0	0	0	0	0	0	0	0	0	0	0	0	0	0	0	0
Solyc00g026900	0		0	0	0	0	0	0	0	0	0	0	0	0	0	0	0	0	0	0	0	0	0	0	0	0	0	0	0	0	0	0	0	0	0	0	0	0	0	0	0	0	0	0	0	0	0	0	0
Solyc00g027120	0.07		0.04	0.045	0	0	0	0	0	0	0	0	0	0	0	0	0	0	0	0.02	0	0	0	0	0	0	0	0	0	0	0	0	0	0	0	0	0	0	0	0	0	0	0	0	0	0	0	0	0
Solyc00g027130	0.27		0	0	0.025	0.165	0.0575	0.045	0	0.0925	0	0	0.06	0.0225	0	0	0	0	0	0	0.0275	0.1025	0.065	0.03	0	0.05	0	0	0	0	0	0	0	0.025	0	0	0	0.0275	0	0	0	0	0.0275	0.0625	0	0.02	0.035	0	0.02
Solyc00g027140	0.1725		0	0	0	0.05	0.0325	0.0225	0.0225	0.115	0.0275	0.0725	0.0825	0.045	0.0225	0.0225	0	0.0575	0	0	0	0.0775	0	0.0575	0	0.075	0	0	0	0.065	0	0	0.0525	0.06	0	0	0.035	0	0.03	0.02	0	0	0.11	0.0625	0.105	0.0625	0.1025	0.04	0.1325
Solyc00g027640	0		0	0	0	0	0	0	0	0	0	0	0	0	0	0	0	0	0	0	0	0	0	0	0	0	0	0	0	0	0	0	0	0	0	0	0	0	0	0	0	0	0	0	0	0	0	0	0
Solyc00g027650	0		0	0	0	0	0	0	0	0	0	0	0	0	0	0	0	0	0	0	0	0	0	0	0	0	0	0	0	0	0	0	0	0	0	0	0	0	0	0	0	0	0	0	0	0	0	0	0
Solyc00g027660	0		0	0	0	0	0	0	0	0	0	0	0	0	0	0	0	0	0	0	0	0	0	0	0	0	0	0	0	0	0	0	0	0	0	0	0	0	0	0	0	0	0	0	0	0	0	0	0
Solyc00g027670	0.116667		0	0	0	0	0	0	0	0	0	0	0	0	0	0	0	0	0	0	0	0	0	0	0	0	0	0	0	0	0	0	0	0	0	0	0	0	0	0	0	0	0	0	0	0	0	0	0
Solyc00g027770	123.16	Expressed	33.0833	31.86	43.2275	45.5625	60.3475	59.08	60.7675	59.3175	56.025	60.6325	57.46	45.8475	48.125	44.28	45.5775	62.6425	27.7767	38.64	42.4625	51.9925	63.1225	54.7	51.32	59.52	50.7275	51.4775	57.0875	49.4725	46.4525	46.845	50.955	65.99	69.9967	26.08	40.055	55.62	56.4725	53.03	54.3425	51.25	45.76	47.7225	41.9625	47.3325	47.0075	42.8075	52.7625
Solyc00g027870	0.9625		0	0	0	0	0	0	0	0	0	0	0	0	0	0	0	0.03	0	0	0	0	0	0	0	0	0	0	0	0	0	0	0	0	0	0	0	0.05	0	0	0	0	0	0.03	0	0	0	0	0
Solyc00g027970	0		0	0	0	0	0	0	0	0	0	0	0	0	0	0	0	0	0	0	0	0	0	0	0	0	0	0	0	0	0	0	0	0	0	0	0	0	0	0	0	0	0	0	0	0	0	0	0
Solyc00g027980	0		0	0	0	0	0	0	0	0	0	0	0	0	0	0	0	0	0	0	0	0	0	0	0	0	0	0	0	0	0	0	0	0	0	0	0	0	0	0	0	0	0	0	0	0	0	0	0
Solyc00g027990	0		0	0	0	0	0	0	0	0	0	0	0	0	0	0	0	0	0	0	0	0	0	0	0	0	0	0	0	0	0	0	0	0	0	0	0	0	0	0	0	0	0	0	0	0	0	0	0
Solyc00g028090	0		0	0	0	0	0	0	0	0	0	0	0	0	0	0	0	0	0	0	0	0	0	0	0	0	0	0	0	0	0	0	0	0	0	0	0	0	0	0	0	0	0	0	0	0	0	0	0
Solyc00g028100	0		0	0	0	0	0	0	0	0	0	0	0	0	0	0	0	0	0	0	0	0	0	0	0	0	0	0	0	0	0	0	0	0	0	0	0	0	0	0	0	0	0	0	0	0	0	0	0
Solyc00g028110	0		0	0	0	0	0	0	0	0	0	0	0	0	0	0	0	0	0	0	0	0	0	0	0	0	0	0	0	0	0	0	0	0	0	0	0	0	0	0	0	0	0	0	0	0	0	0	0
Solyc00g028120	0		0	0	0	0	0	0	0	0	0	0	0	0	0	0	0	0	0	0	0	0	0	0	0	0	0	0	0	0	0	0	0	0	0	0	0	0	0	0	0	0	0	0	0	0	0	0	0
Solyc00g028420	0.13		0	0	0	0	0	0	0	0	0	0	0	0	0	0	0	0	0	0	0	0	0	0	0	0	0	0	0	0	0	0	0	0	0	0	0	0.0225	0	0	0	0	0	0	0	0	0	0	0
Solyc00g028520	0.0275		0	0	0	0	0	0	0	0	0	0	0	0	0	0	0	0	0	0	0	0	0	0	0	0	0	0	0	0	0	0	0	0	0	0	0	0	0	0	0	0	0	0	0	0	0	0	0
Solyc00g028530	0		0	0	0	0	0	0	0	0	0	0	0	0	0	0	0	0	0	0	0	0	0	0	0	0	0	0	0	0	0	0	0	0	0	0	0	0	0	0	0	0	0	0	0	0	0	0	0
Solyc00g028540	0		0	0	0	0	0	0	0	0	0	0	0	0	0	0	0	0	0	0	0	0	0	0	0	0	0	0	0	0	0	0	0	0	0	0	0	0	0	0	0	0	0	0	0	0	0	0	0
Solyc00g028550	0		0	0	0	0	0	0	0	0	0	0	0	0	0	0	0	0	0	0	0	0	0	0	0	0	0	0	0	0	0	0	0	0	0	0	0	0	0	0	0	0	0	0	0	0	0	0	0
Solyc00g028560	0		0	0	0	0	0	0	0	0	0	0	0	0	0	0	0	0	0	0	0	0	0	0	0	0	0	0	0	0	0	0	0	0	0	0	0	0	0	0	0	0	0	0	0	0	0	0	0
Solyc00g028760	2.22333	Expressed	0	0	0	0	0	0	0	0	0	0	0	0	0	0	0	0	0	0.1225	0	0	0	0	0	0	0	0	0	0	0	0	0	0.0125	0	0	0	0	0	0	0	0	0	0	0	0	0	0	0
Solyc00g028960	0.03		0	0	0	0	0	0	0	0	0	0	0	0	0	0	0	0	0	0	0	0	0	0	0	0	0	0	0.02	0	0	0	0	0	0	0	0	0	0	0	0	0	0	0	0	0	0	0	0
Solyc00g029060	0		0	0	0	0	0	0	0	0	0	0	0	0	0	0	0	0	0	0	0	0	0	0	0	0	0	0	0	0	0	0	0	0	0	0	0	0	0	0	0	0	0	0	0	0	0	0	0
Solyc00g029070	0		0	0	0	0	0	0	0	0	0	0	0	0	0	0	0	0	0	0	0	0	0	0	0	0	0	0	0	0	0	0	0	0	0	0	0	0	0	0	0	0	0	0	0	0	0	0	0
Solyc00g029080	0		0	0	0	0	0	0	0	0	0	0	0	0	0	0	0	0	0	0	0	0	0	0	0	0	0	0	0	0	0	0	0	0	0	0	0	0	0	0	0	0	0	0	0	0	0	0	0
Solyc00g029090	0		0	0	0	0	0	0	0	0	0	0	0	0	0	0	0	0	0	0	0	0	0	0	0	0	0	0	0	0	0	0	0	0	0	0	0	0	0	0	0	0	0	0	0	0	0	0	0
Solyc00g029190	0.1475		0	0	0.025	0.0275	0	0	0	0.0325	0.0275	0	0	0	0	0	0	0	0	0.1475	0	0	0.0275	0	0	0	0	0	0	0	0	0	0	0	0	0	0	0	0	0	0	0	0	0	0	0	0	0	0
Solyc00g029290	0		0	0	0	0	0	0	0	0	0	0	0	0	0	0	0	0	0	0	0	0	0	0	0	0	0	0	0	0	0	0	0	0	0	0	0	0	0	0	0	0	0	0	0	0	0	0	0
Solyc00g029300	0.03		0	0	0	0	0	0	0	0	0	0	0	0	0	0	0	0	0	0	0	0	0	0	0	0	0	0	0	0	0	0	0	0	0	0	0	0	0	0	0	0	0	0	0	0	0	0	0
Solyc00g029500	0.0775		0	0	0	0	0	0	0	0	0	0	0	0	0	0	0	0	0	0	0	0.025	0	0	0	0	0	0	0	0	0	0	0	0	0	0	0	0	0	0	0	0	0	0	0	0	0	0	0
Solyc00g029800	0.0325		0	0	0	0	0	0	0	0	0	0	0	0	0	0	0	0	0	0	0	0	0	0	0	0	0	0	0	0	0	0	0	0	0	0	0	0	0	0	0	0	0	0	0	0	0	0	0
Solyc00g030000	0.885		0	0	0	0.0225	0	0	0	0	0.0275	0	0.1	0.16	0.22	0.2425	0.27	0.13	0.03	0	0	0	0	0	0	0	0.0325	0.1325	0.0925	0.22	0.4425	0.61	0.345	0.2425	0	0	0	0	0	0	0.0275	0	0.34	0.68	0.3875	0.535	0.5475	0.885	0.64
Solyc00g030100	0.36		0	0	0	0	0	0	0	0	0	0	0	0	0	0	0.025	0	0	0	0	0	0	0	0	0	0	0	0	0	0	0	0	0	0	0	0	0	0	0	0	0	0.0225	0	0	0	0	0	0
Solyc00g030110	0		0	0	0	0	0	0	0	0	0	0	0	0	0	0	0	0	0	0	0	0	0	0	0	0	0	0	0	0	0	0	0	0	0	0	0	0	0	0	0	0	0	0	0	0	0	0	0
Solyc00g030210	0.0433333		0	0	0	0	0	0	0	0	0	0	0	0	0	0	0	0	0	0	0	0	0	0	0	0	0	0	0	0	0	0	0	0	0	0	0	0	0	0	0	0	0	0	0	0	0	0	0
Solyc00g030510	5.46667	Expressed	0	0.3525	0.115	0.0725	0.0525	0	0	0	0	0	0	0	0	0	0	0	0	0.1725	0.115	0.025	0.0225	0.03	0	0	0	0.015	0	0	0	0	0	0.0375	5.46667	0	0.1225	0	0.0325	0	0	0	0	0	0	0.0425	0	0	0.025
Solyc00g030520	21.58	Expressed	10.59	18.135	11.3875	11.905	8.0175	6.28	8.2625	8.565	5.6925	6.96	5.985	6.1275	4.8	4.9775	4.9725	5.365	8.15667	18.18	10.07	6.9925	6.1475	5.595	5.005	8.03	5.65	5.9025	5.9975	5.6075	6.84	5.5375	5.24	6.235	9.47333	9.10667	8.13	8	6.1375	5.6625	6.3125	5.59	4.97	5.9075	5.82	5.2075	5.4675	4.825	3.6225
Solyc00g030820	0.3125		0	0.045	0.025	0.0725	0.165	0.1075	0.1225	0.145	0.105	0.1525	0.135	0.0475	0.05	0.035	0.0525	0.06	0	0.0275	0.05	0.075	0.1175	0.06	0.0675	0.175	0.105	0.09	0.2125	0.09	0.035	0	0.1625	0.085	0	0	0	0.0275	0.0675	0.085	0.1475	0.06	0.06	0.0875	0.0775	0	0.035	0	0.0375
Solyc00g031020	0.1225		0	0	0	0	0	0	0	0	0.0275	0	0	0.025	0	0	0	0.03	0	0.0425	0	0.05	0	0	0	0.0325	0	0	0	0	0	0	0	0	0	0	0	0	0	0	0	0	0	0.025	0.025	0.0225	0	0	0.0175
Solyc00g031030	0		0	0	0	0	0	0	0	0	0	0	0	0	0	0	0	0	0	0	0	0	0	0	0	0	0	0	0	0	0	0	0	0	0	0	0	0	0	0	0	0	0	0	0	0	0	0	0
Solyc00g031040	0		0	0	0	0	0	0	0	0	0	0	0	0	0	0	0	0	0	0	0	0	0	0	0	0	0	0	0	0	0	0	0	0	0	0	0	0	0	0	0	0	0	0	0	0	0	0	0
Solyc00g031050	0		0	0	0	0	0	0	0	0	0	0	0	0	0	0	0	0	0	0	0	0	0	0	0	0	0	0	0	0	0	0	0	0	0	0	0	0	0	0	0	0	0	0	0	0	0	0	0
Solyc00g031060	0.07		0	0	0	0	0	0	0	0	0	0	0	0	0	0	0	0	0	0	0	0	0	0	0	0	0	0	0	0	0	0	0	0	0	0	0	0	0	0	0	0	0	0	0.03	0	0.07	0	0
Solyc00g031360	0.125		0	0	0	0	0	0.0325	0	0.06	0	0	0	0	0	0	0	0	0	0	0	0.0275	0	0.0625	0.085	0.125	0	0	0.02	0	0	0	0	0	0	0	0	0.0225	0	0	0.025	0	0	0	0	0	0	0	0
Solyc00g031370	0		0	0	0	0	0	0	0	0	0	0	0	0	0	0	0	0	0	0	0	0	0	0	0	0	0	0	0	0	0	0	0	0	0	0	0	0	0	0	0	0	0	0	0	0	0	0	0
Solyc00g031380	0		0	0	0	0	0	0	0	0	0	0	0	0	0	0	0	0	0	0	0	0	0	0	0	0	0	0	0	0	0	0	0	0	0	0	0	0	0	0	0	0	0	0	0	0	0	0	0
Solyc00g031390	0		0	0	0	0	0	0	0	0	0	0	0	0	0	0	0	0	0	0	0	0	0	0	0	0	0	0	0	0	0	0	0	0	0	0	0	0	0	0	0	0	0	0	0	0	0	0	0
Solyc00g031490	0		0	0	0	0	0	0	0	0	0	0	0	0	0	0	0	0	0	0	0	0	0	0	0	0	0	0	0	0	0	0	0	0	0	0	0	0	0	0	0	0	0	0	0	0	0	0	0
Solyc00g031500	0		0	0	0	0	0	0	0	0	0	0	0	0	0	0	0	0	0	0	0	0	0	0	0	0	0	0	0	0	0	0	0	0	0	0	0	0	0	0	0	0	0	0	0	0	0	0	0
Solyc00g031700	0		0	0	0	0	0	0	0	0	0	0	0	0	0	0	0	0	0	0	0	0	0	0	0	0	0	0	0	0	0	0	0	0	0	0	0	0	0	0	0	0	0	0	0	0	0	0	0
Solyc00g031710	0		0	0	0	0	0	0	0	0	0	0	0	0	0	0	0	0	0	0	0	0	0	0	0	0	0	0	0	0	0	0	0	0	0	0	0	0	0	0	0	0	0	0	0	0	0	0	0
Solyc00g031720	0		0	0	0	0	0	0	0	0	0	0	0	0	0	0	0	0	0	0	0	0	0	0	0	0	0	0	0	0	0	0	0	0	0	0	0	0	0	0	0	0	0	0	0	0	0	0	0
Solyc00g031730	0		0	0	0	0	0	0	0	0	0	0	0	0	0	0	0	0	0	0	0	0	0	0	0	0	0	0	0	0	0	0	0	0	0	0	0	0	0	0	0	0	0	0	0	0	0	0	0
Solyc00g032030	1.1925	Expressed	0	0	0	0.025	0.0325	0.03	0.055	0.0325	0	0.025	0.0775	0.0475	0.0575	0.115	0.055	0.085	0	0.0325	0	0.105	0.0825	0	0.095	0	0	0.04	0.025	0	0	0.0275	0	0.0225	0	0	0	0.285	0.0625	0.02	0.0525	0	0.0225	0.2125	0.025	0.0425	0	0.0425	0.02
Solyc00g032230	0.0675		0	0	0	0	0	0	0	0	0	0	0	0	0	0	0	0	0	0	0	0	0	0	0	0	0	0	0	0	0	0	0	0	0	0	0	0	0	0	0	0	0	0	0	0	0	0	0
Solyc00g032940	0.04		0	0	0	0	0	0	0	0	0	0	0	0	0	0	0	0	0.03	0	0	0	0	0	0	0	0	0	0	0	0	0	0	0	0	0	0	0	0	0	0	0	0	0	0	0	0	0	0
Solyc00g033460	8.49667	Expressed	0.723333	5.335	1.8175	0.05	0.11	0	0.0325	0	0	0.0325	0	0	0	0	0	0	0.0333333	3.6775	0.375	0.085	0	0.0625	0	0	0	0	0.025	0	0	0	0	0	0	1.11667	3.135	0.13	0	0	0	0	0	0	0	0	0	0	0
Solyc00g033860	0.0225		0	0	0	0	0	0	0	0	0	0	0	0	0	0	0	0	0	0	0	0	0	0	0	0	0	0	0	0	0	0	0	0	0	0	0	0	0	0	0	0	0	0	0	0	0	0	0
Solyc00g033870	0		0	0	0	0	0	0	0	0	0	0	0	0	0	0	0	0	0	0	0	0	0	0	0	0	0	0	0	0	0	0	0	0	0	0	0	0	0	0	0	0	0	0	0	0	0	0	0
Solyc00g033880	0.0766667		0	0	0	0	0	0	0	0	0	0	0	0	0	0	0	0	0	0	0	0	0	0	0	0	0	0	0	0	0	0	0	0	0	0	0	0	0	0	0	0	0	0	0	0	0	0	0
Solyc00g033890	0		0	0	0	0	0	0	0	0	0	0	0	0	0	0	0	0	0	0	0	0	0	0	0	0	0	0	0	0	0	0	0	0	0	0	0	0	0	0	0	0	0	0	0	0	0	0	0
Solyc00g033990	0		0	0	0	0	0	0	0	0	0	0	0	0	0	0	0	0	0	0	0	0	0	0	0	0	0	0	0	0	0	0	0	0	0	0	0	0	0	0	0	0	0	0	0	0	0	0	0
Solyc00g034000	0		0	0	0	0	0	0	0	0	0	0	0	0	0	0	0	0	0	0	0	0	0	0	0	0	0	0	0	0	0	0	0	0	0	0	0	0	0	0	0	0	0	0	0	0	0	0	0
Solyc00g034010	0.115		0	0	0	0	0	0	0	0	0	0	0	0	0	0	0	0	0	0	0	0	0.025	0	0	0	0	0	0	0	0	0	0	0	0	0	0	0	0	0	0	0	0	0	0	0	0	0	0
Solyc00g034810	0.045		0	0	0	0	0	0	0	0	0	0	0	0	0	0	0	0	0	0	0	0	0	0	0	0	0	0	0	0	0	0	0	0	0	0	0	0.0275	0	0	0	0	0	0	0	0	0	0	0
Solyc00g035010	0.0175		0	0	0	0	0	0	0	0	0	0	0	0	0	0	0	0	0	0	0	0	0	0	0	0	0	0	0	0	0	0	0	0	0	0	0	0	0	0	0	0	0	0	0	0	0	0	0
Solyc00g035020	0.2025		0	0	0	0	0	0	0	0	0	0	0	0.0225	0	0	0	0	0	0	0	0	0	0	0	0	0	0	0	0.02	0	0	0	0	0	0	0	0	0	0	0	0	0	0	0	0	0	0	0
Solyc00g036320	8.63333	Expressed	0	0.02	0.025	0.15	0.1875	0.215	0.19	0.245	0.2075	0.1525	0.1075	0.2	0.095	0.05	0	0.03	0	0.58	0.0475	0.075	0.0475	0	0	0.07	0	0	0.0775	0.04	0.055	0.07	0.03	0.0125	0	0	0.5925	0.3425	0.1	0.045	0	0	0	0	0	0	0	0	0
Solyc00g036520	1.655	Expressed	0	0.04	0.0725	0.05	0.065	0	0.0325	0.03	0.0225	0	0.0275	0	0.0225	0	0.0225	0.11	0	0.1425	0.075	0.0275	0.0525	0.03	0.035	0	0.035	0.04	0.0775	0.0225	0.0375	0.0525	0.13	0.1975	0.03	0	0.0525	0	0	0.0425	0.025	0.02	0.055	0.0275	0.1875	0.16	0.0625	0.0425	0.08
Solyc00g036530	1.115	Expressed	0	0.0325	0	0.0275	0	0.0225	0	0	0	0.0325	0	0	0	0.0225	0.0525	0.03	0	0.0525	0.025	0	0	0	0	0.0325	0	0	0	0.085	0	0.025	0.0225	0	0.0866667	0	0.035	0	0	0	0.025	0.0275	0.0275	0	0.0525	0	0.0325	0	0.06
Solyc00g036540	3.2075	Expressed	0	0.3225	0.435	0.4275	0.1725	0.0675	0.125	0.06	0.05	0	0.13	0.1975	0.205	0.1775	0.1375	0.4375	0	0.78	1.01	0.7375	0.4525	0.09	0.215	0.0325	0.06	0	0.02	0.0425	0.02	0.0425	0.0225	0.1175	0	0	0.8575	0.5675	0.3525	0	0.525	0	0.03	0.5225	0.0825	0.12	0.07	0.185	0.0375
Solyc00g036740	0.0325		0	0	0	0	0	0	0	0	0	0	0	0	0	0	0	0	0	0	0	0	0	0	0	0	0	0	0	0	0	0	0	0	0	0	0	0	0	0	0	0	0	0	0	0	0	0	0
Solyc00g036750	0		0	0	0	0	0	0	0	0	0	0	0	0	0	0	0	0	0	0	0	0	0	0	0	0	0	0	0	0	0	0	0	0	0	0	0	0	0	0	0	0	0	0	0	0	0	0	0
Solyc00g036760	0.173333		0	0	0	0	0	0	0	0	0	0	0	0	0	0	0	0	0	0	0	0	0	0	0	0	0	0	0	0	0	0	0	0	0.173333	0	0	0	0	0	0	0	0	0	0	0	0	0	0
Solyc00g036960	1.01	Expressed	0	0.0225	0	0	0	0	0	0	0	0	0	0	0	0	0	0	0	0.0275	0.0575	0.0275	0	0	0	0	0	0	0	0	0	0	0	0	0	0	0.48	0.065	0.0325	0	0	0.02	0	0	0	0	0	0	0.025
Solyc00g038390	0.035		0	0	0	0	0	0	0	0	0	0	0	0	0	0	0	0	0	0	0	0	0	0	0	0	0	0	0	0	0	0	0	0	0	0	0	0	0	0	0	0	0	0	0	0	0.0275	0	0
Solyc00g039290	1.03	Expressed	0	0	0	0	0	0	0	0	0	0	0	0	0	0	0	0	0	0.1225	0	0	0	0	0	0	0	0	0	0	0	0	0	0	0	0	0.025	0.0575	0	0	0	0	0	0	0	0	0	0	0
Solyc00g039990	11.7167	Expressed	3.17	9.2075	6.225	7.2225	4.38	4.5	4.195	5.02	4.2675	5.145	5.3825	3.6125	4.63	3.65	4.535	6.7	3.66667	9.62	5.2275	4.655	4	3.2925	2.6325	3.5375	3.8675	3.22	3.385	4.1275	3.5975	4.195	4.06	6.115	1.81667	0.91	6.0175	5.085	3.695	4.13	4.715	3.5275	3.6125	3.06	3.455	4.4575	4.6775	3.1375	4.645
Solyc00g040290	0.055		0	0	0	0	0	0	0	0	0	0	0	0	0	0	0	0	0	0	0	0	0	0	0	0	0	0	0	0	0	0	0	0	0	0	0	0	0	0	0	0	0	0	0	0	0	0	0
Solyc00g040390	0.03		0	0	0	0	0	0	0	0	0	0	0	0	0	0	0	0	0	0	0	0	0	0	0	0	0	0	0	0	0	0	0	0	0	0	0	0	0	0	0	0	0	0	0	0	0	0	0
Solyc00g040490	0.04		0	0	0	0	0	0	0	0	0	0	0	0	0	0	0	0	0	0.0275	0	0	0	0	0	0	0	0	0	0	0	0	0	0	0	0	0	0	0	0	0	0	0	0	0	0	0	0	0
Solyc00g041090	0.4225		0	0	0	0	0	0	0	0	0	0	0	0	0	0	0	0	0	0	0	0	0.0325	0.03	0	0	0	0	0	0	0	0	0	0	0	0	0	0	0.0325	0	0	0	0	0.03	0	0	0	0.025	0
Solyc00g041190	0		0	0	0	0	0	0	0	0	0	0	0	0	0	0	0	0	0	0	0	0	0	0	0	0	0	0	0	0	0	0	0	0	0	0	0	0	0	0	0	0	0	0	0	0	0	0	0
Solyc00g041200	0		0	0	0	0	0	0	0	0	0	0	0	0	0	0	0	0	0	0	0	0	0	0	0	0	0	0	0	0	0	0	0	0	0	0	0	0	0	0	0	0	0	0	0	0	0	0	0
Solyc00g041210	0		0	0	0	0	0	0	0	0	0	0	0	0	0	0	0	0	0	0	0	0	0	0	0	0	0	0	0	0	0	0	0	0	0	0	0	0	0	0	0	0	0	0	0	0	0	0	0
Solyc00g041220	0		0	0	0	0	0	0	0	0	0	0	0	0	0	0	0	0	0	0	0	0	0	0	0	0	0	0	0	0	0	0	0	0	0	0	0	0	0	0	0	0	0	0	0	0	0	0	0
Solyc00g042120	0.13		0	0	0.0475	0.0225	0.0325	0.0325	0.0825	0.0275	0.0525	0	0	0.0675	0.045	0.035	0	0.0575	0	0	0	0.025	0.025	0.03	0	0.0575	0.035	0	0	0	0	0.115	0.0225	0	0	0	0	0	0	0.02	0	0	0.0475	0.0525	0.025	0.0425	0	0.0275	0.0375
Solyc00g042130	0		0	0	0	0	0	0	0	0	0	0	0	0	0	0	0	0	0	0	0	0	0	0	0	0	0	0	0	0	0	0	0	0	0	0	0	0	0	0	0	0	0	0	0	0	0	0	0
Solyc00g042140	0		0	0	0	0	0	0	0	0	0	0	0	0	0	0	0	0	0	0	0	0	0	0	0	0	0	0	0	0	0	0	0	0	0	0	0	0	0	0	0	0	0	0	0	0	0	0	0
Solyc00g042640	0.245		0	0.175	0.0975	0.0775	0.1475	0	0.1325	0.0575	0.055	0	0.075	0	0	0.1175	0.0225	0.0225	0	0.095	0.1825	0.135	0.0325	0.245	0.0925	0.215	0.035	0.0525	0.0325	0.0425	0	0.03	0	0.0125	0	0	0.1575	0.1075	0.23	0.1175	0.0525	0.02	0	0.0525	0.025	0.0225	0	0	0
Solyc00g042840	3.09333	Expressed	2.78667	0.7025	0.29	0.98	0.565	0.4225	0.665	0.405	1.315	1.195	0.8325	0.3675	0.4375	0.1575	0.185	0.07	2.40667	0.9	1.095	1.48	0.2375	0.4175	0.5025	0.3475	0.3325	0.08	0.1675	0.15	0.1	0.075	0.0275	0.0375	0.44	0.743333	0.7325	1.12	0.9	0.3475	0.3775	0.4625	0.5925	0.13	0.4475	0.45	0.265	0.19	0.3225
Solyc00g042850	0.085		0	0.0225	0.025	0.05	0	0.0325	0	0.0575	0.0275	0.0325	0.06	0.0475	0	0.0225	0	0.065	0	0.055	0.0325	0	0	0	0.03	0.025	0	0.015	0.025	0	0.0275	0	0.055	0	0	0	0.035	0.085	0	0.0425	0	0	0.0225	0.055	0	0	0	0.0175	0.0175
Solyc00g044350	9.1775	Expressed	5.68333	9.1775	3.375	2.0775	1.4675	0.37	0.945	0.655	0.4775	0.235	0.12	0.2725	0.255	0.095	0.0775	0	1.18333	6.09	2.325	0.6925	0.5875	0.5375	0.515	0.3925	0.325	0.195	0.3675	0.0625	0	0	0	0	0.0766667	1.16333	8.0975	3.4875	1.42	0.5775	0.3525	0.7025	0	0	0.08	0.0425	0	0	0
Solyc00g044550	0.716667		0	0	0	0	0.0275	0.0325	0.0225	0	0	0.065	0	0	0.0225	0	0.03	0.0225	0	0.0425	0	0	0.0225	0.03	0	0	0.035	0	0	0.02	0	0	0	0	0	0.0666667	0.025	0	0	0	0.0525	0.065	0	0.025	0	0	0.1025	0	0.0225
Solyc00g044750	36.71	Expressed	0.123333	0.02	0.03	0.0275	0.09	0.1425	0.145	0.06	0.0275	0.0725	0.1875	0.095	0.075	0.0225	0.0225	0.1425	0	0.1575	0.465	0.425	0.0725	0.06	0	0.275	0.1275	0.04	0.11	0.1975	0.145	0.1675	0.0725	0.0875	0	0	1.8	7.645	0.94	0.105	0.045	0.0225	0.1325	0.505	0.0775	0.2675	0.2625	0.31	0.1075
Solyc00g045570	67.73	Expressed	0	0.6875	0.4825	0.1025	0.095	0.075	0.035	0.09	0.0275	0.2075	0.105	2.78	3.135	4.0025	5.085	10.465	0.0333333	0.3625	0.4125	0.11	0.1	0.0575	0.03	0.03	0.1175	0.63	0.425	6.7525	10.335	6.2075	6.675	15.3225	0	0.0366667	0.1225	0.085	0	0	0.05	0	3.8325	17.35	3.6425	24.6625	30.15	28.155	35.5725
Solyc00g046570	0.85		0.0633333	0.0325	0	0	0	0	0	0	0	0	0.0275	0	0	0	0	0.03	0	0	0.0275	0	0.0275	0	0	0	0	0	0	0.02	0	0	0	0	0	0	0.095	0.0275	0	0	0	0	0	0.0325	0	0.02	0	0	0
Solyc00g046580	1.24	Expressed	0	0	0	0	0.065	0	0	0	0	0	0	0	0	0.0225	0	0	0	0	0.0275	0.05	0.0275	0.0925	0.035	0	0.035	0	0	0.02	0	0	0	0	0	0	0.17	0.05	0	0	0	0	0	0.0275	0	0	0	0	0
Solyc00g046980	0.045		0	0	0	0	0	0	0	0	0	0	0	0	0	0	0	0	0	0	0	0	0	0	0	0	0	0	0.045	0	0	0	0	0	0	0	0	0	0	0	0	0	0	0	0	0	0	0	0
Solyc00g047180	1.2475	Expressed	0	0.055	0	0.0225	0.0325	0	0	0	0	0	0	0.045	0	0.0275	0	0.0275	0.03	0.1	0	0	0.025	0	0	0.025	0	0.015	0.035	0	0	0.025	0.0275	0.0225	0	0	0	0	0	0	0	0	0.05	0.0525	0.115	0.055	0.095	0	0.14
Solyc00g047190	1.1475	Expressed	0	0	0.025	0	0	0	0	0	0	0	0	0	0	0	0	0	0	0.0225	0.0325	0	0.0275	0	0	0	0	0	0.02	0	0	0	0	0	0.03	0	0	0	0	0.02	0.0725	0	0	0	0.115	0	0.19	0.045	0.0375
Solyc00g047200	6.54	Expressed	0.206667	0.475	0.2475	0.9775	0.2325	0.16	0.16	0.145	0.1225	0.255	0.03	0.0925	0.1175	0.17	0.3425	0.3275	0	1.18	0.4675	0.4475	0.475	0.2025	0.285	0.2075	0.1175	0.1475	0.14	0.2525	0.3275	0.0975	0.08	0.395	3.06333	0.36	0.4225	0.3325	0.33	0.1725	0.45	0.155	0.0875	0.3475	0.2325	0.4525	0.325	0.2725	0.34
Solyc00g047700	378.863	Expressed	15.7133	337.285	304.332	246.218	157.903	118.985	127.397	126.718	145.49	140.15	163.303	106.653	117.875	108.27	102.085	91.66	15.39	378.863	298.675	191.572	113.918	94.4425	112.41	120.028	120.192	110.877	121.103	90.7275	93.0375	90.98	80.5425	84.87	13.84	11.5533	210.882	121.665	84.31	68.57	65.915	68.5725	78.8275	88.555	99.47	71.015	77.6025	74.67	73.2475
Solyc00g047810	0.3275		0	0.0425	0	0.0725	0	0.0425	0.0225	0.0575	0.055	0.0975	0.155	0.0475	0.0675	0.095	0.1875	0.085	0	0.0425	0.0325	0.025	0.0275	0.06	0.2325	0.0575	0	0.04	0.035	0.0425	0.055	0.02	0.0575	0.035	0	0	0	0.0275	0.065	0.1375	0.135	0.0425	0.05	0.0475	0.195	0.0425	0.1175	0	0.145
Solyc00g048410	1.3125	Expressed	0	0	0	0	0	0	0	0	0	0	0	0	0.03	0	0	0	0	0	0	0	0	0	0	0	0	0	0	0	0	0	0	0	0	0	0	0	0	0.02	0	0	0	0	0	0.0225	0.0325	0	0
Solyc00g048510	25.3925	Expressed	0.04	1.125	1.3525	1.17	0.5025	1.0125	1.0925	1.265	1.56	2.1175	1.7375	2.4175	1.45	2.045	5.8475	1.7275	0.21	0.73	1.3	0.9525	0.74	1.2175	1.85	3.065	4.3125	3.1925	5.225	4.305	1.9575	2.185	2.3475	0.9925	0	0	0.325	0.1	0.165	0.24	0.2675	0.1325	0.44	0.7925	0.3775	0.0625	0.1025	0.235	0.245
Solyc00g049210	7.685	Expressed	0.03	0.865	0.49	1.12	0.385	0.215	0.1175	0.1825	0.33	0.2325	0.2075	0.1825	0.235	0.2275	0.3525	0.4575	0	2.025	0.3375	0.4775	0.405	0.15	0.3	0.3725	0.25	0.21	0.2075	0.2575	0.445	0.165	0.2325	0.445	0.03	0.626667	0.38	0.3275	0.195	0.0625	0.25	0.0675	0.135	0.1375	0.31	0.345	0.29	0.2175	0.25
Solyc00g049220	1.4825	Expressed	0	0	0	0.025	0.0325	0	0	0	0	0	0	0	0.0225	0	0	0	0	0.0275	0	0	0	0.03	0	0	0.0325	0.025	0.045	0.02	0	0	0	0	0	0.13	0	0	0.0625	0	0.1475	0.0275	0	0.0325	0.2	0	0	0	0
Solyc00g049520	99.295	Expressed	0.263333	4.405	11.5	81.9475	77.895	66.3225	72.2025	82.675	65.445	85.415	99.295	37.27	32.5675	41.11	33.315	26.4225	0.06	4.0775	10.5725	57.0575	59.9	63.8175	92.555	76.835	53.775	47.8525	50.265	46.68	26.83	51.7025	31.08	21.765	0	0	6	6.085	4.12	3.4875	3.7225	5.71	0.6425	0.5075	0.8225	0.8775	0.3	1.05	0.5675
Solyc00g049620	0.2025		0	0	0	0	0	0	0	0	0	0	0	0	0	0	0	0	0	0	0	0.0275	0	0	0	0	0	0	0	0	0	0	0	0	0	0	0	0.0225	0	0	0	0	0	0	0	0	0	0	0
Solyc00g049920	0		0	0	0	0	0	0	0	0	0	0	0	0	0	0	0	0	0	0	0	0	0	0	0	0	0	0	0	0	0	0	0	0	0	0	0	0	0	0	0	0	0	0	0	0	0	0	0
Solyc00g050020	0		0	0	0	0	0	0	0	0	0	0	0	0	0	0	0	0	0	0	0	0	0	0	0	0	0	0	0	0	0	0	0	0	0	0	0	0	0	0	0	0	0	0	0	0	0	0	0
Solyc00g050030	0.1		0	0	0	0.025	0	0	0	0	0	0	0	0	0	0	0	0	0	0	0	0	0	0	0	0	0	0	0	0	0	0	0	0	0	0.1	0	0	0	0	0	0	0	0	0	0	0	0	0
Solyc00g050130	34.0925	Expressed	1.38	13.2125	13.285	11.72	12.6375	9.4675	9.75	10.6475	8.38	8.55	9.0875	3.9625	3.43	2.72	4.4525	5.43	5.4	17.77	21.345	10.705	9.0625	9.055	9.3675	7.9725	9.4625	9.2625	9.89	3.715	4.42	3.7475	4.515	6.1925	2.81333	0.656667	5.5125	5.01	6.5975	11.0375	9.895	10.845	4.3825	4.7725	4.59	3.925	3.745	3.665	3.7725
Solyc00g050430	59.15	Expressed	14.55	59.15	24.0075	8.9325	1.93	0.81	0.99	0.45	1.125	0.9775	0.69	1.23	0.545	0.19	0.2175	0.14	8.56667	43.3625	15.985	6.4475	1.415	0.475	0.47	0.5075	0.1475	0.105	0.0875	0.4825	0.2975	0.08	0.2825	0.24	1.56667	1.66333	9.325	3.7975	0.6375	0.18	0.145	0.38	0.025	0.025	0.05	0.045	0.035	0.075	0.025
Solyc00g052430	8.8525	Expressed	2.75333	0.655	0.5275	0.9325	0.46	0.2575	0.235	0.115	0.3975	0.2175	0.245	0.1825	0.145	0.535	0.43	0.68	0	1.6025	0.8225	0.6	0.44	0.27	0.27	0.1625	0.1825	0.185	0.5025	0.425	0.325	0.4075	0.3725	0.62	0.74	2.20333	0.725	0.3375	0.39	0.34	0.3025	0.4	0.285	0.4825	0.7225	0.6875	0.4875	0.4	0.5925
Solyc00g052530	2.48	Expressed	0	0.085	0.025	0.0525	0.095	0.0675	0	0.085	0.0275	0.0325	0.03	0.025	0.0225	0.0275	0.13	0.42	0	0.2425	0.165	0.0825	0.0725	0.0325	0.0275	0	0.025	0.055	0.08	0.0875	0	0.05	0.08	0.175	0.113333	0.293333	0.0425	0.055	0	0.0225	0.1175	0.0275	0.1	0.0575	0.2525	0.1725	0.0925	0.115	0.175
Solyc00g052540	1.89	Expressed	0.0633333	0	0	0	0.0325	0	0	0	0.0225	0.0325	0.1	0.115	0.1275	0.085	0.2	0.13	0.0333333	0	0.0475	0.0275	0	0.03	0	0	0.035	0.03	0.0325	0.1075	0.0575	0.2275	0.1325	0.1875	0.106667	0	0	0.0275	0.0325	0.02	0.055	0	0.0225	0.025	0.1075	0.1075	0.065	0.045	0.045
Solyc00g052940	2.95	Expressed	2.95	0.22	0.0975	0	0	0.065	0.0325	0.0575	0	0.0625	0.2	0	0.0225	0	0	0.0225	1.09667	0.2475	0.0325	0.025	0	0.03	0.03	0.0575	0	0	0.085	0.0225	0	0	0	0.0125	0	0	0	0.13	0	0	0	0	0	0	0	0	0	0	0
Solyc00g053440	78.245	Expressed	0.04	6.625	10.325	7.3925	13.92	64.605	40.3	15.875	78.245	44.28	28.7575	74.8975	55.7	45.8975	36.6175	47.6775	0.07	5.9825	9.31	9.5375	10.87	32.7175	22.165	14.4225	53.115	34.78	30.2525	56.9025	42.7925	43.395	32.125	45.64	0.2	0.116667	6.4375	8.1875	11.3175	44.295	27.2375	20.5275	48.45	27.16	25.865	36.235	32.87	20.155	25.325
Solyc00g053740	0.0333333		0	0	0	0	0	0	0	0	0	0	0	0	0	0	0	0	0	0	0	0	0	0	0	0	0	0	0	0	0	0	0	0	0	0	0	0	0	0	0	0.0275	0.025	0	0	0	0	0	0
Solyc00g055940	0.105		0	0	0	0	0.025	0.03	0	0	0.0275	0	0.0225	0	0.03	0	0.055	0	0	0	0	0.0275	0	0	0.06	0	0	0	0	0.02	0	0.02	0.05	0.0125	0	0	0	0	0.0325	0.065	0.1	0.0325	0.0275	0.0325	0.055	0	0.0275	0.0225	0
Solyc00g055950	0		0	0	0	0	0	0	0	0	0	0	0	0	0	0	0	0	0	0	0	0	0	0	0	0	0	0	0	0	0	0	0	0	0	0	0	0	0	0	0	0	0	0	0	0	0	0	0
Solyc00g055960	0		0	0	0	0	0	0	0	0	0	0	0	0	0	0	0	0	0	0	0	0	0	0	0	0	0	0	0	0	0	0	0	0	0	0	0	0	0	0	0	0	0	0	0	0	0	0	0
Solyc00g055970	0		0	0	0	0	0	0	0	0	0	0	0	0	0	0	0	0	0	0	0	0	0	0	0	0	0	0	0	0	0	0	0	0	0	0	0	0	0	0	0	0	0	0	0	0	0	0	0
Solyc00g055980	0		0	0	0	0	0	0	0	0	0	0	0	0	0	0	0	0	0	0	0	0	0	0	0	0	0	0	0	0	0	0	0	0	0	0	0	0	0	0	0	0	0	0	0	0	0	0	0
Solyc00g056180	0		0	0	0	0	0	0	0	0	0	0	0	0	0	0	0	0	0	0	0	0	0	0	0	0	0	0	0	0	0	0	0	0	0	0	0	0	0	0	0	0	0	0	0	0	0	0	0
Solyc00g056680	14.15	Expressed	1.32667	1.055	1.88	1.99	3.3925	1.24	2.25	2.26	1.425	1.9475	2.2875	1.7275	2.1725	3.02	2.2825	4.305	2.85333	1.1425	1.9775	3.7225	1.8925	1.505	1.8525	2.0725	1.5875	2.545	1.9725	2.49	3.565	2.8975	4.4825	5.62	0.703333	0.753333	1.8025	2.205	2.08	1.56	1.58	1.3	2.3075	2.52	2.2575	2.715	2.755	2.9575	3.1525
Solyc00g057280	0.493333		0	0	0	0	0	0	0	0	0	0	0	0	0	0	0	0	0	0	0	0	0	0	0	0	0	0	0	0	0	0	0	0	0	0	0.025	0	0	0	0	0	0	0	0	0	0	0	0
Solyc00g057880	7.3	Expressed	0.913333	1.085	1.1925	1.9475	1.9775	1.02	1.4125	1.725	1.695	1.455	2.1275	1.2675	0.96	1	1.0475	0.8575	0.74	1.3125	1.36	1.5775	1.485	1.3875	1.4575	1.36	0.865	0.7275	1.105	0.6975	0.54	0.6375	0.7225	0.5825	0.346667	1.05667	0.895	0.99	0.4775	0.39	0.4725	0.3875	0.03	0.675	0.0775	0.1925	0.2925	0.1675	0.2125
Solyc00g058280	0.673333		0	0	0	0.095	0.075	0.0875	0.19	0.0525	0.0775	0.0575	0.0575	0.0225	0.045	0.05	0	0.03	0	0	0	0.0775	0.1075	0.0925	0.1225	0.075	0.025	0.025	0.02	0.02	0.0325	0.025	0	0.025	0	0	0.025	0.0275	0	0.02	0	0	0.0225	0.15	0.0275	0.02	0	0.0425	0.025
Solyc00g058480	0.3		0	0	0	0	0.0325	0.0225	0.055	0.14	0.0775	0.065	0.15	0	0.0225	0.0975	0	0.0825	0	0	0	0	0.0225	0.0925	0.0325	0.0975	0.025	0.025	0.045	0.04	0.035	0.02	0.0275	0.0375	0	0	0.0175	0	0	0.02	0.0225	0	0.025	0.0625	0	0	0.035	0.0175	0
Solyc00g058490	0.29		0.123333	0.0225	0.055	0.1	0.09	0	0	0.0325	0.0275	0.065	0	0.0225	0	0	0	0.03	0.1	0.0225	0.14	0.13	0	0	0.0325	0	0.025	0	0.055	0.04	0.035	0	0.0225	0.0125	0	0	0.1825	0.0275	0.0325	0	0	0.045	0.0525	0.12	0.0525	0.0425	0.0275	0.0625	0
Solyc00g058890	10.18	Expressed	0.0833333	0	0.05	0	0	0	0	0.03	0	0	0	0	0	0	0	0	0	0.0325	0	0.025	0.0325	0	0	0	0	0.025	0.0675	0	0	0	0	0	0	0	0.035	0.0225	0.0325	0.02	0	0	0	0.0575	0.0275	0	0.0325	0	0.0175
Solyc00g058900	1.3125	Expressed	0	0	0	0	0	0	0	0	0	0	0	0	0	0	0	0	0	0	0	0	0	0.03	0	0	0	0	0	0	0	0	0	0	0	0	0	0	0	0	0	0.0275	0.0275	0	0	0.0425	0	0.0175	0.0425
Solyc00g059100	39.4367	Expressed	15.25	4.3125	5.1	7.11	4.2825	3.5	4.105	4.0125	4.42	4.655	4.725	4.0375	4.475	4.6	3.765	5.32	30.01	5.63	6.2825	5.625	4.9375	4.0675	4.38	4.4575	4.9975	3.84	4.55	3.875	3.285	4.055	3.2425	3.8575	39.4367	17.1167	6.77	9.4675	5.1475	3.615	4.3875	3.7975	3.1175	3.1575	3.4	3.39	3.4875	3.27	3.0225
Solyc00g059500	12.88	Expressed	0	3.4925	4.2825	2.545	6.7825	7.8825	8.2675	9.235	9.6625	11.4875	10.845	7.24	8.5075	8.4975	8.9	8.955	0.07	2.7775	3.5825	8.725	6.9125	7.9525	7.4875	8.74	7.455	7.975	7.0225	7.72	6.795	7.665	6.505	7.7125	0	0	4.2075	7.1575	5.545	7.3825	7.2275	6.9875	6.6275	5.005	6.7575	7.445	7.71	6.845	7.3825
Solyc00g060700	0		0	0	0	0	0	0	0	0	0	0	0	0	0	0	0	0	0	0	0	0	0	0	0	0	0	0	0	0	0	0	0	0	0	0	0	0	0	0	0	0	0	0	0	0	0	0	0
Solyc00g060710	0		0	0	0	0	0	0	0	0	0	0	0	0	0	0	0	0	0	0	0	0	0	0	0	0	0	0	0	0	0	0	0	0	0	0	0	0	0	0	0	0	0	0	0	0	0	0	0
Solyc00g060810	5098.67	Expressed	0	0.0925	0	0.12	0.085	0.2075	0.1675	0	18.955	25.975	3.305	31.58	34.0575	19.5825	93.305	290.738	0	0	0	1.5975	0.8775	5.3975	3.0175	3.2575	80.05	185.865	49.4075	142.107	238.458	160.275	335.233	520.062	0	0	0	0.1875	0.2275	14.1975	18.9625	12.0225	5098.67	4792.21	3320.83	2649.11	2755.82	3200.46	4227.89
Solyc00g062710	0		0	0	0	0	0	0	0	0	0	0	0	0	0	0	0	0	0	0	0	0	0	0	0	0	0	0	0	0	0	0	0	0	0	0	0	0	0	0	0	0	0	0	0	0	0	0	0
Solyc00g063110	0.025		0	0	0	0	0	0	0	0	0	0	0	0	0	0	0.0225	0	0	0	0	0	0	0	0	0	0	0	0	0	0	0	0	0	0	0	0	0	0	0	0	0	0	0	0	0	0	0	0
Solyc00g063510	0.105		0	0	0	0	0	0	0	0	0	0	0	0	0	0	0	0	0	0	0	0.055	0	0	0	0	0	0	0	0	0	0	0	0	0	0	0	0	0	0	0	0	0	0	0	0.0225	0	0	0
Solyc00g065510	0.4375		0	0.0225	0.025	0.045	0.08	0.1	0.1475	0	0.165	0.065	0.1025	0.095	0	0.0575	0.0225	0.0725	0	0.0225	0.075	0.16	0.0325	0.2075	0.0275	0.0825	0.085	0.025	0.0575	0.04	0.1425	0.1875	0.1525	0.165	0.0233333	0	0.0425	0.105	0.0975	0.1175	0.155	0.0475	0.0525	0	0.0775	0.0425	0.1325	0.0375	0.1125
Solyc00g065610	0.0425		0	0	0	0	0	0	0	0	0	0	0	0	0	0	0	0	0	0	0	0	0	0	0	0	0	0	0	0	0	0	0	0	0	0	0	0	0	0	0	0	0	0	0	0	0	0	0
Solyc00g065620	0		0	0	0	0	0	0	0	0	0	0	0	0	0	0	0	0	0	0	0	0	0	0	0	0	0	0	0	0	0	0	0	0	0	0	0	0	0	0	0	0	0	0	0	0	0	0	0
Solyc00g065630	0		0	0	0	0	0	0	0	0	0	0	0	0	0	0	0	0	0	0	0	0	0	0	0	0	0	0	0	0	0	0	0	0	0	0	0	0	0	0	0	0	0	0	0	0	0	0	0
Solyc00g065930	0.03		0	0	0.0225	0	0	0	0	0.03	0	0	0	0	0	0	0	0	0	0	0	0	0	0	0	0	0	0	0	0	0	0	0	0	0	0	0	0	0	0	0	0	0	0	0	0	0	0	0
Solyc00g065940	0		0	0	0	0	0	0	0	0	0	0	0	0	0	0	0	0	0	0	0	0	0	0	0	0	0	0	0	0	0	0	0	0	0	0	0	0	0	0	0	0	0	0	0	0	0	0	0
Solyc00g066140	0		0	0	0	0	0	0	0	0	0	0	0	0	0	0	0	0	0	0	0	0	0	0	0	0	0	0	0	0	0	0	0	0	0	0	0	0	0	0	0	0	0	0	0	0	0	0	0
Solyc00g066150	0		0	0	0	0	0	0	0	0	0	0	0	0	0	0	0	0	0	0	0	0	0	0	0	0	0	0	0	0	0	0	0	0	0	0	0	0	0	0	0	0	0	0	0	0	0	0	0
Solyc00g066350	0.45		0	0	0	0	0	0	0	0	0	0	0	0	0	0	0	0	0	0.0325	0	0	0	0	0	0	0.0325	0	0	0.02	0.065	0	0	0	0.03	0	0.0875	0.0225	0.03	0	0.025	0	0	0.0625	0	0	0.0625	0.0175	0
Solyc00g066360	0.4825		0	0	0	0	0	0	0	0	0	0	0	0	0	0	0	0	0	0.0325	0	0	0	0	0.0325	0	0.0325	0	0	0	0.065	0	0	0	0.03	0	0.1225	0.0225	0.03	0	0.025	0	0	0	0	0	0.0625	0	0
Solyc00g066370	0		0	0	0	0	0	0	0	0	0	0	0	0	0	0	0	0	0	0	0	0	0	0	0	0	0	0	0	0	0	0	0	0	0	0	0	0	0	0	0	0	0	0	0	0	0	0	0
Solyc00g067470	2.45333	Expressed	2.45333	0.9225	0.79	0.58	0.235	0.155	0.3175	0.2625	0.095	0.09	0.0925	0.0225	0.075	0.0275	0.0525	0	0.663333	0.8475	0.87	0.34	0.6975	0.2125	0.18	0.185	0.035	0.0525	0.3	0.0425	0.02	0.1075	0.08	0.025	0.1	0.143333	0.7375	0.4175	0.095	0.12	0	0.0425	0.0225	0.0525	0.08	0.0425	0	0.0175	0
Solyc00g068970	2.12667	Expressed	0.07	0	0	0	0	0	0	0	0	0	0	0	0	0	0	0	0	0	0	0	0	0	0	0	0	0	0	0	0	0	0	0	0.0566667	0	0	0	0	0	0	0	0	0	0	0	0.035	0	0
Solyc00g068980	3.4675	Expressed	0	0.055	0.0425	0.0275	0	0	0	0	0	0	0.045	0	0	0	0	0	0	0.0925	0	0	0	0	0.035	0	0	0	0	0	0	0	0	0	0	0.0766667	0.3325	0.0775	0	0	0	0	0	0.025	0	0	0.0325	0	0.02
Solyc00g069680	0.025		0	0	0	0	0	0	0	0	0	0	0	0	0	0	0	0	0	0	0	0	0	0	0	0	0	0	0	0	0	0	0	0	0	0	0	0	0	0	0	0	0	0	0	0	0	0	0
Solyc00g069880	4.7725	Expressed	0	0.3275	0	0.1975	0.14	0.1075	0.185	0.085	0.15	0.16	0.0925	0.1175	0.15	0.18	0.045	0.285	0.03	0.185	0.085	0.0525	0.0825	0.06	0.055	0.0825	0.0325	0.085	0.2475	0.15	0.1975	0.13	0.0925	0.2125	0	0	0.135	0.0575	0.065	0.045	0.2275	0.0325	0.0975	0.3275	0.3925	0.0425	0.4475	0.1625	0.2975
Solyc00g070680	0.4675		0	0	0	0.025	0	0	0	0	0	0	0	0	0	0	0	0	0	0	0	0	0	0	0	0	0	0	0	0	0	0	0	0	0	0	0.225	0	0	0	0	0	0	0	0	0	0	0	0
Solyc00g071180	64.5967	Expressed	0.193333	2.855	0.025	0.05	0.1175	0	0	0	0.0575	0	0.0525	0.4925	0	0	0	0	0.98	2.295	0.735	0	0.3675	0	0	0.055	0.035	0	0	0	0	0.0275	0	0	0.926667	0	4.575	0.4925	0.065	0	0.0825	0.0725	0	0.0275	0.055	0	0	0	0
Solyc00g071580	0.0325		0	0	0.025	0	0	0	0	0	0	0	0	0	0	0	0	0	0	0	0	0	0	0	0	0	0	0	0	0	0	0	0	0	0	0	0	0	0	0	0	0	0	0	0	0	0	0	0
Solyc00g071590	0		0	0	0	0	0	0	0	0	0	0	0	0	0	0	0	0	0	0	0	0	0	0	0	0	0	0	0	0	0	0	0	0	0	0	0	0	0	0	0	0	0	0	0	0	0	0	0
Solyc00g071600	0		0	0	0	0	0	0	0	0	0	0	0	0	0	0	0	0	0	0	0	0	0	0	0	0	0	0	0	0	0	0	0	0	0	0	0	0	0	0	0	0	0	0	0	0	0	0	0
Solyc00g072100	889.327	Expressed	86.1333	36.225	33.035	38.39	34.4975	31.695	34.0425	38.2	30.115	33.385	34.63	17.255	14.63	14.9475	11.6975	12.925	80.2233	31.635	32.9725	39.56	29.8225	30.345	35.12	30.83	17.6	19.525	19.63	11.6225	7.6625	12.7025	7.145	8.1325	55.5233	88.2167	24.1175	22.8075	19.9925	17.0725	18.2625	17.9625	4.99	4.4575	4.9425	3.0675	2.8325	2.305	2.76
Solyc00g072400	0.0633333		0	0	0	0	0	0	0	0	0	0	0	0.0225	0	0	0	0	0	0	0.0275	0	0	0	0	0	0	0.025	0	0	0	0	0	0	0	0	0	0	0.03	0	0.05	0	0	0	0	0	0	0	0
Solyc00g072800	8.175	Expressed	0.443333	0.09	0.1675	0.17	0.0625	0	0.0325	0.0325	0.0275	0.0575	0.0825	0.0925	0.205	0.08	0	0.17	0.286667	0.29	0.1425	0.1025	0.065	0.03	0	0.03	0.035	0.015	0	0.04	0.105	0.05	0.0775	0.085	0.686667	0.153333	0.08	0.0725	0	0.0425	0.1225	0.085	0.0275	0.115	0.3425	0.075	0.1975	0	0.235
Solyc00g073200	0.0275		0	0	0	0	0	0	0	0	0	0	0	0	0	0	0	0	0	0	0	0	0	0	0	0	0	0	0	0	0	0	0	0	0	0	0	0	0	0	0	0	0	0	0	0	0	0	0
Solyc00g073900	0		0	0	0	0	0	0	0	0	0	0	0	0	0	0	0	0	0	0	0	0	0	0	0	0	0	0	0	0	0	0	0	0	0	0	0	0	0	0	0	0	0	0	0	0	0	0	0
Solyc00g073910	0		0	0	0	0	0	0	0	0	0	0	0	0	0	0	0	0	0	0	0	0	0	0	0	0	0	0	0	0	0	0	0	0	0	0	0	0	0	0	0	0	0	0	0	0	0	0	0
Solyc00g074210	0.4725		0	0	0	0.025	0	0.03	0	0	0	0.025	0.0575	0.0475	0.0775	0.0275	0.025	0.12	0	0	0	0	0	0	0	0	0.035	0	0	0	0	0	0	0.065	0	0	0	0.0225	0	0.0225	0.025	0	0	0.1425	0	0	0	0	0
Solyc00g074810	0.025		0	0	0	0	0	0	0	0	0	0	0	0	0	0	0	0	0	0	0	0	0	0	0	0	0	0	0	0	0	0	0	0	0	0	0	0	0	0	0	0	0	0	0	0	0	0	0
Solyc00g074820	0		0	0	0	0	0	0	0	0	0	0	0	0	0	0	0	0	0	0	0	0	0	0	0	0	0	0	0	0	0	0	0	0	0	0	0	0	0	0	0	0	0	0	0	0	0	0	0
Solyc00g074830	0		0	0	0	0	0	0	0	0	0	0	0	0	0	0	0	0	0	0	0	0	0	0	0	0	0	0	0	0	0	0	0	0	0	0	0	0	0	0	0	0	0	0	0	0	0	0	0
Solyc00g075030	0.59		0	0	0	0	0	0	0	0	0	0	0	0	0	0	0	0	0	0	0	0	0	0	0	0	0	0	0	0	0	0	0	0	0.03	0	0	0	0	0	0	0.0275	0	0	0	0	0	0.025	0
Solyc00g075040	0.335		0	0	0	0	0.0325	0	0	0	0	0	0	0	0	0	0	0	0	0	0	0	0	0	0	0	0	0	0	0	0	0	0	0	0	0	0	0	0	0	0	0.0275	0	0	0	0	0.0325	0	0
Solyc00g075440	2.94	Expressed	0	0.275	0.4175	0.0225	0	0	0	0	0	0	0	0	0	0	0	0	0	0.3275	1.05	0.025	0.0275	0.03	0	0	0	0	0	0	0	0	0	0	0	0	0.1125	0.055	0.0325	0.045	0.0225	0	0	0	0	0	0	0	0
Solyc00g075450	4.2625	Expressed	0	0.085	0.12	0.0475	0.115	0.045	0.1775	0.09	0.1125	0.0625	0.075	0.0225	0	0	0.0475	0.0225	0	0.185	0.81	0.19	0.095	0.18	0.1	0.025	0.0325	0.085	0.0975	0	0.065	0	0	0.0125	0	0.0433333	1.87	0.5975	0.4225	0	0.21	0.09	0.025	0.0875	0.03	0.02	0.0275	0.0225	0
Solyc00g076250	0.1325		0	0	0.0225	0	0	0	0	0	0	0	0	0	0	0	0	0	0	0	0	0.0275	0	0	0	0	0	0	0	0	0	0	0	0	0	0.0666667	0	0	0	0	0	0	0	0	0.0275	0	0	0	0
Solyc00g079050	0.025		0	0	0	0	0	0	0	0	0	0	0	0	0	0	0	0	0	0	0	0	0	0	0	0	0	0	0	0	0	0	0	0	0	0	0	0	0	0	0	0	0	0	0	0	0	0	0
Solyc00g080550	0.045		0	0	0	0	0	0	0	0	0	0	0	0	0	0	0	0	0	0	0	0	0	0	0	0	0	0	0	0	0	0	0	0	0	0	0	0	0	0	0	0	0	0	0	0	0	0	0
Solyc00g080750	12.06	Expressed	12.06	2.3875	1.2375	0.215	0	0.085	0.055	0.055	0.055	0.025	0.23	0.045	0	0	0	0	0.263333	1.2675	0.19	0.0275	0.025	0.03	0	0.03	0	0	0	0	0	0	0	0.035	0.0566667	0	0.05	0.11	0.0325	0.0875	0.1025	0.0275	0	0.0625	0.0275	0.02	0.06	0	0
Solyc00g082150	116.192	Expressed	21.0367	110.983	116.192	114.547	112.343	91.7525	100.308	97.6925	69.7125	76.3025	73.485	61.2575	53.56	50.77	43.8575	47.2925	22.65	113.83	104.425	95.2925	95.4225	99.8175	91.555	110.125	88.87	83.055	83.7425	56.4725	56.575	52.94	47.845	57.9725	8.7	8.49667	89.555	93.715	93.3275	80.675	95.92	93.74	46.0575	46.8125	45.165	41.12	39.1675	32.7625	40
Solyc00g082550	0.2		0.03	0	0.0225	0	0	0	0	0	0	0	0	0	0	0	0	0	0	0	0	0	0	0	0	0	0	0	0	0	0	0	0	0	0.2	0	0	0	0	0	0	0	0	0	0	0	0	0	0
Solyc00g084650	0.06		0	0	0	0	0	0	0	0	0	0	0	0	0	0	0	0	0	0	0	0	0	0	0	0	0	0	0	0	0	0	0	0	0	0	0	0	0	0	0	0	0	0	0	0	0	0	0
Solyc00g084750	1.1675	Expressed	0.04	0.1475	0.195	0.35	0.835	0.2525	0.1275	0.205	0.42	0.335	0.5	0.7025	0.4575	0.3375	0.445	0.45	0	0.34	0.17	0.3425	0.4	0.235	0.3775	0.3175	0.345	0.5275	0.4875	0.305	0.475	0.1175	0.35	0.3875	0	0	0.3275	0.5075	0.3175	0.4725	0.6825	0.28	0.355	0.82	0.2375	0.2575	0.2475	0.145	0.425
Solyc00g084760	2.99333	Expressed	2.99333	0.4825	0.32	0.4975	0.7725	0.4125	0.6975	0.69	0.6775	0.71	0.83	0.7125	0.675	0.7675	0.3225	0.2775	0.813333	0.735	0.2725	0.595	0.4275	0.625	0.41	0.5825	0.4375	0.61	0.405	0.475	0.4425	0.4075	0.4425	0.3225	2.98667	0	0.32	0.2925	0.2575	0.26	0.12	0.22	0.255	0.19	0.2475	0.225	0.035	0.12	0.135
Solyc00g084770	3.14333	Expressed	1.74333	0.4625	0.3925	0.545	0.5675	0.54	0.6925	1.02	1.1675	0.73	1.075	1.3025	0.9	1.36	0.9775	0.525	3.14333	0.43	0.275	0.4225	0.625	0.5925	0.4825	0.7025	0.9775	0.6425	0.7275	0.84	0.975	0.7975	0.7	0.4825	0.0533333	0.0366667	0.295	0.315	0.3525	0.3025	0.265	0.365	0.2	0.3375	0.285	0.405	0.415	0.2475	0.28
Solyc00g084870	4	Expressed	0.38	0.795	0.21	0.22	0.065	0.0675	0.1025	0.08	0.0725	0.1925	0.1575	0.045	0.0525	0.05	0.075	0.1175	0.36	0.82	0.3025	0.1025	0.105	0.09	0.095	0	0.0975	0	0	0	0	0	0.0275	0	0.463333	0.976667	0.3275	0.47	0.23	0.1825	0.2475	0.0725	0.03	0.025	0	0.0225	0.035	0	0.02
Solyc00g085070	162.587	Expressed	22.27	120.963	102.612	59.3275	56.54	67.905	58.39	50.69	58.8375	53.005	51.61	65.605	63.1975	61.3025	69.5525	86.19	97.97	118.685	113.858	74.2375	54.995	68.7775	49.9225	60.2025	66.4275	63.8925	66.3725	75.0575	96.3675	73.2225	92.115	115.438	121.047	160.557	109.328	76.475	59.795	57.5475	57.5325	51.2075	64.5425	62.7675	64.1625	75.41	81.68	75.795	78.0375
Solyc00g085370	0.11		0	0	0	0	0	0	0	0	0	0	0	0	0	0	0	0	0	0	0	0	0	0	0	0	0	0	0	0.0225	0	0	0	0	0	0	0	0	0	0	0	0	0	0	0	0	0	0	0
Solyc00g085770	0		0	0	0	0	0	0	0	0	0	0	0	0	0	0	0	0	0	0	0	0	0	0	0	0	0	0	0	0	0	0	0	0	0	0	0	0	0	0	0	0	0	0	0	0	0	0	0
Solyc00g085780	0		0	0	0	0	0	0	0	0	0	0	0	0	0	0	0	0	0	0	0	0	0	0	0	0	0	0	0	0	0	0	0	0	0	0	0	0	0	0	0	0	0	0	0	0	0	0	0
Solyc00g088080	0.02		0	0	0	0	0	0	0	0	0	0	0	0	0	0	0	0	0	0	0	0	0	0	0	0	0	0	0	0	0	0	0	0	0	0	0	0	0	0	0	0	0	0	0	0	0	0	0
Solyc00g088090	0		0	0	0	0	0	0	0	0	0	0	0	0	0	0	0	0	0	0	0	0	0	0	0	0	0	0	0	0	0	0	0	0	0	0	0	0	0	0	0	0	0	0	0	0	0	0	0
Solyc00g088190	0		0	0	0	0	0	0	0	0	0	0	0	0	0	0	0	0	0	0	0	0	0	0	0	0	0	0	0	0	0	0	0	0	0	0	0	0	0	0	0	0	0	0	0	0	0	0	0
Solyc00g088200	0		0	0	0	0	0	0	0	0	0	0	0	0	0	0	0	0	0	0	0	0	0	0	0	0	0	0	0	0	0	0	0	0	0	0	0	0	0	0	0	0	0	0	0	0	0	0	0
Solyc00g088210	0		0	0	0	0	0	0	0	0	0	0	0	0	0	0	0	0	0	0	0	0	0	0	0	0	0	0	0	0	0	0	0	0	0	0	0	0	0	0	0	0	0	0	0	0	0	0	0
Solyc00g090110	0		0	0	0	0	0	0	0	0	0	0	0	0	0	0	0	0	0	0	0	0	0	0	0	0	0	0	0	0	0	0	0	0	0	0	0	0	0	0	0	0	0	0	0	0	0	0	0
Solyc00g090120	0		0	0	0	0	0	0	0	0	0	0	0	0	0	0	0	0	0	0	0	0	0	0	0	0	0	0	0	0	0	0	0	0	0	0	0	0	0	0	0	0	0	0	0	0	0	0	0
Solyc00g090130	0.02		0	0	0	0	0	0	0	0	0	0	0	0	0	0	0	0	0	0	0	0	0	0	0	0	0	0	0	0	0	0	0	0	0	0	0	0	0	0	0	0	0	0	0	0	0	0	0
Solyc00g090430	0.0966667		0	0	0	0	0	0	0	0	0	0	0	0	0	0	0	0	0	0	0	0	0	0	0	0	0	0	0	0.0225	0	0	0	0	0	0	0	0.0225	0	0	0	0	0	0	0	0	0	0	0
Solyc00g090630	0.2175		0	0	0	0	0	0	0	0	0	0	0	0	0	0	0	0	0	0	0	0	0	0	0	0	0	0	0	0	0	0	0	0	0	0	0	0.055	0	0	0	0	0.03	0	0	0	0	0	0.025
Solyc00g090640	0		0	0	0	0	0	0	0	0	0	0	0	0	0	0	0	0	0	0	0	0	0	0	0	0	0	0	0	0	0	0	0	0	0	0	0	0	0	0	0	0	0	0	0	0	0	0	0
Solyc00g090650	0		0	0	0	0	0	0	0	0	0	0	0	0	0	0	0	0	0	0	0	0	0	0	0	0	0	0	0	0	0	0	0	0	0	0	0	0	0	0	0	0	0	0	0	0	0	0	0
Solyc00g090660	0		0	0	0	0	0	0	0	0	0	0	0	0	0	0	0	0	0	0	0	0	0	0	0	0	0	0	0	0	0	0	0	0	0	0	0	0	0	0	0	0	0	0	0	0	0	0	0
Solyc00g090860	0.11		0	0	0.025	0	0	0.0225	0.035	0	0.0275	0	0.0575	0.0475	0	0	0	0.0225	0	0.02	0.0325	0.0275	0	0	0.035	0.03	0	0	0	0	0	0	0	0	0	0	0	0	0	0	0	0.0225	0	0	0.025	0.0225	0	0	0.0375
Solyc00g090870	32.325	Expressed	7.28667	9.575	9.065	3.6675	3.2	3.1475	4.07	3.935	4.1225	3.635	3.735	3.075	3.0425	3.275	3.085	2.6175	7.63	11.655	6.965	4.1875	4.2325	3.845	3.605	4.52	4.3425	3.67	5.875	2.54	2.96	2.7475	1.8925	2.335	13.1633	3.53	14.36	12.165	11.08	8.325	8.4525	8.445	3.7175	4.71	3.8525	3.4425	2.5325	2.51	2.1875
Solyc00g091170	34.9533	Expressed	12.1867	34.8775	22.535	13.2925	11.43	8.4875	8.705	8.2	5.305	5.5875	5.5525	3.69	2.4975	1.435	1.4225	2.09	5.99667	29.0875	14.9	10.0325	6.2575	5.755	3.74	5.6675	2.8025	2.6425	2.0925	1.2225	1.225	0.9625	0.975	1.895	1.70333	11.06	13.6025	6.02	4.94	3.465	4.5575	4.6525	1.49	1.3275	1.4025	0.685	0.7175	0.345	1.0675
Solyc00g092870	0		0	0	0	0	0	0	0	0	0	0	0	0	0	0	0	0	0	0	0	0	0	0	0	0	0	0	0	0	0	0	0	0	0	0	0	0	0	0	0	0	0	0	0	0	0	0	0
Solyc00g092880	0.055		0	0	0	0	0	0	0	0	0	0	0	0	0	0	0	0	0	0	0	0	0	0	0	0	0	0	0	0	0	0	0	0	0	0	0	0	0	0	0	0	0	0	0	0	0	0	0
Solyc00g092890	0.025		0	0	0	0	0	0	0	0	0	0	0	0	0	0	0	0	0	0	0	0	0	0	0	0	0	0	0	0	0	0	0	0	0	0	0	0	0	0	0	0	0	0	0	0	0	0	0
Solyc00g092900	0.1775		0	0	0	0.025	0.0275	0.11	0.0825	0.06	0.14	0.08	0.145	0	0.05	0.14	0.0625	0.1575	0	0	0	0.0275	0.055	0.1225	0.03	0.055	0.035	0.1025	0.075	0.0825	0.0375	0.0275	0.0775	0.06	0	0	0.025	0.045	0.0325	0.02	0.1275	0.0525	0	0	0.03	0	0.125	0.0675	0.065
Solyc00g093000	1.59	Expressed	0	0.49	0.425	0.735	0.7275	0.605	0.935	0.8725	0.6075	0.5275	0.87	0.7375	0.585	0.7275	0.5875	0.91	0.263333	0.3225	0.4075	0.64	0.7625	0.42	0.595	0.54	0.66	0.7075	0.5175	0.425	0.635	0.7275	0.4075	0.7975	0.193333	0	0.5	0.6475	0.485	0.4525	0.6275	0.7925	0.2825	0.465	0.5475	0.3725	1	0.8025	0.7475
Solyc00g093100	0		0	0	0	0	0	0	0	0	0	0	0	0	0	0	0	0	0	0	0	0	0	0	0	0	0	0	0	0	0	0	0	0	0	0	0	0	0	0	0	0	0	0	0	0	0	0	0
Solyc00g093300	0.0775		0	0	0	0.025	0	0	0	0	0	0	0	0	0	0	0	0	0.0333333	0.02	0	0	0	0	0	0	0	0	0	0	0	0	0	0	0	0	0.035	0.0225	0.0325	0	0	0.02	0	0.0275	0	0	0	0	0
Solyc00g093310	4.8525	Expressed	0	0	0	0	0.0325	0	0	0	0	0	0	0	0	0	0	0	0.0333333	0.0275	0.025	0.0275	0	0	0.0325	0	0.035	0	0	0	0	0	0	0	0	0	0.1325	0.6675	0.065	0	0	0	0.1	0.025	0.0575	0	0.035	0.0225	0
Solyc00g094010	0		0	0	0	0	0	0	0	0	0	0	0	0	0	0	0	0	0	0	0	0	0	0	0	0	0	0	0	0	0	0	0	0	0	0	0	0	0	0	0	0	0	0	0	0	0	0	0
Solyc00g094020	0.5125		0	0	0	0	0	0	0	0	0	0	0	0	0	0	0	0	0	0	0	0	0	0	0	0	0	0	0	0	0	0	0	0	0	0	0.1275	0	0	0	0	0	0	0	0	0	0	0	0
Solyc00g094520	11.995	Expressed	0.123333	0.92	0.4975	0.8875	0.36	0.3975	0.3775	0.355	0.31	0.4125	0.3	0.2975	0.365	0.3925	0.705	1.02	1.72	2.23	0.6275	0.735	0.49	0.48	0.455	0.5475	0.605	0.37	0.2875	0.31	0.4475	0.4325	0.555	0.8325	0.553333	5.41	0.57	0.685	0.29	0.2875	0.425	0.345	0.2575	0.4925	0.375	0.47	0.5725	0.4725	0.475
Solyc00g094530	20.5825	Expressed	0	1.7275	0.815	1.345	0.48	0.595	0.51	0.625	0.465	0.5775	0.51	0.4575	0.4975	0.5775	0.91	1.7325	0.173333	3.45	0.795	1.0525	0.5525	0.63	0.5875	0.82	0.7225	0.5475	0.48	0.565	0.755	0.3925	0.5925	1.2775	0.2	0.92	0.745	0.8275	0.485	0.35	0.6575	0.5325	0.3425	0.565	0.7275	0.6975	0.8325	0.6175	0.655
Solyc00g094540	1.03	Expressed	0.03	0	0.03	0	0.0325	0	0	0	0	0	0	0	0.03	0	0.0625	0	0.03	0	0.07	0	0	0	0	0	0	0	0.0675	0	0	0.02	0.105	0.0125	0.06	0.163333	0	0.0225	0.0325	0	0.0525	0	0	0	0.0825	0	0	0.0175	0.0175
Solyc00g094550	9.575	Expressed	0	0.69	0.245	0.64	0.0475	0.0875	0.08	0.06	0.1375	0.185	0.0725	0.07	0.045	0.0925	0.1725	0.2975	0.03	1.255	0.1075	0.1	0.1675	0.0875	0.145	0.1775	0.1275	0.12	0.075	0.06	0.1225	0.155	0.0775	0.5525	0.176667	0.0433333	0.4125	0.1425	0.13	0.09	0.1925	0.0725	0.03	0.0875	0.0575	0.0975	0.33	0.0425	0.1825
Solyc00g094850	2.7625	Expressed	0	0	0	0	0	0	0	0	0	0	0	0	0	0	0	0	0	0	0	0	0	0.03	0	0	0	0	0	0	0	0	0	0	0	0	0	0.245	0	0	0	0.0225	0	0	0	0	0.035	0	0
Solyc00g095450	0		0	0	0	0	0	0	0	0	0	0	0	0	0	0	0	0	0	0	0	0	0	0	0	0	0	0	0	0	0	0	0	0	0	0	0	0	0	0	0	0	0	0	0	0	0	0	0
Solyc00g095460	0		0	0	0	0	0	0	0	0	0	0	0	0	0	0	0	0	0	0	0	0	0	0	0	0	0	0	0	0	0	0	0	0	0	0	0	0	0	0	0	0	0	0	0	0	0	0	0
Solyc00g095760	13.6875	Expressed	1.45667	13.6875	4.345	0.4375	0.025	1.0075	0.35	0.2575	0.1675	0	0.03	0.11	0.0525	0.065	0.145	0	1.33	8.4775	3.045	0.185	0	1.1075	0.2125	0.0575	0.07	0.04	0	0.02	0	0	0	0	0.0233333	0.613333	0.0875	0.2125	0	0.1475	0.0775	0.0325	0	0	0	0	0	0	0
Solyc00g095860	536.53	Expressed	0.07	11.4925	6.36	1.115	2.5475	25.105	12.4275	2.59	18.8	15.63	10.2625	36.94	37.315	41.9325	32.2675	14.4025	0.0333333	5.8625	0.8475	0.185	0.2075	1.47	0.24	0.085	0.33	0.3025	0.1	1.8625	0.88	0.4075	0.75	2.1225	7.41333	2.37333	0.5325	3.3675	1.3525	0.52	0.36	0.2	0.375	0.1425	0.09	0.5875	0.2525	0.21	0.185
Solyc00g096060	0.0933333		0	0	0	0	0	0	0	0	0	0	0	0	0	0	0	0	0	0	0	0	0	0	0	0	0	0	0	0	0	0	0	0	0	0	0	0	0	0	0	0	0	0	0	0	0	0	0
Solyc00g096460	6.1225	Expressed	0	1.175	1.405	1.095	3.4625	2.2025	2.8	2.8875	2.9175	2.905	3.7075	2.64	3.565	2.815	3.5075	4.195	0	1.06	1.4675	3.7925	2.695	3.0675	3.3975	2.675	3.005	3.1125	2.515	2.7025	2.575	3.02	2.3425	3.6575	0	0	2.1175	2.545	2.75	4.6325	4.415	4.0625	3.115	2.4075	3.0525	3.2625	2.9375	2.6925	3.14
Solyc00g097260	0.08		0	0	0	0	0	0	0	0	0	0	0	0	0	0	0	0	0	0	0	0	0	0	0	0	0	0	0	0	0	0	0	0	0	0	0	0	0	0	0	0	0	0	0	0	0	0	0
Solyc00g097760	0.0525		0	0	0	0	0	0	0	0	0	0	0	0	0	0	0	0	0	0	0	0	0	0	0	0	0	0	0	0	0	0	0	0	0	0	0	0	0	0	0.025	0	0	0	0	0	0	0	0
Solyc00g097960	5.705	Expressed	0	5.705	3.2025	2.3225	2.565	1.93	2.095	2.7925	1.755	2.565	2.5125	1.3975	0.9325	0.7575	1.005	1.32	0.0666667	4.9925	2.3775	1.9925	1.22	1.455	1.255	1.3925	1.525	1.5275	1.29	0.5425	0.4475	0.665	0.645	0.96	0	0.0666667	3.1775	3.0775	1.5925	1.3725	1.5825	2.355	0.8175	0.4275	0.5375	0.5825	0.35	0.42	0.6075
Solyc00g098560	42.4375	Expressed	7.01333	16.165	13.8	36.3475	22.3425	14.75	15.565	18.81	18.1225	19.695	20.8925	14.185	11.1475	12.38	10.665	7.375	2.64	16.355	15.315	18.6125	18.115	13.155	13.7075	12.97	13.0425	11.955	13.67	9.1925	7.3175	8.8825	5.44	5.7775	2.26667	0.42	31.265	29.1175	25.22	15.34	16.5225	17.7925	6.3375	7.0875	6.5525	5.1	4.6875	4.6725	4.84
Solyc00g099160	0.116667		0	0	0	0	0	0	0	0	0	0	0	0	0	0	0	0	0	0	0	0	0	0	0	0	0	0	0	0	0	0	0	0	0.03	0.08	0	0	0	0	0	0	0	0	0	0	0.0325	0	0
Solyc00g099460	0.116667		0	0	0	0	0	0	0	0	0	0	0	0	0	0	0	0	0.0666667	0	0	0	0	0	0	0	0	0	0	0	0	0	0	0	0	0	0	0	0	0	0	0	0	0	0	0	0	0	0
Solyc00g099470	0		0	0	0	0	0	0	0	0	0	0	0	0	0	0	0	0	0	0	0	0	0	0	0	0	0	0	0	0	0	0	0	0	0	0	0	0	0	0	0	0	0	0	0	0	0	0	0
Solyc00g099570	0		0	0	0	0	0	0	0	0	0	0	0	0	0	0	0	0	0	0	0	0	0	0	0	0	0	0	0	0	0	0	0	0	0	0	0	0	0	0	0	0	0	0	0	0	0	0	0
Solyc00g099580	2.13	Expressed	0	0.905	0.3075	0.145	0.06	0.055	0.0575	0.0875	0	0.0325	0.03	0.0475	0.03	0	0	0	0	0.6375	0.0475	0.19	0.0225	0	0	0	0	0	0	0	0	0	0	0	0	0	0.075	0.2525	0.1275	0	0.0575	0.02	0.0525	0.025	0	0	0	0	0
Solyc00g099880	0.035		0	0	0	0	0	0	0	0	0	0	0	0	0	0	0	0	0	0	0	0	0	0	0	0	0	0	0	0	0	0	0	0	0	0	0	0	0	0	0	0	0	0	0	0	0.035	0	0
Solyc00g100880	1.0175	Expressed	0	0	0	0	0	0.03	0	0	0	0	0	0	0	0	0	0	0	0	0	0	0.0525	0	0	0	0	0	0	0	0	0	0	0	0.03	0	0	0	0.42	0.16	0.37	0.04	0.0575	0.025	0.025	0.0225	0.035	0.055	0
Solyc00g101700	0.045		0	0	0	0	0	0	0	0	0	0	0	0.0225	0	0	0	0	0	0	0	0	0	0	0	0	0	0	0	0	0	0	0	0	0	0	0	0	0	0	0	0	0	0	0	0	0	0	0
Solyc00g102000	0.045		0	0	0	0	0	0	0	0	0	0	0	0	0	0	0	0	0	0	0	0	0	0	0	0	0.025	0	0	0	0	0	0	0	0	0	0	0	0	0	0	0	0	0	0.03	0	0	0	0
Solyc00g102400	4.2975	Expressed	0.0833333	0.5775	0.845	1.3025	3.715	3.045	3.93	4.2975	3.3825	3.42	3.2975	2.47	1.665	1.5575	1.02	0.6225	0.0333333	0.4975	0.4175	2.52	2.1675	2.8975	2.215	2.765	1.725	1.1875	1.17	0.7375	0.7375	0.745	0.345	0.365	0.08	0	0.19	0.5825	0.2275	0.185	0.13	0.2175	0.06	0.0275	0.1025	0.0775	0.0625	0.075	0.02
Solyc00g104200	0.116667		0	0	0	0	0	0	0	0	0	0	0	0	0	0	0	0	0	0	0	0	0	0	0	0	0	0	0	0	0	0	0	0	0	0.0333333	0	0	0	0	0	0	0	0	0	0	0	0	0
Solyc00g104210	0.116667		0	0	0	0	0	0	0	0	0	0	0	0	0	0	0	0	0	0	0	0	0	0	0	0	0	0	0	0	0	0	0	0	0	0.116667	0	0	0	0	0	0	0	0	0	0	0	0	0
Solyc00g104310	0		0	0	0	0	0	0	0	0	0	0	0	0	0	0	0	0	0	0	0	0	0	0	0	0	0	0	0	0	0	0	0	0	0	0	0	0	0	0	0	0	0	0	0	0	0	0	0
Solyc00g104320	0		0	0	0	0	0	0	0	0	0	0	0	0	0	0	0	0	0	0	0	0	0	0	0	0	0	0	0	0	0	0	0	0	0	0	0	0	0	0	0	0	0	0	0	0	0	0	0
Solyc00g104330	0		0	0	0	0	0	0	0	0	0	0	0	0	0	0	0	0	0	0	0	0	0	0	0	0	0	0	0	0	0	0	0	0	0	0	0	0	0	0	0	0	0	0	0	0	0	0	0
Solyc00g104630	0		0	0	0	0	0	0	0	0	0	0	0	0	0	0	0	0	0	0	0	0	0	0	0	0	0	0	0	0	0	0	0	0	0	0	0	0	0	0	0	0	0	0	0	0	0	0	0
Solyc00g104730	0		0	0	0	0	0	0	0	0	0	0	0	0	0	0	0	0	0	0	0	0	0	0	0	0	0	0	0	0	0	0	0	0	0	0	0	0	0	0	0	0	0	0	0	0	0	0	0
Solyc00g104740	0.0675		0	0	0	0	0	0	0	0	0	0.0325	0	0	0	0	0	0	0	0	0	0	0	0	0	0	0	0	0	0	0	0	0	0	0	0	0	0	0	0	0	0	0	0	0	0	0	0	0
Solyc00g104940	0.0275		0	0	0	0	0	0	0	0	0	0	0	0	0	0	0	0	0	0	0	0	0	0	0	0	0	0	0	0	0	0	0	0	0	0	0	0	0	0.025	0	0	0	0	0	0	0	0	0
Solyc00g105340	0.9125		0	0	0	0.0275	0	0.0975	0.035	0.06	0	0	0	0.0475	0	0.035	0.0475	0	0	0.0225	0.0275	0.0275	0.0525	0	0.0625	0.075	0.025	0	0.035	0.0425	0.035	0	0	0	0	0	0.0425	0.215	0.095	0.225	0.1225	0.07	0.1375	0.1225	0.0775	0.195	0	0.065	0.1975
Solyc00g105350	0.54		0	0	0	0	0.0275	0.045	0.0225	0.0275	0	0	0	0.0225	0	0	0.03	0.0225	0	0	0	0	0.0275	0	0	0.14	0	0	0.02	0.0225	0.035	0	0	0.0375	0	0	0	0.175	0.1275	0.1125	0.2275	0.0875	0.08	0.09	0.1425	0.065	0.035	0.0275	0.1625
Solyc00g105750	0.175		0	0	0	0.0225	0	0.175	0.0325	0.0575	0.105	0.0475	0.045	0	0.0975	0.0225	0	0.0575	0	0.0325	0	0.0825	0	0.03	0	0	0	0.015	0.05	0.0225	0.02	0	0.0575	0	0	0	0.05	0	0	0	0.05	0	0	0	0.105	0	0.0325	0.0225	0
Solyc00g106650	5.265	Expressed	0	0.86	1.675	1.005	3.67	2.0375	2.5575	4.1975	2.1	2.9425	3.56	2.2525	3.1775	3.8475	3.025	3.9175	0	1.25	1.64	3.83	2.6325	1.7325	1.65	2.58	1.835	2.7575	2.6675	1.6125	3.2375	2.33	2.605	4.925	0	0	1.19	2.72	2.5775	1.78	2.91	3.9425	2.2775	2.9025	3.3075	1.935	2.7	3.9675	2.49
Solyc00g107050	7.71	Expressed	0	0.0475	0	0	0	0	0	0	0	0	0	0	0	0	0	0	0	0.345	0.2975	0.0825	0	0	0	0	0	0	0	0	0	0	0	0	0	0	1.635	0.605	0	0	0	0	0	0	0	0	0.0275	0	0
Solyc00g107550	0		0	0	0	0	0	0	0	0	0	0	0	0	0	0	0	0	0	0	0	0	0	0	0	0	0	0	0	0	0	0	0	0	0	0	0	0	0	0	0	0	0	0	0	0	0	0	0
Solyc00g108550	2.0825	Expressed	0	0.1325	0.255	0.075	0.11	0.085	0.0225	0.12	0.05	0.0575	0.1425	0.025	0.0225	0.0525	0.085	0.1825	0	0.2025	0.115	0.26	0.1075	0.0325	0.0275	0.085	0.0625	0	0	0.0425	0.02	0.055	0.05	0.1575	0.03	0.36	0.125	0.08	0.03	0.1375	0.025	0.0925	0.0225	0.24	0.145	0.0625	0.2625	0.0475	0.04
Solyc00g109450	0.0775		0	0	0	0	0	0	0	0	0	0	0	0	0	0	0	0	0	0	0	0	0	0	0	0	0	0	0	0	0	0	0	0	0	0	0	0	0	0	0	0	0	0	0	0	0	0	0
Solyc00g109850	0		0	0	0	0	0	0	0	0	0	0	0	0	0	0	0	0	0	0	0	0	0	0	0	0	0	0	0	0	0	0	0	0	0	0	0	0	0	0	0	0	0	0	0	0	0	0	0
Solyc00g109860	0.27		0	0	0	0.0275	0	0	0.0225	0	0	0	0	0	0	0	0	0	0	0	0	0.0575	0	0	0.0325	0.0675	0	0	0.02	0	0	0	0	0	0	0	0	0	0	0	0	0	0	0	0	0	0	0	0
Solyc00g110060	0.08		0	0	0	0	0	0	0	0	0	0	0	0	0	0	0	0	0	0	0	0	0	0	0	0	0	0	0	0	0	0	0	0.0125	0	0	0.0175	0	0	0	0	0.0275	0	0	0	0.02	0	0	0.025
Solyc00g110070	0		0	0	0	0	0	0	0	0	0	0	0	0	0	0	0	0	0	0	0	0	0	0	0	0	0	0	0	0	0	0	0	0	0	0	0	0	0	0	0	0	0	0	0	0	0	0	0
Solyc00g110370	4.89	Expressed	0	0	0	0.025	0.415	0.37	0.6825	0.7325	0.2875	0.4125	0.72	0.045	0.0225	0.155	0.07	0	0	0	0	0.165	0.2175	0.6275	0.39	1.9275	1.2125	1.005	1.76	0.14	0.1225	0.125	0	0	0	0	0	1.3325	0.3575	0	0	0.065	0	0.0825	0	0	0	0	0
Solyc00g110870	6.9275	Expressed	0.0633333	6.9275	5.6375	1.73	1.275	1.335	1.0725	1.2875	0.415	0.69	0.5725	0.1375	0.1525	0.0825	0.0475	0.0875	0	5.0425	1.7075	1.315	0.62	0.4525	0.35	0.3325	0.13	0.2625	0.23	0.0425	0.1325	0.1075	0.085	0.175	0.09	0.206667	1.0225	0.64	0.59	0.415	0.485	0.3875	0.215	0.115	0.16	0.11	0.165	0.1125	0.1725
Solyc00g111170	0.035		0	0	0	0	0	0.0225	0.035	0	0	0	0	0.0225	0	0	0	0	0	0	0	0	0	0	0	0	0	0	0	0	0	0	0	0.0125	0	0	0	0	0	0	0	0	0	0	0	0.02	0	0	0
Solyc00g111270	0.1125		0	0	0	0	0.1125	0	0.045	0.03	0	0.08	0	0.025	0	0	0	0	0	0	0	0.0525	0.05	0.0925	0.065	0.0975	0	0.025	0.0525	0	0	0.025	0.0225	0.0125	0	0	0	0	0	0.02	0	0	0	0.03	0	0	0	0	0
Solyc00g111370	0.0625		0	0	0	0	0	0	0	0	0	0	0	0	0	0	0	0	0	0	0	0	0	0	0	0	0	0	0	0	0	0	0	0	0	0	0	0	0	0	0	0	0	0.03	0	0	0	0	0
Solyc00g111770	1.49	Expressed	0	0.0225	0	0	0	0	0	0	0	0	0	0	0	0	0	0	0	0.1	0	0	0	0	0	0	0	0	0	0	0	0	0	0	0	0	0.025	0	0	0	0	0	0	0	0	0	0	0	0
Solyc00g111780	0.46		0	0.0325	0	0	0	0	0	0.0325	0	0	0	0	0	0.0275	0	0	0	0.1975	0	0	0	0	0	0	0	0	0	0	0	0	0	0	0	0	0.085	0	0	0	0.0225	0	0	0	0	0	0.0325	0	0
Solyc00g112180	3.6	Expressed	0	0.045	0.0675	0.245	0	0.0525	0	0.0275	0.0275	0.0625	0	0.0675	0.0275	0.0925	0.075	0.03	0	0.0825	0.0475	0.025	0.0275	0.03	0.03	0	0.0675	0.015	0	0.0425	0	0.0675	0.0275	0.0375	0.03	0	0.11	0	0	0	0.075	0.175	0.0275	0.025	0.055	0.1175	0.0675	0.1025	0.0175
Solyc00g112190	4.04	Expressed	0.03	0.065	0.0675	0.2725	0	0.0525	0	0.0275	0.0275	0.0625	0.0225	0.0675	0.0275	0.0925	0.075	0.03	0.03	0.115	0.07	0.0525	0.0525	0.03	0.03	0	0.0675	0.015	0	0.0425	0	0.0675	0.0275	0.0375	0.113333	0.0833333	0.1625	0	0	0	0.075	0.175	0.0275	0.025	0.0875	0.1175	0.0675	0.1025	0.04
Solyc00g112490	0		0	0	0	0	0	0	0	0	0	0	0	0	0	0	0	0	0	0	0	0	0	0	0	0	0	0	0	0	0	0	0	0	0	0	0	0	0	0	0	0	0	0	0	0	0	0	0
Solyc00g112500	0.0575		0	0	0	0	0	0	0	0	0	0	0	0	0	0	0	0	0	0	0	0	0	0	0	0	0	0	0	0	0	0	0	0	0	0	0	0	0	0	0	0	0	0	0	0	0	0	0
Solyc00g112600	0.045		0	0	0	0	0	0	0	0	0	0	0	0	0	0	0	0	0	0	0	0	0	0	0	0	0	0	0	0	0	0	0	0	0	0	0.0175	0	0	0	0	0	0	0	0	0	0	0	0
Solyc00g112700	0		0	0	0	0	0	0	0	0	0	0	0	0	0	0	0	0	0	0	0	0	0	0	0	0	0	0	0	0	0	0	0	0	0	0	0	0	0	0	0	0	0	0	0	0	0	0	0
Solyc00g112710	0		0	0	0	0	0	0	0	0	0	0	0	0	0	0	0	0	0	0	0	0	0	0	0	0	0	0	0	0	0	0	0	0	0	0	0	0	0	0	0	0	0	0	0	0	0	0	0
Solyc00g112810	0		0	0	0	0	0	0	0	0	0	0	0	0	0	0	0	0	0	0	0	0	0	0	0	0	0	0	0	0	0	0	0	0	0	0	0	0	0	0	0	0	0	0	0	0	0	0	0
Solyc00g112820	0		0	0	0	0	0	0	0	0	0	0	0	0	0	0	0	0	0	0	0	0	0	0	0	0	0	0	0	0	0	0	0	0	0	0	0	0	0	0	0	0	0	0	0	0	0	0	0
Solyc00g112830	0.035		0	0.0225	0	0	0	0	0	0	0	0	0.0275	0	0	0	0	0	0	0.02	0	0.0275	0.0225	0	0.035	0.035	0	0	0	0	0	0	0	0.0125	0	0	0	0	0	0	0	0	0	0	0	0	0	0	0
Solyc00g112930	0.795		0	0.1025	0.125	0.05	0.195	0.6075	0.585	0.3225	0.4825	0.265	0.3825	0.0925	0.05	0	0.025	0.0575	0	0.24	0.2475	0.1625	0.4725	0.45	0.385	0.6875	0.325	0.285	0.4075	0.02	0.075	0	0.08	0.0225	0	0	0.07	0.0725	0.0325	0.0225	0.0725	0.1275	0.025	0.0275	0.0275	0	0	0.0225	0
Solyc00g113230	0.0425		0	0	0	0	0	0	0	0	0	0	0	0	0	0	0	0	0	0	0	0	0	0	0	0	0	0	0	0	0	0	0	0	0	0	0	0	0	0	0	0	0	0	0	0	0	0	0
Solyc00g113330	0.0825		0	0	0	0	0	0	0	0	0	0	0	0	0	0	0	0	0	0	0	0	0	0	0	0	0	0	0	0	0	0	0	0	0	0	0	0.0575	0	0	0	0	0	0	0	0	0	0	0
Solyc00g113730	0		0	0	0	0	0	0	0	0	0	0	0	0	0	0	0	0	0	0	0	0	0	0	0	0	0	0	0	0	0	0	0	0	0	0	0	0	0	0	0	0	0	0	0	0	0	0	0
Solyc00g113740	0		0	0	0	0	0	0	0	0	0	0	0	0	0	0	0	0	0	0	0	0	0	0	0	0	0	0	0	0	0	0	0	0	0	0	0	0	0	0	0	0	0	0	0	0	0	0	0
Solyc00g113750	0.0266667		0	0	0	0	0	0	0	0	0	0	0	0	0	0	0	0	0	0	0	0	0	0	0	0	0	0	0	0	0	0	0	0	0	0	0	0	0	0	0	0	0	0	0	0	0	0	0
Solyc00g114550	0.0525		0	0	0	0	0	0	0	0	0	0	0	0	0	0	0	0	0	0	0	0	0	0	0	0	0	0	0	0	0	0	0	0	0	0	0	0	0	0	0	0	0	0	0	0	0	0	0
Solyc00g116150	0.485		0	0	0	0	0	0	0	0	0	0	0	0	0	0	0	0	0	0	0	0	0	0	0	0	0	0	0	0	0	0	0	0	0	0	0	0.03	0	0	0	0	0.0275	0	0	0	0	0	0
Solyc00g117450	0.055		0	0.055	0	0	0	0	0	0	0	0	0	0	0.0225	0	0	0	0	0.0275	0.0275	0	0	0	0	0	0	0	0	0	0	0	0	0	0	0	0	0	0	0	0	0	0	0	0	0	0	0	0
Solyc00g117650	0		0	0	0	0	0	0	0	0	0	0	0	0	0	0	0	0	0	0	0	0	0	0	0	0	0	0	0	0	0	0	0	0	0	0	0	0	0	0	0	0	0	0	0	0	0	0	0
Solyc00g118680	2.8925	Expressed	1.34	0.5125	0.3325	0.8375	0.6875	0.5025	0.5775	0.85	0.3425	0.6675	0.8175	0.7	0.655	0.67	0.66	1.0375	1.80333	0.395	0.545	1.0025	0.79	0.5675	0.6725	0.545	0.295	0.48	0.6425	0.5375	0.58	0.52	0.585	1.1425	0.54	0.333333	0.68	0.425	0.58	0.82	1.285	0.89	0.3625	0.6425	0.885	0.6125	0.9625	0.4775	0.5575
Solyc00g118690	54.4875	Expressed	0.116667	2.365	1.8225	2.88	3.145	3.965	4.4175	3.3475	3.8325	3.195	4.56	4.2525	4.1275	4.3375	5.2175	5.6275	0.0966667	5.9625	3.78	5.66	6.9125	3.0575	6.2375	4.92	5.75	5.4975	5.175	4.8625	5.58	4.2325	4.0325	4.9525	1.33667	0.86	4.085	5.87	6.705	3.36	6.9875	6.52	3.7475	4.9	3.955	4.6725	4.4125	3.335	2.805
Solyc00g120120	0		0	0	0	0	0	0	0	0	0	0	0	0	0	0	0	0	0	0	0	0	0	0	0	0	0	0	0	0	0	0	0	0	0	0	0	0	0	0	0	0	0	0	0	0	0	0	0
Solyc00g120820	0		0	0	0	0	0	0	0	0	0	0	0	0	0	0	0	0	0	0	0	0	0	0	0	0	0	0	0	0	0	0	0	0	0	0	0	0	0	0	0	0	0	0	0	0	0	0	0
Solyc00g120830	0		0	0	0	0	0	0	0	0	0	0	0	0	0	0	0	0	0	0	0	0	0	0	0	0	0	0	0	0	0	0	0	0	0	0	0	0	0	0	0	0	0	0	0	0	0	0	0
Solyc00g120930	0		0	0	0	0	0	0	0	0	0	0	0	0	0	0	0	0	0	0	0	0	0	0	0	0	0	0	0	0	0	0	0	0	0	0	0	0	0	0	0	0	0	0	0	0	0	0	0
Solyc00g121230	0.1525		0	0	0	0	0.0625	0	0.065	0.0625	0	0.0575	0.0525	0.0475	0.045	0.065	0	0	0	0	0	0	0	0.03	0	0.0325	0	0	0	0.0425	0.02	0	0.0225	0.025	0	0	0.025	0	0.03	0	0.0225	0.04	0.0225	0	0	0	0.0275	0.0175	0.0175
Solyc00g121730	0.0775		0	0	0	0	0	0	0	0	0	0	0	0	0	0	0	0	0	0	0	0	0	0	0	0	0	0	0	0	0	0	0	0	0	0	0	0	0	0	0	0	0	0	0	0	0.0275	0	0
Solyc00g122530	0		0	0	0	0	0	0	0	0	0	0	0	0	0	0	0	0	0	0	0	0	0	0	0	0	0	0	0	0	0	0	0	0	0	0	0	0	0	0	0	0	0	0	0	0	0	0	0
Solyc00g123030	0		0	0	0	0	0	0	0	0	0	0	0	0	0	0	0	0	0	0	0	0	0	0	0	0	0	0	0	0	0	0	0	0	0	0	0	0	0	0	0	0	0	0	0	0	0	0	0
Solyc00g123040	0.0733333		0	0	0	0	0	0	0	0	0	0	0	0	0	0	0	0	0	0	0	0	0	0	0	0	0	0	0	0	0	0	0	0	0	0	0	0	0	0	0	0	0	0	0	0	0	0	0
Solyc00g123240	0.373333		0	0	0	0	0	0	0	0	0	0	0	0	0	0	0	0	0	0	0	0	0	0	0	0	0	0	0	0	0	0	0	0	0	0	0.1125	0.0225	0.0325	0	0	0	0	0	0	0	0	0	0
Solyc00g124840	0.0433333		0	0	0	0	0	0	0	0	0	0	0	0	0	0	0	0	0	0	0	0	0	0	0	0	0	0	0	0	0	0	0	0	0	0	0	0	0	0	0	0	0	0	0	0	0	0	0
Solyc00g124850	0		0	0	0	0	0	0	0	0	0	0	0	0	0	0	0	0	0	0	0	0	0	0	0	0	0	0	0	0	0	0	0	0	0	0	0	0	0	0	0	0	0	0	0	0	0	0	0
Solyc00g124860	0.2025		0.03	0	0	0	0	0	0	0	0	0	0	0	0	0	0	0.0275	0	0	0	0	0	0	0	0	0	0	0	0	0	0	0	0	0	0	0	0.0275	0	0	0	0	0	0.2025	0.03	0	0	0	0
Solyc00g125260	0		0	0	0	0	0	0	0	0	0	0	0	0	0	0	0	0	0	0	0	0	0	0	0	0	0	0	0	0	0	0	0	0	0	0	0	0	0	0	0	0	0	0	0	0	0	0	0
Solyc00g125270	0.0675		0	0	0	0	0	0	0	0.0275	0	0	0	0	0	0	0	0	0	0	0	0	0	0	0	0	0	0	0	0	0	0	0	0	0	0	0	0	0	0.0225	0	0	0	0	0	0.02	0	0	0
Solyc00g125580	2.9775	Expressed	0	0	0	0	0	0	0	0	0	0	0	0	0	0	0	0	0	0	0.0475	0.0275	0.05	0.03	0	0.03	0	0	0	0.0225	0	0	0.0275	0	0	0	0.55	0	0.03	0.02	0.05	0	0	0	0	0	0	0.04	0
Solyc00g125980	35.6475	Expressed	2.17	2.4075	2.135	3.76	2.69	3.485	3.34	2.4	2.94	3.6375	3.71	2.195	2.1325	1.6425	1.9025	1.695	0	5.29	5.5825	6.9175	4.1775	3.09	3.1325	3.1525	2.4775	2.5	2.915	1.95	2.155	1.3725	1.595	1.6325	0.156667	0.28	5.5	5.66	4.1375	4.0075	5.545	3.25	1.015	2.035	1.7575	1.335	1.305	1.105	0.7875
Solyc00g125990	20.8975	Expressed	0.07	1.8975	2.7175	2.32	2.4975	4.0275	5.0925	3.6475	3.715	4.2	3.87	3.59	3.6525	3.3825	3.6775	3.535	0	4.2425	5.1875	3.8225	4.585	3.975	4.61	4.5975	4.845	4.0825	4.74	3.005	3.8975	2.715	2.0225	3.2975	0.0533333	0.0833333	5.52	8.0775	6.8575	5.0925	7.245	5.5025	2.6025	3.15	3.6925	1.775	2.1675	1.63	1.2
Solyc00g126000	14.39	Expressed	0.04	1.07	2.245	0.9175	2.0475	3.7325	4.8525	3.4075	3.425	3.6625	3.5375	3.26	3.32	3.1675	3.3475	3.2	0	2.175	4.795	3.42	4.0775	3.4025	4.0425	4.0175	4.4525	3.8075	4.2775	2.8775	3.4875	2.605	1.845	2.8775	0.0533333	0.0833333	4.9	7.535	6.0425	4.83	6.8125	5.3175	2.4675	3.0025	3.39	1.5175	1.815	1.4525	1.0975
Solyc00g126010	8.355	Expressed	0	0.575	1.14	0.3225	1.15	2.335	3.335	2.3375	1.89	2.415	2.175	2.3775	1.76	1.65	1.845	1.915	0	1.29	2.87	1.9775	2.4675	1.6925	2.06	2.225	2.595	1.9925	2.5425	1.7625	2.0825	1.495	1.065	1.7475	0.0533333	0.0833333	2.7375	4.705	3.39	2.7925	4.435	3.2525	1.5475	1.685	2.155	0.9225	0.845	0.8275	0.7825
Solyc00g126420	0		0	0	0	0	0	0	0	0	0	0	0	0	0	0	0	0	0	0	0	0	0	0	0	0	0	0	0	0	0	0	0	0	0	0	0	0	0	0	0	0	0	0	0	0	0	0	0
Solyc00g126430	0		0	0	0	0	0	0	0	0	0	0	0	0	0	0	0	0	0	0	0	0	0	0	0	0	0	0	0	0	0	0	0	0	0	0	0	0	0	0	0	0	0	0	0	0	0	0	0
Solyc00g126440	0		0	0	0	0	0	0	0	0	0	0	0	0	0	0	0	0	0	0	0	0	0	0	0	0	0	0	0	0	0	0	0	0	0	0	0	0	0	0	0	0	0	0	0	0	0	0	0
Solyc00g127540	0.055		0	0	0	0	0	0	0	0	0	0	0	0	0	0	0	0	0	0	0	0	0	0	0	0	0	0	0	0	0	0	0	0	0	0	0	0	0	0	0	0	0	0	0	0	0	0	0
Solyc00g127550	0		0	0	0	0	0	0	0	0	0	0	0	0	0	0	0	0	0	0	0	0	0	0	0	0	0	0	0	0	0	0	0	0	0	0	0	0	0	0	0	0	0	0	0	0	0	0	0
Solyc00g127560	0		0	0	0	0	0	0	0	0	0	0	0	0	0	0	0	0	0	0	0	0	0	0	0	0	0	0	0	0	0	0	0	0	0	0	0	0	0	0	0	0	0	0	0	0	0	0	0
Solyc00g127660	66.0967	Expressed	12.6567	10.225	6.595	10.2075	7.51	6.0175	7.0825	7.2625	7.79	8.055	9.095	6.96	6.53	6.665	5.45	6.79	15.5167	10.985	8.025	8.5425	5.1625	5.4075	5.4125	4.8375	5.6225	6.1675	5.6275	5.8375	4.695	6.395	4.7425	6.9725	20.46	16.3233	7.72	8.0825	5.7025	7.105	6.5925	5.1475	5.075	5.3225	6.3575	5.2875	7.2575	5.2875	4.8575
Solyc00g127670	24.1867	Expressed	15.0067	8.4175	4.8125	5.305	2.97	3.095	3.3675	4.3275	3.9625	4.28	4.4225	2.365	2.115	2.105	2.495	1.79	16.8133	9.2075	3.895	3.37	2.415	3.455	2.66	3.085	2.5325	2.645	2.6225	2.01	1.5125	2.055	1.3475	1.895	6.30333	15.82	3.76	3.1925	2.6625	2.725	2.635	2.9525	0.8175	0.9625	1.4025	0.88	1.1075	1.0775	0.52
Solyc00g127870	87.36	Expressed	18.75	15.365	9.315	7.02	4.7675	5.24	5.375	5.0775	4.2325	3.79	4.0825	1.86	1.74	1.8575	1.1475	1.175	22.32	12.4925	6.945	4.0175	4.075	3.9575	3.555	3.915	2.245	2.47	1.7775	1.005	0.8425	0.93	0.465	0.5875	34.49	40.8967	5.525	4.175	3.925	3.1875	2.4325	2.5375	1.5875	1.8475	2.5575	1.02	1.0175	0.995	0.845
Solyc00g128870	96.89	Expressed	23.82	17.99	27.555	20.205	18.05	16.4075	16.8825	14.1225	17.755	19.1625	18.1175	13.3575	16.0325	16.1075	14.9725	14.85	20.3667	17.2225	22.765	18.9575	16.335	12.935	16.4725	11.7525	13.28	11.8525	14.1825	10.88	10.7775	13.2525	10.185	9.5775	8.90667	9.36333	16.61	16.785	12.9525	10.5975	9.8425	10.48	10.6475	11.1925	10.505	11.2525	12.03	10.4425	10.375
Solyc00g129670	0		0	0	0	0	0	0	0	0	0	0	0	0	0	0	0	0	0	0	0	0	0	0	0	0	0	0	0	0	0	0	0	0	0	0	0	0	0	0	0	0	0	0	0	0	0	0	0
Solyc00g129680	0.11		0	0	0	0	0	0	0	0	0	0	0	0	0	0	0	0	0.03	0	0	0	0	0	0	0	0	0.025	0	0	0	0	0	0	0	0	0	0	0	0.0225	0	0.0225	0	0.11	0	0	0	0.0275	0.025
Solyc00g129880	0.0325		0	0	0	0	0	0	0	0	0	0	0	0	0	0	0	0	0	0	0	0	0	0	0	0	0	0	0	0	0	0	0	0	0	0	0	0	0	0	0	0	0	0	0	0	0	0	0
Solyc00g129980	0		0	0	0	0	0	0	0	0	0	0	0	0	0	0	0	0	0	0	0	0	0	0	0	0	0	0	0	0	0	0	0	0	0	0	0	0	0	0	0	0	0	0	0	0	0	0	0
Solyc00g130180	0		0	0	0	0	0	0	0	0	0	0	0	0	0	0	0	0	0	0	0	0	0	0	0	0	0	0	0	0	0	0	0	0	0	0	0	0	0	0	0	0	0	0	0	0	0	0	0
Solyc00g130190	0		0	0	0	0	0	0	0	0	0	0	0	0	0	0	0	0	0	0	0	0	0	0	0	0	0	0	0	0	0	0	0	0	0	0	0	0	0	0	0	0	0	0	0	0	0	0	0
Solyc00g130290	0.0366667		0	0	0	0	0	0	0	0	0	0	0	0	0	0	0	0	0	0	0	0	0	0	0	0	0	0	0	0	0	0	0	0	0	0.0366667	0	0	0	0	0	0	0	0	0	0	0	0	0
Solyc00g130690	0.1975		0	0	0	0.0225	0	0.0325	0	0.03	0	0	0.0575	0.045	0.0225	0.0725	0.0225	0	0	0.0525	0.025	0.025	0.075	0.0625	0.0625	0.03	0.0325	0	0.0925	0.0625	0.055	0.0275	0.05	0.13	0	0	0	0.0225	0.0325	0	0.075	0	0	0	0.0575	0.02	0.0325	0	0
Solyc00g130700	0		0	0	0	0	0	0	0	0	0	0	0	0	0	0	0	0	0	0	0	0	0	0	0	0	0	0	0	0	0	0	0	0	0	0	0	0	0	0	0	0	0	0	0	0	0	0	0
Solyc00g130800	0		0	0	0	0	0	0	0	0	0	0	0	0	0	0	0	0	0	0	0	0	0	0	0	0	0	0	0	0	0	0	0	0	0	0	0	0	0	0	0	0	0	0	0	0	0	0	0
Solyc00g130810	0		0	0	0	0	0	0	0	0	0	0	0	0	0	0	0	0	0	0	0	0	0	0	0	0	0	0	0	0	0	0	0	0	0	0	0	0	0	0	0	0	0	0	0	0	0	0	0
Solyc00g131610	6.11333	Expressed	0	0	0	0	0	0	0	0	0	0	0	0	0	0	0	0	0	0	0	0	0	0	0	0	0	0	0	0	0	0	0	0	0	0	0	0	0	0	0	0	0	0	0	0	0	0	0
Solyc00g131710	0.1775		0	0	0	0	0.0275	0.0625	0	0	0	0.025	0	0	0	0	0	0	0.03	0	0	0.08	0.0325	0	0	0	0	0.025	0	0.02	0	0	0	0	0	0	0	0.055	0	0.02	0.07	0.0225	0.0225	0.025	0.0875	0	0	0	0
Solyc00g133110	1.03	Expressed	0	0.0225	0.0825	0.15	0.65	0.42	0.575	0.3625	0.77	0.665	1.03	0.635	0.52	0.59	0.445	0.4725	0	0.06	0	0.1575	0.1775	0.24	0.165	0.3225	0.2875	0.1825	0.3325	0.1725	0.125	0.455	0.0575	0.1075	0	0	0.025	0.06	0	0	0	0.02	0	0	0	0.0225	0	0	0
Solyc00g133710	0.03		0	0	0	0	0	0	0	0	0	0	0.03	0	0	0	0	0	0	0	0	0	0	0	0	0	0	0	0	0	0	0	0	0	0	0	0	0	0	0	0	0	0	0	0	0	0	0	0
Solyc00g133720	0.0675		0	0	0	0	0	0	0	0	0	0	0	0	0	0	0	0	0	0	0.0325	0	0.0325	0	0	0	0	0	0	0	0.055	0	0	0	0	0	0	0.0275	0	0	0.0275	0	0	0	0	0	0	0	0
Solyc00g134620	1.405	Expressed	0	0.1025	0.095	0.17	0.1325	0.27	0.2175	0.5125	0.41	0.34	0.5225	0.07	0.1	0.05	0.03	0.2025	0	0.0825	0.185	0.1825	0.29	0.2975	0.155	0.1075	0	0.05	0.1125	0.065	0	0.1225	0.0225	0.045	0	0	0.165	0.24	0.78	0.4325	0.395	0.425	0.105	0.215	0.08	0.0975	0.1	0.08	0.0375
Solyc00g134820	0		0	0	0	0	0	0	0	0	0	0	0	0	0	0	0	0	0	0	0	0	0	0	0	0	0	0	0	0	0	0	0	0	0	0	0	0	0	0	0	0	0	0	0	0	0	0	0
Solyc00g134830	0.035		0	0	0	0	0	0	0.035	0	0	0	0	0	0	0	0	0	0	0	0	0	0	0	0	0	0	0	0	0	0	0.0275	0	0	0	0	0	0	0	0.025	0	0	0	0	0	0	0	0	0
Solyc00g134840	0		0	0	0	0	0	0	0	0	0	0	0	0	0	0	0	0	0	0	0	0	0	0	0	0	0	0	0	0	0	0	0	0	0	0	0	0	0	0	0	0	0	0	0	0	0	0	0
Solyc00g135040	0.05		0	0	0	0.025	0	0	0	0.0275	0	0	0	0	0	0	0	0.0225	0	0	0	0	0	0	0.035	0	0	0	0	0	0	0	0	0	0	0	0	0	0	0.025	0	0	0	0	0.05	0	0	0	0
Solyc00g135050	0		0	0	0	0	0	0	0	0	0	0	0	0	0	0	0	0	0	0	0	0	0	0	0	0	0	0	0	0	0	0	0	0	0	0	0	0	0	0	0	0	0	0	0	0	0	0	0
Solyc00g135060	0		0	0	0	0	0	0	0	0	0	0	0	0	0	0	0	0	0	0	0	0	0	0	0	0	0	0	0	0	0	0	0	0	0	0	0	0	0	0	0	0	0	0	0	0	0	0	0
Solyc00g135260	0.665		0	0	0	0	0	0	0	0	0	0	0	0	0	0	0	0	0	0	0	0	0.0225	0	0	0	0	0	0	0	0	0	0	0	0	0	0	0.0725	0.1975	0	0	0	0	0	0	0.0225	0	0	0
Solyc00g136260	91.26	Expressed	42.9767	15.8675	12.1575	45.915	43.6025	14.8925	28.89	45.285	16.605	32.0975	36.6475	7.265	7.4	7.565	5.8125	2.975	25.98	14.205	9.7925	22.2825	30.82	13.5875	35.6125	37.0675	12.2325	20.45	24.425	5.0125	4.0425	5.5875	2.9475	2.075	2.50333	7.8	18.575	34.3225	36.9425	28.4375	44.4175	54.1725	1.85	3.615	6.03	1.4725	1.895	3.07	2.415
Solyc00g136560	10.9075	Expressed	0.04	0.23	0.225	0.4975	0.95	1.39	1.145	1.295	4.19	4.7275	5.8675	10.34	9.3275	10.9075	10.55	10.69	0	0.1625	0.1375	0.345	0.6375	0.9	1.1775	1.27	3.5225	4.1675	4.8825	9.7625	8.63	9.3475	10.0575	9.55	0	0	0.1025	0.2275	0.615	0.5875	0.595	0.545	2.2075	1.9425	2.6675	5.25	5.165	5.8675	9.68
Solyc00g138060	2.1775	Expressed	0	0.02	0	0	0	0	0.0225	0	0	0	0	0	0	0.03	0.0225	0.06	0.0333333	0	0	0.025	0.025	0	0	0	0.035	0	0	0.065	0.085	0.025	0.1075	0.0125	0	0.0433333	0	0.0725	0	0.025	0.025	0	0.06	0.1075	0.025	0.7425	0.2825	0.6075	0.9525
Solyc00g139760	0.0225		0	0	0	0	0	0	0	0	0	0	0	0	0	0	0	0	0	0	0	0	0	0	0	0	0	0	0	0	0	0	0	0	0	0	0	0.0225	0	0	0	0	0	0	0	0	0	0	0
Solyc00g140060	60.8775	Expressed	0	3.7275	8.8025	6.0975	34.93	38.985	44.23	37.2	41.235	44.6525	35.3025	33.5525	31.47	29.075	18.885	25.51	0.0333333	5.65	4.9	38.6575	43.3275	37.735	33.515	39.1325	29.14	30.0725	28.1425	23.075	22.3625	21.04	21.925	26.585	0.0766667	0.196667	6.845	41.4075	44.67	39.22	45.7525	48.3625	24.7075	23.025	23.0175	16.98	17.6325	14.915	14.045
Solyc00g141360	0.95		0	0.0625	0.2	0.37	0.2375	0.2625	0.115	0.2625	0.0575	0.0975	0.03	0	0	0	0	0	0	0.1025	0.25	0.27	0.2175	0.18	0.21	0.1625	0	0	0.0825	0	0	0	0	0	0	0	0.165	0.085	0.2275	0.0625	0.1575	0.2825	0	0	0.0275	0	0	0	0
Solyc00g141560	0.115		0	0	0	0	0	0	0	0	0	0	0	0	0	0	0	0	0	0	0	0	0	0	0	0	0	0	0	0	0	0	0	0	0	0	0	0	0	0	0	0	0	0	0	0	0	0	0
Solyc00g142160	4.795	Expressed	0	0.125	0.1025	0.0975	0.2175	0.16	0.2975	0.2625	0.0675	0.36	0.28	0.23	0.235	0.27	0.1775	0.3	0	0.1625	0.245	0.18	0.19	0.21	0.1475	0.1	0.215	0.205	0.11	0.19	0.21	0.0975	0.075	0.2325	0	0.0333333	0.0525	0.2875	0.3825	0.1125	0.405	0.425	0.1025	0.375	0.2825	0.18	0.3325	0.26	0.1675
Solyc00g142170	9.81	Expressed	0	0.2275	0.13	0.17	0.2425	0.3375	0.4675	0.3525	0.3325	0.5875	0.4525	0.3875	0.4425	0.4875	0.37	0.59	0	0.3525	0.4875	0.31	0.495	0.24	0.3725	0.16	0.33	0.345	0.35	0.3025	0.3875	0.235	0.1475	0.4875	0.463333	0.173333	0.1275	0.4675	0.6375	0.325	0.59	0.57	0.18	0.5575	0.6625	0.4175	0.6025	0.3625	0.3175
Solyc00g143770	4.8725	Expressed	0	1.2175	2.3625	0.7425	2.735	3	2.43	2.1475	2.265	2.4625	2.865	2.515	2.25	2.0525	2.1475	2.18	0	1.7225	2.165	4.5275	2.225	2.26	2.48	1.5225	1.6475	1.59	1.33	1.7775	1.2825	2.4575	1.2775	1.8025	0.0233333	0.0433333	1.6775	1.985	2.135	2.1125	2.52	1.355	1.1325	1.5125	1.675	0.99	1.7825	1.155	1.6825
Solyc00g144470	77.46	Expressed	0	0.305	0.73	0	0	0	0	0	0.105	0.0325	0.06	2.2025	2.5325	3.1375	4.135	9.6525	0.0333333	0.205	1.2525	0.4575	0	0.0575	0.0275	0.125	0.29	0.7375	0.43	8.135	16.1425	9.5375	10.3975	24.2725	0	0.0366667	0.0875	0	0	0	0	0	5.3275	8.145	5.4025	26.75	37.295	26.8325	36.9325
Solyc00g145170	13.8833	Expressed	0.256667	0.4225	1.3725	3.675	1.125	0.13	0.305	0.605	0.0275	0.11	0.15	0.3525	0.05	0.0525	0.0225	0	0	0.3325	0.185	0.135	0.08	0	0.1575	0.06	0	0	0	0	0	0	0	0	0	0.0366667	0.7075	0.4325	0.265	0.0475	0.1025	0.325	0	0.03	0	0	0	0	0
Solyc00g147570	4.3625	Expressed	0	0	0	0	0.0325	0	0	0.03	0	0.025	0	0	0	0	0	0	0	0.02	0.0225	0.055	0	0	0	0	0	0	0	0	0	0.03	0	0	0	0	0.075	0.665	0	0	0	0.0275	0	0	0	0	0	0	0
Solyc00g147770	4.565	Expressed	0.533333	3.6775	2.435	3.1575	2.54	2.2175	2.6175	2.69	2.22	1.96	2.205	1.4625	2.13	1.5775	2.22	1.9925	0.63	2.935	1.6	1.7625	1.805	2.6275	1.3175	2.205	1.7275	1.9725	2.3575	1.4225	1.22	1.3775	1.5975	1.7725	0	0.0433333	2.825	1.6475	1.3075	1.55	2.0625	1.835	1.3825	1.815	1.28	1.4125	1.4175	1.57	1.67
Solyc00g149970	14.25	Expressed	0	0.2925	0.45	0.2725	1.2075	1.25	1.0475	1.0825	0.6725	0.4275	1.0225	0.165	0.1275	0.145	0.03	0.0225	0	0.64	0.4775	1.77	1.97	1.3275	1.315	1.465	1.085	1.0025	0.66	0.4525	0.39	0.3625	0.3	0.07	0.24	0	1.6775	3.9925	3.75	4.3525	5.405	4.045	0.82	0.3375	0.4425	0.2175	0.1225	0.165	0.2325
Solyc00g153680	5.3175	Expressed	1.22	0.1825	0.865	1.3275	1.8025	1.175	1.205	1.5875	1.1125	1.34	1.435	0.74	0.5225	0.665	0.5975	0.2875	0	0.2375	0.3275	0.815	1.165	0.7275	1.225	1.355	0.63	0.5675	0.8075	0.3125	0.3925	0.415	0.3825	0.1875	0	0	0.05	0.6925	0.385	0.285	0.3625	0.36	0.07	0.1425	0.1075	0.1175	0.135	0.12	0.1
Solyc00g153980	1.7525	Expressed	0	0.1725	0.0475	0.05	0	0	0.0325	0.0575	0	0	0	0.045	0.045	0.0575	0.1475	0.2125	0	0.1475	0.0325	0	0	0	0	0.0625	0.06	0.04	0	0.0425	0.0525	0	0.0225	0.12	0	0	0.0875	0.0275	0.0325	0.02	0.095	0.0275	0.055	0.0575	0.1075	0.0225	0.095	0.0175	0.0625
Solyc00g154480	0.105		0	0.0225	0	0.0225	0	0.03	0	0	0.085	0.065	0	0	0	0	0	0	0	0	0	0.085	0	0	0	0.0625	0	0	0.0325	0	0.02	0	0	0.0125	0	0	0	0	0	0	0	0	0	0	0.025	0.0225	0	0	0
Solyc00g154980	3.32	Expressed	0	0	0	0.025	0	0	0	0	0	0	0	0	0	0	0	0	0	0	0.0225	0.075	0	0	0	0	0	0	0	0	0	0	0	0	0	0	0	0.67	0	0	0	0	0	0	0	0	0	0	0
Solyc00g156980	12.995	Expressed	0	4.4325	4.9375	2.1575	3.6875	1.135	1.7925	1.265	0.0825	0.0975	0.265	0	0	0	0	0	0	4.2425	2.1625	1.8375	0.31	0.03	0	0.0575	0	0	0	0	0	0	0	0	0	0.333333	1.075	2.315	0.3925	0	0.025	0.0625	0.0525	0.03	0	0	0	0	0
Solyc00g157080	4.6325	Expressed	0	0	0.0775	0.025	0	0.055	0.0325	0	0	0	0	0	0	0	0	0	0	0	0.07	0.1075	0.16	0.03	0	0	0.025	0.03	0	0	0.055	0	0	0	0	0	0	0	0	0.0225	0	0	0	0	0	0	0	0	0
Solyc00g157180	42.2675	Expressed	0.116667	0.345	0.4675	0.7275	0.64	0.475	0.345	0.565	0.265	0.2875	0.8725	0.5525	0.8925	0.7225	0.6225	0.6625	0	0.58	1.0625	0.5775	0.505	0.2375	0.035	0.175	0.095	0	0.0775	0.11	0.02	0.0525	0.0275	0.0875	0	0	5.895	12.16	1.1575	0.065	0.38	0.2675	0.16	0.0625	0.075	0.055	0.1025	0.0425	0.0175
Solyc00g160780	12	Expressed	1.61	12	5.35	2.795	0.7675	0.3275	0.37	0.445	0.0775	0.16	0.05	0	0	0	0	0	0.17	8.1	2.19	1.1075	0.5475	0.34	0.2675	0.29	0.06	0.025	0.0325	0	0.02	0	0	0	0.216667	0.296667	1.39	0.2875	0.065	0	0.0575	0.02	0	0	0	0	0	0	0
Solyc00g163580	0.0625		0	0	0	0	0	0	0	0	0	0	0	0	0	0	0	0	0	0	0	0	0	0	0	0	0	0	0	0	0	0	0	0	0	0	0	0	0.0625	0	0.0275	0	0	0	0	0.0225	0	0	0
Solyc00g164580	3.47667	Expressed	0	0.0225	0.025	0	0.08	0.0525	0.0575	0.0275	0.05	0	0.1825	0.0225	0.0275	0.0275	0.2275	0.1475	0	0	0.06	0	0	0.0925	0	0	0.035	0.045	0.1375	0.04	0.06	0.1025	0.165	0.265	0.0533333	0	0.0675	0	0.0975	0.0225	0.13	0.04	0.03	0	0.2575	0.075	0.31	0	0.135
Solyc00g164680	88.1367	Expressed	7.82333	3.6325	10.995	8.71	13.845	15.365	10.81	11.05	12.885	12.885	13.525	20.36	19.1975	18.7425	20.1275	24.625	7.51	5.425	13.04	16.625	18.315	9.445	11.8525	12.4725	11.385	13.075	13.985	15.785	19.8425	14.0375	20.1675	24.5675	1.50667	1.35	17.6475	19.8625	19.845	11.1875	12.7425	16.5125	8.545	10.865	8.2275	7.3275	6.105	6.79	8.335
Solyc00g165080	0.0825		0	0	0	0	0	0	0	0	0	0	0	0	0	0	0	0	0	0	0	0	0	0	0	0	0	0	0	0	0	0	0	0	0	0	0	0	0	0.0225	0	0	0.0225	0.0825	0	0	0	0.0175	0.0175
Solyc00g165090	0.205		0	0	0	0	0	0	0	0	0	0	0	0	0	0	0	0	0	0	0	0	0	0	0	0	0	0	0	0	0	0	0	0	0	0	0	0	0	0.0225	0.075	0.04	0.05	0.025	0	0	0.035	0	0.02
Solyc00g165190	0.0275		0	0	0	0	0	0	0	0	0	0	0	0	0	0	0	0	0	0	0	0	0	0	0	0	0	0	0	0	0	0	0	0	0	0	0	0	0	0	0	0	0	0.0275	0	0	0	0	0
Solyc00g166190	0		0	0	0	0	0	0	0	0	0	0	0	0	0	0	0	0	0	0	0	0	0	0	0	0	0	0	0	0	0	0	0	0	0	0	0	0	0	0	0	0	0	0	0	0	0	0	0
Solyc00g166490	0.545		0.04	0	0.025	0.1475	0.1475	0.0225	0.0225	0.0925	0.0275	0	0	0	0	0	0.03	0	0	0	0.0525	0.05	0.1125	0.09	0.03	0.0575	0	0	0	0	0	0	0.0275	0.025	0	0	0	0.0275	0	0	0	0	0	0	0	0	0	0	0
Solyc00g166690	0.05		0	0	0	0	0	0	0	0	0	0	0	0	0.03	0	0	0	0	0	0	0	0.0275	0	0	0	0	0	0	0	0	0	0	0	0	0	0	0	0	0	0	0	0	0.0325	0	0	0	0	0
Solyc00g167290	0		0	0	0	0	0	0	0	0	0	0	0	0	0	0	0	0	0	0	0	0	0	0	0	0	0	0	0	0	0	0	0	0	0	0	0	0	0	0	0	0	0	0	0	0	0	0	0
Solyc00g167300	0		0	0	0	0	0	0	0	0	0	0	0	0	0	0	0	0	0	0	0	0	0	0	0	0	0	0	0	0	0	0	0	0	0	0	0	0	0	0	0	0	0	0	0	0	0	0	0
Solyc00g167800	0.05		0	0	0	0	0	0	0	0	0	0	0	0	0	0	0	0	0	0	0	0	0	0	0	0	0	0	0	0	0	0	0	0	0	0	0	0.03	0	0	0	0	0	0	0	0	0	0	0
Solyc00g168200	12.5375	Expressed	0.376667	2.3125	1.4175	3.32	7.8775	5.5225	5.3525	7.88	5.08	5.2125	5.2575	1.61	1.1175	1.1675	0.7	0.525	0	2.4425	1.5375	6.03	5.3775	4.0925	3.9575	5.5525	2.64	1.405	3.2225	0.785	0.3125	0.4575	0.305	0.44	0.13	0	3.4775	8.95	7.0925	9.9525	10.4725	9.935	1.6125	1.545	2.1825	0.1825	0.2825	0.275	0.165
Solyc00g170200	8.67333	Expressed	4.06333	0.5425	0.1025	0	0	0.0225	0.0475	0	0	0.0325	0	0	0	0	0.0225	0	0.57	0.35	0	0	0	0	0	0.025	0	0.025	0.02	0	0	0.0425	0	0	0.626667	1.1	0	0.03	0	0.02	0	0	0	0	0	0	0	0	0
Solyc00g170210	129.14	Expressed	34.6667	14.15	10.925	17.33	6.985	7.5825	7.8675	6.7925	7.9125	7.685	7.645	6.2775	7.76	5.805	6.9175	8.605	36.93	15.7225	13.2575	10.2075	7.5075	6.38	8.6575	6.64	6.2075	5.6925	5.6675	5.1	4.2975	4.7675	5.39	5.9225	49.3967	43.3067	12.55	9.3375	6.6475	7.4675	8.54	7.0525	5.635	7.1075	7.0225	6.71	8.0175	7.8675	6.205
Solyc00g170510	45.655	Expressed	0	0.2325	0.025	0.1275	0	0	0	0	0	0	0	0	0	0	0	0	0	3.6375	0.45	0.755	0	0	0	0	0	0	0	0	0	0	0	0	0	0	2.5975	6.4175	0	0	0	0	0	0	0	0	0	0	0
Solyc00g171710	0.445		0.04	0.0425	0	0.075	0	0	0	0	0	0.0325	0	0	0	0.035	0	0.09	0.07	0.0475	0.0225	0	0	0	0	0	0	0	0	0	0	0	0	0.0125	0.0466667	0	0.025	0	0.0325	0.045	0.0225	0	0	0	0.0275	0	0	0	0
Solyc00g171810	97.375	Expressed	0.75	5.1375	1.535	7.3775	2.4075	2.5525	1.595	2.3825	1.6575	2.1775	1.81	1.0525	1.025	1.1	1.595	2.53	0.796667	10.0075	1.72	2.995	3.0425	2.1925	1.98	1.915	2.1025	1.66	2.07	1.2425	1.28	1.5575	1.1925	2.87	3.28333	2.74667	2.885	1.915	1.5925	1.1575	2.0075	1.7875	0.945	1.69	1.645	1.2575	1.67	1.3325	1.3
Solyc00g172410	1.1175	Expressed	0	0	0	0	0	0	0	0.03	0	0	0	0.025	0.0275	0	0.025	0	0	0	0.0225	0	0	0	0	0	0	0	0	0.02	0	0	0	0	0	0	0.0425	0	0	0	0.0275	0	0.0275	0.0325	0	0	0	0	0
Solyc00g173430	0.0225		0	0	0	0	0	0	0	0	0	0	0	0	0	0	0	0	0	0	0	0	0	0	0	0	0	0	0	0	0	0	0	0	0	0	0	0	0	0.0225	0	0	0	0	0	0	0	0	0
Solyc00g174330	6253.95	Expressed	0	0.1325	0.495	125.362	33.9225	54.0025	119.948	63.7025	805.75	277.812	170.067	132.95	106.567	33.9225	45.3275	9.17	0	0.8275	1.13	23.83	16.9575	5.4125	9.6525	6.2325	19.8475	11.135	7.0125	37.31	24.515	20.25	7.1475	0.3975	0.03	0	96.6575	185.868	63.17	9.6625	6.8825	3.5375	11.3075	7.9675	6.475	2.49	2.5725	15.385	1.12
Solyc00g174340	6438.89	Expressed	0	0.155	0.6625	170.382	54.6675	94.65	219.305	112.26	1425.39	479.9	287.632	232.857	172.755	58.1275	75.08	16.09	0	1.2275	1.45	35.82	31.82	9.4775	17.19	10.2525	30.5925	17.91	12.1375	66.695	35.9525	36.86	12.815	0.5425	0.03	0	129.32	273.168	116.335	16.9875	10.9575	6.74	22.7775	13.3275	9.56	4.4075	3.5475	25.57	2.1125
Solyc00g175240	0.16		0	0	0	0	0	0	0	0	0	0	0	0	0	0	0	0	0	0	0	0	0	0	0	0	0	0	0	0	0	0	0	0	0	0	0	0	0	0	0.0225	0	0	0.0325	0	0	0	0	0
Solyc00g178340	1.795	Expressed	0	0	0	0.0225	0	0	0	0	0	0	0	0	0	0	0	0	0	0	0.0275	0.025	0.025	0	0	0.035	0	0.1575	0	0	0	0.0275	0.0275	0.0125	0	0	0	0	0	0.02	0.0725	0.0475	0	0.0275	0.025	0	0.0275	0	0
Solyc00g179240	0.155		0.146667	0.155	0	0	0	0	0	0	0	0	0	0.025	0	0	0	0	0	0.0225	0	0	0	0	0	0	0	0.03	0.035	0	0	0	0	0	0	0	0	0	0.03	0	0	0	0	0	0	0	0	0	0
Solyc00g179640	13.8025	Expressed	0.03	1.71	0.765	0.6425	0.1925	0.0225	0.035	0.0575	0	0	0.0925	0.0925	0.075	0.1525	0.06	0.08	0	3.19	0.805	0.79	0.1625	0.03	0.3325	0.03	0	0.04	0	0	0.035	0.055	0	0.0475	0.116667	0.0433333	3.4125	1.7125	0.19	0.0425	0.1325	0	0	1.09	0	0.14	0.0325	0.15	0.0975
Solyc00g179840	0.0666667		0	0	0	0	0	0	0	0	0	0	0	0	0	0	0	0	0	0	0	0	0	0	0	0	0	0	0	0	0	0	0	0	0	0	0	0	0	0	0	0	0	0	0	0	0	0	0
Solyc00g180440	0.045		0	0	0	0	0	0	0	0	0	0	0	0	0	0	0	0	0	0.0225	0	0	0.025	0	0	0	0	0	0	0	0	0	0	0	0	0	0	0	0	0	0	0	0	0	0	0	0	0	0
Solyc00g180840	3.34333	Expressed	0	0	0	0	0	0	0	0	0	0	0	0	0.0275	0	0	0	0	0.1025	0.1425	0	0	0	0	0	0	0	0	0	0	0	0	0	0	0	0.3025	0.2475	0	0	0.045	0	0	0	0	0	0	0	0
Solyc00g181240	0.77		0	0.0225	0.03	0.0525	0.0875	0.1075	0	0.0275	0.05	0.0575	0.0225	0.0225	0	0.03	0.0525	0.03	0	0.04	0.1825	0	0.0325	0.03	0.0625	0.03	0.07	0.03	0	0.065	0	0.055	0.165	0.155	0.03	0	0.025	0	0.0325	0.0225	0.0575	0	0.1075	0.0275	0.1275	0.1175	0.1275	0.06	0.02
Solyc00g181250	1.7075	Expressed	0	0	0	0.0225	0	0.0225	0	0	0	0	0.03	0	0	0	0	0	0	0	0	0	0	0	0.035	0	0	0	0	0.02	0	0	0	0.0225	0	0	0	0.05	0	0	0.025	0	0.025	0	0.195	0.02	0.1625	0	0.06
Solyc00g183050	1.2775	Expressed	0.0933333	0.115	0.1125	0.1275	0.495	0.1975	0.265	0.2875	0.3225	0.175	0.4225	0.2525	0.315	0.2125	0.24	0.225	0	0.1775	0.0475	0.5	0.3575	0.36	0.255	0.27	0.54	0.395	0.475	0.69	0.5425	0.5625	0.3175	0.315	0	0	0.0425	0.3225	0.355	0.5475	0.425	0.165	0.3475	0.2225	0.585	0.2575	0.4925	0.2925	0.5425
Solyc00g183550	0.05		0	0.0325	0	0	0	0	0	0	0	0	0	0	0	0	0	0	0	0	0	0	0	0	0	0	0	0	0	0	0	0	0	0	0	0	0	0	0	0	0	0	0	0.0275	0	0	0	0	0
Solyc00g184350	6.8725	Expressed	1.69667	0.7125	1.83	1.25	3.905	4.6925	4.9175	4.5275	4.56	5.0325	4.7425	3.7625	5.19	4.955	3.2675	4.5725	0.363333	1.05	1.285	3.77	4.135	4.3875	4.235	4.8175	5.755	4.2425	5.505	4.175	4.8325	4.1	3.805	5.8375	0.976667	0.886667	1.5075	4.245	4.165	4.285	3.475	3.6225	3.0125	3.8975	3.6375	5.54	5.1975	4.16	4.885
Solyc00g185750	0.025		0	0	0	0	0	0	0	0	0	0	0	0	0	0	0	0	0	0	0	0	0	0	0	0	0	0	0	0	0	0	0	0	0	0	0	0	0	0	0	0	0	0	0	0	0	0	0
Solyc00g185850	0.025		0	0	0	0	0	0	0	0	0	0	0	0	0	0	0	0	0	0	0	0	0	0	0	0	0	0	0	0	0	0	0	0	0	0	0	0	0	0	0	0	0	0	0	0	0	0	0
Solyc00g186050	0.733333		0.113333	0	0	0.0475	0.0325	0	0.1	0	0	0	0.0275	0.045	0	0	0	0	0.0666667	0.04	0.1175	0.0525	0.0275	0.03	0.0325	0.035	0	0	0.035	0	0.02	0.0275	0	0	0.4	0.203333	0	0	0	0.045	0.025	0.02	0.025	0	0	0.0225	0.035	0.025	0.0175
Solyc00g187050	92.1775	Expressed	0.546667	63.625	34.83	2.47	0.885	1.195	2.4725	2.825	1.165	1.3125	3.97	1.36	1.535	0.5425	0.1625	0.03	0.273333	86.97	26.185	2.7725	3.11	0.56	1.2975	2.845	0.3825	0.72	1.8575	0.34	0.185	0.825	0.1625	0.0775	1.84667	0.786667	92.1775	27.47	3.99	0.9475	0.7675	1.01	0.1825	0.6425	0.595	0.5875	0.5975	0.3075	0.2475
Solyc00g188250	1.19333	Expressed	0.153333	0.1075	0.1	0.1225	0.1675	0.1775	0.2325	0.35	0.1475	0.12	0.215	0.0475	0.155	0.075	0.06	0.03	0.0333333	0.02	0.08	0.135	0.195	0.0925	0.1225	0.025	0.0675	0.0775	0.11	0.0225	0.02	0.075	0.0275	0.0125	0.0933333	0	0.05	0.1325	0.0325	0.0725	0.045	0.0225	0	0	0	0.0225	0	0	0
Solyc00g188750	0.0225		0	0	0	0	0	0	0	0	0	0	0	0.0225	0	0.0225	0.0225	0	0	0	0	0	0	0	0	0	0	0	0	0	0	0	0	0	0	0	0	0	0	0	0	0	0	0	0	0	0	0	0
Solyc00g188850	0.115		0	0	0	0	0	0	0	0	0	0	0	0	0	0	0	0	0	0	0	0	0	0	0	0	0	0	0	0	0	0	0	0	0	0	0.035	0	0	0	0	0	0	0	0	0	0	0	0
Solyc00g192150	0.0675		0	0	0	0	0	0	0	0	0	0	0	0	0	0	0	0	0	0	0	0	0	0	0	0	0	0	0	0	0	0	0	0	0	0	0	0	0	0	0.0275	0	0	0	0	0	0	0	0
Solyc00g195350	1.8375	Expressed	0	0.0225	0	0.0225	0	0	0	0	0	0	0	0.0225	0.0975	0.0575	0.2175	0.2775	0	0.02	0	0	0	0	0	0	0	0	0	0.0875	0.1525	0.0425	0.12	0.47	0	0	0.035	0	0	0	0	0	0.1975	0.5275	0.0525	1.02	1.0125	0.83	0.53
Solyc00g195360	3.255	Expressed	0	0.1275	0.32	0	0	0	0	0.0275	0	0	0	0.0675	0.12	0.2325	0.2175	0.7025	0	0.0625	0.2475	0.1075	0	0	0	0	0	0	0	0.1275	0.23	0.115	0.2375	0.85	0	0	0.025	0	0	0	0	0	0.255	1.4725	0.025	1.7275	1.54	1.1025	0.7925
Solyc00g196060	83.0675	Expressed	0.0633333	25.535	55.4925	23.7675	71.7925	79.1575	74.5525	78.515	64.5425	64.455	65.0825	52.97	57.6575	53.9775	39.87	38.99	2.23667	27.735	44.775	83.0675	76.93	69.885	63.2075	71.495	62.89	58.6	62.5875	42.7875	43.53	44.2225	39.82	46.735	0.75	0.503333	24.19	52.0225	59.9325	54.51	63.035	52.8375	30.3675	31.8575	37.375	32.9525	37.6075	34.8825	32.435
Solyc00g196460	0.09		0	0.09	0	0	0	0	0	0	0	0	0	0	0.03	0	0	0.0275	0	0	0	0	0	0	0	0	0	0.025	0	0	0	0	0	0	0	0	0.0175	0	0	0	0.0225	0	0	0.06	0	0	0	0	0
Solyc00g198360	0.055		0	0	0	0	0	0	0	0	0	0	0	0	0	0	0	0	0	0	0	0	0	0	0	0	0	0	0	0	0	0	0	0	0	0	0.0175	0	0	0	0	0	0	0	0	0	0	0	0
Solyc00g199960	0.0275		0	0	0	0	0	0	0	0	0	0	0	0	0	0	0	0	0	0	0	0	0	0	0	0	0	0	0	0	0	0	0	0	0	0	0	0	0	0	0	0	0	0	0	0	0	0	0
Solyc00g201060	0.175		0	0	0	0	0	0	0	0	0	0	0	0	0	0	0	0	0	0	0	0	0	0	0	0	0	0	0	0	0	0	0	0	0	0	0	0	0	0	0	0	0	0	0	0	0	0	0
Solyc00g201160	3.0375	Expressed	0.04	0.0325	0.0225	0	0	0.29	0.2	0.225	1.2775	0.7625	0.6875	0.57	0.56	0.2775	0.295	0.1775	0.0333333	0.0325	0.0475	0.0275	0	0.03	0	0.025	0.025	0.0775	0.0925	0.24	0.2175	0.125	0.0275	0.06	0.43	0.0333333	0.19	0.22	0.0625	0	0	0.02	0	0.025	0	0.0625	0.0275	0	0
Solyc00g201460	0.0525		0	0	0	0	0	0	0	0	0	0	0	0	0	0	0	0	0	0	0	0	0	0	0	0	0	0	0	0	0	0	0	0	0	0	0	0	0	0	0	0	0	0	0	0	0	0	0
Solyc00g201760	0.0325		0	0	0	0	0	0	0	0	0	0	0	0	0	0	0	0	0	0	0	0	0	0	0	0	0	0	0	0	0	0	0	0	0	0	0	0	0	0	0	0	0	0	0	0.0325	0	0	0
Solyc00g202560	0.09		0	0	0	0	0	0	0	0	0	0	0	0	0	0	0	0	0	0	0	0	0	0	0	0	0	0	0	0	0	0	0	0	0	0	0	0	0	0	0	0	0	0	0	0	0	0	0
Solyc00g203660	0.59		0	0.205	0.0475	0.0475	0.0325	0	0	0.0325	0	0	0	0	0	0	0	0.0225	0	0.16	0.0525	0.0275	0	0	0	0	0	0	0	0	0	0	0	0	0	0.0433333	0.0875	0	0	0	0.0275	0	0	0.0325	0	0.0225	0	0	0
Solyc00g206460	1465.78	Expressed	41.7567	56.135	42.9	8.1075	4.0825	115.73	42.525	3.4375	87.3725	20.685	3.8425	29.235	8.8825	0.8175	6.005	6.1075	32.4033	52.6375	26.5725	10.84	4.2175	80.255	33.13	2.7075	69.2375	14.63	3.1175	23.1075	9.2125	1.08	3.76	3.805	531.453	196.487	63.4525	62.21	47.5525	175.715	55.1	15.465	64.8275	21.7275	4.4875	29.595	7.3	1.265	9.765
Solyc00g207960	6.57	Expressed	0	0	0	0.025	0.5625	0.615	0.85	1.0725	0.57	0.7475	1.0825	0.0875	0.0725	0.3225	0.0925	0	0	0	0.0325	0.2425	0.425	0.8325	0.7925	2.4975	1.65	1.5425	2.225	0.16	0.1425	0.26	0.0275	0	0	0	0	2.035	0.58	0	0	0.0975	0	0.11	0	0	0	0	0
Solyc00g209460	8.51667	Expressed	0.233333	0.3425	0.4825	0.5575	0.1725	0.3	0.25	0.1875	0.3	0.2225	0.1525	0.16	0.3225	0.1825	0.28	0.235	0.396667	0.585	0.285	0.3425	0.3525	0.2075	0.215	0.1225	0.14	0.2775	0.1725	0.2125	0.1925	0.3075	0.1075	0.165	1.24	1.25333	0.2325	0.4	0.32	0.1875	0.285	0.1775	0.2025	0.2425	0.31	0.205	0.1575	0.155	0.165
Solyc00g209560	8.49	Expressed	0.193333	0.255	0.3825	0.435	0.1725	0.2275	0.17	0.1875	0.2475	0.2225	0.1525	0.16	0.3	0.1525	0.255	0.2075	0.23	0.5075	0.2025	0.3425	0.3275	0.2075	0.18	0.1225	0.14	0.29	0.1725	0.19	0.1925	0.2775	0.085	0.155	1.06333	1.21333	0.19	0.4	0.32	0.1875	0.285	0.1775	0.15	0.2125	0.285	0.205	0.1575	0.155	0.1825
Solyc00g210860	2.215	Expressed	0	0	0.025	0.05	0	0	0	0	0.0275	0	0	0	0	0	0	0.08	0.03	0.075	0	0	0	0	0.0325	0.0575	0	0.025	0.055	0.045	0.02	0	0	0.035	0	0	0.025	0	0.0325	0	0.0225	0	0	0.03	0.1425	0.065	0.1375	0	0.0475
Solyc00g212260	79.6775	Expressed	0	0	0.1425	0.195	0	0	0.0325	0	0	0	0	0.025	0	0	0.03	0	0	0.0625	2.005	1.215	0.1375	0	0	0	0	0	0	0	0	0	0	0	0	0	8.4175	17.255	1.0925	0	0.045	0.0275	0	0.025	0	0	0.095	0	0
Solyc00g213960	0.0525		0	0	0	0	0	0	0	0	0	0	0	0	0	0	0	0	0	0	0	0	0	0	0	0	0	0	0	0	0	0	0	0	0	0	0	0	0	0	0	0.0275	0	0	0	0	0	0	0.02
Solyc00g215560	1.865	Expressed	0	0.0775	0.0525	0.05	0.1975	0.325	0.1975	0.29	0.2225	0.46	0.2425	0.3275	0.2175	0.2025	0.2025	0.3625	0	0.0425	0.0225	0.16	0.405	0.24	0.18	0.215	0.13	0.335	0.2725	0.2425	0.255	0.1525	0.46	0.4775	0	0	0.0775	0.3675	0.2875	0.3375	0.4825	0.285	0.3775	0.43	0.6075	0.5625	0.97	0.4775	0.76
Solyc00g217560	0.07		0	0	0	0	0	0	0	0	0	0	0	0	0	0	0	0	0	0	0	0	0	0	0	0	0	0	0	0	0	0	0	0	0	0	0	0	0	0	0	0	0	0	0	0	0	0	0
Solyc00g217960	45.77	Expressed	2.88	2.895	5.1425	8.4625	5.8	17.2725	11.96	6.7	21.605	13.9875	9.05	19.095	14.965	10.515	9.055	7.815	1.21	2.73	3.4975	3.0875	4.7825	14.8025	10.9775	6.435	20.8675	15.295	13.5475	15.895	12.8375	9.52	6.6675	7.6775	3.86	0.806667	6.56	8.1375	10.89	16.915	10.015	9.7625	14.645	9.55	6.555	13.435	9.1525	7.25	9.705
Solyc00g218560	0.3525		0	0	0	0	0	0	0.065	0.0325	0	0	0	0	0	0	0	0	0	0	0	0	0.0275	0	0	0	0	0	0	0	0	0	0	0	0	0	0	0.0275	0	0	0.0275	0	0	0	0.0625	0	0	0	0
Solyc00g220360	0.0366667		0	0	0	0	0	0	0	0	0	0	0	0	0	0	0	0	0	0	0	0	0	0	0	0	0	0	0	0	0	0	0	0	0	0	0	0	0	0	0	0	0	0	0	0	0	0	0
Solyc00g222060	0.0675		0	0	0	0	0	0	0	0	0	0	0	0	0	0	0	0	0	0	0	0	0	0	0	0	0	0	0	0	0	0	0	0	0	0	0	0	0	0	0	0	0	0	0	0	0	0	0
Solyc00g222460	0.16		0	0	0	0	0.025	0	0.0225	0.06	0.055	0.0325	0.06	0.045	0.03	0	0	0.0575	0	0	0.0325	0.025	0	0.03	0	0.07	0	0	0	0.02	0.1025	0.0275	0.0225	0.0125	0	0	0	0.05	0	0.1125	0.0225	0	0.0475	0.0325	0.0775	0.045	0.06	0.08	0.16
Solyc00g226760	49.5775	Expressed	0	0.02	0.09	0.0775	0	0	0	0	0	0	0	0	0	0	0	0	0	0	1.285	0.6325	0.13	0.06	0	0	0	0	0	0	0	0	0	0	0	0	6.0375	10.8675	0.4475	0	0	0	0	0	0.03	0	0.035	0	0
Solyc00g227860	27.4025	Expressed	5.82333	26.6375	19.605	15.895	19.63	18.3325	19.24	19.1225	13.2025	13.15	11.26	5.4	3.9875	2.6675	1.77	2.0725	13.99	27.4025	15.5675	11.1075	10.205	13.915	13.1075	12.845	7.965	6.35	5.455	2.26	1.2675	1.6325	1.28	1.8825	9.85	2.65333	25.73	14.465	13.19	11.895	10.8425	12	2.09	1.6675	2.4875	0.845	0.4775	0.5875	0.6325
Solyc00g227960	37.115	Expressed	0	0	0.09	0.05	0	0	0	0	0	0	0	0.0225	0	0.0225	0	0	0	0	1.0375	0.495	0.0775	0.03	0	0	0	0	0	0	0	0	0	0	0	0	5.2375	7.66	0.415	0	0	0	0	0	0	0	0	0	0
Solyc00g228260	0.025		0	0	0	0	0	0	0	0	0	0	0	0	0	0	0	0	0	0	0	0	0	0	0	0	0	0	0	0	0	0	0	0	0	0	0	0	0	0	0	0	0	0	0	0	0	0	0
Solyc00g229260	1.355	Expressed	0	0	0	0	0	0.03	0	0	0	0	0	0	0	0	0	0	0	0	0	0	0.0275	0	0	0	0	0.03	0	0	0	0	0	0	0	0	0.0425	0.085	0.0325	0	0.025	0	0.0275	0	0	0.0325	0	0.0225	0
Solyc00g230060	2.3225	Expressed	0.0633333	0.1175	0.05	0	0	0.045	0	0.065	0.0225	0.025	0.075	0.025	0.0525	0	0.0225	0.14	0.06	0.075	0.0325	0.0275	0	0.0575	0.065	0	0	0.05	0.0325	0.02	0.09	0.075	0.0275	0.1525	0	0	0.1125	0.055	0.095	0.0525	0.125	0	0.0575	0.09	0.2875	0.0875	0.2225	0.04	0.045
Solyc00g230070	7.6675	Expressed	0	1.6975	1.0375	2.14	0.5375	0.0875	0.3775	0.235	0.2075	0.3975	0.38	0.205	0.18	0.22	0.2325	0.3575	0	4.565	1.38	0.655	0.4425	0.15	0.2725	0.2525	0.1175	0.0875	0.185	0.065	0.065	0	0.1425	0.1625	0	0	2.7425	1.1625	0.6825	0.545	0.7275	0.245	0.1775	0.195	0.3425	0.12	0.1325	0.0275	0.095
Solyc00g230080	17.3075	Expressed	0	2.715	1.8425	3.7875	0.77	0.35	0.925	0.6675	0.495	0.81	0.63	0.3625	0.3425	0.4275	0.45	0.5375	0	7.28	2.38	1.3175	0.5925	0.3525	0.335	0.4875	0.2175	0.13	0.2975	0.125	0.085	0	0.1775	0.325	0.06	0	4.725	1.99	1.105	1.0325	1.1825	0.3725	0.31	0.3075	0.4325	0.1725	0.42	0.14	0.2575
Solyc00g230280	0.045		0	0	0	0	0	0	0	0	0	0	0	0	0	0	0	0	0	0	0	0	0	0	0	0	0	0	0	0	0	0	0	0	0	0	0	0	0	0	0	0	0	0	0	0	0	0	0
Solyc00g231680	0.1175		0	0	0	0	0.0275	0.0225	0	0	0	0	0.0525	0	0	0.03	0	0	0	0	0	0	0	0	0	0.03	0	0	0.05	0	0	0	0	0	0	0	0	0	0	0.1025	0	0.02	0.0775	0.055	0.055	0.1175	0.1175	0.0175	0.0225
Solyc00g231780	6.255	Expressed	0.04	0.1675	0.24	0.1025	0.16	0.115	0.1275	0.0875	0.255	0.2475	0.27	0.14	0.31	0.37	0.2325	0.315	0	0.2475	0.445	0.2675	0.3125	0.0625	0.0275	0.1575	0.345	0.3675	0.6625	0.4975	0.535	0.2475	0.4325	0.3025	0.0566667	0.0833333	0.225	0.315	0.23	0.225	0.5975	0.1375	0.3775	0.955	0.485	0.2675	0.4675	0.2625	0.2225
Solyc00g233480	0.76		0	0	0	0.025	0	0.0525	0	0	0	0	0.0275	0.0225	0	0	0	0	0	0.02	0	0.0525	0.045	0.0325	0	0.025	0.0325	0.03	0.02	0	0	0.055	0	0	0	0	0	0	0	0	0	0.02	0	0	0	0	0.035	0.0225	0
Solyc00g237680	0.535		0	0	0	0	0	0	0	0	0	0	0	0	0	0	0	0	0	0.0325	0.025	0	0	0	0	0	0	0	0	0	0	0	0	0	0	0	0.05	0.1625	0	0	0	0	0	0	0	0	0.0275	0	0
Solyc00g240580	0.0333333		0	0	0	0	0	0	0	0	0	0	0	0	0	0	0	0	0.0333333	0	0	0	0	0	0	0	0	0	0	0	0	0	0	0	0	0	0	0	0	0	0	0	0	0	0	0	0	0	0
Solyc00g244280	1.635	Expressed	0.256667	0.04	0	0.05	0	0	0	0	0	0	0	0	0.0575	0	0	0.03	0	0	0	0	0	0	0	0.0325	0	0	0	0	0	0.03	0	0	0.166667	0.19	0	0	0	0	0.05	0	0.03	0	0.1175	0.0225	0.09	0	0.0925
Solyc00g244290	23.8275	Expressed	6.6	2.7	3.355	3.515	3.105	3.865	3.0275	2.54	3.1875	3.1975	2.945	2.785	3.055	3.065	3.5775	3.69	0.193333	4.7325	7.67	4.305	5.47	3.2075	3.2975	4.445	4.08	4.2225	5.315	3.505	3.9	2.725	2.5575	3.715	5.98333	6.22333	6.655	4.1875	5.605	3.3575	4.5075	4.3725	3.0925	4.2725	3.6475	4.0025	4.49	3.38	2.8525
Solyc00g244300	18.64	Expressed	1.72667	1.0325	2.055	1.605	2.0875	2.745	2.15	1.5825	1.7775	1.3475	1.7625	1.415	1.5225	1.1375	1.385	1.44	0.1	2.0725	4.96	3.0525	3.8975	2.115	2.025	2.94	2.45	2.5725	3.675	1.5775	1.505	1.015	1.27	1.09	4.98	3.07	4.08	2.95	3.945	2.2525	3.255	3.1575	1.1525	1.73	1.1325	0.6875	0.91	0.6975	0.7375
Solyc00g245200	0.215		0	0.02	0.03	0.095	0	0	0	0	0	0	0	0	0	0	0	0	0	0.0625	0	0	0	0	0	0	0	0	0	0	0	0	0	0	0	0	0	0.0575	0	0	0	0	0	0.03	0	0.02	0	0	0
Solyc00g246800	0.0875		0	0	0	0	0	0	0	0	0	0	0	0	0	0	0	0	0	0	0	0	0	0	0	0	0	0	0	0	0	0	0	0	0	0	0	0	0	0	0	0	0	0	0.0875	0	0.0275	0	0
Solyc00g247300	24.865	Expressed	0	0.0425	0.2025	4.0675	10.5625	16.73	19.765	18.2175	8.385	11.7875	8.3175	0.1625	0.11	0.0825	0.0225	0.0875	0	0.0425	0.62	3.9825	9.315	24.865	23.11	21.08	5.1925	4.03	5.3475	0.0225	0.065	0.03	0	0.0125	0.27	0	1.5925	6.95	8.9025	4.6975	5.2075	6.7175	0	0.08	0.1025	0	0	0.105	0.0225
Solyc00g249200	0		0	0	0	0	0	0	0	0	0	0	0	0	0	0	0	0	0	0	0	0	0	0	0	0	0	0	0	0	0	0	0	0	0	0	0	0	0	0	0	0	0	0	0	0	0	0	0
Solyc00g249900	24.0833	Expressed	10.2033	3.45	4.4825	5.7475	5.1575	5.4825	5.19	5.005	3.9325	4.25	7.635	2.5075	3.41	2.87	3.38	2.6575	9.30667	4.4225	4.7625	7.045	6.0225	4.7125	8.9975	4.2925	2.6525	2.8875	2.735	1.4475	1.25	2.005	1.135	1.07	10.91	5.52333	3.765	7.2725	4.07	5.8175	5.215	3.995	1.7425	4.9825	3.3525	2.6525	5.0525	2.4775	2.76
Solyc00g249910	4.255	Expressed	0	1.435	2.4725	1.115	3.1025	2.64	2.4825	2.06	1.115	1.2325	1.63	0.5175	1.1	0.84	0.72	0.9175	0	2.1925	2.3125	4.255	3.2325	2.635	3.0725	2.6475	1.165	1.1375	1.155	0.4125	0.455	0.72	0.36	0.425	0	0	1.4425	3.785	1.995	1.705	1.945	1.575	0.3375	0.6075	0.5375	0.2775	0.34	0.32	0.3325
Solyc00g254110	0		0	0	0	0	0	0	0	0	0	0	0	0	0	0	0	0	0	0	0	0	0	0	0	0	0	0	0	0	0	0	0	0	0	0	0	0	0	0	0	0	0	0	0	0	0	0	0
Solyc00g254910	28.39	Expressed	0	0.02	0.1775	0.1925	0.085	0.3075	0.2575	0.1925	0.325	0.2325	0.2675	0.3425	0.1525	0.45	0.1625	0.115	0.223333	0.67	0.6275	0.2375	0.185	0.1175	0.18	0.2375	0.2525	0.33	0.16	0.265	0.0825	0.13	0.0275	0.0475	0.116667	0	4.2825	2.02	0.9375	0.67	1.05	0.6875	0.025	0.2425	0.0825	0.0225	0	0.065	0
Solyc00g255510	1	Expressed	0	0.0225	0.0225	0	0	0	0.0225	0	0.0275	0	0	0.0225	0.0225	0	0	0	0	0.05	0	0	0	0	0	0	0	0	0	0	0	0	0	0	0	0.33	0.05	0	0	0	0	0	0	0	0	0.02	0	0	0
Solyc00g256710	10.635	Expressed	0	1.7275	4.0275	2.7225	7.9625	9.61	10.635	9.525	5.3575	6.5925	6.945	4.2	3.8825	3.9475	3.1075	2.49	0	1.6675	3.58	5.2925	7.6175	7.57	8.2975	9.6075	5.2025	5.38	6.42	3.695	4.345	3.7825	3.86	3.21	0	0	3.8125	4.7825	5.845	5.7	6.1	6.81	2.545	2.4725	2.5725	2.025	1.84	1.64	1.7675
Solyc00g257110	0.695		0.04	0.27	0.1725	0.05	0.0275	0.0525	0.0225	0.1125	0.045	0.0325	0.0225	0.025	0.045	0.0225	0.055	0.0225	0	0.275	0.0675	0.1075	0	0.0925	0.0325	0.065	0	0	0.05	0	0	0.055	0.0525	0.0475	0	0.183333	0.31	0.1625	0.03	0.0975	0.0275	0.0225	0.0475	0.09	0.0825	0.055	0	0.0275	0.0375
Solyc00g263210	0.176667		0.166667	0	0	0	0	0	0	0	0	0	0	0	0	0	0	0	0.0333333	0	0	0	0	0	0	0	0	0	0	0	0	0	0	0	0	0	0	0	0	0	0	0	0	0	0	0	0	0	0
Solyc00g265110	31.7533	Expressed	2.56667	6.6325	6.85	5.25	2	1.6875	1.805	1.6525	2.125	1.6775	2.06	1.3225	1.25	1.185	0.9525	0.84	3.28	8.2425	6.1075	2.0925	1.77	1.1	1.025	1.4575	2.1125	1.74	2.3225	0.4825	0.515	0.8575	0.355	0.33	5.10333	11.8767	5.37	1.6775	2.28	2.375	2.4375	2.395	0.7725	1.44	1.4825	0.3225	0.26	0.435	0.22
Solyc00g265510	2.215	Expressed	0.0633333	0	0	0.0225	0	0	0	0	0	0	0	0	0.0225	0	0	0	0.03	0	0	0	0.1075	0.0875	0.095	0	0	0	0	0	0	0	0	0	0.03	0	0	0.28	0.905	0.1075	0.3	0.0525	0	0	0	0	0	0	0
Solyc00g266110	0.3725		0	0	0	0	0	0	0	0	0.0275	0.0325	0	0	0	0.045	0	0	0	0	0.0225	0	0	0	0	0.03	0	0	0	0	0	0	0	0	0	0	0.025	0.105	0	0	0	0	0	0.025	0	0	0	0	0
Solyc00g268310	0		0	0	0	0	0	0	0	0	0	0	0	0	0	0	0	0	0	0	0	0	0	0	0	0	0	0	0	0	0	0	0	0	0	0	0	0	0	0	0	0	0	0	0	0	0	0	0
Solyc00g269810	0.0333333		0	0	0	0	0	0	0	0	0	0	0	0	0	0	0	0	0	0	0	0	0	0	0	0	0	0	0	0	0	0	0	0	0	0	0	0	0	0	0	0	0	0	0	0	0	0	0
Solyc00g270510	0.075		0	0	0	0	0	0	0	0	0	0	0	0	0	0	0.025	0	0	0	0	0	0	0	0	0	0	0	0	0	0	0	0	0	0	0	0	0	0	0	0	0	0	0	0	0	0	0	0.02
Solyc00g272810	6.57	Expressed	3.9	1.7675	3.415	1.9625	0.4225	0.2425	0.165	0.29	0.5475	0.3825	0.3325	0.2475	0.1975	0.31	0.3775	0.245	0.56	0.7225	0.6475	2.375	0.155	0.0925	0.1775	0.08	0.1025	0.025	0.0325	0.3575	0.385	0.195	0.26	0.1025	0.106667	0.0433333	0.165	0.3225	0.225	0.22	0	0.02	0.37	0.025	0.1275	0.5575	0.4	0.3125	0.72
Solyc00g273110	52.3075	Expressed	0.41	2.235	3.5425	11.565	33.9975	15.56	19.07	24.1375	14.5675	18.105	17.0975	7.2975	7.14	6.9875	5.3125	5.7575	0.133333	3.035	3.7225	37.735	35.93	18.55	17.9575	28.8375	11.27	11.37	15.4625	6.475	6.725	6.9475	6.24	8.3825	0.646667	0.386667	6	16.4925	15.48	14.84	17.955	19.0375	4.48	5.6025	7.3925	3.45	6.1575	3.68	5.55
Solyc00g275310	0.11		0	0.0325	0	0	0	0.03	0	0	0	0	0	0	0	0	0	0	0	0.0225	0	0	0	0	0	0	0	0	0	0	0	0	0	0	0	0	0	0	0	0	0	0	0	0	0	0	0	0	0
Solyc00g277510	19.7775	Expressed	0	2.34	2.565	7.3775	2.1875	0.735	1.2775	0.7675	1.8875	1.9775	1.57	2.0275	1.2725	1.0725	1.095	1.515	0	5.455	2.335	1.96	0.725	0.39	1.38	0.5975	0.5925	0.2175	0.2125	0.2625	0.2	0.27	0.175	0.555	0	0	4.655	2.0875	1.14	0.8525	1.2825	1.14	0.8525	3.79	0.4875	1.1075	0.4175	0.4225	0.365
Solyc00g278110	0.2175		0	0.0625	0	0.025	0	0	0	0.0275	0	0	0.03	0	0	0	0.0225	0.03	0	0	0.0275	0	0	0	0	0	0.0325	0.055	0	0.045	0	0.0575	0.03	0.0625	0	0	0	0	0	0	0	0	0.0225	0.125	0.025	0.0525	0	0	0.0175
Solyc00g280110	0.555		0	0	0	0	0	0	0	0	0	0	0	0	0	0	0	0	0	0.02	0.075	0.1025	0.025	0	0.0575	0.0325	0	0.015	0	0	0	0	0	0	0	0	0.1475	0.295	0.1925	0.24	0.025	0.195	0	0	0	0	0	0	0
Solyc00g281110	1.645	Expressed	0.03	0.0425	0.025	0.1025	0.0325	0.085	0.0225	0.1225	0.055	0.2	0.08	0.0675	0.0525	0.035	0.18	0.1525	0	0.055	0.0475	0.155	0.055	0.03	0.065	0.175	0.1525	0.11	0.06	0.1475	0.08	0.07	0.09	0.085	0	0.0366667	0.1275	0.25	0.16	0.4875	0.3	0.3475	0.1825	0.35	0.1825	0.065	0.2275	0.0175	0.305
Solyc00g282510	26.92	Expressed	0	0.3475	0.7925	1.3675	6.6225	10.6475	8.2675	9.6375	12.9825	12.11	12.1325	8.095	7.5975	6.9725	5.365	3.115	0	0.2425	0.4925	0.74	2.8075	7.6375	4.695	3.8125	6.56	5.1875	3.69	3.7575	2.6525	2.4525	2.345	1.1725	0.116667	0	0.9675	0.795	1.1325	0.96	1.53	1.045	3.6525	2.8475	2.9	1.15	1.22	0.7425	0.665
Solyc00g283010	0.075		0	0	0	0	0	0	0	0	0	0	0	0	0	0	0	0	0	0	0	0	0	0	0	0	0	0	0	0	0	0	0	0	0	0	0	0	0	0	0	0	0.0225	0	0	0	0.035	0.0225	0
Solyc00g283110	2.76	Expressed	2.15333	0.0725	0.0225	0.05	0.0275	0	0.035	0	0.0275	0	0.0225	0.0875	0.05	0.0875	0.0225	0	0.816667	0.0225	0.0475	0.055	0.025	0	0.0325	0.025	0	0.05	0	0.02	0	0.05	0	0.025	1.87667	0.663333	0.0625	0.0575	0	0.0525	0.03	0	0.025	0.0825	0	0	0	0.0525	0
Solyc00g284510	0.0775		0	0	0	0	0	0	0	0	0	0	0	0	0	0	0	0	0	0	0	0	0	0	0	0	0	0	0	0	0	0	0	0	0	0	0	0	0.0325	0	0	0	0	0	0	0	0	0	0
Solyc00g286010	0		0	0	0	0	0	0	0	0	0	0	0	0	0	0	0	0	0	0	0	0	0	0	0	0	0	0	0	0	0	0	0	0	0	0	0	0	0	0	0	0	0	0	0	0	0	0	0
Solyc00g286020	0		0	0	0	0	0	0	0	0	0	0	0	0	0	0	0	0	0	0	0	0	0	0	0	0	0	0	0	0	0	0	0	0	0	0	0	0	0	0	0	0	0	0	0	0	0	0	0
Solyc00g286030	0		0	0	0	0	0	0	0	0	0	0	0	0	0	0	0	0	0	0	0	0	0	0	0	0	0	0	0	0	0	0	0	0	0	0	0	0	0	0	0	0	0	0	0	0	0	0	0
Solyc00g287330	0.1325		0	0	0	0	0	0	0	0	0	0	0	0	0.0225	0	0	0	0	0	0	0	0	0	0	0.03	0	0	0	0.045	0	0.0275	0	0	0	0	0	0	0	0	0	0	0	0	0.0575	0	0	0	0.02
Solyc00g289230	3.535	Expressed	0	0.0225	0.0825	0.13	0.245	0.265	0.44	0.18	0.95	0.7875	0.395	0.8075	0.5575	0.18	0.1625	0.2125	0	0.575	0.2275	0.2075	0.145	0.03	0	0.0325	0.1125	0.0975	0.0675	0.15	0.075	0.11	0.13	0.07	0.693333	0	1.835	2.1475	2.495	0.945	1.28	1.385	0.1725	0.215	0.17	0.18	0.0675	0.0625	0.0775
Solyc00g294230	0.24		0	0.0225	0	0	0.0575	0.1275	0.0325	0.055	0.0225	0.095	0.0275	0.1325	0.03	0	0.03	0.03	0	0	0.025	0.185	0.06	0.0575	0.0625	0.03	0.05	0	0.0425	0.0425	0.085	0.025	0	0	0	0	0	0	0	0.095	0.105	0.0425	0.125	0.0325	0	0.02	0	0	0.0375
Solyc00g294630	0.035		0	0	0	0	0	0	0	0	0	0	0	0	0	0	0	0	0	0	0	0	0	0	0	0	0	0	0	0	0	0	0	0	0	0	0	0	0	0	0	0	0	0	0	0	0	0	0
Solyc00g297330	0.0175		0	0	0	0	0	0	0	0	0	0	0	0	0	0	0	0	0	0	0	0	0	0	0	0	0	0	0	0	0	0	0	0	0	0	0	0	0	0	0	0	0	0	0	0	0	0	0
Solyc00g300430	0.04		0	0	0	0	0	0	0	0	0	0	0	0	0	0	0	0	0	0	0	0	0	0	0	0	0	0	0	0	0	0	0	0	0	0	0	0	0	0	0	0	0	0	0	0	0	0	0
Solyc00g300730	0.09		0	0.0225	0	0	0	0.0325	0	0	0	0	0	0	0	0	0	0	0.09	0	0	0	0	0	0	0	0	0	0	0	0	0	0	0	0	0	0.025	0	0	0	0	0	0	0	0.025	0	0	0	0
Solyc00g303630	0.415		0	0	0	0.0225	0	0	0	0	0	0	0	0	0	0	0	0	0	0.0225	0.055	0.08	0	0	0	0	0.0325	0	0	0	0	0	0	0	0	0	0	0.0275	0.03	0	0	0	0.0275	0	0	0	0	0	0
Solyc00g304030	0.0333333		0	0	0	0	0	0	0	0	0	0	0	0	0	0	0	0	0	0	0	0	0	0	0	0	0	0	0	0	0	0	0	0	0	0	0	0	0	0	0	0	0	0	0	0	0	0	0
Solyc00g304630	0.0325		0	0	0	0	0	0	0	0	0	0	0	0	0	0	0	0	0	0	0	0	0	0	0	0	0	0	0	0	0	0	0	0	0	0	0	0	0	0	0	0	0	0	0	0	0	0	0
Solyc00g306730	0.0275		0	0	0	0	0	0	0	0	0	0	0	0	0	0	0	0	0	0	0	0	0	0	0	0	0	0	0	0	0	0	0	0	0	0	0	0	0	0	0	0	0	0	0	0	0	0	0
Solyc00g306830	0		0	0	0	0	0	0	0	0	0	0	0	0	0	0	0	0	0	0	0	0	0	0	0	0	0	0	0	0	0	0	0	0	0	0	0	0	0	0	0	0	0	0	0	0	0	0	0
Solyc00g308530	0.723333		0	0	0	0	0	0	0	0	0	0	0	0	0	0	0	0	0	0	0	0	0	0	0.03	0	0	0	0	0	0	0	0	0	0	0	0	0.055	0	0	0	0	0	0	0	0	0	0	0
Solyc00g308930	0.1175		0	0	0	0	0	0	0	0	0	0	0	0	0	0	0	0	0	0	0	0	0	0	0	0	0	0	0	0	0	0	0	0	0	0	0	0.03	0	0	0	0	0	0	0	0	0	0	0
Solyc00g309530	1.56333	Expressed	0	0.0625	0	0.0525	0	0	0	0.0325	0	0	0.0275	0.0225	0	0.06	0.025	0.1175	0	0.09	0	0	0.025	0.03	0.0275	0	0	0.015	0.095	0.045	0.035	0	0.03	0.0675	0.0933333	0.0433333	0.025	0	0	0	0.025	0.0275	0.135	0.17	0.195	0.0225	0.0625	0.025	0.1125
Solyc00g311230	4.45333	Expressed	3.63	0.7475	0.5275	0.72	0.4325	0.26	0.275	0.27	0.05	0.225	0.205	0.0225	0.0225	0.0625	0	0	1.88	0.6275	0.22	0.3425	0.18	0.1475	0.21	0.3675	0.06	0.085	0.255	0.065	0.09	0	0	0	2.68333	1.54333	0.6375	0.2625	0.4225	0.515	0.36	0.1975	0	0.11	0.055	0.0975	0.1	0.06	0
Solyc00g313030	0.815		0.04	0.045	0.03	0	0	0.0325	0	0	0	0	0.0225	0	0	0.035	0.025	0	0	0.0325	0	0	0	0	0	0	0	0	0	0	0.02	0.02	0	0	0	0	0	0	0	0	0	0	0.0275	0.165	0.055	0	0.035	0	0.0225
Solyc00g313530	0.0225		0	0	0	0	0	0	0	0	0	0	0	0	0	0	0	0	0	0	0	0	0	0	0	0	0	0	0	0	0	0	0	0	0	0	0	0	0	0	0	0	0	0	0	0	0	0	0
Solyc00g313930	1.44667	Expressed	0.103333	0.0675	0	0	0	0.0225	0	0	0	0	0	0	0.0225	0	0	0.0425	0.203333	0	0	0	0	0	0	0	0	0	0	0	0	0	0	0	0.0566667	0.933333	0	0.0225	0	0	0	0	0	0	0	0	0	0	0
Solyc00g316030	0.89		0.89	0	0	0	0	0	0	0	0	0	0	0	0	0	0	0	0	0.0275	0	0.025	0	0	0	0	0	0	0	0	0	0	0	0.0125	0	0	0	0	0	0	0	0	0	0	0	0	0	0	0
Solyc00g316530	1.685	Expressed	0.393333	0.02	0.025	0.0275	0.0275	0.055	0.0225	0.0325	0.0225	0.065	0	0	0.05	0.0225	0.0625	0.08	0.12	0.095	0	0.025	0.0225	0.03	0.0325	0	0.035	0	0.02	0.02	0.0825	0	0.0275	0.0225	0.0766667	0.263333	0.025	0.045	0	0.02	0.1475	0.0925	0.085	0.12	0.025	0.0225	0.205	0.0275	0.245
Solyc00g316730	1.16333	Expressed	1.16333	0	0	0	0	0	0	0	0	0	0.0275	0	0	0	0	0	0	0.06	0	0.025	0	0	0	0	0	0	0	0	0	0	0	0.0125	0	0	0	0	0	0	0	0	0	0	0	0	0	0	0
Solyc00g318030	2.175	Expressed	0	0	0	0	0	0	0	0	0	0	0	0	0	0	0	0	0	0	0	0	0.0225	0.03	0	0	0	0	0	0	0	0	0	0	0	0	0.0375	0.2225	0.0975	0	0.0225	0	0	0.0275	0	0	0	0	0
Solyc00g318130	44.3575	Expressed	0	0	0.025	0	0.0325	0.03	0	0	0	0	0	0	0	0	0	0	0	0.5	0.5475	0.75	0.2575	0.1175	0	0	0	0	0	0	0	0	0	0.0225	0	0	3.285	8.09	0.81	0.095	0.1925	0.0875	0.0525	0.12	0.0275	0	0	0.0425	0
Solyc00g318830	6.835	Expressed	0	0.2	0.435	0.1425	0.0775	0.195	0.12	0.115	0.055	0.0975	0.1125	0.065	0.155	0.0525	0.205	0.6825	0	0.5175	0.3275	0.485	0.1425	0.09	0.1175	0.1975	0.1025	0.195	0.2475	0.34	0.2875	0.1425	0.5375	0.665	0	0	1.255	1.515	0.16	0.1725	0.1475	0.0625	1.5075	0.92	1.1475	2.205	1.65	1.4225	2.51
Solyc00g320430	1.44	Expressed	0.103333	0.04	0.055	0.0475	0.065	0	0.0225	0.0275	0	0	0.03	0.0475	0.0275	0	0.08	0.03	0.0666667	0.0275	0.0325	0	0	0	0	0.035	0	0.04	0	0.0225	0	0.0575	0	0.025	0.166667	0.433333	0	0	0	0	0.05	0.0325	0.05	0	0	0.02	0.1025	0	0
Solyc00g322630	0.65		0	0	0	0	0	0	0	0	0.0275	0	0	0	0	0	0	0	0	0	0	0.025	0	0	0	0	0	0	0	0	0	0	0	0	0	0	0.0425	0.0575	0	0	0	0	0	0.025	0	0	0	0	0
Solyc00g322830	0.1975		0	0.0225	0.025	0	0	0.045	0	0.0575	0	0.065	0.0575	0.0225	0.0225	0.0225	0.0525	0.0275	0	0.0525	0	0.1025	0.0525	0.06	0	0.065	0.035	0.015	0	0.0425	0.02	0.025	0.055	0.0625	0	0	0.025	0	0	0.0225	0	0.0225	0.03	0.0325	0.025	0	0	0.0175	0
Solyc00g323130	1.8175	Expressed	0	0	0	0.025	0.0525	0	0	0	0	0	0	0	0	0	0	0	0	0	0.0275	0.2075	0.075	0.03	0	0	0	0	0	0	0	0	0.0225	0	0	0	0.325	0.915	1.8175	0.69	0.7075	1.2575	0.0275	0	0	0	0	0	0
Solyc00g324530	0.0475		0	0	0	0	0	0	0	0	0	0	0	0	0	0	0	0.0275	0	0.0225	0	0	0	0	0	0	0	0.025	0	0.02	0	0	0.03	0	0	0	0	0	0	0.0225	0	0	0	0	0.025	0	0	0	0
Solyc01g005000	2746.62	Expressed	39.7	12.82	42.2525	155.898	127.46	69.865	87.095	105.478	19.775	27.71	33.845	3.9	3.69	4.4375	3.8425	5.82	31.2267	88.26	118.12	237.882	207.062	92.2875	142.975	109.455	16.12	18.2175	19.38	4.4675	3.9125	6.23	2.745	3.2125	106.087	79	532.967	368.267	236.532	60.415	59.5125	79.8975	0.97	1.335	1.54	1.6	0.7425	0.825	0.6625
Solyc01g005010	43.9975	Expressed	7.81	16.1975	11.07	17.055	12.495	6.0725	6.745	8.72	3.7775	4.5175	4.68	1.6775	1.26	1	0.78	0.61	13.8967	19.685	12.9725	8.0425	5.3675	4.44	4.7025	5.085	2.985	1.9675	2.2975	0.61	0.4	0.465	0.3425	0.1875	2.35333	1.17	16.45	6.3725	3.5925	1.49	2.32	3.0175	0.34	0.2	0.2675	0.19	0.1025	0.19	0.1325
Solyc01g005020	116.045	Expressed	11.0633	45.825	68.21	72.26	97.45	90.26	93.875	101.722	97.825	105.752	105.06	59.7975	53.58	45.0625	30.065	31.375	10.2267	56.705	65.0825	107.83	92.295	80.8475	76.7875	85.53	61.2525	53.675	52.43	30.6375	24.48	27.335	20.6075	31.285	9.60333	1.93	67.63	105.597	114.823	94.345	116.045	99.8225	13.4975	13.905	20.8875	11.1925	12.535	8.6025	10.2825
Solyc01g005030	210.67	Expressed	24.05	17.93	20.48	29.965	49.11	53.0575	63.34	60.4375	121.715	124.573	120.558	97.3975	99.0925	95.84	59.835	57.1975	16.9367	22.3	22	36.6425	48.6475	66.7275	72.7075	70.0875	164.553	150.518	154.61	78.395	74.2975	78.795	53.15	79.8725	47.6	20.52	33.21	60.96	100.767	196.518	210.67	176.847	66.8675	79.035	90.855	41.73	44.475	30.3375	26.24
Solyc01g005040	0.7675		0	0.02	0	0.025	0	0.0225	0	0	0.7675	0.1825	0.2275	0.1175	0.0675	0	0	0	0	0.04	0	0	0	0	0	0	0	0.03	0	0.02	0	0	0	0	0	0	0	0	0	0	0	0	0	0	0	0	0	0	0
Solyc01g005050	1.20667	Expressed	0.66	0.0325	0	0.0225	0	0	0	0	0	0	0	0	0	0	0	0	1.20667	0	0	0	0	0.03	0.0325	0	0	0	0	0	0	0	0	0.0125	0.03	0	0	0	0	0	0	0	0	0	0	0	0	0	0
Solyc01g005060	85.1725	Expressed	12.02	46.87	21.585	18.1575	9.5525	18.395	14.1275	10.2225	18.2625	11.13	7.2025	9.4475	6.29	3.935	4.67	4.66	31.5867	41.7775	22.2975	6.8325	6.685	15.345	9.7	6.855	10.9325	4.905	4.405	6.895	3.305	3.6625	2.6725	3.4275	0.366667	0.103333	3.7125	2.6075	0.5175	1.11	0.495	0.3675	0.49	0.665	0.2125	0.5675	0.2325	0.4775	0.0825
Solyc01g005070	3.46	Expressed	3.46	0.3675	0.535	0.32	0	0	0	0	0	0	0	0	0	0	0	0	2.35	0.4375	0.725	0.1375	0	0	0	0	0	0.015	0	0	0	0	0	0	1.86	0.233333	0.1125	0.0225	0.03	0	0	0	0	0	0	0	0	0	0
Solyc01g005080	83.535	Expressed	28.6767	83.535	53.3675	26.5325	44.1125	42.91	46.2225	54.595	57.0775	51.445	50.75	31.325	30.4325	26.2575	13.5375	8.3625	27.5267	78.9075	22.6075	8.245	8.7875	13.805	9.8575	15.24	10.4825	7.7275	11.8575	4.4325	2.8175	5.6175	2.7275	3.8425	19.0733	1.92667	3.285	1.495	0.6825	1.035	1.3625	1.325	0.6125	0.7275	0.44	0.27	0.1375	0.135	0.115
Solyc01g005090	3.2275	Expressed	0	0	0	0	0	0	0	0	0	0	0	0	0	0	0	0	0	0	0	0	0	0	0	0	0	0	0	0	0	0	0	0	0	0	0	0	0	0	0	0	0.0775	0.03	0	0	0	0	0.0175
Solyc01g005100	29.4025	Expressed	3.54333	19.2125	16.28	28.8875	29.4025	20.18	24.4575	26.735	19.865	21.2	21.635	12.45	11.565	11.84	12	14.2525	6.62667	19.8225	15.1075	19.6725	21.99	23.6825	15.7075	24.7025	19.2525	17.3475	18.76	13.5375	14.995	13.86	14.36	19.2725	2.1	0.99	23.66	22.4475	19.455	21.8525	23.2075	24.69	8.3575	8.96	10.425	8.245	7.64	6.215	7.7775
Solyc01g005110	33.3225	Expressed	10.9167	15.1675	8.64	9.9175	8.0375	6.65	6.56	6.6125	10.495	9.6075	8.65	11.15	11.3975	12.4175	12.0825	13	9.19333	14.87	9.195	6.665	5.4025	7.1575	7.8775	6.365	8.62	9.2075	8.82	9.5075	10.6325	11.835	8.6025	10.105	2.26	8.09	10.28	10.845	6.7025	7.97	5.725	6.1275	11.8175	9.9275	9.8125	9.5575	10.5975	10.71	9.195
Solyc01g005120	137.062	Expressed	111.27	23.1975	21.875	18.6225	26.185	26.9175	32.4875	35.475	16.97	16.5875	17.87	12.5325	11.3275	8.9625	10.6675	8.01	78.15	29.18	26.66	9.17	12.4675	22.67	22.5825	50.8675	15.1525	12.7325	21.9725	8.145	9.11	10.1975	7.165	5.3625	86.79	2.34333	35.6425	8.7675	3.4475	5.05	5.2325	6.0475	5.5725	4.66	4.09	4.3375	3.345	3.235	2.705
Solyc01g005130	115.223	Expressed	11	1.655	8.65	15.515	13.2725	19.29	14.635	12.0825	18.71	13.075	11.61	14.3075	15.08	11.5725	14.19	18.265	2.78667	2.6975	12.2025	11.5425	11.755	17.8175	14.5975	13.055	17.7225	11.175	10.235	15.635	14.705	14.8675	12.5375	20.135	32.8033	0.836667	8.255	13.135	13.0625	17.0575	12.0825	10.86	16.635	12.0025	9.425	23.5725	19.745	12.87	19.2325
Solyc01g005140	59.7267	Expressed	0	0	0	0.0775	0.6475	1.7525	1.7625	1.8675	2.885	4.1075	3.435	9.735	8.08	8.835	9.3425	22.26	0	0	0	0	0.23	0.5975	0.68	1	1.915	3.17	2.85	5.32	6.8925	7.1925	7.6875	16.5275	0	0	0.025	0.8325	3.595	6.6025	6.2425	4.51	20.7725	17.48	12.86	21.4675	19.55	14.7925	19.7725
Solyc01g005150	3.82	Expressed	0.123333	0.385	0.46	0.5975	0.3425	0.1525	0.24	0.225	0.0225	0.145	0.27	0.0475	0.06	0.1225	0.03	0.0225	0.276667	0.3	0.605	0.42	0.1825	0.1525	0.46	0.6275	0.05	0.255	0.3025	0.065	0.055	0.185	0.075	0.0375	0	0	0.135	0.1025	0.0325	0.0425	0.025	0.0625	0	0.0325	0	0	0	0.0225	0
Solyc01g005160	10.2775	Expressed	0	0.18	0.0825	0.025	0.0325	3.5	0.36	0.03	10.2775	1.0875	0.22	3.7975	0.4175	0.03	0.3025	0.07	0	0.055	0.0325	0.025	0	1.0425	0.03	0	1.175	0.105	0.1875	0.9925	0.08	0.0275	0.0225	0.0125	0	0	0.1225	0.0225	0	0.495	0.1025	0	3.505	0.15	0.0625	0.6725	0.2225	0	0.0375
Solyc01g005170	3.9475	Expressed	0	0.09	0.0775	0.2475	1.3375	1.295	1.33	2.39	2.0575	2.305	2.9825	1.495	1.6825	1.865	1.6125	3.17	0	0.12	0.025	1.395	0.9275	1.6325	1.29	1.5425	1.4425	1.6725	1.675	2.1725	1.4325	2.4825	2.61	3.9475	0.2	0	0	0.5125	0.9775	1.33	2.08	1.4575	0.94	1.11	1.415	1.0375	1.745	1.065	1.47
Solyc01g005180	39.28	Expressed	0	0	0.025	0.2025	0	0	0	0	0	0	0	0	0	0	0	0	0	0	0.235	0.695	0.245	0	0	0	0	0	0	0	0	0	0	0	0	0	1.175	11.8975	0.8425	0	0.0625	0	0	0	0	0	0	0	0
Solyc01g005190	1.40667	Expressed	0.316667	0.3025	0.1275	0.1625	0.47	0.1525	0.115	0.6075	0.2225	0.59	0.435	0.2725	0.2925	0.175	0.395	0.24	0.1	0.1225	0.115	0.19	0.3375	0.24	0.42	0.4575	0.3	0.2775	0.2525	0.3925	0.175	0.415	0.1475	0.4125	0.03	0	0.1275	0.1025	0.1325	0.3225	0.435	0.1325	0.195	0.1875	0.15	0.085	0.305	0.205	0.19
Solyc01g005200	0.77		0.04	0.0325	0.0425	0.0525	0.1425	0.1	0.0225	0.195	0.0725	0.215	0.1725	0.065	0.075	0.145	0.025	0	0	0.085	0.055	0.2075	0.135	0.21	0.1175	0.1525	0.035	0.13	0.0325	0.045	0.1275	0.0525	0.0775	0.07	0	0	0.0425	0.0525	0.0625	0.065	0.1775	0.1375	0.0275	0.145	0.0525	0.1275	0	0.1225	0.0225
Solyc01g005210	351.147	Expressed	31.1133	16.615	23.655	44.4075	46.8825	47.27	45.7525	48.255	58.6525	69.55	84.15	90.815	112.172	125.657	97.77	111.532	27.6233	23.2925	38.39	72.605	61.5075	54.7425	56.1125	47.3725	76.95	82.33	80.6825	92.66	95.7175	110.882	91.385	117.55	31.5933	6.87667	29.6825	60.8425	62.8875	62.7325	73.0375	62.66	42.1175	45.465	53.7825	99.4875	98.625	96.6325	86.6125
Solyc01g005220	53.9525	Expressed	3.4	0.605	1.2875	10.905	21.59	53.9525	30.2975	28.705	47.4475	25.6925	23.1475	29.88	23.63	22.2825	24.96	14.38	3.76	1.385	1.2975	9.6175	17.765	52.605	28.91	30.395	34.71	22.66	25.16	36.3375	31.385	36.9375	28.33	16.5	2.01333	0.206667	6.98	17.56	26.875	32.61	21.3025	21.5425	9.4975	5.2175	4.9875	5.8675	4.035	4.8125	5.75
Solyc01g005230	0.88		0	0	0.0225	0.4475	0.5725	0.7925	0.75	0.88	0.515	0.3325	0.0775	0.0425	0.05	0	0.075	0	0	0	0.0325	0.2825	0.1725	0.57	0.305	0.2375	0	0.025	0	0.0875	0.0375	0.07	0.0275	0.025	0	0	0.0925	0.1	0.23	0.1275	0.15	0.1225	0.0475	0.025	0	0.0225	0	0.0225	0
Solyc01g005240	85.4675	Expressed	31.65	36.0075	42.6225	54.7925	70.5325	64.48	71.9825	85.4675	61.8075	70.115	78.5825	40.6425	43.725	46.61	38	39.9175	30.4467	32.5175	36.3725	72.8375	46.015	45.6625	49.5625	51.27	34.765	39.1925	35.225	29.29	24.485	35.8275	20.3675	24.1	18.5	29.85	33.0825	48.9525	34.64	37.425	37.3725	32.825	27.1575	30.1625	36.5375	32.2675	37.365	29.845	28.59
Solyc01g005250	126.918	Expressed	70.2233	75.5825	90.9275	74.515	60.585	53.0075	50.305	53.3675	46.1025	50.005	55.95	38.39	40.555	40.4225	38.1925	45.145	65.5967	76.995	104.537	126.918	79.2075	47.0125	53.395	43.22	33.125	34.6725	32.9575	35.7125	36.1625	31.755	36.185	44.9225	38.0867	72.1067	59.675	66.3475	43.6175	25.3175	25.4125	28.79	21.23	22.475	25.9575	28.335	32.4325	27.7775	29.57
Solyc01g005260	71.05	Expressed	5.47333	5.085	5.2625	8.135	5.8075	5.505	5.5975	6.105	6.48	5.52	6.4775	4.765	4.0225	4.115	2.9	2.75	71.05	4.8575	4.1375	4.265	2.965	3.31	3.09	3.3325	4.19	3.35	3.42	3.2475	1.63	2.3975	1.6825	1.7475	7.07667	7.86333	4.03	4.46	2.305	2.6425	1.9275	2.625	1.0225	1.175	1.1675	0.59	0.6175	0.87	0.7325
Solyc01g005270	11.9667	Expressed	2.63667	6.4225	3.0675	2.08	2.19	2.28	2.4625	3.8325	3.5425	4.105	4.875	7.6675	4.53	7.295	3.8025	0.945	1.09333	3.7175	0.9125	0.6725	0.3475	0.385	0.27	0.48	0.44	0.8275	0.3775	0.6825	0.71	0.7975	0.41	0.54	4.24333	1.94333	2.275	3.3275	1.585	2.86	3.1925	2.1325	0.5025	1.2225	0.9925	0.6875	0.755	0.5025	0.6675
Solyc01g005280	176.227	Expressed	10.23	6.24	9.75	11.05	7.09	3.565	4.2575	5.0825	3.74	3.34	5.195	11.4225	7.895	12.11	5.1325	1.73	0.0333333	3.6175	0.8025	0.505	0.1575	0.4975	0.235	0.275	0.3025	0.2275	0.29	0.28	0.2825	0.2825	0.325	0.5175	7.74333	0.96	0.5525	0.3725	0.3575	0.085	0.165	0.0525	0.0225	0.175	0	0.075	0.055	0.195	0.0475
Solyc01g005290	56.4633	Expressed	0.353333	0.71	1.2475	1.8575	1.7675	0.3925	0.5375	0.9875	1.7725	2.375	3.8725	12.065	9.8975	14.3575	12.2675	10.23	0	0.445	0.2025	0.8925	0.455	0.1775	0.2025	0.1975	0.8425	0.9125	1.0375	3.435	4.16	4.6925	5.185	7.64	0.27	0.106667	0.38	0.2725	0.1625	0.0425	0.055	0.1175	0.525	0.675	0.235	0.9425	0.955	0.8725	1.16
Solyc01g005300	140.74	Expressed	6.65	22.565	50.325	72.2625	80.21	78.1725	74.9675	79.92	54.9725	62.4	59.1575	41.2	50.3075	45.81	49.86	76.7525	19.94	27.7625	58.515	83.88	76.245	68.605	81.845	82.5625	55.69	59.3075	55.445	63.0125	59.0625	70.185	49.845	74.3575	24.6	8.36	73.25	94.36	95.2275	117.123	124.295	95.0825	44.2175	53.285	58.6975	77.485	79.65	62.3725	65.0425
Solyc01g005310	1.04	Expressed	0.403333	0	0.025	0	0	0.0225	0	0	0	0.0325	0.055	0	0.045	0	0	0.03	0.593333	0	0	0.05	0	0	0	0.035	0	0	0	0	0	0	0	0.0325	0.546667	0.07	0.035	0.05	0.2875	0	0.2375	0.2775	0	0.0275	0	0	0.035	0.0175	0
Solyc01g005320	1.78333	Expressed	0.583333	0.18	0.0725	0.15	0.085	0.0525	0.055	0.1125	0.0275	0.09	0.045	0	0	0.0575	0	0.0225	0.13	0.17	0.115	0.215	0.05	0.03	0.095	0.05	0.025	0.025	0.0525	0	0.0325	0	0.0275	0.0225	0.03	0	0	0.1275	0.095	0.135	0.0625	0.2825	0.03	0.025	0	0.0225	0	0	0
Solyc01g005330	176.197	Expressed	121.43	139.305	145.495	104.125	126.415	125.735	130.845	126.422	83.0475	84.635	82.99	46.3725	45.0675	41.39	30.4225	32.8625	95.1833	152.363	107.03	102.603	108.802	115.468	99.0975	117.325	78.5025	64.9475	67.02	36.635	34.4375	30.9375	27.9825	35.6575	87.3867	103.303	90.155	96.9875	87.44	83.28	94.265	86.07	21.5475	19.3075	23.7225	15.19	13.775	10.4575	11.7025
Solyc01g005340	61.7125	Expressed	9.51	5.4475	8.5375	12.965	30.6075	24.375	33.325	37.34	26.25	32.49	35.89	27	31.515	32.7675	29.16	46.04	4.19667	6.39	8.625	20.6775	32.3775	29.0475	34.34	33.345	31.4875	34.2775	36.7225	30.765	26.6	31.8475	26.525	41.3575	9.88667	3.53	10.37	28.1075	46.3425	46.67	61.7125	49.175	19.06	23.7825	26.6725	23.1825	24.5875	23.82	24.92
Solyc01g005350	0.0575		0	0.0225	0.025	0	0.025	0	0	0.03	0	0	0.03	0	0	0	0	0	0	0.0275	0.0575	0.05	0.045	0	0	0.0325	0	0	0.0325	0	0	0	0	0	0	0	0.025	0	0	0	0	0	0	0	0	0	0	0	0
Solyc01g005360	4.6175	Expressed	0	0.5975	0.5275	0.785	1.845	2.685	1.83	2.8375	3.3775	3.77	3.275	4.565	2.8125	3.5275	2.7575	2.44	0.22	0.325	0.2475	0.4275	1.0475	1.015	1.49	1.2825	3.2375	3.145	3.41	3.3425	2.68	2.725	1.7975	2.1125	0.0866667	0	0.195	0.2725	1.43	2.44	1.5675	2.6175	3.965	3.14	3.4425	2.9275	1.56	3.22	2.8625
Solyc01g005370	48.4067	Expressed	11.9033	9.2175	6.32	9.6325	10.98	14.26	15.4225	13.5325	21.035	23.0325	18.9325	28.6975	22.865	23.46	18.07	17.795	36.17	7.8175	5.79	5.3625	7.975	9.3075	10.99	11.4275	26.605	23.4525	24.0775	21.0425	19.785	20.2075	16.755	17.9025	6.56333	4.30667	3.62	6.19	9.8425	14.6	12.705	14.8375	23.79	25.3525	21.4825	23.1425	20.9475	20.025	22.1375
Solyc01g005380	67.39	Expressed	16.6067	15.9725	17.465	15.385	13.8525	11.5225	11.5275	13.1125	12.2025	13.1525	14.5275	11.065	13.9075	13.6375	11.03	15.815	36.8667	16.3375	21.6175	14.6575	10.8575	11.4275	10.435	10.8	13.32	13.495	12.38	14.5825	12.895	13.0725	13.8375	15.6	45.8767	53.6167	14.2975	14.3925	12.715	9.315	11.22	10.29	5.4625	6.2375	6.0725	7.08	5.665	6.1075	5.795
Solyc01g005390	24.035	Expressed	0.11	0.545	0.0975	0.18	0.2225	0.625	0.625	0.09	2.0575	0.7625	0.045	3.855	1.385	0.6625	0.4775	0.2775	0.206667	0.74	0.2625	0.21	0.305	0.18	0.155	0	0.9025	0.355	0.1875	1.905	0.44	0.335	0.145	0.1125	0	0.116667	0.57	0.45	0.2575	0.1425	0.2675	0.3175	1.5625	0.785	0.4225	0.8575	0.47	0.4275	0.1975
Solyc01g005400	117.278	Expressed	3.28	2.7875	1.475	1.045	0.75	0.75	0.53	0.475	0.5225	0.4775	0.57	1.1775	0.5675	0.97	0.915	1.335	0.88	5.0375	2.59	1.16	1.025	1.16	0.925	0.83	1.4575	0.7775	1.0225	1.26	1.0975	1.3625	1.14	1.505	0.163333	0	8.025	5.43	2.7475	2.91	3.5675	3.3175	1.47	1.3475	1.025	0.72	1.3775	1.075	0.66
Solyc01g005410	30.2075	Expressed	0	1.8625	8.19	30.2075	22.9825	26.45	23.655	29.015	10.02	10.75	9.3175	0.805	0.555	0.24	0.0925	0.24	0.133333	1.2	3.125	5.155	8.665	14.4425	7.2325	7.4975	0.9225	0.425	0.6175	0.11	0.1025	0.2375	0.1075	0.2325	0.386667	0.233333	0.615	2.86	5.075	1.7025	2.12	2.7725	0.44	0.3	0.66	0.15	0.1925	0.4775	0.285
Solyc01g005420	14.9125	Expressed	0	0.1625	0.2325	0.1975	0.4775	0.5575	0.5925	0.205	0.6825	0.065	0.17	0.2325	0.0225	0	0.0225	0	0	0.825	0.5275	0.34	0.085	0	0	0	0	0	0.02	0	0.02	0	0	0	0	0.33	3.7275	1.7525	0.315	0.175	0.03	0.04	0.06	0	0.0275	0.02	0	0	0
Solyc01g005430	16.8	Expressed	7.53	8.0725	6.74	6.7525	5.435	6.795	5.1875	4.3	9.51	7.88	6.02	8.7875	6.6075	5.3875	6.0325	6.69	5.07333	8.595	6.7225	6.275	4.7075	6.2225	7.3475	5.5825	7.3225	5.8625	6.0625	5.2675	5.085	4.5075	4.4625	5.005	14.0167	3.37667	8.1975	9.3075	9.2225	14.14	12.01	10.0075	8.345	6.5775	8.2425	6.14	5.5575	5.125	5.1325
Solyc01g005440	413.1	Expressed	69.3167	288.78	308.02	192.365	165.45	155.827	169.765	182.278	86.9	99.6575	105.953	52.815	58.07	46.9075	44.355	46.055	141.36	297.752	330.483	233.8	235.105	209.85	214.025	206.43	66.9625	57.8425	71.195	43.925	41.205	47.9875	36.525	41.075	124.737	156.603	336.98	388.592	295.418	182.825	191.468	175.42	32.295	33.335	37.045	43.795	44.96	40.29	42.2975
Solyc01g005450	16.2	Expressed	4.92667	7.1675	5.905	6.67	5.5575	6.795	7.8675	8.6875	5.275	6.08	5.39	3.675	2.2175	1.9075	1.5675	1.45	7.26667	6.1475	5.175	4.4425	4.99	8.44	5.295	8.185	5.115	3.585	4.47	1.72	1.65	1.3675	1.595	1.79	3.24	2.53	4.925	5.35	8.4325	6.88	6.4075	8.9875	3.5325	2.93	2.28	1.88	1.305	1.6825	1.5625
Solyc01g005460	22.25	Expressed	15.53	14.645	6.2925	4.4075	3.4075	2.0025	2.0875	2.6075	1.51	2.06	2.065	0.3875	0.615	0.445	0.465	0.5475	12.2333	13.29	5.3925	4.75	2.17	2.1225	2.46	1.57	0.6725	0.6025	0.55	0.4125	0.315	0.215	0.285	0.2775	0.996667	1.46333	4.4	2.6675	2.1975	1.6975	2.18	1.8	0.66	0.395	0.5425	0.4525	0.13	0.3775	0.3475
Solyc01g005470	23.365	Expressed	11.46	3.765	0.87	2.6475	2.5875	4.0525	5.05	5.145	19.5575	18.805	23.365	3.605	2.3975	2.825	1.065	0.4225	17.4767	1.54	0.2	0.1075	0.1525	0.87	0.435	0.79	1.9825	0.7825	1.695	0.805	0.4375	0.7925	0.4375	0.11	1.02	0	0.8675	0.22	0.19	0.095	0.1875	0.045	0.0225	0.0275	0.135	0.0425	0.035	0.135	0.0175
Solyc01g005480	15.7933	Expressed	6.31333	7.425	8	7.7175	8.3175	9.09	8.3575	9.19	7.135	6.1875	7.3275	4.3225	4.7925	4.1475	4.19	4.5475	6.21667	7.38	9.37	8.59	6.0025	6.0975	6.345	6	4.135	4.0075	4.9525	4.01	4.2325	3.91	3.0475	4.005	4.21333	3.92667	6.3675	8.4525	4.8425	4.3425	4.335	4.15	1.8325	1.7825	3.0375	2.0075	2.33	1.7175	1.8325
Solyc01g005490	39.655	Expressed	12.5167	22.8625	26.75	27.7825	28.75	28.655	28.7275	30.1325	33.2225	33.2625	29.52	26.7925	28.9475	25.04	20.8525	17.525	13.8933	28.4475	24.7	24.52	30.2	31.7375	33.0625	35.7025	37.66	36.4775	39.655	24.0275	24.8025	26.9575	21.5525	17.13	19.3833	6.97667	21.265	20.2725	27.8075	32.77	35.8325	30.8875	22.585	24.7525	25.365	20.445	19.89	18.8925	16.4475
Solyc01g005500	3.84667	Expressed	0	0	0	0	0	0.045	0.1625	0.06	0.8725	0.75	1.075	0.365	0.5	0.39	0.03	0.1175	0.03	0	0.025	0.025	0	0	0	0	0	0	0.0325	0	0.02	0.0575	0	0	0	0	0.025	0.0275	0	0	0	0	0	0	0	0	0	0	0
Solyc01g005510	0.435		0	0.2275	0.0925	0.05	0.1475	0.0325	0	0	0.0675	0	0.05	0.0225	0.0225	0.0275	0.095	0.0225	0	0.255	0.435	0.11	0.09	0.03	0.035	0.03	0.0925	0.025	0.02	0.02	0.02	0	0	0	0.23	0.0766667	0.05	0.0825	0.065	0.0225	0.0525	0.065	0	0.0275	0.0275	0.0425	0.0275	0	0.0375
Solyc01g005520	66.05	Expressed	3.72	63.8	66.05	58.38	52.6375	41.0125	38.7975	44.895	35.3	38.4125	38.325	32.455	29.9925	31.3125	30.855	37.6375	6.89333	51.4975	47.3875	37.8775	26.22	30.255	19.425	30.245	26.06	23.8925	28.7075	19.4775	21.4975	23.215	26.645	31.93	1.00333	3.07333	42.18	34.83	25.68	22.8675	21.765	23.9825	11.895	11.9775	11.6075	14.035	11.585	12.275	17.1
Solyc01g005530	46.3067	Expressed	13.1	13.4225	10.4975	17.415	16.3175	10.85	11.9775	14.7175	10.3875	11.97	12.035	8.4575	6.765	7.86	6.38	3.445	14.6133	16.0925	11.5525	15.33	13.75	12.475	10.9325	13.03	12.565	9.7725	12.18	6.355	4.9725	6.515	4.3025	4.7425	4.70667	2.37	18.0775	19.8125	15.175	11.9825	12.8575	12.5325	5.6875	5.5375	5.8575	5.145	4.895	5.145	5.49
Solyc01g005540	27.6825	Expressed	5.68667	25.675	21.94	14.8975	17.3825	14.0025	15.82	16.1225	15.7775	16.8775	15.385	14.2625	14.0575	12.27	12.4075	15.985	8.85333	26.1525	16.5925	18.875	11.4575	10.0825	7.73	11.0825	10.2675	10.38	10.925	11.75	14.49	13.76	13.195	20.4125	2.87667	6.46333	13.04	14.4775	9.4175	7.9875	6.76	7.655	6.35	6.8325	6.5325	8.5825	7.8575	7.25	9.8425
Solyc01g005550	274.978	Expressed	163.797	259.692	180.715	93.895	99.9575	80.7425	92.1175	107.245	72.5	83.7575	91.7525	45.8775	35.5975	34.7775	25.825	33.445	170.43	231.577	97.8375	70.795	45.46	49.395	50.48	61.72	48.14	46.2525	55.44	24.13	20.005	23.0925	21.3325	36.255	45.9033	38.1733	81.0075	48.6925	41.1575	40.005	44.32	46.8725	13.43	14.235	15.2675	10.595	9.7375	10.03	12.095
Solyc01g005560	1104.68	Expressed	41.25	79.97	97.9975	153.145	162.088	149.765	161.188	163.32	218.775	209.343	234.502	282.447	311.082	350.4	174.727	85.72	54.4633	111.808	145.25	120.623	108.545	98.4425	80.8625	107.24	327.277	325.317	348.885	202.662	175.868	231.02	105.045	63.5625	150.86	57.2833	40.03	54.815	27.28	11.7175	16.46	12.0225	54.6425	63.6375	55.425	83.4075	85.53	82.165	49.78
Solyc01g005570	139.697	Expressed	48.2533	38.38	22.885	34.585	25.1875	21.55	21.3325	25.0425	17.9325	19.4375	18.035	17.6625	14.7325	15.71	13.5	14.115	74.1567	33.0275	18.7475	19.095	16.0625	17.7925	15.56	18.7325	14.7325	14.1575	16.295	12.5175	9.4475	12.1625	11.31	11.2875	15.1067	7.03	13.27	17.15	10.7375	9.035	10.7575	9.165	6.095	6.035	6.37	5.955	4.245	5.1625	5.28
Solyc01g005580	76.0275	Expressed	14.31	75.1725	39.445	72.0575	36.515	36.6175	39.1725	39.325	37.635	43.2475	39.67	54.505	43.82	45.745	42.0525	39.4825	19.4267	60.515	33.3525	27.8025	25.59	33.335	27.3975	35.255	44.82	40.98	41.3275	43.7175	40.8375	42.185	36.795	37.2025	3.37667	4.52	33.985	28.485	25.14	32.83	33.7325	34.695	39.225	34.1775	30.41	43.2525	32.87	37.715	41.005
Solyc01g005590	208.243	Expressed	134.083	25.34	17.5	50.1725	20.37	29.545	33.385	30.145	4.2775	4.5575	5.3375	1.2875	1.15	0.9275	1.5625	3.8825	91.7067	21.17	29.035	17.9175	25.325	18.9425	34.2025	21.8925	1.5725	2.5375	2.165	1.9075	3.6	2.1275	6.075	7.3425	29.2067	31.3233	27.33	17.2175	14.34	7.3175	5.8875	8.8875	3.2	2.085	2.5225	4.375	6.525	6.3475	11.085
Solyc01g005600	217.083	Expressed	22.6633	24.6675	26.1775	42.83	45.59	43.74	46.81	49.0975	44.89	51.6525	53.9625	51.785	48.955	52.6125	53.39	71.6425	31.4633	23.35	29.17	44.3825	45.04	38.615	42.4125	44.4725	42.885	48.815	46.6	53.0125	51.8675	57.8775	50.575	73.865	72.8567	11.95	24.955	47.2875	53.39	50.1225	54.7275	45.9375	56.275	63.0025	61.485	66.065	73.3275	66.38	75.5425
Solyc01g005610	15.3167	Expressed	8.71667	0.0975	0	0.0275	0	0.17	0	0.0275	0.0275	0.0325	0.175	0.1425	0.0225	0	0	0.03	3.93	0	0.0475	0.18	0.0325	0.03	0	0.025	0.1275	0.03	0	0	0.02	0	0	0	4.71333	8.23667	0.0175	0.0225	0.0325	0	0	0	0.03	0.025	0	0.0775	0.0925	0	0
Solyc01g005620	518.527	Expressed	140.417	264.84	242.732	300.577	206.548	211.202	218.565	223.2	195.685	196.66	226.47	147.002	157.535	161.86	153.025	122.082	130.94	245.945	305.798	316.577	258.92	177.343	232.18	196.067	133.92	124.502	153.025	134.155	123.472	142.093	100.453	107.802	139.067	208.96	197.062	225.363	192.368	147.308	139.523	144.407	113.875	116.287	141.49	158.032	179.347	166.468	154.775
Solyc01g005630	0.26		0	0	0	0	0	0	0	0	0	0	0	0	0	0	0	0	0	0	0	0	0	0	0	0	0	0	0	0	0	0	0	0	0	0	0	0	0	0	0	0	0	0	0	0	0	0	0
Solyc01g005640	65.3433	Expressed	11.0533	12.0725	14.5625	17.3675	22.97	22.9725	24.4675	25.495	29.98	30.9475	31.43	32.5575	30.5175	33.175	27.9925	33.8025	10.93	12.27	13.0175	22.2225	20.2525	21.7225	17.3275	21.31	26.29	25.4075	25.925	29.9025	27.7125	30.515	24.67	32.595	14.56	1.25667	14.775	21.3675	16.6625	16.105	16.9525	14.665	17.66	18.4275	18.6875	20.5675	21.375	17.495	19.3925
Solyc01g005650	4.05	Expressed	0.636667	0	0	0	0	0	0	0	0	0	0.0225	0	0	0	0	0	1.20667	0.02	0.0575	0	0	0	0	0	0	0	0	0	0	0	0	0	0.446667	0.203333	0	0	0	0	0	0	0	0	0	0	0	0	0
Solyc01g005660	21.8	Expressed	0	0	0	0.0525	0.2775	0.2975	0.4175	0.0825	0.08	0.2075	0.22	0.0925	0.06	0.0225	0.05	0	0.1	0.28	0.0575	0.21	1.175	0.48	0.335	0.185	0.1225	0.195	0.2225	0.1975	0.175	0.1725	0.135	0.045	0	0	1	3.06	7.615	3.455	3.2075	2.735	4.195	2.015	1.6325	1.71	1.2075	0.895	0.765
Solyc01g005670	29.3533	Expressed	9.30333	6.6725	6.33	9.6075	10.02	9.9175	10.2575	10.6425	8.6425	8.49	9.23	5.85	5.4775	5.075	5.7825	5.5575	13.0933	7.095	5.38	7.3425	7.7175	7.61	6.895	9.705	7.335	6.8225	8.46	4.835	4.7675	5.2475	4.74	5.66	12.6767	5.85	5.3525	5.8875	7.515	6.635	7.7025	5.915	3.5125	4.0925	4.4275	3.59	3.7775	3.6325	3.9625
Solyc01g005680	7.50333	Expressed	5.27333	0.0775	0.1375	0	0.0525	0.0225	0	0	0	0	0.0275	0.07	0	0.0225	0	0.0225	3.31	0.06	0.05	0.155	0	0	0.095	0.05	0.025	0	0.035	0	0	0	0	0	2.03333	3.84	0.05	0.0225	0	0.0425	0	0	0	0	0	0	0	0.0175	0
Solyc01g005690	291.157	Expressed	106.33	84.59	119.84	93.52	125.817	113.132	117.442	132.1	62.445	64.0275	69.7725	41.365	36.885	36.965	29.7875	27.69	112.587	81.18	95.0875	100.115	101.45	107.948	93.54	117.052	56.4275	55.0125	59.31	35.8675	30.015	31.9325	24.5375	33.9725	69.5067	100.157	85.3325	100.16	111.93	78.905	91.1275	80.9625	27.4075	21.88	29.5375	17.775	16.5925	15.5175	16.735
Solyc01g005700	22.615	Expressed	13.9133	9.5175	10.585	9.435	15.9975	17.205	16.79	22.615	12.995	14.8425	18.4125	9.08	8.905	8.45	7.77	9.1125	9.41	11.18	11.005	15.39	16.79	17.6525	14.9025	19.705	10.7725	11.7675	11.8925	9.275	7.695	8.55	8.6875	10.31	16.75	3.40667	10.555	14.4825	16.1775	13.5	15.8175	13.2525	5.7875	6.925	7.91	6.5525	6.5025	5.305	6.64
Solyc01g005710	0.35		0	0	0.03	0.05	0.155	0.1925	0.18	0.2875	0.0275	0.1925	0.1575	0.0475	0.0575	0.0275	0	0.03	0	0	0	0	0	0.09	0.06	0.1625	0	0.025	0.06	0	0	0	0	0	0	0	0	0.03	0	0.0975	0.1025	0.0225	0	0	0.025	0	0	0	0
Solyc01g005720	0.3		0	0	0.03	0.0275	0.065	0.1275	0.1325	0.175	0.0275	0.13	0.0825	0	0	0.0275	0	0.03	0	0	0	0	0	0.03	0.0275	0.0575	0	0.025	0.025	0	0	0	0	0	0	0	0	0.03	0	0.0475	0.1025	0	0	0	0.025	0	0	0	0
Solyc01g005730	0.106667		0	0	0	0	0	0	0	0	0	0	0.06	0	0	0.0275	0	0	0	0	0	0.0275	0	0.0575	0	0	0	0	0	0	0	0	0	0	0	0	0.0375	0	0	0	0	0	0	0	0	0	0	0	0
Solyc01g005740	0.03		0	0	0	0	0	0	0	0	0	0	0	0	0	0	0	0	0	0	0	0	0	0	0	0	0	0	0	0	0	0	0	0	0	0	0.025	0	0	0	0	0	0	0	0	0	0	0	0
Solyc01g005750	0.1325		0	0.045	0	0	0	0	0	0	0	0	0	0	0	0	0	0	0	0.02	0.1325	0	0	0	0	0	0	0	0	0	0	0	0	0	0	0	0	0	0	0	0	0	0	0	0	0	0	0	0
Solyc01g005760	2.11667	Expressed	0.39	0.0325	0.105	0.125	0.0575	0.1325	0.0775	0.1725	0.0825	0.19	0.1525	0.0225	0	0.0575	0.025	0.06	0.163333	0	0	0	0.085	0.1475	0.125	0.1225	0.06	0	0.045	0	0.0325	0	0	0	0.153333	0	0	0.1125	0.0325	0.1225	0.0825	0.065	0	0.03	0	0	0	0	0
Solyc01g005770	17.16	Expressed	1.73	0.64	0.385	0.7825	0.565	0.3225	0.285	0.5275	0.36	0.7125	0.51	0.295	0.4425	0.4425	0.3175	0.67	2.24333	1.205	0.58	0.5475	0.32	0.2325	0.22	0.345	0.295	0.1975	0.235	0.255	0.1475	0.2225	0.2125	0.3875	2.23667	0.593333	0.6875	0.775	0.39	0.535	0.385	0.2675	0.1	0.3	0.345	0.4275	0.3575	0.135	0.2475
Solyc01g005780	0.29		0.133333	0.0325	0.075	0.025	0.1475	0.055	0	0.0575	0	0	0	0	0	0	0.03	0	0.0333333	0.1475	0.0675	0	0.045	0.03	0.0575	0	0.025	0	0.035	0	0	0	0	0	0.0233333	0	0	0.045	0.0325	0.0425	0	0	0	0	0	0	0	0	0
Solyc01g005790	7.055	Expressed	1.51333	3.1075	3.5575	2.375	5.795	4.6425	5.115	4.7425	5.13	4.97	4.765	3.6675	4.5725	4.2275	3.825	4.7225	0.726667	3.4025	2.3575	4.025	4.8275	5.335	4.1375	4.72	4.6725	4.345	3.4275	3.81	3.7375	2.94	3.42	4.7725	0.96	1.11333	4.1275	5.55	5.5025	5.5	5.325	5.3375	3.71	4.0525	4.1975	3.6375	3.1525	3.21	3.6275
Solyc01g005800	26.97	Expressed	0	1.8125	1.29	0.855	1.06	11.91	6.21	0.515	7.7025	2.29	0.37	6.9625	2.1025	0.1675	0.475	0.2475	0.0333333	1.5375	0.475	0.465	0.25	1.6225	0.645	0.035	0.9525	0.3975	0.2125	0.8525	0.18	0.0575	0	0.0925	1.07333	2.35	0.5025	0.6125	0.355	0.385	0.1225	0.0225	0.325	0	0	0.17	0	0	0
Solyc01g005810	144.615	Expressed	93.7267	88.165	85.77	125.853	133.548	136.405	129.21	120.245	130.31	123.625	113.02	83.9275	65.77	56.0075	64.01	63.52	113.393	85.75	85.2375	106.528	109.82	124.918	100.067	119.147	106.522	87.9225	106.575	59.49	55.75	51.0075	60.9525	66.92	19.63	33.3367	89.72	105.662	95.43	114.305	95.6	121.605	76.2775	66.4525	59.1	74.0975	63.0925	66.1	80.765
Solyc01g005820	392.31	Expressed	132.803	369.635	392.31	283.317	197.912	165.72	179.885	187.743	164.512	151.447	152.865	119.975	115.845	106.9	114.33	110.067	120.54	321.9	298.103	162.923	143.775	159.423	113.31	174.825	166.822	144.748	189.613	112.123	132.173	102.975	119.502	132.87	89.69	106.557	260.467	169.298	132.75	106.558	100.662	112.905	96.7925	89.095	96.6825	98.01	90.5275	83.95	106.252
Solyc01g005830	81.5575	Expressed	17.0033	72.2775	64.0975	31.0275	25.475	23.8425	27.6925	26.765	19.45	19.7875	21.3225	11.3875	12.1725	10.815	10.765	8.8625	18.37	69.3175	59.7825	34.795	26.5325	23.54	22.0475	25.125	12.115	13.2625	11.3025	11.615	7.1225	9.6225	6.5325	6.0975	8.75	35.1033	50.015	34.08	28.1825	23.335	22.1925	23.51	9.2225	6.3425	9.9275	9.3175	9.6975	8.82	10.305
Solyc01g005840	40.22	Expressed	21.1167	19.2875	16.21	18.36	9.71	8.85	10.875	11.3575	14.0525	16.305	17.2225	17.245	18.57	16.72	18.755	18.475	31.26	20.01	17.7	12.2175	10.26	8.0975	9.92	9.88	12.235	12.58	11.49	17.7225	12.0625	17.8825	12.3975	13.1	21.6767	16.9	15.14	10.815	11.2125	12.8025	11.5775	11.7775	15.615	14.0775	14.7925	19.01	20.7625	17.0125	18.62
Solyc01g005850	1.905	Expressed	0	0.6675	0.825	0.885	0.74	0.615	0.68	0.795	0.4525	0.335	0.6775	0.275	0.2725	0.1525	0.2475	0.3925	0	0.555	0.8875	0.8175	0.59	0.5775	0.615	1.165	0.7125	0.8475	1.0625	0.2625	0.39	0.1975	0.565	0.8925	0	0	1.5875	1.1625	1.0725	0.3325	0.435	0.575	0.4875	0.43	0.2475	0.335	0.32	0.3275	0.585
Solyc01g005860	0.193333		0	0	0	0	0	0	0	0	0.0275	0	0	0	0	0	0	0	0	0	0	0	0	0	0	0	0	0	0	0	0	0	0	0	0	0	0	0.0225	0	0	0	0	0	0	0	0	0	0	0
Solyc01g005870	3.31333	Expressed	0	0.0225	0.3875	0.675	1.025	1.335	0.905	0.8125	0.4425	0.2175	0.5475	0.12	0.0525	0.13	0.05	0	0	0.0275	0.0525	0.375	0.2875	0.52	0.38	0.39	0.085	0.055	0.2975	0	0	0.0675	0	0	0	0	0	0	0.0325	0.0875	0.025	0.05	0.0525	0	0	0	0	0	0
Solyc01g005880	0.0575		0	0	0	0	0	0.0325	0	0	0	0	0.03	0	0	0	0	0	0	0	0	0	0	0	0	0	0	0	0	0	0	0	0.03	0	0	0	0	0	0	0	0	0	0	0	0	0	0	0	0
Solyc01g005890	0.0575		0	0	0	0	0	0	0	0	0	0	0	0	0	0	0	0	0	0	0.0575	0	0	0	0	0	0	0	0	0	0	0	0	0	0	0	0.0425	0	0	0	0	0	0.0525	0	0	0	0	0	0
Solyc01g005900	30.8133	Expressed	14.0667	8.7525	6.91	8.3825	6.5875	6.035	6.0875	5.9125	5.02	5.565	4.6575	4.5875	4.165	3.86	3.3875	3.23	7.27333	9.64	7.9275	8.5825	4.2025	6.3	5.33	5.375	5.2225	5.255	4.9625	4.605	4.3425	4.4225	4.1875	4.5225	5.07667	2.57	6.53	4.36	2.975	3.345	2.555	2.8075	2.975	2.8875	3.31	2.4475	2.56	2.8725	2.025
Solyc01g005910	48.6067	Expressed	42.4167	15.8	14.805	18.4475	13.0025	13.7825	11.97	14.78	18.1675	18.575	19.2825	14.1225	14.775	14.0325	14.53	14.2775	45.0567	16.085	14.52	14.4	9.8475	9.87	9.155	9.89	12.2	11.7175	11.25	13.645	11.4275	15.3	12.6625	16.0375	18.2833	24.1633	12.83	11.295	10.0575	12.6825	11.0625	9.135	9.2225	8.88	10.875	10.2675	12.7225	10.74	12.185
Solyc01g005920	4.4375	Expressed	0.04	0.475	0.9175	0.865	0.895	0.355	0.605	0.815	0.335	0.495	0.4675	0.3275	0.35	0.2775	0.185	0.125	0.1	0.175	0.79	2.21	0.72	0.27	1.07	1.12	0.3325	0.555	0.5725	0.435	0.3025	0.3075	0.135	0.165	0	0	0.5025	0.325	0.0625	0.0675	0.12	0.1475	0.055	0.135	0.075	0.0225	0.035	0.0775	0.0575
Solyc01g005930	31.22	Expressed	4.74	2.635	2.83	8.095	9.73	11.25	10.94	13.855	17.865	20.5225	20.7275	21.3825	18.98	20.99	21.7625	31.22	3.46333	3.1675	3.4075	8.6625	8.285	8.23	9.245	10.0025	12.455	15.2525	12.17	19.305	13.98	20.285	16.55	20.7525	3.72667	2.95667	5.3575	8.91	12.6525	15.1925	17.3	13.34	18.8725	21.505	22.085	18.3875	20.6975	17.4625	19.0725
Solyc01g005940	7.31333	Expressed	4.48667	0	0	0	0	0	0.0225	0	0	0	0	0	0.0225	0.0275	0	0.0525	4.83	0	0	0.025	0	0	0	0	0	0.015	0	0	0	0.025	0	0.0125	3.32	2.64667	0.0175	0.0275	0	0	0	0	0	0	0	0	0	0	0.0225
Solyc01g005950	85.7875	Expressed	25.4767	85.7875	73.3675	85.1975	68.3575	67.0575	65.485	72.425	67.1275	69.795	72.45	63.1725	56.34	56.235	45.1725	43.5625	36.02	79.865	68.5425	65.55	64.1475	61.6525	57.86	60.4725	63.095	63.6025	61.235	51.2175	41.8925	47.2175	39.6575	46.2125	30.3133	26.41	58.8575	57.63	48.1	54.0675	54.115	51.045	26.75	27.335	32.63	24.5975	23.295	23.07	27.5325
Solyc01g005960	200.313	Expressed	143.227	55.3275	58.5675	37.9275	37.075	35.5675	38.57	36.54	37.135	37.8125	39.6075	33.235	41.605	41.335	37.4175	41.285	175.093	68.335	55.7825	43.315	39.6175	32.755	30.3925	33.715	29.4775	30.69	30.5175	32.8925	33.6875	35.6325	32.1525	36.16	150.503	144.95	52.455	40.7175	32.3025	30.51	30.5575	26.595	25.395	29.755	33.335	31.335	37.52	31.24	31.27
Solyc01g005970	21.4367	Expressed	10.1833	4.0925	4.4225	4.79	9.0675	8.665	9.065	9.18	7.315	7.865	8.39	5.56	4.8225	4.895	4.4125	4.185	4.46667	5.5775	4.5325	10.33	10.14	10.765	9.1225	9.1375	7	6.5225	6.6175	4.3425	4.6	4	4.245	5.9475	8.22333	6.50667	4.725	8.4625	7.6525	7.1675	7.705	6.9525	4.225	4.29	4.4	3.5525	3.6275	3.24	3.8325
Solyc01g005980	18.51	Expressed	1.23	13.4025	9.115	8.1725	10.0825	8.6	8.455	8.4575	7.8425	7.045	6.2425	4.0925	3.1675	2.0325	2.345	1.33	0.2	12.4525	9.8125	9.255	6.725	8.9975	6.5375	7.8275	6.815	6.035	6.2575	2.4825	1.61	1.255	1.1175	1.36	0.51	0.263333	10.475	7.415	9.0125	11.1525	11.685	13.1025	2.72	2.7125	1.8675	0.62	0.345	0.32	0.5775
Solyc01g005990	327.333	Expressed	119.277	64.905	41.8375	14.01	8.51	11.2675	10.87	7.1275	2.31	3.8625	2.6725	0.1625	0.1825	0.1675	0.085	0.0525	97.96	46.715	14.4975	4.74	8.0975	8.5375	10.4925	5.865	1.9275	2.7225	1.9775	0.1075	0.06	0.0575	0.0275	0.0125	0.89	2.65667	4.385	0.6125	1.1225	0.6775	0.5275	2.015	0.0225	0.1475	0.075	0.0425	0	0	0
Solyc01g006000	30.5925	Expressed	19.4533	12.555	12.2375	14.49	21.9	19.305	20.44	25.0525	21.1775	23.6375	22.365	14.885	15.265	15.235	13.325	15.035	29.7633	11.3275	9.2525	19.0875	20.24	20.09	16.295	22.655	15.6875	16.2625	18.3875	14.13	14.7625	15.7075	15.41	19.1175	10.3	4.08	9.4825	14.97	15.845	17.2325	20.6075	19.2925	9.25	9.1225	11.6375	9.5125	9.9275	7.4225	10.0225
Solyc01g006010	52.15	Expressed	15.27	15.345	24.735	20.655	27.5475	33.3275	33.77	29.425	24.695	23.5625	25.23	24.065	27.875	25.0575	28.7	35.485	0.943333	15.4725	26.9725	31.5625	32.1775	33.4675	23.8025	37.32	33.1	36.105	40.8775	28.7875	35.4175	28.225	44.4325	52.15	8.59667	7.32	24.765	28.945	30.9075	25.75	32.685	31.515	21.88	23.3325	23.3875	20.4225	18.785	24.0375	29.21
Solyc01g006020	85.06	Expressed	36.27	39.37	68.27	57.23	31.7125	27.95	30.095	31.1475	23.8275	26.255	24.7575	28.2075	30.1275	30.1275	27.435	34.7725	41.2433	40.805	65.5275	33.5	26.7225	23.54	25.035	25.82	27.885	30.8875	32.635	24.54	30.9325	27.6225	30.06	34.7375	53.8833	62.1	71.165	49.6075	48.195	45.7575	39.725	43.75	20.435	24.9225	18.9675	30.455	23.52	26.8275	26.8175
Solyc01g006030	44.4175	Expressed	1.70333	18.38	19.02	17.5725	19.2025	19.3975	17.8025	17.76	18.3975	19.23	15.8925	19.325	17.675	16.73	16.7075	15.6725	3.35	20.13	16.8475	15.155	17.15	17.4425	13.965	19.0325	18.03	17.7575	21.6575	16.3825	18.2125	15.545	15.54	19.42	2.34667	0.84	16.8825	21.73	18.7975	18.355	19.9775	18.2925	13.465	13.5375	13.6775	13.035	11.8825	11.57	14.255
Solyc01g006040	48.4175	Expressed	0	8.1775	11.295	7.8575	21.3175	20.7675	20.54	21.67	22.2525	23.2725	21.6825	21.8975	21.175	19.99	16.775	18.945	0	9.8925	9.51	20.4525	22.205	20.4075	16.695	22.205	21.57	22.4825	23.37	20.93	20.2025	18.7125	19.5675	22.995	0.693333	0.0833333	10.455	23.0875	21.2225	19.1125	25.4975	21.605	15.3675	14.7725	17.21	16.015	14.3525	14.76	16.2225
Solyc01g006050	4.92	Expressed	0	0	0	0	0	0	0	0	0	0.0325	0.03	0.3075	0.125	0.23	0.2775	0.7125	0	0.0225	0	0	0.0225	0.03	0.0325	0	0	0	0	0.02	0	0	0	0.095	0	0	0.06	0.045	0.065	0	0.0225	0.0225	0	0.03	0	0.02	0	0.0475	0
Solyc01g006060	622.257	Expressed	0.206667	3.25	2.2025	0.7575	0.215	0.1275	0.08	0.055	0	0	0.0225	0	0	0	0	0	2.32333	2.6375	3.005	0.6125	0.1775	0.09	0.09	0.06	0	0.025	0.02	0	0	0	0	0	0.0233333	0.553333	0.7675	0.0275	0	0	0	0	0	0	0	0	0	0	0
Solyc01g006070	0.12		0	0.0675	0	0.0275	0	0	0	0	0	0	0	0	0	0	0	0	0	0	0	0	0	0	0	0	0	0	0	0	0	0	0	0	0	0	0	0	0	0	0	0	0	0	0	0	0	0	0
Solyc01g006080	5.88	Expressed	0	0.0325	0.0475	0.0475	0.0525	0.065	0.0325	0	0.0275	0.025	0.03	0	0	0	0	0.06	0	0.02	0.075	0.1325	0	0	0	0	0	0	0.025	0	0	0	0	0	0	0	0.085	0.725	0.065	0.02	0	0.0275	0	0	0	0	0	0	0
Solyc01g006090	17.36	Expressed	9.73667	15.505	14.7825	14.325	10.6825	8.8875	9.9275	8.5925	8.0325	7.28	7.1625	2.6775	2.5625	2.2525	3.115	4.445	4.9	13.925	12.3125	10.97	6.675	6.9875	6.385	8.25	5.815	4.8675	5.82	2.735	2.7525	2.48	3.46	4.3975	3.39	5.12	10.875	8.825	6.7775	6.08	5.6025	6.69	5.425	6.2175	4.56	3.385	2.8975	3.3725	3.895
Solyc01g006100	58.81	Expressed	6.35333	42.7425	17.485	6.75	5.195	4.035	4.3375	4.7825	4.5325	5.2275	4.3325	0.6025	0.465	0.395	0.31	0.27	4.70667	51.1175	13.475	8.79	3.6075	3.4075	2.435	4.29	3.5825	2.18	2.5525	0.3225	0.39	0.2275	0.555	0.35	0.36	4.76	13.0825	7.27	3.12	2.4775	3.4025	2.525	0.16	0.35	0.5825	0.13	0.0625	0.0175	0.0725
Solyc01g006110	112.207	Expressed	11.8267	52.2475	65.4675	59.33	60.845	72.38	73.57	71.005	81.9525	74.285	75.525	94.615	90.325	85.7	73.37	96.8	15.4233	49.785	48.6825	43.325	51.525	66.11	47.65	72.655	93.005	86.81	93.4825	86.9325	93.29	89.265	96.5025	112.207	12.1233	4.41333	47.65	48.2775	43.145	55.925	52.4125	57.0325	52.9425	50.605	44.5975	68.29	61.075	60.355	74.125
Solyc01g006120	306.485	Expressed	50.1633	85.3875	105.54	108.51	142.64	141.08	135.282	138.548	141.498	143.55	143.463	119.855	136.135	130.012	116.632	124.968	56.0733	96.3325	94.515	155.715	151.82	150.657	137.282	143.847	128.39	122.493	125.213	124.638	117.707	125.422	111.67	118.558	181.163	19.94	91.5875	146.137	123.948	130.695	139.415	121.08	97.2675	101.865	114.703	106.075	112.785	103.775	105.397
Solyc01g006130	106.907	Expressed	8.66333	80.3175	84.44	95.9975	95.78	78.58	79.5725	89.7225	51.3025	55.055	53.075	41.6325	36.2175	40.5175	40.9925	38.7625	4.45667	66.1225	70.0775	79.0375	70.105	83.7675	61.1675	87.0925	49.4475	47.335	62.7	31.2175	37.18	37.7775	44.245	49.4075	3.16	5.44333	74.8025	88.1225	74.0775	45.335	39.1375	52.0525	32.185	32.545	31.92	35.585	36.155	38.0925	42.24
Solyc01g006140	8.2	Expressed	2.52333	4.3275	4.105	1.965	1.0325	0.9375	1.075	1.7375	1.4325	1.895	1.7025	0.665	0.745	0.485	0.8675	1.3975	0.976667	5.21	4.125	1.7825	0.745	0.8375	0.585	1.0925	0.4975	0.91	0.7625	0.845	1.475	0.5375	0.995	1.1675	0.823333	1.01333	4.9	1.9025	2.015	1.8075	1.755	2.525	0.4275	0.3875	0.4275	0.4525	0.5025	0.4225	0.465
Solyc01g006150	64.4633	Expressed	8.97333	56.91	47.2525	57.075	23.5825	16.96	17.7925	18.7	14.6475	13.0425	12.05	7.575	6.6	5.7825	6.835	7.3875	17.63	44.37	28.8775	26.4375	15.515	11.47	9.92	14.6075	11.74	12.8275	10.1425	5.8475	6.2075	5.38	5.02	7.7875	20.2267	9.75667	17.4375	12.9925	5.4675	7.7275	9.81	6.6725	14.57	16.9075	18.315	13.9075	16.305	14.82	15.97
Solyc01g006160	3143.08	Expressed	1516.14	545.925	317.658	449.283	215.338	200.067	178.42	221.012	209.502	212.632	259.798	104.005	122.765	110.123	115.903	115.845	1549.81	480.598	415.26	277.512	235.968	145.653	224.505	131.54	120.793	124.287	127.263	97.04	62.995	81.5425	57.3125	66.4725	1928.28	2839.17	305.072	202.773	166.732	121.12	103.892	118.272	122.055	117.815	125.9	87.715	101.407	90.5375	94.9
Solyc01g006170	97.18	Expressed	45.4633	79.57	65.6425	72.8775	69.275	81.8775	67.365	85.5325	73.84	66.385	77.2175	35.795	52.235	44.92	50.105	48.845	26.8067	70.8925	75.5175	74.03	72.785	61.0125	97.18	49.095	45.2675	51.59	46.3525	39.9875	25.8325	30.69	30.355	34.535	21.3167	36.31	64.13	42.955	58.435	61.2575	36.1525	56.8875	61.1525	35.13	49.8075	39.05	36.905	43.405	43.56
Solyc01g006180	17.125	Expressed	7.69667	11.375	13.6925	12.255	14.82	11.3575	11.7775	13.8425	11.01	13.2375	13.0975	7.255	7.1175	6.7475	6.1475	7.7025	2.95333	14.14	12.375	16.2675	12.505	11.405	11.3275	12.745	8.115	8.7575	10.145	5.9625	6.39	5.9375	6.3575	6.6475	12.8367	7.1	13.3525	12.4225	11.5175	12.215	11.4775	11.9875	5.87	6.2325	8.125	3.885	4.165	3.79	4.075
Solyc01g006190	243.26	Expressed	144.253	61.32	46.1125	52.0225	44.0875	41.005	45.7825	45.1575	57.4425	59.28	56.725	56.5	58.3275	57.9975	55.585	66.5975	80.8833	54.14	35.775	32.0775	36.025	40.18	35.2825	42.36	61.1725	57.0075	60.605	57.09	55.3225	59.955	56.2025	68.345	217.453	52.35	26.8325	23.98	23.455	29.85	28.9975	24.74	36.625	37.7575	41.9625	53.0275	55.6925	46.6425	56.3625
Solyc01g006200	19.11	Expressed	19.11	6.3725	4.14	5.275	5.12	2.9625	3.73	5.3575	5.5875	8.005	8.23	6.535	5.17	5.4525	5.705	5.735	8.35	6.3925	3.88	5.0925	4.21	3.3	3.5175	4.945	4.865	6.1575	6.6875	4.4975	4.94	5.06	3.7725	5.8975	18.4933	6.62333	3.305	4.5125	4.98	5.59	5.98	4.2575	5.18	5.1575	6.325	4.335	5.3575	3.81	4.37
Solyc01g006210	9.6775	Expressed	9.02	8.79	6.2075	2.9325	2.52	1.4775	1.915	2.3725	1.5625	2.08	2.23	0.6425	0.9025	0.7325	0.585	0.9275	3.38333	9.6775	5.78	3.18	1.5175	1.1675	1.2325	1.1925	0.9125	1.275	1.415	0.7125	0.7025	0.71	0.615	0.845	3.37333	4.79667	4.705	2.32	1.0675	0.8975	1.3975	1.145	0.7325	0.8025	0.8825	0.505	0.45	0.4025	0.4725
Solyc01g006220	19.0133	Expressed	6.89333	11.5325	8.245	6.135	7.4325	4.3425	5.53	6.1275	4.065	3.9225	4.385	2.055	2.7175	2.285	1.28	1.49	19.0133	12.32	7.01	9.065	4.37	3.8575	3.625	3.9375	2.23	2.1	2.4	1.3425	1.355	0.9675	0.935	1.44	1.81333	4.69	8.8	9.725	6.055	4.955	5.6875	5.68	2.19	2	2.6775	1.145	1.7475	1.3	0.9275
Solyc01g006230	172.05	Expressed	60.78	22.6275	21.4125	21.9075	21.0975	19.835	21.9275	22.87	38.825	38.885	38.6275	49.995	51.62	53.625	46.5175	54.4075	76.9467	23.81	19.88	22.5175	17.275	18.775	19.145	18.6875	35.6925	37.7675	37.1175	44.9175	47.99	47.78	39.37	50.0325	69.2933	52.3033	20.5175	19.9	17.49	26.2725	28.1075	21.05	39.6025	41.44	47.3625	43.1525	50.6	43.04	40.3475
Solyc01g006240	13.2525	Expressed	2.8	1.425	1.3175	2.09	0.5925	0.58	0.76	0.9125	0.055	0.66	0.545	0.09	0.215	0.21	0.3025	0.0875	1.65	1.625	1.265	1.2025	0.7825	0.3925	0.625	1.075	0.2175	0.3175	0.9525	0.125	0.0625	0.5825	0	0	0.216667	0.386667	0.6575	0.3575	0.2275	0.0675	0.16	0.075	0.0225	0.0575	0.025	0	0	0	0.0175
Solyc01g006250	50.845	Expressed	1.91667	3.5575	2.2925	2.4875	2.425	2.1025	2.435	2.3775	2.315	2.8125	2.335	2.29	2.1975	1.8925	2.2825	1.72	0.563333	3.1925	2.03	1.1875	2.1625	3.29	1.64	3.185	3.4325	2.8475	4.0925	2.6675	2.3925	2.4675	2.5875	2.83	1.43667	0.456667	2.39	5.37	3.6975	2.555	2.5125	2.3425	1.475	1.9025	1.595	1.1625	1.2925	1.09	1.8975
Solyc01g006260	8.785	Expressed	1.97667	6.5375	6.88	7.9625	4.8075	4.3675	4.66	5.5225	3.4625	3.8175	4.645	2.5825	2.665	1.6625	1.7575	1.6525	2.60333	7.7175	6.39	4.675	3.605	3.47	3.7525	3.63	2.855	2.54	2.505	1.54	1.2375	1.26	1.24	1.735	3.88667	5.40333	6.5175	5.215	3.8425	2.91	2.825	2.7175	1.8125	1.775	1.8275	1.975	1.7525	1.755	1.9425
Solyc01g006270	0.616667		0	0	0	0	0	0	0	0	0	0	0	0	0.03	0	0.03	0	0	0	0	0.0275	0	0	0	0	0	0	0	0	0	0	0	0	0	0	0	0	0	0	0	0	0	0	0	0.0225	0.1025	0	0
Solyc01g006280	595.28	Expressed	43.6033	89.28	136.613	124.545	168.183	145.368	167.993	172.287	172.84	202.345	234.7	175.9	223.195	244.227	200.852	205.25	56.7667	104.03	139.355	185.072	152.947	126.213	132.477	157.32	192.213	217.292	231.375	288.493	353.88	333.572	296.835	256.12	145.83	66.88	145.972	175.825	195.023	168.803	207.868	197.315	130.407	138.673	164.68	493.165	532.97	552.298	595.28
Solyc01g006290	11.0325	Expressed	0	0.1225	0.12	0.3075	0.1475	0	0.0475	0	3.6275	1.485	0.5025	0.9525	0.735	0.325	0.2725	0.14	0	0.1025	0.025	0.3875	0	0	0.1125	0	1.26	1.4475	0.445	0.235	0.1875	0.19	0.21	0.17	0	0	0.0175	0.1075	0.0325	3.0425	3.1625	1.2475	7.7825	9.17	11.0325	3.63	3.9575	5.33	2.785
Solyc01g006300	4.5325	Expressed	0.0933333	0	0	0.1025	0.025	0.0225	0.0225	0	1.0125	0.2775	0.05	0.3175	0.1325	0.155	0.03	0	0	0.075	0.0325	0.1025	0.0325	0	0	0.025	0	0	0	0.0225	0.0525	0.0275	0.03	0.025	0	0	0	0.14	0.095	0	0	0.0275	0	0.0575	0	0	0	0.0175	0
Solyc01g006310	0.0225		0	0	0	0	0	0	0	0	0	0	0	0	0	0	0	0	0	0	0	0	0	0	0	0	0	0	0	0	0	0	0	0	0	0	0	0	0	0	0	0	0	0	0	0	0	0	0
Solyc01g006320	32.55	Expressed	17.4667	32.55	9.905	5.8425	2.045	1.5725	1.0725	1.3325	0.8475	0.485	0.43	0.385	0.385	0.235	0.24	0.14	4.29667	23.2475	7.14	2.5075	1.1425	0.72	0.8225	0.46	0.7175	0.5025	0.26	0.385	0.325	0.2075	0.1925	0.085	0.486667	2.41333	2.2225	1.16	0.1575	0.16	0.0525	0.1375	0.0275	0.03	0	0.0225	0.0275	0.0175	0
Solyc01g006330	11.8025	Expressed	0.396667	6.3875	5.9	1.9	0.68	0.3875	0.3775	0.7775	0.4075	0.1225	0.3275	0.18	0.2025	0.1175	0.43	0.475	0	8.44	8.7725	3.4775	0.9925	0.5025	0.27	0.3675	0.21	0.2825	0.3975	0.2975	0.25	0.4	0.4175	0.6175	0.03	0.5	8.215	4.3225	1.3975	0.6	0.395	0.645	0.03	0.12	0.14	0.215	0.195	0.075	0.2075
Solyc01g006340	18.9433	Expressed	4.41333	7.145	8.3625	7.71	11.53	11.9575	13.14	13.4	13.6775	13.445	13.1675	12.51	12.4	13.5825	12.9175	12.705	3.14333	8.565	6.0975	7.98	8.555	12.205	8.7725	12.0975	13.0675	13.4	14.755	10.95	13.585	12.8775	12.5775	15.45	10.09	3.37333	8.5125	10.0825	11.2725	13.4625	12.5725	11.205	8.765	9.135	10.895	9.8125	9.8925	9.9775	9.8025
Solyc01g006350	139.127	Expressed	30.2167	58.9975	62.825	69.575	119.98	108.235	114.978	127.968	93.1875	102.645	104.422	83.4675	73.3625	73.6225	56.9	62.175	60.2467	63.16	53.6225	115.392	99.415	105.963	84.8575	116.855	83.65	90.2625	89.3425	66.875	65.74	70.3075	56.75	82.725	48.5167	22.2667	57.2725	86.34	74.2475	65.5675	91.1075	70.6025	47.14	47.05	59.42	43.14	48.78	38.5675	40.775
Solyc01g006360	69.275	Expressed	0.206667	5.8675	7.4975	9.415	54.5175	62.2025	62.3725	69.275	54.245	57.4	59.3525	44.185	46.3225	41.125	24.5525	28.14	0.453333	10.5475	4.7875	60.355	57.7275	57.98	46.9375	66.45	50.465	48.2125	51.6	37.38	36.435	39.7375	31.6825	41.9	2.81667	1.32	5.57	41.185	39.495	33.14	49.8825	36.9225	23.2675	21.9125	30.7	20.875	25.015	20.28	21.25
Solyc01g006370	470.678	Expressed	21.64	111.34	147.21	111.935	280.035	251.463	264.425	291.45	126.925	140.808	144.26	88.1425	94.4975	86.99	67.78	68.91	25.05	158.148	128.985	470.678	309.303	237.79	211.43	284.865	93.0375	90.62	102.802	77.0625	67.515	74.5725	59.2525	67.7675	12.46	21.3967	128.52	283.457	181.325	112.615	149.97	127.94	43.8325	41.8625	60.7775	33.45	36.885	34.97	27.49
Solyc01g006380	2.7325	Expressed	0.04	0.25	0.1925	0.1025	0.1325	0.0325	0	0.0275	0	0.025	0	0.0225	0	0	0.03	0	0	0.5075	0.535	0.155	0.055	0.0875	0.125	0.135	0	0	0	0	0	0	0	0	0.03	0.0766667	0.595	0.27	0.0975	0	0.1225	0.045	0	0	0	0	0	0	0
Solyc01g006390	220.577	Expressed	16.14	33.7775	0.9125	0.0475	0.065	0.0325	0	0	0	0	0.03	0	0	0	0	0.06	16.78	42.0625	2.1175	0.135	0.0225	0.24	0.0275	0.025	0.035	0.0775	0	0.0225	0	0	0	0.0125	5.86333	17.1667	8.1825	0.4925	0.0975	0	0.0275	0.0325	0	0.0875	0	0	0	0	0
Solyc01g006400	3742.88	Expressed	107.59	2788.21	3138.91	96.48	7.56	3.8975	4.65	3.01	2.48	1.975	1.775	2.8725	1.6225	0.115	0.86	0.93	295.727	2117.84	3742.88	316.07	19.1025	7.85	7.3625	2.685	4.18	3.5475	1.4125	0.665	0.8425	0.315	0.74	0.2075	349.473	371.827	1392.95	65.52	4.845	0.6975	0.485	1.1925	0.1	1.1025	0.13	0.1075	0.035	0.095	0.0625
Solyc01g006410	3.5925	Expressed	0	0.14	0.0775	0	0	0	0	0.0275	0	0	0	0	0.0225	0	0	0	0	0.02	3.5925	0.0575	0	0	0	0	0	0	0	0	0	0	0	0	0	0	0.06	0.085	0	0	0	0.0225	0	0	0	0	0	0	0
Solyc01g006420	0.025		0	0	0	0	0	0	0	0	0	0	0	0	0	0	0	0	0	0	0	0	0	0	0	0	0	0	0	0	0	0	0	0	0	0	0	0	0	0	0	0	0	0	0	0	0	0	0
Solyc01g006430	3514.56	Expressed	104.447	516.737	488.887	261.538	305.243	411.548	403.127	402.295	349.652	342.85	358.402	289.79	319.62	187.875	276.082	351.228	246.597	527.795	701.383	370.413	630.587	737.938	1002.38	658.235	311.59	289.853	379.108	176.993	157.835	162.51	159.435	233.688	430.483	51.8	554.595	697.808	748.077	465.777	567.635	571.775	187.403	238.072	203.843	255.477	268.6	243.2	254.532
Solyc01g006440	2.515	Expressed	0	0	0	0	0	0.0225	0.0225	0	0.0275	0	0	0	0	0	0	0	0	0.0275	0.07	0.08	0.025	0.1175	0.0275	0	0	0	0	0	0	0	0.0275	0.0325	0	0	0.4275	0.3175	0.0325	0	0.0525	0.04	0.0225	0.025	0.115	0.0325	0.1225	0.12	0.02
Solyc01g006450	144.412	Expressed	23.6833	121.608	104.968	96.04	47.635	35.215	35.1275	41.7525	27.6825	31.87	33.83	25.705	29.895	32.0375	31.625	39.8975	26.6733	129.482	123.433	105.252	45.365	29.2125	28.5175	36.7125	23.43	28.525	27.1	33.6025	40.3325	36.8	32.935	42.81	8.97333	41.03	101.325	85.57	56.0925	29.0675	32.89	35.725	32.5275	33.9325	41.7825	33.25	41.2875	37.0225	32.86
Solyc01g006460	1.09667	Expressed	1.09667	0	0	0	0	0	0	0	0.0775	0	0.0275	0.0675	0.08	0.0225	0.03	0.07	0.03	0	0	0	0	0	0	0	0	0	0	0.065	0	0.0275	0	0.0475	0	0	0	0.0775	0	0	0.0275	0	0	0	0	0.0225	0.0325	0	0.02
Solyc01g006470	1.33	Expressed	0	0	0	0.0275	0	0	0	0	0	0	0	0	0	0	0	0	0	0	0.0725	0.0275	0	0	0	0	0	0	0	0	0	0	0	0.025	0	0	0.19	0.5725	0.0325	0	0	0	0	0	0	0	0	0	0
Solyc01g006480	14.5733	Expressed	9.50333	11.585	7.7025	9.155	8.27	9.9175	9.485	7.7425	10.96	11.57	11.3375	11.4925	9.995	9.9875	11.36	11.965	9.31333	11.68	9.375	9.3	9.0275	7.8275	8.78	7.37	10.3275	10.1125	7.595	10.3175	7.645	9.55	7.785	9.7525	3.65	8.41667	10.035	8.2175	8.6725	10.72	9.5475	9.3675	8.8575	7.0625	9.3775	9.87	10.4	9.46	10.1325
Solyc01g006490	26.455	Expressed	4.01	4.9725	7.81	8.8525	15.2325	16.3975	17.4925	16.5775	22.2025	21.63	24.3	18.0575	23.71	21.1325	20.8425	25.1675	4.54667	6.2925	8.13	13.5725	17.59	18.88	23.0325	16.77	21.395	23.485	20.385	22.71	18.7575	21.0975	19.335	23.6475	7.20333	3.66667	6.57	12.3925	14.8075	19.4225	23.1	16.045	11.91	13.7075	16.8775	17.185	19.5625	17.1	17.89
Solyc01g006500	10.9875	Expressed	1.58	6.33	6.745	7.2425	9.8	7.5675	8.8925	9.875	9.28	10.3975	10.9875	9.0225	9.54	8.82	9.0425	8.9925	2.71333	7.53	5.8225	7.7575	8.4475	8.05	6.6425	8.2375	7.3675	7.41	8.035	7.3925	7.235	8.165	6.535	6.77	0.69	0.4	6.3275	10.3325	9.0675	8.7525	10.1875	8.715	6.3625	7.0725	8.1975	7.4025	7.2125	6.7375	6.165
Solyc01g006510	223.433	Expressed	16.34	29.745	41.33	53.9375	75.165	80.98	86.5675	84.7025	94.5875	100.955	97.925	83.56	80.5525	79.1575	60.7175	52.265	20.1867	31.5675	41.1625	53.0375	55.555	72.3025	61.32	77.055	91.8275	87.39	95.1275	66.8425	57.485	72.2725	51.7925	46.4675	38.0967	6.21333	32.78	58.4325	64.04	74.5525	66.03	64.6725	33.1725	33.6775	39.025	43.955	39.9475	40.395	46.0825
Solyc01g006520	17.38	Expressed	1.36333	0.6575	1.8825	4.59	5.5275	4.82	5.3575	5.1375	3.245	3.9725	2.915	1.04	0.7375	0.94	0.475	0.2075	0.23	0.64	2.055	3.4075	3.775	3.1125	2.42	2.9275	1.7625	1.045	1.1325	0.3375	0.245	0.345	0.1525	0.1825	2.93667	0.826667	0.8175	2.46	1.3225	0.69	1.0025	0.6425	0.0475	0.215	0.1025	0.0975	0.095	0.075	0.0625
Solyc01g006530	0.226667		0	0	0	0	0	0	0	0	0.0275	0	0	0	0	0	0	0	0	0	0	0	0	0	0	0	0	0	0	0	0	0	0	0	0	0	0	0	0	0	0	0	0	0	0	0	0	0	0
Solyc01g006540	1124.82	Expressed	0.453333	6.7075	15.31	5.17	1.085	1.68	0.645	0.54	66.6925	66.745	40.845	735.528	661.572	710.52	947.115	1029.92	2.05	6.38	26.835	69.2725	4.255	4.6475	5.1075	2.4525	194.05	259.772	155.903	1124.82	970.915	772.673	819.077	850.135	0.183333	0	0.1875	1.4775	3.6275	77.12	103.073	59.875	250.678	230.757	261.837	106.445	109.035	97.6325	47.3775
Solyc01g006550	8.66333	Expressed	0	0	0	0.0275	0.64	2.5775	1.28	0.7525	8.1375	2.295	1.285	1.7025	0.9875	0.55	0.4425	0.7375	0	0	0.055	0.2325	0.6725	1.715	0.5275	0.4	2.5	1.2625	0.4625	1.3225	0.725	0.3375	0.45	0.6225	0	0	0	0	0	0.1125	0.0825	0.2275	0.0825	0.0975	0.025	0.02	0	0.0475	0.025
Solyc01g006560	8.25	Expressed	0	3.4625	4.525	0.7825	0.2975	0.1775	0.0325	0.15	0.05	0.0325	0.085	0.4425	0.7075	0.5725	1.1025	1.31	0	6.6925	8.25	0.745	0.1875	0.0625	0.1	0.03	0.0325	0.055	0.025	0.52	0.4325	0.37	0.205	0.31	0	0	0.165	0.055	0.0625	0.02	0.0975	0.0875	0.1075	0.465	0.1025	0.195	0.065	0.0225	0.105
Solyc01g006570	0.03		0	0	0	0.025	0	0	0	0	0	0	0.03	0	0	0	0	0	0	0	0	0	0	0	0	0	0	0	0	0	0	0	0	0	0	0	0	0	0	0	0	0	0	0	0	0	0	0	0
Solyc01g006580	1.0275	Expressed	0	0	0	0.0225	0	0	0	0	0	0.0325	0	0.0725	0.0725	0	0.17	0.08	0	0	0	0.05	0.1025	0	0	0	0.035	0.07	0	0.1075	0.035	0.0275	0.0275	0.025	0	0	0	0.1425	0.065	0	0	0.0275	0.03	0.055	0.05	0.0225	0.0625	0.0525	0.0225
Solyc01g006590	0.67		0	0	0	0	0	0	0	0	0	0	0	0	0	0	0	0	0	0	0	0	0	0	0	0	0	0	0	0	0	0	0	0	0	0	0	0	0	0	0	0	0	0.03	0	0	0	0	0
Solyc01g006600	89.47	Expressed	0	0	0	0	0.0275	0.1275	0.0475	0	0.0275	0	0	0	0	0	0	0	0	0	0	0.0525	0.8125	1.2425	0.0825	0.0625	0.025	0.025	0.1	0	0.1075	0.08	0.055	0.085	0	0	0	0.3425	2.1775	0.4875	0.9575	1.1125	0.18	0.3125	0.0775	0.075	0.095	0.1075	0.0225
Solyc01g006610	78.785	Expressed	0	0	0.025	0.1475	0.135	0.0325	0	0	0	0.0325	0	0.0725	0.05	0	0.17	0.11	0	0	0	1.9975	1.0325	0.8475	0	0.035	0.035	0.095	0	0.085	0.035	0.0275	0.055	0.025	0	0	0.1	12.695	4.99	0.2675	0.3325	0.9675	0.0575	0.085	0.0775	0	0.0625	0.0525	0.0225
Solyc01g006620	2.1375	Expressed	0	0	0	0	0	0	0	0	0	0	0	0.0475	0	0	0	0	0	0	0.0275	0	0	0	0	0	0	0	0	0	0	0.02	0.0225	0.0225	0	0	0	0.0275	0.065	0	0	0.0825	0.0225	0	0.055	0.02	0.07	0.0775	0
Solyc01g006630	102.007	Expressed	33.43	45.8275	42.665	25.4	22.0775	19.61	19.5925	20.435	19.5	20.44	22.1825	13.395	15.255	16.18	12.64	10.6725	66.2367	46.8125	36.7825	26.695	19.8275	19.7725	17.2875	21.3725	19.5325	19.0925	18.905	12.6875	12.1225	14.14	9.6825	11.565	52.8967	89.5133	29.875	26.04	20.6075	16.9725	17.7025	15.8425	6.545	6.215	7.7025	5.8175	5.6075	5.155	5.19
Solyc01g006640	0.04		0	0	0	0	0	0	0	0	0	0	0	0	0	0	0	0	0	0	0	0	0	0	0	0	0	0	0	0	0	0	0	0	0	0	0	0	0	0	0	0	0	0	0	0	0	0	0
Solyc01g006650	13.2225	Expressed	0	0.845	1.605	0.855	1.83	1.705	1.8725	1.8075	3.565	2.0975	2.2225	2.3275	2.2025	1.335	1.37	1.5275	0.0333333	0.685	0.66	1.1125	0.9225	1.7975	0.8975	1.205	1.2375	0.955	0.95	1.0825	0.835	0.87	0.71	0.665	0.336667	0.0333333	0.8475	1.6975	1.645	2.9775	2.3875	1.6825	2.2975	1.2875	1.65	1.325	0.9875	0.5075	0.705
Solyc01g006660	8.4975	Expressed	0.326667	0.4225	0.23	0.075	0	0	0	0	0.0275	0.0325	0.0525	0.0925	0.0225	0.09	0.0875	0.03	0.883333	0.6475	0.27	0.0775	0.115	0	0.0625	0.1175	0.0325	0.025	0.02	0.0625	0.1775	0.225	0.1475	0.0575	0.116667	0	0.23	0.0725	0.0325	0.0875	0.0775	0.17	0.0275	0	0.055	0.13	0	0.0275	0.1575
Solyc01g006670	14.805	Expressed	0	2.665	2.355	6.3925	6.1075	4.23	4.8625	6.5875	8.295	11.2025	10.1425	10.6425	9.7075	9.9325	9	12.69	0.03	2.025	1.8675	2.7025	2.925	3.3725	3.4875	3.625	7.42	7.4925	6.57	8.76	7.9275	7.8975	8.515	11.9775	0.0833333	0.106667	2.7075	2.5775	4.3625	6.0125	6.5525	6.0275	2.6825	2.5425	2.6675	3.7275	3.5875	3.56	3.34
Solyc01g006680	54.0525	Expressed	6.53667	23.415	42.3825	48.635	45.6125	28.545	31.755	38.3825	47.72	54.0525	49.1075	40.22	44.9975	39.5725	40.045	39.6375	5.13667	25.735	30.395	41.29	30.485	25.215	22.31	29.1275	37.055	38.315	37.535	48.2525	44.9675	43.395	38.695	37.205	10.4567	2.35333	32.7775	41.6875	32.6125	34.1975	32.7875	37.8875	24.905	28.395	27.3	38.385	34.96	28.2725	34.0925
Solyc01g006690	36.1033	Expressed	19.7	6.2225	5.7275	3.825	3.885	4.565	4.6925	6.15	8.415	11.84	15.1925	7.3225	9.73	10.585	6.62	1.945	10.2433	6.93	5.7625	2.5875	1.725	1.6825	1.7675	2.8075	4.44	3.68	5.305	4.56	3.235	4.8225	2.015	0.275	2.22333	5.02	6.97	2.7625	0.795	0.145	0.095	0.1475	0.05	0.09	0.0525	0.0425	0.13	0.0775	0.08
Solyc01g006700	53.5833	Expressed	20.34	34.99	30.8325	21.7325	29.225	29.7125	33.09	31.035	34.265	37.9175	36.2225	23.9125	25.1725	22.88	22.1675	27.695	32.7333	40.1225	30.285	35.165	26.76	26.505	21.9875	28.6875	25.835	26.0675	28.64	23.9925	23.015	22.8025	23.6825	31.62	26.01	34.63	29.5275	33.7875	27.5975	26.9525	31	26.3675	20.2	19.8225	22.8475	22.8075	25.595	21.2425	25.405
Solyc01g006710	59.4475	Expressed	12.8733	18.3225	17.0875	21.8575	34.2025	32.925	35.8275	37.5775	41.295	42.515	38.66	30.2725	29.2175	26.8525	28.6275	33.045	19.83	19.615	13.02	34.8225	30.625	31.125	22.815	34.005	33.2275	30.43	35.375	28.9875	28.6	30.2775	35.8225	42.5275	7.68	2.27333	13.1975	25.4475	19.33	21.2875	23.1275	19.36	17.31	18.895	22.5175	25.82	30.3025	21.8025	35.975
Solyc01g006720	16.3475	Expressed	9.21667	10.1875	6.4575	5.9225	3.8575	3.2575	3.8525	3.9325	1.235	1.0425	1.625	0.4325	0.355	0.52	0.275	0.1175	14.06	6.775	2.64	9.1925	4.6125	2.7	3.035	2.6625	1.1225	1.375	2.2425	0.525	0.585	0.81	0.285	0.08	0.163333	0	0.945	1.1125	0.78	0.8175	0.8675	0.505	0.0225	0.2675	0.0525	0	0.0325	0.0975	0.04
Solyc01g006730	1.895	Expressed	1.73667	1.715	1.895	1.755	1.3525	1.0375	0.895	0.8775	0.7875	0.4775	0.5975	0.23	0.225	0.1075	0.4175	0.1625	1.58333	1.3275	0.8525	0.865	0.595	0.6	0.49	0.4975	0.1225	0.2525	0.2625	0.1475	0.065	0.05	0.0775	0.0475	0.03	0.0333333	0.4875	0.4025	0.125	0.045	0.0475	0	0	0.065	0.05	0	0	0.0475	0
Solyc01g006740	13.53	Expressed	13.53	5.995	7.5575	7.3175	8.1725	5.74	7.3625	5.8575	6.0925	6.8975	7.01	3.28	3.665	2.52	2.4075	1.945	5.78333	7.19	5.7475	8.025	6.74	4.6425	3.9975	5.155	4.05	3.3425	3.2925	2.1225	1.78	1.5925	1.5425	1.1925	9.67333	4.83667	6.3875	5.9425	4.065	4.4175	3.8775	3.78	1.2325	1.1275	1.65	0.755	1.165	0.5525	0.5275
Solyc01g006750	0		0	0	0	0	0	0	0	0	0	0	0	0	0	0	0	0	0	0	0	0	0	0	0	0	0	0	0	0	0	0	0	0	0	0	0	0	0	0	0	0	0	0	0	0	0	0	0
Solyc01g006760	0.11		0	0	0	0	0	0	0	0	0	0	0	0	0	0	0	0	0	0	0	0	0	0	0	0	0	0	0	0	0	0.03	0	0	0	0	0.035	0.11	0	0	0	0	0	0	0	0	0	0	0
Solyc01g006770	24.735	Expressed	0	0	0	0.025	0	0	0	0	0	0	0	0	0	0	0	0	0	0	0.24	0.325	0	0	0	0	0	0	0	0	0	0	0	0	0	0	1.3375	5.6525	0.13	0	0	0	0	0	0	0	0	0	0
Solyc01g006780	0.645		0.0633333	0.1375	0.4175	0.645	0.29	0.1525	0.115	0.0925	0.0225	0.0575	0	0	0.0275	0	0	0.0225	0.0333333	0.1175	0.205	0.2075	0.045	0	0	0.065	0.1025	0	0	0	0	0	0.0225	0.0325	0	0	0.37	0.275	0.0325	0.025	0	0.0675	0	0	0	0	0	0	0
Solyc01g006790	22.9167	Expressed	1.15667	1.665	3.98	6.225	3.18	2.1925	2.385	2.2225	0.975	1.4075	1.5525	0.23	0.2675	0.15	0.1875	0.2925	2.28667	1.575	2.72	1.4675	1.305	0.985	1.56	1.485	0.3575	0.4325	0.2175	0.23	0.13	0.055	0.155	0.1125	0.983333	0.0433333	2.9375	2.025	1.4375	0.3175	0.52	0.6975	0	0.0275	0.0825	0.0425	0.035	0	0.185
Solyc01g006800	159.958	Expressed	58.5033	104.157	104.26	118.35	104.815	101.38	97.7075	100.82	93.875	94.3	89.795	69.7575	63.34	57.2425	56.2525	74.4575	75.5833	104.255	95.4075	89.045	95.7775	108.718	80.88	105.315	87.71	82.125	88.135	64.3275	60.48	58.555	64.9775	82.5675	53.27	21.1333	98.1125	103.703	85.175	73.0725	67.7125	71.5775	49.5375	46.7725	46.7125	55.095	46.9	47.575	61.955
Solyc01g006810	67.12	Expressed	7.69333	57.0525	67.12	45.6475	33.0975	27.3075	29.885	30.1575	20.8275	18.945	20.775	14.5575	16.285	16.475	14.5075	9.335	15.36	53.89	36.97	25.6675	26.3775	23.745	17.31	25.42	25.8775	23.4925	23.705	15.16	16.5575	15.7025	14.7625	9.6575	3.87667	3.01667	35.545	20.3525	16.2725	17.375	19.2175	17.8825	13.2925	14.6725	14.3425	10.4325	10.2625	11.4275	8.37
Solyc01g006820	0.47		0	0	0	0	0	0.065	0	0.095	0.0275	0.065	0.03	0.0925	0.0225	0.0225	0.0625	0.0275	0.03	0.0225	0.0475	0.185	0.1125	0.0625	0.0625	0.0325	0.0575	0.05	0	0.065	0.095	0.0675	0.095	0.1375	0.23	0	0	0.05	0.0325	0.0725	0.1775	0	0.0775	0.1475	0.025	0.0875	0.035	0.0225	0.0225
Solyc01g006830	263.902	Expressed	41.1333	187.08	263.902	216.31	141.498	125.017	131.26	126.655	106.157	98.985	102.295	88.5225	77.93	70.6625	66.8775	64.9175	51.6533	187.165	192.188	189.912	119.668	121.3	83.2625	121.715	110.097	89.0275	90.57	88.18	88.17	82.535	79.7175	84.8825	10.1	33.8633	170.28	143.657	78.7075	77.845	76.6625	80.5325	42.315	34.5625	39.2925	46.155	34.0875	34.98	45.01
Solyc01g006840	0.84		0	0.7225	0.84	0.3975	0.0325	0.055	0.0225	0	0	0.025	0.0825	0	0	0	0	0	0	0.4575	0.375	0.4025	0.0225	0	0	0	0.025	0	0	0	0	0	0	0	0	0	0.5125	0	0	0	0	0	0	0	0	0	0	0	0
Solyc01g006850	3.925	Expressed	0.626667	1.8825	2.0125	2.0775	3.925	3.285	3.2975	3.365	3.1375	3.845	2.66	1.505	1.8125	1.38	1.595	1.8125	2.37	2.525	1.9775	3.215	3.2075	2.4325	2.605	3.12	2.165	2.62	2.3675	1.605	1.0625	1.465	1.6475	1.935	0.313333	0.283333	1.6825	2.5075	2.03	2.2775	2.195	2.265	1.445	1.4225	1.515	1.1725	1.44	1.0525	1.19
Solyc01g006860	49.065	Expressed	10.2267	49.065	37.245	29.385	16.3675	13.695	15.4575	14.615	16.5325	18.4925	16.1325	13.67	12.3375	12.2675	12.6575	11.025	10.4833	39.6575	21.32	13.695	12.3775	11.1975	8.57	15.28	16.345	16.0775	17.83	11.6975	11.8325	12.425	13.64	14.675	3.61667	7.35333	22.325	10.875	7	7.4725	7.435	8.315	7.2175	7.17	6.54	6.23	5.895	6.505	8.2975
Solyc01g006870	104.927	Expressed	7.87333	16.5325	35.4725	41.1475	33.6575	29.3875	31.4225	33.6725	25.4375	25.035	25.6625	20.3025	19.72	19.0325	13.715	9.89	9.65	14.565	13.77	22.155	22.145	24.3775	21.45	24.5525	22.4225	21.0675	23.0975	13.0625	11.3675	13.4325	9.0025	8.605	13.56	2.28333	12.8075	16.3375	16.8225	19.34	19.5625	16.6375	6.375	6.48	6.9075	5.0275	4.3375	4.5425	3.8575
Solyc01g006880	72.3275	Expressed	14.8233	8.3	15.97	15.5475	36.835	35.3375	38.1225	48.1925	50.465	57.7225	57.0675	42.3025	52.22	48.125	36.175	51.0475	13.7567	11.59	12.575	49.795	42.9175	38.2425	27.8225	42.79	46.2975	50.285	57.925	50.06	51.84	55.6825	48.72	72.3275	39.3233	5.29	14.3475	36.0375	29.96	28.5775	36.13	24.575	32.3075	35.1675	46.5	51.7375	68.155	51.62	56.36
Solyc01g006890	131.283	Expressed	41.1467	23.7575	26.3425	17.8675	17.995	11.6675	13.5875	14.8225	6.8	6.3575	8.0425	4.96	4.4875	5.025	4.18	1.955	59.06	24.8575	24.3775	26.6325	16.905	9.76	8.745	12.2525	3.965	3.6875	3.3675	2.6075	1.38	2.2	1.795	1.235	14.16	14.06	15.3575	17.7875	11.9925	3.295	5.1025	4.32	1.0925	1.16	1.275	0.76	0.42	0.45	0.3875
Solyc01g006900	12118.1	Expressed	1712.99	1284.16	568.633	298.035	320.59	251.708	272.002	275.702	310.132	326	308.625	187.615	180.205	177.093	169.343	175.92	1550.17	1183.67	382.385	245.162	248.015	220.468	304.803	264.48	207.9	203.507	216.268	132.75	100.478	131.145	101.998	136.123	1279.93	3160.41	922.69	367.832	385.315	433.382	417.688	416.812	215.643	248.815	254.357	103.362	92.3275	94.565	95.745
Solyc01g006910	0.0225		0	0	0	0	0	0	0	0	0	0	0	0	0	0	0	0	0	0	0	0	0	0	0	0	0	0	0	0	0	0	0	0	0	0	0	0	0	0	0	0	0	0	0	0	0	0	0
Solyc01g006920	2.7025	Expressed	0.126667	0.5725	0.7925	1.0375	2.665	2.7025	2.595	2.4375	2.5575	2.5375	2.2	0.915	1.66	1.205	1.09	1.215	0.0333333	0.955	0.6525	2.265	1.8675	1.8025	1.715	1.9	2.3775	1.215	1.5275	1.19	0.94	0.7925	0.8575	1.6825	0.136667	0.23	0.8175	1.5975	1.645	1.735	1.5875	1.7775	0.715	0.875	1.12	0.7075	1.48	0.9025	0.7675
Solyc01g006930	105.3	Expressed	12.3367	16.2	22.6475	17.3025	30.195	34.1925	30.8075	33.3325	28.79	30.2625	27.53	27.13	22.65	20.6925	15.9075	14.755	4.05667	14.72	17.25	24.8975	23.875	23.7725	20.7125	21.4175	19.1525	18.0825	13.825	17.3875	12.4625	12.8275	10.8925	13.1425	2.71667	0.52	10.5525	12.8625	11.0875	9.2575	7.885	11.9075	4.045	3.6375	5.0625	3.4775	1.695	2.965	2.57
Solyc01g006940	176.36	Expressed	29.25	76.82	80.3775	71.845	62.9225	48.7425	49.3975	56.0575	40.2425	44.6	43.215	33.23	33.855	35.4175	28.1175	24.2275	40.24	81.7875	88.3	70.8975	51.74	45.5825	43.41	49.395	33.825	35.8175	34.645	30.1975	26.3225	31.6875	21.055	20.6875	48.4267	116.463	73.725	58.2825	50.185	33.28	27.3725	37.9325	11.815	11.9225	15.8725	8.74	6.9475	8.6975	7.5375
Solyc01g006950	27.035	Expressed	2.27667	0.305	0.4025	0.3675	0.4075	3.515	1.8425	0.6	17.135	2.9125	3.5525	7.0225	3.62	1.0475	1.55	1.665	0.37	0.1575	0.3225	0.1025	0.155	0.7875	0.245	0.1475	2.4125	0.5275	0.3175	3.27	1.2775	1.01	1.2225	0.6125	0.463333	3.63667	1.9975	1.1925	0.4525	1.1725	0.3475	0.235	2.8875	1.1	0.815	0.4925	0.4575	0.25	0.31
Solyc01g006960	56.0775	Expressed	8.73333	23.8625	27.5925	33.465	41.285	46.81	50.6025	51.225	50.21	53.5475	56.0775	40.965	42.1775	37.4725	30.485	33.55	10.15	26.715	23.6975	45.9025	43.385	42.4475	39.64	45.9425	38.66	38.5275	43.92	33.55	34.3575	33.91	27.8025	42.39	12.12	4.94333	25.325	39.6075	41.075	41.2	52.875	38.52	26.4675	24.5425	32.2675	29.57	32.615	26.1075	29.235
Solyc01g006970	73.285	Expressed	12.2933	27.8625	33.2575	28.0575	46.885	45.4225	50.195	52.845	57.925	63.07	62.125	48.9675	52.78	50.1575	40.28	52.8175	21.57	30.92	30.695	48.0375	50.495	44.805	47.51	50.235	47.7975	56.0225	50.71	44.4425	41.8275	42.17	39.19	51.08	12.6	8.11333	32.5525	57.545	49.4225	52.9025	63.4375	61.1	41.9725	42.5725	48.68	34.92	36.7275	35.4925	37.055
Solyc01g006980	226.97	Expressed	53.49	105.67	147.54	80.64	55.745	45.98	47.9025	48.04	37.2325	38.81	39.46	27.06	30.7675	28.705	27.84	22.31	45.0233	115.058	146.597	88.405	53.19	40.2625	37.2825	49.505	38.1725	37.3175	39.94	29.995	34.7025	30.635	34.2725	28.225	77.4967	112.477	127.07	80.06	52.265	31.11	35.6025	38.7075	21.145	24.275	29.05	18.595	19.1625	20.4925	17.6925
Solyc01g006990	72.5425	Expressed	18.0167	21.375	23.1875	24.03	30.4675	20.8825	23.23	23.1075	24.62	27.725	26.575	27.5275	26.985	26.91	24.4175	31.365	26.9233	21.6875	20.7125	30.675	24.485	23.215	25.2275	25.5075	27.785	27.865	26.595	27.98	29.9025	30.0775	32.0725	38.405	17.9667	13.31	20.7975	26.37	25.08	22.8825	26.0975	27.8175	23.5925	23.4825	22.7075	23.9575	21.605	25.62	25.53
Solyc01g007000	60.04	Expressed	0	0.76	0.605	0.025	0	2.325	0.3675	0.0525	2.4525	0.2075	0.0825	0.3625	0	0	0.03	0	0	0.7725	0.1475	0	0.0325	2.555	0.2575	0	0.7125	0.0525	0.095	0.1875	0	0	0	0	0	0.1	0.025	0.0225	0	0.2525	0.0225	0	0.1025	0	0.03	0.0225	0	0	0
Solyc01g007010	6.69	Expressed	0	0.7225	0.4575	0.025	0	0.845	0.1125	0	0.9625	0.24	0.055	0.595	0	0	0	0	0	0.52	0.0325	0.0275	0	0.15	0.0875	0	0.1625	0	0.0325	0	0	0	0	0	0	0.13	0.025	0	0	0.0225	0	0	0.1325	0	0	0	0.0675	0.0175	0
Solyc01g007020	12.4533	Expressed	0	0.325	0.2975	0.0275	0.0275	1.305	0.08	0.06	3.85	0.3	0.055	1.6775	0.115	0.065	0.03	0	0	0.1275	0.0575	0	0	0.6325	0.1025	0.03	0.34	0	0.0325	0.175	0	0	0	0	0	0.1	0.025	0	0.03	0.025	0.0225	0	0.265	0.0275	0	0.18	0.0275	0	0
Solyc01g007030	76.3167	Expressed	0	0.585	0.565	0.025	0.095	8.1925	1.2975	0.145	11.0525	1.12	0.245	2.6075	0.28	0.03	0.08	0.05	0	0.2275	0.025	0	0	3.54	0.6575	0.035	2.4975	0.21	0.13	0.76	0.0275	0.0275	0.03	0.0125	0	0.263333	0.1525	0.11	0.0325	2.615	0.35	0	2.0825	0.06	0.1225	0.385	0.165	0.04	0
Solyc01g007040	76.3167	Expressed	0	0.585	0.565	0.025	0.095	8.1925	1.2975	0.145	11.0525	1.12	0.245	2.6075	0.28	0.03	0.08	0.05	0	0.2275	0.025	0	0	3.54	0.6575	0.035	2.4975	0.21	0.13	0.76	0.0275	0.0275	0.03	0.0125	0	0.263333	0.1525	0.11	0.0325	2.615	0.35	0	2.0825	0.06	0.1225	0.385	0.165	0.04	0
Solyc01g007050	0.81		0	0	0	0	0	0	0	0	0.0675	0	0	0.025	0.0225	0	0	0	0	0	0	0.05	0	0	0	0	0	0.025	0	0	0.0575	0.0275	0	0	0	0	0.0875	0.79	0.5125	0	0.0825	0.125	0	0.0275	0.025	0	0	0.025	0
Solyc01g007060	19.6	Expressed	9.6	10.1425	7.2375	5.99	7.6525	7.0025	7.445	8.3325	8.5925	10.0775	10.6175	9.01	10.0325	9.5825	8.0525	8.89	19.6	8.4375	5.87	6.355	6.415	6.235	4.7975	5.8675	8.07	8.77	7.24	10.195	7.9975	8.4675	8.05	7.63	5.48	8.51	5.455	7.3025	6.8675	7.5225	7.9425	6.9275	5.39	6.1525	7.5925	7.975	9.1475	7.9075	8.0525
Solyc01g007070	1071.08	Expressed	11.6	73.94	180.265	222.648	408.735	414.192	424.882	412.957	317.165	325.332	348.655	338.178	397.805	383.392	353.957	382.36	9.57667	73.725	175.083	373.73	467.385	485.35	422.08	519.482	454.308	481.655	527.865	384.103	438.6	386.3	512.597	523.067	22.21	2.27	220.59	485.993	660.765	526.928	667.327	597.005	213.595	242.48	247.58	362.9	342.555	401.613	488.87
Solyc01g007080	0.145		0	0.075	0	0	0	0	0	0	0	0	0	0	0	0	0	0	0	0.0275	0.0325	0	0	0	0	0	0	0	0	0	0	0	0	0	0	0	0	0	0	0	0	0	0	0	0	0	0	0	0
Solyc01g007090	1.61	Expressed	0.766667	0	0	0	0	0	0	0	0	0	0.0275	0	0	0	0	0	0.466667	0	0	0	0	0	0	0	0.025	0.015	0.035	0	0	0	0	0	1.61	0.396667	0	0.0275	0	0	0	0	0	0	0	0	0	0	0
Solyc01g007100	31.2733	Expressed	7.23	12.7575	16.03	13.6825	14.615	17.29	18.8225	16.2475	13.05	12.9775	11.6125	7.275	8.6525	6.555	5.6125	9.435	9.64667	14.195	17.965	19.44	10.5	9.85	7.9375	11.395	6.8	6.965	9.83	8.275	10.5025	7.7625	9.7625	13.685	21.01	9.37667	18.3325	18.965	13.875	6.82	7.5675	7.1125	9.395	7.145	6.555	11.9875	12.7725	10.4425	9.87
Solyc01g007110	282.047	Expressed	40.5933	32.0175	48.175	55.705	73.25	161.613	108.58	84.135	146.665	102.125	86.565	118.425	124.59	97.785	118.567	126.87	51.5367	38.3875	51.755	39.96	68.265	125.828	94.3975	77.945	119.83	84.2625	88.6525	122.862	88.5125	113.38	91.7825	97.0425	52.4067	53.3367	45.0825	53.43	62.06	90.98	66.1175	46.6875	120.968	103.418	94.8375	95.6975	76.15	60.4425	62.3475
Solyc01g007120	32.0525	Expressed	9.59667	21.665	19.8275	21.69	25.34	24.425	26.5925	27.83	29.4225	28.145	30.42	18.3425	20.0225	20.9775	17.9025	25.79	17.4567	24.855	18.015	22.17	23.1175	20.4875	21.14	21.3275	18.3775	18.12	18.375	16.85	15.3175	17.6325	13.735	20.205	9.42333	3.17667	16.91	20.735	17.53	18.49	21.815	17.5375	15.7025	17.685	19.5725	15.7875	16.315	15.345	16.715
Solyc01g007130	42.8175	Expressed	8.67	6.8	13.2175	23.56	38.785	32.13	40.4	42.8175	16.335	20.6925	21.23	3.8775	4.6725	3.9125	3.2425	2.8775	6.46333	8.43	13.31	16.7475	29.2775	27.22	33.475	33.7625	8.6325	11.2325	11.19	3.065	2.7425	3.04	2.245	2.715	4.20667	0.813333	3.3725	3.625	7.2275	5.505	8.46	8.205	2.915	3.9775	4.7125	1.275	1.6	1.225	1.3025
Solyc01g007140	19.1933	Expressed	12.94	7.585	6.0275	6.2025	9.9825	8.3325	8.6875	9.8375	9.135	10.895	10.2925	5.1075	4.3975	4.5725	4.61	7.035	17.0667	9.4375	4.655	10.105	7.8725	7.4275	5.535	7.7025	7.7425	8.535	8.265	4.86	5.035	4.9625	5.0425	9.31	4.72667	6.76	5.1625	6.62	6.8	5.4525	6.8725	5.3	4.1825	4.985	5.89	4.2225	4.8175	3.795	4.105
Solyc01g007150	217.99	Expressed	26.9233	83.0525	125.54	95.5425	172.857	195.327	197.385	200.485	148.84	152.805	149.88	108.675	103.903	107.058	79.5475	90.2975	24.03	98.1675	120.843	217.99	195.575	170.21	142.305	182.178	135.65	137.157	137.623	85.265	87.875	85.14	86.0975	114.812	12.9233	20.17	96.5525	165.752	176.165	111.257	130.477	125.66	55.48	58.7975	62.5525	49.955	55.8525	50.83	51.6025
Solyc01g007160	10.405	Expressed	1.58333	10.405	4.0275	1.7775	1.3075	1.3625	1.8275	1.8525	0.92	1.345	1.6125	0.2525	0.13	0.2475	0.415	0.355	1.53667	10.2825	4.0425	2.4175	1.16	1.01	1	1.375	0.5025	0.7125	0.6	0.2775	0.1975	0.1975	0.2275	0.2725	0.5	3.79333	3.5325	2.0375	1.4575	0.7225	1.0175	0.845	0.18	0.24	0.535	0.16	0.1625	0.1275	0.145
Solyc01g007170	159.617	Expressed	0.173333	7.85	2.8625	1.09	1.32	2.8325	2.465	1.83	2.205	1.22	1.075	0.365	0.3475	0.16	0.2725	0.145	1.71333	9.3225	3.5625	1.7075	2.3025	2.5875	2.905	1.7375	1.03	0.3675	0.39	0.3025	0.12	0.025	0.075	0.0675	0.98	85.8933	3.9975	2.455	1.07	0.9025	0.8425	0.82	0.2	0.17	0.1675	0.1625	0.095	0.0225	0.02
Solyc01g007180	11.1625	Expressed	2.12	5.6075	2.235	6.7575	3.435	3.5225	3.9875	4.3675	5.0725	4.8675	4.2925	4.3925	3.08	3.8325	3.88	5.43	2.28333	5.31	2.96	3.0125	3.51	3.4675	2.9325	3.2925	2.8575	3.0375	2.915	3.6475	3.0725	3.1275	2.9925	4.065	0.93	1.09667	3.14	4.4225	3.7675	3.92	3.2625	3.48	4.0025	3.8375	3.4825	3.905	3.8025	3.0175	4.065
Solyc01g007190	28.1633	Expressed	10.29	0.5375	0.64	3.2075	2.0475	2.36	3.2925	1.4975	4.7225	5.41	3.1525	4.38	3.6	2.87	2.5975	4.59	4.82333	0.7175	0.9925	3.9425	1.7325	1.4325	2.0625	1.3	2.03	2.135	1.835	2.88	2.6925	2.85	1.6525	2.9	14.7533	0.223333	1.72	4.185	4.055	3.0475	3.74	3.1775	5.29	5.5475	5.755	2.605	1.975	1.6275	2.62
Solyc01g007200	158.363	Expressed	20.5333	3.7925	0.525	0.1475	0.2875	0.0675	0.2275	0.1375	0.1575	0.095	0.195	0.255	0.125	0.1675	0.1925	0.14	15.6033	5.97	1.7275	1.215	1.4625	0.685	0.8775	0.2875	0.6575	0.705	0.355	0.2575	0.39	0.2975	0.2375	0.1275	65.08	1.78	7.115	9.1225	6.0075	5.25	7.1025	5.76	4.5725	5.565	4.39	2.865	2.87	2.22	2.2
Solyc01g007210	7.3275	Expressed	0	0	0	0	0	0	0.0575	0	0.0225	0	0	0	0	0.03	0	0	0	0.11	0.025	0	0.05	0.1175	0.0925	0.035	0	0.04	0	0.0225	0.02	0.0275	0	0.025	0	0	0.1175	0.17	0.42	0.6775	0.4875	0.81	0.24	0.4775	0.15	0.215	0.28	0.2325	0.1725
Solyc01g007220	1056.88	Expressed	16.45	3.3375	25.5975	237.468	519.548	694.68	616.28	431.233	597.085	517.115	416.243	283.317	227.982	137.39	103.662	132.398	45.32	3.0875	38.9425	205.423	491.092	894.102	730.915	764.62	646.788	511.51	489.027	147.46	144.725	102.257	127.99	164.54	137.197	1.02667	87.225	481.678	736.46	959.433	877.938	1056.88	450.715	388.72	304.3	256.392	155.91	161.645	195.79
Solyc01g007230	28.0333	Expressed	8.41667	20.78	14.0225	16.2025	11.32	11.58	11.5975	9.9375	12.4	13.6475	12.635	11.3975	12.6025	10.8225	11.005	11.965	12.83	19.6725	13.385	8.6825	10.605	10.79	13.8825	10.1275	11.84	11.935	11.175	11.645	9.025	10.805	8.52	9.3975	5.31667	9.14	13.345	9.59	11.5575	12.1075	13.7825	11.6075	10.2175	10.525	10.1175	9.605	9.1225	9.8025	8.1025
Solyc01g007240	0.64		0.64	0.0425	0	0	0	0	0	0	0	0	0	0	0	0	0	0.0225	0.313333	0	0	0.0275	0	0	0	0	0	0	0	0	0	0	0	0	0.43	0.3	0	0	0	0	0	0	0	0	0	0	0	0	0
Solyc01g007250	25.25	Expressed	8.57667	20.84	13.96	18.1725	14.055	16.3225	16.8125	17.92	18.915	22.7725	24.5725	14.485	13.875	12.6725	13.8375	17.2225	6.63667	23.3075	13.565	18	12.4975	11.4575	12.2025	12.02	13.9625	14.26	13.2875	15.21	12.105	13.825	11.565	14.45	1.77667	4.92	11.3775	14.8525	12.0575	12.6725	12.0575	11.455	12.1825	13.615	14.865	13.275	14.1175	13.0475	13.015
Solyc01g007260	8.9	Expressed	2.12	1.23	0.7175	0.38	0.885	0.655	0.955	1.2725	0.625	0.5525	0.8525	0.23	0.355	0.385	0.3525	0.2775	0.17	1.045	0.6575	1.125	0.975	0.5725	1.065	1.0775	0.3975	0.7	0.935	0.4075	0.34	0.4225	0.105	0.3875	0.186667	0.0433333	0.4375	0.4525	0.32	0.155	0.4425	0.115	0.075	0	0	0	0	0.0175	0.0375
Solyc01g007270	0.325		0.03	0.195	0.1	0.0525	0	0	0	0	0	0	0	0	0	0	0	0	0	0.095	0	0.0275	0	0	0	0	0	0	0	0	0	0	0	0	0.03	0	0.025	0	0	0	0.0275	0.0325	0	0	0	0	0.0275	0	0
Solyc01g007280	58.1175	Expressed	0.04	4.2175	1.7675	2.8	0.945	0.975	0.9725	0.9575	0.7275	0.615	0.5975	0.5025	0.4675	0.1325	0.2325	1.18	0.06	8.74	1.625	0.84	0.705	0.4825	0.345	0.345	0.5475	0.335	0.6325	0.38	0.4025	0.2025	0.48	1.68	0.0233333	0.25	3.8525	0.9175	1.565	1.025	2.285	1.1075	0.5675	0.43	0.925	0.57	0.645	0.6175	0.6275
Solyc01g007290	23.725	Expressed	0	2.0475	0.415	1.05	0.56	0.5475	0.6675	0.91	0.535	0.5725	0.475	0.4175	0.365	0.2775	0.3175	0.495	0.153333	4.505	0.88	1.3025	0.685	0.18	0.4375	0.525	0.2575	0.4325	0.465	0.2175	0.23	0.145	0.2425	0.4325	0.116667	0.0333333	2.8525	1.1775	1.43	1.5325	3.1175	1.27	0.5975	0.3775	0.74	0.505	0.59	0.365	0.275
Solyc01g007300	53.6	Expressed	0	6.0425	1.6725	2.6675	1.4625	1.9775	1.4675	2	1.5625	1.34	1.19	1.0125	0.8325	0.5325	0.54	1.2125	0.123333	13.8675	2.4775	2.7225	1.7375	0.9425	1.1175	1.36	1.0475	1.3025	1.4675	0.7125	0.7725	0.3625	0.7275	1.8425	0.14	0.483333	6.4625	2.8975	3.8625	3.02	7.265	2.6975	1.1675	0.7075	1.265	0.9875	0.9825	0.8575	0.925
Solyc01g007310	49.0125	Expressed	0.0633333	5.3575	1.72	2.135	1.3975	1.805	1.185	1.545	1.3525	1.1825	0.955	0.8	0.88	0.5025	0.405	1.2275	0.0333333	13.03	2.55	2.6025	1.69	1.0625	1.1325	1.295	1.22	1.2475	1.305	0.795	0.8775	0.3475	0.6675	1.965	0.37	0.62	6.0025	2.7225	3.505	2.5325	6.4175	2.1575	0.8975	0.6025	1.07	0.7525	0.7925	0.6775	0.8825
Solyc01g007320	1580.39	Expressed	162.863	225.468	355.952	205.257	255.79	333.235	290.062	265.707	172.588	178.683	195.632	108.945	143.442	109.907	128.18	192.17	113.377	310.248	902.255	1034.47	466.99	184.433	261.61	172.595	85.4725	107.23	102.772	86.95	64.86	60.7475	55.4225	84.99	296.967	267.35	957.612	678.915	521.05	201.435	394.245	251.447	99.3625	121.403	129.257	132.817	108.95	131.85	115.89
Solyc01g007330	455.788	Expressed	2.21333	89.615	23.635	70.6575	12.4775	8.6925	8.1625	6.9475	8.1675	7.89	4.6475	5.225	5.6075	4.0975	6.825	27.605	0.53	161.105	24.5075	11.6825	8.76	6.7175	5.4925	6.7825	6.09	4.645	5.54	2.63	3.4375	2.5025	6.82	40.81	16.7267	55.77	69.5125	22.24	20.5325	11.19	16.3125	7.39	4.505	4.2125	5.3225	7.785	5.22	4.845	8.39
Solyc01g007340	75.06	Expressed	3.25667	3.63	1.2325	2.95	0.54	0.8975	0.63	0.8775	0.8925	1.1	0.7575	0.7425	0.63	0.58	0.7425	3.615	2.16333	6.8475	0.955	0.715	0.7925	0.9575	0.7425	0.69	0.7675	0.55	0.5325	0.3925	0.495	0.4575	0.8775	7.9375	2.72	0.356667	2.5875	1.2075	1.295	1.035	4.3825	1.69	1.055	0.925	1.1225	0.9175	0.865	0.755	1.23
Solyc01g007350	36.4575	Expressed	3.29333	3.3075	1.7225	2.9125	0.5175	0.8	0.76	1.055	0.69	1.0375	0.8975	0.565	0.625	0.3875	0.54	1.585	2.17333	5.9575	1.535	0.6625	0.5275	0.51	0.6125	0.4425	0.305	0.2825	0.3475	0.15	0.3125	0.3925	0.14	1.3925	0.74	0.29	3.3875	0.8825	0.68	0.65	2.0975	0.885	0.47	0.425	0.6975	0.535	0.3225	0.37	0.405
Solyc01g007360	29.9625	Expressed	0.07	3.0325	1.4275	2.615	0.6925	0.5875	0.6125	0.97	0.635	0.905	1.02	0.4775	0.4725	0.4775	0.51	1.2275	0.136667	5.2825	1.7475	0.88	0.6025	0.445	0.415	0.5075	0.12	0.1725	0.34	0.1075	0.3275	0.215	0.0625	1.0725	0.116667	0	2.945	0.74	0.81	0.4875	1.8025	0.74	0.4275	0.2875	0.4675	0.5025	0.3525	0.3575	0.2825
Solyc01g007370	46.0575	Expressed	0.393333	4.6575	1.395	4.0725	0.835	1.3625	0.7125	1.2	1.27	1.025	0.89	0.8875	0.7125	0.5575	0.685	1.76	0.0633333	8.61	1.4	1.3675	0.9675	0.5475	0.535	0.6225	0.325	0.415	0.6075	0.425	0.4875	0.17	0.3075	1.765	3.4	1.25	2.53	0.975	1.42	0.7825	2.39	0.83	0.5125	0.6725	0.9425	0.5025	0.5425	0.535	0.675
Solyc01g007380	41.965	Expressed	3.41333	4.865	1.225	3.67	0.895	1.1275	0.5025	0.8025	1.125	0.705	0.885	0.73	0.55	0.495	0.615	1.6175	0.736667	8.3375	1.09	0.78	0.6675	0.52	0.565	0.5675	0.4575	0.5775	0.615	0.4275	0.4875	0.1975	0.4375	1.8025	21.6767	5.22333	2.37	0.9575	1.1625	0.8475	2.155	0.8325	0.6725	0.8725	1.0975	0.555	0.49	0.535	0.72
Solyc01g007390	6.0475	Expressed	0	0.2425	0.0575	0.1025	0.06	0.1525	0.155	0.09	0.1075	0.0325	0.0575	0.0475	0.0225	0.03	0.0475	0.1375	0.0333333	0.2875	0.0275	0.0775	0.0325	0	0.1175	0.1825	0.0925	0.13	0.265	0.1075	0.02	0.025	0.05	0.425	0.2	0.13	0.2425	0.13	0.13	0.415	0.345	0.1775	0.215	0.1825	0.245	0.1725	0.165	0.0975	0.1875
Solyc01g007400	10.505	Expressed	0.07	1.795	1.305	1.865	1.59	1.37	1.005	1.8975	1.77	2.07	2.1225	1.66	0.9625	1.335	0.99	2.3275	0.183333	2.775	0.765	1.3175	0.92	0.5325	0.855	0.7	0.65	0.6425	0.6025	0.855	0.765	0.7575	0.6875	2.08	0.366667	0.07	2.4925	1.4025	1.525	1.8525	1.995	1.695	0.9625	1.38	1.2925	0.945	1.225	1.4225	1.295
Solyc01g007410	28.6625	Expressed	0.03	12.5225	9.6325	9.5275	8.925	6.515	6.46	8.3525	8.255	8.735	8.15	7.34	5.05	4.8525	4.875	9.8175	0.0933333	17.0125	7.76	5.7975	2.69	2.305	2.325	3.0075	3.0725	2.8625	2.5575	3.8525	3.8375	2.8	3.275	7.5125	0.14	0.45	12.95	7.86	6.005	5.585	6.435	5.645	4.48	5.7925	5.06	4.585	4.2225	4.325	5.5225
Solyc01g007420	29.385	Expressed	0.04	1.0325	0.69	2.4075	1.8275	1.1825	0.55	1.505	0.685	1.0625	0.8775	0.8175	0.445	0.505	0.6725	1.085	0.03	1.6	1.2625	1.31	0.6975	0.9975	1.1375	0.53	0.3475	0.4125	0.4125	0.6025	0.365	0.4	0.4225	1.13	0.1	0	3.0675	1.69	1.8025	1.385	2.38	1.7775	0.69	0.6925	0.9275	0.6775	0.9225	0.8425	0.735
Solyc01g007430	46.5275	Expressed	0	2.695	1.695	4.295	3.4775	2.4275	1.9575	3.1925	2.1425	2.35	1.895	1.9575	1.46	1.3475	1.7775	3.17	0.15	3.935	2.4475	3.2375	2.03	1.7125	2.67	1.68	0.7675	1.3225	1.07	1.205	1.1975	1.0625	0.9625	1.9675	0.0766667	0	6.2	3.655	3.6125	3.475	4.77	4.0725	2.0625	2.365	1.995	1.5725	2.0375	1.955	1.7975
Solyc01g007440	53.065	Expressed	0.156667	5.2875	2.1825	3.6375	2.4925	2.32	2.72	2.3725	2.265	2.3825	1.9775	1.8475	1.765	1.1475	1.7875	2.9775	0.213333	6.9575	2.6675	3.2875	2.3475	1.435	2.275	2.0425	0.78	1.555	1.065	1.0775	1.29	1.1875	0.955	1.615	0.126667	0.573333	5.4625	3.94	3.8725	3.2625	5.2525	3.9725	2.0925	2.2225	1.9825	1.26	1.3275	1.75	1.4175
Solyc01g007450	35.765	Expressed	0.156667	3.815	1.25	1.855	0.995	1.1675	1.2925	0.9625	0.965	1.1925	1.0325	0.825	0.8475	0.4975	0.79	0.9875	0.16	4.7875	1.4575	1.4025	1.16	0.69	0.9125	0.9375	0.4125	0.7175	0.5175	0.5375	0.5075	0.6575	0.445	0.7975	0.126667	0.53	2.9475	1.945	2.03	1.4425	2.9125	1.8775	0.7975	0.775	1.0825	0.3425	0.315	0.7375	0.5325
Solyc01g007460	21.445	Expressed	0.0633333	2.405	0.6925	0.995	0.6575	0.7275	0.6575	0.605	0.5325	0.6425	0.5925	0.46	0.585	0.41	0.43	0.7275	0.07	2.62	0.94	0.825	0.6225	0.2675	0.58	0.54	0.2225	0.375	0.3375	0.26	0.275	0.505	0.295	0.4275	0.27	0.56	1.4625	1.12	1.1325	0.985	1.665	1.035	0.5325	0.5275	0.565	0.2575	0.1275	0.38	0.4175
Solyc01g007470	52	Expressed	0	4.3575	1.14	2.725	1.26	0.7575	0.6025	1.0125	0.735	0.6175	0.5125	0.5675	0.3825	0.3675	0.39	0.695	0	6.5775	0.7875	1.5875	1.5175	0.4775	0.825	0.7375	0.7425	0.4325	0.5875	0.4325	0.205	0.425	0.245	1.025	0.0533333	0.51	2.7975	2.2525	2.335	1.4075	8.7775	2.545	0.8375	0.3575	0.835	0.58	0.435	0.39	0.42
Solyc01g007480	3.9825	Expressed	0.36	0.265	0.1675	0.295	0.06	0.0875	0.1025	0	0.055	0	0.14	0.0225	0.045	0	0.11	0.1375	0.183333	0.23	0.2925	0.2425	0.085	0	0.035	0.1275	0	0.05	0	0	0.07	0	0.09	0.33	0.316667	0.673333	0.4225	0.08	0.29	0.0225	0.1225	0.1775	0.03	0.0575	0.18	0	0.225	0.0825	0.0375
Solyc01g007490	336.433	Expressed	20.6233	25.955	19.28	25.2025	13.82	15.285	14.79	13.7475	10.3525	11.26	8.9125	7.5525	5.4675	5.1975	5.5475	9.7475	10.69	37.02	35.5275	26.355	17.695	9.575	12.3875	9.57	6.5775	6.2925	5.6575	5.2025	3.2575	3.8125	2.5075	8.2675	52.01	49.7467	35.56	22.2625	25.2025	17.525	51.2075	23.045	7.1625	7.5325	8.8675	5.625	4.8	5.84	5.8225
Solyc01g007500	243.293	Expressed	0.58	24.5025	11.0525	29.415	4.9325	2.9475	2.4425	2.25	1.95	2.3125	1.9	1.215	1.6375	1.16	2.2875	3.32	0.166667	48.855	13.5325	5.0725	3.5325	1.745	1.5625	2.17	1.2425	1.4825	1.2875	0.925	0.85	0.5325	0.945	2.1	3.18	17.8667	27.29	8.0175	6.705	3.77	5.77	2.815	1.5525	1.065	1.7575	1.3975	1.1675	0.6425	1.0875
Solyc01g007510	13.7025	Expressed	0	0.605	0.3675	0.4775	0.16	0.2575	0.155	0.125	0.355	0.28	0.1075	0.255	0.1475	0.21	0.22	0.4775	0.0633333	0.945	0.265	0.19	0.2775	0.18	0.1525	0.0875	0.435	0.2575	0.245	0.1725	0.185	0.0975	0.215	0.5075	0.0533333	1.08	1.51	0.415	0.5825	0.9325	1.6725	0.7275	0.22	0.2775	0.335	0.26	0.325	0.205	0.29
Solyc01g007520	30.8575	Expressed	0.03	4.0725	0.81	5.13	1.0325	0.7775	0.6575	0.785	0.48	0.77	0.5275	0.42	0.5325	0.4275	0.45	1.0975	0.123333	7.845	0.95	1.2225	0.6025	0.4575	0.185	0.3225	0.2525	0.21	0.4325	0.255	0.2275	0.215	0.2625	1.8525	0.03	0.113333	4.345	1.45	1.1625	1.1075	2.1075	0.875	0.2375	0.295	0.62	0.2575	0.465	0.225	0.3275
Solyc01g007530	53.0275	Expressed	0.0933333	4.3475	1.1625	6.8625	1.3775	1.08	1.145	0.9625	1.0775	1.2675	1.0425	1.085	1.0175	0.7975	0.6675	1.89	0.22	9.47	1	1.0925	0.64	0.7525	0.455	0.6125	0.4525	0.3575	0.525	0.4425	0.4475	0.2725	0.315	2.995	0.363333	0.33	5.8425	2.04	1.6575	1.4225	2.69	1.0875	0.42	0.56	1.0225	0.46	0.765	0.2525	0.49
Solyc01g007540	16.385	Expressed	0.113333	1.37	0.565	2.3325	0.3375	0.445	0.325	0.325	0.305	0.42	0.4025	0.595	0.3425	0.505	0.1925	0.5825	0.06	2.5925	0.4875	0.525	0.2675	0.3275	0.27	0.37	0.2625	0.2225	0.2675	0.215	0.305	0.165	0.0775	0.6525	0.13	0.2	1.6	0.765	0.4575	0.425	0.765	0.52	0.185	0.19	0.4875	0.105	0.22	0.11	0.165
Solyc01g007550	19.3325	Expressed	0	0.8725	0.26	0.5425	0.8225	0.72	0.61	0.83	0.335	0.76	0.4725	0.3	0.365	0.18	0.3875	0.4525	0.0933333	1.025	0.81	1.725	0.4025	0.385	0.39	0.305	0.105	0.115	0.1275	0.24	0.12	0.22	0.095	0.6225	0.0566667	0.116667	1.22	1.1525	1.0675	0.755	1.73	0.7125	0.3075	0.57	0.6775	0.32	0.285	0.7225	0.455
Solyc01g007560	73.1825	Expressed	0.383333	3.8725	1.5475	2.9275	1.225	1.33	1.3875	1.55	0.855	1.1425	0.87	0.705	0.6575	0.4325	0.705	1.1025	0.293333	7.37	2.6975	2.5425	0.865	0.8475	0.9625	0.6475	0.385	0.59	0.21	0.4975	0.33	0.64	0.3175	1.6275	3.32333	2.13	4.53	1.8675	2.4975	1.895	6.785	2.585	1.215	1.255	1.52	0.7725	0.7325	1.22	0.8125
Solyc01g007570	123.968	Expressed	0.383333	7.0625	2.355	4.9625	1.6125	1.685	2.0375	2.0925	1.5925	1.7775	1.275	1.1625	0.825	0.6425	1.0975	1.7925	0.39	12.8775	3.6775	3.02	1.1025	1.3575	1.345	1.1525	0.5175	0.8675	0.5	0.6275	0.705	0.7675	0.5575	2.2975	3.78333	2.65333	7.3425	2.8025	3.665	2.93	12.36	4.385	1.9625	1.975	2.4075	1.085	1.0475	1.705	1.315
Solyc01g007580	153.22	Expressed	0.343333	8.595	2.7575	6.79	1.17	1.445	2.0625	1.79	1.75	1.6575	1.075	0.98	0.615	0.8375	1.035	2.2	0.36	18.63	3.36	2.19	1.1775	1.2975	1.37	1.2625	0.4775	0.9975	0.445	0.4925	0.68	0.695	0.6275	2.445	3.96667	2.6	7.7225	2.2025	3.2775	2.8775	15.1275	5.0775	2.3925	1.5725	2.4175	0.91	0.895	1.3475	1.2475
Solyc01g007590	145.36	Expressed	0	8.635	2.3825	6.6175	1.115	1.23	1.6775	1.9375	1.6775	1.9625	0.8925	1.0025	0.59	0.8725	0.9025	2.115	0.13	18.11	1.825	2.09	1.1725	0.985	1.285	1.3	0.665	0.665	0.635	0.4975	0.745	0.485	0.53	2.3	0.726667	1.11	5.69	2.0175	2.3675	2.3275	13.1	4.5225	2.04	1.3525	2.07	0.87	0.6325	1.2525	1.025
Solyc01g007600	172.715	Expressed	0	12.4825	3.1275	8.8725	1.4725	1.8	1.7	1.9475	1.57	2.2375	1.1425	1.355	0.8475	1.155	1.01	2.2	0.03	26.14	2.6325	2.5975	1.6025	1.0475	1.435	1.295	1.0625	0.62	0.7525	0.7225	0.845	0.5725	0.5125	2.9725	0.24	0.793333	6.08	1.95	2.435	2.46	15.31	4.9275	2.575	1.5475	2.44	0.8825	0.6725	1.375	1.1275
Solyc01g007610	296.517	Expressed	3.79	36.5975	14.7325	23.945	7.33	8.395	8.18	6.025	4.56	5.7775	4.3675	4.6475	3.8475	2.7325	3.35	6.3625	1.99667	64.6475	22.5	16.14	6.95	4.1775	4.61	7.025	4.5725	3.2475	3.6475	3.175	3.5525	2.7175	2.56	9.09	10.8067	9.51	24.6125	10.625	7.1	5.0125	25.7725	10.72	5.6075	5.0225	6.0225	4.235	3.0125	4.4125	4.855
Solyc01g007620	119.645	Expressed	0.153333	14.915	5.375	8.3725	1.865	1.345	0.9975	1.115	1.3225	0.9375	1.0275	0.8875	0.9275	0.49	0.815	2.2925	0.0333333	27.9325	7.045	3.2875	1.715	1.3225	1.195	1.75	1.155	0.74	0.785	0.73	0.87	0.575	0.5275	3.105	0.356667	0.656667	7.8825	1.7775	1.82	1.455	8.57	3.8725	1.9	1.5975	1.3925	1.1075	1.08	1.055	1.0325
Solyc01g007630	365.887	Expressed	7.11333	50.22	30.2025	39.4575	28.0375	34.795	32.7675	26.7475	21.3875	20.75	19.31	14.9025	19.18	15.925	16.365	32.0575	4.57667	90.2525	59.83	91.03	64.255	19.9825	26.3925	20.8625	12.81	14.055	12.9	15.86	11.315	10.9025	10.835	29.645	25.5267	20.1533	65.12	54.4875	44.895	16.4675	62.2525	26.35	17.425	17.0225	20.65	24.74	17.4525	20.235	25.695
Solyc01g007640	485.695	Expressed	0.3	6.74	1.0925	4.475	0.895	1.175	1.0525	0.705	1.01	1.16	0.92	0.6875	0.845	0.6025	0.965	1.45	1.18667	15.445	1.2875	1.1675	0.6875	0.815	0.66	0.695	0.59	0.5075	0.8975	0.29	0.6325	0.3675	0.38	1.6925	1.01333	2.04	5.245	1.8325	3.3325	3.4	5.1875	1.62	1.635	1.475	3.0875	1.15	2.585	0.79	0.935
Solyc01g007650	67.775	Expressed	0.03	1.3525	0.1725	0.825	0.2175	0.205	0.17	0.14	0.16	0.1225	0.28	0.025	0.2475	0.1475	0.075	0.2625	0.193333	2.825	0.355	0.2125	0.1925	0.03	0.1275	0.345	0.095	0.04	0.0775	0.045	0.13	0.0775	0.1075	0.3475	0.23	0.0766667	0.5325	0.3075	0.4825	0.57	0.6575	0.1625	0.2075	0.2625	0.745	0.085	0.7225	0.18	0.1125
Solyc01g007660	39.0675	Expressed	0.546667	2.33	1.7325	3.9575	3.66	3.3625	3.32	4.5725	2.57	2.845	3.165	2.2225	2.255	1.8025	2.5375	3.88	0.663333	6.1275	1.92	8.725	4.4375	1.8	3.9675	2.92	1.345	1.53	1.285	1.16	1.34	1.4125	0.8225	3.4325	0.703333	3.47667	5.31	5.0875	4.29	2.955	5.92	3.3275	1.1375	1.3925	2.61	1.155	2.555	1.4475	1.5025
Solyc01g007670	24.1575	Expressed	0.166667	3.7525	5.78	3.85	4.9675	4.0425	3.5625	5.0225	2.905	2.9225	3.175	2.38	2.2075	1.9525	2.56	3.97	0.313333	5.4825	5.965	8.625	3.9225	2.5025	4.3575	3.57	2.355	2.0775	1.9975	2.0325	1.9775	1.935	1.54	3.9	0.37	0.683333	13.82	5.5025	3.6975	3.7825	4.745	5.245	1.97	1.4525	2.38	2	1.9975	2.5925	2.565
Solyc01g007680	30.8033	Expressed	0.346667	5	1.785	2.6125	0.6825	1.2	1.23	0.535	0.9475	0.5875	0.6125	0.4825	0.395	0.36	0.64	1.0375	0.226667	7.475	1.8125	0.72	0.405	0.5775	0.395	0.3225	0.315	0.2725	0.435	0.2775	0.2775	0.2275	0.37	2.68	1.31667	4.6	6.34	1.3525	4.3175	4.2875	4.285	1.3	1.3425	1.0975	1.3675	1.11	1.005	0.425	0.825
Solyc01g007690	82.8367	Expressed	0.0633333	45.7175	10.75	19.58	3.3925	4.3175	4.15	3.4825	3.155	3.42	2.3575	3.3325	3.765	2.2025	3.26	9.1875	0.0633333	79.415	9.675	6.3975	1.765	2.0925	1.2775	1.57	1.7025	2.15	1.765	1.8075	2.11	1.9925	3.2575	14.16	0.296667	5.74	41.495	14.14	12.805	7.375	6.4925	2.855	6.3625	3.97	4.2975	7.965	7.5975	2.84	9.855
Solyc01g007700	5.0075	Expressed	0.166667	0.145	0.03	0.075	0	0.0225	0.0225	0	0.05	0.0325	0.0275	0.0475	0.0225	0	0.03	0.06	0.46	0.275	0	0.105	0.0325	0.0325	0.0275	0	0.035	0	0.095	0	0	0	0.0225	0.1125	0.23	0.28	0.0725	0.03	0.1325	0.225	0.13	0.0275	0	0.1325	0.43	0.0225	0.4775	0	0.05
Solyc01g007710	461.083	Expressed	0.303333	105.567	29.3125	42.3625	7.6775	10.4875	11.165	8.865	8.99	9.9425	7.1925	7.7825	9.0325	5.9475	8.2575	32.0025	0.163333	204.673	28.6725	14.3475	4.74	4.3075	3.18	4.61	5.1075	5.995	4.7375	4.315	5.7125	4.92	8.565	56.6975	0.863333	40.3667	108.433	27.5725	34.8	21.55	19.4975	10.235	16.8875	9.4475	10.96	18.425	14.89	7.185	24.8425
Solyc01g007720	1123.41	Expressed	3.85	165.743	54.805	68.16	12.1475	20.2475	23.4025	13.935	18.3575	17.4575	12.765	12.765	16.49	9.9675	13.665	49.6875	2.34	351.44	56.84	21.96	7.9075	7.6625	6.155	8.3375	10.0725	11.0875	8.7175	7.57	9.6425	8.26	14.5225	84.0375	34.42	156.89	248.808	50.9775	77.5675	55.12	42.6875	22.5825	31.0675	19.1275	19.88	30.8325	23.4175	10.7925	39.63
Solyc01g007730	1.96	Expressed	0.113333	0	0	0	0	0	0.0225	0	0.0275	0	0	0	0	0	0	0	0.12	0	0	0	0	0	0	0	0	0	0	0	0.0325	0	0	0.025	0.23	0.233333	0	0	0	0	0	0	0	0	0	0	0	0	0
Solyc01g007740	97.05	Expressed	25.7967	52.5925	58.5925	73.6875	51.0975	48.615	50.265	53.41	57.0775	61.615	63.0825	47.185	51.81	53.9425	66.9825	93.9825	23.67	55.59	63.3825	70.2375	48.3525	35.2625	42.6825	34.8475	38.37	40.9475	37.4625	55.7525	48.11	59.95	52.4575	72.66	42.8233	14.9967	63.5975	49.27	50.4425	45.19	49.14	45.2175	47.5175	51.77	57.76	49.1125	60.05	49.5525	54.4075
Solyc01g007750	24.0867	Expressed	11.7467	11.8525	16.5	12.1275	13.2225	9.46	11.69	9.6225	5.2725	5.4975	4.86	6.1525	5.405	5.81	4.8125	6.4975	11.95	9.825	19.6775	13.525	10.4725	11.96	8.3825	12.6675	9.53	9.795	10.625	6.73	7.33	6.11	9.55	9.925	11.8533	12.2367	20.42	12.7125	10.9975	7.23	6.565	10.5525	8.8675	6.67	6.15	7.6475	7.0375	7.6825	10.96
Solyc01g007760	48.9475	Expressed	9.31333	26.395	20.235	18.865	20.225	20.12	22.0875	24.03	26.7225	25.095	24.245	27.065	29.1375	29.9975	31.5275	35.9775	17.56	26.6875	19.8075	21.9625	18.2325	15.6475	15.15	19.45	23.605	25.2425	23.505	30.5075	33.23	32.0875	29.135	37.78	3.18667	11.17	22.8975	23.0075	15.885	23.0025	22.815	20.125	42.2175	36.42	42.76	40.1425	43.3425	37.9225	39.91
Solyc01g007770	45.0967	Expressed	3.00333	13.87	8.7575	5.7775	3.1375	9.4425	7.49	3.37	12.6175	8.7475	5.0125	9.625	8.185	6.58	8.645	11.86	3.94667	9.625	4.6	1.7825	1.7375	5.5475	3.5325	2.5925	6.1025	4.3725	4.4775	9.42	8.9825	9.275	10.0025	9.74	3.41667	2.94	4.215	1.3	1.095	1.175	0.83	0.6575	1.3775	0.98	0.9875	1.7025	2.08	1.565	2.715
Solyc01g007780	144.59	Expressed	0.99	2.5	1.54	0.67	0.4125	2.1	1.42	0.175	1.385	0.5175	0.2975	2.125	0.935	0.335	0.265	0.75	18.1867	5.915	3.1075	1.315	1.11	2.26	1.6225	0.6625	1.7625	1.0125	0.71	1.9475	1.3225	0.5775	0.67	0.7175	1.61	1.41333	13.885	9.8425	5.815	2.02	2.8925	2.825	1.4175	1.23	0.53	0.475	0.46	0.5675	0.5625
Solyc01g007790	41.8433	Expressed	17.66	25.925	16.1275	17.8175	19.3575	15.4925	17.45	20.23	16.2075	20.445	16.3325	18.44	15.675	19.1225	17.37	25.1625	22.29	24.735	13.33	21.8825	14.4025	12.915	11.2	15.81	14.205	15.4225	15.0925	18.765	17.4425	19.36	19.355	30.515	12.9633	11.9133	14.81	16.695	13.7425	16.5875	18.48	17.155	13.0825	14.105	15.62	16.1325	16.915	15.63	19.665
Solyc01g007800	14.96	Expressed	9.08667	3.5	0.07	0.05	0	0	0	0	0	0	0.0225	0	0	0	0	0	0.226667	2.3675	0.275	0.0775	0.0475	0	0	0	0	0	0	0	0	0	0	0	0.0766667	2.82	0.2875	0.32	0.195	0	0	0.02	0	0	0	0	0	0	0
Solyc01g007810	7.3875	Expressed	1.48333	7.3875	0.52	0.025	0.065	0	0	0	0	0	0	0	0	0	0	0	0.136667	4.835	0.5725	0.13	0	0.03	0	0	0	0	0	0	0	0	0	0	0.0233333	0.146667	1.555	0.6575	0.2625	0	0	0.0325	0	0	0	0	0	0	0
Solyc01g007820	7.92	Expressed	2.03667	1.5425	1.1575	1.2625	1.7	0.9675	1.245	1.8925	1.3725	1.4825	1.4425	1.5175	1.2425	1.4825	1.125	1.0675	1.92333	2.58	1.275	2.37	2.26	1.19	1.065	1.9275	1.145	1.5075	1.2775	1.305	1.3525	1.6175	1.135	1.5475	0.793333	0.563333	2.8625	2.685	1.325	1.545	1.525	1.38	1.0675	1.2025	1.805	1.5725	1.49	1.2975	1.45
Solyc01g007830	1.275	Expressed	0	0.16	0.0575	0.0475	0.4875	0.2875	0.49	0.62	0.62	0.4775	0.665	0.395	0.5925	0.5825	0.27	0.4425	0	0.1175	0.0725	0.6725	0.485	0.325	0.2525	0.5	0.3125	0.2375	0.3825	0.41	0.3475	0.455	0.3825	0.4525	0	0	0.0775	0.6125	0.1925	0.4875	0.545	0.3825	0.42	0.47	0.46	0.475	0.2325	0.3875	0.62
Solyc01g007840	175.69	Expressed	36.26	7.51	9.395	13.58	10.0275	7.5925	7.52	8.34	9.175	11.24	12.39	9.725	11.5675	13.4125	15.7875	15.85	49.96	6.395	17.1625	16.005	9.735	8.18	13.2775	9.98	8.36	10.5125	9.47	11.315	12.5575	13.015	10.535	11.9125	153.467	37.38	20.475	15.6875	11.9925	13.485	12.16	11.86	12.2475	15.32	16.3	13.1225	17.615	15.2375	14.3125
Solyc01g007850	15.005	Expressed	0.163333	1.7725	2.28	2.885	8.0975	7.92	9.68	10.24	10.685	11.27	13.9025	9.7	11.585	12.5075	10.93	12.665	0.03	2.09	2.8725	8.515	6.13	8.025	6.69	7.5125	7.4825	8.74	7.7425	9.99	10.3275	11.97	9.9825	14.0925	0.07	0.583333	3.2275	7.2025	6.3175	8.275	10.5075	7.765	6.9475	7.8825	11.295	9.675	12.4675	9.8525	10.92
Solyc01g007860	1809.71	Expressed	571.353	190.968	188.965	294.43	233.975	182.428	202.975	200.385	215.498	230.463	249.077	161.555	171.593	166.59	162.035	132.11	503.997	189.798	235.778	237.07	232.352	179.528	231.38	194.09	156.54	140.752	169.35	126.502	117.92	141.312	105.14	102.953	678.21	492.59	168.855	165.455	153.558	193.26	177.16	171.4	147.262	143.542	132.575	203.74	175.502	177.798	190.985
Solyc01g007870	70.84	Expressed	1.59333	43.7325	19.92	2.48	1.17	0.8675	0.865	0.885	2.1175	1.335	0.65	1.61	1.6275	1.1275	0.89	0.3875	2.03667	26.64	4.515	1.1125	1.1725	0.8875	0.4025	0.2375	0.1275	0.2	0.125	1.58	1.5175	0.7925	0.525	0.1775	1.07333	1.09667	14.6375	8.38	6.525	0.7525	1.3675	1.6225	0.375	0.3675	0.055	0.055	0.225	0.11	0.0875
Solyc01g007880	27.96	Expressed	3.48	19.6	16.9775	19.6025	24.2525	20.28	23.8275	21.96	17.4875	20.5875	18.33	16.64	14.6325	13.1475	13.1275	19.445	9.94	19.46	16.9475	24.875	17.86	18.8025	13.6775	22.3675	17.465	16.71	17.0925	16.87	19.64	14.7375	19.74	27.96	2.87333	4.34	13.9175	17.7725	15.3975	14.78	15.47	14.9275	15.5075	11.9525	13.69	14.17	16.445	13.755	16.74
Solyc01g007890	104.785	Expressed	0.893333	8.945	6.115	1.805	1.875	1.6075	1.075	1.4575	0.625	0.4125	0.5075	0.345	0.4875	0.15	0.25	0.21	0.696667	15.2875	9.915	5.575	4.1225	4.1975	1.8975	2.34	1.2075	0.425	0.71	1.125	1.0975	1.1125	1.7125	1.34	0.333333	0.1	21.1075	19.47	4.4275	0.725	0.9125	0.72	0.135	0.19	0.145	0.065	0.1625	0.1975	0.1375
Solyc01g007900	46.47	Expressed	17.9333	32.415	25.9875	24.6875	24.7575	22.09	21.345	22.795	23.44	27.01	23.515	28.915	27.5175	27.5275	32.385	34.745	12.4233	32.5175	27.9325	24.1175	23.245	24.3225	21.8275	29.515	24.605	25.9075	29.4725	28.375	35.2025	28.9425	37.965	42.6025	10.6967	14.2033	21.475	12.47	15.09	13.15	12.3125	13.5275	23.59	23.475	23.1875	24.29	27.55	25.035	24.84
Solyc01g007910	236.107	Expressed	43.6033	99.985	106.92	72.81	60.2475	67.6425	68.265	59.455	84.11	77.8975	75.155	54.9075	53.2575	48.2075	45.0325	57.19	160.917	83.8475	100.468	78.1025	55.14	49.615	49.2575	56.87	64.99	53.9075	58.1525	41.185	41.0425	40.9625	40.955	48.06	115.827	172.243	52.5875	49.3225	43.1625	38.97	35.405	34.9475	36.865	37.3	34.385	35.62	37.9525	31.25	37.9825
Solyc01g007920	68.26	Expressed	17.69	12.62	17.285	40.26	48.2275	53.29	52.1075	47.63	55.5075	48.845	48.665	49.2475	50.61	52.86	47.465	59.3775	26.1167	10.78	18.67	27.1575	38.81	53.1525	49.165	48.7925	63.6575	55.0325	52.765	46.2025	45.1375	51.3425	44.62	56.9475	21.7367	4.26	18.8025	37.35	43.8375	55.205	47.37	52.885	40	34.6375	28.9025	53.375	42.1525	41.26	57.01
Solyc01g007930	122.107	Expressed	79.1	14.8725	10.25	11.7875	10.135	16.94	11.8975	10.2425	16.3275	13.7425	11.7125	13.11	9.9425	9.24	9.9775	14.945	122.107	18.9275	8.6525	9.45	9.9925	17.0125	14.655	9.585	12.3925	9.165	7.965	11.97	10.1375	9.39	11.205	13.4175	74.5133	24.0967	8.24	9.0675	7.095	10.52	7.1175	6.415	11.6675	7.7125	7.39	11.1875	8.9075	7.2975	10.89
Solyc01g007940	324.707	Expressed	0	0.02	0	0.4475	0.3875	0.3675	0.0925	0	0	0	0.0275	0	0	0	0.045	0.03	0	0.02	0.395	3.335	2.01	1.94	0.2625	0.055	0.0775	0.1525	0.075	0.0625	0.2625	0.275	0.1075	0.6625	0	0	1.59	50.15	8.595	0.99	2.3275	3.0875	1.4375	0.4425	0.6425	0.31	1.0725	0.675	0.45
Solyc01g007950	38.8633	Expressed	1.37	9.78	3.6175	1.83	4.135	3.4025	3.545	4.1125	2.6625	3.29	3.3475	1.4125	1.825	1.4925	1.4	1.35	5.82333	11.4325	3.26	1.835	3.3625	3.085	3.5875	4.6175	2.605	2.5675	2.7775	1.84	2.015	2.435	1.98	2.28	1.46667	2.74333	10.395	4.665	5.5925	5.5475	4.75	5.515	1.895	2.4625	2.36	2.515	3.08	2.8675	2.6475
Solyc01g007960	0.3875		0	0.0325	0	0.0475	0.11	0.2325	0.1	0.0875	0.2525	0.155	0.205	0.1625	0.075	0.0925	0	0.0575	0	0	0	0.025	0.0225	0.06	0.06	0	0.095	0.1125	0.045	0.0225	0.09	0.1375	0	0.025	0	0.0333333	0.125	0.11	0.03	0.02	0.0725	0	0	0.03	0.0275	0	0.035	0	0
Solyc01g007970	1.57	Expressed	0	0.3425	0.63	0.695	1.49	1.3125	0.9575	1.57	0.875	0.8475	0.945	0.5925	0.6075	0.315	0.1475	0.2025	0	0.235	0.2425	0.7425	0.51	0.505	0.465	0.6025	0.2175	0.34	0.5975	0.1525	0.065	0.21	0.21	0.1625	0	0	0.235	0.69	0.23	0.085	0.1725	0.22	0.1075	0.075	0.08	0.045	0.0675	0.06	0.0725
Solyc01g007980	39.9325	Expressed	14.5167	8.91	16.1475	22.7425	37.055	34.3175	33.82	37.225	39.9325	37.1875	31.98	16.8375	15.69	11.06	8.4825	5.885	15.1567	7.8	10.7925	19.77	20.0775	23.3625	14.035	20.48	14.39	9.82	17.0575	6.4225	5.275	5.9825	5.4475	5.7	0.573333	0.766667	8.4075	12.82	8.5925	6.485	6.265	7.2675	2.555	2.64	2.2575	2.49	2.6925	2.245	2.5275
Solyc01g007990	29.73	Expressed	5.82	9.47	12.895	12.8725	15.67	14.575	15.565	15.18	14.95	12.0525	11.38	12.395	11.15	8.8075	9.65	12.4075	7.71	10.4475	9.3425	10.87	9.2975	10.375	9.395	9.825	9.6325	8.39	8.43	9.09	10.21	8.7	9.8525	14.44	4.18	1.26	11.0175	12.47	8.66	7.8175	8.8125	7.51	8.2875	7.1875	6.23	7.8725	7.7575	6.1825	8.2825
Solyc01g008000	4281.23	Expressed	1482.03	427.188	492.168	880.755	1035.41	934.322	953.398	932.53	850.85	878.273	882.85	535.128	661.36	661.2	649.345	564.232	975.053	431.11	542.523	719.705	1267.71	1344.38	1831.36	1062.97	1004.03	785.105	834.492	536.242	524.872	580.092	443.405	450.493	1056.71	514.297	480.527	666.398	910.2	1060.6	954.67	1017.8	555.702	581.273	538.145	747.947	704.023	610.565	632.225
Solyc01g008010	147.137	Expressed	37.7433	29.9025	17.6275	14.3075	10.0325	8.895	9.8125	10.8775	8.805	9.3975	9.1825	8.045	6.4625	6.6175	4.7925	4.2175	26.4967	24.7775	12.505	8.98	7.025	7.7725	5.37	8.3925	6.99	8.3675	7.655	5.855	5.48	5.9375	3.46	3.785	47.14	11.0033	15.7725	12.725	8.7175	8.86	9.325	7.82	11.315	10.1975	7.875	7.075	7.725	5.015	5.8075
Solyc01g008020	61.3433	Expressed	8.4	28.0975	30.3075	10.54	5.025	1.9325	2.2	2.7675	0.51	0.4375	0.55	0.0475	0.1925	0.115	0.03	0.0425	7.11	29.9525	47.065	9.18	2.3275	1.11	1.04	0.99	0.095	0.165	0.3725	0.1075	0.0525	0.1925	0.08	0.1325	44.43	17.0133	37.255	17.7975	5.3075	1.33	1.215	2.0675	0.1225	0.11	0.1625	0.055	0.0625	0.0525	0.085
Solyc01g008030	0.37		0	0.185	0.18	0.0925	0	0	0	0	0	0	0	0	0.0225	0	0	0	0	0.1575	0.105	0.0275	0	0	0.065	0	0	0.04	0	0	0	0	0	0	0	0	0.0375	0.105	0.03	0.02	0.03	0	0	0	0	0.0225	0	0	0
Solyc01g008040	0.3075		0	0	0	0.0225	0	0.1175	0.09	0	0.245	0.08	0.0775	0.0225	0.0775	0	0.0225	0	0	0.0525	0	0	0	0.09	0.0275	0	0.2775	0.0675	0.095	0.0975	0.0375	0	0.0275	0	0	0	0	0.0275	0	0.045	0	0	0.1325	0.025	0.03	0.14	0.06	0.0175	0
Solyc01g008050	0.1725		0	0	0	0.095	0	0	0.0225	0	0	0	0	0	0	0	0	0	0	0	0	0.055	0	0	0	0	0.035	0.05	0	0	0	0	0	0	0	0	0	0	0	0	0	0.045	0	0	0.025	0.02	0	0	0
Solyc01g008060	125.797	Expressed	96.5567	81.87	63.64	60.84	46.8825	38.395	44.2675	42.4625	43.59	42.37	39.4	38.5275	41.7775	43.695	47.89	46.475	118.797	82.3175	51.3525	42.5575	37.5675	31.66	33.15	39.6125	37.3175	37.425	37.81	38.2075	41.5475	40.46	37.93	37.2425	123.363	33.5533	56.025	53.895	43.5125	36.2625	35.77	34.3025	34.05	30.02	36.2525	43.6175	41.005	39.855	36.9725
Solyc01g008070	464.97	Expressed	464.97	22.66	42.8975	60.005	70.8725	85.0725	84.74	77.5325	119.468	119.38	113.647	184.97	219.985	219.995	269.428	317.142	175.93	27.925	45.155	50.315	82.1125	82.5475	89.0225	88.37	133.93	137.787	149.49	226.817	259.515	242.85	247.685	279.985	158.397	422.04	43.47	57.8575	76.2	100.412	98.06	85.1625	160.803	169.475	146.942	252.86	249.708	230.99	253.162
Solyc01g008080	15703.1	Expressed	7638.86	1905.77	1143.8	2510.65	1099.65	943.625	920.505	867.695	777.688	788.335	823.023	372.608	405.868	405.595	388.83	266.2	4874.24	1798.86	1267.97	970.607	1482.91	905.895	1478.94	827.74	615.763	490.663	584.03	272.44	240.545	289.695	243.947	178.01	4222.91	15703.1	1103.81	894.143	760.62	623.077	563.638	659.067	307.062	339.355	278.355	306.255	310.152	267.983	297.815
Solyc01g008090	2582.69	Expressed	1028.79	1031.17	564.675	547.875	204.39	173.067	176.755	157.515	189.35	179.75	187.84	120.123	136.333	129.585	132.195	143.345	944.753	951.6	564.65	230.768	245.303	169.262	219.523	171.635	167.558	139.752	155.17	117.688	101.45	116.823	105.97	95.4125	872.063	2582.69	430.312	223.105	182.773	123.343	110.703	119.355	145.562	170.882	123.722	141.433	133.695	113.502	136.67
Solyc01g008100	55.29	Expressed	12.3633	44.64	37.3675	39.015	28.775	30.975	30.3925	34.4425	28.1925	29.8825	31.0525	15.915	11.245	13.0525	9.485	6.7475	26.7433	35.5725	37.155	29.1125	28.71	27.845	24.6075	28.6575	23.08	23.6975	23.4075	12.23	10.7775	9.9875	7.3625	5.72	37.1	35.0067	39.1	28.4025	25.0525	18.345	18.85	20.49	14.4075	15.175	17.1	8.0625	8.3025	7.3925	6.455
Solyc01g008110	3717.36	Expressed	325.007	1208.63	991.04	247.595	298.183	242.77	270.755	270.02	279.495	284.522	306.005	308.938	339.777	331.408	324.483	295.77	430.847	1071.13	661.885	320.558	283.058	238.645	239.067	257.022	310.805	317.043	326.22	360.09	366.86	358.125	331.512	326.363	527.687	1140.3	1148.69	396.267	302.592	225.02	261.062	234.825	230.105	251.583	229.958	280.988	273.31	274.652	285.685
Solyc01g008120	97.455	Expressed	21.7533	31.78	39.685	28.7075	71.29	85.7275	87.875	83.6975	87.1175	83.84	86.29	71.7825	80.62	68.9375	56.05	68.3225	24.58	32.7075	34	72.3425	77.7175	85.915	63.5625	90.76	78.39	81.815	79.535	65.0175	68.865	66.54	62.4775	77.565	34.34	11.3867	32.2425	60.945	60.1975	65.6	84.9375	62.4675	54.665	55.4125	70.2525	50.265	58.84	48.52	48.7725
Solyc01g008130	31.995	Expressed	3.81667	0.6275	2.7225	13.745	23.86	26.36	26.3525	26.2325	17.575	17.25	17.275	7.3525	6.2725	5.5525	5.48	3.97	4.97	2.11	2.7075	14.625	30.4	31.4075	31.995	30.64	10.375	9.1225	9.965	2.3975	2.1875	1.8725	1.3875	1.74	11.96	1.03333	3.3425	7.035	5.115	2.39	3.335	3.17	0.955	0.54	0.36	0.705	0.295	0.335	0.36
Solyc01g008140	153.317	Expressed	49.1467	8.1075	9.965	12.7	14.3625	13.0375	14.6625	15.18	17.4975	20.235	22.4375	19.935	18.58	18.9875	15.8225	17.99	35.0533	8.6075	13.105	17.59	15.905	11.0225	15.9825	14.135	17.755	20.99	24.0325	17.285	14.6825	16.1725	12.89	18.08	24.6	7.35	9.205	13.94	16.0425	14.195	19.8475	14.37	14.27	17.7575	17.315	13.7975	15.685	14.94	12.8275
Solyc01g008150	8.59	Expressed	8.59	0.09	0.095	0.29	0.0925	0.13	0.0475	0.0325	0.085	0.0325	0.0575	0	0.095	0	0.11	0.06	1.21333	0.0475	0.15	0.1575	0	0.03	0.03	0.03	0.0675	0.0575	0	0.0625	0.0525	0.0275	0.135	0.095	0.316667	0.0666667	0.1625	0.055	0.095	0.0625	0.025	0.0225	0.05	0.11	0.0275	0.075	0.0675	0.0225	0.1225
Solyc01g008160	78.0133	Expressed	8.72667	35.025	35.2275	28.825	30.11	18.995	20.4525	20.3	21.0075	22.36	24.16	36.16	38.93	38.7325	44.9075	37.5325	11.1067	32.915	40.1175	34.8775	22.0475	16.0125	19.8	17.645	25.56	31.33	26.5425	36.6175	41.1625	34.15	39.405	38.0925	10.4367	5.45667	31.6075	26.66	20.6075	15.9	15.0575	18.4425	33.4125	36.6325	36.7375	24.21	27.385	28.005	29.8925
Solyc01g008170	107.642	Expressed	54.4867	40.8625	44.795	37.3025	48.7	45.3175	46.6075	53.1825	45.7775	45.4975	46.9125	39.125	41.0375	39.9775	37.3925	36.2075	53.9667	46.605	42.065	43.2925	47.9225	46.9675	40.4175	49.63	44.03	46.8125	49.325	38.56	36.9375	38.515	32.9975	40.575	35.06	37.28	40.2175	50.165	51.265	42.0025	50.8225	44.845	30.2575	34.195	35.33	30.38	30.2625	31.2475	33.23
Solyc01g008180	77.935	Expressed	59.6033	27.9875	23.7725	12.455	18.9925	22.015	20.095	20.5875	16.74	14.02	13.225	10.5125	11.1025	9.3925	6.445	5.26	68.2	32.6375	26.7875	14.115	18.5075	21.6025	17.165	27.13	14.88	11.3125	14.985	8.3775	8.27	7.2025	6.9875	6.745	16.5633	9.67333	31.1475	24.4575	13.67	12.395	12.1825	11.2525	3.5575	3.2975	3.645	2.5875	3.0925	2.8925	3.1325
Solyc01g008190	8.7025	Expressed	0.04	4.2275	4.575	4.2325	4.935	4.4525	5.5675	3.8025	5.68	5.71	5.145	7.065	6.71	6.5225	6.0325	8.405	0.303333	4.34	5.0725	4.0175	5.2	5.79	5.57	5.74	6.65	7.515	6.54	7.6475	7.705	7.61	6.02	8.7025	0.0466667	0	5.0975	5.255	3.7275	5.625	4.0625	5.195	6.53	6.0725	5.8725	7.3925	7.0975	5.59	7.135
Solyc01g008200	14.33	Expressed	3.95	7.685	5.0425	6.9175	4.45	3.9325	5.13	4.5325	5.4875	6.0225	5.24	5.35	5.89	5.2525	5.9025	7.2575	8.91333	7.835	5.4225	4.9575	3.705	3.75	4.3275	4.5925	5.7925	4.945	6.0375	6.6775	6.4775	6.2175	4.545	6.9075	10.8733	1.40667	5.7575	6.6	4.275	4.7225	4.8625	3.5975	5.49	4.905	5.7475	6.505	6.1575	5.4325	6.4975
Solyc01g008210	23.3567	Expressed	0.713333	5.4775	8.7475	6.435	3.3125	5.615	2.905	2.495	2.385	1.2625	1.1325	1.46	0.8075	0.465	0.2325	0.1425	3.71333	4.445	7.125	4.7825	3.1325	3.675	1.4925	2.5075	1	0.4875	1.0325	0.2775	0.2425	0.175	0.1825	0.19	3.37	7.86667	3.905	2.155	1.495	1.8125	1.335	1.1775	0.36	0.3525	0.27	0.2675	0.135	0.18	0.1425
Solyc01g008220	5.0925	Expressed	0	2.4575	3.4125	2.825	3.21	4.845	2.7	2.3625	1.93	1.265	0.8925	1.3175	0.55	0.3375	0.205	0.1375	0	1.5925	2.955	5.0925	2.7475	2.9025	1.2725	1.815	0.8025	0.37	0.69	0.1475	0.1725	0.1275	0.295	0.165	0	0.1	1.7575	1.87	1.395	1.415	1.335	0.7625	0.3225	0.13	0.1625	0.375	0.1275	0.0425	0.1275
Solyc01g008230	213.5	Expressed	58.33	65.3325	73.295	77.765	89.945	81.62	86.12	90.53	68.6475	84.04	85.4125	41.6175	43.8825	43.27	54.175	80.14	47.95	70.37	80.725	107.27	86.94	76.975	130.438	86.74	45.3825	48.7875	46.955	39.07	38.8675	42.2175	41.9225	59.01	41.4233	44.7233	59.35	69.7875	89.2125	107.24	95.215	100.83	64.035	61.395	67.315	64.6675	80.005	60.365	73.51
Solyc01g008240	1.29333	Expressed	0	0.0675	0.1	0.0475	0.0525	0	0	0	0	0	0	0	0	0	0	0	0	0.145	0.0325	0.0275	0	0	0.0275	0	0	0	0	0	0	0	0	0	1.29333	0	0.025	0.03	0	0	0	0	0	0	0	0	0	0	0
Solyc01g008250	70.65	Expressed	14.9133	15.8925	19.54	24.265	12.855	8.095	9.87	10.31	9.785	9.7575	10.445	7.3675	9.4775	7.4475	10.3	12.82	11.2933	17.1375	24.69	16.065	10.205	6.545	9.015	8.5525	5.4775	5.9075	6.4325	6.675	6.595	8.355	7.085	9.4775	31.0467	15.15	25.43	16.45	12.46	12.205	11.42	9.6325	11.375	11.4075	13.5175	12.895	15.3	11.965	12.555
Solyc01g008260	173.357	Expressed	61.2533	11.7675	9.735	13.305	15.1675	13.055	13.285	13.8125	13.6175	13.29	12.4525	10.49	11.0925	9.7	10.5675	11.2625	173.357	10.745	8.205	9.2075	12.2225	16.725	15.245	17.845	17.0325	14.8325	16.34	6.9275	7.2275	8.53	8.365	9.6825	66.0833	58.8133	10.4825	10.3875	13.6575	21.6675	17.16	19.515	12.3875	14.04	11.54	9.905	8.045	7.9775	10.41
Solyc01g008270	122.47	Expressed	28.8933	91.2075	101.415	80.2925	80.9375	94.82	94.0075	94.115	86.385	87.93	93.1175	63.525	71.9175	71.2675	68.0175	77.2775	33.14	99.3575	113.487	91.87	105.46	100.338	105.707	107.475	89.25	96.43	100.427	52.9225	52.335	53.0425	56.17	77.3175	34.7133	35.3467	98.0525	92.3	94.6975	87.7975	83.6275	90.435	61.63	63.155	65.695	50.745	45.7475	50.79	57.89
Solyc01g008280	77.2775	Expressed	6.01	19.54	45.7525	40.5725	52.485	57.605	59.855	59.2325	55.4425	56.1975	64.6875	42.455	47.9325	49.2525	45.9875	53.57	13.2333	22.1575	56.25	52.64	67.5025	65.115	66.37	73.78	63.3775	70.5975	77.2775	36.365	36.79	37.395	38.92	57.1375	16.04	8.03	39.1075	42.4525	56.5725	50.135	49.14	53.26	38.045	42.2875	43.1075	27.69	27.81	30.225	34.52
Solyc01g008290	22.0967	Expressed	22.0967	15.1875	12.8425	9.2225	7.76	10.08	9.135	9.5375	8.6	8.835	7.0475	4.655	4.7125	4.07	4.52	7.57	18.5167	16.59	13.73	11.1325	7.94	8.335	6.6725	7.285	4.87	3.8975	4.67	3.3375	3.35	2.575	3.1175	6.1325	9.22667	11.1133	13.035	12.2025	10.8225	8.7625	9.425	9.4	4.75	4.7625	5.735	3.6775	2.9275	2.0425	3.245
Solyc01g008300	6.56	Expressed	2.08	0.7475	1.095	2.69	4.2875	3.4175	3.3175	4.205	4.7475	5.015	6.56	3.6125	3.5275	3.55	2.22	1.425	4.19	0.78	1.005	2.34	2.915	2.6675	3.7575	3.4825	3.7125	4.45	2.7975	1.9225	1.7025	2.27	1.0975	1.2775	2.04333	0.796667	1.5925	2.255	2.105	2.09	2.04	2.21	1.5525	1.58	1.4475	0.8925	1.2175	1.5225	1.0925
Solyc01g008310	129.275	Expressed	61.2967	93.225	80.83	81.3375	103.627	101.067	109.22	118.565	117.105	129.275	126.835	99.6175	94.4625	89.7975	78.865	94.0975	55.4067	92.0875	76.045	115.265	94.255	94.03	81.075	97.615	98.7975	98.125	95.8775	79.6075	82.395	83.725	75.37	100.915	57.7233	55.6333	67.0775	101.01	85.5975	86.9125	97.89	85.3175	79.9225	82.775	89.87	85.5225	93.5725	75.7125	81.92
Solyc01g008320	207.975	Expressed	5.74	21.16	30.1	35.1725	67.8425	61.6075	69.9925	72.21	93.49	94.8175	91.3025	115.448	123.585	120.267	95.4475	138.255	5.46333	26.0325	24.6975	57.9925	67.35	66.635	53.615	77.205	103.28	108.085	108.498	109.755	131.72	118.375	123.692	189.75	2.81	1.97333	34.4875	66.6175	69.425	97.315	117.385	98.285	96.5225	102.177	110.043	144.73	157.575	143.365	169.19
Solyc01g008330	289.553	Expressed	14.6833	197.778	289.553	144.205	116.245	93.65	104.528	105.505	75.9725	81.9275	79.8775	70.31	85.76	85.6725	83.4725	98.0025	23.8867	226.64	230.055	159.833	104.397	63.1175	69.5475	79.8075	59.9475	62.49	68.8	68.2625	82.8875	84.15	78.425	93.2575	22.6133	66.7567	178.602	177.5	109.69	59.5475	63.745	63.55	36.925	40.4525	44.7825	50.4575	54.4425	47.2625	51.88
Solyc01g008340	20.965	Expressed	10.6767	16.8725	12.145	12.52	12.725	13.9025	12.365	12.86	15.275	15.07	17.0025	12.025	12.5875	12.04	11.55	15.3475	9.70667	17.44	12.69	15.075	12.45	11.46	10.295	10.6	11.795	11.4175	11.1475	11.7425	11.585	12.5875	11.89	13.9625	6.01	7.53667	12.1325	12.2825	10.32	11.915	12.4125	10.6725	8.05	7.575	9.0025	7.37	8.445	6.9675	8.3375
Solyc01g008350	131.79	Expressed	96.3367	92.78	61.81	54.3125	38.1125	37.745	42.205	37.9175	48.205	46.715	45.275	50.8225	39.4775	41.3425	46.4375	52.27	95.49	80.495	53.5525	28.9825	36.375	40.065	34.3375	43.8675	54.89	56.4625	51.8075	50.725	45.745	52.7425	60.7325	53.86	54.64	56.42	63.4	42.045	44.625	49.07	39.4425	46.03	62.75	59.0625	57.455	57.375	58.0325	51.125	69.72
Solyc01g008360	130.995	Expressed	94.41	92.0475	60.4925	53.2175	37.5225	36.9875	41.1525	36.735	47.3675	45.995	44.195	50.4325	38.8425	40.8325	45.775	51.9425	94.6667	80.01	52.1675	26.6675	35.2225	39.19	33.495	42.5925	54.315	55.6225	51.1875	50.255	45.3925	52.4875	60.2925	53.215	54.32	56.07	62.6775	40.91	43.7225	48.3225	38.9025	45.16	62.5425	58.645	57.1325	56.9025	57.7525	50.865	69.1925
Solyc01g008370	307.408	Expressed	109.153	148.583	118.578	145.745	105.14	106.782	104.823	114.162	122.507	125.787	126.715	141.245	139.963	133.452	146.79	146.572	145.337	157.05	144.7	140.97	126.552	107.255	110.295	109.153	114.805	121.76	112.618	126.495	129.4	125.728	139.958	144.023	110.15	199.683	134.97	152.005	132.48	110.515	117.623	108.522	157.162	150.995	146.705	179.083	173.938	156.118	159.865
Solyc01g008380	1.4475	Expressed	0	0.8075	0.855	1.0875	1.4475	1.015	1.4425	1.1025	1.085	0.895	1.02	0.4825	0.315	0.6725	0.425	0.565	0.0666667	0.8575	0.5775	0.9425	0.8725	0.965	1.0425	0.9925	0.825	0.635	0.835	0.4875	0.4575	0.415	0.4625	0.7325	0	0.0433333	1.155	0.8625	0.68	0.925	1.065	1.0025	0.5475	0.48	0.73	0.61	0.3375	0.4175	0.37
Solyc01g008390	0.04		0	0	0	0	0	0	0	0	0	0	0	0	0	0	0	0	0	0	0	0	0	0	0	0	0	0	0	0	0	0	0	0	0	0	0	0	0	0	0	0	0	0	0	0	0	0	0
Solyc01g008400	8.40667	Expressed	5.29667	0.4025	0.2375	0.5775	0.395	0.3475	0.31	0.535	0.31	0.35	0.2775	0.11	0.2	0.25	0.085	0.265	8.40667	0.315	0.095	0.3625	0.21	0.39	0.2075	0.155	0.18	0.215	0.15	0.1875	0.0675	0.1075	0.1875	0.2325	0.91	2.28667	0.33	0.3	0.2875	0.2025	0.3975	0.13	0.0875	0.175	0.21	0.225	0.3525	0.1125	0.225
Solyc01g008410	0.673333		0.193333	0	0	0	0	0	0	0	0	0	0	0	0	0	0	0	0.486667	0	0	0	0	0	0	0	0	0	0	0	0	0	0	0	0	0.0333333	0	0.0275	0	0	0	0	0	0	0	0	0	0	0
Solyc01g008420	14.6175	Expressed	0.04	1.7875	5.9275	12.6175	13.7975	8.305	9.7025	13.37	2.7975	4.7375	4.67	2.0775	1.895	2.7475	1.0325	0.9625	0.97	1.26	5.915	10.47	14.6175	8.855	8.75	8.145	2.0275	1.6875	1.685	0.88	0.665	1.1225	0.42	0.545	0.0233333	0	0.715	1.275	1.14	0.37	0.5175	0.6475	0.0525	0.165	0.0775	0.31	0.17	0.07	0.06
Solyc01g008430	11.2175	Expressed	0	0	0.0225	0.0225	0	0	0	0	0	0	0	0	0	0	0	0	0	0.16	0.1675	0.1325	0	0	0	0	0	0	0	0	0	0	0	0	0	0	1.5575	1.0775	0.03	0	0	0	0	0	0	0	0	0	0
Solyc01g008440	25.21	Expressed	11.8733	6.1175	4.785	8.5225	11.13	11.6075	12.4525	12.56	12.3475	12.865	12.2675	9.7175	8.87	6.765	9.0725	15.2425	7.40667	5.7025	4.15	9.72	8.9675	10.055	7.6775	11.615	12.235	13.1225	12.955	13.52	12.6525	11.985	11.8325	17.92	5.50333	1.15	3.765	8.24	7.855	8.4925	8.345	8.3025	16.565	16.865	13.7475	18.7575	17.7275	16.3325	17.2325
Solyc01g008450	0.48		0	0.0225	0	0	0.0325	0	0.0325	0.1175	0	0	0.0225	0.0225	0.0225	0	0	0	0	0.02	0.025	0.0275	0.18	0	0	0.055	0	0	0	0	0	0	0	0	0	0	0.025	0.0775	0.0325	0.065	0	0.0525	0	0	0	0	0	0	0
Solyc01g008460	37.5933	Expressed	21.2033	12.6625	10.32	11.3775	13.7375	12.33	12.9	12.945	15.335	15.415	14.5375	13.73	9.4275	10.9875	12.415	14.4775	15.6533	13.26	10.55	10.655	9.69	11.435	8.805	11.7925	15.4675	14.7125	14.615	10.54	10.72	10.0425	12.54	15.5125	33.56	19.2367	10	10.23	10.37	10.495	9.565	10.6075	12.155	11.8375	9.45	8.4	8.7175	10.08	11.205
Solyc01g008470	52.0567	Expressed	19.3033	16.9775	13.8175	10.3425	8.8825	8.1475	8.835	9.4475	7.2025	8.35	9.755	5.9925	5.7975	5.695	5.095	4.31	13.19	18.035	12.7425	11.315	8.45	6.75	7.865	8.44	7.2175	6.4375	5.345	5.0825	4.255	4.79	3.27	3.34	36.2833	17.68	10.93	11.94	7.7275	9.5025	9.3125	9.09	6.315	5.8475	6.5025	3.925	3.8825	3.92	3.6025
Solyc01g008480	18.0675	Expressed	0.326667	3.1775	3.6275	5.2875	13.1	12.1325	13.6925	14.9225	14.2875	16.2825	15.98	11.8875	11.7225	11.0925	9.7325	12.36	0.466667	3.9575	2.6075	10.73	10.1725	11.7375	7.4875	11.9825	10.365	10.975	10.5	10.005	11.1325	9.985	9.1475	13.9625	0.333333	0	3.5375	10.3225	8.8375	12.1175	13.14	10.4825	9.06	9.56	11.47	9.775	9.9675	8.81	9.535
Solyc01g008490	33.3767	Expressed	5.04667	7.4425	9.3325	9.35	14.2575	15.4875	16.8425	16.005	19.645	19.55	17.225	20.93	23.4425	22.5825	23.2725	27.8	9.38667	9.24	7.73	9.835	16.5275	16.17	16.465	17.5675	21.7525	23.58	22.6375	20.33	22.79	21.4475	22.565	26.57	9.22	1.79	11.195	16.4225	21.3825	26.4075	24.295	22.125	21.1525	23.49	19.47	25.8525	23.4675	24.1075	23.3575
Solyc01g008500	1.2075	Expressed	0.123333	0.205	0.32	0.35	0.79	0.7625	0.65	0.6925	1.2075	0.66	0.6975	0.455	0.34	0.23	0.1875	0.1675	0	0.335	0.055	0.445	0.4625	0.335	0.3325	0.3525	0.3125	0.535	0.285	0.1975	0.3425	0.055	0.16	0.3375	0.0466667	0.106667	0.26	0.405	0.1275	0.1525	0.29	0.195	0.05	0.1075	0.2625	0.0525	0.035	0.065	0.0225
Solyc01g008510	27.86	Expressed	0.163333	0.0775	0.0525	0.125	0.1875	0.22	0.3625	0.24	5.7025	4.9	4.395	23.7625	23.3425	20.53	17.9425	20.6825	0	0.4975	0.99	0.6375	0.36	0.395	0.365	0.1775	9.69	12.3525	10.6225	20.7275	22.71	24.2725	22.5925	22.915	0	0.08	4.285	3.685	5.345	10.65	7.8125	8.755	15.7075	13.3325	8.8075	23.7025	17.285	15.885	22.1625
Solyc01g008520	15.2867	Expressed	6.11	4.4225	3.8125	4.59	5.8325	4.1075	4.32	4.6525	3.855	3.4025	3.9125	2.31	2.2975	1.755	1.5	1.2225	15.2867	4.3425	2.225	5.795	6.4675	4.0125	3.6225	4.2425	3.8225	3.5125	3.6575	1.405	1.5725	1.6425	0.975	1.29	8.32	1.13	2.615	5.1625	3.41	3.2575	4.445	3.8675	0.8325	1.095	1.0575	0.685	0.4875	0.5375	0.47
Solyc01g008530	45.475	Expressed	4.87	24.0225	11.88	6.2175	2.9	2.92	2.2075	2.55	2.18	1.3175	1.7225	2.2225	1.4875	0.98	0.245	0.1125	17.99	27.3	11.7225	6.54	2.4475	2.3525	1.6825	1.6675	2.0075	1.57	1.36	0.9675	0.495	0.69	0.1025	0.19	2.97667	3.91333	15.5825	10.605	7.575	4.025	4.46	4.3225	0.69	0.4475	0.36	0.1825	0.1975	0.2575	0.095
Solyc01g008540	13.4933	Expressed	1.85333	6.5825	2.24	1.5475	0.17	0.1225	0.0325	0.0575	1.7825	0.9275	0.675	2.61	1.6425	0.8	0.165	0.03	13.4933	4.585	0.8475	0.5225	0.0225	0.06	0	0	1.895	1.355	0.9	1.2725	0.475	0.6375	0	0	0.0233333	0	0.12	0.05	0	0.025	0	0.075	0	0	0.0775	0	0.035	0.0425	0
Solyc01g008550	337.727	Expressed	231.26	303.655	210.752	89.95	28.2325	14.9125	17.34	19.5525	10.2375	11.69	13.39	6.0225	6.1225	5.1825	3.18	2.35	242.297	279.457	170.38	68.8	25.1875	9.5475	14.45	8.6725	2.8425	3.2525	2.6225	1.7425	1.605	1.9225	0.9225	0.4625	287.22	79.52	54.23	30.9225	17.7825	5.655	7.41	5.985	1.045	0.895	1.125	0.855	0.9325	0.7975	0.5875
Solyc01g008560	61.88	Expressed	12.6333	15.3625	16.655	12.93	16.1525	26.9225	19.4025	17.715	25.5375	16.12	15.3925	19.04	15.3425	15.71	15.405	15.62	31.36	15.585	10.525	11.4975	11.4575	22.39	12.21	13.8475	14.885	10.6975	10.965	12.875	14.7875	15.2925	12.94	18.8825	15.7867	4.21	16.23	15.0975	12.1225	13.98	10.2175	9.2	8.7775	8.365	6.6475	8.835	8.39	7.8225	9.6775
Solyc01g008570	0.0525		0	0	0.03	0	0	0	0	0	0.0275	0	0.03	0	0	0	0	0	0	0	0	0	0.025	0	0	0	0	0	0	0	0	0	0	0	0	0	0	0	0.0325	0	0	0.02	0	0	0	0	0	0.0275	0
Solyc01g008580	0.035		0	0	0	0	0	0	0.035	0	0	0	0	0	0	0	0	0	0	0	0	0	0	0	0	0	0	0	0	0	0	0	0	0	0	0	0	0	0	0	0	0	0	0	0	0	0	0	0
Solyc01g008590	0.0366667		0	0.0325	0	0	0	0	0	0	0	0	0	0	0	0	0	0	0	0	0	0	0	0	0	0	0	0	0	0	0	0	0	0	0	0	0	0	0	0	0	0	0	0	0	0	0	0	0
Solyc01g008600	134.775	Expressed	15.7367	134.775	122.17	43.9375	36.1225	28.9725	33.1625	33.22	22.4375	24.12	22.7375	14.9725	12.535	11.7775	10.2075	12.3725	18.0533	131.94	72.2975	47.585	31.545	33.48	24.425	34.2425	21.455	19.605	20.8275	8.97	11.3175	7.48	10.06	15.5125	4.93	3.23333	40.3525	25.835	12.45	10.2975	11.935	11.535	9.7525	10.28	9.6925	6.2625	7.3525	6.33	8.0675
Solyc01g008610	30.6933	Expressed	0	0	0.025	0	0.0275	0	0	0	0	0	0.03	0	0	0	0	0	0.03	0	0	0	0	0	0	0	0	0	0	0	0	0	0	0	30.6933	0	0	0	0	0	0	0	0	0	0	0	0	0	0
Solyc01g008620	78.385	Expressed	0	0	0	0.15	0.1275	0.16	0.805	0.1475	1.6525	0.215	0.5075	0.2525	0.1125	0.1575	0.0725	0.0875	0	0	0	0.025	0.0925	0	0	0	0	0.015	0.0325	0.0225	0.0275	0	0	0.0125	0	0	0	0.0225	0.0975	0	0.025	0	0.09	0.0275	0	0.065	0.0325	0.55	0.0625
Solyc01g008640	0.385		0	0	0	0	0	0.0225	0	0	0	0	0	0	0	0	0	0	0	0	0	0	0	0	0	0	0	0	0	0	0.0275	0	0	0	0	0	0	0	0	0	0	0	0	0	0	0	0	0.0175	0
Solyc01g008650	1.21	Expressed	0	0	0	0	0	0	0	0	0	0	0	0	0	0	0	0	0	0.0275	0	0	0	0	0	0	0	0	0	0	0	0	0	0	0	0	0.1275	0.24	0.0325	0.02	0.0225	0.075	0	0.03	0.025	0	0	0.0275	0
Solyc01g008660	17.5675	Expressed	0.343333	7.67	7.3675	10.3975	10.1525	8.1175	8.6	9.3625	7.405	9.18	7.525	5.615	5.1025	4.335	4.7925	6.69	1.03667	8.76	6.9175	8.6725	8.5325	8.29	8.005	8.455	4.115	4.5875	5.065	4.5625	4.3425	4.36	4.5575	8.825	0.843333	0.113333	8.205	8.7475	7.0175	5.86	6.665	7.3675	4.2725	4.7625	5.3025	5.65	4.8325	5.1075	6.135
Solyc01g008670	1.82333	Expressed	1.82333	0.065	0.3025	0.075	0.0325	0.045	0.055	0.06	0.23	0.27	0.145	0.2	0.0675	0.0225	0.03	0	0	0.1475	0	0.0525	0.025	0	0.03	0.035	0.035	0.025	0.0525	0.02	0.1275	0.08	0.08	0.135	0	0	0.05	0	0.0625	0	0	0	0	0	0	0.0225	0.035	0	0.0425
Solyc01g008680	1.8675	Expressed	0	0.0875	0.025	0.17	0.11	0.3075	0.17	0.145	0.47	0.465	0.2575	0.5	0.8125	0.4125	1.07	1.4675	0	0.1025	0.025	0.11	0.1375	0.4175	0.2175	0.1475	0.43	0.2125	0.4225	0.5025	1.0275	0.86	0.84	1.795	0	0	0.1625	0.1525	0.095	0.045	0.1625	0.085	0.8075	0.7425	0.76	1.5575	1.215	1.025	1.44
Solyc01g008690	1.4225	Expressed	0	0	0.0475	0.1025	0	0.045	0.1125	0.085	0.2475	0.0575	0.25	0.2125	0.14	0.085	0.1375	0.3375	0	0.055	0	0.105	0.09	0.03	0.0975	0.155	0.27	0.04	0.15	0.2225	0.1225	0.2	0.2525	0.36	0	0	0.0425	0.0775	0.0325	0.045	0.03	0.0525	0.1875	0.03	0.1075	0.1075	0.1025	0.1625	0.17
Solyc01g008700	135.412	Expressed	41.98	24.8725	17.06	15.0525	14.9825	11.575	13.4425	15.3975	57.9075	72.4975	79.5625	130.512	113.28	135.412	89.64	46.6575	108.33	25.8825	14.9425	12.185	7.8425	11.355	8.85	13.1675	87.9475	99.395	99.21	94.1875	83.9325	96.5325	65.97	54.94	30.5967	22.06	15.9275	11.0525	8.4175	8.49	9.9875	9.28	16.6825	21.26	20.765	20.005	19.78	20.575	18.45
Solyc01g008710	2632.43	Expressed	0	0.0675	0	0	0.53	0.115	0.3625	0.0825	229.327	291.435	216.583	2569.76	1921.27	2632.43	1810.41	487.56	0.0333333	0.0625	0	0	0	0.745	1.36	0.5025	311.637	363.005	365.855	2180.62	1653.37	2049.95	1006.24	227.498	0	0	0.0175	0	0	0.2175	1.1525	0.2625	0.405	0.545	1.2825	7.89	4.5825	10.2175	5.6075
Solyc01g008720	13.7075	Expressed	0	0.02	0	0	0	0	0	0	0.1575	0.4475	0.635	4.255	4.79	7.8825	5.235	1.1125	0	2.3175	0.49	0.1625	0	0	0	0	0.1975	0.2525	0.085	2.4175	0.4475	0.765	0.56	0.115	0	0	2.72	1.915	0	0	0	0	0	0	0	0.0225	0	0	0
Solyc01g008730	42.7033	Expressed	9.82333	13.1125	14.1	17.425	21.5275	23.68	25.895	23.7725	31.1675	31.2975	26.1175	32.8075	34.965	33.7225	31.3575	31.0675	26.8967	13.3275	12.6075	17.9075	23.64	26.665	19.73	25.9275	34.6825	30.475	29.7325	31.8375	31.0875	31.8575	28.5275	30.155	35.46	4.27667	15.57	21.53	20.6475	25.405	25.1225	22.28	20.55	21.345	20.1925	24.375	23.525	19.5525	25.815
Solyc01g008740	2.0025	Expressed	0	0	0	0	0	0	0	0	0	0	0	0	0	0	0	0	0	0	0	0	0.05	0	0.0275	0	0	0	0	0	0	0	0.0275	0	0	0	0	0	0	0	0.0475	0	0.0275	0	0	0	0	0	0
Solyc01g008750	0.76		0	0	0	0.025	0.08	0.0775	0.0575	0.0275	0.0225	0.025	0.085	0.0225	0	0.095	0.07	0.0225	0	0	0.0275	0.1375	0.025	0.03	0.0275	0.09	0.025	0.03	0.055	0.0425	0.035	0.0275	0.0275	0	0	0	0.0975	0.385	0.19	0.3825	0.3475	0.27	0.16	0.135	0.24	0.3525	0.1375	0.215	0.2425
Solyc01g008760	7.7075	Expressed	3.75667	5.2025	6.2	6.825	5.6	6.355	7.3125	6.885	7.0575	6.7225	6.595	5.1625	5.65	4.62	5.88	5.2175	4.41667	6.1575	6.4425	4.9375	6.575	5.9325	6.1625	6.3525	5.7175	5.3975	6.2825	4.965	4.085	5.135	4.93	4.99	7.63667	3	5.5275	5.6075	5.9725	6.3275	5.5175	5.3225	4.51	3.36	4.0375	3.54	3.125	3.035	3.3375
Solyc01g008770	78.08	Expressed	23.9433	65.3875	75.8025	59.05	77.5425	63.8675	70.8625	77.97	42.05	45.6475	44.6625	36.1475	38.225	33.94	28.9925	31.9475	33.7567	74.2175	58.5425	78.08	70.4675	65.62	52.76	67.1975	37.1575	39.9625	41.1975	33.045	31.93	33.02	32.6975	34.2675	20.6333	11.3	55.8325	69.185	59.65	47.3775	52.5875	48.5925	25.6275	25.575	29.4575	24.215	25.2025	23.57	24.2625
Solyc01g008780	105.058	Expressed	5	16.57	20.375	31.8575	31.295	26.3925	28.265	31.1275	31.5	33.8975	36.3525	42.545	49.8025	45.825	60.8875	83.7975	11.7733	17.4225	23.9325	27.045	26.0575	26.4175	28.7225	25.5	32.985	39.8725	36.0275	50.9175	53.3075	59.785	61.575	79.93	15.4033	2.64	28.3075	31.6425	31.84	52.9475	52.7525	40.455	55.5525	58.7	64.4675	77.75	91.9175	79.3075	90.2775
Solyc01g008790	156.415	Expressed	1.98	48.12	120.778	123.483	94.63	84.6225	99.2975	102.832	50.17	57.2925	61.8375	12.7325	10.655	8.78	3.735	1.3775	6.39	63.07	120.31	95.1225	61.3225	48.065	43.225	54.0725	19.815	18.0525	21.8575	4.355	3.0025	2.78	1.41	1.115	4.40667	9.75667	119.17	99.5525	59.3425	51.2175	49.3575	44.2025	4.9	4.6875	5.6	0.935	0.88	0.785	0.3825
Solyc01g008800	7.165	Expressed	1.92	3.8	2.6575	2.8625	4.8625	4.7025	5.745	6.285	5.2825	6.5825	7.165	4.8025	5.305	5.1125	2.715	2.08	0.543333	2.34	1.2725	0.7675	0.5925	1.0175	0.8425	1.2975	0.8225	1.1125	0.67	0.8475	0.87	0.9575	0.735	0.77	0.406667	1.06	0.8425	1.37	1.355	1.3275	1.745	0.705	0.445	0.5425	0.4975	0.73	0.4625	0.31	0.345
Solyc01g008810	104.75	Expressed	104.75	44.19	26.4925	21.13	18.77	16.315	18.3	18.5975	16.045	17.34	18.17	13.965	16.005	13.3775	13.915	14.795	74.64	46.1725	23.8175	18.355	18.5675	15.575	18.785	16.85	13.45	14.1375	15.8975	12.435	14.035	13.94	13.725	15.4175	58.62	51.35	30.6125	31.1525	21.2325	15.625	15.5525	15.595	14.9675	14.8375	13.1675	24.2275	22.7925	19.24	21.5175
Solyc01g008820	165.04	Expressed	28.6333	55.985	32.64	32.49	19.9925	17.4975	18.65	20.6325	23.8625	25.4925	25.2325	27.505	27.9825	29.4075	24.4675	24.5325	35.7233	64.7325	34.1575	21.97	18.7525	15.97	15.9775	15.985	22.1725	24.755	23.2825	29.435	26.165	31.6575	19.03	24.635	44.9867	57.3733	49.63	28.5575	21.69	18.8125	18.53	16.3425	23.73	25.7275	28.815	25.33	30.445	25.15	22.7375
Solyc01g008830	12.6875	Expressed	1.75667	0.1825	0.58	0.94	2.6725	4.1575	2.555	2.68	2.4975	3.015	2.6825	1.645	1.0475	1.48	0.8875	0.4425	0	0.335	0.36	0.77	0.9125	2.0775	1.5275	3.155	3.5825	2.7325	4.72	1.415	0.8375	1.7525	0.5175	0.1525	0	0.126667	0.075	0.1575	0.065	0.13	0.1225	0.205	0.05	0.0825	0.0525	0.16	0.0625	0.0275	0.0375
Solyc01g008840	132.575	Expressed	14.3233	86.5675	78.1425	71.8825	109.085	100.627	100	99.8725	113.968	109.905	107.397	111.153	98.32	98.31	86.7225	112.175	14.8033	104.668	62.6575	77.83	84.5375	95.47	71.8925	104.87	121.302	107.69	121.605	98.675	99.52	98.91	111.66	132.575	8.96667	8.7	78.7025	93.7725	84.96	83.7225	81.79	83.355	75.225	75.4475	67.4225	85.0725	71.675	76.88	89.1725
Solyc01g008850	236.518	Expressed	16.53	99.105	96.9225	157.435	179.113	198.575	191.227	169.705	200.708	190.795	173.2	159.363	145.205	125.81	119.022	124.225	41.89	101.5	80.5725	147.615	141.505	190.015	155.525	189.588	236.518	197.965	186.045	148.535	135.588	158.822	128.355	146.963	4.73	4.54667	45.8275	66.3725	56.6675	86.7925	73.355	74.985	118.172	84.6125	89.8225	123.505	102.635	94.26	111.228
Solyc01g008860	2.04333	Expressed	0	0	0	0	0.0325	0	0	0	0	0	0	0	0	0	0	0	0	0.0325	0	0.0275	0	0	0	0	0	0	0	0	0	0	0	0	0	0	0.195	0.1725	0	0.025	0	0	0	0	0	0	0.0275	0	0.025
Solyc01g008870	0.393333		0	0	0	0	0	0	0	0	0	0	0	0	0	0	0	0	0	0	0	0	0	0	0	0	0	0	0	0	0	0	0	0	0	0	0.0175	0	0	0	0	0	0	0	0	0	0	0	0
Solyc01g008880	3.5425	Expressed	0	0.0325	0.055	0.075	0.08	0.0225	0.065	0	0	0	0	0	0	0	0.025	0	0	0.0325	0.0225	0.185	0.1275	0	0	0.035	0	0.03	0	0	0.035	0	0	0	0	0	0.3875	1.1175	0.0325	0.0225	0.0225	0	0	0	0	0.0225	0	0	0.02
Solyc01g008890	70.815	Expressed	35.9067	27.19	20.0075	19.11	19.3725	15.6325	19.13	19.915	17.5025	19	20.1175	15.7375	15.255	14.5875	14.2075	16.4475	49.5	26.9975	16.6925	17.0325	17.4975	18.1875	15.0725	22.105	15.705	13.9775	16.48	14.7025	13.24	13.3325	14.125	18.1225	18.7833	6.31333	23.7225	22.29	16.4175	17.9875	17.3375	19.665	12.0775	11.73	12.1125	13.27	11.6175	11.115	16.2175
Solyc01g008900	26.5867	Expressed	11.7033	9.65	7.7525	7.965	9.5775	8.345	8.2175	9.6975	8.15	9.2775	8.5425	6.1	5.8875	5.9775	5.2525	6.0175	18.04	9.46	7.3975	8.2075	7.6525	7.8875	6.915	7.92	7.4	7.315	7.1775	5.73	6.09	6.375	5.63	7.6475	9.16333	10.1533	6.91	6.3125	6.9425	6.5025	6.3475	5.8925	4.8225	5.19	5.695	3.365	3.7525	3.2825	4.09
Solyc01g008910	81.7	Expressed	54.6667	4.7	2.1825	4.625	3.6125	2.8525	4.5825	3.33	7.3675	7.8375	7.995	7.345	9.9675	9.56	8.825	12.3125	58.65	9.6975	5.1975	2.075	3.0425	3.905	6.05	3.5825	6.7	7.6875	8.385	7	6.8675	6.7925	4.895	7.275	37.7433	27.41	11.3275	4.8975	4.3775	6.87	8.615	5.185	9.015	12.6175	12.255	9.37	9.5475	11.1875	10.8625
Solyc01g008920	16.97	Expressed	0.51	3.6175	5.635	8.995	10.725	9.5375	9.345	8.9125	9.9075	10.2275	10.2425	6	7.295	6.3575	5.83	5.8125	0.313333	4.785	4.8875	5.63	5.925	4.8375	4.215	5.85	3.9275	3.5875	4.36	1.9675	2.3025	2.65	3.07	3.995	1.71	1.01667	8.9575	11.6975	7.2975	4.38	4.47	5.3325	0.45	0.695	0.7725	1.6225	0.7375	0.78	1.12
Solyc01g008930	171.47	Expressed	111.273	44.7575	29.2475	23.27	16.915	12.235	13.6775	16.58	12.8125	14.55	13.515	10.6525	10.245	12.59	13.545	13.805	171.47	41.435	26.0425	18.765	12.515	10.0475	8.17	11.645	9.25	7.97	9.37	7.33	7.735	9.67	9.0825	9.895	94.6633	110.117	25.6825	15.4775	9.74	8.6875	8.5575	8.46	2.935	2.6425	2.86	3.6825	2.4525	2.81	3.57
Solyc01g008940	61.79	Expressed	0.04	0	0.03	0.125	0.0325	0.0225	0.0225	0.06	0	0	0	0	0	0	0	0	0.0333333	0	0.2575	0.295	0.8575	0.385	0.11	0.025	0	0.03	0	0	0.02	0	0	0.0325	0.926667	0	0.8875	4.58	3.085	0.215	0.5775	0.4	0	0.3075	0.1625	0	0.0625	0.0175	0
Solyc01g008950	1053.52	Expressed	1038.07	356.175	246.385	240.815	188.59	193.303	197.47	193.287	202.145	197.803	198.84	148.173	163.5	164.74	169.577	149.43	726.48	349.945	266.7	196.43	291.517	192.018	232.023	179.715	184.512	155.775	170.053	154.373	113.53	152.548	107.578	91.5875	640.74	476.78	262.14	221.697	276.97	191.78	200.46	180.192	125.915	133.535	133.718	129.493	114.907	107.315	104.978
Solyc01g008960	1261.51	Expressed	610.913	318.382	379.598	316.48	508.99	498.832	512.867	510.83	412.632	444.22	462.415	257.957	264.223	247.55	161.53	166.16	661.54	421.207	395.695	689.513	738.288	553.312	568.33	539.497	361.238	365.715	347.8	190.66	152.74	166.165	131.29	159.4	635.887	228.11	445.098	828.05	620.888	525.905	639.32	508.075	160.067	174.227	215.917	111.775	103.32	99.3925	104.93
Solyc01g008970	1143.21	Expressed	306.147	327.05	367.007	417.337	515.705	423.51	444.22	433.762	338.295	353.312	380.442	294.94	298.48	276.225	251.62	193.528	232.953	340.29	366.54	603.97	690.523	575.712	574.668	569.53	367.79	370.858	394.1	239.22	265.033	247.873	275.385	239.618	161.153	236.857	357.748	520.097	431.342	396.045	389.062	519.925	255.265	253.727	273.27	268.897	282.858	288.517	284.025
Solyc01g008980	23.6575	Expressed	1.97	9.1925	5.8925	13.8975	8.7475	8.125	8.79	8.7625	9.605	9.745	9.155	10.9425	10.2775	9.1625	11.0525	13.7375	1.05	8.68	5.4925	6.305	9.14	7.6875	7.15	9.4175	10.6425	8.8975	10.2975	10.1475	10.68	10.6675	11.2475	12.0975	1.33333	0.273333	8.1075	9.56	10.54	10.8975	11.3825	10.7125	8.44	10.2325	8.4125	11.135	11.34	9.27	12.005
Solyc01g008990	36.305	Expressed	19.0967	36.305	25.5425	24.8225	21.52	19.215	20.7225	20.0075	21.5975	21.2275	21.8125	21.86	19.995	19.1925	21.18	23.7175	11.3567	34.225	21.8975	19.9275	19.565	18.495	17.5175	19.2325	22.11	20.8425	21.6175	22.495	19.8	22.485	23.4875	23.525	11.3767	11.4067	19.9825	22.0225	19.3775	18.1725	17.3525	18.495	22.275	20.2425	20.88	21.605	21.9975	21.155	26.6775
Solyc01g009000	145.207	Expressed	15.69	42.785	39.7	69.05	62.755	44.48	53.0775	51.56	52.1975	57.1675	59.01	43.73	46.925	44.66	47.1975	49.335	32.5267	41.1375	49.21	60.18	66.1925	47.4875	64.5425	57.55	43.565	42.715	47.7225	44.15	38.29	44.0925	39.3	46.0075	65.0467	20.4367	85.2775	87.4225	62.2025	54.145	51.6875	58.675	34.7125	36.5575	42.06	43.8	44.475	42.58	46.83
Solyc01g009010	166.39	Expressed	14.7533	64.1075	28.67	25.2625	19.4675	13.655	14.375	19.055	30.9875	37.8525	39.8225	62.12	64.16	82.2	86.6125	89.23	18.0167	61.8475	25.065	21.79	13.4125	10.5625	12.33	11.995	20.81	27.7775	24.87	62.32	54.2	77.7625	44.075	56.1325	23.6133	9.00667	45.0375	25.9	16.755	18.52	18.66	16.31	42.4	48.385	60.965	69.375	99.1275	76.95	66.9025
Solyc01g009020	347.53	Expressed	98.1933	66.2375	75.715	160.835	180.395	153.618	173.11	143.845	194.86	193.715	174.232	151.843	166.83	173.482	181.477	122.022	84.3533	75.16	96.205	164.4	157.243	188.692	184.817	225.238	216.66	187.683	218.46	172.995	133.515	197.995	139.262	62.07	289.547	87.3867	104.703	120.33	126.123	182.425	132.295	146.605	138.43	132.675	121.963	122.16	105.517	110.588	98.7375
Solyc01g009030	58.2733	Expressed	20.0067	29.225	37.4125	26.3775	35.23	34.385	34.785	33.6125	38.865	41.46	40.1225	46.8825	42.5975	42.595	39.695	43.5225	11.43	33.2175	35.81	39.79	30.15	30.0575	25.4325	34.2325	42.955	44.32	40.52	45.3425	46.1	42.325	44.7	54.0425	14.7433	22.8867	30.265	29.905	27.2625	23.08	23.8725	23.94	30.6275	32.93	35.2475	35.6175	36.2325	34.3875	38.7275
Solyc01g009040	48.64	Expressed	2.42667	31.0375	4.3625	1.1075	0.345	0.195	0.2525	0.2625	0.13	0.1275	0.3	0.185	0.105	0	0.03	0.03	0.266667	31.645	4.1075	1.405	0.3575	0.15	0.23	0.5825	0.1175	0.0525	0.165	0	0.02	0	0	0	0.92	23.8333	6.7875	3.6125	0.1325	0.02	0.0275	0.02	0	0	0	0	0.0275	0	0
Solyc01g009050	90.385	Expressed	17.77	39.955	38.725	41.935	51.1925	47.4725	50.9325	53.75	52.97	57.595	57.52	50.3725	56.605	54.02	54.0325	74.735	20.7	43.7375	40.305	53.2325	51.345	49.9675	47.18	51.39	45.91	51.2	50.475	53.155	52.6975	53.315	60.1025	82.0175	54.76	14.6633	41.775	50.3625	58.405	54.9175	62.1625	50.62	44.885	47.425	45.2425	61.6525	66.035	52.77	63.4075
Solyc01g009060	79.9367	Expressed	15.9867	19.9325	20.41	22.8125	25.97	26.82	30.085	29.2275	30.65	33.3625	33.7125	29.4525	29.465	26.3225	28.5875	33.94	20.17	23.9075	23.4575	25.3925	25.7275	24.1775	27.6125	28.0075	25.445	26.32	25.4075	26.6725	25.565	25.0575	25.615	31.525	46.3367	18.96	23.2475	30.21	28.0925	27.76	29.565	27.44	23.64	24.695	23.995	21.6025	21.71	19.855	21.725
Solyc01g009070	61.635	Expressed	11.5733	15.16	14.38	22.84	24.975	20.145	21.7675	26.8825	19.16	19.8125	19.2675	8.8025	9.5425	7.595	5.8275	6.7975	14.9033	15.45	13.6425	15.47	21.415	21.5675	14.155	23.495	16.55	13.025	17.7975	6.5025	6.1025	6.45	5.245	9.845	7.84	1.31	18.315	22.8525	19.285	20.235	23.17	23.3775	6.5675	7.9875	7.295	7.305	6.06	4.5325	6.6625
Solyc01g009080	44.8225	Expressed	11.6667	36.3075	34.675	42.105	20.77	15.2925	17.2725	19.0875	16.1225	16.1925	17.965	12.8	14.5275	14.3825	10.5175	4.445	35.8467	35.2825	34.9	17.955	10.8175	9.7675	9.73	9.8525	7.83	8.47	10.685	5.8275	3.65	6.6575	4.255	2.855	12.9633	4.61667	30.2475	15.4625	13.545	5.05	5.8325	6.2675	0.8775	0.51	0.8075	0.7925	0.61	0.645	0.3625
Solyc01g009090	202.41	Expressed	40.4333	64.8375	53.1625	53.95	62.58	67.37	72.25	70.265	74.69	74.2025	75.91	66.0575	76.1225	70.105	69.3925	85.6475	52.69	79.9625	57.6825	68.9525	72.7425	71.4975	75.3125	65.995	69.53	71.385	67.5675	66.95	66.4225	70.0775	60.73	81.6625	43.9667	25.4733	67.8225	80.685	67.2775	70.5775	70.75	64.705	66.65	68.685	72.4675	76.1925	75.6375	70.3175	71.1125
Solyc01g009100	615.093	Expressed	151.343	207.632	130.44	95.7825	45.45	35.8875	40.3025	42.5675	53.87	58.16	64.5125	34.23	37.2325	33.84	29.8325	36.055	177.763	210.213	142.597	83.0975	37.4725	21.13	35.49	28.4625	29.185	29.9825	29.3075	21.805	20.8	23.145	16.2975	22.7225	45.2233	424.497	88.575	58.7425	34.3025	20.9925	21.8025	21.18	33.3125	35.945	37.035	21.43	25.065	19.5925	19.3975
Solyc01g009110	39.3733	Expressed	12.6333	5.4625	5.0725	10.355	8.4525	6.9125	7.095	7.65	9.3725	8.4675	7.8025	8.37	8.4675	8.71	10.485	15.63	8.85667	6.59	5.1125	7.165	6.1275	5.675	5.755	5.105	6.3675	6.715	6.5825	8.875	7.63	8.7975	9.32	15.31	16.6333	3.18	5.42	6.8025	6.025	7.1525	7.405	6.7125	7.395	8.4375	8.0775	13.53	12.23	10.64	12.5425
Solyc01g009120	12.0625	Expressed	0	1.0475	2.08	2.46	5.06	4.925	5.4425	6.275	5.9825	6.8925	5.6475	6.025	6.8275	6.5625	6.47	9.77	0	1.5075	2.1875	5.25	3.7325	4.135	4.2175	4.89	5.4425	5.24	5.1	5.95	6.76	6.43	8.165	12.0625	0	0	2.475	3.8275	4.335	5.8025	5.32	4.45	5.1875	5.845	6.045	7.3775	7.44	7.115	9.4125
Solyc01g009130	0.025		0	0	0	0	0	0	0	0	0	0	0	0	0	0	0	0	0	0	0	0	0	0	0	0	0	0	0	0	0	0	0	0	0	0	0	0	0	0	0	0	0	0	0	0	0	0	0
Solyc01g009140	0.0366667		0	0	0	0	0	0	0	0	0	0.0325	0	0	0	0	0	0	0	0	0	0	0	0	0	0	0	0	0	0	0	0	0	0	0	0	0	0	0	0	0	0	0	0	0	0	0	0	0
Solyc01g009150	47.6567	Expressed	10.8933	17.22	19.175	23.1725	17.0375	14.8075	16.2075	17.645	14.205	15.76	13.8775	7.765	9.41	9.3225	9.055	9.9325	13.6	16.7775	20.1	20.5075	16.6775	13.0925	16.5925	12.9125	8.9125	10.6525	8.695	8.32	6.8575	9.11	7.7775	7.925	20.5933	26.5933	14.69	15.6075	16.245	12.9875	16.0275	13.645	7.8225	9.39	9.3075	7.3475	7.8525	6.06	6.8475
Solyc01g009160	99.4075	Expressed	4.53667	21.6575	6.3275	3.4975	3.985	99.4075	38.9625	2.8375	77.4425	25.745	2.82	27.47	7.7275	0.4225	3.005	2.575	0.333333	13.8425	3.285	1.235	1.725	78.0875	28.9175	1.81	55.6675	13.6575	3.0225	16.7025	5.78	0.535	2.415	2.23	3.83333	5.79667	10.9975	5.0575	4.71	33.2225	10.895	3.0625	14.8975	3.245	1.0925	5.81	2.0825	0.5475	2.265
Solyc01g009170	658.298	Expressed	38.1633	7.0575	18.32	35.725	90.325	108.305	117.778	110.61	107.718	112.478	120.938	92.065	117.968	105.975	71.5425	43.165	29.7667	11.345	29	79.915	129.395	112.485	156.498	111.743	104.463	93.07	90.9075	71.0025	54.055	67.9675	34.725	24.2325	93.7767	0.99	9.2975	27.5325	34.0375	28.05	38.7125	25.2325	33.6175	30.38	28.2725	16.835	17.9875	14.8175	9.295
Solyc01g009180	89.9	Expressed	23.05	35.28	42.555	31.3125	37.215	40.01	41.74	43.48	48.025	50.51	50.955	53.7075	59.1225	56.9225	54.8975	65.4	27.38	42.825	40.145	40.5675	39.1625	34.1375	34.4775	40.0275	40.9325	46.115	44.0675	47.69	49.51	49.005	54.5875	64.8125	34.8433	18.56	31.815	32.75	31.8525	32.495	35.745	30.6575	27.935	31.8	31.36	37.2125	39.8	38.745	42.31
Solyc01g009190	1.3325	Expressed	0	0	0	0	0	0	0	0	0	0	0	0.025	0	0	0	0	0.56	0	0.0275	0.055	0.0325	0	0	0	0.0325	0	0	0	0	0.02	0	0.025	0	0	0.08	0.4325	0.0325	0	0	0	0.025	0	0	0	0	0	0
Solyc01g009200	24.83	Expressed	3.18667	2.8025	3.37	3.21	1.0975	0.84	1.3325	1.475	0.3325	1.165	0.99	0.185	0.3575	1.0375	0.53	0.255	0.96	3.83	3.7525	2.3775	1.1225	1.2375	1.7075	2.5075	0.465	0.9325	1.8375	0.3	0.5	1.1625	0.58	0.1175	0.126667	0	3.3	1.15	0.7025	0.4175	0.3625	0.2425	0.0475	0.2025	0.17	0.1175	0.035	0.2075	0.0425
Solyc01g009210	0.095		0	0	0	0	0	0	0	0	0	0	0	0	0	0	0	0	0	0	0	0	0	0	0	0	0	0	0	0	0	0	0	0	0	0	0.025	0	0	0	0	0	0	0	0	0	0	0	0
Solyc01g009220	14.05	Expressed	6.53	0.975	0.995	0.605	0.185	0.2125	0.17	0.1475	0.125	0.365	0.3325	0.1125	0.15	0.1775	0.06	0	5.6	0.83	0.8825	0.3175	0.135	0.2425	0.43	0.81	0.32	0.335	0.5	0.105	0.035	0.1725	0.0925	0	0.48	0.0366667	0.79	0.075	0.0325	0.0225	0.025	0.0325	0.05	0	0	0.0225	0	0.0225	0
Solyc01g009230	41.1725	Expressed	6.82	13.8625	12.4225	11.955	21.9475	23.1025	21.3175	23.9375	16.4375	18.8875	17.84	8.0325	7.5025	5.5825	3.115	4.1075	5.62333	14.475	12.66	23.1525	21.465	18.2725	16.315	20.4575	12.6775	11.2325	13.2675	4.2275	3.335	5.0125	3.0025	4.405	1.62333	7.83667	14.34	16.96	13.03	7.83	10.6475	8.64	0.9975	1.42	1.59	1.625	1.5	1.3125	1.135
Solyc01g009240	2.69	Expressed	0	0.12	0.0475	0	0	0.0225	0.1025	0.2	0	0	0	0.0225	0	0	0.03	0	0	0.07	0.0325	0	0.0825	0	0.12	0.135	0	0.1025	0.0425	0.045	0	0.025	0	0	0	0	0	0	0	0	0	0	0	0	0	0	0	0	0
Solyc01g009250	6.02333	Expressed	4.39667	1.0475	0.575	1.545	0.9275	1.3075	0.6025	0.5825	0.8	0.77	0.74	0.7375	0.4225	0.3975	0.2925	0.2375	2.82667	0.7225	0.3375	0.6425	0.94	0.815	0.7725	1.555	0.725	0.88	0.695	0.3725	0.5225	0.265	0.575	0.3525	1.05333	0.233333	0.395	0.495	0.4125	0.2825	0.2475	0.3825	0.5925	0.3975	0.1075	0.45	0.235	0.3075	0.4625
Solyc01g009260	1.765	Expressed	0	0	0.03	0	0	0	0	0	0	0	0.0275	0	0	0	0	0	0	0.0675	0.1725	0.05	0	0	0.0625	0.075	0	0	0.02	0.04	0.035	0	0	0	0	0	0.025	0	0	0	0	0	0	0	0	0	0	0.0425	0
Solyc01g009270	0.5625		0	0	0	0	0	0.0525	0	0.0575	0.055	0	0	0	0.0225	0	0	0.0275	0	0	0	0	0	0	0.0575	0.06	0.1525	0.025	0.05	0	0	0	0	0	0	0	0	0	0	0	0	0	0	0	0	0	0	0	0
Solyc01g009280	83.635	Expressed	11.8	29.4425	37.3225	38.3425	62.86	61.435	68.52	69.015	57.145	62.26	63.4675	45.5725	51.12	46.8325	45.6975	54.295	7.11667	34.8925	33.9375	61.3175	62.385	67.735	56.955	76.705	60.6225	59.7725	68.435	47.3025	53.8425	54.0425	50.8825	66.3625	8.95	2.25333	39.0775	59.2975	57.19	60.4475	67.3775	56.5675	38.145	43.5125	50.9625	47.7	56.8375	43.47	47.4425
Solyc01g009290	52.45	Expressed	22.69	22.07	16.5975	12.98	11.6175	11.2675	11.575	11.9575	14.0625	14.745	15.4725	14.415	13.995	14.12	13.8025	20.4925	23.0367	25.4775	17.4225	14.2175	13.035	11.405	11.2575	12.1625	15.295	13.8025	14.465	14.5625	14.865	15.1175	15.82	20.8875	26.2	11.01	22.085	21.84	16.5175	14.6025	15.13	13.525	11.9075	13.0725	14.2	14.8825	16.8275	14.4775	14.69
Solyc01g009300	121.543	Expressed	10.0333	21.6125	46.355	68.4725	86.1475	95.5175	100.493	100.707	102.405	121.543	119.308	32.3325	35.2175	30.04	18.8375	16.7125	7.92667	21.685	24.5325	87.925	71.245	81.2575	67.0225	91.8375	57.4525	53.3725	65.3225	20.2975	20.1625	22.8525	14.855	17.3775	4.11	1.77333	12.6525	50.5125	39.615	21.625	31.0875	30.635	12.565	14.225	16.0475	19.6825	17.2675	15.35	15.975
Solyc01g009310	266.387	Expressed	43.61	133.61	147.702	212.512	217.072	200.43	218.88	215.215	182.335	190.088	179.315	106.405	98.43	79.5575	76.1775	112.69	40.9767	143.787	124.028	148.363	155.32	160.425	161.85	148.75	129.667	123.655	117.075	86.7775	77.185	75.8475	58.61	88.255	21.7833	28.7767	98.6925	111.713	106.875	101.1	98.905	100.92	73.3275	74.3925	78.8825	54.815	57.415	45.4475	49.465
Solyc01g009320	1.22667	Expressed	0	0	0	0	0	0	0	0	0.0225	0	0	0	0	0	0	0	0	0.0225	0	0	0	0	0	0	0	0	0	0	0	0	0	0	0	0	0	0	0	0	0	0	0	0	0	0	0	0	0
Solyc01g009330	0.5475		0	0	0	0	0	0	0	0	0	0	0	0	0	0	0	0	0	0	0	0	0	0	0	0	0	0	0	0	0	0	0	0	0	0	0	0	0	0	0	0.02	0	0	0	0	0	0	0
Solyc01g009340	37.2575	Expressed	0.663333	8.3825	2.3075	0.9975	1.2575	0.6575	1.2175	1.7125	0.495	1.045	0.9725	0.3175	0.2125	0.4375	0.41	0.2625	0.743333	9.065	3.5175	1.3275	1.09	0.66	1.01	2.1725	0.4175	0.3625	1.53	0.065	0.2825	0.55	0.22	0.0625	0	0	2.4	1.14	0.2875	0.295	0.2925	0.3825	0.095	0.0475	0.0275	0.0325	0	0.0525	0.0225
Solyc01g009350	0.506667		0.03	0	0	0	0	0	0	0	0	0	0.045	0	0	0	0	0	0	0.04	0.0275	0	0	0	0	0	0	0	0	0	0	0	0	0	0	0	0.025	0	0	0.0225	0	0	0	0	0	0	0	0	0
Solyc01g009360	0.533333		0	0	0	0	0	0	0	0	0	0	0	0	0	0	0	0	0	0.0225	0	0	0	0	0	0	0	0	0	0	0	0	0	0	0	0	0	0	0	0	0	0	0	0	0	0	0	0	0
Solyc01g009370	86.345	Expressed	0.64	0.07	0.055	0	0.0325	0.1275	0.105	0	0.0225	0	0	0	0	0	0	0	0.196667	0.075	0.025	0	0	0	0.19	0	0	0.025	0.1075	0.02	0.165	0.175	0.0275	0.045	0.03	0	0.035	0.0225	0.26	1.49	2.4125	1.325	1.565	0.94	1.8575	1.735	1.5825	1.6	0.81
Solyc01g009380	21.0375	Expressed	12.1	11.3475	14.22	12.775	15.7325	16.0925	15.485	15.895	14.98	18.0825	17.7325	12.4675	11.23	11.4025	12.3375	19.7675	7.07	12.475	12.05	14.98	12.8475	12.69	13.045	11.7475	11.65	12.525	12.8125	11.56	10.7375	12.1125	10.47	21.0375	5.52667	8.80667	10.305	11.185	11.6575	13.61	15.395	13.0425	8.93	9.4075	10.745	11.7275	12.7675	9.8525	11.6
Solyc01g009390	90.2667	Expressed	4.98	8.345	8.8325	12.0625	9.81	10.2575	10.245	8.8475	13.1025	14.135	14.42	14.615	15.465	14.0975	13.95	17.2875	21.9767	8.4775	10.53	8.6725	10.9225	10.1925	9.5125	10.2425	16.3625	15.7275	16.7225	14.7	14.95	15.0975	13.825	18.1375	26.51	29.5467	11.465	11.92	11.9875	11.025	12.52	11.0925	12.09	12.4475	11.9575	12.5125	13.5325	11.5475	14.1825
Solyc01g009400	0.04		0	0	0	0	0	0	0	0	0	0	0	0	0	0	0	0	0	0	0	0	0.025	0	0	0	0	0	0	0	0	0	0	0	0	0	0	0	0	0	0	0	0	0	0	0	0	0	0
Solyc01g009410	0.0633333		0.0633333	0	0	0	0	0	0	0	0	0	0.0225	0	0	0	0	0	0.0333333	0.02	0.025	0	0	0	0	0	0	0	0	0	0	0	0	0	0.0533333	0	0	0	0	0	0	0	0	0	0	0	0	0	0
Solyc01g009420	669.21	Expressed	14.9833	371.32	435.613	582.763	579.077	532.28	532.655	561.003	398.4	419.07	475.04	320.548	314.342	312.43	299.695	277.192	79.9767	303.77	435.79	593.285	633.695	616.565	542.5	601.087	451.712	424.137	456.2	354.608	311.163	351.577	290.94	305.235	32.5067	37.1	261.1	429.498	429.067	313.317	362.375	348.505	206.697	197.882	195.028	243.653	249.375	211.415	255.84
Solyc01g009430	441.673	Expressed	58.1233	12.715	14.505	84.4875	82.9625	71.99	91.3625	92.0375	269.62	372.15	399.835	217.93	209.113	213.738	173.545	192.495	68.0367	11.1425	15.4075	42.9225	62.5675	66.3025	78.635	91.6175	288.188	233.925	357.712	252.125	222.49	288.175	204.738	207.375	40.9133	6.01667	12.75	23.7375	24.9575	15.1175	16.7725	16.265	9.57	15.07	11.205	18.9025	16.78	14.6675	20.85
Solyc01g009440	0.415		0	0	0	0	0	0	0	0	0	0	0	0	0	0	0	0	0	0	0	0	0	0	0	0	0	0	0	0	0	0	0	0	0	0	0	0	0.095	0	0	0	0	0	0	0	0	0	0
Solyc01g009450	61.995	Expressed	12.4633	36.3425	35.005	42.6775	42.135	37.2275	42.0075	39.385	45	45.16	47.71	31.9725	35.275	36.5125	33.79	36.5925	21.7467	33.4125	28.805	43.355	48.6375	52.3	42.295	60.4075	56.22	49.28	58.9725	36.7075	40.4225	42.5	41.22	49.28	10.7233	3.66333	29.08	36.1275	33.5675	42.615	37.92	39.1225	37.6525	41.72	38.7875	44.365	52.2425	39.0975	52.285
Solyc01g009460	0.965		0.233333	0	0	0.0975	0.1125	0.0525	0.0325	0.11	0.1075	0.225	0.105	0.0425	0.0225	0.0275	0.0225	0.0575	0.1	0.0525	0	0.075	0.025	0.06	0	0.095	0	0.0525	0.05	0.02	0.055	0.0275	0	0	0.376667	0.3	0	0.0225	0.0675	0.02	0.1	0	0.03	0.03	0.025	0.0225	0.0625	0	0
Solyc01g009470	993.65	Expressed	0	0	0	0	0.14	0.56	0.15	0	0	0	0	0	0	0	0.115	0.3275	0	0	0	0.2825	2.04	2.5325	0.21	0.31	0.32	0.6725	0.2175	0.065	1.705	0.9525	0.73	1.695	0	0	0.1975	2.23	6.38	1.41	3.5425	5.6225	3.7125	1.125	2.8025	0.8325	4.2325	3.8575	1.845
Solyc01g009480	0.3225		0	0.0225	0	0	0	0	0	0	0	0	0	0	0	0	0	0	0	0.0225	0	0	0	0	0	0.035	0	0	0	0	0	0	0	0	0	0	0.0625	0	0.0325	0.0625	0.17	0.2075	0	0.0625	0.0275	0	0	0	0
Solyc01g009490	0.256667		0	0	0	0	0	0	0	0	0	0	0	0	0	0	0	0	0	0.075	0	0	0	0	0	0	0	0	0	0	0	0	0	0	0	0	0.0175	0	0	0	0	0	0	0	0	0	0	0	0
Solyc01g009500	50.4467	Expressed	33.4867	5.295	4.8125	6.1075	9.2425	9.1375	9.87	9.8725	9.5725	8.905	7.875	7.985	6.475	5.19	5.5575	7.5625	32.98	5.255	4.105	5.395	5.5425	7.6525	6.0625	6.7925	5.7775	5.3625	4.645	4.7925	4.255	3.4025	4.6275	5.56	9.48667	30.5	9.215	8.6825	7.895	10.46	8.7225	7.7675	3.535	2.9175	3.4725	3.0575	2.2	2.38	3.1075
Solyc01g009510	90.67	Expressed	0	0	0.0675	0.575	0.025	0	0	0	0.0225	0	0	0	0	0	0	0	0	0	0.3075	2.225	0.34	0.03	0	0	0	0	0	0	0	0	0	0	0	0	2.0325	26.6025	1.6075	0	0.0225	0.04	0	0	0	0	0	0	0
Solyc01g009520	428.89	Expressed	230.693	179.07	150.165	166.345	143.325	159.6	164.352	166.67	171.632	166.257	184.227	78.9125	86.94	74.3975	75.115	91.8125	216.103	176.8	163.743	197.537	183.28	146.308	177.438	140.623	122.922	113.543	117.698	67.1675	53.75	68.1875	55.3525	58.605	73.7067	327.873	132.71	154.825	136.007	104.328	102.065	106.74	97.9675	102.028	111.55	81.06	76.93	70.0725	64.2525
Solyc01g009530	0.125		0	0	0	0	0	0	0	0	0.0275	0.025	0	0	0.0225	0.05	0	0.0275	0	0.0625	0.0225	0	0	0	0	0	0	0	0	0	0	0.025	0	0.0225	0	0	0	0	0	0	0.025	0	0.06	0.0275	0	0.0225	0	0	0
Solyc01g009540	0.075		0	0	0	0	0	0	0	0	0	0	0	0	0	0	0	0	0	0.0425	0	0	0	0	0	0	0	0	0	0	0	0	0	0.0125	0	0	0	0	0	0	0	0	0	0	0	0	0	0	0
Solyc01g009550	0.61		0	0.045	0.0825	0.095	0	0	0	0	0	0	0	0.045	0	0.035	0	0.13	0	0.1025	0.245	0.1	0.1075	0	0.09	0	0	0.015	0	0.0425	0	0	0	0	0.0233333	0	0.0175	0	0.0325	0.04	0.565	0.1025	0.0275	0.155	0.055	0.02	0	0	0
Solyc01g009560	0.03		0	0	0	0	0	0	0	0	0	0	0	0	0	0	0	0	0	0	0	0	0	0	0	0	0	0	0	0	0	0	0	0	0	0	0	0	0	0	0	0	0	0	0	0	0	0	0
Solyc01g009570	3.9075	Expressed	2.26	3.9075	0.55	0.15	0	0	0.0575	0	0	0	0	0	0	0	0.0225	0	1.17667	2.3225	0.2675	0.0525	0	0	0	0	0	0	0	0	0	0	0	0	0.41	0.106667	0.285	0.0775	0	0	0	0	0	0	0	0	0	0	0
Solyc01g009580	7.305	Expressed	0	0	0	0	0	0.055	0	0.0275	0	0	0.03	0	0	0	0	0	0	0.0325	0	0.075	0.09	0.265	0.145	0.0575	0	0	0.02	0	0	0	0	0	0	0	0	0	0	0	0	0	0	0	0	0	0	0	0
Solyc01g009590	0.0625		0	0	0	0	0	0	0	0	0	0	0	0	0	0	0	0	0	0	0	0	0	0	0	0	0	0	0	0	0	0	0	0	0	0	0	0	0	0	0	0	0	0	0	0	0	0	0
Solyc01g009600	0.08		0	0	0.0225	0	0	0	0	0	0.0225	0	0	0	0	0	0	0	0	0.0275	0	0	0	0	0	0	0	0	0.02	0	0	0	0	0	0	0	0	0	0	0	0	0	0	0	0	0	0	0	0
Solyc01g009610	117.228	Expressed	33.84	117.228	97.325	105.7	65.5425	54.3125	57.06	57.1475	32.265	28.2475	29.9775	18.4175	17.315	18.2525	15.87	12.1175	40.83	100.948	65.14	42.1375	49.895	49.1825	34.48	49.81	24.635	19.98	20.2125	17.355	15.68	17.145	17.235	11.5925	19.0967	30.3633	37.6775	31.5075	26.4475	14.2625	13.0675	16.83	10.2275	9.3375	7.9425	10.8575	8.5725	9.6525	9.3675
Solyc01g009620	61.02	Expressed	17.1767	26.945	25.99	18.8225	13.1625	13.0725	13.6525	15.02	17.03	15.5675	18.35	13.9675	15.1725	13.335	18.1575	24.8825	14.8167	25.8875	30.1975	17.9175	11.605	10.795	11.7475	11.23	9.7975	12.675	10.3625	14.7075	13.62	16.425	16.255	21.3975	15.1333	61.02	27.195	18.65	15.965	14.6575	13.545	14.9975	16.175	14.68	16.41	18.5125	18.9625	17.4325	23.4975
Solyc01g009630	75.17	Expressed	19.32	37.3025	31.2075	26.9375	22.4225	23.5125	22.86	26.6375	27.8125	29.4175	28.9775	36.3525	34.295	34.0675	37.7825	50.4025	32.06	38.4425	33.495	27.32	20.335	17.9925	16.05	17.9925	17.655	19.9325	19.405	29.865	26.53	29.1075	32.955	48.8725	43.7133	48.4767	33.4575	28.875	20.2125	18.3275	15.8475	19.485	21.5975	20.415	20.6625	32.28	29.0425	30.235	38.955
Solyc01g009640	0.37		0	0	0	0	0	0	0	0	0	0	0	0	0	0	0	0	0.03	0.275	0.025	0	0	0	0	0	0	0	0	0	0	0	0	0	0	0	0.025	0	0	0	0	0	0	0	0	0	0	0	0
Solyc01g009650	0.0225		0	0	0	0	0	0	0	0	0	0	0	0	0	0	0	0	0	0	0	0	0	0	0	0	0	0	0	0	0	0	0	0	0	0	0	0	0	0	0	0	0	0	0	0	0	0	0
Solyc01g009660	922.707	Expressed	0	0	0	0	0.1325	0.7	0.36	0	0	0	0	0	0.0225	0	0.07	0.0825	0	0	0	0.025	0.6875	1.99	0.3725	0.2	0.275	0.7625	0.0675	0.105	1.1375	1.205	0.6875	1.355	0	0	0	0.205	4.265	2.65	3.78	5.15	4.4075	1.92	1.85	0.5175	2.74	2.3075	1.24
Solyc01g009670	7.6425	Expressed	1.19333	6.865	3.9825	2.06	1.385	1.325	0.9775	1.1675	1.01	0.925	1.565	0.185	0.22	0.2	0.095	0.175	0.136667	7.6425	3.03	1.685	0.93	0.82	0.3575	0.5	0.3375	0.3	0.64	0.13	0.09	0.1725	0.05	0.0825	0.496667	2.17667	3.1875	1.165	0.9	0.4025	0.54	0.47	0.075	0.145	0.26	0.1075	0	0.1775	0.1225
Solyc01g009680	2.3525	Expressed	0	0.5825	0.6575	0.28	0.0325	0.0225	0	0.0275	0.05	0.1275	0.0575	0.64	1.23	1.17	1.61	2.3525	0	1.0525	1.52	0.2125	0.0275	0	0	0.025	0.0975	0.055	0.07	0.545	0.4875	0.42	0.2975	0.44	0	0	0.05	0	0	0.02	0.1225	0	0.2325	0.9975	0.105	0.2375	0.065	0.0225	0.105
Solyc01g009690	0.95		0	0	0	0.0975	0.1275	0.6475	0.2325	0.0875	0.95	0.1925	0.275	0.1125	0.295	0.11	0.085	0	0	0	0	0.08	0.1425	0	0	0	0	0.025	0	0	0.0325	0	0	0	0	0	0.0375	0.0275	0.0325	0	0	0	0	0	0	0	0	0	0
Solyc01g009700	3.21333	Expressed	0.03	0.065	0.025	0.0775	0.1375	0.1325	0.155	0.115	1.4675	0.345	0.2175	0.165	0.08	0	0.03	0.03	0.03	0.0475	0.05	0.05	0.16	0.0325	0	0	0.07	0.025	0.025	0.0225	0.0475	0.0275	0.0275	0	0	0	0.0175	0.5075	0.87	0.0675	0.0225	0.0775	0	0.025	0	0	0	0	0
Solyc01g009710	0.04		0	0	0	0.0275	0	0	0	0	0	0	0	0	0	0	0	0	0	0	0	0	0	0	0	0	0	0	0	0	0	0	0	0	0	0	0.0175	0	0	0	0	0	0	0	0	0	0	0	0
Solyc01g009720	2.0225	Expressed	0	0.135	0.2325	0.175	0.1875	0.03	0.1125	0.2275	0.08	0.17	0.1375	0.0225	0.0525	0.0225	0.0225	0.0225	0	0.37	0.2225	0.215	0.0525	0.0875	0.03	0.0575	0.1375	0.15	0.0775	0	0.02	0.07	0	0.035	0	0	0.0175	0.0775	0.03	0	0.03	0	0	0.0525	0	0.02	0	0.0425	0.0175
Solyc01g009730	0.0575		0	0	0	0	0	0	0	0	0	0	0.0275	0	0	0	0	0	0	0	0	0.0275	0	0	0	0	0	0	0	0	0	0	0	0	0	0	0	0	0	0	0.0275	0	0	0	0	0	0	0	0
Solyc01g009740	0.93		0	0	0	0	0	0	0	0	0	0	0	0	0	0	0	0	0	0.055	0.0225	0	0	0	0	0	0	0	0	0	0	0	0	0	0	0	0.035	0	0	0	0	0	0	0	0	0	0	0	0
Solyc01g009750	455.52	Expressed	86.1267	73.275	128.312	100.647	114.82	125.328	142.225	109.998	130.44	122.66	113.802	130.19	156.528	151.257	211.757	235.588	74.72	63.5425	126.677	73.255	122.605	160.8	198.37	197.74	172.855	164.33	202.975	150.928	179.167	156.998	197.738	190.645	189.617	71.57	123.935	80.7725	118.802	136.995	97.1975	137.27	196.347	172.023	116.25	156.368	116.79	149.648	160.645
Solyc01g009760	29.0567	Expressed	0.573333	0.665	0.795	1.7775	1.5175	1.7925	2.2075	3.0525	1.825	1.73	2.71	1.155	0.865	1.405	1.245	1.385	0.496667	0.8825	1.42	1.7675	2.5575	3.09	3.005	3.3375	1.6825	2.2875	2.73	2.2175	1.225	2.0225	0.8825	0.855	0.0533333	0.0433333	1.0325	0.765	1.075	0.7175	0.4	0.205	0.22	0.3725	0.3025	0.355	0.155	0.3275	0.205
Solyc01g009770	55.23	Expressed	10.71	42.4475	13.215	6.105	4.5375	2.4275	2.3625	2.1125	2.01	1.8925	2.42	3.9025	3.4225	4.3425	4.0875	1.935	6.37667	32.21	10.625	4.435	4.175	1.8025	1.3725	2.71	5.1025	6.5075	6.855	7.445	7.7825	7.225	4.95	3.785	0.46	1.31	4.625	3.5225	0.9375	0.2325	0.35	0.545	6.445	6.3575	6.95	9.42	10.365	9.19	8.87
Solyc01g009780	90.455	Expressed	39.9067	21.155	19.805	27.0975	21.8775	80.77	47.8675	26.865	85.83	48.64	32.1425	64.27	43.175	33.9575	48.045	51.83	39.5967	18.01	21.7475	19.185	24.965	50.2975	36.2525	22.9975	56.63	34.64	29.1225	62.5625	41.3175	40.2575	35.705	40.2075	45.38	34.4933	23.8925	25.4825	27.7825	60.5475	36.9575	27.5125	72.8375	44.7	42.3225	73.8425	60.1825	42.085	57.625
Solyc01g009790	0		0	0	0	0	0	0	0	0	0	0	0	0	0	0	0	0	0	0	0	0	0	0	0	0	0	0	0	0	0	0	0	0	0	0	0	0	0	0	0	0	0	0	0	0	0	0	0
Solyc01g009800	0.0725		0	0	0	0	0	0	0	0	0	0	0	0	0	0	0	0	0.03	0	0	0	0	0	0	0	0	0	0	0	0	0	0	0	0	0	0	0.0275	0	0	0	0	0	0	0	0	0	0	0
Solyc01g009810	0.7325		0	0	0.03	0.025	0	0.0675	0.1675	0	0.4125	0.0625	0	0.0225	0.125	0.08	0	0	0	0	0	0.0525	0.0225	0	0	0	0	0	0	0.02	0	0.0575	0.045	0	0	0	0.205	0.1675	0	0	0.03	0	0	0	0.025	0	0	0	0
Solyc01g009820	49.62	Expressed	2.88	10.765	16.0375	14.675	28.67	43.4	33.76	31.1225	39.53	34.03	31.555	36.9225	40.875	37.39	35.555	44.205	1.56667	11.105	16.27	20.2025	28.1275	39.9425	29.1575	33.55	38.905	34.7975	38.2825	33.9925	35.785	34.4725	38.115	49.01	5.50333	2.77333	17.33	27.475	30.6225	40.52	38.1725	32.0525	31.4225	27.465	28.9925	32.605	31.565	30.5725	37.6125
Solyc01g009830	32.25	Expressed	2.74333	0	0.0475	0.45	2.1475	1.665	2.2125	3.325	1.2175	1.0325	1.015	0.095	0.0225	0.0225	0	0	2.44667	0.0875	0.0475	0.47	1.925	1.455	2.3325	3.64	1.04	1.18	1.125	0	0	0	0.09	0	0.886667	0	0.0175	0.1	0.2575	0.5375	0.6525	0.5575	0.0775	0.0825	0.08	0	0	0	0
Solyc01g009840	0.4725		0	0	0	0	0	0	0	0	0	0	0	0	0	0	0	0	0	0	0	0	0	0	0	0	0.0325	0.025	0	0	0.02	0.0575	0.0275	0.0125	0	0	0	0.0275	0	0	0	0	0.17	0.1175	0.0825	0.3725	0.325	0.4725	0.235
Solyc01g009850	145.693	Expressed	79.7133	64.3	42.485	29.53	18.91	14.675	16.7475	16.3675	21.8025	23.365	23.0175	19.5975	20.49	21.135	25.6775	29.7125	98.7967	65.46	42.4475	23.7225	15.53	14.425	16.7275	17.8325	23.3425	20.8025	23.6875	21.1325	21.7	24.65	22.3825	22.3125	114.057	102.127	41.59	26.7075	19.8375	16.095	15.91	13.995	18.4425	20.8275	21.8225	23.885	26.2	20.2425	25.7125
Solyc01g009860	215.045	Expressed	10.1033	28.8575	37.4675	26.81	24.5025	24.535	25.58	25.6925	46.865	53.2325	49.9675	26.5275	18.14	15.165	11.1775	11.2275	9.46333	30.2175	33.5175	28.5825	26.9525	23.6275	20.3025	27.9125	21.335	22.945	26.13	12.2275	9.93	10.3325	10.3525	11.0525	3.32333	14.5833	55.4975	65.32	69.84	39.4225	48.2725	59.235	18.6125	21.105	18.94	12.085	11.1575	10.4475	10.0525
Solyc01g009870	56.15	Expressed	5.06333	17.585	19.3925	31.185	40.1825	56.15	35.815	33.1675	17.4125	6.0875	6.0825	4.4575	1.72	0.4425	0.945	0.545	0	11.5675	6.0475	19.105	17.2125	28.7	12.25	15.46	4.4075	1.215	1.94	1.2	0.6	0.4075	0.6325	0.63	0	0	0.68	0.4775	1.1575	0.7325	0.4925	0.9925	0.8975	0.2475	0.1	0.6	0.3	0.145	0.5725
Solyc01g009880	0.045		0	0	0	0	0	0	0	0	0	0	0	0	0	0	0	0	0	0	0	0	0	0	0	0	0	0	0	0	0	0	0	0	0	0	0	0	0	0	0	0	0	0	0	0	0	0	0
Solyc01g009890	0.0933333		0	0.07	0	0	0	0	0	0	0	0	0	0	0	0	0	0	0	0.0425	0	0	0	0	0	0	0	0	0	0	0	0	0	0	0	0	0	0	0	0	0	0	0	0	0	0	0	0	0
Solyc01g009900	2.51667	Expressed	0	0.2225	0.1025	0	0	0	0	0	0	0	0	0	0	0	0	0	0	0.0425	0.0275	0	0	0	0	0	0	0	0	0	0	0	0	0	2.51667	0	0	0	0	0	0	0	0	0	0	0	0	0	0
Solyc01g009910	0.74		0.74	0.08	0.0225	0	0	0	0	0	0	0	0	0	0	0	0	0	0	0.0275	0	0	0	0	0	0	0	0	0	0	0	0	0	0	0.0466667	0.0433333	0.035	0	0	0	0	0	0	0	0	0	0	0	0
Solyc01g009920	0.9		0	0	0	0	0	0	0	0	0	0	0	0	0.0275	0	0.0225	0.0525	0	0	0	0	0	0	0	0	0	0	0	0.02	0	0	0	0	0	0	0	0	0	0	0	0	0.0725	0	0.105	0.2275	0.035	0.04	0.075
Solyc01g009930	0.166667		0	0	0	0.025	0	0	0	0	0.1625	0.0325	0	0	0	0	0	0.03	0	0	0.0225	0.025	0	0	0	0	0	0	0	0.045	0	0	0	0	0	0	0.0625	0.03	0	0	0	0	0	0	0	0	0	0	0
Solyc01g009940	0.153333		0	0	0	0	0	0	0	0	0	0	0	0	0	0	0	0	0	0	0	0	0	0	0	0	0	0	0	0	0	0	0	0	0	0	0	0	0	0	0	0	0	0	0	0	0	0	0
Solyc01g009950	0.105		0	0	0	0	0	0	0	0	0	0	0	0	0	0	0	0	0	0	0	0	0	0	0	0	0	0	0	0	0	0	0	0	0	0	0	0	0	0.02	0	0	0	0	0	0	0.035	0	0
Solyc01g009960	0.0525		0	0	0	0.025	0	0	0	0	0	0	0	0	0	0	0	0	0	0	0	0.025	0	0	0	0	0	0	0	0	0	0	0	0	0	0	0	0	0	0.02	0	0	0	0	0	0	0.035	0	0
Solyc01g009970	48.36	Expressed	15.6333	32.995	29.265	27.1075	21.88	16.525	18.745	22.66	23.2475	23.9225	27.1775	22.8	28.2325	31.0675	27.7425	27.625	16.32	34.8025	32.385	22.54	17.37	14.8575	16.775	15.4925	20.5275	22.6525	20.4575	21.6	20.915	22.17	19.725	22.4325	25.86	26.33	26.6025	19.4925	18.46	21.3625	18.3625	18.435	13.6575	13.88	17.055	17.4975	15.925	17.335	16.51
Solyc01g009980	0		0	0	0	0	0	0	0	0	0	0	0	0	0	0	0	0	0	0	0	0	0	0	0	0	0	0	0	0	0	0	0	0	0	0	0	0	0	0	0	0	0	0	0	0	0	0	0
Solyc01g009990	395.52	Expressed	149.69	317.13	277.147	200.455	121.765	82.3025	88.975	93.05	78.045	82.6175	83.4275	66.215	77.4925	79.7675	96.48	122.272	136.273	320.543	313.043	194.925	104.135	70.2025	73.5175	79.355	74.195	75.21	79.4425	85.795	94.8675	90.44	97.9075	133.493	204.287	395.52	284.455	175.998	122.912	69.395	67.15	76.835	76.5025	85.7725	93.715	93.3675	98.935	89.83	111.12
Solyc01g010000	51.2367	Expressed	9.04	11.625	10.4525	9.85	12.205	7.9725	10.7925	11.14	13.435	16.3625	16.1175	19.115	18.2925	19.3425	17.95	18.585	4.71333	10.3025	9.775	8.585	8.9675	7.465	9.28	10.8175	12.6675	14.2725	15.4275	14.635	17.3425	17.485	17.285	18.71	4.20667	9.76333	9.1225	12.235	11.2	10.92	11.365	10.27	8.34	9.6975	9.7525	9.635	9.215	9.79	10.1675
Solyc01g010010	0.11		0	0	0	0	0	0.0325	0	0	0	0	0	0	0	0	0	0	0	0.0525	0	0.0275	0	0	0	0	0	0	0	0	0	0	0	0.0125	0	0.0333333	0.025	0	0	0	0	0	0	0	0	0	0	0	0
Solyc01g010020	23.67	Expressed	1.64	3.045	2.1775	1.54	1.9475	3.29	3.565	2.0525	4.345	3.9275	1.985	3.185	1.875	0.9525	1.1725	1.0775	0.616667	3.4575	0.74	0.105	0.305	0.355	0.4575	0.4625	0.4875	0.3675	0.33	0.7875	0.49	0.3125	0.4575	0.2	0.163333	2.59	1.755	1.2825	0.64	0.58	0.11	0.23	0.185	0.06	0	0.15	0.06	0.0175	0.0225
Solyc01g010030	32.2525	Expressed	4.40333	18.4575	22.06	5.7725	7.95	6.7725	6.8525	5.5925	6.2125	6.27	6.245	6.7625	9.32	6.2075	6.515	5.625	3.71	18.2825	24.755	10.9325	6.2	7.085	4.34	6.94	6.65	7.805	7.46	6.095	8.1325	6.575	7.295	6.9675	1.85667	1.53	20.6625	8.9375	4.1375	3.4875	3.525	3.5325	5.0625	4.34	3.8975	3.8625	4.2375	3.5825	3.9625
Solyc01g010040	181.22	Expressed	72.9067	33.2075	24.8825	33.69	29.1775	19.7	21.2475	27.6025	21.15	22.7125	26.43	16.25	15.52	17.8825	14.3775	18.0575	103.61	37.2075	27.45	29.6075	20.0175	19.72	15.3175	17.4475	19.08	17.8825	19.1575	12.7875	12.7775	17.02	12.2275	20.485	93.58	61.07	28.73	29.18	23.8825	23.8275	21.225	21.215	23.64	27.31	30.735	21.53	28.545	23.4125	21.6425
Solyc01g010050	181.22	Expressed	72.9067	33.2075	24.8825	33.69	29.1775	19.7	21.2475	27.6025	21.15	22.7125	26.43	16.25	15.52	17.8825	14.3775	18.0575	103.61	37.2075	27.45	29.6075	20.0175	19.72	15.3175	17.4475	19.08	17.8825	19.1575	12.7875	12.7775	17.02	12.2275	20.485	93.58	61.07	28.73	29.18	23.8825	23.8275	21.225	21.215	23.64	27.31	30.735	21.53	28.545	23.4125	21.6425
Solyc01g010060	187.493	Expressed	23.0233	1.035	0.695	0.4275	0.4	6.1275	2.5925	0.865	26.2025	12.8725	2.2975	20.425	8.545	1.28	3.9275	7.3575	10.98	0.65	0.3375	0.1625	0.1075	3.2375	1.2475	0.1125	16.32	8.4025	1.5075	25.8575	8.9225	1.875	3.76	3.49	33.2267	3.49333	1.2475	0.525	0.6475	5.6725	1.93	0.5075	27.4525	10.1425	2.67	23.095	13.4425	1.685	12.5825
Solyc01g010070	0.0275		0	0	0	0.0275	0	0	0	0	0	0	0	0	0	0	0	0	0	0	0	0	0	0	0	0	0	0	0	0	0	0	0	0.025	0	0	0	0	0	0	0	0	0	0	0	0	0	0	0
Solyc01g010080	13.325	Expressed	0	0	0	0.1	0.0325	0.0625	0	0	0	0	0.03	0.0225	0	0.0225	0	0	0	0	0.075	0.13	0.17	0.1175	0	0	0	0.03	0.025	0.0425	0.0275	0	0.0275	0.025	0.0233333	0	0.455	2.1325	0.8075	0.125	0.125	0.0675	0.075	0.085	0.1375	0.1075	0.1025	0.11	0.055
Solyc01g010090	0.21		0	0	0	0	0	0	0	0	0	0	0	0	0	0	0	0	0	0	0	0	0	0	0	0	0	0	0	0	0	0	0	0	0	0	0	0.0225	0	0	0	0	0	0	0	0	0	0	0
Solyc01g010100	0.1875		0	0	0	0	0	0	0	0	0	0	0	0	0	0	0	0	0	0.0275	0.0325	0	0	0	0	0	0	0	0	0	0	0	0	0	0	0	0.025	0.0225	0	0	0	0	0	0	0	0	0	0	0
Solyc01g010110	0.1025		0	0	0	0	0.0325	0.0325	0	0	0	0.025	0	0.025	0	0	0.0225	0	0	0	0	0	0	0	0	0	0	0	0	0	0	0.02	0	0.025	0	0	0	0	0	0	0	0	0	0.06	0.1025	0	0.055	0	0
Solyc01g010120	0.025		0	0	0	0	0	0	0	0	0	0	0	0	0	0	0	0	0	0	0	0	0	0	0	0	0	0	0	0	0	0	0	0	0	0	0	0	0	0	0	0	0	0	0	0	0	0	0
Solyc01g010130	31.3167	Expressed	8.27	21.9225	19.79	10.28	12.155	9.92	10.585	10.5575	6.1975	7.9575	8.9575	4.09	4.82	5.1425	3.8025	5.5125	16.8	18.8125	13.245	12.4475	10.3375	7.53	6.71	9.6325	4.81	4.9825	6.1925	2.865	3.0325	3.0425	2.97	4.64	2.85333	0.76	8.7425	11.92	8.0625	4.775	4.79	5.3225	2.5475	2.4325	2.7025	3.025	2.3525	2.02	3.33
Solyc01g010140	1.805	Expressed	0	0	0	0	0	0	0	0	0	0	0	0	0	0	0	0	0	0	0.025	0.0275	0	0	0	0	0	0	0	0	0	0	0	0	0	0	0.1325	0.2275	0	0	0	0	0	0	0	0	0	0	0
Solyc01g010150	20.7033	Expressed	13.2633	0.26	0.3075	0.455	1.8875	2.02	2.1375	1.99	4.55	3.6225	3.2625	6.05	7.44	6.065	7.2	10.1575	4.63	0.8225	0.695	1.505	2.8475	2.58	2.865	2.805	4	5.8775	6.275	11.1	12.7375	13.3825	14.91	14.555	5	5.55	1.6425	3.945	9.135	8.8375	8.37	8.3775	6.3825	6.995	5.9175	7.95	9.0475	7.035	7.52
Solyc01g010160	20.7	Expressed	0	0	0	0	0	0	0	0	0.215	0.1275	0.2	1.245	1.225	2.0175	3.7775	10.115	0	0	0	0	0	0	0	0	0.2175	0.38	0.4275	6.7575	8.72	8.8275	10.7725	20.7	0	0	0	0	0	0	0	0	1.41	1.865	2.05	4.12	5.68	5.3075	5.8675
Solyc01g010170	26.3275	Expressed	0	0	0	0	0	0	0	0	0.155	0.1275	0.1075	1.4525	1.9925	2.0975	4.4625	11.7075	0	0	0	0	0	0.03	0	0	0.24	0.4625	0.5425	6.5325	9.72	7.56	16.335	26.3275	0	0	0	0	0	0	0	0.0325	0.995	1.245	1.365	2.675	3.865	4.425	3.615
Solyc01g010180	880.25	Expressed	7.00667	47.14	87.13	71.1475	53.3775	80.8	61.3475	49.355	46.8575	24.9625	18.515	10.485	8.98	5.88	6.5825	4.08	1.08667	27.3825	36.1125	19.71	16.275	19.7575	8.64	9.2525	2.1525	1.2775	2.535	3.5925	1.4975	1.8125	1.6775	1.0575	11.1667	31.75	17.3275	9.1225	6.4425	1.38	1.0275	1.39	1.15	0.7925	0.9725	2.4025	0.99	1.1675	4.15
Solyc01g010190	113.067	Expressed	27.05	56.665	49.7125	59.8925	41.8	28.2425	38.76	35.92	25.095	29.1725	27.965	33.59	29.13	23.14	33.9725	44.9675	38.2933	56.1525	49.2925	33.835	39.4625	20.4925	37.0825	46.41	17.575	19.62	25.0375	30.9025	32.1625	32.865	38.4075	48.0725	15.3333	12.4833	44.8825	35.895	36.07	25.735	27.0825	31.38	32.1975	37.3125	36.5025	30.205	20.58	27.645	34.74
Solyc01g010200	1775.95	Expressed	379.79	258.038	263.825	457.195	482.902	420.558	444.062	527.015	374.168	405.705	398.027	239.845	175.838	160.428	165.44	187.37	493.4	243.175	223.985	363.603	390.812	326.512	345.938	430.73	205.363	175.278	213.148	173.625	100.68	159.465	97.34	140.393	224.54	130.443	251.648	361.587	321.303	317.248	284.272	297.145	150.225	139.485	159.145	126.515	92.785	101	127.635
Solyc01g010210	0.245		0	0	0.025	0	0.0325	0	0	0	0	0	0	0	0	0	0	0.03	0	0.07	0.0525	0	0	0	0	0	0	0.025	0	0	0	0.025	0.0275	0.0125	0	0	0	0.0225	0.0325	0.02	0	0	0	0.0275	0.025	0	0.0275	0	0
Solyc01g010220	44.0575	Expressed	4.68	24.9375	14.5875	21.0625	9.2125	11.2125	12.7125	12.2225	9.5525	9.215	9.2025	6.9225	7.9925	7.1025	7.58	7.045	3.36667	25.815	17.605	11.4575	15.48	10.635	16.1375	11.9075	6.985	5.965	7.555	6.055	5.165	7.11	4.7225	5.3275	0.906667	1.90667	19.805	7.64	11.15	6.76	6.5425	7.1825	2.8	2.2775	2.1275	3.72	2.8675	2.6525	2.8825
Solyc01g010230	218.53	Expressed	18.17	34.3375	26.6525	67.09	75.9625	65.005	60.865	75.1725	63.8475	53.9125	48.8325	36.67	29.825	26.9425	39.7575	89.655	10.0867	37.55	31.3575	48.6625	52.5925	57.4875	68.18	56.8175	22.69	26.02	25.7475	38.8475	25.475	36.9475	35.615	82.0175	2.01333	0.863333	22.08	32.5575	31.5125	23.7025	21.15	22.5925	13.155	11.76	9.5375	16.42	12.1975	15.2775	25.5625
Solyc01g010240	0.04		0.04	0	0	0	0	0	0	0	0	0	0	0	0	0	0	0	0	0	0	0	0	0	0	0	0	0	0	0	0	0	0	0	0	0	0	0	0	0	0	0	0	0	0	0	0	0	0
Solyc01g010250	104.69	Expressed	10.9233	21.55	11.7125	6.4525	8.955	10.31	10.5	11.22	28.005	27.0825	26.2575	25.505	25.3875	22.9	21.555	19.41	37.02	16.105	10.385	2.8825	8.375	15.8625	13.5775	14.05	44.88	42.96	46.315	26.54	25.7825	25.9775	21.98	25.0475	26.15	8.92	6.535	7.3075	16.6325	30.3875	24.96	22.6675	92.99	92.0875	104.69	93.535	95.005	81.4875	82.4325
Solyc01g010260	12.3733	Expressed	8.77	0.11	0.025	0.12	0.1825	0.1275	0.15	0.1425	0.0725	0.34	0.2625	0.0225	0.045	0.045	0.06	0.08	8.42667	0.1	0.0475	0.05	0.025	0	0.1575	0.1475	0.035	0.015	0.02	0.02	0	0	0	0.065	4.48667	2.89333	0.0175	0.0725	0	0.0725	0.0225	0.0675	0	0	0.1025	0.065	0.23	0	0.02
Solyc01g010270	627.85	Expressed	108.563	198.175	214.07	323.043	276.93	264.233	292.103	281.892	152.907	153.5	138.452	66.6375	53.5125	50.7	57.515	63.1825	143.437	158.817	181.572	178.012	237.86	290.303	266.397	325.17	101.495	79.355	96.0775	61.05	63.0475	62.5575	69.235	69.56	48.2133	52.9533	60.925	87.5225	125.112	99.69	84.4	113.19	49.0675	40.3225	36.0825	46.3825	35.0375	37.6175	46.5275
Solyc01g010280	0.523333		0.03	0.0425	0.1225	0.0975	0	0	0	0	0.0275	0	0	0	0	0	0	0	0	0.13	0.0475	0.05	0.025	0	0.0325	0	0	0.015	0	0.02	0.055	0	0	0	0.393333	0.0666667	0.1675	0.05	0.0625	0.045	0	0	0	0	0	0	0	0	0.025
Solyc01g010290	53.3775	Expressed	8.98333	20.1	18.6225	29.3875	23.925	19.635	18.525	22.4925	19.4325	19.685	17.675	16.4275	13.595	12.1325	10.355	8.46	21	21.935	18.54	24.655	23.595	17.7025	15.2725	16.3	16.2125	16.985	16.635	17.15	14.165	16.2275	11.89	11.2725	15.3867	3.41333	25.4325	25.3225	21.515	23.1975	23.2525	21.8225	20.195	21.8625	21.04	14.83	14.875	13.96	15.1875
Solyc01g010300	38.44	Expressed	0	0.0225	0	0	0	0	0	0	0	0	0	0	0	0	0	0	0	0.1775	0	0	0	0	0	0	0	0	0	0	0	0	0	0	0.0233333	0	0	0	0	0	0	0	0	0	0	0	0	0	0
Solyc01g010310	145.85	Expressed	5.09667	92.595	82.3775	125.832	53.7125	34.0975	37.46	43.75	14.305	16.13	18.13	8.5525	7.2	7.535	2.8325	0.4625	14.0333	103.832	112.09	92.2025	66.535	31.86	37.2375	33.2875	17.97	16.0725	18.065	4.4125	2.4525	3.01	0.7875	0.4925	2.09667	16.0267	111.562	71.3775	40.73	15.53	15.5975	15.055	2.465	2.615	2.7775	0.88	0.6625	0.625	0.475
Solyc01g010320	0.0325		0	0	0.03	0.0275	0	0	0	0	0	0	0	0	0	0	0	0	0	0	0	0	0	0	0	0	0	0	0	0	0	0	0	0	0	0	0	0	0	0	0	0	0	0.025	0	0	0	0	0
Solyc01g010330	0.133333		0.133333	0	0	0	0	0	0	0	0	0	0	0	0	0	0	0	0.103333	0	0	0	0	0	0	0	0	0	0	0	0	0	0	0	0	0	0	0	0	0	0	0	0	0	0	0	0	0	0
Solyc01g010340	0.355		0.116667	0.3425	0.1625	0.0275	0.0325	0	0	0.0275	0.05	0.0325	0.075	0.0225	0.05	0.1675	0	0.03	0.29	0.3225	0.1425	0.13	0	0	0.0675	0	0	0	0	0.02	0	0	0.03	0.0775	0	0	0.355	0.045	0	0	0	0	0	0.2275	0.03	0.0225	0.065	0.04	0.075
Solyc01g010350	7.75333	Expressed	0	0	0.025	0.4175	0.0625	0.0225	0.125	0.145	0	0.0325	0.03	0	0	0	0	0	0	0	0.06	0.1875	0.07	0	0.0325	0.035	0	0	0	0	0	0	0	0	0	0	0.3275	0.5475	0.0325	0	0	0.0475	0	0	0	0	0	0	0
Solyc01g010360	10.4833	Expressed	0.236667	0	0	3.76	1.5325	1.1	0.945	0.9675	0.565	0.76	0.6075	0.365	0.255	0.405	0.255	0.1375	5.77	0	0	0.1825	0.9225	0.7175	1.135	0.435	0.54	0.705	0.27	0.1625	0.6075	0.29	0.205	0	0	0	0.05	0.3525	1.75	0.465	0.645	0.3075	0.15	0.12	0.1025	0.1075	0.07	0.09	0.0175
Solyc01g010370	29.7667	Expressed	9.82	16.5	11.1775	7.6325	6.6475	6.3075	7.7875	5.915	5.0925	4.995	4.53	2.4725	1.665	1.6525	1.2875	1.05	15.6567	15.2975	9.0225	8.765	5.375	5.3275	5.22	4.475	4.03	2.63	3.1875	1.085	1.0425	1.455	0.92	0.9475	9.30333	17.2567	4.4875	4.2725	2.4325	2.4225	2.88	2.405	0.5025	0.6175	0.78	0.5475	0.4775	0.6025	0.33
Solyc01g010380	0.03		0	0	0	0	0	0	0	0	0	0	0	0	0	0	0	0	0	0	0	0	0	0	0	0	0	0	0	0.02	0	0	0	0	0	0	0	0	0	0	0	0	0	0	0	0	0	0	0
Solyc01g010390	280.747	Expressed	2.46333	13.6525	13.725	9.7625	5.6175	4.9	4.325	4.915	4.0375	4.27	3.295	1.6975	1.6575	1.1775	1.015	1.365	20.6067	22.595	22.1625	15.9675	5.47	5.1075	3.75	5.815	2.7925	2.7275	4.685	1.2325	1.4	1.9575	0.805	1.49	1.07	1.21333	42.2625	34.4725	22.665	8.7	14.5525	11.5625	3.02	4.805	3.365	1.86	1.355	0.98	0.8125
Solyc01g010400	0.03		0	0	0	0	0	0	0	0	0	0	0	0	0	0	0	0	0	0	0	0	0	0	0	0	0	0	0	0	0	0	0	0	0	0	0	0	0	0	0	0	0	0	0	0	0	0	0
Solyc01g010410	19.3567	Expressed	1.05333	0.075	0.285	0.975	4.5125	7.985	7.43	4.6775	10.6075	10.45	8.9	7.3575	6.3475	4.685	4.2175	2.1975	0.693333	0.2325	0.4425	2.3325	4.6675	9.405	7.4275	5.6725	13.1475	11.3875	9.3875	5.275	3.6925	3.2875	4.48	2.93	0.293333	0.47	0.71	3.6925	8.005	15.125	16.815	10.29	5.8975	5.11	6.285	2.9425	3.4925	2.9625	3.225
Solyc01g010420	2.28	Expressed	0	0	0	0.0225	0.0325	0.14	0	0	0.4275	0.1225	0.105	0.32	0.31	0.095	0.3125	0.0825	0	0	0	0.135	0.025	0.0875	0.0275	0.0575	0.025	0.07	0	0.13	0.115	0.2425	0.055	0.06	0	0	0.09	0.0725	0.1625	0.235	0.1875	0.2025	0.0775	0.0275	0.0825	0.02	0.065	0	0.0175
Solyc01g010430	140.333	Expressed	15.6667	5.8175	6.3225	6.7825	11.0675	46.5975	20.9725	11.6975	60.875	26.3175	15.5475	36.1725	21.3675	12.5225	19.15	23.04	9.98	17.3925	7.1	6.0275	13.3825	41.37	18.015	11.7025	31.49	16.6425	13.3075	22.6225	15.475	15.1825	21.3875	18.915	5.89667	3.63667	27.6075	20.2375	23.535	39.95	24.16	16.2175	18.525	10.115	8.5225	9.4775	5.445	4.905	7.885
Solyc01g010440	380.515	Expressed	164.243	80.705	75.7275	78.9225	91.105	94.965	94.8625	93.135	85.365	91.335	92.47	68.85	66.185	57.46	52.84	68.4875	89.25	90.7275	74.345	91.18	125.987	109.665	125.047	107.757	82.2725	77.39	82.2275	53.4775	57.145	51.475	56.59	72.89	117.26	50.4633	72.055	113.695	96.21	76.845	80.205	94.0925	76.3	85.68	79.8075	71.0375	68.08	72.9425	72.35
Solyc01g010450	0.045		0	0	0	0	0	0	0	0	0	0	0	0	0	0	0	0	0	0	0	0	0	0	0	0	0	0	0	0	0	0	0	0	0	0	0	0	0	0	0	0	0	0	0	0	0	0	0
Solyc01g010460	7.4	Expressed	0	3.93	3.6575	3.225	7.4	5.7325	6.1475	6.1175	5.5275	6.6275	6.46	4.8825	4.0425	4.165	4.145	3.5025	0.0333333	4.02	2.495	6.4775	4.8075	4.36	3.715	6.0075	5.0775	4.1025	5.425	3.4525	4.1575	3.4375	3.8625	4.79	0.0233333	0.0366667	3.44	7.3375	4.6675	4.0875	5.1925	5.2575	2.6675	2.0825	2.5075	2.365	2.0825	1.985	2.6075
Solyc01g010470	36.8733	Expressed	23.07	6.7225	4.5275	6.0325	5.4825	4.4975	5.11	5.6	4.64	5.425	5.1275	2.76	2.9375	3.0775	2.8975	2.815	36.8733	6.8425	3.7	5.16	4.7325	3.705	2.91	4.265	2.7525	2.2825	2.655	2.165	2.3675	2.6775	2.3	2.49	12.5533	7.77333	5.2925	5.3875	3.85	3.985	3.9225	4.56	1.485	1.49	1.995	1.9525	2.44	1.8725	1.7775
Solyc01g010480	312.937	Expressed	3.41667	0.3825	0.4325	27.235	100.032	84.18	105.013	109.722	133.29	161.215	163.88	111.733	101.427	104.047	69.5125	54.7875	18.8567	0.3275	0.2125	7.8075	43.355	62.3025	64.6075	99.1875	126.725	121.7	150.857	64.9475	55.4425	65.645	46.055	36.1425	2.80667	0.316667	2.2225	28.5625	67.1025	84.7425	88.8825	86.115	14.0575	17.05	18.8375	11.57	8.3675	8.31	6.625
Solyc01g010490	56.3875	Expressed	0	0.0425	0	0.0775	2.52	4.7725	5.8825	6.68	32.115	37.295	39.19	41.0675	34.9825	34.545	29.995	23.1625	0	0.0275	0.025	0.42	2.33	4.4125	7.64	10.0775	42.03	48.1	56.3875	35.1025	29.4	31.66	29.9825	29.6775	0.14	0	0.5575	3.425	15.6	38.27	36.435	31.905	24.0675	22.94	24.34	25.125	21.9875	24.09	27.35
Solyc01g010500	0.0325		0	0	0	0.025	0.025	0	0.0225	0	0	0	0	0	0	0	0	0	0	0	0.0275	0	0	0	0	0	0	0	0	0	0	0	0	0	0	0	0	0	0.0325	0	0	0	0	0	0	0	0	0	0
Solyc01g010510	2.855	Expressed	0.55	2.5375	2.0325	1.605	1.9525	1.7025	1.58	1.8325	1.975	1.6925	2	1.205	1.3375	0.78	1.1475	1.5075	2.02	2.2475	1.525	1.865	1.4025	1.695	1.465	1.835	1.45	1.38	1.7975	0.9325	1.01	0.73	1.135	1.705	1.1	2.50333	1.625	1.85	1.28	1.465	1.3825	1.4925	0.98	1.095	1.4925	0.8975	1.25	0.925	1.05
Solyc01g010520	54.17	Expressed	39.4533	32.01	30.485	28.5425	21.215	16.2075	21.54	18.8725	10.25	9.985	8.85	1.6825	1.895	0.6975	0.6475	0.35	54.17	28.27	21.54	17.66	15.1875	12.5425	9.845	11.515	3.805	2.5525	3.095	0.3725	0.2975	0.24	0.2	0.27	9.75333	4.39667	13.44	11.875	7.1675	4.0425	4.3175	4.9675	0.4025	0.6225	0.585	0.075	0.19	0.1275	0.0575
Solyc01g010530	0.0625		0	0	0	0	0	0	0	0	0	0	0	0	0	0	0	0	0	0	0	0	0	0	0	0	0	0	0	0	0	0	0	0	0	0	0.025	0	0	0	0	0.0225	0	0	0	0	0	0	0
Solyc01g010540	705.99	Expressed	187.753	373.34	324.07	421.777	216.25	177.903	183.245	179.96	177.215	166.185	174.782	96.3175	116.767	102.543	112.517	120.683	116.65	411.995	418.62	277.06	296.822	157.215	255.775	167.572	123.7	108.957	131.395	79.92	77.855	76.2775	74.6925	86.585	106.187	245.07	291.493	236.055	224.83	150.555	140.032	149.183	111.998	133.947	114.838	129.725	121.61	103.177	109.815
Solyc01g010550	0.0733333		0	0	0	0	0	0	0	0	0	0	0	0	0	0	0	0	0	0	0	0	0	0	0	0	0	0	0	0	0	0	0	0	0	0	0	0	0	0	0	0	0	0	0	0	0	0	0
Solyc01g010570	140.33	Expressed	46.12	27.6425	19.0075	46.0075	43.88	40.8225	39.6875	34.9125	39.18	40.575	37.6325	38.0075	26.51	24.815	25.82	30.7975	38.3133	25.805	18.6275	31.5725	33.1775	30.1325	29.6075	33.495	30.24	24.0125	27.385	26.945	23.4375	24.025	25.905	31.78	20.6133	10.9767	23.2775	46.5725	35.6125	31.9975	28.3725	34.71	30.215	27.555	23.5575	29.3025	24.4075	26.6875	35.495
Solyc01g010580	977.89	Expressed	586.57	399.603	378.395	605.347	435.863	393.478	399.298	360.832	333.577	314.16	314.605	175.32	194.645	164.835	176.438	173.03	282.457	447.48	518.337	518.528	687.255	392.548	542.2	384.57	252.545	215.387	269.69	127.31	120.828	119.058	120.022	118.278	145.057	631.563	348.553	440.34	454.91	324.325	281.295	321.452	181.66	187.273	166.447	205.407	188.463	161.083	194.463
Solyc01g010590	44.82	Expressed	13.2833	37.4025	28.5825	34.31	38.3	33.6675	34.72	41.84	34.43	35.3675	37.505	23.36	21.8975	20.2975	22.355	28.8675	7.53	31.8125	26.7975	27.165	32.99	34.9575	35.3375	35.5425	32.7275	32.84	29.365	24.2425	24.7525	23.3175	24.59	27.5825	11.5	6.88667	30.4925	29.6125	33.0325	34.1975	32.83	32.4625	19.215	19.22	19.5225	22.005	17.8425	17.7575	20.035
Solyc01g010600	35.1333	Expressed	35.1333	0.4025	0.025	0.0525	0.0275	0.0225	0.0225	0	0	0	0	0	0	0	0	0	5.47333	0.28	0	0	0	0	0	0	0	0	0	0	0	0	0	0	0.33	0	0	0.0275	0	0	0	0	0	0	0	0	0	0	0
Solyc01g010610	4.1225	Expressed	0	0.31	0.9175	1.2225	3.4475	2.76	3.78	2.86	2.1925	3.575	3.43	1.7275	1.5375	1.395	0.5975	0.6475	0	0.5925	0.6675	2.75	1.5	2.11	1.72	1.9225	0.635	1.3875	1.4875	0.9225	0.665	0.92	0.4875	0.7875	0	0	0.6925	0.9775	1.855	1.555	1.7075	1.6575	0.515	0.4125	0.3125	0.245	0.32	0.27	0.255
Solyc01g010630	1.06	Expressed	0	0.02	0.025	0.075	0	0.03	0.08	0.0825	0.16	0.2225	0.1775	0.07	0.0225	0.1275	0.2175	0.2025	0	0	0	0.13	0.0525	0.09	0.0575	0	0.035	0.0675	0	0.04	0.02	0.0425	0.08	0.0625	0.0566667	0	0	0.0575	0	0	0.145	0	0.075	1.06	0.1275	0.2875	0.1225	0.2225	0.105
Solyc01g010640	268.29	Expressed	16.2567	7.7225	11.085	15.2175	11.08	12.815	12.32	10.515	14.4375	17.3575	17.875	35.7825	52.0575	56.55	72.585	64.4175	7.05	7.2725	15.295	10.0075	9.705	9.185	12.1575	10.3875	12.1275	15.1475	16.005	40.54	50.33	51.155	56.255	50.3725	10.0833	6.53333	17.5575	11.4	15.245	11.315	9.4375	12.9475	23.9	24.3075	20.635	37.96	42.0275	45.75	51.42
Solyc01g010650	330.347	Expressed	162.647	27.7325	28.33	47.0775	43.6275	46.82	48.24	50.67	43.8325	46.65	48.0525	40.2475	43.4575	48.5925	38.86	34.16	131.023	28.71	27.215	44.485	65.88	61.2725	79.54	64.34	41.5275	43.92	47.0475	35.7375	33.715	37.3925	26.42	30.845	188.23	34.2667	34.49	48.825	57.1575	55.74	57.19	58.7625	35.9925	41.1025	44.5225	36.995	42.66	36.9275	32.735
Solyc01g010660	44.52	Expressed	9.82	21.785	18.5325	17.79	13.89	21.6825	12.97	13.3175	19.92	12.8025	12.9975	13.815	12.4125	11.6225	12.745	16.4375	5.10333	17.5325	14.15	13.55	10.21	14.0375	12.105	8.4725	11.4775	7.7325	7.92	11.54	9.515	11.465	9.94	14.115	14.5933	1.35333	7.02	7.1525	5.11	8.645	5.8075	4.23	9.0625	6.5525	6.0775	9.4775	9.2075	8.2025	8.8
Solyc01g010670	0.0225		0	0	0	0	0	0	0	0	0	0	0	0	0	0	0	0	0	0	0	0	0	0	0	0	0	0	0	0	0	0	0	0	0	0	0	0	0	0	0	0	0	0	0	0	0	0	0
Solyc01g010680	0.0433333		0	0	0	0	0	0	0	0	0	0	0	0	0.03	0	0	0	0	0	0	0	0	0	0	0	0	0	0	0	0	0	0	0	0.0233333	0	0	0	0	0	0	0	0	0	0	0	0	0	0
Solyc01g010690	0.11		0	0	0	0	0	0	0	0	0	0	0	0	0	0	0	0	0	0	0	0	0	0	0	0	0	0	0	0	0	0	0	0	0	0	0	0	0	0	0	0	0	0	0	0	0	0	0
Solyc01g010700	294.983	Expressed	10.85	17.6025	28.1275	22.11	23.115	24.005	23.66	25	26.31	27.205	28.0025	24.2575	21.5125	23.04	21.4825	28.265	9.95667	22.4525	36.97	34.465	25.0625	22.6175	20.21	23.3375	29.5375	30.99	30.965	22.4075	23.9175	23.3575	24.6125	32.6775	19.23	22.53	36.37	36.8	28.64	22.1675	22.5675	25.0525	28.2675	28.42	32.8275	25.02	31.24	27.29	31.085
Solyc01g010710	42.82	Expressed	0.27	3.91	2.5	3.72	4.56	5.2625	5.94	6.2325	1.295	1.795	1.7	0.1775	0.1875	0.1325	0.0525	0.0525	0	3.3125	2.49	3.605	4.175	2.5125	4.0275	2.965	0.38	0.475	0.6	0.0225	0.02	0	0.0275	0	0	1.96667	1.8025	1.2725	0.48	0.6525	0.42	0.6475	0.075	0.12	0.1075	0.02	0.0625	0.0225	0.0175
Solyc01g010720	0.06		0	0	0.0225	0.0275	0	0	0	0	0.0275	0	0	0	0	0	0	0	0	0	0	0	0	0	0.0325	0.03	0	0	0	0	0	0	0	0	0	0	0	0	0	0.025	0	0	0	0	0	0.0225	0	0	0.02
Solyc01g010730	0.02		0	0	0	0	0	0	0	0	0	0	0	0	0	0	0	0	0	0	0	0	0	0	0	0	0	0	0	0	0	0	0	0	0	0	0	0	0	0	0	0	0	0	0	0	0	0	0
Solyc01g010740	0.0825		0	0.0325	0	0	0	0	0	0	0	0.025	0	0	0	0	0.0225	0.03	0	0	0	0.0275	0	0	0	0	0.0325	0.055	0	0	0	0	0	0.0125	0	0	0	0	0	0	0	0.0775	0	0	0	0	0	0	0
Solyc01g010750	879.987	Expressed	191.583	248.428	496.587	506.668	429.118	443.832	459.725	448.562	400.34	408.053	453.41	476.613	554.933	524.393	611.43	490.077	245.487	256.81	643.1	535.83	700.962	547.143	613.305	607.548	565.173	620.505	652.972	541.72	591.317	492.965	590.875	462.955	455.42	61.74	633.462	525.087	592.74	476.017	511.745	515.745	616.128	642.883	581.26	564.232	577.435	561.05	560.852
Solyc01g010760	391.653	Expressed	110.453	137.102	111.347	78.54	46.8325	53.0425	55.2525	57.8975	103.653	94.8925	105.865	146.225	201.62	199.743	195.102	228.655	143.327	162.255	121.175	64.6725	63.5125	45.2	60.7175	50.5475	104.442	106.002	113.595	153.63	155.885	180.458	167.868	195.343	215.317	281.157	113.02	64.5625	65.2675	63.3075	71.87	53.79	87.125	106.007	96.8075	187.032	200.81	184.083	198.982
Solyc01g010770	26.0375	Expressed	14.8767	0.3075	0.1675	7.12	9.7725	8.11	7.04	6.265	10.935	9.9175	6.9175	3.7375	2.4725	1.6125	1.2575	1.5225	12.9433	0.4775	1.2275	7.2125	13.295	19.3075	13.5675	8.4775	16.75	11.7375	10.11	2.65	2.445	1.945	2.3275	1.715	16.47	21.2067	0.5475	10.8575	22.1825	22.155	21.1575	26.0375	7.525	6.4375	7.75	4.7575	4.625	5.36	3.8525
Solyc01g010780	82.59	Expressed	42.1533	46.975	63.17	59.3525	50.97	43.945	51.0875	48.6	41.095	38.6025	42.975	40.4025	44.725	44.2825	42.0825	38.44	28.94	49.4925	57.85	46.96	50.135	57.8425	44.5525	62.28	55.755	54.8125	57.31	40.94	46.41	42.1775	43.05	44.6975	49.62	16.2533	61.1875	57.49	59.9	63.0975	61.435	60.5525	51.9375	58.0025	53.62	51.9325	50.415	45.8925	44.72
Solyc01g010790	0.0425		0	0	0	0	0	0	0	0	0	0	0	0	0	0	0	0	0	0	0	0	0	0	0	0	0	0	0	0.0225	0	0	0	0	0	0	0	0	0	0	0	0	0	0	0	0.0425	0	0	0
Solyc01g010800	1.395	Expressed	0	0.4275	0.5	1.25	0.5025	0.3	0.345	0.2575	0.24	0.265	0.265	0.205	0.35	0.105	0.1925	0.16	0.0333333	0.315	0.335	0.39	0.3775	0.51	0.2625	0.345	0.3875	0.125	0.2475	0.21	0.1175	0.2975	0.26	0.1375	0.0233333	0	0.215	0.185	0.29	0.13	0.39	0.485	0.335	0.3525	0.33	0.3775	0.4125	0.4825	0.41
Solyc01g010810	51.82	Expressed	11.6633	13.6325	14.535	18.8525	16.7675	13.6475	14.5125	14.9575	14.7775	13.63	14.0175	10.93	11.295	11.94	11.8525	14.09	14.04	14.415	14.595	14.7925	17.015	13.1175	15.4825	15.7375	13.68	12.335	13.7475	10.36	9.2225	10.745	9.1025	13.3725	18.9267	16.5733	12.2225	13.215	13.175	11.5525	10.2025	11.6725	8.7775	9.9475	9.8075	10.695	11.6375	8.6975	11.6125
Solyc01g010820	44.5475	Expressed	2.93667	20.615	24.15	18.985	29.4025	33.2625	32.1525	35.6075	33.045	35.7875	39.61	25.655	29.7275	30.425	22.8375	25.73	3.57	24.465	28.2825	34.5925	34.9325	29.5125	32.35	27.3325	27.81	30.2475	29.7725	22.73	20.24	22.7875	17.1775	19.6275	4.9	1.88667	22.4775	32.9975	31.41	26.535	32.625	26.305	18.0375	19.415	22.33	19.9	18.36	18.835	18.2475
Solyc01g010830	54.55	Expressed	36.6633	28.53	23.54	31.4125	26.2925	24.9625	23.4275	25.31	31.0925	33.185	33.915	36.8925	31.4975	33.73	33.55	33.54	41.22	27.2025	21.895	24.6575	21.77	19.4675	17.7425	22.925	31.825	32.005	32.3775	31.9325	25.3925	35.045	29.2325	31.2575	48.3367	16.5467	21.53	22.125	24.035	26.1875	25.295	23.2775	30.0625	29.5225	28.415	31.8425	27.5875	25.99	31.93
Solyc01g010840	0.1525		0	0	0	0.025	0	0	0	0	0	0	0	0	0	0	0	0	0	0.0425	0	0	0	0	0	0	0	0	0	0	0	0	0	0	0	0	0	0	0	0	0	0	0	0	0	0	0	0	0
Solyc01g010850	0.0225		0	0	0	0	0	0	0	0	0	0	0	0	0	0	0	0	0	0	0	0	0	0	0	0	0	0	0	0	0	0	0	0	0	0	0	0	0	0	0	0	0	0	0	0	0	0	0
Solyc01g010860	41.42	Expressed	8.05	7.495	8.6725	15.86	12.0075	12.01	12.6275	14.9775	10.8275	13.5875	13.945	13.1175	11.49	12.93	14.17	16.07	10.91	6.3825	8.2375	11.2075	11.38	12.555	11.76	13.3475	9.735	12.1425	13.415	13.3975	12.7225	13.655	12.9575	19.5325	5.79333	6.76	8.5075	10.585	13.57	14.165	16.71	14.5725	13.16	14.7875	14.345	11.075	12.75	13.175	14.2525
Solyc01g010870	271.205	Expressed	7.02667	40.3775	48.295	39.915	65.3825	77.6425	78.4525	73.185	174.248	172.683	167.92	201.135	192.705	188.792	156.333	191.595	3.96667	45.7325	41.09	45.865	58.0575	80.54	75.225	91.1925	250.972	271.205	267.077	199.438	203.295	181.76	175.795	207.375	6.14333	4.37	52.425	63.835	73.795	130.9	140.855	114.017	139.347	150.127	158.433	126.968	129.635	124.972	127.362
Solyc01g010880	13.3275	Expressed	0.94	8.11	7.53	9.21	7.935	13.3275	8.06	6.1375	10.9375	7.2525	6.49	4.795	5.66	4.1875	4.09	4.16	0.786667	9.38	7.16	6.5425	6.7875	8.96	7.885	6.96	6.505	5.5175	5.2975	5.615	4.625	4.7825	3.5125	3.2475	1.54	0.446667	7.375	6.175	4.805	6.78	5.1	3.9775	5.265	2.79	3.3925	3.585	2.8	2.3875	2.7775
Solyc01g010890	0.246667		0	0.045	0	0	0	0	0	0	0	0	0	0	0	0	0	0.03	0	0.05	0	0	0	0	0	0	0	0	0	0	0	0	0	0	0	0	0	0	0	0	0	0	0	0	0	0	0	0	0
Solyc01g010900	0.0333333		0	0	0	0	0	0	0	0	0	0	0	0	0	0	0	0	0.0333333	0	0	0	0	0	0	0	0	0	0	0	0	0	0	0	0	0	0	0	0	0	0	0	0	0	0	0	0	0	0
Solyc01g010910	0.2925		0	0.04	0.025	0	0	0	0	0	0	0	0	0	0	0	0	0	0.03	0.2925	0	0	0	0	0	0	0	0	0	0	0	0	0	0	0	0	0	0	0	0	0	0	0	0	0	0	0	0	0
Solyc01g010920	14.3967	Expressed	3.68667	5.31	2.575	3.9975	1.115	0.99	1.34	1.685	0.85	0.8025	1.2075	0.6325	0.5275	0.6025	0.5075	0.5775	14.3967	4.4725	1.8475	1.465	0.665	1.2625	0.7125	1.1325	0.88	0.615	0.7125	0.385	0.4675	0.3975	0.2825	0.3325	2.15667	3.24667	2.09	0.935	0.94	1.0775	0.76	1.35	0.405	0.27	0.2625	0.2475	0.3175	0.13	0.255
Solyc01g010930	1.835	Expressed	0.806667	1.485	1.075	0.6825	0.8425	1.2825	1.2525	1.6625	1.235	1.4425	1.1725	0.6625	0.8575	0.79	0.615	0.6775	0.03	1.105	0.7725	1.415	0.8175	1.04	0.93	0.7675	0.9025	0.83	0.63	0.4375	0.2575	0.5825	0.1575	0.3925	0.116667	0.0833333	0.6825	1.435	0.975	1.3775	1.175	0.7775	0.52	0.63	0.56	0.1825	0.6675	0.52	0.21
Solyc01g010940	57.88	Expressed	37.1167	39.6175	27.6725	25.65	20.5375	18.1125	22.0875	20.8625	26.165	24.1975	26.28	26.5225	27.66	25.5275	27.695	32.19	32.2167	34.5075	19.2275	13.25	14.5525	14.485	15.56	16.1875	21.7325	23.225	23.2175	29.665	29.63	34.6425	27.695	29.64	14.6633	14.3333	16.7725	16.68	16.7425	26.995	27.385	22.495	36.03	34.95	34.68	35.0725	34.0175	31.25	29.145
Solyc01g010950	38.605	Expressed	9.22333	16.505	16.3175	19.195	18.0575	16.995	20.145	20.0525	20.895	21.055	19.95	25.4575	23.975	24.0275	24.495	29.36	9.54	18.515	17.2275	17.645	15.295	17.9825	14.9425	20.065	22.3725	24.8825	23.79	28.08	29.8125	28.0675	30.0925	38.605	29.29	6.25667	19.055	20.1	17.525	23.585	23.235	21.07	25.1775	24.61	26.6025	29.2125	29.09	27.51	30.19
Solyc01g010960	0.0675		0	0	0	0	0.0275	0	0	0	0	0	0	0	0.0225	0	0	0	0	0	0.0575	0	0	0	0	0	0	0	0	0	0	0	0	0	0	0	0	0	0	0	0	0	0	0	0	0	0.0325	0	0.02
Solyc01g010970	15.19	Expressed	8.52333	0.35	0.0775	0.0725	0	0.085	0.1775	0.23	0.315	0.495	0.6225	0.5675	0.3825	0.42	0.515	1.1375	13.21	0.3625	0.35	0.3525	0.205	0.1475	0.2925	0.215	0.18	0.27	0.245	0.345	0.5775	0.5475	0.8125	1.2025	15.19	0.34	0.105	0.5575	0.16	0.475	0.31	0.6425	0.515	0.2625	0.16	0.3525	0.6075	0.43	0.64
Solyc01g010980	11.9275	Expressed	0.0833333	5.3175	11.245	7.365	5.5075	2.6075	3.6825	2.5475	1.49	1.61	1.0375	0.3525	0.245	0.1675	0.055	0.1975	0.0966667	4.8675	11.3	5.8125	3.735	3.3625	2.4725	4.885	1.4375	0.83	1.4375	0.1275	0.185	0.08	0.05	0.07	0.0533333	0.166667	5.6625	4.1125	1.71	0.695	0.4875	1.2175	0.0875	0.12	0.05	0	0	0.045	0.02
Solyc01g010990	11.1575	Expressed	2.71	2.665	3.1	4.3175	7.6775	9.1725	9.5525	8.5375	9.345	10.995	9.215	5.99	5.86	6.1325	5.1925	5.1425	1.21333	3.3875	3.3325	11.1575	5.73	8.305	8.1625	6.5275	7.6775	6.4375	5.1775	4.9	4.28	4.9375	2.7775	5.82	2.50667	1.14	3.04	5.175	5.625	8.5875	8.4075	6.7675	4.39	4.0175	5.5125	3.6075	5.2875	3.49	3.8925
Solyc01g011000	261.97	Expressed	69.4	229.25	163.822	187.25	138.238	133.855	137.938	141.923	199.757	191.795	210.255	132.403	170.295	164.127	162.102	191.697	74.6833	208.42	184.822	139.553	133.498	152.553	141.507	142.07	216.735	205.155	218.407	167.042	159.298	180.988	140.812	194.338	41.6867	50.9867	156.825	136.85	118.25	109.745	99.8975	92.9375	158.19	174.643	182.442	210.235	208.705	180.735	202.295
Solyc01g011010	3.975	Expressed	0.94	0.9	0.415	0.65	1.84	1.3225	1.7175	1.7975	1.4175	1.435	2.55	1.3125	0.745	1.36	2.025	2.12	0.396667	0.685	0.375	1.035	1.31	1.2425	1.2475	2.0225	0.765	1.03	0.8875	0.785	0.85	1.1425	0.8875	1.97	0.28	0.436667	0.36	0.4275	1.04	1.375	1.8275	0.91	1.2775	1.46	1.435	0.8125	1.54	1.1925	1.1275
Solyc01g011020	0.0466667		0	0	0	0	0	0	0	0	0	0	0	0	0	0	0	0	0	0	0	0	0	0	0	0	0	0	0	0	0	0	0	0	0	0	0	0.03	0	0	0	0	0	0	0	0	0	0	0
Solyc01g011030	120.537	Expressed	34.0167	10.465	13.155	21.2775	23.92	24.7075	23.455	23.905	22.965	26.4825	28.515	22.63	24.31	23.86	20.65	20.2625	87.41	10.015	14.0325	18.375	23.7	24.48	27.7375	20.81	22.9125	23.16	21.3175	18.7	13.7	17.6975	14.19	16.2275	37.9233	69.18	10	19.96	17.035	16.6175	17.58	16.11	8.5	8.59	8.7	9.6925	8.035	8.86	9.075
Solyc01g011040	109.272	Expressed	34.88	107.17	95.65	87.28	64.7975	67.1275	61.71	73.58	61.1475	62.5975	68.6975	45.06	40.9925	43.76	37.2625	40.4175	63.89	106.77	81.125	66.9375	57.8675	60.49	56.0725	51.32	45.3575	46.95	44.695	38.0875	33.26	40.19	26.4025	34.825	31.1267	40.17	54.4825	44.4925	58.3875	51.965	53.23	49.1575	37.0825	36.85	41.2375	27.48	33.0475	27.4425	25.1375
Solyc01g011050	1.81333	Expressed	0	0.1325	0.105	0.1	0	0	0	0	0.045	0	0	0	0	0.03	0	0	0	0.1275	0.0225	0	0.0325	0	0	0	0	0	0	0	0	0	0	0	1.81333	0	0.035	0.05	0.065	0	0.03	0	0	0	0.03	0	0.0625	0	0
Solyc01g011060	0.2675		0	0.0225	0.025	0	0	0	0	0	0	0	0	0.0225	0	0	0	0.06	0	0	0	0	0	0	0	0	0	0	0	0	0	0	0	0	0	0	0.0175	0	0	0	0	0	0	0	0	0	0	0	0
Solyc01g011070	0.0466667		0	0	0	0	0	0	0	0	0	0	0	0	0	0	0	0	0	0	0	0	0	0	0	0	0	0	0	0	0	0	0	0	0	0	0	0	0	0	0	0	0	0	0	0	0.035	0	0
Solyc01g011080	0.206667		0.206667	0	0	0	0	0	0	0	0	0	0	0	0	0	0	0	0.196667	0	0	0	0	0	0	0	0	0	0	0	0	0	0	0	0	0	0	0	0	0	0	0	0	0	0	0	0	0	0
Solyc01g011090	35.7325	Expressed	0.863333	4.2875	10.0575	6.8575	28.945	35.145	34.96	35.7325	31.8775	33.685	31.5975	30.565	26.175	23	17.31	21.5625	0.593333	6.82	5.7225	19.19	23.26	30.29	19.6875	35.335	29.4075	30.49	29.195	24.3175	24.2225	22.005	24.235	32.9975	0.253333	0.44	6.7075	17.8	16.3925	20.0825	23.09	19.9	14.5525	13.055	16.515	14.5825	16.625	14.78	15.7275
Solyc01g011100	80.545	Expressed	28.1133	39.495	48.1375	47.51	71.0425	73.9375	73.215	76.125	71.87	73.5425	71.4825	65.035	61.6525	57.93	48.195	65.14	32.7533	44.2075	36.77	53.0225	55.94	66.63	49.2125	72.575	65.2425	65.65	63.1625	54.1175	56.8625	52.395	56.3275	80.545	21.4533	8.15	35.41	45.3775	42.52	47.2225	56.405	45.215	36.24	36.3275	39.125	39.3325	38.955	36.2425	43.155
Solyc01g011110	0.025		0	0	0	0	0	0	0	0	0	0	0	0	0	0	0	0	0	0	0	0	0	0	0	0	0	0	0	0	0	0	0	0	0	0	0	0	0	0	0	0	0	0	0.025	0	0	0	0
Solyc01g011130	0.0525		0	0	0	0	0	0	0	0	0	0	0.03	0	0	0	0	0	0	0	0	0	0	0	0	0	0	0	0	0	0.0325	0	0	0	0	0	0	0	0	0	0	0	0	0	0	0	0	0	0
Solyc01g011150	0.025		0	0	0	0	0	0	0	0	0	0	0	0	0	0	0	0	0	0	0	0	0	0	0	0	0	0	0	0	0	0	0	0	0	0	0	0	0	0	0	0	0	0	0	0	0	0	0
Solyc01g011170	0.025		0	0	0	0	0	0	0	0	0	0	0	0	0	0	0	0	0	0	0	0.025	0	0	0	0	0	0	0	0	0	0	0	0	0	0	0	0	0	0	0	0	0	0	0	0	0	0	0
Solyc01g011180	0.43		0	0	0	0	0.025	0.045	0.035	0.0275	0.0275	0.0325	0.13	0	0.0225	0.0225	0.0225	0	0.07	0	0.025	0.0825	0	0	0	0.0325	0	0	0	0	0	0.02	0	0	0	0	0	0.13	0.0625	0.02	0	0	0	0.1875	0	0.0325	0	0.025	0
Solyc01g011190	0.143333		0	0	0	0	0	0	0	0.0275	0	0	0.03	0	0	0	0.03	0	0	0	0	0	0.045	0.03	0	0	0	0	0	0	0	0	0	0	0	0	0	0.055	0	0	0	0	0	0	0	0	0	0.0275	0
Solyc01g011200	7.785	Expressed	3.22667	0.855	0.6525	1.5425	0.7575	0.47	0.9975	0.8475	0.675	0.7025	0.5925	0.765	0.3575	0.3075	0.2875	0.53	0.463333	0.92	0.4225	0.6075	0.445	0.8975	0.4075	0.7575	0.6525	0.5375	0.285	0.45	0.325	0.54	0.335	0.545	0.123333	0.166667	1.0075	1.625	0.705	0.6425	0.57	0.575	0.4675	0.545	0.505	0.425	0.4875	0.325	0.52
Solyc01g011220	4.4175	Expressed	0	0.2475	0.26	0.35	0.29	0.41	0.6425	0.4025	0.3625	0.8825	0.4075	0.5225	0.34	0.095	0.265	0.34	0	0.2775	0.25	0.6325	0.5675	0.455	0.3725	0.545	0.445	0.22	0.39	0.275	0.195	0.3125	0.3125	0.355	0	0	0.5125	1.4125	0.45	0.3425	0.8475	0.405	0.4	0.39	0.305	0.3325	0.5525	0.2275	0.415
Solyc01g011230	2.0925	Expressed	0	0.055	0.1	0.2525	0.255	0.305	0.37	0.14	0.44	0.5575	0.2675	0.1775	0.2025	0.14	0.15	0.1975	0	0.0425	0.185	0.2975	0.0525	0.3025	0.3	0.3625	0.2575	0.165	0.3475	0.1075	0.1475	0.23	0.2325	0.275	0.06	0	0.4725	0.58	0.13	0.32	0.4	0.21	0.1075	0.21	0.195	0.1525	0.3225	0.105	0.1275
Solyc01g011240	0.0325		0	0	0	0	0	0	0	0	0	0	0	0	0	0	0	0	0	0	0	0	0	0	0	0	0	0	0	0	0.0325	0	0	0	0	0	0	0	0	0	0	0	0	0	0	0	0	0	0
Solyc01g011250	0.05		0	0	0	0	0	0	0	0	0	0	0	0	0	0	0	0	0	0	0	0	0	0	0	0	0	0	0	0	0.0325	0	0	0	0	0	0	0	0	0	0	0	0	0	0	0	0	0	0
Solyc01g011260	0.055		0	0	0	0	0	0	0	0	0	0	0	0	0	0	0	0	0	0	0	0	0	0	0	0	0	0	0	0	0	0	0	0	0	0	0	0	0	0	0	0	0	0	0	0	0	0	0
Solyc01g011270	0.035		0	0	0	0	0	0	0	0	0	0	0	0.0225	0	0	0	0	0	0	0	0	0	0.0325	0	0	0	0	0	0	0	0	0	0	0	0	0	0	0	0	0	0	0	0	0	0	0	0	0
Solyc01g011280	0.0425		0	0	0	0	0	0	0	0	0	0	0	0	0	0	0	0	0	0	0	0	0	0	0	0	0	0	0	0	0	0	0	0	0	0	0	0	0	0.02	0	0	0	0	0	0	0	0	0
Solyc01g011290	0.0466667		0	0	0	0	0	0	0	0	0	0	0	0	0	0	0	0	0	0	0	0	0	0	0	0	0	0	0	0	0	0	0	0	0	0	0	0	0	0	0	0	0	0	0	0	0	0	0
Solyc01g011300	0.025		0	0	0	0	0	0	0	0	0	0	0	0	0	0	0	0	0	0	0	0.025	0	0	0	0	0	0	0	0	0	0	0	0	0	0	0	0	0	0	0	0	0	0	0	0	0	0	0
Solyc01g011310	0.0625		0	0	0.025	0	0	0	0	0	0	0	0	0	0	0	0	0	0	0	0	0	0	0	0	0	0	0	0	0	0	0	0	0	0	0	0	0	0	0	0	0	0	0	0	0	0	0	0
Solyc01g011320	0.0625		0	0	0.025	0	0	0	0	0	0	0	0	0	0	0	0	0	0	0	0	0	0	0	0	0	0	0	0	0	0	0	0	0	0	0	0	0	0	0	0	0	0	0	0	0	0	0	0
Solyc01g011330	0.0266667		0	0	0	0	0	0	0	0	0	0	0	0	0	0	0	0	0	0	0	0	0	0	0	0	0	0	0	0	0	0	0	0	0	0	0	0	0	0	0	0	0	0	0	0	0	0	0
Solyc01g011340	89.3933	Expressed	36.85	71.4025	65.68	77.185	57.315	55.4175	58.9275	58.7025	58.205	62.8425	58.2225	46.9825	42.2175	44.1775	44.97	47.095	47.58	71.8825	65.0725	60.32	49.93	55.125	46.0175	66.2225	59.3475	57.42	65.375	44.4375	46.47	52.37	44.0975	48.0875	36.7233	28.8533	59.8175	50.5175	60.255	53.68	53.555	52.965	35.175	38.1175	42.795	35.825	37.715	33.03	38.85
Solyc01g011350	534.55	Expressed	82.4267	183.56	417.27	534.55	437.493	288.255	299.525	298.918	165.12	173.815	167.415	125.188	106.433	106.99	97.425	102.787	96.7933	137.89	287.29	530.732	383.413	306.572	194.505	299.79	136.738	121.862	151.665	101.84	102.545	108.172	104.705	124.028	31.25	17.0067	120.978	220.077	167.925	90.49	83.5175	103.243	71.385	69.3575	68.2775	90.2875	84.065	81.7275	94.195
Solyc01g011370	0.0875		0	0	0	0	0.0325	0	0	0	0	0.0325	0.0225	0.0225	0	0.0275	0	0.03	0	0	0	0.025	0	0.03	0.0325	0	0.0325	0	0	0	0.0275	0	0.03	0	0	0	0.025	0	0	0	0	0	0	0.0325	0	0	0	0	0.0725
Solyc01g011390	0.025		0	0.02	0	0.0225	0	0	0	0	0	0	0	0	0	0	0	0	0	0	0	0	0	0	0	0	0	0	0	0	0	0	0	0	0	0	0	0	0	0	0	0	0	0	0	0	0	0	0
Solyc01g011400	0.2625		0	0	0	0	0	0	0	0	0	0	0	0	0	0	0	0	0	0.02	0	0	0	0	0	0	0	0	0	0	0	0	0	0	0	0	0	0.0825	0	0	0	0	0	0	0	0	0	0	0
Solyc01g011410	12.765	Expressed	0	0.9375	0.15	0.5	0.305	0.085	0.1525	0.055	0.0525	0.065	0.0625	0.1325	0.15	0.08	0.125	0.2775	0	1.525	0.2375	0.3125	0.275	0.0925	0.0625	0.235	0.0925	0.14	0.075	0.0875	0.035	0.0775	0.145	0.16	0	0	0.655	0.2	0.4175	0.3	2.3875	1.1125	0.3125	0.3225	0.34	0	0.1025	0.29	0.0575
Solyc01g011420	1.1975	Expressed	0.163333	0.1725	0.225	0.9125	1.03	0.5275	0.485	0.7875	0.465	0.94	1.065	0.4325	0.495	0.125	0.225	0.5275	0	0.1025	0.075	1.1975	0.5	0.5075	0.57	0.8325	0.4225	0.3775	0.42	0.24	0.1725	0.1925	0.3625	0.2625	0	0	0.13	0.115	0.0975	0.15	0.21	0.285	0.0475	0.08	0.125	0.12	0.07	0.0675	0.085
Solyc01g011430	298.03	Expressed	0.206667	0.0225	0	0	0.08	0.305	0.145	0	0.0525	0.0575	0	0.025	0.045	0.0275	0	0.09	0	0.06	0	0.0775	0.465	1.185	0.465	0.1225	0.1025	0.0825	0.0325	0	0.075	0.075	0.1025	0.195	0	0	0.0175	0.185	2.0625	1.4375	4.3375	4.685	1.665	1.535	0.345	0.15	0.7625	0.685	0.0975
Solyc01g011450	0.4		0	0	0	0	0	0	0	0	0	0	0	0	0	0	0	0	0	0	0	0	0	0	0	0	0	0	0	0	0	0	0	0	0	0	0	0	0	0	0	0	0	0	0	0	0	0	0
Solyc01g011460	0.163333		0	0	0	0	0	0	0	0.0275	0	0	0.03	0	0	0	0	0	0	0.02	0	0	0	0	0	0	0	0	0	0	0	0	0	0	0	0	0	0	0.065	0.025	0.075	0.0625	0.0225	0	0	0	0	0	0
Solyc01g011470	0.025		0	0	0	0	0	0	0	0	0	0	0	0	0	0	0	0	0	0	0	0	0	0	0	0	0	0	0	0	0	0	0	0	0	0	0	0	0	0	0	0	0	0	0	0	0	0	0
Solyc01g011480	0.055		0	0	0.025	0	0	0	0	0	0	0	0	0	0	0	0	0	0	0.02	0	0	0	0	0	0	0	0	0	0	0	0	0	0	0	0.0333333	0.0175	0	0	0	0	0	0	0	0	0	0	0	0
Solyc01g011490	0.38		0	0	0	0	0	0	0	0	0	0	0	0	0	0	0	0	0	0	0	0	0	0	0	0	0	0	0	0	0	0	0	0	0	0	0	0	0	0	0	0	0	0	0	0	0	0	0
Solyc01g011500	0		0	0	0	0	0	0	0	0	0	0	0	0	0	0	0	0	0	0	0	0	0	0	0	0	0	0	0	0	0	0	0	0	0	0	0	0	0	0	0	0	0	0	0	0	0	0	0
Solyc01g011510	23.3075	Expressed	0.483333	9.2025	17.97	18.4775	19.2775	16.8875	17.485	23.3075	14.915	14.905	17.75	21.255	17.41	19.2175	15.6925	22.1875	3.23333	6.65	2.985	4.53	3.8125	3.185	3.1575	2.9	2.255	3.655	4.4275	6.905	6.62	7.915	5.6925	10.4075	0.73	0.863333	2.4725	3.045	2.78	6.7825	6.9025	5.735	1.6975	1.4975	2.12	2.47	2.7725	2.31	3.75
Solyc01g011520	0.02		0	0	0	0	0	0	0	0	0	0	0	0	0	0	0	0	0	0	0	0	0	0	0	0	0	0	0	0	0	0	0	0	0	0	0	0	0	0	0	0	0	0	0	0	0	0	0
Solyc01g011530	0.0275		0	0	0	0	0	0	0	0	0	0	0	0	0	0	0	0	0	0	0	0	0	0	0	0	0	0	0	0	0	0	0	0	0	0	0	0	0	0	0	0	0	0	0.0275	0	0	0	0
Solyc01g011540	0.025		0	0	0	0	0	0	0	0	0	0	0	0	0	0	0	0	0	0	0	0	0	0	0	0	0	0	0	0	0	0	0	0	0	0	0	0	0	0	0	0	0	0	0	0	0	0	0
Solyc01g012540	0.0325		0	0	0	0	0	0	0	0	0	0	0	0	0	0	0	0	0	0	0	0	0	0	0	0	0	0	0	0	0	0	0	0	0	0	0	0	0	0	0	0	0	0	0	0	0	0	0
Solyc01g012550	0		0	0	0	0	0	0	0	0	0	0	0	0	0	0	0	0	0	0	0	0	0	0	0	0	0	0	0	0	0	0	0	0	0	0	0	0	0	0	0	0	0	0	0	0	0	0	0
Solyc01g012560	0.0325		0	0	0	0	0	0	0	0	0	0	0	0	0	0	0	0	0	0.0275	0	0	0	0	0	0	0	0	0	0	0	0	0	0	0	0	0	0	0	0.02	0	0.0325	0	0	0.0275	0	0	0	0
Solyc01g012570	0.0275		0	0	0	0	0	0	0	0	0	0	0	0	0	0	0	0	0	0	0	0.0275	0	0	0	0	0	0	0	0	0	0	0	0	0	0	0	0	0	0	0	0	0	0	0	0	0	0	0
Solyc01g012580	1.9425	Expressed	0.123333	0.055	0.025	0.175	0.8625	0.745	0.755	1.0525	0.9075	1.21	1.035	0.8725	0.9875	1.0425	0.76	1.2375	0	0.04	0.0275	0.6975	1.035	0.875	0.865	0.68	0.655	0.65	0.545	0.85	0.635	0.4975	0.615	0.56	0.0533333	0	0	0.2425	0.49	0.485	0.825	0.28	0.28	0.1825	0.405	0.3	0.4675	0.1325	0.3575
Solyc01g012590	0.025		0	0	0	0	0	0	0	0	0	0	0	0	0	0	0	0	0	0	0	0	0	0	0	0	0	0	0	0	0	0	0	0	0	0	0	0	0	0	0	0	0	0	0	0	0	0	0
Solyc01g012600	0.0225		0	0	0	0	0	0	0	0	0	0	0	0	0	0	0	0	0	0	0	0	0	0	0	0	0	0	0	0	0	0	0	0	0	0	0	0	0	0	0	0	0	0	0	0	0	0	0
Solyc01g012610	0		0	0	0	0	0	0	0	0	0	0	0	0	0	0	0	0	0	0	0	0	0	0	0	0	0	0	0	0	0	0	0	0	0	0	0	0	0	0	0	0	0	0	0	0	0	0	0
Solyc01g012620	0.195		0	0.0225	0	0	0.025	0.0225	0.0325	0.055	0.05	0.065	0.05	0.0925	0.0225	0.0275	0.085	0.0875	0	0	0	0	0	0.06	0	0.03	0.025	0.015	0	0.04	0	0.055	0.05	0.025	0	0	0	0.0225	0.0325	0	0.08	0.0275	0.055	0.18	0.18	0.195	0.035	0.135	0.055
Solyc01g012630	0		0	0	0	0	0	0	0	0	0	0	0	0	0	0	0	0	0	0	0	0	0	0	0	0	0	0	0	0	0	0	0	0	0	0	0	0	0	0	0	0	0	0	0	0	0	0	0
Solyc01g012640	0		0	0	0	0	0	0	0	0	0	0	0	0	0	0	0	0	0	0	0	0	0	0	0	0	0	0	0	0	0	0	0	0	0	0	0	0	0	0	0	0	0	0	0	0	0	0	0
Solyc01g012650	0.0325		0	0	0	0	0.0325	0	0	0	0	0	0	0	0	0.0225	0.03	0.03	0	0	0	0.0275	0	0	0	0	0	0	0	0	0	0	0	0	0	0	0	0.03	0	0	0	0	0	0	0	0	0	0.0275	0
Solyc01g012660	0		0	0	0	0	0	0	0	0	0	0	0	0	0	0	0	0	0	0	0	0	0	0	0	0	0	0	0	0	0	0	0	0	0	0	0	0	0	0	0	0	0	0	0	0	0	0	0
Solyc01g012670	0.03		0	0	0	0	0	0	0	0	0	0	0	0	0	0	0	0	0	0	0	0	0	0	0	0	0	0	0	0	0	0	0	0	0	0	0	0	0	0	0	0	0	0	0	0	0	0	0
Solyc01g012680	0		0	0	0	0	0	0	0	0	0	0	0	0	0	0	0	0	0	0	0	0	0	0	0	0	0	0	0	0	0	0	0	0	0	0	0	0	0	0	0	0	0	0	0	0	0	0	0
Solyc01g012690	0.0433333		0	0	0	0	0	0	0	0	0	0	0	0	0	0	0	0	0	0	0	0	0	0	0	0	0	0	0	0	0	0	0	0	0	0	0	0	0	0	0	0	0	0	0	0	0	0	0
Solyc01g012700	0.1425		0	0.0225	0.0475	0.1025	0.0325	0.0225	0.0225	0.0325	0.0825	0	0	0.0475	0	0.035	0.0525	0.06	0.03	0	0	0.055	0	0	0	0	0	0	0.035	0	0	0.055	0	0	0	0	0	0	0	0	0	0	0	0	0	0	0	0	0.02
Solyc01g012710	0		0	0	0	0	0	0	0	0	0	0	0	0	0	0	0	0	0	0	0	0	0	0	0	0	0	0	0	0	0	0	0	0	0	0	0	0	0	0	0	0	0	0	0	0	0	0	0
Solyc01g012720	0.025		0	0	0	0	0	0	0	0	0	0	0	0	0	0	0	0	0	0	0	0	0	0	0	0	0	0	0	0	0	0	0	0	0	0	0	0	0	0	0	0	0	0	0	0	0	0	0
Solyc01g012730	0		0	0	0	0	0	0	0	0	0	0	0	0	0	0	0	0	0	0	0	0	0	0	0	0	0	0	0	0	0	0	0	0	0	0	0	0	0	0	0	0	0	0	0	0	0	0	0
Solyc01g012740	0		0	0	0	0	0	0	0	0	0	0	0	0	0	0	0	0	0	0	0	0	0	0	0	0	0	0	0	0	0	0	0	0	0	0	0	0	0	0	0	0	0	0	0	0	0	0	0
Solyc01g012750	0.2425		0	0.1025	0.1225	0.15	0.0325	0	0	0	0	0	0.1025	0.07	0.05	0.05	0.1525	0.16	0	0.0475	0.0275	0.08	0.085	0	0	0	0	0	0	0	0.0325	0	0	0	0	0	0.0525	0.0575	0	0.0425	0.0525	0	0	0.0325	0	0	0	0	0
Solyc01g012760	0.11		0.03	0	0	0.0775	0	0	0	0	0	0	0.07	0.0225	0.0225	0.0225	0.0475	0.11	0	0	0	0	0	0.0325	0	0	0	0	0	0	0	0	0	0	0	0	0.05	0	0	0	0	0	0	0.03	0	0	0	0.0175	0
Solyc01g013760	0.0366667		0	0	0.025	0	0	0	0	0	0	0	0	0	0	0	0	0	0	0	0	0	0	0	0	0	0	0	0	0	0	0	0	0	0	0	0	0	0	0	0	0	0	0	0	0	0	0	0
Solyc01g013770	0.025		0	0	0	0	0	0	0	0	0	0	0	0	0	0	0	0	0	0	0	0	0	0	0	0	0	0	0	0	0	0	0	0	0	0	0	0	0	0	0	0	0	0	0	0	0	0	0
Solyc01g013780	0		0	0	0	0	0	0	0	0	0	0	0	0	0	0	0	0	0	0	0	0	0	0	0	0	0	0	0	0	0	0	0	0	0	0	0	0	0	0	0	0	0	0	0	0	0	0	0
Solyc01g013790	0		0	0	0	0	0	0	0	0	0	0	0	0	0	0	0	0	0	0	0	0	0	0	0	0	0	0	0	0	0	0	0	0	0	0	0	0	0	0	0	0	0	0	0	0	0	0	0
Solyc01g013800	0.03		0	0	0	0	0	0	0	0	0	0	0	0	0	0	0	0	0	0	0	0	0	0.03	0	0	0	0	0	0	0	0	0	0	0	0	0	0	0	0	0	0.0275	0	0	0	0	0	0	0
Solyc01g013810	0.155		0	0	0	0	0	0	0	0	0	0	0	0	0	0	0	0	0	0	0	0	0	0	0	0	0	0	0	0	0	0	0	0	0	0	0	0	0	0	0	0	0	0	0	0	0	0	0
Solyc01g013820	0		0	0	0	0	0	0	0	0	0	0	0	0	0	0	0	0	0	0	0	0	0	0	0	0	0	0	0	0	0	0	0	0	0	0	0	0	0	0	0	0	0	0	0	0	0	0	0
Solyc01g013830	0.0275		0	0	0	0	0	0	0	0	0	0	0	0	0	0	0	0	0	0	0	0	0	0	0	0	0	0	0	0	0	0	0	0	0	0	0	0	0	0	0	0	0	0	0	0	0	0	0
Solyc01g013840	0		0	0	0	0	0	0	0	0	0	0	0	0	0	0	0	0	0	0	0	0	0	0	0	0	0	0	0	0	0	0	0	0	0	0	0	0	0	0	0	0	0	0	0	0	0	0	0
Solyc01g013850	0		0	0	0	0	0	0	0	0	0	0	0	0	0	0	0	0	0	0	0	0	0	0	0	0	0	0	0	0	0	0	0	0	0	0	0	0	0	0	0	0	0	0	0	0	0	0	0
Solyc01g013860	0.02		0	0	0	0	0	0	0	0	0	0	0	0	0	0	0	0	0	0	0	0	0	0	0	0	0	0	0	0	0	0	0	0	0	0	0	0	0	0	0	0	0	0	0	0	0	0	0.02
Solyc01g013870	0.025		0	0	0	0	0	0	0	0	0	0	0	0	0	0	0	0	0	0	0	0	0	0	0	0	0	0	0	0	0	0	0	0	0	0	0	0	0	0	0	0	0	0	0	0	0	0	0
Solyc01g013880	0.025		0	0	0	0	0	0	0	0	0	0	0	0	0	0	0	0	0	0	0	0	0	0	0	0	0	0	0	0	0	0	0	0	0	0	0	0	0	0	0	0	0	0	0	0	0	0	0
Solyc01g013890	1.6325	Expressed	0	0.32	0.9375	0.7425	1.1875	1.2	1	1.58	1.135	1.0425	1.1675	1.47	1.4075	1.6325	1.135	1.5125	0	0.185	0.2275	0.35	0.4825	0.39	0.1475	0.1225	0.1275	0.345	0.5425	0.4725	0.26	0.595	0.555	0.6325	0	0	0.1975	0.2575	0.165	0.5575	0.6725	0.315	0.085	0.115	0.2325	0.1725	0.2875	0.1575	0.2125
Solyc01g013900	1.64	Expressed	0.04	0.25	0.245	0.52	0.0525	0	0.0875	0.085	0.0225	0	0.085	0.045	0	0.235	0.195	0.0725	0.19	0.0825	0.0475	0	0	0	0.0325	0	0	0.025	0	0.02	0	0.0425	0.03	0	0.0766667	0	0.0425	0	0.0325	0.025	0	0	0	0.025	0	0.0225	0.0275	0	0
Solyc01g013910	0		0	0	0	0	0	0	0	0	0	0	0	0	0	0	0	0	0	0	0	0	0	0	0	0	0	0	0	0	0	0	0	0	0	0	0	0	0	0	0	0	0	0	0	0	0	0	0
Solyc01g013920	0.0366667		0	0	0	0	0	0	0	0	0	0	0	0	0	0	0	0	0	0	0	0	0	0	0	0	0	0	0	0	0	0	0	0	0	0	0	0	0	0	0	0	0	0	0	0	0	0	0
Solyc01g013930	0		0	0	0	0	0	0	0	0	0	0	0	0	0	0	0	0	0	0	0	0	0	0	0	0	0	0	0	0	0	0	0	0	0	0	0	0	0	0	0	0	0	0	0	0	0	0	0
Solyc01g013940	0.0225		0	0	0	0	0	0	0	0	0	0	0	0	0	0	0	0	0	0	0	0	0	0	0	0	0	0	0	0	0	0	0	0	0	0	0	0	0	0	0	0	0	0	0	0	0	0	0
Solyc01g013950	0		0	0	0	0	0	0	0	0	0	0	0	0	0	0	0	0	0	0	0	0	0	0	0	0	0	0	0	0	0	0	0	0	0	0	0	0	0	0	0	0	0	0	0	0	0	0	0
Solyc01g013960	0		0	0	0	0	0	0	0	0	0	0	0	0	0	0	0	0	0	0	0	0	0	0	0	0	0	0	0	0	0	0	0	0	0	0	0	0	0	0	0	0	0	0	0	0	0	0	0
Solyc01g013970	0		0	0	0	0	0	0	0	0	0	0	0	0	0	0	0	0	0	0	0	0	0	0	0	0	0	0	0	0	0	0	0	0	0	0	0	0	0	0	0	0	0	0	0	0	0	0	0
Solyc01g013980	0.0275		0	0	0	0	0	0	0	0	0	0	0	0	0	0	0	0	0	0	0	0	0	0	0	0	0	0	0	0	0	0	0	0	0	0	0	0	0	0	0	0	0	0	0	0	0	0	0
Solyc01g013990	0		0	0	0	0	0	0	0	0	0	0	0	0	0	0	0	0	0	0	0	0	0	0	0	0	0	0	0	0	0	0	0	0	0	0	0	0	0	0	0	0	0	0	0	0	0	0	0
Solyc01g014000	0.04		0	0	0	0	0	0	0	0	0	0	0	0	0.0225	0	0	0	0	0	0	0	0	0	0	0	0	0	0	0	0	0	0	0	0	0	0	0	0	0	0	0	0.03	0	0	0	0	0	0
Solyc01g014010	0		0	0	0	0	0	0	0	0	0	0	0	0	0	0	0	0	0	0	0	0	0	0	0	0	0	0	0	0	0	0	0	0	0	0	0	0	0	0	0	0	0	0	0	0	0	0	0
Solyc01g014020	0		0	0	0	0	0	0	0	0	0	0	0	0	0	0	0	0	0	0	0	0	0	0	0	0	0	0	0	0	0	0	0	0	0	0	0	0	0	0	0	0	0	0	0	0	0	0	0
Solyc01g014030	0.0225		0	0	0	0	0	0	0	0	0	0	0	0	0	0	0	0	0	0	0	0	0	0	0	0	0	0	0	0	0	0	0	0	0	0	0	0	0	0	0	0	0	0	0	0	0	0	0
Solyc01g014040	0.035		0	0	0	0	0	0	0	0	0	0	0	0	0	0	0	0	0	0.0325	0	0	0	0	0	0	0	0	0	0	0	0	0	0	0	0	0.035	0	0	0	0	0	0	0	0	0	0	0	0
Solyc01g014050	0.0275		0	0	0	0	0	0	0	0	0	0	0	0	0	0	0	0	0	0	0	0	0	0	0	0	0	0	0	0	0	0	0	0	0	0	0	0	0	0	0	0	0	0	0	0	0	0	0
Solyc01g014060	0.0275		0	0	0	0	0	0	0	0	0	0	0	0	0	0	0	0	0	0	0	0	0	0	0	0	0	0	0	0	0	0	0	0	0	0	0	0	0	0	0	0.0275	0	0	0	0	0	0	0
Solyc01g014070	0.06		0	0	0	0.025	0	0	0	0	0	0	0	0	0	0	0	0	0	0	0	0	0	0	0	0	0	0	0	0	0	0	0	0	0	0	0	0	0	0	0	0	0	0	0	0	0	0	0
Solyc01g014080	0.0425		0	0	0	0	0	0	0	0	0.0225	0	0.03	0	0	0.035	0	0	0	0	0	0.0275	0	0	0	0	0	0	0	0	0	0	0	0	0	0	0	0	0	0	0	0	0	0	0.03	0	0.0325	0	0
Solyc01g014090	0.0475		0	0	0	0	0	0	0	0	0	0	0	0	0	0	0	0	0	0	0	0	0	0	0	0.0325	0	0	0	0	0	0	0	0	0	0	0	0	0	0	0	0	0	0	0	0	0	0	0
Solyc01g014100	41.4225	Expressed	0.593333	24.8225	15.5225	9.9725	2.285	1.3275	1.2	1.9225	0.1	0.4475	0.33	0	0	0	0	0	0.953333	37.6	13.305	3.305	1.37	0.325	0.5025	0.5725	0	0.025	0.0425	0	0	0	0	0	7.73	20.2967	10.91	5.66	4.5475	1.7975	1.1525	2.5	0	0	0.03	0	0	0	0
Solyc01g014110	113.277	Expressed	11.0733	3.475	3.3475	6.3375	3.275	2.11	3.175	2.47	0.6825	1.0075	1.135	0.2675	0.4375	0.395	0.355	0.155	34.4133	3.9325	2.9425	3.0975	3.9525	3.34	3.2325	3.335	0.62	0.675	1.0375	0.27	0.27	0.5075	0.075	0.1675	0.103333	1.58333	4.44	3.6925	4.7	2.52	3.28	2.5425	0.2525	0.055	0.1175	0.1075	0	0.12	0.0175
Solyc01g014120	12.6175	Expressed	0.04	1.36	1.505	3.6275	5.6425	3.0475	4.785	5.39	1.0675	2.3425	2.54	0.645	0.82	0.6875	0.465	0.4425	0.236667	2.185	1.955	5.4275	6.28	4.1525	6.8925	5.725	0.94	1.4175	1.225	0.29	0.5025	0.7975	0.2875	0.365	0	0.0333333	2.6975	5.6325	8.1625	4.2525	5.3225	4.645	0.59	0.5975	0.2575	0.1725	0.1275	0.1475	0.16
Solyc01g014130	0.0325		0	0.0225	0	0	0.0325	0	0	0	0	0	0	0	0	0	0	0	0	0	0	0	0	0	0	0	0	0	0	0	0	0	0	0	0	0	0	0	0	0	0	0	0	0	0	0	0	0	0
Solyc01g014140	4.06667	Expressed	0.4	0.415	0.13	0.0225	0	0.0675	0.045	0.0275	0.0825	0.0475	0.045	0	0	0	0	0	0	0.1625	0.05	0.0525	0.0475	0	0	0.06	0	0	0	0	0	0	0	0	0.06	0	0.025	0.03	0	0	0	0.0275	0	0	0	0	0	0	0
Solyc01g014150	0.0525		0	0.02	0	0	0	0	0.0225	0	0	0	0	0	0	0	0	0	0	0	0	0	0	0	0	0	0	0	0	0	0	0	0	0	0	0	0	0	0	0	0	0	0	0	0	0	0	0	0
Solyc01g014160	0.085		0	0	0	0	0	0	0	0	0	0	0	0	0	0	0	0	0	0	0	0	0	0	0	0	0	0	0	0	0	0	0	0	0	0	0	0	0	0	0	0	0	0	0	0	0	0	0
Solyc01g014170	0.025		0	0	0	0	0	0	0	0	0	0	0	0	0	0	0	0	0	0	0	0	0	0	0	0	0	0	0	0	0	0	0	0	0	0	0	0	0	0	0	0	0	0	0	0	0	0	0
Solyc01g014180	1325.78	Expressed	394.58	95.0925	98.5875	249.343	243.632	299.985	280.188	277.688	356.985	339.062	346.965	278.815	310.355	308.467	306.062	288.673	397.927	95.1475	126.935	198.058	374	433.248	477.243	339.665	435.038	421.408	414.23	324.998	292.205	345.71	273.235	276.275	403.143	138.637	123.405	241.06	367.822	540.923	445.92	473.478	405.928	401.08	414.728	530.492	505.413	441.067	473.065
Solyc01g014190	0		0	0	0	0	0	0	0	0	0	0	0	0	0	0	0	0	0	0	0	0	0	0	0	0	0	0	0	0	0	0	0	0	0	0	0	0	0	0	0	0	0	0	0	0	0	0	0
Solyc01g014200	28.6667	Expressed	10.75	2.595	1.64	2.19	0.9525	0.8425	0.51	0.3975	0.4025	0.6675	0.6525	0.16	0.0725	0.215	0	0.0275	8.15667	2.4375	1.8425	1.1575	0.8375	0.715	1.2775	0.9175	0.5975	0.4875	0.2775	0	0.02	0	0.085	0.025	5.23667	7.09667	1.425	1.655	0.905	0.955	0.595	0.88	0.225	0.0475	0.0825	0	0.0625	0.0275	0.0175
Solyc01g014210	0.09		0	0	0	0	0.025	0	0	0	0	0	0	0	0	0	0	0	0	0	0	0	0.0275	0	0	0	0	0	0	0	0	0	0	0	0	0	0	0	0	0	0	0	0	0	0	0	0	0	0
Solyc01g014220	0.565		0	0.3	0.525	0.225	0.3025	0.09	0.1525	0.2375	0.0825	0.1425	0.2075	0.0475	0.045	0.0225	0.0525	0.0875	0	0.195	0.4825	0.4575	0.35	0.0875	0.3025	0.05	0.035	0.0825	0	0	0	0.025	0	0.0575	0	0	0.2575	0.1925	0.0625	0.045	0.275	0.0525	0	0.025	0	0.02	0	0.0175	0.0225
Solyc01g014230	25.2133	Expressed	3.96667	10.22	14.88	15.3975	20.3175	21.7475	22.3	21.8925	20.53	22.395	20.735	17.4125	18.9875	16.93	15.445	16.7125	1.38	10.2575	14.37	18.0025	19.345	19.0125	20.2175	19.8775	19.705	17.1	18.77	16.275	14.55	16.09	13.5575	17.8275	3.23667	0.676667	5.4225	6.7225	3.3325	3.8025	4.9325	4.12	2.585	2.3275	1.7525	3.27	3.5775	3.2325	3.5275
Solyc01g014240	0.025		0	0	0	0	0	0	0	0	0	0	0	0	0	0	0	0	0	0	0	0	0	0	0	0	0	0	0	0	0	0	0	0	0	0	0	0	0	0	0	0	0	0	0	0	0	0	0
Solyc01g014250	74.815	Expressed	1.17667	1.0975	1.7	9.4875	25.9925	11.4425	13.0525	23.7525	28.01	40.4575	49.0725	35.0175	26.2	29.24	32.605	32.49	0.79	1.68	2.5025	15.615	11.7475	15.6625	13.3225	17.6475	31.345	44.1825	48.9375	35.7025	32.955	42.305	39.55	62.2	0.67	0.23	3.99	12.9325	13.05	21.525	25.0325	24.9525	33.2525	33.8825	58.275	24.315	41.4125	35.8775	46.9625
Solyc01g014260	0.0433333		0	0	0	0	0	0	0	0	0	0	0	0	0	0	0.025	0	0	0	0	0	0	0	0	0	0	0	0	0.02	0	0	0	0	0	0	0	0	0	0	0	0	0.0275	0	0	0	0	0	0
Solyc01g014270	37.1925	Expressed	6.78	12.7425	13.9175	37.1925	19.3175	21.2725	20.8275	24.605	23.105	24.35	22.9225	16.035	14.3275	16.245	14.4725	15.86	4.09667	11.035	9.7275	18.565	21.365	17.2575	18.965	14.435	13.8975	13.4675	12.715	10.28	7.6975	11.51	10.3225	11.02	1.20667	1.83	16.7525	15.96	19.855	21.4425	20.65	20.07	10.6075	10.215	10.935	9.69	9.6825	10.1975	12.91
Solyc01g014280	0.07		0	0	0	0	0	0	0	0	0	0	0	0	0	0	0	0	0	0	0	0	0	0	0	0	0	0	0	0	0	0	0	0	0	0	0	0	0	0	0	0	0	0	0	0	0	0	0
Solyc01g014290	0.045		0	0	0	0	0	0	0	0	0	0	0	0	0	0	0	0	0	0	0	0	0	0	0	0	0	0	0	0	0	0	0	0	0	0	0	0	0	0	0	0	0	0	0	0	0	0	0
Solyc01g014300	0.03		0.03	0	0	0	0	0	0	0	0	0	0	0	0	0	0	0	0	0	0	0	0	0	0	0	0	0	0	0	0	0	0	0	0	0	0	0	0	0	0	0	0	0	0	0	0	0	0
Solyc01g014310	0.03		0	0	0	0	0	0	0	0	0	0	0	0	0	0	0	0	0	0	0	0	0	0	0	0	0	0	0	0	0	0	0	0	0	0	0	0	0	0	0	0	0	0	0	0	0	0	0
Solyc01g014320	0.3375		0	0.045	0.1175	0.1525	0.0625	0.175	0.3075	0.3375	0.0275	0.095	0.135	0	0	0	0	0	0	0.02	0	0.025	0	0	0	0	0	0	0	0	0	0	0	0	0	0	0	0	0	0	0	0	0	0	0.025	0	0	0	0
Solyc01g014330	0.0775		0	0.045	0.075	0.0775	0	0	0.0675	0.06	0	0.0325	0.0225	0	0	0	0	0	0	0	0	0.025	0	0	0	0	0	0	0	0	0	0	0	0	0	0	0	0	0	0	0	0	0	0	0	0	0	0	0
Solyc01g014340	0.03		0	0	0	0	0	0	0	0	0	0	0	0	0	0	0	0	0	0	0	0	0	0	0	0	0	0	0	0	0	0	0	0	0	0	0	0	0	0	0	0	0	0	0.025	0	0	0	0
Solyc01g014350	0		0	0	0	0	0	0	0	0	0	0	0	0	0	0	0	0	0	0	0	0	0	0	0	0	0	0	0	0	0	0	0	0	0	0	0	0	0	0	0	0	0	0	0	0	0	0	0
Solyc01g014360	0.145		0	0	0	0	0	0	0	0	0	0	0	0	0	0	0	0	0	0	0	0	0	0	0	0	0	0	0	0	0	0	0	0	0	0	0	0.03	0	0	0	0	0	0	0	0	0	0	0
Solyc01g014370	0.0225		0	0	0	0	0	0	0	0	0	0	0	0	0	0	0	0	0	0	0	0	0	0	0	0	0	0	0	0	0	0	0	0	0	0	0	0	0	0	0	0	0	0	0	0	0	0	0
Solyc01g014380	8.5325	Expressed	0.16	0.3325	0.6225	2.835	5.09	2.29	4.0525	5.3775	1.43	2.4225	2.57	0.7025	0.5375	0.635	0.6275	0.195	0	1.0025	1.0375	3.005	6.52	3.3125	5	4.705	0.8475	1.255	1.42	0.5775	0.185	0.6975	0.455	0.4175	0.0766667	0.0666667	2.3925	3.7975	7.51	3.8025	6.16	6.1475	1.1225	1.94	1.0425	0.46	0.4275	0.64	0.77
Solyc01g014390	2.30333	Expressed	0	0	0	0.125	0.5625	0.3925	0.1925	0.4675	0.68	0.3825	0.4	0.1875	0.0275	0	0.0525	0.08	2.30333	0.0425	0	0.2125	0.1825	0.38	0.24	0.33	0.39	0.285	0.42	0.1925	0.02	0.0525	0.0575	0.025	0.16	0.0366667	0	0	0	0.02	0	0	0	0	0	0	0	0	0
Solyc01g014400	0.04		0	0	0	0	0	0	0	0	0	0	0	0	0	0	0	0	0	0	0	0	0	0	0	0	0	0	0.02	0	0	0	0	0	0	0	0	0	0	0	0	0	0	0	0	0	0	0	0
Solyc01g014410	0.0333333		0	0	0	0	0	0	0	0	0	0	0	0	0	0	0	0	0	0	0	0	0	0	0	0	0	0	0	0	0	0	0	0	0	0	0	0	0	0	0	0	0	0	0	0	0	0	0
Solyc01g014420	0.0325		0	0	0	0	0	0	0	0	0	0	0	0	0	0	0	0	0	0	0	0	0	0	0	0	0	0	0	0	0	0	0	0	0	0	0	0	0	0	0	0	0	0	0	0	0	0	0
Solyc01g014430	0		0	0	0	0	0	0	0	0	0	0	0	0	0	0	0	0	0	0	0	0	0	0	0	0	0	0	0	0	0	0	0	0	0	0	0	0	0	0	0	0	0	0	0	0	0	0	0
Solyc01g014440	0.045		0	0	0	0	0	0	0	0	0	0	0	0	0	0	0	0	0	0	0	0	0	0	0	0	0	0	0	0	0	0	0	0	0	0	0	0	0	0	0	0	0	0	0	0	0	0	0
Solyc01g014450	0		0	0	0	0	0	0	0	0	0	0	0	0	0	0	0	0	0	0	0	0	0	0	0	0	0	0	0	0	0	0	0	0	0	0	0	0	0	0	0	0	0	0	0	0	0	0	0
Solyc01g014460	0		0	0	0	0	0	0	0	0	0	0	0	0	0	0	0	0	0	0	0	0	0	0	0	0	0	0	0	0	0	0	0	0	0	0	0	0	0	0	0	0	0	0	0	0	0	0	0
Solyc01g014470	1.8475	Expressed	0	0.5875	0.15	0.13	0.1175	0.0225	0.045	0.17	0	0	0.0575	0.0225	0.0575	0	0.025	0	0.133333	0.6675	0.195	0.1275	0.1125	0.2375	0.0975	0.235	0.025	0.04	0.095	0.02	0	0.025	0.03	0	0	0.0333333	0.4225	0.17	0.1275	0.0975	0	0.0275	0	0.0525	0.025	0	0	0.0275	0
Solyc01g014480	47.185	Expressed	1.88	12.2525	12.93	12.9675	20.7225	17.2275	18.76	18.9775	20.8825	21.41	23.1525	22.79	24.585	24.5125	20.2025	21.715	1.97	13.4925	11.6625	24.2175	19.8	18.08	16.89	21.53	22.395	23.8625	26.6425	21.615	21.6425	24.585	19.155	21.3025	3.31333	1.01667	13.13	24.3475	19.815	17.8	21.4725	17.5775	19.5325	19.19	21.695	20.3525	23.11	21.235	19.825
Solyc01g014490	37.715	Expressed	4.33667	35.745	31.4875	29.6775	36.185	32.0775	33.4025	36.275	34.5875	34.1825	32.9975	28.6525	29.8875	28.805	25.86	29.955	4.94667	34.6825	22.9475	33.76	28.725	27.5925	22.095	29.4725	31.9125	29.0675	29.51	27.5075	26.5775	26.2375	26.935	30.3875	1.27	0.79	26.585	30.965	22.6	23.3125	27.045	24.405	16.415	17.7975	17.5475	20.485	18.765	18.5175	21.715
Solyc01g014500	0.03		0	0	0	0	0	0	0	0	0.0225	0	0	0	0	0	0	0	0	0	0	0	0	0	0	0	0	0	0	0	0	0	0	0	0	0	0	0	0	0	0	0	0	0	0	0	0	0	0
Solyc01g014510	0.04		0	0	0	0	0	0	0	0	0	0	0	0	0	0	0	0	0	0	0	0	0	0	0	0	0	0	0	0	0	0	0	0	0	0	0	0.0225	0	0	0	0	0	0	0	0	0	0	0
Solyc01g014520	0.0566667		0	0	0	0	0	0	0	0	0	0	0	0	0	0	0	0	0	0	0	0	0	0	0	0	0	0	0	0	0	0	0	0	0	0	0	0	0	0	0	0	0	0	0	0	0	0	0
Solyc01g014530	0.995		0	0	0	0.025	0.2125	0.1175	0.17	0.375	0.2925	0.495	0.4575	0.4575	0.4275	0.66	0.995	0.9225	0.163333	0	0	0	0	0	0	0	0.1375	0.295	0.1975	0.375	0.1775	0.7125	0.555	0.7225	0	0	0	0	0	0	0	0	0.025	0.175	0	0.2675	0.195	0.335	0.22
Solyc01g014540	0.0225		0	0	0	0	0	0	0	0	0	0	0	0	0	0	0	0	0	0	0	0	0	0	0	0	0	0	0	0	0	0	0	0	0	0	0	0	0	0	0	0	0	0	0	0	0	0	0
Solyc01g014550	0.06		0	0	0	0	0	0	0	0	0	0	0	0	0.0275	0.045	0	0	0	0	0	0	0	0	0	0	0	0	0	0	0.0325	0.03	0	0	0	0	0	0	0	0	0	0	0.03	0.025	0	0	0	0	0
Solyc01g014560	6.2375	Expressed	0	0	0	0	0	0	0	0.0325	0.13	0.28	0.4025	2.0275	3.25	5.1175	4.0975	2.8725	0	0	0	0	0	0	0	0	0.995	2.995	1.4125	4.9	3.905	5.395	3.5925	3.0925	0	0	0	0	0	0.0475	0.1125	0.0525	3.6675	4.185	5.905	3.3625	6.2375	5.9075	3.945
Solyc01g014570	0.045		0	0	0	0	0	0	0	0	0	0	0	0	0	0	0	0	0	0	0	0	0	0	0	0	0	0	0	0	0	0	0	0	0	0	0	0	0	0	0	0	0	0	0	0	0	0	0
Solyc01g014580	0.045		0	0	0	0	0	0	0	0	0	0	0	0	0	0	0	0	0	0	0	0	0	0	0	0	0	0	0	0	0	0	0	0	0	0	0	0	0	0	0	0	0	0	0	0	0	0	0
Solyc01g014600	0.0225		0	0	0	0	0	0	0	0	0	0	0	0	0	0	0	0	0	0	0	0	0	0	0	0	0	0	0	0	0	0	0	0	0	0	0	0	0	0	0	0	0	0	0	0	0	0	0
Solyc01g014610	0.6525		0	0	0.1	0.0775	0.14	0.2975	0.4325	0.3625	0.2975	0.1375	0.3025	0.095	0.045	0.03	0.13	0.17	0	0	0	0.1325	0.2075	0.385	0.365	0.3775	0.25	0.1725	0.315	0.0825	0.095	0.105	0.1575	0.3425	0	0	0.025	0.055	0.0675	0.0875	0.235	0.055	0.0725	0.1175	0.155	0.075	0	0.0875	0.2575
Solyc01g014620	1.12	Expressed	0.123333	0	0.025	0	0	0.0225	0.0225	0	0	0	0	0	0.0225	0	0	0	0	0.225	0.0825	0.05	0	0	0	0	0.035	0	0	0	0.02	0	0	0	0.31	0.27	0.26	0.3125	0.16	0.085	0	0.02	0.0225	0.0625	0	0.0425	0	0.0225	0
Solyc01g014630	0.0525		0	0	0	0	0	0	0	0	0	0	0	0	0	0	0	0	0	0	0	0	0	0	0	0	0	0	0	0	0	0	0	0	0	0	0	0	0	0	0	0	0	0	0	0	0	0	0
Solyc01g014640	0.03		0	0	0	0	0	0	0	0	0	0	0	0	0	0	0	0	0	0	0	0	0	0	0	0	0	0	0	0	0	0	0	0	0	0	0	0	0	0	0	0	0	0	0	0	0	0	0
Solyc01g014650	0.045		0	0	0	0	0	0	0	0	0	0	0	0	0	0	0	0	0	0	0	0	0	0	0	0	0	0	0	0	0	0	0	0	0	0	0	0	0	0	0	0	0	0	0	0	0	0	0
Solyc01g014660	0		0	0	0	0	0	0	0	0	0	0	0	0	0	0	0	0	0	0	0	0	0	0	0	0	0	0	0	0	0	0	0	0	0	0	0	0	0	0	0	0	0	0	0	0	0	0	0
Solyc01g014670	0.09		0	0	0	0	0	0	0	0	0	0	0	0	0	0	0	0	0	0	0	0	0	0	0	0	0	0	0	0	0	0	0	0	0	0	0	0.0225	0	0	0	0	0	0	0	0	0	0	0
Solyc01g014680	0.05		0	0	0	0	0	0	0	0	0	0	0	0	0.0225	0	0.025	0	0	0	0	0	0	0	0	0	0	0.03	0.025	0	0.02	0.0275	0	0	0	0	0	0	0	0	0	0	0	0	0	0	0	0	0
Solyc01g014690	0.0666667		0	0	0	0	0	0	0	0	0	0	0	0	0.045	0	0.025	0	0	0	0	0	0	0	0	0	0.035	0.055	0.025	0	0	0.0275	0	0	0	0	0	0	0	0	0	0	0	0	0	0	0	0	0
Solyc01g014700	5.03667	Expressed	0	0	0.0775	0.1725	0.655	0.4825	0.25	0.3025	1.19	1.305	1.685	1.61	1.8225	1.765	1.1125	0.67	0	0	0.0325	0.0575	0.1525	0.1475	0.325	0.155	1.6875	2.465	2.0375	1.0175	0.7725	1.18	0.4025	0.5275	0	0	0	0	0	0	0.0275	0	0.025	0.0625	0.075	0.0225	0	0	0
Solyc01g014710	1.925	Expressed	0.03	0.11	0.18	0.08	0.0275	0.0775	0.035	0	0.0775	0.0325	0.05	0.135	0.2825	0.24	0.14	0.14	0.09	0.095	0.27	0.025	0.0325	0	0.0575	0.025	0.0325	0.025	0.025	0.0425	0.02	0.15	0	0.09	0.166667	0	0.1275	0.1275	0	0.0675	0.0475	0	0.075	0.62	0	0.2325	0.0675	0.1525	0.0175
Solyc01g014720	2.4325	Expressed	0	0	0	0.0225	0	0	0	0	0	0.1525	0	0.045	0	0	0	0	0	0	0	0.08	0	0	0	0	0.035	0	0	0.0225	0	0.0475	0	0	0	0	0.1025	0.48	0.0975	0.045	0.0275	0.0325	0	0.03	0	0	0	0	0
Solyc01g014730	0.28		0.04	0.095	0.0525	0.025	0	0	0.045	0	0	0	0	0.07	0.045	0	0.03	0	0.03	0.0425	0	0.025	0	0	0	0	0.035	0	0	0	0.0975	0.0275	0.105	0.095	0	0	0.1175	0.05	0.0325	0.02	0	0	0.03	0.0525	0.16	0.0975	0.225	0.1775	0.2425
Solyc01g014740	0.18		0	0	0	0.0275	0.025	0.0525	0.12	0	0.0275	0.0975	0.0225	0	0.045	0.03	0.0225	0	0	0	0.0325	0.08	0.105	0.18	0.13	0.1775	0.035	0.03	0.08	0.045	0	0.055	0	0	0	0	0	0	0.03	0	0	0	0	0	0	0	0	0	0
Solyc01g014760	0.0225		0	0	0	0	0	0	0	0	0	0	0	0	0	0	0	0	0	0	0	0	0	0	0	0	0	0	0	0	0	0	0	0	0	0	0	0	0	0	0	0	0	0	0	0	0	0	0
Solyc01g014770	0.0875		0	0	0	0	0	0	0	0.0325	0.0275	0.0325	0.06	0	0.05	0	0	0	0	0	0	0.025	0	0	0	0	0	0	0	0	0	0	0	0	0	0	0	0.03	0	0	0	0	0.0275	0.0875	0.025	0	0	0.025	0
Solyc01g014780	0		0	0	0	0	0	0	0	0	0	0	0	0	0	0	0	0	0	0	0	0	0	0	0	0	0	0	0	0	0	0	0	0	0	0	0	0	0	0	0	0	0	0	0	0	0	0	0
Solyc01g014790	0.0275		0	0	0	0	0	0	0	0	0	0	0	0	0	0	0	0	0	0	0	0	0	0	0	0	0	0	0	0	0	0	0	0	0	0	0	0	0	0	0	0	0	0	0	0	0	0	0
Solyc01g014800	0		0	0	0	0	0	0	0	0	0	0	0	0	0	0	0	0	0	0	0	0	0	0	0	0	0	0	0	0	0	0	0	0	0	0	0	0	0	0	0	0	0	0	0	0	0	0	0
Solyc01g014820	0.03		0	0	0	0	0	0	0	0	0	0	0	0	0	0	0	0	0	0	0	0	0	0	0	0	0	0	0	0	0	0	0	0	0	0	0	0	0	0	0	0	0	0	0	0	0	0	0
Solyc01g014830	0.02		0	0	0	0	0	0	0	0	0	0	0	0	0	0	0	0	0	0	0	0	0	0	0	0	0	0	0	0	0	0	0	0	0	0	0	0	0	0	0	0	0	0	0	0	0	0	0
Solyc01g014840	13.9725	Expressed	0	0.4075	0.305	0.4	0.8725	2.6475	1.1975	1.0225	5.365	1.47	1.505	2.1425	1.5275	0.4675	0.9125	0.94	0.0333333	0.3575	0.4475	0.4275	0.4875	1.425	0.715	0.86	1.6775	0.77	0.86	1.085	0.46	0.2775	0.415	0.445	0.0466667	0.736667	0.5325	0.56	0.74	1.0975	0.7725	0.6325	2.4075	0.9175	0.875	1.0425	0.4975	0.2075	0.395
Solyc01g014850	103.535	Expressed	24.2733	52.8175	51.38	38.9125	37.92	39.78	42.6525	35.4375	38.5125	33.5325	33.665	34.4175	31.5675	27.71	27.855	29.45	29.5367	51.425	54.2725	36.56	39.965	39.1525	33.39	43.615	39.7975	35.8225	39.345	28.9475	32.865	28.0825	35.04	34.4375	40.2033	27.02	53.8925	55.585	44.71	35.495	34.04	36.0075	27.0475	28.395	27.72	30.8475	28.53	28.06	34.375
Solyc01g014860	12.4325	Expressed	0	2.67	4.325	2.51	4.8375	5.065	4.905	3.845	5.33	4.6425	3.7425	3.955	3.78	3.5475	3.565	3.785	0	3.665	3.725	4.605	5.45	4.47	4.6125	5.615	5.155	3.955	4.7125	3.7775	3.6475	3.375	4.72	3.835	0	0.0433333	4.085	5.5775	5.6075	5.175	4.305	5.1375	3.9425	3.1675	2.8625	3.6975	2.6175	3.7075	3.99
Solyc01g014870	0.0325		0	0	0	0	0	0	0	0.0275	0	0	0	0	0	0	0	0	0	0	0	0	0	0	0	0	0	0.015	0	0	0	0	0	0	0	0	0	0	0	0	0	0	0	0	0	0.0325	0	0	0
Solyc01g014880	0.045		0	0	0	0	0	0	0	0	0	0	0	0	0	0	0	0	0	0	0	0	0	0	0	0	0	0	0	0	0	0	0	0	0	0	0	0	0	0	0	0	0	0	0	0	0	0	0
Solyc01g014890	0.025		0	0	0	0	0	0	0	0	0	0	0	0	0	0	0	0	0	0	0	0	0	0	0	0	0	0	0	0	0	0	0	0	0	0	0	0	0	0	0	0	0	0	0	0	0	0	0
Solyc01g014900	0		0	0	0	0	0	0	0	0	0	0	0	0	0	0	0	0	0	0	0	0	0	0	0	0	0	0	0	0	0	0	0	0	0	0	0	0	0	0	0	0	0	0	0	0	0	0	0
Solyc01g014910	2.995	Expressed	0	0.02	0	0.0275	0	0	0	0	0	0	0	0	0	0	0	0	0	0.2625	0.0525	0.1075	0	0	0	0	0	0	0	0	0	0	0	0	0	0	0.43	0.535	0	0	0	0	0	0	0	0	0	0	0
Solyc01g014920	0		0	0	0	0	0	0	0	0	0	0	0	0	0	0	0	0	0	0	0	0	0	0	0	0	0	0	0	0	0	0	0	0	0	0	0	0	0	0	0	0	0	0	0	0	0	0	0
Solyc01g014930	0.03		0	0	0	0	0	0	0	0	0	0	0	0	0	0	0	0	0	0	0	0	0	0	0	0	0	0	0	0	0	0	0	0	0	0	0	0	0	0	0	0	0	0	0	0	0	0	0
Solyc01g014940	0.1825		0	0	0	0	0	0	0	0	0	0	0	0	0	0	0	0	0	0	0	0	0	0	0	0	0	0	0	0	0	0	0	0	0	0	0	0.0275	0	0	0	0	0	0	0	0	0	0	0
Solyc01g014950	6.8175	Expressed	0	0	0	0.0475	0.3275	0.2325	0.25	0.185	0.1575	0.1275	0.3025	0.2075	0.1375	0.1025	0.1325	0.09	0	0.0425	0.1075	0.0825	0.1775	0.03	0.1325	0.38	0.06	0.21	0.28	0.065	0.12	0.11	0.1	0.0125	0	0	0.4	1.3575	0.0625	0.105	0.0725	0.0475	0	0	0.0525	0.0225	0.035	0.0175	0
Solyc01g014960	0.4875		0	0	0	0	0.0525	0	0.0575	0.0625	0	0.0325	0.0275	0	0	0	0	0	0	0	0.025	0.025	0	0.0625	0.03	0.055	0	0	0.02	0	0	0	0	0	0	0	0.0375	0.105	0.095	0.0225	0	0.04	0	0	0	0	0	0	0
Solyc01g014970	0.31		0	0	0	0	0	0	0	0	0	0	0	0	0	0	0	0	0	0.0425	0	0	0	0	0	0	0	0	0	0	0	0	0	0	0	0	0.025	0	0	0	0	0	0	0	0	0	0	0	0
Solyc01g014980	4.21	Expressed	0	0	0	0	0	0	0	0	0	0	0	0	0	0	0	0	0	0	0.0575	0.0275	0	0	0	0	0	0	0	0	0	0	0.0225	0	0	0	0.1825	0.46	0	0	0.0275	0	0	0	0	0	0	0.0175	0
Solyc01g014990	4.9175	Expressed	0	0	0	0	0	0	0	0	0	0	0	0	0	0	0	0	0	0.0325	0.075	0.0275	0	0	0.0325	0	0	0	0	0	0	0.025	0	0	0	0	0.105	0.4025	0.0325	0	0	0	0	0	0	0	0.035	0	0
Solyc01g015000	172.307	Expressed	3.24	42.5375	60.3325	80.2275	24.285	15.4075	15.87	15.8175	18.215	16.6675	17.2675	23.635	27.87	28.435	35.5725	28.08	2.25667	42.1725	41.4125	15.91	21.6475	13.2525	12.84	15.32	15.3125	15.285	15.815	21.52	22.4775	21.785	23.0675	16.1775	6.46333	4.45333	54.8875	28.0825	23.67	18.1375	15.99	22.79	12.9725	18.5225	11.6425	12.3375	8.615	13.8675	11.1175
Solyc01g015010	4.415	Expressed	0	0.0625	0.1225	0.0775	0.0325	0.03	0.1525	0.0275	0.05	0	0.1025	0.115	0.1025	0.065	0.0225	0.095	0	0.0325	0.1375	0.0575	0.0225	0.03	0.065	0	0.035	0	0.02	0.02	0.0325	0.0275	0.0525	0.095	0	0	0.0975	0.67	0.0675	0.0225	0.055	0.02	0	0.3375	0	0.14	0.06	0.0525	0.02
Solyc01g015020	141.515	Expressed	19.3233	31.875	44.7475	62.605	80.5975	78.85	79.11	74.6025	87.04	83.44	80.41	89.49	90.1925	79.085	74.5825	77.0675	10.68	35.555	44.1375	78.45	72.425	88.9975	75.94	88.04	96.7875	97.3	91.39	83.4525	81.4075	74.4125	78.255	86.61	11.5567	5.48333	56.1275	67.615	68.5625	84.045	88.645	87.7325	72.795	72.0325	81.545	73.42	72.355	74.1625	76.5175
Solyc01g015030	0.0575		0	0	0	0	0	0	0	0	0	0	0	0	0	0	0	0	0	0	0	0	0	0	0	0	0	0	0	0	0	0	0	0	0	0	0	0	0	0	0	0	0	0	0	0	0	0	0
Solyc01g015040	9.055	Expressed	0	0.115	0.105	0.53	4.4275	5.4325	5.3875	6.9525	6.7775	7	9.055	5.32	6.62	6.1825	4.0425	4.7875	0	0.31	0.19	4.5925	5.175	7.485	3.955	7.1425	5.02	6.1325	7.1	5.2825	4.4875	5.4	4.6725	6.355	0	0	0.055	2.36	3.63	3.3	5.845	3.4025	2.4775	2.3825	3.315	1.7175	3.505	2.5275	2.38
Solyc01g015050	9.98	Expressed	0	0.12	0.0825	0.5175	5.0875	5.6825	6.385	7.8525	6.3775	6.7525	8.2775	5.42	5.3175	5.5825	4.4675	6.9225	0	0.2725	0.0325	5.7075	6.9875	6.8875	4.89	6.66	5.7125	6.5025	7.45	5.3275	5.095	5.02	4.615	6.7875	0	0	0.025	2.91	4.5275	3.77	6.165	3.4875	2.795	2.3325	4.3875	1.795	2.565	2.63	2.7525
Solyc01g015060	0.045		0	0	0	0	0	0	0	0	0.0275	0	0	0	0.0275	0	0.03	0.0275	0	0	0	0.025	0	0	0	0	0	0	0	0	0	0	0	0	0	0	0	0	0	0	0	0	0	0	0	0	0	0	0
Solyc01g015070	52.9833	Expressed	37.98	2.88	2.35	5.6625	3.04	2.31	2.6375	3.45	2.845	3.7625	3.59	2.645	2.4925	2.5725	3.07	5.12	28.0233	2.6925	2.455	3.44	4.07	2.6075	2.175	3.4775	3.2025	2.9375	2.9175	3.335	3.3175	2.59	3.23	4.4425	45.6867	2.25333	2.765	2.8625	3.01	3.04	3.04	2.7825	2.7225	4.01	5.1525	5.1225	6.395	5.615	5.855
Solyc01g015080	0		0	0	0	0	0	0	0	0	0	0	0	0	0	0	0	0	0	0	0	0	0	0	0	0	0	0	0	0	0	0	0	0	0	0	0	0	0	0	0	0	0	0	0	0	0	0	0
Solyc01g015090	0.025		0	0	0	0	0	0	0	0	0	0	0	0.025	0.0225	0	0	0	0	0	0	0	0	0	0	0	0	0	0	0	0	0	0	0	0	0	0	0	0	0	0	0	0	0.025	0	0	0	0	0
Solyc01g015100	0.0525		0	0	0	0	0	0	0	0	0	0	0	0	0	0	0	0	0	0	0	0	0	0	0	0	0	0	0	0	0	0	0	0	0	0	0	0	0	0	0	0	0	0	0	0	0.035	0	0
Solyc01g015110	0.1175		0.07	0.0225	0.0225	0	0	0	0	0	0	0	0	0.025	0	0	0.0225	0.03	0	0	0	0	0	0	0.0275	0	0	0.03	0	0	0	0	0.0225	0	0.0566667	0	0	0	0	0	0	0	0	0	0	0	0	0	0
Solyc01g015120	0.0325		0	0	0	0	0	0	0	0	0	0.0325	0	0	0	0	0	0	0	0	0.025	0	0	0	0	0	0	0	0	0	0	0	0	0	0	0	0	0	0	0	0	0	0	0	0	0	0	0	0
Solyc01g015130	0.095		0	0	0	0	0	0	0	0	0	0	0	0	0	0	0	0	0	0	0	0	0	0	0	0	0	0	0	0	0	0	0	0	0	0	0	0	0	0	0	0	0	0	0	0	0	0	0
Solyc01g015140	0.1475		0	0	0	0	0	0	0	0	0	0	0	0	0	0	0	0.03	0	0	0	0	0	0	0	0	0	0	0	0	0	0	0	0	0	0	0.035	0	0	0	0	0	0	0	0	0	0	0	0
Solyc01g015150	0.0325		0	0	0	0	0	0	0	0.0275	0	0	0	0	0	0	0	0	0	0	0	0	0	0	0	0	0	0	0	0	0	0	0	0	0	0	0	0	0	0	0.0275	0	0	0	0	0	0	0	0
Solyc01g015160	0.055		0	0	0	0	0	0	0	0	0	0	0	0	0	0	0	0	0	0	0	0	0	0	0	0	0	0	0	0	0	0	0	0	0	0	0	0	0	0	0	0	0	0	0	0	0	0	0
Solyc01g015170	0.03		0	0	0	0	0	0	0	0	0	0	0	0	0	0	0	0	0	0	0	0	0	0	0	0	0	0	0	0	0	0	0	0	0	0	0	0	0	0	0	0	0	0	0	0	0	0	0
Solyc01g015180	0		0	0	0	0	0	0	0	0	0	0	0	0	0	0	0	0	0	0	0	0	0	0	0	0	0	0	0	0	0	0	0	0	0	0	0	0	0	0	0	0	0	0	0	0	0	0	0
Solyc01g015190	0.0325		0	0	0	0	0	0	0	0	0	0	0	0	0	0	0	0	0	0	0	0	0	0	0	0	0	0	0	0	0	0	0	0	0	0	0	0	0	0	0	0	0	0	0	0	0	0	0
Solyc01g015200	0.0325		0	0	0	0	0	0	0	0	0	0	0	0	0	0	0	0	0	0	0	0	0	0	0	0	0	0	0	0	0	0	0	0	0	0	0	0	0	0	0	0	0	0	0	0	0.0325	0	0
Solyc01g015210	0.31		0	0	0	0	0	0	0	0	0	0	0	0	0	0	0	0	0	0	0.0475	0	0	0	0	0	0	0	0	0	0	0	0	0	0	0	0.025	0.085	0	0	0	0.02	0	0	0	0	0	0	0
Solyc01g015220	0.13		0	0	0	0	0	0	0	0	0	0	0	0	0	0	0	0	0	0	0	0	0	0	0	0	0	0	0	0	0	0	0	0	0	0	0	0.0275	0	0	0	0	0	0	0	0	0	0	0
Solyc01g015230	0.0275		0	0	0	0	0	0	0	0	0	0	0	0	0	0	0	0	0	0	0	0	0	0	0	0	0	0	0	0	0	0	0	0	0	0	0	0	0	0	0	0	0	0	0	0	0	0	0
Solyc01g015240	0.0625		0	0	0	0	0	0	0	0	0	0	0	0	0	0	0	0	0	0	0	0	0	0	0	0	0	0	0	0	0	0	0	0	0	0	0	0	0	0	0	0	0	0	0	0	0	0	0
Solyc01g015250	0.0525		0.04	0	0.0225	0	0	0	0	0	0	0	0	0	0	0	0	0	0	0	0.0325	0	0	0	0	0	0	0	0	0	0	0	0	0	0	0	0	0	0	0	0	0	0	0	0	0	0	0	0
Solyc01g015260	3.76	Expressed	0.113333	0.3675	0.56	0.545	1.8925	2.4775	1.9825	1.8175	3.615	3.025	3.225	2.0525	1.4925	1.2475	1.1875	1.01	0.263333	0.6025	0.4575	1.715	1.2125	2.3025	1.5025	1.315	2.15	2.02	1.5525	1.54	1.1125	1.12	0.5875	1.405	0.0766667	0.156667	0.3375	1.1075	0.5525	2.1475	1.8675	1.5425	1.28	1.14	1.4925	0.74	1.175	0.62	0.6225
Solyc01g015270	0.22		0	0	0	0	0	0	0	0	0	0	0	0	0	0	0	0	0	0	0	0	0	0	0	0	0	0	0	0	0	0	0	0	0	0	0.025	0	0	0	0	0	0	0	0	0	0	0	0
Solyc01g015280	0.025		0	0	0	0	0	0	0	0	0	0	0	0	0	0	0	0	0	0	0	0	0	0	0	0	0	0	0	0	0	0	0	0	0	0	0	0	0	0	0	0	0	0	0	0	0	0	0
Solyc01g015290	0		0	0	0	0	0	0	0	0	0	0	0	0	0	0	0	0	0	0	0	0	0	0	0	0	0	0	0	0	0	0	0	0	0	0	0	0	0	0	0	0	0	0	0	0	0	0	0
Solyc01g015300	3.92	Expressed	0.323333	0.56	0.9875	0.955	2.43	2.1175	2.6975	3.0075	2.81	3.435	3.92	3.0725	2.2525	2.5825	1.975	2.1275	1.91333	0.63	0.9725	3.9	1.86	1.91	2.2525	2.325	2.465	2.6525	2.765	2.0725	2.0275	2.9525	2.12	2.12	0.74	0.47	0.5075	1.2675	1.42	1.65	1.7925	1.8225	1.425	1.3775	2.6175	1.5225	2.375	1.6925	1.7625
Solyc01g016300	0.0325		0	0	0	0	0	0	0	0	0	0	0	0	0	0	0	0	0	0	0	0	0	0	0	0	0	0	0	0	0	0	0	0	0	0	0	0	0	0	0	0	0	0	0	0	0	0	0
Solyc01g016310	0.0275		0	0	0	0	0	0	0	0	0	0	0	0	0	0	0	0	0	0	0	0	0	0	0	0	0	0	0	0	0	0	0	0	0	0	0	0	0	0	0	0	0	0	0	0	0	0	0
Solyc01g016320	0.0475		0	0	0	0	0	0	0	0	0	0	0	0	0	0	0	0	0	0.0275	0	0	0	0	0	0	0	0	0	0	0	0	0	0	0	0	0	0	0.0325	0	0	0	0	0	0	0	0	0	0
Solyc01g016330	0.045		0	0	0	0	0	0	0	0	0	0	0	0	0.0275	0	0	0	0	0	0	0	0	0	0	0	0	0	0	0	0	0.0275	0	0	0	0	0	0	0	0	0	0	0	0	0	0	0	0	0
Solyc01g016340	0.045		0	0	0	0	0	0	0	0	0	0	0	0	0.0275	0	0	0	0	0	0	0	0	0	0	0	0	0	0	0	0	0	0	0	0	0	0	0	0	0	0	0	0	0	0	0	0	0	0
Solyc01g016350	0.055		0	0	0	0	0	0	0	0	0	0	0	0	0	0	0	0	0	0	0	0	0	0	0	0	0	0	0	0	0	0	0	0	0	0	0	0	0	0	0	0	0	0	0	0	0	0	0
Solyc01g016360	0.263333		0	0	0	0	0	0	0	0.0275	0	0	0	0	0	0	0	0	0	0	0	0	0	0.03	0	0	0.035	0	0	0	0	0	0	0	0	0	0	0	0	0	0	0	0	0	0	0	0	0	0
Solyc01g016370	0.316667		0	0	0	0	0	0	0	0.0275	0	0	0	0	0.0225	0	0	0	0	0	0	0	0	0.03	0	0	0.035	0	0	0	0	0	0	0	0	0	0	0	0	0	0	0	0	0.025	0	0	0	0	0
Solyc01g016380	0.24		0.04	0.0225	0.0475	0	0	0	0	0	0	0	0	0	0	0	0	0	0.03	0.04	0.09	0	0	0	0	0	0	0	0	0	0	0	0	0	0	0	0.025	0.0225	0.0325	0	0	0	0	0	0	0	0	0	0
Solyc01g016390	0.2875		0.04	0.0475	0.0475	0	0	0	0	0	0	0	0	0	0	0	0	0	0	0.06	0.09	0	0	0	0	0	0	0	0	0	0	0	0	0	0	0	0.025	0	0.0325	0	0	0	0	0	0	0	0	0	0
Solyc01g016400	8.2575	Expressed	0	0.0325	0.0475	0.14	0.335	0.075	0.08	0.3475	1.67	1.8075	2.1375	2.4075	1.6325	2.06	2.02	1.53	0	0.09	0.0475	0.18	0.1275	0.54	0.4325	0.4225	4.915	4.475	2.9975	3.9875	2.8425	2.5075	2.3625	2.51	0	0	0.0675	0.25	0.3925	0.6375	0.655	0.7825	1.1975	1.1375	1.4725	1.64	1.9525	2.385	3.6075
Solyc01g016410	54.7467	Expressed	14.9733	6.1925	7.12	15.335	19.8925	21.505	20.895	19.995	21.7875	25.9225	26.8875	30.775	38.6675	40.475	42.3125	43.4775	11.4567	5.3875	10.0325	18.5775	19.875	25.9	31.3225	24.3375	31.5875	36.52	27.8925	36.0175	31.895	39.16	38.4775	37.9375	28.1333	7.57667	9.3	15.7975	16.08	29.1975	25.655	26.3275	40.525	37.6325	37.3125	39.175	39.9425	48.095	43.78
Solyc01g016430	0.0325		0	0	0	0	0	0	0	0	0	0	0	0	0	0	0	0	0	0	0	0	0	0	0	0	0	0	0	0	0	0	0	0	0	0	0	0	0	0	0	0	0	0	0	0	0	0	0
Solyc01g016450	0.06		0	0	0	0	0.0325	0.0225	0	0	0	0	0	0	0	0	0	0.05	0	0	0	0	0	0.06	0	0.0325	0	0	0	0	0	0.0275	0	0	0	0	0.025	0	0	0	0	0	0	0.025	0.025	0	0	0	0
Solyc01g016460	15.75	Expressed	13.9733	12.11	7.45	13.64	12.63	9.26	9.6	11.845	8.6625	11.6425	11.635	3.9025	4.25	3.5275	3.24	4.9575	11.1233	12.225	6.8375	9.8825	8.165	6.03	6.505	6.1075	4.9025	4.25	5.2525	2.72	2.5075	3.3925	2.5975	4.8325	4.62667	0.566667	5.67	6.215	5.2925	6.1	5.7125	5.41	1.82	1.8675	2.4775	1.5	1.81	1.475	1.675
Solyc01g016470	224.593	Expressed	168.607	86.485	41.0725	61.8475	24.4725	20.7025	21.82	22.265	28.265	28.93	30.195	15.1475	12.7975	11.4575	12.915	19.5975	155.84	75.38	49.7425	32.49	20.2975	15.59	16.425	16.915	16.4225	14.2625	15.3825	12.27	8.805	11.135	9.2925	12.305	168.11	184.033	30.595	22.2775	17.43	11.1475	9.7025	10.7725	13.86	13.0925	13.3975	10.5925	12.5925	10.13	13.575
Solyc01g016480	0.8		0	0	0	0	0	0	0	0	0	0	0	0	0	0	0	0	0	0	0	0	0	0.0325	0	0	0	0	0	0	0	0	0	0	0	0	0.07	0.0225	0	0	0	0	0	0	0	0	0	0	0
Solyc01g016510	0.1775		0	0	0	0	0	0	0	0	0	0	0	0	0	0	0	0	0	0	0	0	0	0	0	0	0	0	0	0	0	0	0	0	0	0	0	0.0525	0.065	0	0	0	0	0	0	0	0	0	0
Solyc01g016520	1.645	Expressed	0	0	0	0.025	0	0	0.0575	0	0	0	0.03	0	0	0.0225	0	0	0	0.0825	0	0	0	0	0	0	0	0	0	0	0	0.025	0.0225	0.0475	0	0	0.0375	0.0525	0.0325	0	0.05	0	0.0275	0	0	0.0325	0.035	0.025	0
Solyc01g016530	0.446667		0	0	0	0	0	0	0	0	0	0	0	0	0	0	0	0	0	0.0325	0	0	0	0	0	0	0	0	0	0	0	0	0	0	0	0	0	0.03	0.065	0	0	0	0	0	0	0	0	0	0
Solyc01g016540	7.61667	Expressed	0	0.0225	0	0	0	0	0	0	0	0	0	0	0	0	0	0	0	0.2375	0.095	0	0.0225	0	0	0	0	0	0	0	0	0	0	0	0	0	0.475	0.15	0.0325	0	0	0.04	0	0	0	0	0	0	0
Solyc01g016550	0.04		0	0	0	0	0	0	0	0	0	0	0	0	0	0	0	0	0	0	0	0	0	0	0	0	0	0	0	0	0	0	0	0	0	0	0	0	0	0	0	0	0	0	0	0	0	0	0
Solyc01g016560	0.12		0.03	0	0	0	0	0	0	0.0275	0	0	0	0	0	0	0	0	0	0	0	0	0	0	0	0	0	0	0	0	0	0	0	0	0	0	0	0	0	0	0	0	0	0	0	0	0	0	0
Solyc01g016570	7.845	Expressed	1.85	5.1725	3.8	7.845	5.67	4.2575	4.615	6.535	4.6925	4.73	5.6875	3.9925	2.955	3.05	2.615	2.7325	4.1	4.415	3.345	7.1975	3.8725	3.4925	2.7075	3.4175	2.555	2.535	2.25	2.51	2.0525	2.44	1.6225	2.7025	1.82	0.15	2.7275	3.515	1.695	2.4	2.02	1.835	1.2625	1.525	2.1	1.425	1.805	1.115	1.3575
Solyc01g016580	0.0525		0	0	0	0	0	0	0	0	0	0	0	0	0	0	0	0	0	0	0	0	0	0	0	0	0	0	0	0	0	0	0	0	0	0	0	0	0	0	0	0	0	0	0	0	0	0	0
Solyc01g016590	0		0	0	0	0	0	0	0	0	0	0	0	0	0	0	0	0	0	0	0	0	0	0	0	0	0	0	0	0	0	0	0	0	0	0	0	0	0	0	0	0	0	0	0	0	0	0	0
Solyc01g016600	0.22		0	0	0	0	0	0	0	0	0	0	0	0	0	0	0	0	0	0	0	0	0	0	0	0	0	0	0	0	0	0	0	0	0	0	0.035	0	0	0	0	0	0	0	0	0	0	0	0
Solyc01g016610	0.055		0	0	0	0	0	0	0	0	0	0	0	0	0	0	0	0	0	0	0	0	0	0	0	0	0	0	0	0	0	0	0	0	0	0	0	0	0	0	0.0275	0	0	0	0	0	0	0	0
Solyc01g016620	0.04		0	0	0	0	0	0	0	0	0	0	0	0	0	0	0	0	0	0	0	0	0	0	0	0	0	0	0	0	0	0	0	0	0	0	0	0	0	0	0	0	0	0	0	0	0	0	0
Solyc01g016630	0		0	0	0	0	0	0	0	0	0	0	0	0	0	0	0	0	0	0	0	0	0	0	0	0	0	0	0	0	0	0	0	0	0	0	0	0	0	0	0	0	0	0	0	0	0	0	0
Solyc01g016640	0.0525		0	0	0	0	0	0	0	0	0	0	0	0	0	0	0	0	0	0	0	0	0	0	0	0	0	0	0	0	0	0	0	0	0	0	0	0	0	0	0	0	0	0	0	0	0	0	0
Solyc01g016650	0.19		0	0	0	0.0475	0	0	0	0.03	0	0	0.03	0	0	0	0	0	0	0	0	0	0	0	0	0	0	0	0	0	0	0	0	0	0	0	0	0	0	0	0	0	0	0	0	0	0	0	0
Solyc01g016660	0.0625		0	0	0	0	0	0	0	0	0	0	0	0	0	0	0	0	0	0	0	0	0	0	0	0	0	0	0	0	0	0	0	0	0	0	0	0	0	0	0	0	0	0	0	0	0	0	0
Solyc01g016670	0		0	0	0	0	0	0	0	0	0	0	0	0	0	0	0	0	0	0	0	0	0	0	0	0	0	0	0	0	0	0	0	0	0	0	0	0	0	0	0	0	0	0	0	0	0	0	0
Solyc01g016680	0		0	0	0	0	0	0	0	0	0	0	0	0	0	0	0	0	0	0	0	0	0	0	0	0	0	0	0	0	0	0	0	0	0	0	0	0	0	0	0	0	0	0	0	0	0	0	0
Solyc01g016690	0		0	0	0	0	0	0	0	0	0	0	0	0	0	0	0	0	0	0	0	0	0	0	0	0	0	0	0	0	0	0	0	0	0	0	0	0	0	0	0	0	0	0	0	0	0	0	0
Solyc01g016700	0.0666667		0	0	0	0.025	0	0	0	0	0	0	0	0.045	0.0275	0.0225	0.0625	0.03	0	0.0225	0.0225	0.0525	0	0	0	0	0	0	0	0.0225	0	0	0	0	0	0	0	0	0	0	0	0	0	0	0	0	0	0	0
Solyc01g016710	0.08		0	0	0	0	0	0.03	0	0	0.0275	0.0325	0.045	0.025	0	0	0	0.0275	0	0	0	0.0775	0	0	0.0325	0	0	0	0	0	0	0	0	0	0	0	0	0	0.0325	0.025	0	0.0275	0	0.0275	0	0	0	0	0
Solyc01g016720	1.0025	Expressed	0	0.0325	0.0725	0.2	0.5525	0.6825	1.0025	0.51	0.6225	0.8625	0.2375	0.28	0.2725	0.13	0.095	0.0225	0	0.02	0.115	0.2125	0.255	0.5025	0.2225	0.2725	0.6475	0.3625	0.4075	0.1075	0.135	0.07	0.055	0.0775	0	0	0.1225	0.175	0.255	0.445	0.225	0.2975	0.1075	0.0625	0.1075	0.0425	0	0.0475	0.095
Solyc01g016730	0.323333		0.243333	0	0	0	0	0	0	0	0	0	0	0	0	0	0	0	0.196667	0	0	0.025	0	0	0	0	0	0	0	0	0	0	0	0	0	0	0	0	0	0	0	0	0	0	0	0	0	0	0
Solyc01g016740	0		0	0	0	0	0	0	0	0	0	0	0	0	0	0	0	0	0	0	0	0	0	0	0	0	0	0	0	0	0	0	0	0	0	0	0	0	0	0	0	0	0	0	0	0	0	0	0
Solyc01g016750	0		0	0	0	0	0	0	0	0	0	0	0	0	0	0	0	0	0	0	0	0	0	0	0	0	0	0	0	0	0	0	0	0	0	0	0	0	0	0	0	0	0	0	0	0	0	0	0
Solyc01g016760	0		0	0	0	0	0	0	0	0	0	0	0	0	0	0	0	0	0	0	0	0	0	0	0	0	0	0	0	0	0	0	0	0	0	0	0	0	0	0	0	0	0	0	0	0	0	0	0
Solyc01g016770	0.0333333		0	0	0	0	0	0	0	0	0	0	0	0	0	0	0	0	0	0	0	0	0	0	0	0	0	0	0	0	0	0	0	0	0	0	0	0	0	0	0	0	0	0	0	0	0	0	0
Solyc01g016780	0.0333333		0	0	0	0	0	0	0	0	0	0	0	0	0	0	0	0	0	0	0	0	0	0	0	0	0	0	0	0	0	0	0	0	0	0	0	0	0	0	0	0	0	0	0	0	0	0	0
Solyc01g016790	0.09		0	0	0	0.025	0	0	0	0	0	0	0	0	0	0	0	0	0	0	0.0525	0	0	0	0	0	0	0	0	0	0	0	0	0	0	0	0.09	0	0	0	0	0	0	0	0	0.02	0	0	0
Solyc01g016800	0.0525		0	0	0	0	0.0325	0	0	0	0	0.0325	0	0	0	0	0.025	0	0	0	0	0	0	0	0	0	0	0	0	0	0	0	0	0	0	0	0	0	0	0	0	0	0	0	0	0	0	0	0
Solyc01g016810	0.08		0	0	0.025	0.025	0.0325	0.0225	0	0	0	0	0	0	0.0225	0	0	0	0	0	0.0225	0.08	0.0275	0	0	0	0	0	0	0	0	0	0	0	0	0	0	0	0	0	0	0	0	0	0	0	0	0	0
Solyc01g016820	0.1175		0	0	0	0	0	0.0325	0.0225	0	0	0	0	0	0.0225	0	0	0	0	0	0	0	0.0325	0	0	0	0	0	0	0	0.0375	0	0.0275	0.025	0	0	0	0	0.0325	0.0425	0.0525	0	0.05	0	0.025	0.1175	0	0.05	0.0225
Solyc01g016830	0.025		0	0	0	0	0	0	0	0	0	0	0	0	0	0	0	0	0	0	0	0	0	0	0	0	0	0	0	0	0	0	0	0	0	0	0	0	0	0	0	0	0	0	0	0	0	0	0
Solyc01g016840	0.0525		0	0	0	0	0	0	0	0	0	0	0	0	0	0	0	0	0	0	0	0	0	0	0	0	0	0	0	0	0	0	0	0	0	0	0	0	0	0	0	0	0	0	0	0	0	0	0
Solyc01g016850	0.0225		0	0	0	0	0	0	0	0	0	0	0	0	0	0	0	0	0	0	0	0	0	0	0	0	0	0	0	0	0	0	0	0	0	0	0	0	0	0	0	0	0	0	0	0	0	0	0
Solyc01g016860	0.3925		0	0	0.025	0	0	0	0	0	0	0	0	0	0	0	0	0	0	0	0	0	0	0	0	0	0	0	0	0	0	0	0	0	0	0	0	0.055	0	0	0.0225	0	0	0	0	0	0	0	0
Solyc01g016870	0.055		0	0.0225	0	0	0	0	0	0	0	0	0	0	0	0	0	0	0	0	0	0	0	0	0	0	0	0	0	0	0	0	0	0	0	0	0	0	0	0	0	0	0	0	0	0	0	0	0
Solyc01g016880	0.0275		0	0	0	0	0	0	0	0	0	0	0	0	0	0	0	0	0	0	0	0	0	0	0	0	0	0	0	0	0	0	0	0	0	0	0	0	0	0	0	0	0	0	0	0	0	0	0
Solyc01g016890	0.055		0	0	0	0	0	0	0	0	0	0	0	0	0	0	0	0	0	0	0	0	0	0	0	0	0	0	0	0	0	0	0	0	0	0	0	0	0	0	0	0	0	0	0	0	0	0	0
Solyc01g016900	0.045		0	0	0	0	0.025	0	0	0	0	0	0	0	0	0	0	0	0	0	0	0	0	0	0	0	0	0	0	0	0	0	0	0	0	0	0	0	0	0	0	0	0	0.0275	0	0	0	0	0
Solyc01g016910	0		0	0	0	0	0	0	0	0	0	0	0	0	0	0	0	0	0	0	0	0	0	0	0	0	0	0	0	0	0	0	0	0	0	0	0	0	0	0	0	0	0	0	0	0	0	0	0
Solyc01g016920	0.03		0	0	0	0	0	0	0	0	0	0	0	0	0	0	0	0	0	0	0	0	0	0	0	0	0	0	0	0	0	0	0	0	0	0	0	0	0	0	0	0	0	0	0	0	0	0	0
Solyc01g016930	0		0	0	0	0	0	0	0	0	0	0	0	0	0	0	0	0	0	0	0	0	0	0	0	0	0	0	0	0	0	0	0	0	0	0	0	0	0	0	0	0	0	0	0	0	0	0	0
Solyc01g016940	0.353333		0	0	0	0	0	0	0	0	0	0	0	0	0	0	0	0	0	0	0	0	0	0	0	0	0	0	0	0	0	0	0	0	0	0	0	0	0	0	0	0	0	0	0	0	0	0	0
Solyc01g016950	0.2525		0	0	0	0	0	0.0325	0.0225	0.0325	0	0	0.03	0	0.0225	0	0	0.0225	0	0	0	0.0275	0	0	0.035	0.065	0.025	0	0.0325	0	0	0	0	0.0125	0	0	0	0.05	0	0.02	0	0	0	0.025	0.025	0	0	0.08	0
Solyc01g016960	0.025		0	0	0	0	0	0	0	0	0	0	0	0	0	0	0	0	0	0	0	0	0	0	0	0	0	0	0	0	0	0	0	0	0	0	0	0	0	0	0	0	0	0	0	0	0	0	0
Solyc01g016970	102.002	Expressed	0	0.02	0.0225	0.1	0.28	0.5425	0.375	0.17	0.755	0.745	0.165	0.8875	0.6575	0.285	0.3525	1.1175	0	0.0225	0.0275	0.105	0.355	2.0925	1.7625	0.715	2.8975	5.5525	2.075	2.17	3.6	1.5225	3.5925	3.8525	0.0933333	0	0.1975	0.98	3.9075	42.06	34.89	36.1625	56.8075	35.76	34.055	17.125	14.69	21.41	21.905
Solyc01g016980	0.04		0	0	0	0	0	0	0	0	0	0	0	0	0	0	0	0	0	0	0	0	0	0	0	0	0	0	0	0	0	0	0	0	0	0	0	0	0	0	0	0	0	0	0	0	0	0	0
Solyc01g016990	0.0866667		0	0	0	0	0	0	0	0	0	0	0	0	0	0	0	0	0	0	0	0	0	0	0	0	0	0	0	0	0	0	0	0	0.0866667	0	0	0	0	0	0	0	0	0	0	0	0	0	0
Solyc01g017000	0		0	0	0	0	0	0	0	0	0	0	0	0	0	0	0	0	0	0	0	0	0	0	0	0	0	0	0	0	0	0	0	0	0	0	0	0	0	0	0	0	0	0	0	0	0	0	0
Solyc01g017010	0.03		0	0	0	0	0	0	0	0	0	0	0	0	0	0	0	0	0	0	0	0	0	0	0	0	0	0	0	0	0	0	0	0	0	0	0	0	0	0	0	0	0	0	0	0	0	0	0
Solyc01g017020	0.02		0	0	0	0	0	0	0	0	0	0	0	0	0	0	0	0	0	0	0	0	0	0	0	0	0	0	0	0	0	0	0	0	0	0	0	0	0	0	0	0	0	0	0	0	0	0	0
Solyc01g017030	0.246667		0	0	0	0	0	0	0	0	0	0	0	0	0	0	0	0	0	0.0275	0.0225	0	0	0	0	0	0	0	0	0	0	0	0	0	0	0	0.035	0	0	0	0	0	0	0	0	0	0	0	0
Solyc01g017040	0		0	0	0	0	0	0	0	0	0	0	0	0	0	0	0	0	0	0	0	0	0	0	0	0	0	0	0	0	0	0	0	0	0	0	0	0	0	0	0	0	0	0	0	0	0	0	0
Solyc01g017050	0.0733333		0	0	0	0	0	0	0	0	0	0	0	0	0	0	0	0	0	0	0	0	0	0	0	0	0	0	0	0	0	0	0	0	0	0	0	0	0	0	0	0	0	0	0	0	0	0	0
Solyc01g017060	0.21		0	0	0	0	0	0	0	0	0	0	0	0	0	0	0	0	0	0.02	0	0	0	0	0	0	0	0	0	0	0	0	0	0	0	0	0	0	0	0	0	0	0	0	0	0	0	0	0
Solyc01g017070	0.21		0	0	0	0	0	0	0	0.0325	0	0	0	0	0	0	0	0	0	0.02	0.0325	0	0	0	0	0	0	0	0	0	0	0	0	0	0	0	0	0	0	0	0	0	0	0	0	0	0	0	0
Solyc01g017080	0.025		0	0	0	0	0	0	0	0	0	0	0	0	0	0	0	0	0	0	0	0	0	0	0	0	0	0	0	0	0	0	0	0	0	0	0	0	0	0	0	0	0	0	0	0	0	0	0
Solyc01g017090	0.5225		0	0.0225	0.055	0.0275	0	0	0	0.0275	0	0	0	0	0	0.035	0	0	0	0.0275	0.095	0.05	0.045	0	0	0	0	0	0	0	0	0	0	0	0	0	0.08	0.03	0.0325	0	0	0	0.0275	0.03	0	0	0.035	0.055	0
Solyc01g017100	0.245		0	0	0	0	0	0	0	0.0275	0	0	0	0	0	0	0	0	0	0	0	0.05	0	0	0	0	0	0	0	0	0	0	0	0	0	0	0.0175	0.03	0	0	0	0	0	0	0	0	0	0	0
Solyc01g017110	0.6625		0	0.02	0	0	0	0	0	0.0275	0	0	0	0	0	0	0	0	0	0.02	0	0.0775	0.025	0	0	0	0	0	0	0	0	0	0	0	0	0	0.0675	0.0525	0	0	0	0	0	0.0275	0	0	0	0	0
Solyc01g017120	0.405		0	0.02	0	0	0	0	0	0	0	0	0	0	0	0	0	0	0	0.02	0	0	0	0	0	0	0	0	0	0	0	0	0	0	0	0	0.0875	0.0225	0	0	0	0	0	0	0	0	0	0	0
Solyc01g017130	0.465		0	0.02	0	0.025	0	0	0	0	0	0	0	0	0	0	0	0	0	0.02	0	0	0	0	0	0	0	0	0	0	0	0	0	0	0	0	0.0875	0.0225	0	0	0	0	0	0	0	0	0	0	0
Solyc01g017140	0.29		0	0	0	0.025	0	0	0	0	0	0	0	0	0	0	0	0	0	0	0	0	0	0	0	0	0	0	0	0	0	0	0	0	0	0	0.0425	0	0	0	0	0	0	0	0	0	0	0	0
Solyc01g017150	0.0325		0	0	0	0	0	0	0	0	0	0	0	0	0	0	0	0	0	0	0	0	0	0	0	0	0	0	0	0	0	0	0	0	0	0	0	0	0	0	0	0	0	0	0	0	0	0	0
Solyc01g017160	0		0	0	0	0	0	0	0	0	0	0	0	0	0	0	0	0	0	0	0	0	0	0	0	0	0	0	0	0	0	0	0	0	0	0	0	0	0	0	0	0	0	0	0	0	0	0	0
Solyc01g017170	0.12		0	0	0	0.0225	0	0	0	0	0	0	0	0	0	0	0	0	0	0.0225	0	0.0275	0	0	0	0	0.035	0	0	0	0	0	0	0	0	0.0366667	0.035	0	0	0	0.0525	0	0	0	0	0	0	0	0
Solyc01g017180	0.095		0	0	0	0.0225	0	0	0	0	0	0	0	0	0	0	0	0	0	0	0	0.0275	0	0	0	0	0.035	0	0	0	0	0	0	0	0	0.0366667	0.035	0	0	0	0.0525	0	0	0	0	0	0	0	0
Solyc01g017190	0.09		0	0	0	0.0225	0	0	0	0	0	0	0	0	0	0	0	0	0	0	0	0.0275	0	0	0	0	0.035	0	0	0	0	0	0	0	0	0.0366667	0	0	0	0	0.03	0	0	0	0	0	0	0	0
Solyc01g017200	0.0525		0	0	0	0	0	0	0	0	0	0	0	0	0.0225	0	0	0	0	0	0	0	0	0	0	0	0	0	0	0	0	0	0	0	0	0	0	0	0	0	0	0	0	0	0	0	0	0	0
Solyc01g017210	0.14		0	0	0	0	0	0	0	0	0	0	0	0	0	0	0	0	0	0	0	0	0	0	0	0	0	0	0	0	0	0	0	0	0	0	0	0	0	0.02	0.025	0	0	0	0	0	0	0	0
Solyc01g017220	3.355	Expressed	0.07	0.3725	0.905	0.25	0.205	0.155	0.035	0.0575	0.055	0.08	0.1775	0.045	0.1275	0.0875	0.1525	0.2475	0	0.7025	2.0775	1.6225	0.355	0.15	0.4775	0.1	0.0675	0.03	0	0	0	0	0.0225	0.025	0	0.166667	2.735	1.755	0.52	0.065	0.4225	0.095	0	0.9925	0	0.055	0.0625	0.065	0.0575
Solyc01g017230	0.125		0	0	0	0	0	0	0	0	0	0	0	0	0	0	0	0	0.03	0.0225	0	0	0	0	0	0	0	0	0	0	0	0	0.0275	0	0	0	0	0	0	0	0	0	0	0	0	0	0	0.0175	0
Solyc01g017240	0.3225		0	0.02	0	0.025	0	0	0.0325	0	0	0	0	0	0	0	0.03	0	0	0.02	0	0	0	0	0	0	0	0	0	0	0	0	0	0	0.0233333	0	0.06	0.0225	0	0	0.025	0.0275	0	0.03	0.0275	0	0	0	0
Solyc01g017250	0.3225		0	0.02	0	0.025	0	0	0.0325	0	0	0	0	0	0	0	0.03	0	0	0.02	0	0	0	0	0.03	0	0	0	0	0	0	0	0	0	0.0233333	0	0.0775	0.0225	0	0	0.0525	0.0275	0	0.03	0.0275	0	0	0	0
Solyc01g017260	0		0	0	0	0	0	0	0	0	0	0	0	0	0	0	0	0	0	0	0	0	0	0	0	0	0	0	0	0	0	0	0	0	0	0	0	0	0	0	0	0	0	0	0	0	0	0	0
Solyc01g017270	0.0333333		0	0	0	0	0	0	0	0	0	0	0	0	0	0	0	0	0	0	0	0	0	0	0	0	0	0	0	0	0	0	0	0	0	0	0	0	0	0	0	0	0	0	0	0	0	0	0
Solyc01g017280	0.06		0	0	0	0	0	0	0	0	0	0	0	0	0	0	0	0	0	0	0	0	0	0	0	0	0	0	0	0	0	0	0	0	0	0	0.0175	0	0	0	0	0	0	0	0	0	0	0	0
Solyc01g017290	0.13		0	0	0	0	0	0	0	0	0	0	0	0	0	0	0	0	0	0	0	0	0	0	0	0	0	0	0	0	0	0	0	0	0	0	0.0175	0	0	0	0	0	0	0	0	0	0	0	0
Solyc01g017300	2.4675	Expressed	0	0.3	0.055	0.245	0	0	0.0225	0.0325	0	0.025	0.03	0	0.03	0.105	0	0.08	0	0.62	0.175	0.0275	0.025	0	0.0275	0	0	0	0.0325	0	0	0	0	0.0325	0	0	0.3525	0.12	0	0.09	0.0725	0.0425	0	0.105	0.135	0.0325	0.035	0	0
Solyc01g017310	0.8825		0	0.2075	0.055	0.1225	0	0	0	0	0	0	0	0	0	0.0575	0	0.0225	0	0.3225	0.0475	0	0	0	0.0275	0	0	0	0	0	0	0	0	0	0.03	0	0.225	0.055	0	0	0.0275	0	0	0.105	0	0	0	0	0
Solyc01g017320	0.925		0	0.2225	0.055	0.1225	0	0	0	0	0	0	0	0	0	0.0575	0	0.0225	0	0.3325	0.0475	0	0	0	0.0275	0	0	0	0	0	0	0	0	0	0.03	0	0.225	0.055	0	0	0.0275	0	0	0.105	0	0	0	0	0
Solyc01g017330	0.5275		0	0.095	0.025	0.0525	0	0	0	0	0	0	0	0	0	0.0575	0	0.0225	0	0.1275	0.0475	0	0	0	0.0275	0	0	0	0	0	0	0	0	0	0.03	0	0.0175	0	0	0	0.0275	0	0	0.055	0	0	0	0	0
Solyc01g017340	0.3275		0	0.0225	0	0.025	0.0325	0	0	0	0	0	0	0	0	0	0	0	0.03	0.125	0	0	0	0	0	0	0	0	0	0	0	0	0	0	0	0	0.025	0	0	0	0.1975	0	0	0.03	0	0.02	0	0.0225	0
Solyc01g017350	0.71		0	0.045	0.03	0.05	0	0	0	0	0	0	0	0	0	0	0	0	0	0.18	0.025	0.0275	0	0	0	0	0	0	0	0	0	0	0	0.025	0	0	0	0	0	0	0.1425	0	0	0	0.03	0.02	0	0.0225	0
Solyc01g017360	0.2675		0	0.02	0.0825	0.0725	0	0	0	0	0	0.0325	0	0	0	0	0	0	0	0.09	0.0225	0	0	0	0	0	0.035	0	0	0	0	0	0	0.0125	0	0	0.05	0	0	0	0.025	0	0	0.0625	0.0275	0	0	0.0225	0
Solyc01g017370	2.185	Expressed	0	0.09	0	0.0725	0	0	0	0	0	0.0325	0	0	0	0	0	0.03	0	0.2275	0.025	0.0525	0	0	0.0325	0	0	0.025	0	0	0	0	0	0.055	0.0466667	0.21	0.025	0.05	0.0325	0	0.0575	0	0	0	0.0725	0.0225	0	0	0
Solyc01g017380	2.305	Expressed	0	0.115	0	0.1175	0	0	0.035	0	0	0	0	0	0	0	0	0.03	0	0.3225	0.025	0	0	0	0.0325	0	0	0.025	0.035	0	0	0	0	0.055	0.0766667	0.21	0	0.055	0.0325	0	0.0275	0	0	0.025	0.0725	0.0225	0	0	0
Solyc01g017390	0.665		0	0.0225	0	0.0675	0	0	0.035	0	0	0	0	0	0	0	0	0	0	0.1425	0	0	0	0	0	0	0	0	0.035	0	0	0	0	0.0125	0.0766667	0.0433333	0	0.0275	0	0	0	0	0	0.025	0	0	0	0	0
Solyc01g017400	0.125		0	0	0	0	0	0	0	0	0	0	0	0	0	0	0	0	0	0.055	0	0	0	0	0	0	0	0	0	0	0	0	0	0	0	0	0	0	0	0	0	0	0	0	0	0	0	0	0
Solyc01g017410	0.0525		0	0.0325	0	0	0	0	0	0	0	0	0	0	0	0	0	0	0	0	0	0	0	0	0	0	0	0	0	0	0	0	0	0	0	0	0	0	0	0	0	0	0	0	0.03	0	0	0	0
Solyc01g017420	0.3125		0	0	0	0	0	0	0	0	0	0	0	0	0	0	0	0	0	0.06	0	0	0	0	0.0325	0	0	0	0	0	0	0	0	0	0	0	0	0.0225	0	0	0	0	0	0	0	0	0	0.025	0
Solyc01g017430	0.0225		0	0	0	0	0	0	0	0	0	0	0	0	0	0	0	0	0	0	0	0	0	0	0	0	0	0	0	0	0	0	0	0	0	0	0	0	0	0	0	0	0	0	0	0	0	0	0
Solyc01g017440	0.23		0.04	0	0	0	0	0	0	0	0	0	0	0	0	0	0	0	0	0.0325	0	0	0	0	0	0	0	0	0	0	0	0.0275	0	0	0	0.0433333	0.0425	0	0.065	0	0.025	0	0	0	0	0	0	0	0
Solyc01g017450	0.23		0.04	0	0	0	0	0	0	0	0	0	0	0	0	0	0	0	0	0	0	0	0	0	0	0	0	0	0	0	0	0	0	0	0	0.0433333	0	0	0	0	0.025	0	0	0	0	0	0	0	0
Solyc01g017460	2.555	Expressed	0	0.0975	0.025	0.1	0.0325	0	0.0225	0	0	0	0.06	0	0	0	0.0225	0.03	0	0.1975	0.0325	0	0.0675	0	0	0	0.0325	0	0	0	0	0	0	0.045	0.0466667	0	0	0.03	0.0325	0.02	0.155	0.0525	0	0.025	0.05	0.0425	0	0.0225	0
Solyc01g017470	0.115		0	0	0	0	0	0	0	0	0	0	0	0	0	0	0	0	0	0.0225	0	0	0.0225	0	0	0	0	0	0	0	0	0	0	0	0.0466667	0	0	0	0	0	0	0	0	0	0	0	0	0	0
Solyc01g017480	0.0275		0	0	0	0	0	0	0	0	0	0	0	0	0	0	0	0	0	0	0	0	0	0	0	0	0	0.015	0	0	0	0	0	0	0	0	0	0	0	0	0	0	0	0	0	0	0.0275	0	0
Solyc01g017490	0.4925		0	0.065	0.0775	0.075	0	0	0	0	0	0	0	0	0	0	0	0.03	0	0.275	0.055	0	0	0	0	0	0	0	0	0	0	0.03	0	0.05	0	0	0.145	0	0	0	0.03	0	0	0	0	0	0	0.0225	0
Solyc01g017500	0.06		0	0.0325	0	0	0	0	0	0	0	0	0	0	0	0	0.03	0	0	0.06	0.0275	0	0	0	0	0	0	0	0	0	0	0	0	0	0	0	0.0425	0	0	0	0	0	0	0	0	0	0	0	0
Solyc01g017510	0.3425		0	0.0325	0	0	0	0	0	0	0	0	0	0	0	0	0	0	0	0.0225	0	0	0	0	0	0	0	0	0	0	0	0	0	0	0	0	0.0175	0.0225	0	0	0	0	0	0	0.03	0	0	0	0
Solyc01g017520	0.155		0	0.02	0	0.0475	0	0	0	0	0	0	0	0	0	0	0	0	0	0.05	0	0	0	0	0	0	0	0	0	0	0	0	0	0.0125	0	0.0433333	0	0.0275	0	0	0	0.0225	0	0	0	0	0	0	0
Solyc01g017530	0.9075		0	0.1525	0.155	0.025	0.0575	0.03	0	0.0275	0	0.0325	0	0.0475	0	0	0.03	0.0525	0	0.0975	0	0.0275	0	0	0.035	0	0	0	0	0	0.0275	0	0	0	0	0	0.1275	0.0775	0.0975	0.02	0.0275	0.0725	0.03	0.3275	0	0.0225	0	0	0
Solyc01g017540	0.0375		0	0	0	0	0	0	0	0	0	0	0	0	0	0	0	0	0	0	0	0	0	0	0	0	0	0	0	0	0	0	0	0	0	0	0.0375	0	0	0	0	0	0	0	0	0	0	0	0
Solyc01g017550	0.2775		0	0	0	0	0	0	0	0	0.0275	0	0	0.0225	0	0	0	0	0	0	0	0.025	0	0	0	0	0	0	0	0	0	0	0	0	0	0	0.025	0	0	0	0	0	0	0	0	0	0	0	0
Solyc01g017560	0.123333		0	0	0	0	0	0	0	0	0	0	0	0	0	0	0	0	0	0	0.025	0	0	0	0	0	0	0	0	0	0.0275	0	0	0	0	0	0	0	0	0	0	0	0	0	0	0	0	0	0
Solyc01g017570	0.603333		0	0	0	0.025	0	0	0	0	0.05	0.0975	0	0.0225	0.0225	0	0	0.0225	0	0.0625	0	0	0	0	0	0	0.0325	0	0	0	0	0.0525	0	0	0	0	0.0425	0	0	0.09	0.0475	0	0	0.0325	0.05	0	0	0.025	0
Solyc01g017580	0		0	0	0	0	0	0	0	0	0	0	0	0	0	0	0	0	0	0	0	0	0	0	0	0	0	0	0	0	0	0	0	0	0	0	0	0	0	0	0	0	0	0	0	0	0	0	0
Solyc01g017590	14.89	Expressed	0.31	1.7325	0.12	0	0.1075	0.1375	0.1125	0.095	0.14	0.0325	0.13	0.065	0.0825	0.0225	0.025	0.205	0.78	2.2575	0.295	0.0775	0.1275	0.12	0.065	0.355	0.2675	0.21	0.15	0.11	0.0825	0.0525	0.17	0.0925	0.2	14.89	0.32	0.3575	0.1925	0.3775	0.4	0.1	0.115	0.1425	0.2225	0.1275	0.19	0.0525	0.165
Solyc01g017600	64.1367	Expressed	64.1367	7.1175	0.145	0.2475	0	0.085	0.0575	0.06	0.0275	0.0325	0	0.095	0.0225	0.035	0.025	0.0275	12.11	8.1625	1.655	0.6325	0.1525	0.115	0.03	0.0575	0.095	0	0.11	0.045	0	0.095	0.0225	0.0475	0.0866667	0	0.085	0.05	0.9925	0.065	0.08	0	0	0	0	0.0225	0	0	0
Solyc01g017610	0.0366667		0	0	0	0	0	0	0	0	0	0.0325	0	0	0	0	0	0	0	0	0	0	0	0	0	0	0	0	0	0	0	0	0	0	0	0	0	0	0	0	0	0	0	0	0	0	0	0	0
Solyc01g017620	0		0	0	0	0	0	0	0	0	0	0	0	0	0	0	0	0	0	0	0	0	0	0	0	0	0	0	0	0	0	0	0	0	0	0	0	0	0	0	0	0	0	0	0	0	0	0	0
Solyc01g017630	0.03		0	0	0	0	0	0	0	0	0	0	0	0	0	0	0	0	0	0	0	0	0	0	0	0	0	0	0	0	0	0	0	0	0	0	0	0	0	0	0	0	0	0	0	0	0	0	0
Solyc01g017640	0.07		0	0	0	0	0	0	0	0	0	0	0	0	0	0	0	0	0	0	0	0	0	0	0	0	0	0	0	0	0	0	0	0	0	0	0	0	0	0	0	0	0	0	0	0	0	0	0
Solyc01g017650	0.035		0	0	0	0	0	0	0	0	0	0	0	0	0	0	0	0	0	0	0	0	0	0	0	0	0	0	0	0	0	0	0	0	0	0	0	0	0	0	0	0	0	0	0	0	0	0	0
Solyc01g017660	0.025		0	0	0	0	0	0	0	0	0	0	0	0	0	0	0	0	0	0	0	0	0	0	0	0	0	0	0	0	0	0	0	0	0	0	0	0	0	0	0	0	0	0	0	0	0	0	0
Solyc01g017670	0.0366667		0	0	0	0	0	0	0	0	0	0	0	0	0	0	0	0	0	0	0	0	0	0	0	0	0	0	0	0	0	0	0	0	0	0	0	0	0	0	0	0	0	0	0	0	0	0	0
Solyc01g017680	0.0666667		0	0	0	0	0	0	0	0	0	0	0	0	0	0	0	0	0	0	0	0	0	0	0	0	0	0	0	0	0	0	0	0	0	0	0	0	0	0	0	0	0	0	0	0	0	0	0
[truncated: 32,885 more rows]
[truncated: 86 more columns]
