# Supplementary material for: High-resolution spatiotemporal transcriptome mapping of tomato fruit development and ripening
Source: Nat Commun. 2018 Jan 25;9:364. doi: 10.1038/s41467-017-02782-9 (PMC5785480; doi:10.1038/s41467-017-02782-9)
Supplement: Supplementary file 7 — Supplementary Data 4 [file 41467_2017_2782_MOESM7_ESM.xlsx]

## Sheet: Supplementary Data 4
			Supplementary Data 4. Standard errors of gene expression in fruit tissue/cell-types.
Gene	Max aveRPM among all samples	Expressed (Max aveRPM ≥ 1)	Standard error of RPM in fruit major six tissues among biological replicates (n = 3 for * and 4 for others)
			Total pericarp Anthesis*	Total pericarp 5 DPA	Total pericarp 10 DPA	Total pericarp 20 DPA	Total pericarp 30 DPA	Total pericarp MG-stem	Total pericarp MG-equatorial	Total pericarp MG-stylar	Total pericarp Br-stem	Total pericarp Br-equatorial	Total pericarp Br-stylar	Total pericarp Pk-stem	Total pericarp Pk-equatorial	Total pericarp Pk-stylar	Total pericarp LR	Total pericarp RR	Septum Anthesis*	Septum 5 DPA	Septum 10 DPA	Septum 20 DPA	Septum 30 DPA	Septum MG-stem	Septum MG-equatorial	Septum MG-stylar	Septum Br-stem	Septum Br-equatorial	Septum Br-stylar	Septum Pk-stem	Septum Pk-equatorial	Septum Pk-stylar	Septum LR	Septum RR	Locular tissue Anthesis*	Locular tissue 5 DPA*	Locular tissue 10 DPA	Locular tissue 20 DPA	Locular tissue 30 DPA	Locular tissue MG-stem	Locular tissue MG-equatorial	Locular tissue MG-stylar	Locular tissue Br-Stem	Locular tissue Br-equatorial	Locular tissue Br-stylar	Locular tissue Pk-stem	Locular tissue Pk-equatorial	Locular tissue Pk-stylar	Locular tissue LR
Solyc00g005000	66.0925	Expressed	0	0	0	0	0.0337577	0.243208	0.0492443	0.184526	0.0248328	0.0613732	0.0520216	0.0225	0.045	0	0	0	0	0	0	0.0317543	0.0968676	0.617508	0.441267	0.287587	0.122644	0.0533073	0.0902196	0.0225	0.0325	0.0275	0	0.025	0	0	0	0	0.0377492	0.292614	0.310681	0.190853	0	0	0.03	0	0	0.025	0
Solyc00g005020	0.3525		0	0	0	0	0	0	0.0225	0	0	0	0	0	0.0225	0	0	0	0	0	0	0	0	0	0	0	0	0	0	0	0	0	0	0	0	0	0.0471478	0.0309233	0.0325	0.0425	0.0275	0.06	0.05	0	0.03	0.0440643	0	0.0275	0.0417333
Solyc00g005040	11.7425	Expressed	0.200859	0.229324	0.411367	0.510882	0.494947	0.743421	0.83319	0.229905	0.393637	0.825645	0.523132	0.579243	0.738178	0.399278	0.276025	0.353871	0.584494	0.366478	0.0625833	0.710516	0.623129	0.31274	0.904756	0.886632	0.427882	0.828779	0.782926	0.719634	0.638623	0.564011	0.127443	0.75188	0.0933333	0.0666667	0.188038	0.318365	0.140853	0.41139	0.659853	0.711329	0.496076	0.410231	0.607404	0.256483	0.658761	0.408827	1.04889
Solyc00g005050	88.08	Expressed	1.81347	1.66573	3.00237	2.1268	1.99996	1.80509	1.2959	1.76608	1.16501	1.88128	0.8575	1.59025	3.47527	1.64047	2.74754	0.418818	2.00355	1.77061	2.78203	2.40568	1.63952	3.52211	3.99917	3.84258	3.8655	3.18887	4.89022	1.48735	4.4706	1.34442	4.24036	4.88701	0.316719	2.24185	1.18366	3.314	2.24741	1.31185	2.35377	3.80909	0.552645	0.860711	0.902832	2.16159	2.25244	0.928075	0.771352
Solyc00g005060	0		0	0	0	0	0	0	0	0	0	0	0	0	0	0	0	0	0	0	0	0	0	0	0	0	0	0	0	0	0	0	0	0	0	0	0	0	0	0	0	0	0	0	0	0	0	0	0
Solyc00g005070	0.225		0	0	0	0	0	0	0	0	0	0	0	0	0	0.0275	0	0	0	0	0	0	0	0	0	0	0	0	0	0	0	0	0	0	0	0	0	0	0	0	0	0	0	0	0.025	0	0	0	0
Solyc00g005080	10.3775	Expressed	0	0.0368273	0	0.0249583	0	0.03	0	0.03	0	0.0325	0.0275	0	0.03	0.035	0	0.0225	0	0.1625	0.0348807	0.025	0.025	0.0625	0	0	0.0606046	0	0.0325	0.0225	0	0	0	0	0	0	0.0643396	0.0442295	0.0675	0.0636887	0.045	0.0517204	0.0291548	0	0.025	0.02	0.0390246	0.0225	0.0225
Solyc00g005090	0.0275		0	0	0	0	0	0	0	0	0	0	0	0	0	0	0	0	0	0	0	0	0	0	0	0	0	0	0	0	0	0	0	0	0	0	0	0	0	0	0	0	0	0	0	0	0	0	0
Solyc00g005100	0.0225		0	0	0	0.0225	0	0	0	0	0	0	0	0	0	0	0	0	0	0	0	0	0	0	0	0	0	0	0	0	0	0	0	0	0	0	0	0	0	0	0	0	0	0	0	0	0	0	0
Solyc00g005110	0.135		0	0	0	0	0	0	0	0	0	0	0	0	0	0	0	0	0	0	0	0	0	0	0	0	0	0	0	0	0	0	0	0	0	0	0.05	0	0	0	0	0	0	0	0	0	0	0	0
Solyc00g005120	0.795		0	0	0	0.045	0	0.045	0.07	0.0810735	0.0275	0.025	0.0291548	0	0	0	0.03	0.034641	0	0	0	0.0470815	0.043589	0.108972	0.0777817	0.0193111	0.0424264	0.0730725	0.0903235	0.0225	0.02	0	0.0275	0.035	0	0	0	0.0520216	0.0317543	0.0404918	0.0275	0.0655744	0.0475	0.0298259	0.025	0.065	0.0920598	0.0275	0.0375
Solyc00g005130	0.38		0	0	0	0	0.025	0	0.0924662	0.0828025	0.0525	0	0.034641	0	0.0225	0	0	0.0332603	0	0	0	0.025	0.0275	0.0596343	0.057373	0.0497284	0	0	0	0.045	0.02	0	0	0.0225	0	0	0	0	0	0	0.0332603	0.06	0	0.0361421	0.0275	0.0246221	0.0648556	0.025	0.0357071
Solyc00g005140	0.66		0	0	0	0.025	0.065	0	0.0477842	0.0517204	0.0275	0.065	0.0574456	0	0.0225	0	0.05	0.0488194	0	0	0	0.0303795	0	0.0801561	0.0806742	0.0778219	0	0.0471699	0.0337577	0.0368273	0.060329	0.0280995	0.0442295	0.0440407	0	0	0	0	0	0.0275	0.0332603	0.02	0.03	0.225647	0.0303795	0.023094	0.0875	0.142624	0.176983
Solyc00g005150	0.465		0.04	0.146884	0.0210159	0.0409013	0.0794775	0.0225	0.0347311	0.0325	0.0317543	0.0510514	0.0515388	0.0225	0.03	0.0291548	0.0518009	0.0777817	0	0.02529	0.0543139	0.0259808	0.0606218	0.0361421	0	0.0279881	0.05058	0.0510514	0.0627827	0.045	0.0532877	0.02	0	0.0634265	0	0	0.10116	0.0686021	0.0552268	0.0349702	0.113652	0.0525	0.0275	0.0674537	0.025	0.0490748	0.0275	0	0.0204124
Solyc00g005160	0.0325		0	0	0	0	0.025	0	0	0	0	0	0	0	0	0	0	0	0	0	0	0	0	0	0	0	0	0	0	0	0	0	0	0	0	0	0	0	0	0	0	0	0	0	0	0	0	0	0
Solyc00g005170	0.0775		0	0	0	0	0	0	0	0	0	0	0	0	0	0	0	0	0	0	0	0.025	0	0	0	0	0	0	0	0	0	0	0	0	0	0	0	0	0	0	0	0	0	0	0	0	0	0	0
Solyc00g005180	0.28		0	0	0	0	0	0	0	0	0	0	0	0	0	0	0	0	0	0	0.0325	0	0	0	0	0	0	0	0	0.0225	0	0	0.0593015	0	0	0	0.023585	0.0275	0	0	0	0	0	0	0	0	0	0	0
Solyc00g005280	0.0425		0	0	0	0	0	0	0	0	0	0	0	0	0	0	0	0	0	0	0	0	0	0	0.0275	0	0	0	0	0	0	0	0	0	0	0	0	0	0	0	0	0.0246221	0	0	0	0.0225	0	0.025	0
Solyc00g005420	0.0175		0	0	0	0	0	0	0	0	0	0	0	0	0	0	0	0	0	0	0	0	0	0	0	0	0	0	0	0	0	0	0	0	0	0	0	0	0	0	0	0	0	0	0	0	0	0	0
Solyc00g005430	20.21	Expressed	0	0.0383786	0.0638194	0.179188	0.255131	0.154616	0.199374	0.0994569	0.0819044	0.113017	0.0310913	0.0822977	0.0292617	0.1425	0.072385	0.0332603	0	0.02	0.186072	0.226288	0.531105	0.288859	0.232845	0.218289	0.0545245	0.0514782	0.370099	0	0.0275	0.0320156	0	0.0125	0	0	0.353483	0.781925	2.59388	0.418101	1.77931	0.85415	0.139523	0.318077	0.113899	0.0440643	0.055	0.0239357	0
Solyc00g005440	2.4575	Expressed	0.0766667	0.199937	0.246052	0.1248	0.0521217	0.0924662	0.0612883	0.0618466	0.0317543	0.0590727	0.0697615	0.0234521	0.0590727	0.0735414	0.0320156	0.120623	0.0608276	0.0897566	0.233417	0.131498	0.0291548	0.0558271	0.15465	0.0361421	0.07	0.0388104	0.0514782	0.0425	0.0348807	0.035678	0.0332603	0.0125	0.0166667	0.145182	0.22756	0.0983192	0.0750555	0.0578072	0.0147196	0.0510514	0.0663953	0.205771	0.0288675	0.0781558	0.0390246	0.0724569	0.0217466
Solyc00g005450	0.025		0	0	0	0	0	0	0	0	0	0	0	0	0	0	0	0	0	0	0	0	0	0	0	0	0	0	0	0	0	0	0	0	0	0	0	0	0	0	0	0	0	0	0	0	0	0	0
Solyc00g005460	0.03		0	0	0	0	0	0	0	0	0	0	0	0	0	0	0	0	0	0	0	0	0	0	0	0	0	0	0	0	0	0	0	0	0	0	0	0	0	0	0	0	0	0	0	0	0	0	0
Solyc00g005470	0.03		0	0	0	0	0	0	0	0	0	0	0	0	0	0	0	0	0	0	0	0	0	0	0	0	0	0	0	0	0	0	0	0	0	0	0	0	0	0	0	0	0	0	0	0	0	0	0
Solyc00g005480	0.02		0	0	0	0	0	0	0	0	0	0	0	0	0	0	0	0	0	0	0	0	0	0	0	0	0	0	0.02	0	0	0	0	0	0	0	0	0	0	0	0	0	0	0	0	0	0	0	0
Solyc00g005490	0.4125		0	0	0	0	0	0	0	0	0	0	0	0	0	0	0	0	0	0	0	0	0	0	0	0	0	0	0	0	0	0	0	0	0	0	0	0.0332603	0	0	0.025	0	0	0	0.03	0	0	0	0
Solyc00g005840	54.8667	Expressed	5.7521	2.04442	2.49136	0.901905	1.12093	4.03382	2.70976	1.31247	0.517275	1.28624	2.62461	1.89812	1.14439	0.330895	0.791458	0.752922	4.17172	1.07759	1.34266	2.52997	1.24497	1.19112	0.918362	1.49961	2.81989	0.862453	0.857681	0.561328	0.625373	0.696856	0.888397	0.769723	4.3101	4.73123	1.34282	1.86959	2.25568	0.403121	0.988526	1.29962	0.200354	0.398142	0.585297	0.347548	0.231679	0.256722	0.440312
Solyc00g005850	0.5175		0	0	0.025	0.0392641	0.0794775	0.0437798	0.113505	0.0712244	0.0592312	0.155134	0.0595819	0.130671	0.104083	0.122091	0.132626	0.0543714	0	0.0325	0.0462781	0.0906803	0.102021	0.0545245	0.106409	0.125366	0.0738664	0.0266145	0.0627661	0.0290115	0.0325	0.0368273	0.0515388	0	0	0	0.02529	0.0479583	0.0922858	0.0961336	0.187194	0.0365148	0.066128	0.0629153	0.0429146	0.0425	0.0404145	0.0436606	0.0354436
Solyc00g005860	0.233333		0.04	0.0570088	0.0288675	0.0253311	0.0275	0.0225	0.0225	0.0275	0	0.0308221	0.0225	0	0	0.0225	0	0	0.141931	0	0	0.0303795	0	0.03	0.0532291	0.0325	0.0337577	0.03	0.035	0.0246221	0.02	0	0	0.0478714	0	0	0.0375	0.0225	0	0.0225	0.0525	0.0275	0	0	0	0	0.0275	0.0275	0
Solyc00g005870	0.2025		0	0	0.0525	0	0	0	0	0	0	0	0.0273861	0	0	0.0275	0	0	0.03	0	0.0275	0.0303795	0.0337577	0	0	0	0.025	0	0.0425	0	0	0	0	0	0.0866667	0	0.0375	0	0	0.0425	0.066128	0.0225	0	0	0.025	0.0225	0	0	0.0225
Solyc00g005880	0.0775		0	0	0	0.025	0.0325	0	0	0.0275	0	0	0	0.0225	0.0225	0	0	0.0332603	0	0	0.0275	0.025	0	0	0	0	0	0	0	0	0	0	0.03	0	0	0	0	0	0.0325	0.041508	0	0.02	0	0	0.03	0	0	0	0.0475
Solyc00g005890	2.83667	Expressed	0	0.0259808	0	0	0	0	0	0	0	0	0	0	0	0	0	0	0	0.0225	0	0	0	0	0	0	0	0	0	0	0	0	0	0	0.0272845	0.36	0.025	0	0.0325	0	0	0	0	0	0	0	0	0	0
Solyc00g005900	0.0525		0	0	0	0	0	0	0	0	0	0	0	0	0	0	0	0	0	0	0	0	0	0	0	0	0	0	0	0	0	0	0	0	0	0	0	0	0	0	0	0	0	0	0	0	0	0	0
Solyc00g005980	0.055		0	0	0	0	0	0	0	0	0	0	0	0	0	0	0	0	0	0	0	0	0	0	0	0	0	0	0	0	0	0	0	0	0	0	0	0	0	0	0	0	0	0	0	0	0	0	0
Solyc00g006010	0.0325		0	0	0	0	0	0	0	0	0	0	0	0	0	0	0	0	0	0	0	0	0	0	0	0	0	0	0	0	0	0	0	0	0	0	0	0	0	0	0	0	0	0	0	0	0	0	0
Solyc00g006020	0.055		0	0	0	0	0	0	0	0	0	0	0	0	0	0	0	0	0	0	0	0	0	0	0	0	0	0	0	0	0	0	0	0	0	0	0	0	0	0	0	0	0	0	0	0	0	0	0
Solyc00g006050	0.0475		0	0	0	0	0	0	0	0	0	0	0	0	0	0	0	0	0	0	0	0	0	0	0.0325	0	0	0	0	0	0	0	0	0	0	0	0	0	0	0	0.0225	0	0	0	0	0	0	0	0.0225
Solyc00g006090	0.035		0	0	0	0	0	0	0	0	0	0	0	0	0	0	0	0	0	0	0	0	0	0	0	0	0	0	0	0	0	0	0	0	0	0	0	0	0	0	0.0275	0	0	0	0	0	0.035	0	0
Solyc00g006170	0.02		0	0	0	0	0	0	0	0	0	0	0	0	0	0	0	0	0	0	0	0	0	0	0	0	0	0	0	0	0	0	0	0	0	0	0	0	0	0	0	0	0	0	0	0	0	0	0
Solyc00g006250	0.0275		0	0	0	0	0	0	0	0	0	0	0	0	0	0	0	0	0	0	0	0	0	0	0	0	0	0	0	0	0	0	0	0	0	0	0	0	0	0	0	0	0.0275	0	0	0	0	0	0
Solyc00g006470	10.1	Expressed	0.0633333	0.286134	0.0452769	0.129896	0.0646787	0.0547723	0.0587367	0.0317543	0.0575905	0.0287228	0.0375	0.045	0.015	0.0543139	0.0872138	0.0848528	0.031798	0.250878	0.0660177	0.0970717	0.0225	0	0.0330404	0	0	0.0525	0.02	0	0.0639661	0.0425	0.0275	0.0612883	0.373333	0.0272845	0.428221	0.133627	0.0361421	0.0581664	0	0.0940744	0.0525	0.0603462	0.0513971	0.0814964	0.0508879	0.0310913	0.0440643
Solyc00g006480	0.03		0	0	0	0	0	0	0	0	0	0	0	0	0	0	0	0	0	0	0	0	0	0	0	0	0	0	0	0	0	0	0	0	0	0	0	0	0	0	0	0	0	0	0	0	0	0	0
Solyc00g006490	63.5575	Expressed	1.53334	0.882396	1.11346	0.83487	1.2744	0.880346	1.30304	1.03652	0.87731	0.588379	1.44026	1.72357	2.74558	1.30904	1.0164	0.788367	1.34122	1.97506	1.59495	1.74263	0.830567	1.17808	2.22326	1.13482	1.86301	0.218899	0.688586	0.880956	1.95769	1.06115	1.37529	1.94713	0.777439	0.791223	0.966457	0.998394	2.56058	0.634618	1.48461	1.22451	1.05066	2.14797	0.556123	1.37115	0.511491	0.810498	1.42598
Solyc00g006500	0.0225		0	0	0	0	0	0	0	0	0	0	0	0	0	0	0	0	0	0	0	0	0	0	0	0	0	0	0	0	0	0	0	0	0	0	0	0	0	0	0	0	0	0	0	0	0	0	0
Solyc00g006510	0.085		0	0	0	0	0	0	0	0	0	0	0	0	0	0	0	0	0	0	0	0	0	0	0	0	0	0	0	0	0	0	0	0	0	0	0	0	0	0	0	0	0	0	0.03	0	0	0	0
Solyc00g006520	0.085		0	0	0	0	0	0	0	0	0	0	0	0	0	0	0	0	0	0	0	0	0	0	0	0	0	0	0	0	0	0	0	0	0	0	0	0	0	0	0	0	0	0	0.03	0	0	0	0
Solyc00g006530	0.0675		0	0	0	0	0	0	0	0	0	0	0	0	0	0	0	0	0	0	0	0	0	0	0	0	0	0	0	0	0	0	0	0	0	0	0	0	0	0	0	0	0	0	0	0	0	0	0
Solyc00g006540	0.21		0	0	0	0	0	0	0	0	0	0	0	0	0	0	0	0	0	0	0	0.025	0.0325	0	0	0	0	0	0	0	0	0	0	0	0	0	0.0522813	0.0275	0	0	0.0225	0	0	0	0	0	0	0	0
Solyc00g006550	0.236667		0	0	0	0	0	0	0	0	0	0	0	0	0	0	0	0	0	0	0	0	0	0	0	0	0	0	0	0	0	0	0	0	0	0	0	0	0	0	0	0	0	0	0	0	0	0	0
Solyc00g006560	0.236667		0	0	0	0	0	0	0	0	0	0	0	0	0	0	0	0	0	0	0	0	0	0	0	0	0	0	0	0	0	0	0	0	0	0	0	0	0	0	0	0	0	0	0	0	0	0	0
Solyc00g006570	0		0	0	0	0	0	0	0	0	0	0	0	0	0	0	0	0	0	0	0	0	0	0	0	0	0	0	0	0	0	0	0	0	0	0	0	0	0	0	0	0	0	0	0	0	0	0	0
Solyc00g006590	0.59		0	0	0.025	0	0	0	0	0	0	0	0	0.0275	0	0.035	0	0.0314576	0	0.0325	0	0	0	0	0	0.025	0	0	0	0.02	0.055	0.041508	0	0	0	0	0.0314576	0.0291548	0	0	0	0	0.0500625	0	0	0.0404918	0	0	0.05
Solyc00g006600	0.1725		0	0.0475	0.045712	0.0253311	0.0325	0.0225	0	0	0.0275	0	0	0	0	0.0225	0	0.0309233	0	0.0275	0.0325	0	0	0	0	0	0	0.025	0	0	0	0	0	0	0	0	0.0923196	0.0275	0.0361421	0	0	0.0275	0	0.0453459	0	0	0	0	0
Solyc00g006630	1.3725	Expressed	0	0	0	0	0	0	0	0	0	0	0	0	0	0	0	0	0	0	0	0	0	0	0	0	0	0	0.02	0	0	0	0	0	0	0	0	0	0	0.0425	0.0625	0.0755397	0.0332603	0.0348807	0	0.0425	0	0	0.025
Solyc00g006650	0.0525		0	0	0	0	0	0	0	0	0	0	0	0	0	0	0	0	0	0	0	0	0	0	0	0	0	0	0	0	0	0	0	0	0	0	0	0	0	0	0	0	0	0	0	0	0	0	0
Solyc00g006660	0.0433333		0	0	0	0	0	0	0	0	0	0	0	0	0	0	0	0	0	0	0	0	0	0	0	0	0	0	0	0	0	0	0	0	0	0.0433333	0	0	0	0	0	0	0	0	0	0	0	0	0
Solyc00g006670	0.285		0.04	0	0	0	0.0275	0	0	0	0	0	0	0	0	0	0	0	0	0.02	0	0	0	0	0	0	0	0.03	0	0	0.02	0	0	0	0	0.0433333	0.0175	0	0	0	0.025	0	0	0.025	0	0	0.0275	0	0
Solyc00g006680	0.035		0	0	0	0	0	0	0	0	0	0	0	0	0	0	0	0	0	0	0	0	0	0	0	0	0	0	0	0	0	0	0	0	0	0	0	0	0	0	0	0	0	0	0	0	0	0	0
Solyc00g006690	0.0733333		0	0	0	0	0	0	0	0	0	0	0	0	0	0	0	0	0	0	0	0	0	0	0	0	0	0	0	0	0	0	0	0	0	0.0433333	0	0	0	0	0	0	0	0	0	0	0	0	0
Solyc00g006700	0.253333		0	0.0582201	0	0	0	0	0.0327872	0	0	0	0.0275	0	0.0309233	0	0	0	0.0333333	0	0	0	0	0.06	0.0325	0	0.035	0	0.02	0.045	0.0280995	0.0422295	0	0.043589	0.0233333	0	0.0175	0	0.03	0	0	0.0225	0	0.025	0.03	0.0404918	0.0275	0.0225	0
Solyc00g006800	669.237	Expressed	27.7492	5.12136	3.75818	5.59541	3.38919	8.90842	4.79324	5.58374	7.93816	8.0387	5.91356	5.80944	8.65771	6.58258	10.6447	2.93043	24.437	3.72788	11.1442	12.5627	9.30602	7.04105	9.75098	5.30783	8.0186	15.484	7.40708	3.64128	7.1034	7.22725	11.674	6.99061	4.6054	2.31529	6.53581	8.69734	12.639	6.92314	4.09297	6.68828	5.27885	10.9428	5.19649	8.61182	3.4538	3.36721	6.18719
Solyc00g006810	55.4525	Expressed	1.97716	1.43381	1.64938	1.88123	1.43779	1.35174	0.993918	0.95838	1.47572	1.57687	1.05652	2.38969	0.462727	1.25638	2.23921	1.92815	2.32099	2.09502	1.42147	0.99738	0.497617	0.401567	1.1154	1.5626	1.80997	0.55938	1.35009	0.447791	0.839607	1.737	1.27002	3.57661	4.36041	1.05799	1.78915	1.14568	1.23447	0.894263	0.585212	0.590118	0.293126	0.757705	0.624572	1.01598	1.11988	0.982132	0.629854
Solyc00g006820	172.187	Expressed	1.02328	0.378286	0.797313	0.376298	0.309341	0.673981	0.802105	0.640903	0.334776	0.624051	0.387177	0.219867	0.123051	0.294024	0.0135401	0.0634265	3.05759	0.540098	0.392003	0.203183	0.484207	0.877956	0.447016	0.613805	0.363785	0.299444	0.242466	0.124591	0.0543906	0.0986999	0.0636887	0.0319831	2.50227	2.05007	0.975948	1.03543	1.12031	0.236092	0.243631	0.630853	0.0460751	0.121278	0.0719375	0.0327872	0.0366003	0.0375	0.0375
Solyc00g006830	51.92	Expressed	6.11253	0.519278	0.933554	0.636218	2.26487	1.58821	1.65069	1.09914	2.51636	1.52673	2.70372	2.32999	2.29956	1.80306	2.23004	0.94718	6.66079	0.360855	1.04161	4.36885	2.14815	2.66137	1.8943	2.96036	0.901447	4.98747	2.06386	1.74662	1.90756	0.57336	1.15954	3.27736	7.06799	0.664964	1.91998	2.25203	1.58069	1.54229	1.16932	1.34006	0.986834	1.95603	2.0336	0.542571	1.64091	0.522452	1.53829
Solyc00g006840	0.75		0	0	0	0.025	0	0	0	0	0	0.025	0	0	0	0	0	0	0.0333333	0	0	0.025	0	0	0	0	0	0	0	0.0225	0	0	0	0	0.66	0.0585947	0	0.0375	0.0618466	0.0590727	0.0858293	0.0402854	0	0.025	0	0.0225	0.035	0	0.0475
Solyc00g006850	0		0	0	0	0	0	0	0	0	0	0	0	0	0	0	0	0	0	0	0	0	0	0	0	0	0	0	0	0	0	0	0	0	0	0	0	0	0	0	0	0	0	0	0	0	0	0	0
Solyc00g006860	0.03		0	0	0	0	0	0	0	0	0	0	0	0	0	0	0	0	0	0	0	0	0	0	0	0	0	0	0	0	0	0	0	0	0	0	0	0	0	0	0	0	0	0	0	0	0	0	0
Solyc00g006870	0		0	0	0	0	0	0	0	0	0	0	0	0	0	0	0	0	0	0	0	0	0	0	0	0	0	0	0	0	0	0	0	0	0	0	0	0	0	0	0	0	0	0	0	0	0	0	0
Solyc00g006880	0		0	0	0	0	0	0	0	0	0	0	0	0	0	0	0	0	0	0	0	0	0	0	0	0	0	0	0	0	0	0	0	0	0	0	0	0	0	0	0	0	0	0	0	0	0	0	0
Solyc00g006890	0		0	0	0	0	0	0	0	0	0	0	0	0	0	0	0	0	0	0	0	0	0	0	0	0	0	0	0	0	0	0	0	0	0	0	0	0	0	0	0	0	0	0	0	0	0	0	0
Solyc00g006900	2.31	Expressed	0	0.095	0.0712975	0.0790042	0.22845	0.157394	0.12691	0.105079	0.167755	0.259808	0.0433974	0.33962	0.151733	0.0896637	0.178949	0.182323	0	0.0377216	0.0705337	0.10499	0.198599	0.237802	0.126951	0.120623	0.32597	0.11198	0.0681909	0.0615088	0.0578072	0.0639661	0.160072	0.101201	0	0	0.0532877	0.182226	0.0673919	0.209737	0.249144	0.18071	0.119548	0.0984886	0.126647	0.123626	0.07587	0.0767029	0.159759
Solyc00g007000	1.565	Expressed	0	0.0768521	0.0225	0	0.0500625	0.0309233	0.0612883	0.03	0.0275	0	0.03	0.0452769	0.0430842	0	0.0320156	0.0309233	0	0.0517204	0.0325	0.055	0.0525	0	0.0361421	0.103642	0	0.0489898	0.0325	0	0	0	0	0.0125	0	0	0.0375	0	0.03	0.0275	0	0	0.0309233	0.055	0.0525	0.0404918	0.0325	0	0.0234521
Solyc00g007010	35.1633	Expressed	1.42367	0.979911	1.02282	0.265185	0.851091	0.564764	0.394153	0.760274	0.944612	0.81914	0.818478	1.54279	0.2222	0.455547	1.19912	0.537285	1.66422	0.648015	1.20715	0.890711	1.19318	0.490074	0.639627	0.706983	0.790406	1.12491	1.08525	1.03684	2.04272	0.441758	0.551468	1.34023	3.14386	0.738294	0.169509	1.0573	0.636822	1.19982	0.488441	0.387535	0.250566	1.28408	0.538677	1.15719	1.22058	0.455293	0.848836
Solyc00g007020	0		0	0	0	0	0	0	0	0	0	0	0	0	0	0	0	0	0	0	0	0	0	0	0	0	0	0	0	0	0	0	0	0	0	0	0	0	0	0	0	0	0	0	0	0	0	0	0
Solyc00g007030	69.535	Expressed	0	0.0217945	0.03	0.0303795	0	0	0	0	0	0	0	0	0	0	0.03	0	0	0.0843974	0.147111	0.254083	0.13567	0.0575	0	0	0	0.025	0	0	0.035	0.025	0	0.025	0	0	0.778487	1.60783	0.375042	0.0425	0.0370529	0.0372771	0.0525	0	0	0.0225	0.035	0.0620987	0.0225
Solyc00g007040	10.86	Expressed	0	0.02	0	0.0303795	0	0	0	0	0	0	0	0	0	0	0	0	0	0.0225	0.033665	0.0449768	0.0275	0	0	0	0	0	0	0	0	0	0	0	0	0	0.0885532	0.234627	0.0325	0	0.0451617	0	0	0	0	0	0	0.025	0
Solyc00g007050	0.0325		0	0	0	0	0	0	0	0	0	0	0	0	0	0	0	0	0	0	0	0	0	0	0	0	0	0	0.0325	0	0	0	0	0	0	0	0	0	0	0	0	0	0	0	0	0	0	0	0
Solyc00g007060	31.08	Expressed	1.82521	2.67869	1.1579	0.926133	0.669459	0.934425	0.425918	0.407318	0.392924	0.380797	0.638664	1.4646	0.681133	0.936655	0.756322	0.205847	0.523461	1.22239	0.734762	1.60673	0.654196	0.672378	1.1408	0.323857	0.289295	0.934929	0.529864	0.667801	0.227207	0.452824	0.565582	0.413521	2.15128	0.736274	1.09947	0.703946	0.796498	0.399445	0.341501	1.06594	0.230881	0.29139	0.413944	0.185354	0.359606	0.172578	0.284147
Solyc00g007070	164.54	Expressed	15.2362	3.89676	1.86491	2.00171	2.5802	2.00527	2.33646	2.76421	2.11486	2.21724	1.91577	3.14841	1.72189	2.39112	2.1844	2.10059	11.8922	2.42896	0.618931	6.6717	1.62634	2.81568	1.11582	2.74651	2.44772	2.82665	1.84653	1.57634	4.83409	0.409397	4.67178	8.08967	7.50025	5.25287	2.08374	1.01972	2.22163	0.885225	0.553301	1.55276	1.97795	3.0975	1.06828	1.56491	2.26218	3.51495	2.98062
Solyc00g007080	10.4267	Expressed	0.765971	0.129132	0.685821	0.504437	0.197921	0.0125831	0.228145	0.197416	0.100582	0.116574	0.113017	0.0242813	0.0698212	0.045	0.0643396	0.0339116	0.303535	0.848522	0.170367	0.126656	0.0992052	0.0762671	0.166783	0.0812788	0.035	0.0264575	0.105149	0	0.035	0.0430842	0.0332603	0.0125	0.222436	0.861858	0.260992	0.202402	0.115641	0.107577	0.0649359	0.118498	0.0334166	0.068374	0.116503	0.0409268	0.0325	0.07587	0.0561805
Solyc00g007090	30.55	Expressed	3.00568	0.66947	0.800266	0.829232	0.156545	0.697071	0.486458	0.54868	0.729536	0.516809	0.29153	0.523472	0.364426	0.550235	0.323058	0.347803	3.59311	0.769545	0.899086	0.302197	0.871439	0.790411	0.148127	0.409736	0.332299	0.185315	0.391841	0.269486	0.452732	0.86523	0.296967	0.640852	4.37075	1.57345	0.373151	0.87354	1.0719	0.583738	0.415983	0.678644	0.454661	0.396366	0.639922	0.638573	0.74779	0.603523	1.02397
Solyc00g007100	41.5325	Expressed	1.41956	1.22588	0.699671	0.553088	1.10543	0.850631	2.17376	0.900088	2.4467	0.656785	1.47841	1.1388	0.869045	1.12514	1.12558	1.11599	0.62554	0.495671	1.01689	1.50544	0.677526	1.52116	1.28636	1.76323	1.8715	1.17647	1.68129	1.39276	1.7029	0.362086	0.387565	0.430562	1.63279	0.301404	0.51874	0.234889	0.913792	0.942456	0.748849	1.29838	0.949301	0.78023	0.403348	0.41013	0.808553	0.81417	0.49479
Solyc00g007110	12.22	Expressed	0	0.521654	0.589081	0.313538	0.733138	0.547007	0.857662	0.196993	0.33604	0.886327	0.64115	0.323136	0.675358	0.429658	0.357783	0.168424	0	0.407214	0.629987	0.878962	0.355044	1.23151	0.822672	1.22468	0.630456	0.307879	0.252896	0.123381	0.468444	0.147789	0.166902	0.14857	0.09	0	0.493381	0.852783	0.772749	0.0907836	0.811966	0.387782	0.533339	0.34913	0.498922	0.343584	0.436776	0.160987	0.311699
Solyc00g007120	20.4575	Expressed	1.08004	0.493871	1.08137	0.45476	0.94447	1.07023	1.05005	0.520727	0.325128	0.860823	0.358315	0.859257	0.909157	0.517091	0.348912	0.6443	1.88478	1.74395	0.697524	2.08294	0.570794	0.952952	1.07088	0.917782	0.799964	0.642041	1.00701	0.73934	0.857024	0.525648	0.341989	0.777446	0.348393	0.0983757	1.41085	0.285055	1.75823	1.11614	0.803942	0.849142	0.540262	0.440915	0.351319	0.438919	0.600089	0.0644205	0.303518
Solyc00g007130	22.8233	Expressed	0.203415	0.0324037	0.10116	0.0580768	0.211542	0.0587367	0.11926	0.108513	0.107034	0.102347	0.165555	0.151959	0.275269	0.100115	0.178203	0.184323	0.308347	0.0132288	0.044441	0.15278	0.0712244	0.0808677	0.10586	0.0498331	0.16342	0.11905	0.137931	0.0625	0.162089	0.19211	0.150852	0.0891978	0.97335	0.355293	0.0596343	0.0821584	0.0877021	0.149018	0.0980115	0.201039	0.142185	0.11143	0.0852814	0.0846931	0.180877	0.108503	0.0896753
Solyc00g007140	0.065		0	0.04	0	0	0	0	0	0	0	0.065	0	0	0	0.035	0	0	0	0	0	0	0	0.0361421	0	0	0	0	0	0	0	0	0	0	0	0	0	0.0225	0	0	0	0	0	0	0	0	0	0	0
Solyc00g007150	17.47	Expressed	3.38717	0.652027	0.431787	0.190892	0.209026	0.149241	0.150776	0.249746	0.142595	0.344005	0.265185	0.0437798	0.0942956	0.120173	0.0973396	0.0488194	1.59385	0.309418	0.362238	0.323558	0.152643	0.169577	0.186609	0.149576	0.128671	0.169558	0.0772981	0.0334166	0.160494	0.0636396	0.0469042	0.131561	3.24585	3.58774	0.617589	0.170171	0.210515	0.0952519	0.0672062	0.0939415	0.0578072	0.101026	0.129035	0.188475	0.270382	0.249545	0.167556
Solyc00g007160	0.35		0	0.0857686	0.025	0.0409013	0.0593015	0.0539096	0.0160078	0.065	0.0466369	0.0308221	0.0332603	0.0225	0.0225	0.045	0.025	0.0474342	0	0.0956556	0.0275	0.0303795	0.00853913	0.03	0	0	0	0	0.02	0.0225	0.02	0	0	0	0	0	0.0478714	0	0	0.045	0	0.0275	0.0253311	0	0.0288675	0.0225	0.0390246	0.0225	0.0357071
Solyc00g007170	5.87333	Expressed	0.072188	0.0325	0.0288675	0.0288675	0.0517204	0.0539096	0.0325	0.0348807	0	0.0337577	0.0332603	0	0	0.0225	0.0225	0.0575	0.24835	0.0419076	0.0275	0.05	0.0225	0	0.0377492	0.03	0	0	0.02	0	0.0419076	0.0262996	0	0.0125	0.06	0.211686	0	0.0225	0	0	0	0	0.0273861	0	0	0.0225	0.0325	0.0225	0.02
Solyc00g007180	0.0766667		0	0	0	0	0	0	0	0.0325	0	0	0	0	0	0	0	0	0	0	0	0	0	0	0	0	0	0	0	0	0	0	0	0	0	0	0	0	0	0	0	0	0	0	0	0	0	0	0
Solyc00g007190	2.70333	Expressed	0.493333	0.132626	0.198683	0.166958	0.136412	0.10781	0.258727	0.162705	0.225444	0.181292	0.099781	0.162859	0.0901272	0.185534	0.179281	0.144971	0.1	0.12626	0.134992	0.0878446	0.0390246	0.170606	0.0933073	0.280576	0.0626332	0.266876	0.130855	0.00957427	0.135915	0.02136	0.184498	0.0460072	0.240647	0.967632	0.173325	0.135301	0.200182	0.0985732	0.161832	0.15955	0.16505	0.118145	0.160747	0.13772	0.0888819	0.0533073	0.0672526
Solyc00g007200	15.6567	Expressed	2.52545	0.128347	0.172693	0.0750972	0.103793	0.0413068	0.0548483	0.0491596	0.0533073	0.0600694	0.0385141	0	0	0.0225	0.0625	0	1.35081	0.157394	0.211202	0.08026	0.0768657	0.10858	0.0838028	0.0413068	0.025	0.0358236	0.0636887	0.045	0.0552834	0	0	0.0125	2.05203	0.57182	0.225776	0.0612372	0.114045	0.183167	0.185354	0.118207	0.0275	0.0275	0.0303795	0.065	0.035	0.0494975	0
Solyc00g007210	0.03		0	0	0	0	0	0	0	0	0	0	0	0	0	0	0	0	0	0	0	0	0	0	0	0	0	0	0	0	0	0	0	0	0	0	0	0	0	0	0	0	0	0	0	0	0	0	0
Solyc00g007220	197.5	Expressed	1.9101	0.090312	0.158035	0.451903	0.415579	0.811506	0.62183	0.442229	1.91901	2.75544	1.46539	1.83016	2.46443	1.05113	0.759456	0.581399	15.109	0.155456	0.150686	0.158607	0.328846	1.67117	0.687645	2.04995	3.18108	4.35347	3.96463	0.794359	1.53922	1.18909	1.71144	2.23017	0.621673	1.57082	0.87165	0.677163	1.17622	1.8054	0.816347	1.0554	0.953122	1.60314	1.87985	2.06169	1.70179	0.593526	0.748476
Solyc00g007230	0.2		0	0	0	0	0	0	0	0	0	0	0	0	0.0309233	0	0	0.0309233	0	0	0	0	0	0	0.03	0	0	0	0	0.02	0	0	0	0	0	0	0	0	0	0	0	0	0	0.0303795	0	0	0	0	0.0225
Solyc00g007240	0.03		0	0	0	0	0	0	0	0	0	0	0	0	0	0	0	0	0	0	0	0	0.0225	0	0	0	0	0	0	0	0	0	0	0	0	0	0	0	0	0	0	0	0	0	0	0	0	0	0
Solyc00g007250	0.0475		0	0	0	0	0	0	0	0	0	0	0	0	0	0	0	0	0	0	0	0	0	0	0	0	0	0	0	0	0	0	0	0	0	0	0	0	0	0	0	0	0	0.0325	0	0	0	0	0
Solyc00g007260	127.573	Expressed	17.5137	0.818846	0.601877	0.346085	0.32721	0.692993	0.337305	0.534562	0.318015	0.859577	0.301855	0.64478	1.04386	0.266501	0.227317	0.391972	9.04967	0.707382	0.557831	1.24897	0.659841	0.574041	1.03921	1.39923	0.80219	0.531515	0.609214	0.450636	0.554865	0.504354	0.555713	0.4523	11.9657	1.8859	0.870431	0.762795	0.329656	0.724688	0.345314	0.821	0.130152	0.209085	0.470673	0.311726	0.547835	0.360032	0.336018
Solyc00g007270	1269.1	Expressed	213.36	13.4447	7.31593	11.6174	7.48634	16.4185	10.3719	9.06748	7.96932	23.5595	16.4823	3.01858	7.52013	7.80232	7.53795	10.5785	88.0758	5.03798	9.56124	10.4637	13.2331	16.9744	38.3106	35.7086	38.6828	28.6476	23.021	4.93942	6.37476	0.665186	13.5974	6.64451	132.274	26.4342	6.47277	1.19237	11.5584	10.6601	2.61096	18.0127	7.18534	9.87342	7.80092	8.9094	5.92043	1.99579	5.26376
Solyc00g007290	0.05		0	0	0	0	0	0	0	0	0	0	0	0	0	0	0	0	0	0	0	0	0	0	0	0.05	0	0	0	0	0	0	0	0	0	0	0	0	0	0	0	0	0	0	0	0	0	0	0
Solyc00g007300	147.62	Expressed	0.274368	0.30769	0.188105	1.01796	1.28339	1.29452	1.35428	0.842421	2.27338	3.07616	1.77294	0.509728	1.19957	0.601117	0.922852	1.47764	1.6337	0.394153	0.747897	1.03929	0.5372	2.12864	1.02115	0.44544	2.44999	2.65379	0.675561	1.0995	2.31369	1.89527	1.06903	1.75452	3.27585	0.127192	0.823442	0.505295	0.504238	1.14719	1.28594	0.888904	11.8743	12.6148	10.6378	8.70865	4.13434	8.15438	5.32695
Solyc00g007310	0.115		0	0	0	0.0225	0	0	0	0.03	0	0	0	0.025	0	0	0	0	0	0	0	0.0275	0	0	0.035	0	0.0325	0	0	0	0	0	0.0275	0	0.03	0	0	0	0	0	0.03	0	0	0	0.0625	0	0.0275	0	0
Solyc00g007320	0.516667		0	0	0	0	0	0	0	0	0	0	0	0	0	0	0	0	0	0.0275	0	0	0	0	0	0	0	0	0	0	0	0	0	0	0	0.0833333	0.0342479	0	0	0	0	0	0	0	0	0	0	0	0
Solyc00g007330	0.1		0.04	0	0	0	0	0	0	0	0	0	0	0	0	0	0	0	0	0	0	0	0	0	0	0	0	0	0	0	0	0	0	0.025	0	0	0	0	0	0	0	0	0	0	0	0	0	0	0
Solyc00g007340	0		0	0	0	0	0	0	0	0	0	0	0	0	0	0	0	0	0	0	0	0	0	0	0	0	0	0	0	0	0	0	0	0	0	0	0	0	0	0	0	0	0	0	0	0	0	0	0
Solyc00g007350	0.5725		0	0	0	0	0	0	0	0	0	0	0	0	0	0	0	0	0	0	0	0	0	0	0	0	0	0	0	0	0	0	0	0	0	0	0.0637704	0.0332603	0.0325	0	0	0	0	0	0	0	0	0	0
Solyc00g007450	0.055		0	0	0	0	0	0	0	0	0	0	0	0	0	0	0	0	0	0	0	0	0	0	0	0	0.035	0	0	0	0	0	0	0	0	0	0.0175	0	0	0	0	0	0	0	0	0	0	0	0
Solyc00g007550	0.5225		0	0.0673919	0.068678	0	0.0411045	0.0330404	0.18775	0.0361709	0.093039	0.040078	0.116145	0.0694622	0.0519615	0.0932738	0.0489898	0.0581664	0	0.0889757	0.0319831	0.0517003	0.0466369	0.03	0.0544671	0.0390246	0.0990265	0.0430842	0.0675	0.0288675	0.07	0.0575	0	0.0894777	0	0.0366667	0.0457347	0.10781	0.0600694	0.0474342	0.0464354	0.0319831	0.0411045	0.0278014	0.0668954	0.064727	0.035	0.0272336	0.0542371
Solyc00g007560	3.5125	Expressed	0	0	0	0	0	0	0	0	0	0	0	0	0	0	0	0	0	0	0	0.0545245	0.0275	0	0	0	0	0	0	0	0	0	0	0	0	0	0.0960469	0.0754293	0	0	0	0.0275	0	0	0.03	0	0.035	0.0175	0
Solyc00g007570	0.025		0	0	0	0	0	0	0	0	0	0	0	0	0	0	0	0	0	0	0	0	0	0	0	0	0	0	0	0	0	0	0	0	0	0	0	0	0	0	0	0	0	0	0	0	0	0	0
Solyc00g007580	0.0525		0	0	0	0	0	0	0	0	0	0	0	0	0	0	0	0	0	0	0	0	0	0	0	0	0	0	0	0	0	0	0	0	0	0	0.025	0	0	0	0	0	0	0	0	0	0	0	0
Solyc00g007590	0.0333333		0	0	0	0	0	0	0	0	0	0	0	0	0	0	0	0	0	0	0	0	0	0	0	0	0	0	0	0	0	0	0	0	0	0	0	0	0	0	0	0	0	0	0	0	0	0	0
Solyc00g007600	0.3		0	0.0225	0.025	0.0775	0.0597739	0.121861	0.0318852	0.0738664	0.101571	0.0642099	0.117047	0.0655744	0.0825126	0.0275	0.0309233	0	0	0.0225	0	0.0303795	0.0500625	0.0361421	0.0618466	0.0780491	0.0390246	0.0264575	0.0319831	0.0430842	0	0.0826009	0	0.0125	0	0	0.0478714	0.0442295	0	0.0426956	0.045	0	0	0	0.025	0.0225	0.0325	0	0
Solyc00g007610	0		0	0	0	0	0	0	0	0	0	0	0	0	0	0	0	0	0	0	0	0	0	0	0	0	0	0	0	0	0	0	0	0	0	0	0	0	0	0	0	0	0	0	0	0	0	0	0
Solyc00g007910	0.035		0	0	0	0	0	0	0	0	0	0	0	0	0	0	0	0	0	0	0	0	0	0	0	0	0	0	0	0	0	0	0	0	0	0	0	0	0	0	0	0	0	0	0	0	0	0	0
Solyc00g007920	0.0675		0	0	0	0	0	0	0	0	0	0	0	0	0	0	0	0	0	0	0	0	0	0	0	0	0	0	0	0	0	0	0	0	0	0	0	0	0	0	0	0	0	0	0	0	0	0	0
Solyc00g007930	0.11		0	0	0	0	0	0	0	0	0	0	0	0	0	0	0	0	0	0	0	0	0	0	0	0	0	0	0	0	0	0	0	0	0	0	0	0	0	0	0	0	0	0	0	0	0	0	0
Solyc00g007940	0.045		0	0	0	0	0	0	0	0	0	0	0	0	0	0	0	0	0	0	0	0	0	0	0	0	0	0	0	0	0	0	0	0	0	0	0	0	0	0	0	0	0	0	0	0	0	0	0
Solyc00g007950	0.035		0	0	0	0	0	0	0	0	0	0	0	0	0	0	0	0	0	0	0	0	0	0	0	0	0	0	0	0	0	0	0	0	0	0	0	0	0	0	0	0	0	0	0	0	0.035	0	0
Solyc00g007960	0.045		0	0	0	0	0	0	0	0	0	0	0	0	0	0	0	0	0	0	0	0	0	0	0	0	0	0	0	0	0	0	0	0	0	0	0	0	0	0	0	0	0	0	0	0	0	0	0
Solyc00g007970	0.09		0	0	0	0	0	0	0	0	0	0	0	0	0	0	0	0	0	0	0	0	0	0	0	0	0	0	0	0	0	0	0	0	0	0	0	0	0	0	0	0	0	0	0	0	0	0	0
Solyc00g007980	0.0675		0	0	0	0	0	0	0	0	0	0	0	0	0	0	0	0	0	0	0	0	0	0	0	0	0	0	0	0	0	0	0	0	0	0	0	0	0	0	0	0	0	0	0.03	0	0	0	0
Solyc00g007990	0.03		0	0	0	0	0	0	0	0	0	0	0	0	0	0	0	0	0.03	0	0	0	0	0	0	0	0	0	0	0	0	0	0	0	0	0	0	0	0	0	0	0	0	0	0.025	0	0	0	0
Solyc00g008000	0.155		0	0	0	0	0	0	0	0	0	0	0	0	0	0	0	0	0	0	0	0	0	0	0	0	0	0	0.02	0	0	0	0	0	0	0	0	0	0	0	0	0	0	0	0.025	0	0	0	0
Solyc00g008010	0.0225		0	0	0	0	0	0	0	0	0	0	0	0	0	0	0	0	0	0	0	0	0	0	0	0	0	0	0	0	0	0	0	0	0	0	0	0	0	0	0	0	0	0	0	0	0	0	0
Solyc00g008020	0.0325		0	0	0	0	0	0	0	0	0	0	0	0	0	0	0	0	0	0	0	0	0	0	0	0	0	0	0	0	0	0	0	0	0	0	0	0	0	0	0	0	0	0	0	0	0	0	0
Solyc00g008030	0.0333333		0	0	0	0	0	0	0	0	0	0	0	0	0	0	0	0	0	0	0	0	0	0	0	0	0	0	0	0	0	0	0	0	0	0	0	0	0	0	0	0	0	0	0	0	0	0	0
Solyc00g008040	0.0275		0	0	0	0	0	0	0	0	0	0	0	0	0	0	0	0	0	0	0	0	0	0	0	0	0	0	0	0	0	0	0	0	0	0	0	0	0	0	0	0	0	0	0	0	0	0	0
Solyc00g008050	0		0	0	0	0	0	0	0	0	0	0	0	0	0	0	0	0	0	0	0	0	0	0	0	0	0	0	0	0	0	0	0	0	0	0	0	0	0	0	0	0	0	0	0	0	0	0	0
Solyc00g008060	0.0275		0	0	0	0	0	0	0	0	0	0	0	0	0	0	0	0	0	0	0	0	0	0	0	0	0	0	0	0	0	0	0	0	0	0	0	0	0	0	0	0	0	0	0	0	0	0	0
Solyc00g008070	0.09		0	0	0	0	0	0	0	0	0	0	0	0	0	0	0	0	0	0	0	0	0	0	0	0	0	0	0	0	0	0	0	0	0	0	0	0	0	0	0	0	0	0	0	0	0	0	0
Solyc00g008080	0.025		0	0	0	0	0	0	0	0	0	0	0	0	0	0	0	0	0	0	0	0	0	0	0	0	0	0	0	0	0	0	0	0	0	0	0	0	0	0	0	0	0	0	0	0	0	0	0
Solyc00g008090	0.0225		0	0	0	0	0	0	0	0	0	0	0	0	0	0	0	0	0	0	0	0	0	0	0	0	0	0	0	0	0	0	0	0	0	0	0	0	0	0	0	0	0	0	0	0	0	0	0
Solyc00g008100	0.035		0	0	0	0	0	0	0	0	0	0	0	0	0	0	0	0	0	0	0	0	0	0	0	0	0	0	0	0	0	0	0	0	0	0	0	0	0	0	0	0	0	0	0.025	0	0.035	0	0
Solyc00g008110	0.0725		0	0	0	0	0	0	0	0	0	0	0	0	0	0	0	0	0	0	0	0	0	0	0	0	0	0	0	0	0	0	0	0	0	0	0	0	0	0	0	0	0	0	0.025	0	0	0	0
Solyc00g008120	0.155		0	0	0	0	0	0	0	0	0	0	0	0	0	0	0	0	0	0	0	0	0	0	0	0	0	0	0	0	0	0	0	0	0	0	0	0	0	0	0	0	0	0	0.03	0	0	0	0
Solyc00g008130	0.09		0	0	0	0	0	0	0	0	0	0	0	0	0	0	0	0	0	0	0	0	0	0	0	0	0	0	0	0	0	0	0	0	0	0	0	0	0	0	0	0	0	0	0	0	0	0	0
Solyc00g008140	0.035		0	0	0	0	0	0	0	0	0	0	0	0	0	0	0	0	0	0	0	0	0	0	0	0	0	0	0	0	0	0	0	0	0	0	0	0	0	0	0	0	0	0	0	0	0.035	0	0
Solyc00g008150	0.065		0	0	0	0	0	0	0	0	0	0	0	0	0	0	0	0	0	0	0	0	0	0	0	0	0	0	0	0	0	0	0	0	0	0	0	0	0	0	0	0	0	0	0	0	0	0	0
Solyc00g008160	0.045		0	0	0	0	0	0	0	0	0	0	0	0	0	0	0	0	0	0	0	0	0	0	0	0	0	0	0	0	0	0	0	0	0	0	0	0	0	0	0	0	0	0	0	0	0	0	0
Solyc00g008260	0.03		0	0	0	0	0	0	0	0	0	0	0	0	0	0	0	0	0	0	0	0	0	0	0	0	0	0	0	0	0	0	0	0	0	0	0	0	0	0	0	0	0	0	0.03	0	0	0	0
Solyc00g008270	0.025		0	0	0	0	0	0	0	0	0	0	0	0	0	0	0	0	0	0	0	0	0	0	0	0	0	0	0	0	0	0	0	0	0	0	0	0	0	0	0	0	0	0	0	0	0	0	0
Solyc00g008570	2.135	Expressed	0	0.0566238	0.03	0.0442295	0.0325	0.03	0.0225	0	0	0.025	0	0.0259808	0.0275	0.0332603	0.03	0.03	0	0.0681145	0	0	0	0.03	0.00645497	0	0	0	0	0	0	0.02	0	0	0	0.0433333	0.094989	0.09	0.0600694	0.0246221	0	0	0.0475	0.025	0.0278014	0	0	0.0275	0.0262996
Solyc00g008580	0		0	0	0	0	0	0	0	0	0	0	0	0	0	0	0	0	0	0	0	0	0	0	0	0	0	0	0	0	0	0	0	0	0	0	0	0	0	0	0	0	0	0	0	0	0	0	0
Solyc00g008680	173.24	Expressed	13.1617	5.75037	5.54997	2.1705	4.75151	4.84852	3.08982	2.71244	1.58507	5.04186	5.57755	3.53131	7.9373	7.0637	3.5027	2.61632	9.6318	6.34155	5.54895	7.81428	1.68452	2.48296	3.62382	4.9027	6.03509	6.21388	2.19938	2.87381	5.27919	2.18709	3.46846	8.10864	8.44471	2.94576	2.694	5.67232	4.76592	3.10928	2.77275	2.39774	5.29916	2.7113	1.329	3.89289	4.56379	2.01075	3.17517
Solyc00g008690	0.035		0	0	0	0	0	0	0	0	0	0	0	0	0	0.035	0	0	0	0	0	0	0	0	0	0	0	0	0	0	0	0	0	0	0	0	0	0	0	0	0	0	0	0	0	0	0	0	0
Solyc00g008800	0.035		0	0	0	0	0	0	0	0	0	0	0	0	0	0	0	0	0	0	0	0	0	0	0	0	0	0	0	0	0	0	0	0	0	0	0	0	0	0	0	0	0	0	0	0	0	0	0
Solyc00g008900	0.09		0	0	0	0	0	0	0	0	0	0	0	0	0	0	0	0	0	0	0	0	0	0	0	0	0	0	0	0	0	0	0	0	0	0	0	0	0	0	0	0	0	0	0.025	0	0	0	0
Solyc00g008910	0.0725		0	0	0	0	0	0	0	0	0	0	0	0	0	0	0	0	0	0	0	0	0	0	0	0	0	0	0	0	0	0	0	0	0	0	0	0	0	0	0	0	0	0	0	0	0.035	0	0
Solyc00g008920	0		0	0	0	0	0	0	0	0	0	0	0	0	0	0	0	0	0	0	0	0	0	0	0	0	0	0	0	0	0	0	0	0	0	0	0	0	0	0	0	0	0	0	0	0	0	0	0
Solyc00g009020	357.915	Expressed	9.23386	7.47059	12.697	5.2581	11.2404	2.23029	5.08639	3.33221	6.93109	3.60756	6.05937	3.57421	6.79158	2.81943	6.56384	3.72046	14.2807	8.59689	6.46094	9.51661	4.14801	4.25361	3.93411	4.15484	1.89124	2.69046	5.67876	3.76562	1.4294	3.57893	3.19497	5.29409	37.863	19.1267	5.71274	2.76946	4.96515	1.80106	4.65611	3.36413	4.29848	4.84356	4.35431	2.02366	2.45656	3.82808	2.68191
Solyc00g009030	5.75	Expressed	0.461447	0.0561805	0.0686021	0	0.0303795	0.045	0.0225	0	0	0	0.0291548	0.0234521	0.045	0	0.03	0	0.492657	0.116503	0.0325	0.0275	0	0	0.035	0	0	0.015	0.035	0.0225	0.02	0	0	0.0239357	1.89906	0.693213	0.0707107	0.0275	0	0	0.03	0	0	0	0	0.0225	0.00707107	0.025	0.02
Solyc00g009040	94.49	Expressed	1.22646	0.0877852	0.0826136	0.065622	0.0477842	0.03	0.0487126	0.0552834	0.0275	0.0337577	0.0332603	0.025	0.03	0	0	0.0425	0.031798	0.435457	0.24878	0.512843	0.257435	0.192224	0.0967277	0.0377492	0.0337577	0.064727	0.0526585	0.02	0.0340343	0.03	0.03	0.0125	4.8614	1.18305	0.667839	0.978786	0.334539	0.09268	0.111729	0.129261	0.0667083	0.131846	0.0517204	0.0366288	0.17	0.0451848	0.0361421
Solyc00g009050	9.005	Expressed	0.409281	0.445353	0.289666	0.134312	0.10924	0.0897566	0.160539	0.127345	0.114928	0.108858	0.161832	0.07	0.03	0.0314576	0.0225	0.0566238	0.670622	0.256271	0.419225	0.291962	0.0642099	0.107121	0.0748749	0.0805709	0.0634265	0.0495606	0.0684805	0.0924662	0.02	0	0.0275	0.0760482	0	0.839133	0.265031	0.205117	0.0927362	0.0645497	0.0977561	0.105712	0	0.0806742	0.0683587	0.0225	0.0348807	0.0225	0.0234521
Solyc00g009060	36.8975	Expressed	2.39984	0.943901	1.658	1.19799	1.20909	0.721468	0.89658	0.541503	1.14874	0.591895	1.47581	1.26272	2.07771	0.801222	1.11782	0.968852	0.981139	1.3623	2.35906	0.487295	0.994563	2.20433	1.03241	3.50451	1.76451	2.43398	1.9325	0.824736	1.55001	1.75046	4.26678	2.53295	1.17513	0.405257	1.59409	1.37776	0.498404	0.702334	1.45545	0.818427	1.00709	1.03609	0.923711	0.729303	1.35315	0.79679	1.26331
Solyc00g009070	2.385	Expressed	0.0976957	0.0225	0	0	0	0.03	0	0	0.0317543	0.121475	0.0779423	0	0.0675	0.0618466	0.0721688	0.0995825	0.110955	0	0.0275	0.0542179	0	0	0.090967	0	0	0	0	0	0.0325	0.025	0	0	0.149926	0.221008	0	0.0940744	0	0.0262996	0.0275	0.0325	0	0.0475	0.025	0.0540062	0.0954812	0.0175	0
Solyc00g009080	63.425	Expressed	5.6998	2.4435	3.05832	1.21359	0.694598	0.815996	0.657437	1.25788	0.412682	0.455503	0.889844	0.938761	0.609125	0.522582	1.32026	1.05852	1.15768	1.79135	1.66475	0.771978	0.614375	0.516033	0.963756	0.916265	1.51351	0.323583	1.25723	0.855759	0.339666	0.310725	0.898261	1.16544	0.690998	1.70888	1.63752	0.858869	0.655177	0.342734	0.843855	1.82297	0.54434	0.302583	0.55303	0.628185	0.506909	0.883228	0.374931
Solyc00g009090	11.8967	Expressed	1.99667	0.0272336	0	0.0275	0.0375278	0	0	0	0	0	0	0	0	0	0	0	9.75302	0.0272336	0	0.0756086	0.0755397	0.0575	0	0	0	0	0.035	0.0225	0	0	0	0	0.264596	0	0.0838153	0.270463	0.219184	0.0262996	0.0303795	0.04	0	0	0	0	0	0.0275	0
Solyc00g009100	27.5325	Expressed	0.607536	0.925612	0.606939	0.68778	1.27798	0.880237	1.58183	0.643135	1.1479	0.53713	1.87078	1.29477	1.2678	0.59479	0.866381	1.19907	0.546392	1.63424	0.859548	1.14192	0.736211	0.907588	1.07735	0.709542	0.667314	0.114045	0.915574	0.576729	0.403237	0.781612	0.351675	1.45141	0.532458	0.175594	0.667489	1.05474	1.14027	0.84049	0.639648	0.181705	0.468337	0.373385	0.240221	0.26622	1.3169	0.397555	0.346443
Solyc00g009110	38.8833	Expressed	6.50667	0.953681	0.7655	1.61216	1.8453	1.32258	2.21417	0.815685	0.981906	1.27009	1.1615	4.68108	2.91122	1.49809	0.217462	0.4495	4.55989	0.672029	0.25939	0.381018	0.845373	0.650248	0.985346	0.848621	0.965638	0.802074	0.392564	2.60251	1.76033	1.28538	0.155958	0.468888	7.40507	1.64469	0.562857	0.645799	0.78381	0.377897	0.620865	0.623418	0.300482	0.178955	0.127443	0.144366	0.466215	0.0801431	0.388652
Solyc00g009120	31.39	Expressed	1.19763	0.481361	0.417181	0.311903	0.315977	0.199604	0.157321	0.300804	0.27553	0.295818	0.2237	0.17022	0.62715	0.682215	0.240139	0.602334	2.51867	0.271335	0.16013	0.075111	0.200458	0.0710047	0.0347311	0.111692	0.120442	0.0775	0.210372	0.250844	0.371963	0.238625	0.280847	0.528212	0.941435	0.416026	0.101899	0.103471	0.0532291	0.0671441	0.0983616	0.132947	0.0769199	0.0893495	0.0878446	0.0891043	0.152589	0.194529	0.25164
Solyc00g009130	58.96	Expressed	0.163333	0.32778	0.336266	0.276085	0.218913	0.618633	0.371761	0.239004	0.467821	0.400364	0.303023	0.73315	1.73929	1.20893	1.12498	1.56058	0.057735	0.639484	0.21704	0.209861	0.164671	0.176653	0.140557	0.168251	0.0893845	0.0726865	0.238899	0.410982	0.49343	0.381783	1.18876	0.911277	0.11348	0.360201	0.14975	0.0968138	0.115136	0.0777282	0.122236	0.205036	0.132571	0.154022	0.236044	0.43872	0.124197	0.463706	0.659002
Solyc00g009140	208.853	Expressed	3.49695	1.27417	0.651516	0.356613	0.817082	0.486679	0.216891	0.44156	0.896549	0.420139	0.469208	0.800483	2.58543	2.07786	1.23618	3.82704	1.65265	0.378624	0.611983	0.135308	0.19598	0.252091	0.0800521	0.270817	0.0986577	0.211005	0.374455	0.882226	0.839375	0.73241	1.4035	1.53302	1.57931	3.17095	0.217121	0.307987	0.13016	0.109772	0.21716	0.189209	0.150028	0.245645	0.295138	0.529473	0.159661	0.742242	1.12851
Solyc00g009240	0.035		0	0	0	0	0	0	0	0	0	0	0	0	0	0	0	0	0	0	0	0	0	0	0	0	0	0	0	0	0	0	0	0	0	0	0	0	0	0	0	0	0	0	0	0	0	0	0
Solyc00g009440	2.72	Expressed	0	0	0	0.0225	0	0	0	0.0325	0.0225	0.0325	0.0291548	0.045	0.0275	0	0.03	0	0	0	0	0.0275	0	0	0.0348807	0.0575	0.05	0.025	0	0.0225	0.0325	0	0.0225	0.0396863	0	0	0	0	0	0	0	0	0	0.0320156	0	0.0425	0.0366003	0.0303795	0
Solyc00g009540	0.025		0	0	0	0	0	0	0	0	0	0	0	0	0	0	0	0	0	0	0	0	0	0	0	0	0	0	0	0	0	0	0	0	0	0	0	0	0	0	0	0	0	0	0	0	0	0	0
Solyc00g009650	0.0675		0	0	0	0	0	0	0	0	0	0	0	0	0	0	0	0	0	0	0	0	0	0	0	0	0	0	0	0	0	0	0	0	0	0	0	0	0	0	0	0	0	0	0	0	0	0	0
Solyc00g009660	0.085		0	0	0	0	0	0	0	0	0	0	0	0	0	0	0	0	0	0	0	0	0	0	0	0	0	0	0	0	0	0	0	0	0	0	0	0	0	0	0	0	0	0	0	0	0	0	0
Solyc00g009760	0.123333		0	0	0	0	0	0	0	0	0	0	0	0	0	0	0	0	0	0	0	0	0	0	0	0	0	0	0	0	0	0	0	0	0	0	0	0	0	0	0	0	0	0	0	0	0	0	0
Solyc00g009770	0.9775		0	0.0225	0.0225	0.0225	0.0325	0	0	0	0	0	0	0	0	0	0	0	0	0.02	0	0	0	0	0	0	0	0	0.05	0	0	0	0	0	0	0	0	0	0	0	0	0.0275	0	0	0.0332603	0	0.119548	0.025	0
Solyc00g009780	0.04		0	0	0	0	0	0	0	0	0	0	0	0	0	0	0	0	0	0	0	0	0	0	0	0	0	0	0	0	0	0	0	0	0	0	0	0	0	0	0	0	0	0	0	0.0225	0	0	0
Solyc00g009790	0.1825		0	0.02	0.025	0.0478714	0.0625	0	0.0475	0.03	0	0	0.113578	0	0	0	0.03	0.03	0	0.0280995	0	0.025	0.0337577	0	0	0	0	0	0	0	0	0	0	0	0	0	0.025	0	0	0	0	0	0	0.0275	0	0	0	0	0
Solyc00g009800	0.0425		0	0	0	0	0	0	0	0	0	0	0	0	0	0	0	0	0	0	0	0	0	0	0	0	0	0	0	0	0	0	0	0	0	0	0	0	0	0	0	0	0	0.025	0	0	0	0	0
Solyc00g010100	0.025		0	0	0	0	0	0	0	0	0	0	0	0	0	0	0	0	0	0	0	0	0	0	0	0	0	0	0	0	0	0	0	0	0	0	0	0	0	0	0	0	0	0	0	0	0	0	0
Solyc00g010110	0.03		0	0	0	0	0	0	0	0	0	0	0	0	0	0	0	0	0	0	0	0	0	0	0	0	0	0	0	0	0	0	0	0	0	0	0	0	0	0	0	0	0	0	0	0	0	0	0
Solyc00g010210	0.0225		0	0	0	0	0	0	0	0	0	0	0	0	0	0	0	0	0	0	0	0	0	0	0	0	0	0	0	0	0	0	0	0	0	0	0	0	0	0	0	0	0	0	0	0	0	0	0
Solyc00g010410	0.055		0	0	0	0	0	0	0	0	0	0	0	0	0	0	0	0	0	0	0	0	0	0	0	0	0	0	0	0	0	0	0	0	0	0	0	0	0	0	0	0	0	0	0.0320156	0	0	0	0
Solyc00g010420	0.0325		0	0	0	0	0	0	0	0	0	0	0	0	0	0	0	0	0	0	0	0	0	0	0	0	0	0	0	0	0	0	0	0	0	0	0	0	0	0	0	0	0	0	0	0	0	0	0
Solyc00g010520	0.0325		0	0	0	0	0	0	0	0	0	0	0	0	0	0	0	0	0	0	0	0	0	0	0	0	0	0	0	0	0	0	0	0	0	0	0	0	0	0	0	0	0	0	0	0	0	0	0
Solyc00g010530	0		0	0	0	0	0	0	0	0	0	0	0	0	0	0	0	0	0	0	0	0	0	0	0	0	0	0	0	0	0	0	0	0	0	0	0	0	0	0	0	0	0	0	0	0	0	0	0
Solyc00g010540	0.2875		0	0	0	0	0	0.0225	0	0.03	0.0317543	0	0	0.0225	0.0375	0.035	0	0	0	0.0275	0	0.0275	0.0275	0	0	0.025	0	0	0	0.02	0.0384057	0	0.0225	0.0125	0	0	0	0	0	0	0.0433013	0	0.0225	0.025	0.0332603	0.0327872	0.0555278	0.0175	0.031225
Solyc00g010550	1.5025	Expressed	0	0.045	0.0225	0.025	0	0.03	0	0.03	0.0291548	0.025	0	0	0.0275	0.03	0	0	0	0.0494975	0	0	0.0225	0	0	0	0	0	0	0	0.0325	0	0	0	0.03	0.0433333	0.145831	0.0583095	0	0.02	0.0275	0.02	0	0.0475	0	0	0.035	0	0.0175
Solyc00g010750	0.3725		0	0	0.0225	0.0483692	0	0	0.0670199	0.0433013	0.0769199	0.0325	0.03	0.0347311	0.0309233	0.0766485	0.0589491	0.0358236	0	0.02	0	0	0.043589	0.0325	0.0919579	0	0	0.0244949	0	0	0	0.02	0.0225	0.0306866	0	0	0.0471478	0.0510718	0.0375278	0.02	0.0754983	0	0.03	0.0256174	0.025	0.0409268	0.0275	0.0339116	0.0246221
Solyc00g010760	0.0775		0	0	0	0	0	0	0	0	0	0	0.03	0	0	0	0	0	0	0	0	0	0	0	0	0	0	0	0	0	0	0	0	0	0	0	0	0	0	0	0	0	0	0	0	0	0	0	0
Solyc00g010770	0.1625		0	0.0327872	0	0.0275	0.0725	0	0	0.0275	0.0275	0	0	0.025	0.0225	0	0.0225	0	0	0	0	0.0545245	0	0	0.0325	0.035	0	0	0	0	0	0	0	0	0	0	0	0	0	0	0.0225	0	0.03	0	0	0.0225	0	0	0
Solyc00g010780	3.5925	Expressed	0.194279	0.0917424	0.0643558	0.178092	0.290241	0.131933	0.0839146	0.344659	0.182546	0.216814	0.163936	0.117863	0.0424264	0.0570088	0.0320156	0.0762124	0.366924	0.122031	0.122304	0.616354	0.153697	0.203572	0.238271	0.140971	0.0889288	0.212877	0.0873689	0.0246221	0	0.05	0	0.0225	0.246329	0.0351188	0.0349702	0.221524	0.138834	0.108397	0.0490535	0.123786	0.05	0	0.0593015	0.0325	0	0	0.0175
Solyc00g010790	0.0333333		0	0	0	0	0	0	0	0	0	0	0	0	0	0	0	0	0	0	0	0	0	0	0	0	0	0	0	0	0	0	0	0	0	0	0	0	0	0	0	0	0	0	0.025	0	0	0	0
Solyc00g010810	0		0	0	0	0	0	0	0	0	0	0	0	0	0	0	0	0	0	0	0	0	0	0	0	0	0	0	0	0	0	0	0	0	0	0	0	0	0	0	0	0	0	0	0	0	0	0	0
Solyc00g010930	0.025		0	0	0	0	0	0	0	0	0	0	0	0	0	0	0	0	0	0	0	0	0	0	0	0	0	0	0	0	0	0	0	0	0	0	0	0	0	0	0	0	0	0	0.025	0	0	0	0
Solyc00g011130	0		0	0	0	0	0	0	0	0	0	0	0	0	0	0	0	0	0	0	0	0	0	0	0	0	0	0	0	0	0	0	0	0	0	0	0	0	0	0	0	0	0	0	0	0	0	0	0
Solyc00g011140	0		0	0	0	0	0	0	0	0	0	0	0	0	0	0	0	0	0	0	0	0	0	0	0	0	0	0	0	0	0	0	0	0	0	0	0	0	0	0	0	0	0	0	0	0	0	0	0
Solyc00g011150	0		0	0	0	0	0	0	0	0	0	0	0	0	0	0	0	0	0	0	0	0	0	0	0	0	0	0	0	0	0	0	0	0	0	0	0	0	0	0	0	0	0	0	0	0	0	0	0
Solyc00g011160	0.6375		0	0.0225	0	0	0.0275	0	0	0	0	0	0	0	0	0	0	0	0	0	0	0	0	0	0	0	0	0	0	0	0	0	0	0	0	0	0	0.0275	0	0	0	0	0	0	0	0	0.0275	0	0
Solyc00g011170	0.143333		0	0	0	0	0	0	0	0	0	0	0	0	0	0	0	0	0	0	0	0	0	0	0	0	0	0	0	0	0	0	0	0	0	0	0	0	0	0	0	0	0	0	0	0	0	0	0
Solyc00g011180	0.0175		0	0	0	0	0	0	0	0	0	0	0	0	0	0	0	0	0	0	0	0	0	0	0	0	0	0	0	0	0	0	0	0	0	0	0	0	0	0	0	0	0	0	0	0	0	0	0
Solyc00g011310	1.3225	Expressed	0	0	0	0	0	0	0	0	0	0	0	0	0	0.0275	0	0	0	0	0	0	0	0	0	0	0	0	0	0	0	0	0	0	0	0	0.025	0.0291548	0	0	0	0.0291548	0	0	0.03	0	0	0.0175	0
Solyc00g011550	18.535	Expressed	0	0	0.0510514	0	0.0325	0	0	0	0.0275	0	0	0	0	0	0	0	0	0.0440643	0.161626	0	0	0	0	0	0	0	0	0.045	0	0.025	0	0	0	0	0.350651	0.0225	0	0	0	0	0	0	0	0	0	0	0
Solyc00g011560	0.705		0	0	0	0	0	0	0	0	0	0	0	0	0	0	0	0.0275	0	0.02	0.0325	0	0.0225	0	0	0.03	0	0	0.02	0	0	0	0	0	0	0	0.0335099	0.0817007	0.0325	0	0	0.0275	0	0	0	0	0	0	0
Solyc00g011660	20.2375	Expressed	0	0	0.0433013	0	0	0	0	0	0	0	0	0	0	0	0	0	0	0.0525	0.202788	0	0	0	0	0	0	0	0	0	0	0	0	0	0	0	0.37111	0.0442295	0	0	0	0	0	0	0	0	0	0	0
Solyc00g011670	0		0	0	0	0	0	0	0	0	0	0	0	0	0	0	0	0	0	0	0	0	0	0	0	0	0	0	0	0	0	0	0	0	0	0	0	0	0	0	0	0	0	0	0	0	0	0	0
Solyc00g011870	0.765		0.27	0	0	0	0	0	0	0	0	0	0	0	0	0	0	0	0	0	0	0	0	0	0	0	0	0	0	0	0	0	0	0	0	0	0.025	0.0275	0.03	0	0	0	0	0	0	0	0.0275	0.0275	0
Solyc00g011880	35.35	Expressed	4.75886	0.896497	0.769149	0.569889	0.946938	0.658842	0.355701	0.801471	0.691573	0.413045	0.359731	0.676221	0.526537	0.464244	0.545138	0.638279	6.19775	0.25931	0.475561	1.22318	0.506672	0.498571	0.611467	0.520425	0.668406	0.800108	0.451061	0.352668	0.971772	0.599389	0.533844	0.713844	18.0745	2.77995	0.448579	0.592023	0.45586	1.06998	0.533214	0.422204	0.212382	0.666963	0.365248	0.490179	0.51372	0.689255	1.07637
Solyc00g011890	305.66	Expressed	5.68458	2.57979	2.23232	2.15465	3.39262	4.06165	2.71088	2.05982	10.2051	8.74417	12.3192	7.44606	2.54191	7.75558	9.28755	7.75848	5.93973	4.23972	1.26857	4.45989	3.28409	2.19227	6.71018	3.01172	17.0192	19.8041	19.7168	1.65444	7.28857	5.20371	9.21459	15.8324	7.99289	1.41801	3.34707	4.09598	9.48117	6.18476	3.10144	6.60451	5.42181	8.74547	10.464	7.4657	0.489989	2.93847	1.79518
Solyc00g012090	0		0	0	0	0	0	0	0	0	0	0	0	0	0	0	0	0	0	0	0	0	0	0	0	0	0	0	0	0	0	0	0	0	0	0	0	0	0	0	0	0	0	0	0	0	0	0	0
Solyc00g012310	0.035		0	0	0	0	0	0	0.035	0	0	0	0	0	0	0	0	0	0	0	0	0	0	0	0	0	0	0	0	0	0	0	0	0	0	0	0	0	0	0	0	0	0	0	0	0	0	0	0
Solyc00g012430	0		0	0	0	0	0	0	0	0	0	0	0	0	0	0	0	0	0	0	0	0	0	0	0	0	0	0	0	0	0	0	0	0	0	0	0	0	0	0	0	0	0	0	0	0	0	0	0
Solyc00g012440	0.275		0	0	0	0	0	0	0	0	0	0	0	0	0	0	0	0	0	0	0	0	0	0	0	0	0	0	0	0	0	0	0	0	0	0	0	0	0	0	0	0	0	0	0	0	0	0	0
Solyc00g012540	0.4925		0	0	0	0	0	0	0	0	0	0	0	0	0	0	0	0	0	0	0	0.025	0	0	0	0	0	0	0	0	0	0	0	0	0	0	0.0366003	0.0332603	0	0	0	0	0	0	0	0	0	0	0
Solyc00g012640	0.0333333		0	0	0	0	0	0	0	0	0	0	0	0	0	0	0	0	0	0	0	0	0	0	0	0	0	0	0	0	0	0	0	0	0	0	0	0	0	0	0	0	0	0	0	0	0	0	0
Solyc00g012650	0		0	0	0	0	0	0	0	0	0	0	0	0	0	0	0	0	0	0	0	0	0	0	0	0	0	0	0	0	0	0	0	0	0	0	0	0	0	0	0	0	0	0	0	0	0	0	0
Solyc00g012660	0		0	0	0	0	0	0	0	0	0	0	0	0	0	0	0	0	0	0	0	0	0	0	0	0	0	0	0	0	0	0	0	0	0	0	0	0	0	0	0	0	0	0	0	0	0	0	0
Solyc00g012670	0		0	0	0	0	0	0	0	0	0	0	0	0	0	0	0	0	0	0	0	0	0	0	0	0	0	0	0	0	0	0	0	0	0	0	0	0	0	0	0	0	0	0	0	0	0	0	0
Solyc00g012680	0		0	0	0	0	0	0	0	0	0	0	0	0	0	0	0	0	0	0	0	0	0	0	0	0	0	0	0	0	0	0	0	0	0	0	0	0	0	0	0	0	0	0	0	0	0	0	0
Solyc00g012690	0		0	0	0	0	0	0	0	0	0	0	0	0	0	0	0	0	0	0	0	0	0	0	0	0	0	0	0	0	0	0	0	0	0	0	0	0	0	0	0	0	0	0	0	0	0	0	0
Solyc00g012700	0		0	0	0	0	0	0	0	0	0	0	0	0	0	0	0	0	0	0	0	0	0	0	0	0	0	0	0	0	0	0	0	0	0	0	0	0	0	0	0	0	0	0	0	0	0	0	0
Solyc00g012800	0.1075		0	0	0	0	0	0	0	0	0	0	0	0	0	0	0	0	0	0	0	0	0	0	0	0	0	0	0	0	0	0	0	0	0	0	0	0	0	0	0	0	0	0	0	0	0	0	0
Solyc00g012900	0.0675		0	0	0	0	0	0	0	0	0	0	0	0	0	0	0	0	0	0	0	0	0	0	0	0	0	0	0	0	0	0	0	0	0	0	0	0	0	0	0	0	0	0	0	0	0	0	0
Solyc00g013000	0.0575		0	0	0.0575	0	0	0	0	0	0	0	0	0	0	0	0	0	0	0.02	0	0	0	0	0	0	0	0	0	0	0	0	0	0	0	0	0	0.0275	0	0	0	0	0	0	0	0	0	0	0
Solyc00g013100	0.675		0	0.02	0	0	0	0	0	0	0	0	0	0	0	0	0	0.0275	0	0.02	0	0.025	0	0	0	0.03	0	0.0525	0	0	0	0	0	0	0.03	0	0	0.0275	0	0	0.05	0	0	0	0.0525	0.0225	0.035	0	0.02
Solyc00g013110	0.4925		0	0	0	0	0	0	0	0	0	0	0	0.0225	0	0	0.03	0	0	0.0423035	0	0.0483692	0	0	0	0	0	0	0	0.02	0	0	0	0	0	0	0	0	0	0	0	0	0	0.0325	0.025	0	0	0	0.0225
Solyc00g013120	10.3125	Expressed	0	0.168937	0.22243	0.0478496	0.128128	0.194336	0.388351	0.205953	0.160987	0.194315	0.0325	0.330917	0.456515	0.277109	0.218761	0.355958	0.0333333	0.307798	0.226477	0.57336	0.262694	0.462049	0.383645	0.272928	0.616718	0.496628	0.1575	0.20996	0.469332	0.122338	0.21057	0.560699	0.0272845	0.303388	0.566501	0.255061	0.355434	0.123491	0.376541	0.180624	0.300094	0.254886	0.283799	0.0477842	0.183456	0.110076	0.12842
Solyc00g013130	39.9825	Expressed	2.49357	0.899676	0.643797	0.554016	0.751414	0.309068	1.00246	0.351781	0.847388	0.181447	0.539058	0.559606	1.08315	0.79147	0.499975	0.760636	0.0881917	0.903432	1.28211	1.31111	0.281913	0.762326	0.827129	0.850833	1.72291	0.301413	0.811833	0.66143	1.08473	0.296226	0.211916	0.711747	3.15121	1.00002	3.06892	0.779063	1.30727	0.277924	1.48309	1.34121	0.555298	0.338018	0.974739	0.358248	0.45364	0.14812	0.391557
Solyc00g013140	27.28	Expressed	0.0409607	0.905907	0.158561	0.742096	0.171513	0.306332	0.223979	0.342013	0.190962	0.0978413	0.294703	0.207726	0.325893	0.254505	0.515259	0.363464	0.057735	0.9972	0.353388	0.121929	0.349786	0.224402	0.220114	0.153677	0.235673	0.346049	0.190629	0.199348	0.412217	0.386488	0.324076	0.475955	0.19975	0.53533	0.252339	0.358292	0.284678	0.131909	0.499842	0.328393	0.42084	0.202382	0.154509	0.352574	0.337602	0.15845	0.110028
Solyc00g013150	0.7475		0.0757188	0.0423035	0.0525	0	0.0593015	0	0.0675	0.0275	0.0317543	0	0	0	0.0225	0	0	0.0291548	0	0.0425	0	0.0545245	0.025	0	0	0.0575	0	0	0.02	0	0.02	0.0489898	0	0.0242813	0.0866667	0	0.0175	0	0	0	0.045	0	0.0275	0.03	0.025	0	0.035	0	0.0225
Solyc00g013160	15.7225	Expressed	0.355949	0.273922	0.28114	0.243083	0.236656	0.229179	0.205852	0.25617	0.525315	0.77264	0.642189	0.386488	0.832079	0.52914	0.115641	0.348936	0	0.0831039	0.580867	0.280041	0.146138	0.151685	0.430716	0.312743	0.873569	0.475403	0.243995	0.23869	0.258489	0.218456	0.399677	0.414779	0.345302	0.190992	0.253673	0.667525	0.384911	0.362431	0.496813	0.308744	0.307852	0.687161	0.638806	0.336387	0.357057	0.434751	0.101355
Solyc00g013170	1	Expressed	0.03	0	0	0	0.025	0.0225	0	0	0	0	0	0.0225	0	0.0225	0	0	0	0	0	0.025	0	0	0.035	0	0	0	0	0	0.0384057	0	0	0.025	0	0.0635959	0	0	0	0	0.025	0	0	0	0.0497494	0.0225	0.055	0.0225	0
Solyc00g013180	27.285	Expressed	1.11429	0.554908	0.0619812	0.290832	0.464982	0.31386	0.259711	0.302131	0.355161	0.41965	0.449935	0.413985	0.616191	0.055	0.399875	0.3806	0	0.479312	0.37533	0.367046	0.149798	0.211005	0.206009	0.394596	0.710216	0.848518	0.553301	0.433001	0.647547	0.213561	0.29542	0.421354	0.164418	0.418104	0.467591	0.418357	0.411643	0.241605	0.235315	0.968358	0.821243	0.975828	0.384046	0.374308	0.480668	0.197336	0.26575
Solyc00g013190	16.4725	Expressed	0	0.100871	0.156897	0.106174	0.0834041	0.0618466	0.035	0.07099	0.0638357	0.0325	0.0309233	0.0275	0.0430842	0.0606218	0.0663325	0.0273861	0	0.266114	0.119199	0.0738241	0.0532291	0.1025	0.0733002	0.0639661	0.0738664	0.0287228	0.075	0.0246221	0.0280995	0	0.0332603	0.07565	0.203825	1.03805	0.0464579	0.219901	0.0579332	0.0347611	0.0868428	0.0695222	0.0660177	0.03	0.0831665	0.0363719	0.112324	0.0459166	0.0614241
Solyc00g013320	0		0	0	0	0	0	0	0	0	0	0	0	0	0	0	0	0	0	0	0	0	0	0	0	0	0	0	0	0	0	0	0	0	0	0	0	0	0	0	0	0	0	0	0	0	0	0	0
Solyc00g013330	0.52		0	0	0	0	0	0	0	0	0	0	0	0	0	0	0	0	0	0	0	0	0	0	0	0	0	0	0	0	0	0	0	0	0	0	0	0	0	0	0	0	0.025	0	0	0	0	0	0
Solyc00g013770	0		0	0	0	0	0	0	0	0	0	0	0	0	0	0	0	0	0	0	0	0	0	0	0	0	0	0	0	0	0	0	0	0	0	0	0	0	0	0	0	0	0	0	0	0	0	0	0
Solyc00g014170	0.0625		0	0	0	0	0	0	0	0	0	0	0	0	0	0	0	0	0	0	0	0	0	0	0	0	0	0	0	0	0	0	0	0	0	0	0	0	0	0	0	0	0	0	0.0625	0	0	0	0
Solyc00g014180	0.11		0	0	0	0	0	0	0	0	0	0	0	0	0	0	0	0	0	0	0	0	0	0	0	0	0	0	0	0	0	0	0	0	0	0	0	0	0	0	0	0	0	0	0.0590727	0	0.0275	0	0
Solyc00g014190	0.0325		0	0	0	0	0	0	0	0	0	0	0	0	0	0	0	0	0	0	0	0	0	0	0	0	0	0	0	0	0	0	0	0	0	0	0	0	0	0	0	0	0	0	0	0	0	0	0
Solyc00g014290	0.045		0	0	0	0	0	0	0	0	0	0	0	0	0	0	0	0	0	0	0	0	0	0	0	0	0	0	0	0	0	0	0	0	0	0	0	0	0	0	0	0	0	0	0	0	0	0	0
Solyc00g014390	3.4475	Expressed	0	0.0225	0	0	0	0	0	0	0	0	0	0	0	0	0	0	0	0	0.0725	0.0267706	0	0	0	0	0	0	0	0	0	0	0	0	0	0	0.0275379	0.0317543	0	0	0	0	0	0	0	0	0	0	0
Solyc00g014790	24.27	Expressed	2.84167	0.170459	0.086253	0.0520416	0.227046	0.0502286	0.0648556	0.0533854	0.0652399	0.0990791	0.0529741	0.0452769	0.105909	0.0280995	0.109049	0.149972	1.1514	0.355586	0.105712	0.164538	0.0931285	0.105119	0.108503	0.0488834	0.132035	0.125258	0.0335099	0.0922858	0.0988581	0.0797261	0.0654949	0.136893	4.87916	3.59852	0.319909	0.101602	0.131212	0.0587899	0.28019	0.215923	0.0733144	0.128736	0.0906803	0.188475	0.173638	0.0310913	0.0952519
Solyc00g014800	2.48667	Expressed	0.493333	0.0343996	0.0496655	0.0242813	0.0337577	0.0618466	0.0342783	0.0570636	0.0904618	0.0337577	0.045	0.0548483	0.03	0.0273861	0.043589	0.0291548	0	0.118207	0.0794119	0	0.0348807	0.0558271	0.0265754	0.0298259	0.119818	0.0510514	0.0740917	0.043589	0.0473462	0.0262996	0.0677003	0.0876903	0.0866667	0	0.075111	0.0547723	0.0868428	0.0530723	0.045	0.0926463	0.0273861	0.150354	0.0423035	0.0367423	0.0332603	0.0367423	0.0656379
Solyc00g014810	1.1025	Expressed	0	0.0325	0.025	0	0	0	0	0.0275	0	0.0325	0.0825	0	0.0225	0	0	0	0	0	0.0225	0.0478714	0	0	0	0	0	0.0287228	0	0.0225	0	0	0.0225	0.0125	0	0	0.02529	0.0275	0.0325	0.0275	0.162481	0.0325	0	0.025	0.0303795	0.0259808	0.0325	0	0.025
Solyc00g014820	2.22	Expressed	0	0.0225	0.025	0.0275	0.0593015	0.0225	0.0275	0.0548483	0.0275	0	0.0225	0	0	0	0	0.0135401	0	0.0563286	0.0275	0.121929	0.0436606	0.03	0.03	0.03	0.0390246	0.025	0	0.0625	0.035	0	0.045	0.0470815	0.03	0	0.0355903	0.03	0.0375278	0.0275	0.0410284	0.0319831	0.0275	0.025	0.116082	0.0409268	0.0732006	0.0225462	0.031225
Solyc00g014830	64.75	Expressed	5.12605	1.72363	1.43634	0.271581	0.612609	1.56111	0.493869	0.693089	0.437957	0.429632	0.776771	0.255486	0.634619	0.383036	0.4255	0.504926	0.0417665	1.94328	2.20148	1.58137	0.873369	0.472679	0.669509	0.35757	0.711928	0.421631	0.539959	0.320868	0.6867	0.266458	0.173704	0.757556	0.883069	1.76833	1.33036	0.924649	1.32229	0.563501	1.32696	0.93933	0.17466	0.980624	0.367024	0.670054	0.441576	0.398811	0.400708
Solyc00g014840	1.145	Expressed	0.156667	0.0225	0	0	0	0	0	0	0.0275	0	0	0.0225	0.0225	0	0	0	0	0	0.0325	0	0	0	0	0	0	0	0	0	0	0	0.0625	0	0.03	0.0392994	0.02529	0	0	0	0.0725	0	0	0	0.155	0	0.0544671	0	0
Solyc00g014850	18.0675	Expressed	0.03	0.452567	0.279684	0.364897	0.0777282	0.0850857	0.0205649	0.0666302	0.0712244	0.0947255	0.116216	0.11262	0.0517204	0.0868308	0.117995	0.11199	0	1.10268	0.190175	0.135	0.188033	0.1025	0.0628987	0.117145	0.123449	0.0392375	0.083504	0.0653676	0.031225	0.0460751	0.0666302	0.0543139	0.0272845	0.21	0.141208	0.132445	0.102835	0.0567707	0.0542179	0.145287	0.0618297	0.0488834	0.14006	0.12626	0.083865	0.0583095	0.213439
Solyc00g014860	9.8775	Expressed	0	0.208781	0.212343	0.184413	0.0593015	0.0430842	0.0318852	0.0504975	0.106536	0.0551513	0.0919579	0.0625167	0.0265754	0.0595819	0.0646787	0.0825126	0	0.667263	0.132822	0.127565	0.100861	0.0825	0.101858	0.125366	0.203981	0.0474342	0.083504	0.0242813	0.0494132	0.0347311	0.0275	0.0715309	0	0.00881917	0.107655	0.0630476	0.114045	0.0225	0.0290115	0.0924662	0.0942846	0.0275	0.152042	0.0828654	0.0438511	0.0394493	0.17423
Solyc00g014960	0		0	0	0	0	0	0	0	0	0	0	0	0	0	0	0	0	0	0	0	0	0	0	0	0	0	0	0	0	0	0	0	0	0	0	0	0	0	0	0	0	0	0	0	0	0	0	0
Solyc00g014970	0		0	0	0	0	0	0	0	0	0	0	0	0	0	0	0	0	0	0	0	0	0	0	0	0	0	0	0	0	0	0	0	0	0	0	0	0	0	0	0	0	0	0	0	0	0	0	0
Solyc00g014980	0		0	0	0	0	0	0	0	0	0	0	0	0	0	0	0	0	0	0	0	0	0	0	0	0	0	0	0	0	0	0	0	0	0	0	0	0	0	0	0	0	0	0	0	0	0	0	0
Solyc00g014990	0		0	0	0	0	0	0	0	0	0	0	0	0	0	0	0	0	0	0	0	0	0	0	0	0	0	0	0	0	0	0	0	0	0	0	0	0	0	0	0	0	0	0	0	0	0	0	0
Solyc00g015000	0		0	0	0	0	0	0	0	0	0	0	0	0	0	0	0	0	0	0	0	0	0	0	0	0	0	0	0	0	0	0	0	0	0	0	0	0	0	0	0	0	0	0	0	0	0	0	0
Solyc00g015600	0.143333		0	0	0	0	0	0	0	0	0	0	0	0	0	0	0	0	0	0	0	0	0	0	0	0	0	0	0	0	0	0	0	0	0.143333	0	0	0	0	0	0	0	0	0	0	0	0	0	0
Solyc00g015610	0.045		0	0	0	0	0	0	0	0	0	0	0	0	0	0	0	0	0	0	0	0	0	0	0	0	0	0	0	0	0	0	0	0	0	0	0	0	0	0	0	0	0	0	0	0	0	0	0
Solyc00g015720	0		0	0	0	0	0	0	0	0	0	0	0	0	0	0	0	0	0	0	0	0	0	0	0	0	0	0	0	0	0	0	0	0	0	0	0	0	0	0	0	0	0	0	0	0	0	0	0
Solyc00g015730	0		0	0	0	0	0	0	0	0	0	0	0	0	0	0	0	0	0	0	0	0	0	0	0	0	0	0	0	0	0	0	0	0	0	0	0	0	0	0	0	0	0	0	0	0	0	0	0
Solyc00g015740	0.0475		0	0	0	0.0275	0	0	0	0	0	0	0	0	0	0	0	0	0	0	0	0	0	0	0	0	0	0	0	0	0	0	0	0	0	0	0	0	0	0	0	0	0	0	0	0	0	0	0
Solyc00g015750	0		0	0	0	0	0	0	0	0	0	0	0	0	0	0	0	0	0	0	0	0	0	0	0	0	0	0	0	0	0	0	0	0	0	0	0	0	0	0	0	0	0	0	0	0	0	0	0
Solyc00g015760	0		0	0	0	0	0	0	0	0	0	0	0	0	0	0	0	0	0	0	0	0	0	0	0	0	0	0	0	0	0	0	0	0	0	0	0	0	0	0	0	0	0	0	0	0	0	0	0
Solyc00g015770	0.09		0	0	0	0	0	0	0	0	0	0	0	0	0	0	0	0	0	0	0	0	0	0	0	0	0	0	0	0	0	0	0	0	0	0	0	0	0	0	0	0	0	0	0	0	0	0	0
Solyc00g016470	0		0	0	0	0	0	0	0	0	0	0	0	0	0	0	0	0	0	0	0	0	0	0	0	0	0	0	0	0	0	0	0	0	0	0	0	0	0	0	0	0	0	0	0	0	0	0	0
Solyc00g016480	0		0	0	0	0	0	0	0	0	0	0	0	0	0	0	0	0	0	0	0	0	0	0	0	0	0	0	0	0	0	0	0	0	0	0	0	0	0	0	0	0	0	0	0	0	0	0	0
Solyc00g016490	0		0	0	0	0	0	0	0	0	0	0	0	0	0	0	0	0	0	0	0	0	0	0	0	0	0	0	0	0	0	0	0	0	0	0	0	0	0	0	0	0	0	0	0	0	0	0	0
Solyc00g016590	0.0275		0	0	0	0	0	0	0	0	0	0	0	0	0	0	0	0	0	0	0	0	0	0	0	0	0	0	0	0	0	0	0	0	0	0	0	0	0	0	0	0	0	0	0	0	0	0	0
Solyc00g016790	0.0925		0	0	0	0	0	0	0	0	0	0	0	0	0	0	0	0	0	0	0	0	0	0	0	0	0	0	0	0	0	0	0	0	0	0	0	0	0	0	0	0	0	0	0.03	0	0	0	0
Solyc00g016890	0		0	0	0	0	0	0	0	0	0	0	0	0	0	0	0	0	0	0	0	0	0	0	0	0	0	0	0	0	0	0	0	0	0	0	0	0	0	0	0	0	0	0	0	0	0	0	0
Solyc00g016900	0		0	0	0	0	0	0	0	0	0	0	0	0	0	0	0	0	0	0	0	0	0	0	0	0	0	0	0	0	0	0	0	0	0	0	0	0	0	0	0	0	0	0	0	0	0	0	0
Solyc00g016910	0		0	0	0	0	0	0	0	0	0	0	0	0	0	0	0	0	0	0	0	0	0	0	0	0	0	0	0	0	0	0	0	0	0	0	0	0	0	0	0	0	0	0	0	0	0	0	0
Solyc00g017210	0.09		0	0	0	0.045	0	0	0	0	0	0	0	0	0	0	0	0	0.09	0	0	0	0	0	0	0	0	0	0	0	0	0	0	0	0	0	0	0	0	0	0	0	0	0	0	0	0	0	0
Solyc00g017220	0.2075		0	0.0246221	0	0	0	0	0	0	0	0	0	0	0	0	0	0	0	0.02	0	0	0	0	0	0	0	0	0	0	0	0	0	0	0	0	0	0	0	0	0	0	0	0	0	0	0	0	0
Solyc00g017230	0.17		0	0	0	0.025	0	0	0	0	0	0	0	0	0	0	0	0	0	0	0	0	0	0	0	0	0	0.015	0	0	0	0	0	0	0	0	0	0	0	0	0	0	0	0	0	0	0	0	0
Solyc00g017530	0.155		0	0.0423035	0	0.0370529	0	0	0	0	0	0	0.0225	0	0	0	0	0	0	0.0241523	0.0473462	0	0	0	0	0	0	0	0	0	0	0.02	0	0	0	0	0.0335099	0	0	0	0.0275	0	0	0	0	0	0	0	0
Solyc00g017540	0.7225		0	0	0	0.025	0.025	0	0	0	0	0	0	0	0	0	0	0	0	0.0325	0.0291548	0.0275	0	0	0	0	0	0	0	0	0	0	0	0	0	0	0.0878801	0.0743163	0.0375278	0.025	0	0	0	0	0.025	0	0	0	0
Solyc00g017550	0.755		0	0	0	0	0	0	0	0	0	0	0	0	0	0	0	0	0	0	0.0225	0	0	0	0	0	0	0	0	0	0	0	0	0	0	0	0.088353	0.0375	0.0325	0	0	0	0	0	0	0	0	0	0
Solyc00g017750	0.0675		0	0	0	0	0	0	0	0	0	0	0	0	0	0	0	0	0	0	0	0	0	0	0	0	0	0	0	0	0	0	0	0	0	0	0	0	0	0	0	0	0	0	0	0	0.0325	0	0
Solyc00g017760	0.4075		0	0.0246221	0	0	0	0	0	0	0	0	0	0	0	0	0	0	0	0	0	0	0	0	0	0	0	0	0	0	0	0	0	0	0	0	0	0	0	0	0	0	0	0	0.0625	0	0	0	0
Solyc00g017860	0		0	0	0	0	0	0	0	0	0	0	0	0	0	0	0	0	0	0	0	0	0	0	0	0	0	0	0	0	0	0	0	0	0	0	0	0	0	0	0	0	0	0	0	0	0	0	0
Solyc00g017870	0		0	0	0	0	0	0	0	0	0	0	0	0	0	0	0	0	0	0	0	0	0	0	0	0	0	0	0	0	0	0	0	0	0	0	0	0	0	0	0	0	0	0	0	0	0	0	0
Solyc00g017880	0.0333333		0	0	0	0	0	0	0	0	0	0	0	0	0	0	0	0	0	0	0	0	0	0	0	0	0	0	0	0	0	0	0	0	0	0	0	0	0	0	0	0	0	0	0	0	0	0	0
Solyc00g017890	0		0	0	0	0	0	0	0	0	0	0	0	0	0	0	0	0	0	0	0	0	0	0	0	0	0	0	0	0	0	0	0	0	0	0	0	0	0	0	0	0	0	0	0	0	0	0	0
Solyc00g017900	0		0	0	0	0	0	0	0	0	0	0	0	0	0	0	0	0	0	0	0	0	0	0	0	0	0	0	0	0	0	0	0	0	0	0	0	0	0	0	0	0	0	0	0	0	0	0	0
Solyc00g017910	0		0	0	0	0	0	0	0	0	0	0	0	0	0	0	0	0	0	0	0	0	0	0	0	0	0	0	0	0	0	0	0	0	0	0	0	0	0	0	0	0	0	0	0	0	0	0	0
Solyc00g017920	0.0275		0	0	0	0	0	0	0	0	0	0	0	0	0	0	0	0	0	0	0	0	0	0	0	0	0	0	0	0	0	0	0	0	0	0	0	0	0	0	0	0	0	0	0	0	0	0	0
Solyc00g017930	0.0475		0	0	0	0	0	0	0	0	0	0	0	0	0	0	0	0	0	0	0	0	0	0	0	0	0	0	0	0	0	0	0	0	0	0	0	0	0	0	0	0	0	0	0	0	0	0	0
Solyc00g018760	0		0	0	0	0	0	0	0	0	0	0	0	0	0	0	0	0	0	0	0	0	0	0	0	0	0	0	0	0	0	0	0	0	0	0	0	0	0	0	0	0	0	0	0	0	0	0	0
Solyc00g018770	0		0	0	0	0	0	0	0	0	0	0	0	0	0	0	0	0	0	0	0	0	0	0	0	0	0	0	0	0	0	0	0	0	0	0	0	0	0	0	0	0	0	0	0	0	0	0	0
Solyc00g018970	0.0433333		0	0	0	0	0	0	0	0	0	0	0	0	0	0	0	0	0	0	0	0	0	0	0	0	0	0	0	0	0	0	0	0	0	0	0	0	0	0	0	0	0	0	0	0	0.0275	0	0
Solyc00g019610	0		0	0	0	0	0	0	0	0	0	0	0	0	0	0	0	0	0	0	0	0	0	0	0	0	0	0	0	0	0	0	0	0	0	0	0	0	0	0	0	0	0	0	0	0	0	0	0
Solyc00g019620	0		0	0	0	0	0	0	0	0	0	0	0	0	0	0	0	0	0	0	0	0	0	0	0	0	0	0	0	0	0	0	0	0	0	0	0	0	0	0	0	0	0	0	0	0	0	0	0
Solyc00g019630	0		0	0	0	0	0	0	0	0	0	0	0	0	0	0	0	0	0	0	0	0	0	0	0	0	0	0	0	0	0	0	0	0	0	0	0	0	0	0	0	0	0	0	0	0	0	0	0
Solyc00g019730	12.995	Expressed	0.04	0.310118	0.174093	0.1767	0.0956556	0.0593015	0.0813429	0.0510514	0.0528165	0.0492231	0.113541	0.068374	0.0626332	0.0309233	0.175754	0.148885	0.0333333	0.488603	0.110255	0.0782491	0.067992	0.0801561	0.0907836	0.109649	0.080829	0.0221736	0.0370529	0.0246221	0.0384057	0.0852814	0.0581664	0.101201	0.03	0	0.0471478	0.118559	0.200265	0.0456435	0.173542	0.261928	0.10499	0.14682	0.0470815	0.0729583	0.0511534	0.0524404	0.0537742
Solyc00g019740	133.377	Expressed	0.0360555	1.56587	0.749116	1.1887	0.358547	0.277139	0.311742	0.222949	0.231391	0.374553	0.25671	0.086253	0.46992	0.106644	0.311207	0.430562	0.0333333	2.75023	0.262964	0.188282	0.338929	0.28905	0.15052	0.542469	0.292785	0.225204	0.18198	0.154239	0.159863	0.167351	0.20079	0.354225	0.0762306	0	0.284704	0.334191	0.464173	0.317369	0.243995	0.310765	0.244178	0.287094	0.25035	0.103158	0.194181	0.114782	0.308828
Solyc00g019750	76.87	Expressed	0.141539	0.605122	0.539635	0.149833	0.583543	0.230484	0.198804	0.202212	0.247904	0.261832	0.144012	0.121749	0.25815	0.0770822	0.276842	0.393415	0.0666667	1.81302	0.730377	0.191855	0.23153	0.234356	0.142302	0.185714	0.0629153	0.0271953	0.173943	0.150582	0.0694022	0.121269	0.202582	0.371068	0.478063	0.633114	0.2075	0.254067	0.132508	0.0825	0.392906	0.0585057	0.126425	0.137439	0.141833	0.147224	0.19283	0.146707	0.169134
Solyc00g019950	17.265	Expressed	0.04	0.284561	0.0821964	0.222762	0.025	0.0561805	0.0405175	0.0501664	0.0518612	0.0551513	0.0225	0.0234521	0.0675	0.0366003	0.103552	0.0994464	0.276667	0.639419	0.0775	0.0632949	0.0829031	0.03	0.0531311	0.0355903	0.00946485	0.0500625	0.0623665	0.0442295	0.0366003	0.0155456	0.0290115	0.11669	1.10074	0.113725	0.106252	0.0290115	0.0317543	0.0423035	0.0826009	0.114964	0.0291548	0.0778219	0.140653	0.0217945	0.0470815	0.0419076	0.110406
Solyc00g019960	1.0025	Expressed	0.04	0	0.025	0	0	0.0309233	0	0.0275	0	0.0325	0	0	0.0225	0	0.025	0.0332603	0.031798	0	0	0	0.0225	0	0	0	0.035	0.025	0	0.045	0.0325	0	0	0.0325	0.448788	0.0366667	0.0335099	0	0	0.0525	0.0483692	0	0	0	0.089861	0	0.060879	0	0.0217466
Solyc00g019970	3.95333	Expressed	0.04	0.0246221	0.025	0	0.0525	0.0309233	0	0.0275	0.0275	0.0325	0.0309233	0.0275	0.045	0.0275	0.025	0.0552834	0.0520683	0	0	0	0.0327872	0	0.0325	0	0.035	0.0510514	0.05	0.045	0.0325	0	0	0.0283945	0.116667	0.112891	0.0662539	0	0	0.0525	0.0411045	0.0275	0	0	0.100115	0	0.0332603	0.025	0.0217466
Solyc00g019980	2.3375	Expressed	0.0933333	0.0779423	0.0348807	0.0476751	0.0433974	0.0535996	0.0475	0.1175	0.0466369	0.0325	0.0283945	0.0259808	0.0259808	0.0275	0.045	0.0747217	0	0.041508	0.084212	0.367908	0.0613732	0.06	0.00645497	0.0298259	0	0.0625	0.0355903	0.0246221	0.0275	0.02	0.0275	0.0239357	0	0.0392994	0.0540062	0.100457	0.0361421	0.0275	0.0686021	0.0347311	0.03	0.14812	0.130926	0.064727	0.0390246	0.0275	0.0367423
Solyc00g019990	1.155	Expressed	0.156667	0.0458939	0.035678	0.0442295	0.0303795	0	0.0225	0.06	0.0371932	0	0.034641	0.0225	0	0	0.0225	0.0570636	0	0.0738664	0.0517003	0.0303795	0.0325	0.03	0.03	0.03	0.025	0.0475	0.035	0.02	0	0.0425	0	0.0239357	0.0272845	0.151694	0.0714143	0.065	0.03	0.0246221	0.0303795	0	0.03	0	0.0731864	0.0425	0	0.0275	0.0367423
Solyc00g020000	1.645	Expressed	0.0669162	0.0430842	0.025	0	0	0.0425	0	0.0325	0.0225	0	0.0225	0.0275	0	0.0225	0.0596343	0.0273861	0.104403	0.064469	0	0	0	0	0.0325	0	0.07	0	0.0262996	0.045	0.0390246	0.0548483	0.0309233	0.0212132	0.2	0.296667	0	0.0332603	0	0	0.0892912	0.0319831	0.025	0.0275	0.13616	0	0.0944281	0.025	0.0275
Solyc00g020010	11.2375	Expressed	2.09727	0.198804	0.214879	0.184932	0.197674	0.147789	0.107121	0.215885	0.251976	0.312597	0.0841006	0.228491	0.221378	0.306523	0.294307	0.403575	3.458	0.319831	0.298482	0.375555	0.117571	0.197273	0.225924	0.141686	0.0854888	0.147564	0.0885532	0.11891	0.368352	0.135431	0.220241	0.1776	0.939687	1.82194	0.281025	0.195294	0.189846	0.0735414	0.147789	0.255832	0.311769	0.171385	0.167699	0.212662	0.217888	0.272611	0.258888
Solyc00g020020	6.21667	Expressed	0.725465	0.0681909	0.0242813	0.0881641	0.025	0	0.0325	0.0579332	0.0291548	0.0325	0	0.0388104	0	0.0377492	0.0589491	0.0495606	0.03	0.166258	0.0517204	0.025	0	0.03	0.03	0.0325	0	0.0525	0	0.0246221	0.0322749	0.0332603	0.0332603	0.0666302	0.0491031	0.21	0.0683587	0.0618466	0.0325	0.023094	0.0275	0.02	0	0.025	0.201536	0.0327872	0.1187	0	0.0225
Solyc00g020030	6.53	Expressed	4.48333	0.319671	0.274636	0.147047	0.118207	0.0946485	0.0657489	0.00478714	0.129357	0.0423035	0.0280995	0.0980646	0.107577	0.0225	0.145888	0.254689	0	0.33245	0.0884473	0.163165	0.0924662	0.140379	0.136931	0.0362859	0.128062	0.0788855	0.11884	0.0620987	0.106331	0.0592136	0.0417083	0.242109	2.3067	0.0648931	0.0654472	0.0314576	0.0492231	0.0429146	0.0630311	0.0506623	0.125855	0.292603	0.0996975	0.119199	0.192673	0.149241	0.29004
Solyc00g020040	0.8375		0	0.02	0.0636396	0.0789515	0	0	0.0225	0	0.0317543	0.0375278	0	0.0563471	0.0275	0.03	0.0925	0.03	0	0.137417	0.0325	0.0303795	0	0.03	0	0	0	0.025	0.02	0.0246221	0	0.02	0.0225	0.07565	0	0	0.0355903	0.03	0	0	0.05	0.0225	0.0570636	0.0325	0.05	0.0225	0.0404145	0.0175	0.0225
Solyc00g020440	0.045		0	0	0	0	0	0	0	0	0	0	0	0	0	0	0	0	0	0	0	0	0	0	0	0	0	0	0	0	0	0	0	0	0	0	0	0	0	0	0	0	0	0	0	0	0	0	0
Solyc00g020540	1.12333	Expressed	0	0	0	0.0275	0	0.0309233	0	0	0.0275	0	0	0	0	0	0	0	0	0.0389444	0	0	0	0	0	0	0	0	0	0	0	0	0	0	0	0	0.0419076	0	0	0	0	0	0	0	0	0	0.0275	0	0
Solyc00g020840	0.3		0.04	0	0	0	0	0	0	0	0	0	0	0.0225	0.0225	0	0.025	0.0332603	0	0	0	0.05	0.0325	0	0	0.0337577	0	0.03	0.02	0.0225	0.0325	0.0275	0	0.0355903	0	0	0	0.0275	0.03	0.0275	0.0303795	0	0.0510514	0.0348807	0.0658913	0.0612883	0.0992786	0.055	0.0658913
Solyc00g020940	0		0	0	0	0	0	0	0	0	0	0	0	0	0	0	0	0	0	0	0	0	0	0	0	0	0	0	0	0	0	0	0	0	0	0	0	0	0	0	0	0	0	0	0	0	0	0	0
Solyc00g020950	0		0	0	0	0	0	0	0	0	0	0	0	0	0	0	0	0	0	0	0	0	0	0	0	0	0	0	0	0	0	0	0	0	0	0	0	0	0	0	0	0	0	0	0	0	0	0	0
Solyc00g020960	0		0	0	0	0	0	0	0	0	0	0	0	0	0	0	0	0	0	0	0	0	0	0	0	0	0	0	0	0	0	0	0	0	0	0	0	0	0	0	0	0	0	0	0	0	0	0	0
Solyc00g020970	0		0	0	0	0	0	0	0	0	0	0	0	0	0	0	0	0	0	0	0	0	0	0	0	0	0	0	0	0	0	0	0	0	0	0	0	0	0	0	0	0	0	0	0	0	0	0	0
Solyc00g020980	0		0	0	0	0	0	0	0	0	0	0	0	0	0	0	0	0	0	0	0	0	0	0	0	0	0	0	0	0	0	0	0	0	0	0	0	0	0	0	0	0	0	0	0	0	0	0	0
Solyc00g020990	0.03		0	0	0	0	0	0	0	0	0	0	0	0	0	0	0	0	0	0	0	0	0	0	0	0	0	0	0	0	0	0	0	0	0	0	0	0	0	0	0	0.0275	0	0	0	0	0	0	0
Solyc00g021490	0.0225		0	0	0	0	0	0	0	0	0	0	0	0	0	0	0	0	0	0	0	0	0	0	0	0	0	0	0	0	0	0	0	0	0	0	0	0	0	0	0	0	0	0	0	0	0	0	0
Solyc00g021500	0		0	0	0	0	0	0	0	0	0	0	0	0	0	0	0	0	0	0	0	0	0	0	0	0	0	0	0	0	0	0	0	0	0	0	0	0	0	0	0	0	0	0	0	0	0	0	0
Solyc00g021510	0		0	0	0	0	0	0	0	0	0	0	0	0	0	0	0	0	0	0	0	0	0	0	0	0	0	0	0	0	0	0	0	0	0	0	0	0	0	0	0	0	0	0	0	0	0	0	0
Solyc00g021520	0		0	0	0	0	0	0	0	0	0	0	0	0	0	0	0	0	0	0	0	0	0	0	0	0	0	0	0	0	0	0	0	0	0	0	0	0	0	0	0	0	0	0	0	0	0	0	0
Solyc00g021530	0		0	0	0	0	0	0	0	0	0	0	0	0	0	0	0	0	0	0	0	0	0	0	0	0	0	0	0	0	0	0	0	0	0	0	0	0	0	0	0	0	0	0	0	0	0	0	0
Solyc00g021630	19.81	Expressed	0	0.389238	0.0980646	0.129228	0.066505	0.0361709	0.0682367	0.0335099	0.0498331	0.0643396	0.0385141	0.0497494	0.0292617	0.0731864	0.0904042	0.11619	0	0.492274	0.0450925	0.0641613	0.0545245	0.0886355	0.0579332	0.0601907	0.0715746	0.0478714	0.0766485	0.0242813	0.064984	0.113312	0.135485	0.0749444	0.0504425	0	0.102184	0.0309233	0.359128	0.163987	0.227756	0.120649	0.085574	0.0752773	0.0841006	0.161316	0.0992472	0.0347611	0.0295452
Solyc00g021640	110.965	Expressed	4.44456	0.900972	0.339963	1.0322	0.147726	0.116288	0.255746	0.178483	0.0878446	0.149297	0.129132	0.0517003	0.164082	0.152609	0.0980646	0.0833667	0.906697	1.10308	0.33856	0.412068	0.178022	0.0512144	0.208462	0.206453	0.112287	0.150914	0.0954267	0.0928597	0.21297	0.184526	0.183638	0.61891	14.9653	6.14965	0.46491	0.158246	0.719873	0.381191	0.585534	0.432673	0.241191	0.110793	0.220959	0.211439	0.171756	0.0739932	0.179878
Solyc00g021650	0.8675		0	0	0	0	0	0	0	0	0	0	0	0	0	0	0	0.03	0	0	0.0325	0	0	0	0	0	0	0.025	0.02	0	0	0	0	0	0.0866667	0	0.025	0.0275	0.0325	0	0	0	0	0.0275	0.03	0	0	0	0.0225
Solyc00g021660	3.04	Expressed	0	0.08544	0.0225	0.0409013	0.025	0.0425	0.035	0.03	0.0275	0.0325	0.0275	0	0	0.0291548	0.0225	0.03	0.0333333	0.0379693	0.0275	0	0.025	0.0361421	0.0548483	0.025	0.035	0	0.0262996	0.0225	0	0.02	0.0309233	0.0666302	0.0233333	0.303992	0	0.0275	0.0375278	0.025	0.0275	0.0757188	0.0275	0.0453459	0.0739932	0	0.035	0.0520216	0.0217466
Solyc00g022070	7.55333	Expressed	0	0.0347611	0.03	0.0253311	0.0325	0.0325	0	0.0325	0	0	0	0.0225	0.0225	0.0275	0.03	0.0225	0.03	0.0165202	0	0	0.0327872	0	0	0	0.035	0	0	0	0.0319831	0.0545245	0.0332603	0.0405175	0.0866667	0	0.0642099	0	0	0	0.116261	0	0	0.0522813	0.0485412	0	0.0348807	0	0.02529
Solyc00g022080	1.56	Expressed	0	0.0325	0.03	0.0242813	0.0325	0	0.0327872	0	0.0225	0	0.03	0.0225	0.0225	0	0.0275	0.0309233	0	0.0246221	0	0	0	0.03	0	0	0	0.015	0.025	0.02	0.0319831	0.03	0.0805191	0.0545245	0	0	0	0.0275	0.0325	0	0.0975	0	0.0275	0	0.0698063	0.0225	0.060553	0.0275	0.041508
Solyc00g022090	7.57333	Expressed	0.0833333	0.0829659	0.0725	0.0430116	0	0.0295804	0.0225	0.0275	0.0275	0.0592136	0.0574456	0.0649359	0.071458	0.0225	0.0377492	0.0575905	0.03	0.131688	0.0275	0.0592136	0.0303795	0.03	0.0348807	0.0327554	0.0512144	0.0489898	0.0612372	0.0565685	0.0352373	0.0310913	0.0262599	0.133604	0	0.0433333	0.0295452	0.0332603	0.0919239	0	0.0686021	0.0275	0	0.083504	0.122543	0.0881287	0.0566238	0.0703562	0.0507239
Solyc00g022100	35.1825	Expressed	0.0833333	0.237276	0.0796215	0.24355	0.0347311	0.0480451	0.162993	0.153677	0.160488	0.110529	0.094989	0.0643396	0.0733002	0.147161	0.12705	0.338067	1.97354	0.428726	0.178139	0.0891628	0.115929	0.0423035	0.205847	0.0620987	0.094989	0.090185	0.0508265	0.0513769	0.0253311	0.0515388	0.11199	0.173079	0.0272845	0.57709	0.115217	0.102673	0.22761	0.0534439	0.16585	0.0992786	0.0556028	0.209801	0.163783	0.0958297	0.285172	0.116726	0.197758
Solyc00g022110	244.502	Expressed	0.286667	1.91876	0.442898	1.0274	1.06362	0.235053	0.461111	0.56118	1.23953	0.998227	0.832576	1.65319	2.92237	1.70361	1.11508	6.48929	1.97354	2.19191	1.08547	0.912747	0.815629	0.650376	0.96694	0.68299	1.39542	1.02956	1.27672	2.72995	3.07061	1.86309	1.78696	4.58235	0.170978	0.624402	1.19182	0.379701	0.972154	0.065192	0.985396	0.514004	1.78466	1.06507	1.29224	0.751203	1.6996	1.80623	1.3049
Solyc00g022920	0		0	0	0	0	0	0	0	0	0	0	0	0	0	0	0	0	0	0	0	0	0	0	0	0	0	0	0	0	0	0	0	0	0	0	0	0	0	0	0	0	0	0	0	0	0	0	0
Solyc00g023020	0.0275		0	0	0	0	0	0	0	0	0	0	0	0	0	0	0	0	0	0	0	0	0	0	0	0	0	0	0	0	0	0	0	0	0	0	0	0	0	0	0	0	0	0	0	0	0	0	0
Solyc00g023030	0		0	0	0	0	0	0	0	0	0	0	0	0	0	0	0	0	0	0	0	0	0	0	0	0	0	0	0	0	0	0	0	0	0	0	0	0	0	0	0	0	0	0	0	0	0	0	0
Solyc00g023040	0		0	0	0	0	0	0	0	0	0	0	0	0	0	0	0	0	0	0	0	0	0	0	0	0	0	0	0	0	0	0	0	0	0	0	0	0	0	0	0	0	0	0	0	0	0	0	0
Solyc00g023050	0		0	0	0	0	0	0	0	0	0	0	0	0	0	0	0	0	0	0	0	0	0	0	0	0	0	0	0	0	0	0	0	0	0	0	0	0	0	0	0	0	0	0	0	0	0	0	0
Solyc00g023250	0.03		0	0	0	0	0	0	0	0	0	0	0	0	0	0	0	0	0	0	0	0	0	0	0	0	0	0	0	0	0	0	0	0	0	0	0	0	0	0	0	0	0	0	0	0	0	0	0
Solyc00g023260	0		0	0	0	0	0	0	0	0	0	0	0	0	0	0	0	0	0	0	0	0	0	0	0	0	0	0	0	0	0	0	0	0	0	0	0	0	0	0	0	0	0	0	0	0	0	0	0
Solyc00g023270	0		0	0	0	0	0	0	0	0	0	0	0	0	0	0	0	0	0	0	0	0	0	0	0	0	0	0	0	0	0	0	0	0	0	0	0	0	0	0	0	0	0	0	0	0	0	0	0
Solyc00g023470	3.16333	Expressed	0	0	0	0	0	0	0	0	0	0	0	0	0	0	0	0	0	0.0246221	0	0	0	0	0	0	0	0	0	0	0	0	0	0	0	0	0.025	0.0275	0	0	0	0	0	0	0	0	0	0	0
Solyc00g023570	2.8975	Expressed	0	0	0.0225	0.0225	0	0	0	0	0	0	0	0	0.0275	0	0	0.0469707	0	0.02	0.0303795	0	0	0	0	0	0.035	0	0.02	0.00288675	0.0325	0.03	0.0332603	0.0449073	0	0	0	0	0	0.025	0.05	0	0.0291548	0.0625	0.140327	0.0246221	0.0520216	0	0.0572276
Solyc00g023580	1.33	Expressed	0	0	0.03	0	0	0	0	0	0	0	0	0	0	0	0	0	0.0333333	0	0	0.0275	0	0	0.0275	0	0	0.015	0.02	0	0	0.025	0	0	0	0	0	0	0	0	0.025	0	0	0	0.0625	0	0	0	0
Solyc00g023590	2.725	Expressed	0	0.0458939	0.025	0	0.0348807	0.0225	0	0.0332603	0	0.0308221	0.0273861	0.0521217	0.0375	0.03	0	0.0575	0.06	0.0579332	0	0.0775	0.0325	0.034641	0.0314576	0.065	0.025	0.0731864	0.11804	0	0.035	0.0575	0.0291548	0.0306866	0.0233333	0	0.075	0.0344903	0.065	0.02	0.113679	0.0241523	0.0500625	0.0784219	0.0927699	0	0.152007	0.0225	0.0994987
Solyc00g023600	3.18	Expressed	0.01	0.0385951	0.025	0.0475	0.0325	0	0.0225	0	0.0275	0	0	0	0.045	0.0291548	0.0309233	0.0275	0.031798	0.0402854	0.0225	0.0478714	0.045	0.0325	0	0	0	0.03	0.0325	0.0246221	0.02	0	0.03	0.0688598	0.123333	0.0876229	0.0298608	0.0370529	0.129003	0.0480234	0.127671	0.0517204	0.0460751	0.0860596	0.0657489	0.0409268	0.0575905	0	0.0313581
Solyc00g023700	2.2325	Expressed	0	0.074652	0.135608	0.0478714	0	0.0425	0.0225	0.065	0	0.0325	0	0	0	0	0.0225	0.0225	0	0.0286865	0.0648717	0	0	0.0596343	0.0275	0.025	0.025	0.03	0.0319831	0.0246221	0	0.0262996	0	0.0306866	0.143333	0	0.0288675	0	0.0317543	0	0.0475	0.0325	0	0	0.0275	0.0927699	0.0390246	0	0.0175
Solyc00g023710	1.8025	Expressed	0	0.0534439	0	0.0275	0	0	0	0.0325	0.0291548	0	0.03	0	0	0.0366003	0.0225	0.0366003	0	0.0246221	0.0275	0	0.0497494	0.03	0	0.0355903	0.025	0	0.0390246	0.0246221	0.0340343	0.03	0.0525	0.0398696	0.09	0	0.025	0	0.0325	0	0.0684349	0	0.025	0	0.0558831	0.0425	0.0520216	0	0.0340037
Solyc00g024010	0		0	0	0	0	0	0	0	0	0	0	0	0	0	0	0	0	0	0	0	0	0	0	0	0	0	0	0	0	0	0	0	0	0	0	0	0	0	0	0	0	0	0	0	0	0	0	0
Solyc00g024020	0		0	0	0	0	0	0	0	0	0	0	0	0	0	0	0	0	0	0	0	0	0	0	0	0	0	0	0	0	0	0	0	0	0	0	0	0	0	0	0	0	0	0	0	0	0	0	0
Solyc00g024030	0		0	0	0	0	0	0	0	0	0	0	0	0	0	0	0	0	0	0	0	0	0	0	0	0	0	0	0	0	0	0	0	0	0	0	0	0	0	0	0	0	0	0	0	0	0	0	0
Solyc00g024040	0		0	0	0	0	0	0	0	0	0	0	0	0	0	0	0	0	0	0	0	0	0	0	0	0	0	0	0	0	0	0	0	0	0	0	0	0	0	0	0	0	0	0	0	0	0	0	0
Solyc00g024050	34.515	Expressed	0	2.16729	0.948393	0.824888	0.559574	1.93711	1.52516	1.1597	1.49873	0.482399	0.739425	1.7003	1.73194	2.21465	2.25166	0.882171	0	1.27712	1.80993	1.3787	0.734488	0.404732	0.347275	0.554036	0.931263	0.792028	1.03172	0.627541	1.0516	0.657665	3.19142	0.757577	0.0566667	0.0333333	0.401692	0.672128	0.280368	0.54622	0.444503	0.22265	0.0741058	0.726893	0.406017	0.358408	0.448349	0.437731	0.697866
Solyc00g024150	170.723	Expressed	5.37334	9.99489	5.98935	3.90561	2.47645	6.88898	7.11989	5.30576	4.09714	1.85662	4.29199	6.45257	2.19231	7.35355	13.0938	4.49076	5.47419	7.1918	3.17293	8.08002	1.59835	2.96226	1.52914	1.44204	3.30745	3.70788	2.83406	1.93242	2.63397	2.23489	2.5273	3.58137	6.14352	15.501	3.53649	5.19805	2.68153	0.723832	1.2908	1.09174	0.812808	0.964171	0.852451	1.9086	1.49795	1.90031	1.46391
Solyc00g024160	25.9067	Expressed	0.588482	0	0	0.0275	0	0	0	0.0332603	0	0	0.0825	0	0.0566238	0.0675	0.0721688	0.034641	0.53964	0	0.0275	0.0483692	0	0	0	0	0.035	0	0	0	0	0	0	0	0.383898	1.1345	0	0.045	0	0	0	0	0	0	0	0	0	0	0
Solyc00g024170	0.0533333		0	0	0	0	0	0	0	0	0	0	0	0	0.03	0	0	0	0	0.02	0	0	0	0	0	0	0	0	0	0	0	0	0	0	0	0	0	0	0	0	0	0	0	0	0	0	0	0	0
Solyc00g024370	0		0	0	0	0	0	0	0	0	0	0	0	0	0	0	0	0	0	0	0	0	0	0	0	0	0	0	0	0	0	0	0	0	0	0	0	0	0	0	0	0	0	0	0	0	0	0	0
Solyc00g024570	3.705	Expressed	0	0	0	0	0	0	0	0	0	0	0	0	0	0	0	0	0	0.093039	0.0216025	0.0317543	0.0225	0	0	0	0	0	0	0	0	0	0	0	0	0	0.0920484	0.2325	0.0325	0	0	0	0	0	0	0	0	0	0
Solyc00g024670	0		0	0	0	0	0	0	0	0	0	0	0	0	0	0	0	0	0	0	0	0	0	0	0	0	0	0	0	0	0	0	0	0	0	0	0	0	0	0	0	0	0	0	0	0	0	0	0
Solyc00g024680	0		0	0	0	0	0	0	0	0	0	0	0	0	0	0	0	0	0	0	0	0	0	0	0	0	0	0	0	0	0	0	0	0	0	0	0	0	0	0	0	0	0	0	0	0	0	0	0
Solyc00g024690	0		0	0	0	0	0	0	0	0	0	0	0	0	0	0	0	0	0	0	0	0	0	0	0	0	0	0	0	0	0	0	0	0	0	0	0	0	0	0	0	0	0	0	0	0	0	0	0
Solyc00g025290	25.5133	Expressed	0.04	1.4045	0.474787	0.781297	0.77277	0.2503	0.361902	0.326889	0.545695	0.194465	0.273629	0.242126	0.454798	0.328998	0.968301	0.494596	0	1.04783	0.319348	0.27765	0.211596	0.20369	0.338748	0.534805	0.352216	0.20347	0.370877	0.243772	0.488303	0.365	0.239392	0.673857	0.502339	1.08458	0.26613	0.211936	0.24052	0.261131	0.298674	0.106566	0.169626	0.214724	0.132059	0.526838	0.204552	0.228231	0.16745
Solyc00g025300	1.0325	Expressed	0.03	0	0	0	0	0.045	0	0.0332603	0	0	0	0	0.0225	0.045	0.03	0	0.03	0.02	0	0.0275	0	0	0	0	0	0	0	0	0	0	0.0275	0.025	0.03	0.0868588	0	0.0291548	0.03	0	0.1225	0	0.03	0.0325	0.03	0.0246221	0.0449768	0	0.0175
Solyc00g025400	16.36	Expressed	0	0.0570088	0.0545245	0.0731437	0.0348807	0.0625	0	0.085	0.0225	0.0325	0	0.0388373	0.0566238	0.0225	0.045	0.0988264	0.03	0.053619	0.0866987	0.0303795	0.025	0	0.0377492	0.0355903	0	0.0244949	0.0625	0.02	0.0340343	0	0.0375	0.0754431	0.03	0.0433333	0.0131498	0	0.0325	0	0.0684349	0.0319831	0.0475	0.0361421	0.139903	0.0546771	0.054064	0.02529	0.0234521
Solyc00g025500	2.16333	Expressed	0	0.0259808	0.03	0	0.0348807	0.0531311	0	0	0.0291548	0.0325	0	0.0367423	0.0225	0.0225	0.0075	0.0752773	0.0333333	0	0.0225	0.025	0.0275	0.03	0	0	0	0.0287228	0	0.0225	0.02	0.0320156	0.0666302	0.103843	0	0.0433333	0	0.0273861	0.0361421	0.02	0.0483692	0	0.0253311	0.0298259	0.0510514	0.0561805	0.0893845	0.0451617	0.0440643
Solyc00g025510	0		0	0	0	0	0	0	0	0	0	0	0	0	0	0	0	0	0	0	0	0	0	0	0	0	0	0	0	0	0	0	0	0	0	0	0	0	0	0	0	0	0	0	0	0	0	0	0
Solyc00g025520	0		0	0	0	0	0	0	0	0	0	0	0	0	0	0	0	0	0	0	0	0	0	0	0	0	0	0	0	0	0	0	0	0	0	0	0	0	0	0	0	0	0	0	0	0	0	0	0
Solyc00g025530	0		0	0	0	0	0	0	0	0	0	0	0	0	0	0	0	0	0	0	0	0	0	0	0	0	0	0	0	0	0	0	0	0	0	0	0	0	0	0	0	0	0	0	0	0	0	0	0
Solyc00g025540	0		0	0	0	0	0	0	0	0	0	0	0	0	0	0	0	0	0	0	0	0	0	0	0	0	0	0	0	0	0	0	0	0	0	0	0	0	0	0	0	0	0	0	0	0	0	0	0
Solyc00g025650	0		0	0	0	0	0	0	0	0	0	0	0	0	0	0	0	0	0	0	0	0	0	0	0	0	0	0	0	0	0	0	0	0	0	0	0	0	0	0	0	0	0	0	0	0	0	0	0
Solyc00g025660	0.03		0	0	0	0	0	0	0	0	0	0	0	0	0	0	0	0	0	0	0	0	0	0	0	0	0	0	0	0	0	0	0	0	0	0	0	0	0	0	0	0	0	0	0	0	0	0	0
Solyc00g026160	11.075	Expressed	1.22462	0.0549242	0	0.118814	0.0275	0.0309233	0.035	0	0.0275	0	0	0.025	0	0	0	0.03	2.50667	0.0455522	0.0225	0.0736546	0.0177951	0.0678694	0.0366003	0.025	0.035	0.015	0	0.0425	0.02	0.0531507	0.0275	0.043589	0	0	0.0314576	0.266615	0.108819	0.0433974	0.0705189	0.124925	0.0872735	0.0302765	0.0278014	0.0366288	0.0366003	0.0225	0.025
Solyc00g026860	0.0333333		0	0	0	0	0	0	0	0	0	0	0	0	0	0	0	0	0	0	0	0	0	0	0	0	0	0	0	0	0	0	0	0	0	0	0	0	0	0	0	0	0	0	0	0	0	0	0
Solyc00g026870	0		0	0	0	0	0	0	0	0	0	0	0	0	0	0	0	0	0	0	0	0	0	0	0	0	0	0	0	0	0	0	0	0	0	0	0	0	0	0	0	0	0	0	0	0	0	0	0
Solyc00g026880	0		0	0	0	0	0	0	0	0	0	0	0	0	0	0	0	0	0	0	0	0	0	0	0	0	0	0	0	0	0	0	0	0	0	0	0	0	0	0	0	0	0	0	0	0	0	0	0
Solyc00g026890	0		0	0	0	0	0	0	0	0	0	0	0	0	0	0	0	0	0	0	0	0	0	0	0	0	0	0	0	0	0	0	0	0	0	0	0	0	0	0	0	0	0	0	0	0	0	0	0
Solyc00g026900	0		0	0	0	0	0	0	0	0	0	0	0	0	0	0	0	0	0	0	0	0	0	0	0	0	0	0	0	0	0	0	0	0	0	0	0	0	0	0	0	0	0	0	0	0	0	0	0
Solyc00g027120	0.07		0.04	0.0259808	0	0	0	0	0	0	0	0	0	0	0	0	0	0	0	0.02	0	0	0	0	0	0	0	0	0	0	0	0	0	0	0	0	0	0	0	0	0	0	0	0	0	0	0	0	0
Solyc00g027130	0.27		0	0	0.025	0.0767572	0.0337577	0.045	0	0.0615596	0	0	0.06	0.0225	0	0	0	0	0	0	0.0275	0.0409013	0.065	0.03	0	0.05	0	0	0	0	0	0	0	0.025	0	0	0	0.0275	0	0	0	0	0.0275	0.0625	0	0.02	0.035	0	0.02
Solyc00g027140	0.1725		0	0	0	0.05	0.0325	0.0225	0.0225	0.0490748	0.0275	0.0725	0.0566238	0.0259808	0.0225	0.0225	0	0.0332603	0	0	0	0.0483692	0	0.0575	0	0.075	0	0	0	0.0217945	0	0	0.0309233	0.0355903	0	0	0.035	0	0.03	0.02	0	0	0.0754983	0.0625	0.0606218	0.0404918	0.0666302	0.0234521	0.0582201
Solyc00g027640	0		0	0	0	0	0	0	0	0	0	0	0	0	0	0	0	0	0	0	0	0	0	0	0	0	0	0	0	0	0	0	0	0	0	0	0	0	0	0	0	0	0	0	0	0	0	0	0
Solyc00g027650	0		0	0	0	0	0	0	0	0	0	0	0	0	0	0	0	0	0	0	0	0	0	0	0	0	0	0	0	0	0	0	0	0	0	0	0	0	0	0	0	0	0	0	0	0	0	0	0
Solyc00g027660	0		0	0	0	0	0	0	0	0	0	0	0	0	0	0	0	0	0	0	0	0	0	0	0	0	0	0	0	0	0	0	0	0	0	0	0	0	0	0	0	0	0	0	0	0	0	0	0
Solyc00g027670	0.116667		0	0	0	0	0	0	0	0	0	0	0	0	0	0	0	0	0	0	0	0	0	0	0	0	0	0	0	0	0	0	0	0	0	0	0	0	0	0	0	0	0	0	0	0	0	0	0
Solyc00g027770	123.16	Expressed	9.8463	2.1222	2.7455	1.09666	2.19111	2.76676	2.30276	2.48255	3.16152	1.70503	1.65851	0.83251	2.61703	1.88938	1.99423	2.86525	3.18781	3.10485	1.4639	1.21948	1.19954	1.73062	3.64479	1.81892	2.41769	2.26414	1.20997	2.1798	1.00789	0.493702	3.44302	1.77631	12.9331	7.42181	1.25945	0.781825	3.16821	2.05815	0.590669	2.03378	1.77866	0.715837	2.17025	1.05298	2.70851	1.46184	1.83775
Solyc00g027870	0.9625		0	0	0	0	0	0	0	0	0	0	0	0	0	0	0	0.03	0	0	0	0	0	0	0	0	0	0	0	0	0	0	0	0	0	0	0	0.0291548	0	0	0	0	0	0.03	0	0	0	0	0
Solyc00g027970	0		0	0	0	0	0	0	0	0	0	0	0	0	0	0	0	0	0	0	0	0	0	0	0	0	0	0	0	0	0	0	0	0	0	0	0	0	0	0	0	0	0	0	0	0	0	0	0
Solyc00g027980	0		0	0	0	0	0	0	0	0	0	0	0	0	0	0	0	0	0	0	0	0	0	0	0	0	0	0	0	0	0	0	0	0	0	0	0	0	0	0	0	0	0	0	0	0	0	0	0
Solyc00g027990	0		0	0	0	0	0	0	0	0	0	0	0	0	0	0	0	0	0	0	0	0	0	0	0	0	0	0	0	0	0	0	0	0	0	0	0	0	0	0	0	0	0	0	0	0	0	0	0
Solyc00g028090	0		0	0	0	0	0	0	0	0	0	0	0	0	0	0	0	0	0	0	0	0	0	0	0	0	0	0	0	0	0	0	0	0	0	0	0	0	0	0	0	0	0	0	0	0	0	0	0
Solyc00g028100	0		0	0	0	0	0	0	0	0	0	0	0	0	0	0	0	0	0	0	0	0	0	0	0	0	0	0	0	0	0	0	0	0	0	0	0	0	0	0	0	0	0	0	0	0	0	0	0
Solyc00g028110	0		0	0	0	0	0	0	0	0	0	0	0	0	0	0	0	0	0	0	0	0	0	0	0	0	0	0	0	0	0	0	0	0	0	0	0	0	0	0	0	0	0	0	0	0	0	0	0
Solyc00g028120	0		0	0	0	0	0	0	0	0	0	0	0	0	0	0	0	0	0	0	0	0	0	0	0	0	0	0	0	0	0	0	0	0	0	0	0	0	0	0	0	0	0	0	0	0	0	0	0
Solyc00g028420	0.13		0	0	0	0	0	0	0	0	0	0	0	0	0	0	0	0	0	0	0	0	0	0	0	0	0	0	0	0	0	0	0	0	0	0	0	0.0225	0	0	0	0	0	0	0	0	0	0	0
Solyc00g028520	0.0275		0	0	0	0	0	0	0	0	0	0	0	0	0	0	0	0	0	0	0	0	0	0	0	0	0	0	0	0	0	0	0	0	0	0	0	0	0	0	0	0	0	0	0	0	0	0	0
Solyc00g028530	0		0	0	0	0	0	0	0	0	0	0	0	0	0	0	0	0	0	0	0	0	0	0	0	0	0	0	0	0	0	0	0	0	0	0	0	0	0	0	0	0	0	0	0	0	0	0	0
Solyc00g028540	0		0	0	0	0	0	0	0	0	0	0	0	0	0	0	0	0	0	0	0	0	0	0	0	0	0	0	0	0	0	0	0	0	0	0	0	0	0	0	0	0	0	0	0	0	0	0	0
Solyc00g028550	0		0	0	0	0	0	0	0	0	0	0	0	0	0	0	0	0	0	0	0	0	0	0	0	0	0	0	0	0	0	0	0	0	0	0	0	0	0	0	0	0	0	0	0	0	0	0	0
Solyc00g028560	0		0	0	0	0	0	0	0	0	0	0	0	0	0	0	0	0	0	0	0	0	0	0	0	0	0	0	0	0	0	0	0	0	0	0	0	0	0	0	0	0	0	0	0	0	0	0	0
Solyc00g028760	2.22333	Expressed	0	0	0	0	0	0	0	0	0	0	0	0	0	0	0	0	0	0.0188746	0	0	0	0	0	0	0	0	0	0	0	0	0	0.0125	0	0	0	0	0	0	0	0	0	0	0	0	0	0	0
Solyc00g028960	0.03		0	0	0	0	0	0	0	0	0	0	0	0	0	0	0	0	0	0	0	0	0	0	0	0	0	0	0.02	0	0	0	0	0	0	0	0	0	0	0	0	0	0	0	0	0	0	0	0
Solyc00g029060	0		0	0	0	0	0	0	0	0	0	0	0	0	0	0	0	0	0	0	0	0	0	0	0	0	0	0	0	0	0	0	0	0	0	0	0	0	0	0	0	0	0	0	0	0	0	0	0
Solyc00g029070	0		0	0	0	0	0	0	0	0	0	0	0	0	0	0	0	0	0	0	0	0	0	0	0	0	0	0	0	0	0	0	0	0	0	0	0	0	0	0	0	0	0	0	0	0	0	0	0
Solyc00g029080	0		0	0	0	0	0	0	0	0	0	0	0	0	0	0	0	0	0	0	0	0	0	0	0	0	0	0	0	0	0	0	0	0	0	0	0	0	0	0	0	0	0	0	0	0	0	0	0
Solyc00g029090	0		0	0	0	0	0	0	0	0	0	0	0	0	0	0	0	0	0	0	0	0	0	0	0	0	0	0	0	0	0	0	0	0	0	0	0	0	0	0	0	0	0	0	0	0	0	0	0
Solyc00g029190	0.1475		0	0	0.025	0.0275	0	0	0	0.0325	0.0275	0	0	0	0	0	0	0	0	0.0278014	0	0	0.0275	0	0	0	0	0	0	0	0	0	0	0	0	0	0	0	0	0	0	0	0	0	0	0	0	0	0
Solyc00g029290	0		0	0	0	0	0	0	0	0	0	0	0	0	0	0	0	0	0	0	0	0	0	0	0	0	0	0	0	0	0	0	0	0	0	0	0	0	0	0	0	0	0	0	0	0	0	0	0
Solyc00g029300	0.03		0	0	0	0	0	0	0	0	0	0	0	0	0	0	0	0	0	0	0	0	0	0	0	0	0	0	0	0	0	0	0	0	0	0	0	0	0	0	0	0	0	0	0	0	0	0	0
Solyc00g029500	0.0775		0	0	0	0	0	0	0	0	0	0	0	0	0	0	0	0	0	0	0	0.025	0	0	0	0	0	0	0	0	0	0	0	0	0	0	0	0	0	0	0	0	0	0	0	0	0	0	0
Solyc00g029800	0.0325		0	0	0	0	0	0	0	0	0	0	0	0	0	0	0	0	0	0	0	0	0	0	0	0	0	0	0	0	0	0	0	0	0	0	0	0	0	0	0	0	0	0	0	0	0	0	0
Solyc00g030000	0.885		0	0	0	0.0225	0	0	0	0	0.0275	0	0.0663325	0.0472582	0.115758	0.108349	0.159269	0.0508265	0.03	0	0	0	0	0	0	0	0.0325	0.0521816	0.0319831	0.0905539	0.111084	0.0935414	0.115938	0.02136	0	0	0	0	0	0	0.0275	0	0.0470815	0.285365	0.157606	0.186123	0.0487126	0.053619	0.122134
Solyc00g030100	0.36		0	0	0	0	0	0	0	0	0	0	0	0	0	0	0.025	0	0	0	0	0	0	0	0	0	0	0	0	0	0	0	0	0	0	0	0	0	0	0	0	0	0.0225	0	0	0	0	0	0
Solyc00g030110	0		0	0	0	0	0	0	0	0	0	0	0	0	0	0	0	0	0	0	0	0	0	0	0	0	0	0	0	0	0	0	0	0	0	0	0	0	0	0	0	0	0	0	0	0	0	0	0
Solyc00g030210	0.0433333		0	0	0	0	0	0	0	0	0	0	0	0	0	0	0	0	0	0	0	0	0	0	0	0	0	0	0	0	0	0	0	0	0	0	0	0	0	0	0	0	0	0	0	0	0	0	0
Solyc00g030510	5.46667	Expressed	0	0.117783	0.0537742	0.0475	0.0525	0	0	0	0	0	0	0	0	0	0	0	0	0.0873093	0.068374	0.025	0.0225	0.03	0	0	0	0.015	0	0	0	0	0	0.0239357	5.46667	0	0.10053	0	0.0325	0	0	0	0	0	0	0.0425	0	0	0.025
Solyc00g030520	21.58	Expressed	0.996109	0.571919	1.17997	0.48226	0.430124	0.106066	0.419014	0.642372	0.55351	0.432435	0.670789	0.401567	0.475342	0.444529	0.223881	0.261836	1.70504	0.735652	0.37705	0.270104	0.161626	0.491079	0.255229	0.32744	0.530487	0.7769	0.899207	0.289953	0.513176	0.459463	0.504596	0.248076	0.184782	3.17175	0.196129	0.710364	0.376572	0.314255	0.441142	0.690833	0.234627	0.682659	0.849696	0.459826	0.81749	0.242298	0.131045
Solyc00g030820	0.3125		0	0.0259808	0.025	0.0475	0.0569356	0.0381608	0.0542179	0.0710047	0.0451848	0.113385	0.0533073	0.0475	0.0291548	0.035	0.0309233	0.034641	0	0.0275	0.0291548	0.0478714	0.0686021	0.034641	0.0675	0.0239792	0.105	0.0420317	0.0830035	0.0519615	0.035	0	0.056032	0.0693421	0	0	0	0.0275	0.0675	0.0347611	0.0601907	0.0348807	0.06	0.0298259	0.0500625	0	0.035	0	0.0217466
Solyc00g031020	0.1225		0	0	0	0	0	0	0	0	0.0275	0	0	0.025	0	0	0	0.03	0	0.0246221	0	0.05	0	0	0	0.0325	0	0	0	0	0	0	0	0	0	0	0	0	0	0	0	0	0	0.025	0.025	0.0225	0	0	0.0175
Solyc00g031030	0		0	0	0	0	0	0	0	0	0	0	0	0	0	0	0	0	0	0	0	0	0	0	0	0	0	0	0	0	0	0	0	0	0	0	0	0	0	0	0	0	0	0	0	0	0	0	0
Solyc00g031040	0		0	0	0	0	0	0	0	0	0	0	0	0	0	0	0	0	0	0	0	0	0	0	0	0	0	0	0	0	0	0	0	0	0	0	0	0	0	0	0	0	0	0	0	0	0	0	0
Solyc00g031050	0		0	0	0	0	0	0	0	0	0	0	0	0	0	0	0	0	0	0	0	0	0	0	0	0	0	0	0	0	0	0	0	0	0	0	0	0	0	0	0	0	0	0	0	0	0	0	0
Solyc00g031060	0.07		0	0	0	0	0	0	0	0	0	0	0	0	0	0	0	0	0	0	0	0	0	0	0	0	0	0	0	0	0	0	0	0	0	0	0	0	0	0	0	0	0	0	0.03	0	0.0404145	0	0
Solyc00g031360	0.125		0	0	0	0	0	0.0325	0	0.06	0	0	0	0	0	0	0	0	0	0	0	0.0275	0	0.0625	0.0548483	0.0946485	0	0	0.02	0	0	0	0	0	0	0	0	0.0225	0	0	0.025	0	0	0	0	0	0	0	0
Solyc00g031370	0		0	0	0	0	0	0	0	0	0	0	0	0	0	0	0	0	0	0	0	0	0	0	0	0	0	0	0	0	0	0	0	0	0	0	0	0	0	0	0	0	0	0	0	0	0	0	0
Solyc00g031380	0		0	0	0	0	0	0	0	0	0	0	0	0	0	0	0	0	0	0	0	0	0	0	0	0	0	0	0	0	0	0	0	0	0	0	0	0	0	0	0	0	0	0	0	0	0	0	0
Solyc00g031390	0		0	0	0	0	0	0	0	0	0	0	0	0	0	0	0	0	0	0	0	0	0	0	0	0	0	0	0	0	0	0	0	0	0	0	0	0	0	0	0	0	0	0	0	0	0	0	0
Solyc00g031490	0		0	0	0	0	0	0	0	0	0	0	0	0	0	0	0	0	0	0	0	0	0	0	0	0	0	0	0	0	0	0	0	0	0	0	0	0	0	0	0	0	0	0	0	0	0	0	0
Solyc00g031500	0		0	0	0	0	0	0	0	0	0	0	0	0	0	0	0	0	0	0	0	0	0	0	0	0	0	0	0	0	0	0	0	0	0	0	0	0	0	0	0	0	0	0	0	0	0	0	0
Solyc00g031700	0		0	0	0	0	0	0	0	0	0	0	0	0	0	0	0	0	0	0	0	0	0	0	0	0	0	0	0	0	0	0	0	0	0	0	0	0	0	0	0	0	0	0	0	0	0	0	0
Solyc00g031710	0		0	0	0	0	0	0	0	0	0	0	0	0	0	0	0	0	0	0	0	0	0	0	0	0	0	0	0	0	0	0	0	0	0	0	0	0	0	0	0	0	0	0	0	0	0	0	0
Solyc00g031720	0		0	0	0	0	0	0	0	0	0	0	0	0	0	0	0	0	0	0	0	0	0	0	0	0	0	0	0	0	0	0	0	0	0	0	0	0	0	0	0	0	0	0	0	0	0	0	0
Solyc00g031730	0		0	0	0	0	0	0	0	0	0	0	0	0	0	0	0	0	0	0	0	0	0	0	0	0	0	0	0	0	0	0	0	0	0	0	0	0	0	0	0	0	0	0	0	0	0	0	0
Solyc00g032030	1.1925	Expressed	0	0	0	0.025	0.0325	0.03	0.0327872	0.0325	0	0.025	0.0520216	0.0275	0.0332603	0.0104083	0.0320156	0.0548483	0	0.0325	0	0.045	0.0286865	0	0.0618466	0	0	0.0244949	0.025	0	0	0.0275	0	0.0225	0	0	0	0.098192	0.0625	0.02	0.0309233	0	0.0225	0.096036	0.025	0.0246221	0	0.02529	0.02
Solyc00g032230	0.0675		0	0	0	0	0	0	0	0	0	0	0	0	0	0	0	0	0	0	0	0	0	0	0	0	0	0	0	0	0	0	0	0	0	0	0	0	0	0	0	0	0	0	0	0	0	0	0
Solyc00g032940	0.04		0	0	0	0	0	0	0	0	0	0	0	0	0	0	0	0	0.03	0	0	0	0	0	0	0	0	0	0	0	0	0	0	0	0	0	0	0	0	0	0	0	0	0	0	0	0	0	0
Solyc00g033460	8.49667	Expressed	0.394982	0.366572	0.176275	0.0288675	0.0433974	0	0.0325	0	0	0.0325	0	0	0	0	0	0	0.0333333	0.403203	0.115	0.085	0	0.0625	0	0	0	0	0.025	0	0	0	0	0	0	0.185502	0.620558	0.0479583	0	0	0	0	0	0	0	0	0	0	0
Solyc00g033860	0.0225		0	0	0	0	0	0	0	0	0	0	0	0	0	0	0	0	0	0	0	0	0	0	0	0	0	0	0	0	0	0	0	0	0	0	0	0	0	0	0	0	0	0	0	0	0	0	0
Solyc00g033870	0		0	0	0	0	0	0	0	0	0	0	0	0	0	0	0	0	0	0	0	0	0	0	0	0	0	0	0	0	0	0	0	0	0	0	0	0	0	0	0	0	0	0	0	0	0	0	0
Solyc00g033880	0.0766667		0	0	0	0	0	0	0	0	0	0	0	0	0	0	0	0	0	0	0	0	0	0	0	0	0	0	0	0	0	0	0	0	0	0	0	0	0	0	0	0	0	0	0	0	0	0	0
Solyc00g033890	0		0	0	0	0	0	0	0	0	0	0	0	0	0	0	0	0	0	0	0	0	0	0	0	0	0	0	0	0	0	0	0	0	0	0	0	0	0	0	0	0	0	0	0	0	0	0	0
Solyc00g033990	0		0	0	0	0	0	0	0	0	0	0	0	0	0	0	0	0	0	0	0	0	0	0	0	0	0	0	0	0	0	0	0	0	0	0	0	0	0	0	0	0	0	0	0	0	0	0	0
Solyc00g034000	0		0	0	0	0	0	0	0	0	0	0	0	0	0	0	0	0	0	0	0	0	0	0	0	0	0	0	0	0	0	0	0	0	0	0	0	0	0	0	0	0	0	0	0	0	0	0	0
Solyc00g034010	0.115		0	0	0	0	0	0	0	0	0	0	0	0	0	0	0	0	0	0	0	0	0.025	0	0	0	0	0	0	0	0	0	0	0	0	0	0	0	0	0	0	0	0	0	0	0	0	0	0
Solyc00g034810	0.045		0	0	0	0	0	0	0	0	0	0	0	0	0	0	0	0	0	0	0	0	0	0	0	0	0	0	0	0	0	0	0	0	0	0	0	0.0275	0	0	0	0	0	0	0	0	0	0	0
Solyc00g035010	0.0175		0	0	0	0	0	0	0	0	0	0	0	0	0	0	0	0	0	0	0	0	0	0	0	0	0	0	0	0	0	0	0	0	0	0	0	0	0	0	0	0	0	0	0	0	0	0	0
Solyc00g035020	0.2025		0	0	0	0	0	0	0	0	0	0	0	0.0225	0	0	0	0	0	0	0	0	0	0	0	0	0	0	0	0.02	0	0	0	0	0	0	0	0	0	0	0	0	0	0	0	0	0	0	0
Solyc00g036320	8.63333	Expressed	0	0.02	0.025	0.0675771	0.0900347	0.0232737	0.0886002	0.0966523	0.0342479	0.0626332	0.1075	0.0518009	0.037081	0.0291548	0	0.03	0	0.123693	0.0475	0.0478714	0.0275	0	0	0.07	0	0	0.0451617	0.023094	0.0340343	0.0472582	0.03	0.0125	0	0	0.138346	0.126647	0.0644205	0.0262996	0	0	0	0	0	0	0	0	0
Solyc00g036520	1.655	Expressed	0	0.04	0.0242813	0.0288675	0.0375278	0	0.0325	0.03	0.0225	0	0.0275	0	0.0225	0	0.0225	0.0474342	0	0.0335099	0.0253311	0.0275	0.0525	0.03	0.035	0	0.035	0.0244949	0.0278014	0.0225	0.0375	0.0303795	0.0168325	0.0826009	0.03	0	0.0335099	0	0	0.0246221	0.025	0.02	0.0320156	0.0275	0.0483692	0.0609645	0.0366003	0.02529	0.0313581
Solyc00g036530	1.115	Expressed	0	0.0325	0	0.0275	0	0.0225	0	0	0	0.0325	0	0	0	0.0225	0.0309233	0.03	0	0.0319831	0.025	0	0	0	0	0.0325	0	0	0	0.0613052	0	0.025	0.0225	0	0.0866667	0	0.035	0	0	0	0.025	0.0275	0.0275	0	0.0303795	0	0.0325	0	0.0367423
Solyc00g036540	3.2075	Expressed	0	0.136038	0.149025	0.166652	0.0337577	0.0430842	0.0583809	0.0348807	0.0291548	0	0.0754983	0.0900347	0.0629153	0.0453459	0.0529741	0.0606046	0	0.26385	0.411481	0.146934	0.0471478	0.0574456	0.057373	0.0325	0.0355903	0	0.02	0.0246221	0.02	0.0425	0.0225	0.042106	0	0	0.191719	0.186788	0.0785679	0	0.216891	0	0.03	0.113017	0.0510514	0.0540062	0.07	0.0883648	0.0375
Solyc00g036740	0.0325		0	0	0	0	0	0	0	0	0	0	0	0	0	0	0	0	0	0	0	0	0	0	0	0	0	0	0	0	0	0	0	0	0	0	0	0	0	0	0	0	0	0	0	0	0	0	0
Solyc00g036750	0		0	0	0	0	0	0	0	0	0	0	0	0	0	0	0	0	0	0	0	0	0	0	0	0	0	0	0	0	0	0	0	0	0	0	0	0	0	0	0	0	0	0	0	0	0	0	0
Solyc00g036760	0.173333		0	0	0	0	0	0	0	0	0	0	0	0	0	0	0	0	0	0	0	0	0	0	0	0	0	0	0	0	0	0	0	0	0.173333	0	0	0	0	0	0	0	0	0	0	0	0	0	0
Solyc00g036960	1.01	Expressed	0	0.0225	0	0	0	0	0	0	0	0	0	0	0	0	0	0	0	0.0275	0.0337577	0.0275	0	0	0	0	0	0	0	0	0	0	0	0	0	0	0.0956556	0.065	0.0325	0	0	0.02	0	0	0	0	0	0	0.025
Solyc00g038390	0.035		0	0	0	0	0	0	0	0	0	0	0	0	0	0	0	0	0	0	0	0	0	0	0	0	0	0	0	0	0	0	0	0	0	0	0	0	0	0	0	0	0	0	0	0	0.0275	0	0
Solyc00g039290	1.03	Expressed	0	0	0	0	0	0	0	0	0	0	0	0	0	0	0	0	0	0.0188746	0	0	0	0	0	0	0	0	0	0	0	0	0	0	0	0	0.025	0.0332603	0	0	0	0	0	0	0	0	0	0	0
Solyc00g039990	11.7167	Expressed	0.526909	0.283237	0.389797	0.553404	0.522127	0.369211	0.261103	0.72535	0.142734	0.211246	0.415299	0.584014	0.401186	0.13626	0.256141	0.275892	0.837483	0.551226	0.674517	0.391695	0.499016	0.255257	0.349079	0.387371	0.574998	0.151107	0.321209	0.510512	0.282175	0.398466	0.654268	0.770633	1.07821	0.140475	0.120373	0.389069	0.171148	0.212014	0.547913	0.428649	0.32492	0.317595	0.448079	0.139246	0.765184	0.216502	0.316689
Solyc00g040290	0.055		0	0	0	0	0	0	0	0	0	0	0	0	0	0	0	0	0	0	0	0	0	0	0	0	0	0	0	0	0	0	0	0	0	0	0	0	0	0	0	0	0	0	0	0	0	0	0
Solyc00g040390	0.03		0	0	0	0	0	0	0	0	0	0	0	0	0	0	0	0	0	0	0	0	0	0	0	0	0	0	0	0	0	0	0	0	0	0	0	0	0	0	0	0	0	0	0	0	0	0	0
Solyc00g040490	0.04		0	0	0	0	0	0	0	0	0	0	0	0	0	0	0	0	0	0.0275	0	0	0	0	0	0	0	0	0	0	0	0	0	0	0	0	0	0	0	0	0	0	0	0	0	0	0	0	0
Solyc00g041090	0.4225		0	0	0	0	0	0	0	0	0	0	0	0	0	0	0	0	0	0	0	0	0.0325	0.03	0	0	0	0	0	0	0	0	0	0	0	0	0	0	0.0325	0	0	0	0	0.03	0	0	0	0.025	0
Solyc00g041190	0		0	0	0	0	0	0	0	0	0	0	0	0	0	0	0	0	0	0	0	0	0	0	0	0	0	0	0	0	0	0	0	0	0	0	0	0	0	0	0	0	0	0	0	0	0	0	0
Solyc00g041200	0		0	0	0	0	0	0	0	0	0	0	0	0	0	0	0	0	0	0	0	0	0	0	0	0	0	0	0	0	0	0	0	0	0	0	0	0	0	0	0	0	0	0	0	0	0	0	0
Solyc00g041210	0		0	0	0	0	0	0	0	0	0	0	0	0	0	0	0	0	0	0	0	0	0	0	0	0	0	0	0	0	0	0	0	0	0	0	0	0	0	0	0	0	0	0	0	0	0	0	0
Solyc00g041220	0		0	0	0	0	0	0	0	0	0	0	0	0	0	0	0	0	0	0	0	0	0	0	0	0	0	0	0	0	0	0	0	0	0	0	0	0	0	0	0	0	0	0	0	0	0	0	0
Solyc00g042120	0.13		0	0	0.0275	0.0225	0.0325	0.0325	0.0487126	0.0275	0.0525	0	0	0.041508	0.045	0.035	0	0.0575	0	0	0	0.025	0.025	0.03	0	0.0337577	0.035	0	0	0	0	0.0801561	0.0225	0	0	0	0	0	0	0.02	0	0	0.0275	0.0303795	0.025	0.0246221	0	0.0275	0.0375
Solyc00g042130	0		0	0	0	0	0	0	0	0	0	0	0	0	0	0	0	0	0	0	0	0	0	0	0	0	0	0	0	0	0	0	0	0	0	0	0	0	0	0	0	0	0	0	0	0	0	0	0
Solyc00g042140	0		0	0	0	0	0	0	0	0	0	0	0	0	0	0	0	0	0	0	0	0	0	0	0	0	0	0	0	0	0	0	0	0	0	0	0	0	0	0	0	0	0	0	0	0	0	0	0
Solyc00g042640	0.245		0	0.037081	0.035678	0.0500625	0.0813813	0	0.0765261	0.0575	0.0317543	0	0.045	0	0	0.0678694	0.0225	0.0225	0	0.0347611	0.0972433	0.0517204	0.0325	0.0920598	0.0615596	0.115072	0.035	0.0525	0.0325	0.0246221	0	0.03	0	0.0125	0	0	0.0425	0.0453459	0.115253	0.0480234	0.0303795	0.02	0	0.0303795	0.025	0.0225	0	0	0
Solyc00g042840	3.09333	Expressed	1.14993	0.162756	0.0995825	0.185787	0.134691	0.157975	0.163018	0.114637	0.411613	0.426175	0.312287	0.202911	0.171337	0.0583631	0.0800521	0.0422295	1.43057	0.146799	0.156924	0.389551	0.0476751	0.0278014	0.173799	0.19276	0.14032	0.0270801	0.0370529	0.0238048	0.0343996	0.0518813	0.0275	0.0239357	0.196554	0.0841295	0.207861	0.316254	0.250633	0.134931	0.088353	0.132877	0.0959492	0.0803119	0.0735272	0.205791	0.061441	0.0588784	0.064727
Solyc00g042850	0.085		0	0.0225	0.025	0.0291548	0	0.0325	0	0.0332603	0.0275	0.0325	0.034641	0.0275	0	0.0225	0	0.065	0	0.0327872	0.0325	0	0	0	0.03	0.025	0	0.015	0.025	0	0.0275	0	0.055	0	0	0	0.035	0.0531507	0	0.0425	0	0	0.0225	0.0320156	0	0	0	0.0175	0.0175
Solyc00g044350	9.1775	Expressed	0.627065	0.465105	0.240642	0.25421	0.201799	0.0672062	0.164545	0.116082	0.108886	0.0357071	0.0872735	0.0737535	0.0606218	0.0638357	0.0775	0	1.13863	0.515008	0.265785	0.140971	0.161006	0.18701	0.0542371	0.138947	0.116369	0.0332916	0.0580768	0.0209662	0	0	0	0	0.0409607	0.508342	0.609978	0.480804	0.0843603	0.0941962	0.221185	0.149409	0	0	0.0489898	0.0425	0	0	0
Solyc00g044550	0.716667		0	0	0	0	0.0275	0.0325	0.0225	0	0	0.065	0	0	0.0225	0	0.03	0.0225	0	0.0246221	0	0	0.0225	0.03	0	0	0.035	0	0	0.02	0	0	0	0	0	0.0666667	0.025	0	0	0	0.0303795	0.065	0	0.025	0	0	0.0342479	0	0.0225
Solyc00g044750	36.71	Expressed	0.123333	0.02	0.03	0.0275	0.0308221	0.0545245	0.0931397	0.0348807	0.0275	0.0725	0.120234	0.0548483	0.045	0.0225	0.0225	0.108963	0	0.1575	0.108359	0.152233	0.0442295	0.034641	0	0.0579511	0.00946485	0.0244949	0.0802081	0.0444175	0.0533073	0.07565	0.0442295	0.0426956	0	0	0.137174	0.540347	0.194551	0.0627827	0.045	0.0225	0.1325	0.057373	0.0500625	0.0707549	0.0576447	0.0777817	0.0434693
Solyc00g045570	67.73	Expressed	0	0.313059	0.111906	0.0755397	0.0600694	0.0259808	0.035	0.0302765	0.0275	0.0592136	0.0377492	0.602509	0.590713	0.880458	0.856003	1.71784	0.0333333	0.157341	0.225365	0.0470815	0.0430116	0.0575	0.03	0.03	0.042106	0.173061	0.13376	1.52827	1.93913	1.19836	1.84418	2.32175	0	0.0366667	0.0131498	0.0284312	0	0	0.05	0	0.615174	2.82938	0.384087	2.79531	7.58771	3.83909	3.36874
Solyc00g046570	0.85		0.0633333	0.0325	0	0	0	0	0	0	0	0	0.0275	0	0	0	0	0.03	0	0	0.0275	0	0.0275	0	0	0	0	0	0	0.02	0	0	0	0	0	0	0.0660177	0.0275	0	0	0	0	0	0.0325	0	0.02	0	0	0
Solyc00g046580	1.24	Expressed	0	0	0	0	0.0375278	0	0	0	0	0	0	0	0	0.0225	0	0	0	0	0.0275	0.05	0.0275	0.0596343	0.035	0	0.035	0	0	0.02	0	0	0	0	0	0	0.0597216	0.0291548	0	0	0	0	0	0.0275	0	0	0	0	0
Solyc00g046980	0.045		0	0	0	0	0	0	0	0	0	0	0	0	0	0	0	0	0	0	0	0	0	0	0	0	0	0	0.0262996	0	0	0	0	0	0	0	0	0	0	0	0	0	0	0	0	0	0	0	0
Solyc00g047180	1.2475	Expressed	0	0.0327872	0	0.0225	0.0325	0	0	0	0	0	0	0.0259808	0	0.0275	0	0.0275	0.03	0.0757188	0	0	0.025	0	0	0.025	0	0.015	0.035	0	0	0.025	0.0275	0.0225	0	0	0	0	0	0	0	0	0.0291548	0.0303795	0.0513971	0.0327872	0.0322749	0	0.0621825
Solyc00g047190	1.1475	Expressed	0	0	0.025	0	0	0	0	0	0	0	0	0	0	0	0	0	0	0.0225	0.0325	0	0.0275	0	0	0	0	0	0.02	0	0	0	0	0	0.03	0	0	0	0	0.02	0.0725	0	0	0	0.0668954	0	0.110905	0.0272336	0.0375
Solyc00g047200	6.54	Expressed	0.206667	0.226145	0.121749	0.158186	0.046793	0.0341565	0.0689202	0.0710047	0.055584	0.0721688	0.03	0.0025	0.0561805	0.106301	0.0543714	0.0502286	0	0.323445	0.0875	0.100861	0.156232	0.0978413	0.0874166	0.128671	0.042106	0.0354436	0.0521217	0.0822977	0.0867347	0.0413068	0.0273861	0.176186	2.73846	0.138924	0.0819934	0.116789	0.163146	0.0447912	0.0999166	0.0379693	0.0570636	0.113017	0.0698063	0.096036	0.047697	0.0889171	0.0946044
Solyc00g047700	378.863	Expressed	5.86152	20.4319	7.31353	4.92033	12.6192	3.47585	0.616203	2.14301	6.5386	5.2868	6.3674	3.01132	3.33208	4.17271	2.58348	2.52522	6.43317	24.0044	9.42193	9.52811	4.27527	8.12475	2.75537	8.17134	15.3646	12.8756	14.929	4.67307	5.81151	4.09377	9.29435	8.4805	3.83367	3.57891	4.23297	13.9044	4.41165	2.91682	1.63251	2.75726	2.50945	5.56957	3.20506	0.930309	3.16485	3.8578	2.70538
Solyc00g047810	0.3275		0	0.0246221	0	0.0442295	0	0.0425	0.0225	0.0332603	0.0317543	0.0975	0.0613052	0.0475	0.0430842	0.0618466	0.07565	0.0548483	0	0.0246221	0.0325	0.025	0.0275	0.034641	0.101602	0.0337577	0	0.0244949	0.035	0.0246221	0.0340343	0.02	0.0332603	0.035	0	0	0	0.0275	0.0375278	0.046793	0.0533073	0.0246221	0.0291548	0.0475	0.0625167	0.0425	0.080247	0	0.0619812
Solyc00g048410	1.3125	Expressed	0	0	0	0	0	0	0	0	0	0	0	0	0.03	0	0	0	0	0	0	0	0	0	0	0	0	0	0	0	0	0	0	0	0	0	0	0	0	0.02	0	0	0	0	0	0.0225	0.0325	0	0
Solyc00g048510	25.3925	Expressed	0.04	0.263455	0.196357	0.119094	0.0535996	0.183547	0.300233	0.169975	0.354659	0.247433	0.38896	0.61696	0.240936	0.126787	1.1997	0.330161	0.21	0.101653	0.291262	0.120994	0.115109	0.351577	0.567788	0.452962	0.523727	0.314229	0.46387	0.683734	0.295505	0.156018	0.278848	0.130408	0	0	0.162198	0.0583095	0.0635741	0.128258	0.0760893	0.0515388	0.133354	0.499339	0.160436	0.0404918	0.0342479	0.0714726	0.100042
Solyc00g049210	7.685	Expressed	0.03	0.289554	0.0935414	0.0819553	0.115578	0.106654	0.0900347	0.0611521	0.0878446	0.0829031	0.0984357	0.0507239	0.118638	0.0478496	0.0747635	0.248743	0	0.434482	0.119469	0.064727	0.0814964	0.0267706	0.101735	0.137075	0.0406202	0.0922858	0.0788855	0.0627661	0.177459	0.0723994	0.0753188	0.0635741	0.03	0.626667	0.0524404	0.133502	0.0865544	0.0209662	0.0889757	0.0402854	0.0523609	0.0179699	0.111131	0.0918785	0.117828	0.0394493	0.0729155
Solyc00g049220	1.4825	Expressed	0	0	0	0.025	0.0325	0	0	0	0	0	0	0	0.0225	0	0	0	0	0.0275	0	0	0	0.03	0	0	0.0325	0.025	0.0262996	0.02	0	0	0	0	0	0.13	0	0	0.0361421	0	0.0842986	0.0275	0	0.0325	0.105751	0	0	0	0
Solyc00g049520	99.295	Expressed	0.15857	0.753884	0.957053	3.78475	3.34432	5.31947	1.55504	5.27439	9.01502	10.5641	9.80844	4.53914	2.36139	1.60755	3.95764	5.09804	0.06	0.560556	1.14364	3.15025	4.20265	2.42332	4.08552	4.55348	2.39077	1.23072	2.36953	2.34896	3.05591	3.16251	0.680747	3.04856	0	0	0.581736	0.231391	0.559539	0.738663	0.35701	0.768418	0.0809707	0.16342	0.0690863	0.258114	0.133978	0.232916	0.161419
Solyc00g049620	0.2025		0	0	0	0	0	0	0	0	0	0	0	0	0	0	0	0	0	0	0	0.0275	0	0	0	0	0	0	0	0	0	0	0	0	0	0	0	0.0225	0	0	0	0	0	0	0	0	0	0	0
Solyc00g049920	0		0	0	0	0	0	0	0	0	0	0	0	0	0	0	0	0	0	0	0	0	0	0	0	0	0	0	0	0	0	0	0	0	0	0	0	0	0	0	0	0	0	0	0	0	0	0	0
Solyc00g050020	0		0	0	0	0	0	0	0	0	0	0	0	0	0	0	0	0	0	0	0	0	0	0	0	0	0	0	0	0	0	0	0	0	0	0	0	0	0	0	0	0	0	0	0	0	0	0	0
Solyc00g050030	0.1		0	0	0	0.025	0	0	0	0	0	0	0	0	0	0	0	0	0	0	0	0	0	0	0	0	0	0	0	0	0	0	0	0	0	0.1	0	0	0	0	0	0	0	0	0	0	0	0	0
Solyc00g050130	34.0925	Expressed	0.72148	0.535263	0.628987	0.484991	1.47416	0.764726	0.550954	0.405779	0.949342	0.696144	0.350247	0.226987	0.193778	0.121244	0.666975	0.380854	2.43296	0.793106	0.381499	1.22616	0.12439	0.449175	0.826815	1.08258	1.05445	0.831027	1.08044	0.298063	0.32509	0.189533	0.349535	0.279952	0.872168	0.280852	0.584171	0.424087	0.264807	0.776674	0.582015	0.38761	0.361072	0.334823	0.375788	0.304672	0.480651	0.146884	0.336065
Solyc00g050430	59.15	Expressed	4.1267	2.55605	1.61385	0.738595	0.137052	0.216679	0.131783	0.151932	0.417582	0.450821	0.162532	0.397052	0.190679	0.147083	0.0729583	0.0339116	2.66016	2.40825	0.750383	0.441142	0.297672	0.0780491	0.0790569	0.0712244	0.0853791	0.0411299	0.0636887	0.346708	0.186386	0.0522813	0.106409	0.0955685	0.424356	0.19936	0.792238	0.556198	0.266251	0.0341565	0.0790042	0.14623	0.025	0.025	0.0288675	0.0259808	0.035	0.075	0.025
Solyc00g052430	8.8525	Expressed	1.42998	0.194529	0.218837	0.195848	0.100995	0.0492231	0.0634429	0.0469929	0.113385	0.0643396	0.0872258	0.0537548	0.0792149	0.0507445	0.118392	0.107083	0	0.293382	0.0943729	0.0946925	0.191703	0.121312	0.0496655	0.0943729	0.0712244	0.0589491	0.115497	0.0868428	0.15278	0.0998645	0.129767	0.128712	0.268887	0.342264	0.100457	0.0790965	0.141244	0.114819	0.0759797	0.0889757	0.0833167	0.0904042	0.185803	0.176794	0.141326	0.118181	0.158922
Solyc00g052530	2.48	Expressed	0	0.0327872	0.025	0.0525	0.0600694	0.0430842	0	0.0548483	0.0275	0.0325	0.03	0.025	0.0225	0.0275	0.065192	0.136809	0	0.0498957	0.0589491	0.0526585	0.0442295	0.0325	0.0275	0	0.025	0.0320156	0.0294392	0.0368273	0	0.05	0.08	0.0155456	0.0808977	0.293333	0.02529	0.055	0	0.0225	0.0874047	0.0275	0.0410284	0.0337577	0.0946375	0.0347311	0.0615596	0.0466369	0.0440643
Solyc00g052540	1.89	Expressed	0.0633333	0	0	0	0.0325	0	0	0	0.0225	0.0325	0.0583095	0.025	0.0525	0.0301386	0.077352	0.0135401	0.0333333	0	0.0475	0.0275	0	0.03	0	0	0.035	0.03	0.0325	0.0546771	0.0575	0.12893	0.0675	0.0440407	0.054569	0	0	0.0275	0.0325	0.02	0.0320156	0	0.0225	0.025	0.0430842	0.064727	0.065	0.0272336	0.0262996
Solyc00g052940	2.95	Expressed	0.49085	0.0519615	0.035678	0	0	0.065	0.0325	0.0332603	0	0.0625	0.0631137	0	0.0225	0	0	0.0225	0.95062	0.0409013	0.0325	0.025	0	0.03	0.03	0.0337577	0	0	0.05058	0.0225	0	0	0	0.0125	0	0	0	0.0479583	0	0	0	0	0	0	0	0	0	0	0
Solyc00g053440	78.245	Expressed	0.04	0.833891	0.950417	0.549824	1.09728	5.57623	3.67976	0.648929	5.89356	2.88158	1.36856	5.45182	2.4846	3.56429	2.93236	2.5582	0.07	0.676306	0.41332	0.214413	0.473181	2.32699	2.23774	1.03207	2.48585	3.18117	2.46194	2.37194	1.3373	2.92399	2.87844	3.62557	0.0814453	0.0726483	0.548747	0.83257	0.658969	1.66139	3.86659	2.0252	2.86593	1.41442	2.13222	6.26466	1.22422	2.18436	3.11667
Solyc00g053740	0.0333333		0	0	0	0	0	0	0	0	0	0	0	0	0	0	0	0	0	0	0	0	0	0	0	0	0	0	0	0	0	0	0	0	0	0	0	0	0	0	0	0.0275	0.025	0	0	0	0	0	0
Solyc00g055940	0.105		0	0	0	0	0.025	0.03	0	0	0.0275	0	0.0225	0	0.03	0	0.0320156	0	0	0	0	0.0275	0	0	0.0348807	0	0	0	0	0.02	0	0.02	0.0291548	0.0125	0	0	0	0	0.0325	0.0409268	0.0684349	0.0325	0.0275	0.0325	0.0320156	0	0.0275	0.0225	0
Solyc00g055950	0		0	0	0	0	0	0	0	0	0	0	0	0	0	0	0	0	0	0	0	0	0	0	0	0	0	0	0	0	0	0	0	0	0	0	0	0	0	0	0	0	0	0	0	0	0	0	0
Solyc00g055960	0		0	0	0	0	0	0	0	0	0	0	0	0	0	0	0	0	0	0	0	0	0	0	0	0	0	0	0	0	0	0	0	0	0	0	0	0	0	0	0	0	0	0	0	0	0	0	0
Solyc00g055970	0		0	0	0	0	0	0	0	0	0	0	0	0	0	0	0	0	0	0	0	0	0	0	0	0	0	0	0	0	0	0	0	0	0	0	0	0	0	0	0	0	0	0	0	0	0	0	0
Solyc00g055980	0		0	0	0	0	0	0	0	0	0	0	0	0	0	0	0	0	0	0	0	0	0	0	0	0	0	0	0	0	0	0	0	0	0	0	0	0	0	0	0	0	0	0	0	0	0	0	0
Solyc00g056180	0		0	0	0	0	0	0	0	0	0	0	0	0	0	0	0	0	0	0	0	0	0	0	0	0	0	0	0	0	0	0	0	0	0	0	0	0	0	0	0	0	0	0	0	0	0	0	0
Solyc00g056680	14.15	Expressed	0.818318	0.247942	0.222598	0.203388	0.28114	0.266989	0.243071	0.190394	0.221077	0.195336	0.265593	0.0804544	0.236092	0.084951	0.26672	0.46243	1.67953	0.162551	0.279475	0.329959	0.1964	0.256466	0.152555	0.247466	0.3175	0.109886	0.0867347	0.354119	0.122304	0.202788	0.227537	0.553715	0.280377	0.188886	0.112278	0.136412	0.360093	0.0843603	0.262583	0.249433	0.301368	0.371954	0.242878	0.14643	0.152834	0.600505	0.319489
Solyc00g057280	0.493333		0	0	0	0	0	0	0	0	0	0	0	0	0	0	0	0	0	0	0	0	0	0	0	0	0	0	0	0	0	0	0	0	0	0	0.025	0	0	0	0	0	0	0	0	0	0	0	0
Solyc00g057880	7.3	Expressed	0.484504	0.155215	0.152117	0.267313	0.121955	0.0889757	0.190673	0.350868	0.587346	0.490518	0.510757	0.158975	0.322671	0.0930054	0.0931285	0.197416	0.0602771	0.224439	0.250699	0.183275	0.271001	0.36879	0.168937	0.211108	0.361813	0.305733	0.430629	0.152281	0.159635	0.34352	0.136221	0.0572094	0.174197	0.518148	0.275636	0.293967	0.138165	0.0889757	0.181171	0.130982	0.03	0.165555	0.0483692	0.111383	0.0438511	0.0711073	0.166302
Solyc00g058280	0.673333		0	0	0	0.068374	0.0462781	0.0505594	0.0886002	0.0525	0.0262599	0.0337577	0.0332603	0.0225	0.0259808	0.0291548	0	0.03	0	0	0	0.0259406	0.00853913	0.0309233	0.0455293	0.075	0.025	0.025	0.02	0.02	0.0325	0.025	0	0.025	0	0	0.025	0.0275	0	0.02	0	0	0.0225	0.116261	0.0275	0.02	0	0.02529	0.025
Solyc00g058480	0.3		0	0	0	0	0.0325	0.0225	0.0327872	0.0857321	0.0262599	0.0375278	0.113578	0	0.0225	0.06408	0	0.0283945	0	0	0	0	0.0225	0.0309233	0.0325	0.0327554	0.025	0.025	0.0262996	0.04	0.035	0.02	0.0275	0.0239357	0	0	0.0175	0	0	0.02	0.0225	0	0.025	0.0625	0	0	0.035	0.0175	0
Solyc00g058490	0.29		0.123333	0.0225	0.0320156	0.0410284	0.0308221	0	0	0.0325	0.0275	0.0375278	0	0.0225	0	0	0	0.03	0.1	0.0225	0.0581664	0.0506623	0	0	0.0325	0	0.025	0	0.0340343	0.04	0.035	0	0.0225	0.0125	0	0	0.0383786	0.0275	0.0325	0	0	0.045	0.0309233	0.0872735	0.0303795	0.0425	0.0275	0.0425	0
Solyc00g058890	10.18	Expressed	0.0833333	0	0.0288675	0	0	0	0	0.03	0	0	0	0	0	0	0	0	0	0.0325	0	0.025	0.0325	0	0	0	0	0.025	0.0675	0	0	0	0	0	0	0	0.035	0.0225	0.0325	0.02	0	0	0	0.0332603	0.0275	0	0.0325	0	0.0175
Solyc00g058900	1.3125	Expressed	0	0	0	0	0	0	0	0	0	0	0	0	0	0	0	0	0	0	0	0	0	0.03	0	0	0	0	0	0	0	0	0	0	0	0	0	0	0	0	0	0.0275	0.0275	0	0	0.0246221	0	0.0175	0.0246221
Solyc00g059100	39.4367	Expressed	2.76934	0.527089	0.615454	0.359282	0.235315	0.215986	0.516503	0.308879	0.585548	0.391674	0.349106	0.534343	0.266536	0.692158	0.326458	0.16335	12.3306	0.143236	0.577298	0.671373	0.344949	0.382892	0.47457	0.444998	0.280695	0.495732	0.283813	0.307151	0.598115	0.236414	0.197289	0.301921	16.2219	0.961879	0.37932	0.60798	0.681302	0.180485	0.299037	0.301036	0.151843	0.245709	0.360486	0.264984	0.311057	0.117118	0.0708725
Solyc00g059500	12.88	Expressed	0	0.842658	0.462139	0.333479	0.632474	0.739486	0.535885	0.819985	0.295138	0.732887	0.417183	0.590184	0.423544	0.371312	0.993756	0.112138	0.07	0.552289	0.53877	1.15777	0.345431	0.644494	0.574375	1.10263	0.211759	0.853742	0.574781	0.295409	0.629874	0.575739	0.737592	0.617608	0	0	0.922048	0.991971	0.689994	0.34762	0.282352	0.724481	0.243939	0.471001	0.444998	0.941935	0.939282	0.368092	0.650453
Solyc00g060700	0		0	0	0	0	0	0	0	0	0	0	0	0	0	0	0	0	0	0	0	0	0	0	0	0	0	0	0	0	0	0	0	0	0	0	0	0	0	0	0	0	0	0	0	0	0	0	0
Solyc00g060710	0		0	0	0	0	0	0	0	0	0	0	0	0	0	0	0	0	0	0	0	0	0	0	0	0	0	0	0	0	0	0	0	0	0	0	0	0	0	0	0	0	0	0	0	0	0	0	0
Solyc00g060810	5098.67	Expressed	0	0.0534439	0	0.0609645	0.0290115	0.0924099	0.0992786	0	2.75664	3.09778	0.337775	6.9524	12.4095	8.89126	11.3094	18.1068	0	0	0	0.190629	0.391884	1.47004	0.788378	0.226435	14.0511	28.4163	5.39882	21.8046	16.0103	10.3937	33.1555	48.6608	0	0	0	0.0951643	0.06408	1.54571	5.77575	1.38093	553.507	488.329	301.889	94.0485	179.088	110.886	287.16
Solyc00g062710	0		0	0	0	0	0	0	0	0	0	0	0	0	0	0	0	0	0	0	0	0	0	0	0	0	0	0	0	0	0	0	0	0	0	0	0	0	0	0	0	0	0	0	0	0	0	0	0
Solyc00g063110	0.025		0	0	0	0	0	0	0	0	0	0	0	0	0	0	0.0225	0	0	0	0	0	0	0	0	0	0	0	0	0	0	0	0	0	0	0	0	0	0	0	0	0	0	0	0	0	0	0	0
Solyc00g063510	0.105		0	0	0	0	0	0	0	0	0	0	0	0	0	0	0	0	0	0	0	0.055	0	0	0	0	0	0	0	0	0	0	0	0	0	0	0	0	0	0	0	0	0	0	0	0.0225	0	0	0
Solyc00g065510	0.4375		0	0.0225	0.025	0.045	0.0477842	0.0380789	0.0569173	0	0.0551513	0.0375278	0.0375	0.068374	0	0.0347311	0.0225	0.0430842	0	0.0225	0.0462781	0.0324037	0.0325	0.0259406	0.0275	0.0545245	0.05058	0.025	0.0337577	0.023094	0.0614241	0.102744	0.0515388	0.0175594	0.0233333	0	0.02529	0.0779423	0.0622328	0.0464354	0.0295804	0.0280995	0.0309233	0	0.0483692	0.0425	0.0919579	0.0375	0.071807
Solyc00g065610	0.0425		0	0	0	0	0	0	0	0	0	0	0	0	0	0	0	0	0	0	0	0	0	0	0	0	0	0	0	0	0	0	0	0	0	0	0	0	0	0	0	0	0	0	0	0	0	0	0
Solyc00g065620	0		0	0	0	0	0	0	0	0	0	0	0	0	0	0	0	0	0	0	0	0	0	0	0	0	0	0	0	0	0	0	0	0	0	0	0	0	0	0	0	0	0	0	0	0	0	0	0
Solyc00g065630	0		0	0	0	0	0	0	0	0	0	0	0	0	0	0	0	0	0	0	0	0	0	0	0	0	0	0	0	0	0	0	0	0	0	0	0	0	0	0	0	0	0	0	0	0	0	0	0
Solyc00g065930	0.03		0	0	0.0225	0	0	0	0	0.03	0	0	0	0	0	0	0	0	0	0	0	0	0	0	0	0	0	0	0	0	0	0	0	0	0	0	0	0	0	0	0	0	0	0	0	0	0	0	0
Solyc00g065940	0		0	0	0	0	0	0	0	0	0	0	0	0	0	0	0	0	0	0	0	0	0	0	0	0	0	0	0	0	0	0	0	0	0	0	0	0	0	0	0	0	0	0	0	0	0	0	0
Solyc00g066140	0		0	0	0	0	0	0	0	0	0	0	0	0	0	0	0	0	0	0	0	0	0	0	0	0	0	0	0	0	0	0	0	0	0	0	0	0	0	0	0	0	0	0	0	0	0	0	0
Solyc00g066150	0		0	0	0	0	0	0	0	0	0	0	0	0	0	0	0	0	0	0	0	0	0	0	0	0	0	0	0	0	0	0	0	0	0	0	0	0	0	0	0	0	0	0	0	0	0	0	0
Solyc00g066350	0.45		0	0	0	0	0	0	0	0	0	0	0	0	0	0	0	0	0	0.0325	0	0	0	0	0	0	0.0325	0	0	0.02	0.065	0	0	0	0.03	0	0.0515388	0.0225	0.03	0	0.025	0	0	0.0625	0	0	0.0366003	0.0175	0
Solyc00g066360	0.4825		0	0	0	0	0	0	0	0	0	0	0	0	0	0	0	0	0	0.0325	0	0	0	0	0.0325	0	0.0325	0	0	0	0.065	0	0	0	0.03	0	0.0428904	0.0225	0.03	0	0.025	0	0	0	0	0	0.0366003	0	0
Solyc00g066370	0		0	0	0	0	0	0	0	0	0	0	0	0	0	0	0	0	0	0	0	0	0	0	0	0	0	0	0	0	0	0	0	0	0	0	0	0	0	0	0	0	0	0	0	0	0	0	0
Solyc00g067470	2.45333	Expressed	1.11332	0.258501	0.118814	0.162224	0.0913327	0.0661438	0.107189	0.0201556	0.0638357	0.0308221	0.0925	0.0225	0.0259808	0.0275	0.0309233	0	0.197428	0.159863	0.176399	0.0910128	0.215382	0.0579332	0.0261406	0.100208	0.035	0.0525	0.11726	0.0246221	0.02	0.0623665	0.08	0.025	0.0608276	0.143333	0.0495606	0.076635	0.0600694	0.066458	0	0.0246221	0.0225	0.0303795	0.0270801	0.0246221	0	0.0175	0
Solyc00g068970	2.12667	Expressed	0.0360555	0	0	0	0	0	0	0	0	0	0	0	0	0	0	0	0	0	0	0	0	0	0	0	0	0	0	0	0	0	0	0	0.0566667	0	0	0	0	0	0	0	0	0	0	0	0.035	0	0
Solyc00g068980	3.4675	Expressed	0	0.0327872	0.0425	0.0275	0	0	0	0	0	0	0.045	0	0	0	0	0	0	0.0615596	0	0	0	0	0.035	0	0	0	0	0	0	0	0	0	0	0.0392994	0.143607	0.0520216	0	0	0	0	0	0.025	0	0	0.0325	0	0.02
Solyc00g069680	0.025		0	0	0	0	0	0	0	0	0	0	0	0	0	0	0	0	0	0	0	0	0	0	0	0	0	0	0	0	0	0	0	0	0	0	0	0	0	0	0	0	0	0	0	0	0	0	0
Solyc00g069880	4.7725	Expressed	0	0.124457	0	0.00629153	0.0558271	0.0520216	0.0858778	0.0517204	0.0874643	0.0609645	0.0596343	0.0242813	0.0703562	0.0570088	0.045	0.0726292	0.03	0.150582	0.0290115	0.0303795	0.0286865	0.034641	0.055	0.0545245	0.0325	0.0287228	0.0694472	0.0402078	0.083504	0.0339116	0.0925	0.0653676	0	0	0.0471699	0.0332603	0.0375278	0.0262996	0.142442	0.0325	0.066128	0.0897566	0.170947	0.0425	0.120303	0.0754293	0.0991106
Solyc00g070680	0.4675		0	0	0	0.025	0	0	0	0	0	0	0	0	0	0	0	0	0	0	0	0	0	0	0	0	0	0	0	0	0	0	0	0	0	0	0.045	0	0	0	0	0	0	0	0	0	0	0	0
Solyc00g071180	64.5967	Expressed	0.193333	0.685924	0.025	0.05	0.0535996	0	0	0	0.0575	0	0.0309233	0.462986	0	0	0	0	0.60136	0.311355	0.552049	0	0.257629	0	0	0.0320156	0.035	0	0	0	0	0.0275	0	0	0.625842	0	0.906739	0.126186	0.065	0	0.0510514	0.0495606	0	0.0275	0.0320156	0	0	0	0
Solyc00g071580	0.0325		0	0	0.025	0	0	0	0	0	0	0	0	0	0	0	0	0	0	0	0	0	0	0	0	0	0	0	0	0	0	0	0	0	0	0	0	0	0	0	0	0	0	0	0	0	0	0	0
Solyc00g071590	0		0	0	0	0	0	0	0	0	0	0	0	0	0	0	0	0	0	0	0	0	0	0	0	0	0	0	0	0	0	0	0	0	0	0	0	0	0	0	0	0	0	0	0	0	0	0	0
Solyc00g071600	0		0	0	0	0	0	0	0	0	0	0	0	0	0	0	0	0	0	0	0	0	0	0	0	0	0	0	0	0	0	0	0	0	0	0	0	0	0	0	0	0	0	0	0	0	0	0	0
Solyc00g072100	889.327	Expressed	18.0395	1.412	1.85409	0.567817	0.129253	0.944603	2.12575	1.76943	3.36978	1.1108	2.59213	1.08293	1.94716	1.35477	0.724009	0.733922	24.6261	1.81672	1.67657	0.656734	1.53813	2.98777	0.988054	2.37658	2.91133	4.08424	3.93403	0.689062	0.823118	1.01084	0.602792	1.17433	5.41023	15.6251	0.87416	0.391288	0.795837	0.887472	2.13139	0.783681	0.196384	0.527484	0.647642	0.35096	0.34702	0.231607	0.28688
Solyc00g072400	0.0633333		0	0	0	0	0	0	0	0	0	0	0	0.0225	0	0	0	0	0	0	0.0275	0	0	0	0	0	0	0.025	0	0	0	0	0	0	0	0	0	0	0.03	0	0.05	0	0	0	0	0	0	0	0
Solyc00g072800	8.175	Expressed	0.133708	0.0636396	0.0363719	0.0612372	0.0625	0	0.0325	0.0325	0.0275	0.0337577	0.0566238	0.0025	0.015	0.0273861	0	0.0777817	0.0817177	0.0785281	0.0426956	0.0409013	0.065	0.03	0	0.03	0.035	0.015	0	0.04	0.0352373	0.03	0.0262599	0.0298608	0.562564	0.0484195	0.0522813	0.0442295	0	0.0246221	0.1225	0.0613052	0.0275	0.0513971	0.153643	0.0272336	0.0449768	0	0.127312
Solyc00g073200	0.0275		0	0	0	0	0	0	0	0	0	0	0	0	0	0	0	0	0	0	0	0	0	0	0	0	0	0	0	0	0	0	0	0	0	0	0	0	0	0	0	0	0	0	0	0	0	0	0
Solyc00g073900	0		0	0	0	0	0	0	0	0	0	0	0	0	0	0	0	0	0	0	0	0	0	0	0	0	0	0	0	0	0	0	0	0	0	0	0	0	0	0	0	0	0	0	0	0	0	0	0
Solyc00g073910	0		0	0	0	0	0	0	0	0	0	0	0	0	0	0	0	0	0	0	0	0	0	0	0	0	0	0	0	0	0	0	0	0	0	0	0	0	0	0	0	0	0	0	0	0	0	0	0
Solyc00g074210	0.4725		0	0	0	0.025	0	0.03	0	0	0	0.025	0.0332603	0.0275	0.0520216	0.0275	0.025	0.12	0	0	0	0	0	0	0	0	0.035	0	0	0	0	0	0	0.065	0	0	0	0.0225	0	0.0225	0.025	0	0	0.0265754	0	0	0	0	0
Solyc00g074810	0.025		0	0	0	0	0	0	0	0	0	0	0	0	0	0	0	0	0	0	0	0	0	0	0	0	0	0	0	0	0	0	0	0	0	0	0	0	0	0	0	0	0	0	0	0	0	0	0
Solyc00g074820	0		0	0	0	0	0	0	0	0	0	0	0	0	0	0	0	0	0	0	0	0	0	0	0	0	0	0	0	0	0	0	0	0	0	0	0	0	0	0	0	0	0	0	0	0	0	0	0
Solyc00g074830	0		0	0	0	0	0	0	0	0	0	0	0	0	0	0	0	0	0	0	0	0	0	0	0	0	0	0	0	0	0	0	0	0	0	0	0	0	0	0	0	0	0	0	0	0	0	0	0
Solyc00g075030	0.59		0	0	0	0	0	0	0	0	0	0	0	0	0	0	0	0	0	0	0	0	0	0	0	0	0	0	0	0	0	0	0	0	0.03	0	0	0	0	0	0	0.0275	0	0	0	0	0	0.025	0
Solyc00g075040	0.335		0	0	0	0	0.0325	0	0	0	0	0	0	0	0	0	0	0	0	0	0	0	0	0	0	0	0	0	0	0	0	0	0	0	0	0	0	0	0	0	0	0.0275	0	0	0	0	0.0325	0	0
Solyc00g075440	2.94	Expressed	0	0.102754	0.137924	0.0225	0	0	0	0	0	0	0	0	0	0	0	0	0	0.0335099	0.314563	0.025	0.0275	0.03	0	0	0	0	0	0	0	0	0	0	0	0	0.0426956	0.0317543	0.0325	0.0262996	0.0225	0	0	0	0	0	0	0	0
Solyc00g075450	4.2625	Expressed	0	0.0327872	0.0749444	0.0275	0.0668954	0.0259808	0.0505594	0.0302765	0.0801431	0.0625	0.045	0.0225	0	0	0.0275	0.0225	0	0.0630476	0.183802	0.0704746	0.0638357	0.142829	0.0627163	0.025	0.0325	0.0287228	0.0606046	0	0.065	0	0	0.0125	0	0.0433333	0.792496	0.0708725	0.0394493	0	0.0147196	0.0334166	0.025	0.0590727	0.03	0.02	0.0275	0.0225	0
Solyc00g076250	0.1325		0	0	0.0225	0	0	0	0	0	0	0	0	0	0	0	0	0	0	0	0	0.0275	0	0	0	0	0	0	0	0	0	0	0	0	0	0.0666667	0	0	0	0	0	0	0	0	0.0275	0	0	0	0
Solyc00g079050	0.025		0	0	0	0	0	0	0	0	0	0	0	0	0	0	0	0	0	0	0	0	0	0	0	0	0	0	0	0	0	0	0	0	0	0	0	0	0	0	0	0	0	0	0	0	0	0	0
Solyc00g080550	0.045		0	0	0	0	0	0	0	0	0	0	0	0	0	0	0	0	0	0	0	0	0	0	0	0	0	0	0	0	0	0	0	0	0	0	0	0	0	0	0	0	0	0	0	0	0	0	0
Solyc00g080750	12.06	Expressed	0.726246	0.141855	0.317684	0.111692	0	0.0295804	0.0327872	0.0317543	0.0317543	0.025	0.0939858	0.0259808	0	0	0	0	0.263333	0.112648	0.0491596	0.0275	0.025	0.03	0	0.03	0	0	0	0	0	0	0	0.035	0.0566667	0	0.05	0.0494975	0.0325	0.0349702	0.0375	0.0275	0	0.0625	0.0275	0.02	0.0348807	0	0
Solyc00g082150	116.192	Expressed	7.64191	3.6771	2.98272	1.99719	2.47569	1.22442	2.60955	2.748	2.61772	3.73171	0.805662	2.63784	3.27287	0.953633	2.58667	1.65261	2.70484	5.97292	1.9202	1.75969	2.52529	4.79406	2.55585	6.07921	6.889	6.744	4.20046	1.86724	2.78494	1.72201	3.07198	3.05075	2.55273	2.2336	4.15303	3.81824	3.53584	4.17091	5.84116	7.16431	0.651925	1.85412	0.919533	1.84681	2.14491	0.966776	2.17026
Solyc00g082550	0.2		0.03	0	0.0225	0	0	0	0	0	0	0	0	0	0	0	0	0	0	0	0	0	0	0	0	0	0	0	0	0	0	0	0	0	0.2	0	0	0	0	0	0	0	0	0	0	0	0	0	0
Solyc00g084650	0.06		0	0	0	0	0	0	0	0	0	0	0	0	0	0	0	0	0	0	0	0	0	0	0	0	0	0	0	0	0	0	0	0	0	0	0	0	0	0	0	0	0	0	0	0	0	0	0
Solyc00g084750	1.1675	Expressed	0.04	0.0569173	0.0710047	0.144453	0.174619	0.0512144	0.0585057	0.0301386	0.130064	0.0483908	0.0859263	0.0543714	0.161626	0.189137	0.181957	0.0387298	0	0.0494975	0.0801041	0.0914125	0.077352	0.0980221	0.134559	0.123584	0.149136	0.0877852	0.165397	0.0830161	0.0779423	0.0513769	0.0722265	0.096296	0	0	0.0956883	0.21418	0.132563	0.103793	0.133065	0.0654472	0.0986999	0.20079	0.0841997	0.0949013	0.074652	0.0507445	0.132822
Solyc00g084760	2.99333	Expressed	2.12465	0.0712244	0.0558271	0.132374	0.0863496	0.115425	0.232965	0.179954	0.167749	0.154326	0.062849	0.0920484	0.161374	0.184498	0.0628987	0.109877	0.449085	0.115289	0.0618297	0.248613	0.0335099	0.0953502	0.124766	0.0666302	0.0696868	0.0940744	0.138834	0.12339	0.122907	0.140438	0.145852	0.0810735	2.77931	0	0.121381	0.0531311	0.0531311	0.0654472	0.0711805	0.179304	0.0611692	0.0853424	0.103712	0.153433	0.035	0.0872735	0.0630476
Solyc00g084770	3.14333	Expressed	0.569571	0.129896	0.0866386	0.0170783	0.164437	0.122882	0.202377	0.188282	0.192889	0.284459	0.14586	0.0733002	0.175926	0.0792675	0.280219	0.075111	1.74671	0.0625833	0.0455522	0.134187	0.122577	0.20609	0.0715746	0.0895707	0.194481	0.0818917	0.113091	0.119513	0.29076	0.168344	0.15237	0.159915	0.0272845	0.0366667	0.0736546	0.0533073	0.107732	0.132059	0.0957862	0.0932291	0.0615088	0.0817899	0.0796346	0.115362	0.110943	0.0781425	0.122406
Solyc00g084870	4	Expressed	0.133167	0.145402	0.0749444	0.129936	0.0375278	0.0430842	0.0398696	0.08	0.0442295	0.0833042	0.0409013	0.0259808	0.0309233	0.0291548	0.045	0.0469707	0.165227	0.258102	0.071923	0.0730725	0.0379693	0.0558271	0.0322749	0	0.0606046	0	0	0	0	0	0.0275	0	0.204315	0.304266	0.0512144	0.0575905	0.115253	0.0815858	0.0982662	0.0495606	0.03	0.025	0	0.0225	0.035	0	0.02
Solyc00g085070	162.587	Expressed	4.28257	9.5316	3.39293	1.1995	3.09938	2.79346	1.05917	1.7978	3.26683	2.82102	2.34054	1.3115	5.47053	1.45806	1.5998	1.72688	37.901	6.7108	3.71622	6.7672	1.15581	3.57824	2.69421	2.37175	4.4963	2.27937	2.68564	3.62256	2.66561	1.19521	1.85007	3.40323	27.8941	2.48718	4.20973	2.38825	1.29237	1.40975	2.70786	1.55657	2.57172	2.22606	1.44593	4.03225	3.57043	3.44511	1.40534
Solyc00g085370	0.11		0	0	0	0	0	0	0	0	0	0	0	0	0	0	0	0	0	0	0	0	0	0	0	0	0	0	0	0.0225	0	0	0	0	0	0	0	0	0	0	0	0	0	0	0	0	0	0	0
Solyc00g085770	0		0	0	0	0	0	0	0	0	0	0	0	0	0	0	0	0	0	0	0	0	0	0	0	0	0	0	0	0	0	0	0	0	0	0	0	0	0	0	0	0	0	0	0	0	0	0	0
Solyc00g085780	0		0	0	0	0	0	0	0	0	0	0	0	0	0	0	0	0	0	0	0	0	0	0	0	0	0	0	0	0	0	0	0	0	0	0	0	0	0	0	0	0	0	0	0	0	0	0	0
Solyc00g088080	0.02		0	0	0	0	0	0	0	0	0	0	0	0	0	0	0	0	0	0	0	0	0	0	0	0	0	0	0	0	0	0	0	0	0	0	0	0	0	0	0	0	0	0	0	0	0	0	0
Solyc00g088090	0		0	0	0	0	0	0	0	0	0	0	0	0	0	0	0	0	0	0	0	0	0	0	0	0	0	0	0	0	0	0	0	0	0	0	0	0	0	0	0	0	0	0	0	0	0	0	0
Solyc00g088190	0		0	0	0	0	0	0	0	0	0	0	0	0	0	0	0	0	0	0	0	0	0	0	0	0	0	0	0	0	0	0	0	0	0	0	0	0	0	0	0	0	0	0	0	0	0	0	0
Solyc00g088200	0		0	0	0	0	0	0	0	0	0	0	0	0	0	0	0	0	0	0	0	0	0	0	0	0	0	0	0	0	0	0	0	0	0	0	0	0	0	0	0	0	0	0	0	0	0	0	0
Solyc00g088210	0		0	0	0	0	0	0	0	0	0	0	0	0	0	0	0	0	0	0	0	0	0	0	0	0	0	0	0	0	0	0	0	0	0	0	0	0	0	0	0	0	0	0	0	0	0	0	0
Solyc00g090110	0		0	0	0	0	0	0	0	0	0	0	0	0	0	0	0	0	0	0	0	0	0	0	0	0	0	0	0	0	0	0	0	0	0	0	0	0	0	0	0	0	0	0	0	0	0	0	0
Solyc00g090120	0		0	0	0	0	0	0	0	0	0	0	0	0	0	0	0	0	0	0	0	0	0	0	0	0	0	0	0	0	0	0	0	0	0	0	0	0	0	0	0	0	0	0	0	0	0	0	0
Solyc00g090130	0.02		0	0	0	0	0	0	0	0	0	0	0	0	0	0	0	0	0	0	0	0	0	0	0	0	0	0	0	0	0	0	0	0	0	0	0	0	0	0	0	0	0	0	0	0	0	0	0
Solyc00g090430	0.0966667		0	0	0	0	0	0	0	0	0	0	0	0	0	0	0	0	0	0	0	0	0	0	0	0	0	0	0	0.0225	0	0	0	0	0	0	0	0.0225	0	0	0	0	0	0	0	0	0	0	0
Solyc00g090630	0.2175		0	0	0	0	0	0	0	0	0	0	0	0	0	0	0	0	0	0	0	0	0	0	0	0	0	0	0	0	0	0	0	0	0	0	0	0.055	0	0	0	0	0.03	0	0	0	0	0	0.025
Solyc00g090640	0		0	0	0	0	0	0	0	0	0	0	0	0	0	0	0	0	0	0	0	0	0	0	0	0	0	0	0	0	0	0	0	0	0	0	0	0	0	0	0	0	0	0	0	0	0	0	0
Solyc00g090650	0		0	0	0	0	0	0	0	0	0	0	0	0	0	0	0	0	0	0	0	0	0	0	0	0	0	0	0	0	0	0	0	0	0	0	0	0	0	0	0	0	0	0	0	0	0	0	0
Solyc00g090660	0		0	0	0	0	0	0	0	0	0	0	0	0	0	0	0	0	0	0	0	0	0	0	0	0	0	0	0	0	0	0	0	0	0	0	0	0	0	0	0	0	0	0	0	0	0	0	0
Solyc00g090860	0.11		0	0	0.025	0	0	0.0225	0.035	0	0.0275	0	0.0332603	0.0275	0	0	0	0.0225	0	0.02	0.0325	0.0275	0	0	0.035	0.03	0	0	0	0	0	0	0	0	0	0	0	0	0	0	0	0.0225	0	0	0.025	0.0225	0	0	0.0217466
Solyc00g090870	32.325	Expressed	0.131698	0.472326	0.308126	0.269672	0.424362	0.325202	0.151712	0.586352	0.579531	0.351105	0.677661	0.358992	0.623022	0.370596	0.263201	0.357057	1.1201	1.33876	0.763528	0.321646	0.154509	0.388598	0.663733	0.294052	0.646586	0.541002	0.794119	0.14428	0.56701	0.23005	0.319932	0.21002	1.85337	0.392726	0.344166	0.16013	1.70652	0.319205	0.544432	0.239322	0.382282	0.398602	0.516194	0.214724	0.377721	0.0511534	0.153968
Solyc00g091170	34.9533	Expressed	1.25499	3.07537	1.23157	0.624652	0.212093	0.856819	1.12769	0.4389	0.534018	0.335742	0.305324	0.269042	0.208342	0.0533073	0.211517	0.188459	4.21656	2.04173	0.85191	0.718695	0.465463	0.47914	0.325141	0.582157	0.362523	0.189709	0.244621	0.20918	0.233292	0.270289	0.111542	0.302559	0.676667	2.38502	0.172838	0.389166	0.631704	0.20662	0.773933	0.749326	0.260224	0.189269	0.351031	0.0578072	0.109649	0.133947	0.0895707
Solyc00g092870	0		0	0	0	0	0	0	0	0	0	0	0	0	0	0	0	0	0	0	0	0	0	0	0	0	0	0	0	0	0	0	0	0	0	0	0	0	0	0	0	0	0	0	0	0	0	0	0
Solyc00g092880	0.055		0	0	0	0	0	0	0	0	0	0	0	0	0	0	0	0	0	0	0	0	0	0	0	0	0	0	0	0	0	0	0	0	0	0	0	0	0	0	0	0	0	0	0	0	0	0	0
Solyc00g092890	0.025		0	0	0	0	0	0	0	0	0	0	0	0	0	0	0	0	0	0	0	0	0	0	0	0	0	0	0	0	0	0	0	0	0	0	0	0	0	0	0	0	0	0	0	0	0	0	0
Solyc00g092900	0.1775		0	0	0	0.025	0.0275	0.0543139	0.0487126	0.0348807	0.106536	0.0477842	0.088459	0	0.0291548	0.0509902	0.0625	0.0705189	0	0	0	0.0275	0.0327872	0.0025	0.03	0.0320156	0.035	0.0730725	0.0440643	0.0327554	0.0375	0.0275	0.0262599	0.0355903	0	0	0.025	0.045	0.0325	0.02	0.0179699	0.0525	0	0	0.03	0	0.0457347	0.0239357	0.0225462
Solyc00g093000	1.59	Expressed	0	0.0995825	0.0403113	0.139851	0.0292617	0.179188	0.236696	0.06408	0.217845	0.105069	0.149722	0.112129	0.111766	0.16464	0.170606	0.108551	0.263333	0.0657489	0.114846	0.0930054	0.0976708	0.177059	0.163529	0.0971253	0.171367	0.249011	0.18701	0.0920598	0.171586	0.0725	0.0829031	0.101848	0.107134	0	0.113505	0.146707	0.0985309	0.0884473	0.149241	0.104033	0.0359108	0.091697	0.0722697	0.111383	0.0841625	0.0154785	0.154131
Solyc00g093100	0		0	0	0	0	0	0	0	0	0	0	0	0	0	0	0	0	0	0	0	0	0	0	0	0	0	0	0	0	0	0	0	0	0	0	0	0	0	0	0	0	0	0	0	0	0	0	0
Solyc00g093300	0.0775		0	0	0	0.025	0	0	0	0	0	0	0	0	0	0	0	0	0.0333333	0.02	0	0	0	0	0	0	0	0	0	0	0	0	0	0	0	0	0.035	0.0225	0.0325	0	0	0.02	0	0.0275	0	0	0	0	0
Solyc00g093310	4.8525	Expressed	0	0	0	0	0.0325	0	0	0	0	0	0	0	0	0	0	0	0.0333333	0.0275	0.025	0.0275	0	0	0.0325	0	0.035	0	0	0	0	0	0	0	0	0	0.0601907	0.185399	0.065	0	0	0	0.0410284	0.025	0.0332603	0	0.035	0.0225	0
Solyc00g094010	0		0	0	0	0	0	0	0	0	0	0	0	0	0	0	0	0	0	0	0	0	0	0	0	0	0	0	0	0	0	0	0	0	0	0	0	0	0	0	0	0	0	0	0	0	0	0	0
Solyc00g094020	0.5125		0	0	0	0	0	0	0	0	0	0	0	0	0	0	0	0	0	0	0	0	0	0	0	0	0	0	0	0	0	0	0	0	0	0	0.0280995	0	0	0	0	0	0	0	0	0	0	0	0
Solyc00g094520	11.995	Expressed	0.123333	0.224091	0.042106	0.240256	0.0385141	0.175137	0.0411045	0.0635741	0.0767029	0.110557	0.0948683	0.0788855	0.126853	0.0764172	0.183053	0.156738	1.72	0.521552	0.156598	0.0804674	0.210634	0.163248	0.0801561	0.082095	0.0810864	0.105594	0.123246	0.120485	0.150741	0.0968138	0.133198	0.12392	0.276727	1.02344	0.0978945	0.0392641	0.0594418	0.0347311	0.070297	0.0814964	0.150962	0.0736405	0.0983616	0.0784219	0.181309	0.0998645	0.137447
Solyc00g094530	20.5825	Expressed	0	0.487261	0.111841	0.44485	0.160156	0.232182	0.127997	0.138834	0.0785812	0.0873093	0.0940744	0.101602	0.131806	0.0596343	0.22609	0.339199	0.173333	0.714353	0.122509	0.0515388	0.17158	0.163146	0.0736405	0.195235	0.139784	0.131173	0.0839643	0.102021	0.218499	0.0579332	0.205968	0.144244	0.121655	0.355293	0.174809	0.120856	0.0805709	0.0829659	0.101766	0.0460751	0.107034	0.0651281	0.215228	0.138286	0.108733	0.118348	0.160338
Solyc00g094540	1.03	Expressed	0.03	0	0.03	0	0.0325	0	0	0	0	0	0	0	0.03	0	0.0625	0	0.03	0	0.07	0	0	0	0	0	0	0	0.0675	0	0	0.02	0.0451848	0.0125	0.03	0.112891	0	0.0225	0.0325	0	0.0303795	0	0	0	0.0278014	0	0	0.0175	0.0175
Solyc00g094550	9.575	Expressed	0	0.229202	0.0804674	0.0521217	0.0475	0.0612883	0.0291548	0.0348807	0.0528165	0.0653835	0.0442295	0.0234521	0.0259808	0.0314576	0.0776075	0.142617	0.03	0.287649	0.03966	0.057735	0.0740917	0.0875	0.068374	0.0614241	0.0579332	0.0294392	0.075	0.0382971	0.0806613	0.068374	0.0262599	0.140082	0.0883805	0.0433333	0.0797261	0.0738664	0.0552268	0.0348807	0.0989423	0.0495606	0.03	0.0298259	0.0332603	0.0363719	0.0930949	0.02529	0.0693271
Solyc00g094850	2.7625	Expressed	0	0	0	0	0	0	0	0	0	0	0	0	0	0	0	0	0	0	0	0	0	0.03	0	0	0	0	0	0	0	0	0	0	0	0	0	0.0733144	0	0	0	0.0225	0	0	0	0	0.035	0	0
Solyc00g095450	0		0	0	0	0	0	0	0	0	0	0	0	0	0	0	0	0	0	0	0	0	0	0	0	0	0	0	0	0	0	0	0	0	0	0	0	0	0	0	0	0	0	0	0	0	0	0	0
Solyc00g095460	0		0	0	0	0	0	0	0	0	0	0	0	0	0	0	0	0	0	0	0	0	0	0	0	0	0	0	0	0	0	0	0	0	0	0	0	0	0	0	0	0	0	0	0	0	0	0	0
Solyc00g095760	13.6875	Expressed	0.467416	0.953532	0.478618	0.145337	0.025	0.159863	0.138984	0.108349	0.0976708	0	0.03	0.0543139	0.0309233	0.065	0.0792149	0	0.470779	0.8585	0.359479	0.127377	0	0.204751	0.0498957	0.0337577	0.07	0.0244949	0	0.02	0	0	0	0	0.0233333	0.205372	0.0314576	0.0442295	0	0.0619644	0.0265754	0.0325	0	0	0	0	0	0	0
Solyc00g095860	536.53	Expressed	0.0360555	0.874017	0.614668	0.296662	0.578596	2.02656	2.16629	0.583709	1.61107	1.4402	0.72056	2.62932	3.93532	4.91312	2.02583	0.516726	0.0333333	1.08097	0.241639	0.0259808	0.115785	0.628145	0.0420317	0.05058	0.0604152	0.0475	0.1	0.295617	0.131339	0.170654	0.188724	0.545518	0.893874	0.591617	0.071923	0.212186	0.353468	0.156365	0.0570088	0.0567157	0.111093	0.0265754	0.0593015	0.141797	0.1187	0.0476095	0.0804674
Solyc00g096060	0.0933333		0	0	0	0	0	0	0	0	0	0	0	0	0	0	0	0	0	0	0	0	0	0	0	0	0	0	0	0	0	0	0	0	0	0	0	0	0	0	0	0	0	0	0	0	0	0	0
Solyc00g096460	6.1225	Expressed	0	0.247167	0.337997	0.0699405	0.34958	0.506152	0.347659	0.20746	0.403183	0.325947	0.333651	0.433301	0.431016	0.139194	0.453162	0.427034	0	0.313076	0.29951	0.699957	0.552472	0.437271	0.506826	0.28869	0.725506	0.591064	0.225259	0.210411	0.308396	0.144453	0.189533	0.515548	0	0	0.188873	0.363375	0.36357	0.27366	0.0405175	0.363579	0.224815	0.611288	0.390755	0.412258	0.551292	0.452721	0.300804
Solyc00g097260	0.08		0	0	0	0	0	0	0	0	0	0	0	0	0	0	0	0	0	0	0	0	0	0	0	0	0	0	0	0	0	0	0	0	0	0	0	0	0	0	0	0	0	0	0	0	0	0	0
Solyc00g097760	0.0525		0	0	0	0	0	0	0	0	0	0	0	0	0	0	0	0	0	0	0	0	0	0	0	0	0	0	0	0	0	0	0	0	0	0	0	0	0	0	0.025	0	0	0	0	0	0	0	0
Solyc00g097960	5.705	Expressed	0	0.611957	0.180618	0.37111	0.0721688	0.266114	0.248546	0.145681	0.259181	0.440104	0.22717	0.1767	0.186654	0.154077	0.100208	0.228801	0.0333333	0.0554339	0.171628	0.216809	0.209643	0.236379	0.213327	0.214491	0.206256	0.186921	0.254198	0.134436	0.157659	0.0623832	0.0635741	0.118814	0	0.0666667	0.33255	0.398526	0.161729	0.157659	0.22555	0.350274	0.154022	0.0806613	0.161471	0.0907722	0.142537	0.15061	0.0502286
Solyc00g098560	42.4375	Expressed	3.14866	0.862376	1.20921	2.60662	1.60686	1.13601	0.593935	0.814033	0.947562	1.68815	1.20727	0.0994569	0.727065	1.06119	0.44793	0.637162	0.290918	0.827028	1.09124	1.1428	0.751404	1.03188	0.707936	0.573353	0.83263	1.45628	0.373965	0.390926	0.304477	0.413005	0.423989	0.319515	0.982061	0.145717	1.7707	1.02102	0.945815	0.231769	1.37539	0.99292	0.326914	0.324072	0.82421	0.281603	0.309822	0.280576	0.431451
Solyc00g099160	0.116667		0	0	0	0	0	0	0	0	0	0	0	0	0	0	0	0	0	0	0	0	0	0	0	0	0	0	0	0	0	0	0	0	0.03	0.0404145	0	0	0	0	0	0	0	0	0	0	0.0325	0	0
Solyc00g099460	0.116667		0	0	0	0	0	0	0	0	0	0	0	0	0	0	0	0	0.0666667	0	0	0	0	0	0	0	0	0	0	0	0	0	0	0	0	0	0	0	0	0	0	0	0	0	0	0	0	0	0
Solyc00g099470	0		0	0	0	0	0	0	0	0	0	0	0	0	0	0	0	0	0	0	0	0	0	0	0	0	0	0	0	0	0	0	0	0	0	0	0	0	0	0	0	0	0	0	0	0	0	0	0
Solyc00g099570	0		0	0	0	0	0	0	0	0	0	0	0	0	0	0	0	0	0	0	0	0	0	0	0	0	0	0	0	0	0	0	0	0	0	0	0	0	0	0	0	0	0	0	0	0	0	0	0
Solyc00g099580	2.13	Expressed	0	0.340061	0.0744284	0.0597913	0.0348807	0.0327872	0.0347311	0.0570636	0	0.0325	0.03	0.0275	0.03	0	0	0	0	0.115857	0.0475	0.0574456	0.0225	0	0	0	0	0	0	0	0	0	0	0	0	0	0.075	0.113826	0.0510514	0	0.0332603	0.02	0.0525	0.025	0	0	0	0	0
Solyc00g099880	0.035		0	0	0	0	0	0	0	0	0	0	0	0	0	0	0	0	0	0	0	0	0	0	0	0	0	0	0	0	0	0	0	0	0	0	0	0	0	0	0	0	0	0	0	0	0.035	0	0
Solyc00g100880	1.0175	Expressed	0	0	0	0	0	0.03	0	0	0	0	0	0	0	0	0	0	0	0	0	0	0.0303795	0	0	0	0	0	0	0	0	0	0	0	0.03	0	0	0	0.0970395	0.0552268	0.223868	0.04	0.0332603	0.025	0.025	0.0225	0.035	0.055	0
Solyc00g101700	0.045		0	0	0	0	0	0	0	0	0	0	0	0.0225	0	0	0	0	0	0	0	0	0	0	0	0	0	0	0	0	0	0	0	0	0	0	0	0	0	0	0	0	0	0	0	0	0	0	0
Solyc00g102000	0.045		0	0	0	0	0	0	0	0	0	0	0	0	0	0	0	0	0	0	0	0	0	0	0	0	0.025	0	0	0	0	0	0	0	0	0	0	0	0	0	0	0	0	0	0.03	0	0	0	0
Solyc00g102400	4.2975	Expressed	0.0833333	0.255355	0.271861	0.21379	0.479835	0.162814	0.363776	0.419849	0.2091	0.439943	0.393793	0.305423	0.291505	0.160228	0.168226	0.178062	0.0333333	0.0543714	0.0628987	0.257132	0.223434	0.322681	0.349297	0.263771	0.328139	0.224662	0.30515	0.155744	0.170214	0.0954376	0.0870345	0.139074	0.0493288	0	0.0842615	0.172355	0.0327554	0.0611692	0.0598609	0.0471478	0.06	0.0275	0.0730725	0.0275	0.0366003	0.0253311	0.02
Solyc00g104200	0.116667		0	0	0	0	0	0	0	0	0	0	0	0	0	0	0	0	0	0	0	0	0	0	0	0	0	0	0	0	0	0	0	0	0	0.0333333	0	0	0	0	0	0	0	0	0	0	0	0	0
Solyc00g104210	0.116667		0	0	0	0	0	0	0	0	0	0	0	0	0	0	0	0	0	0	0	0	0	0	0	0	0	0	0	0	0	0	0	0	0	0.0726483	0	0	0	0	0	0	0	0	0	0	0	0	0
Solyc00g104310	0		0	0	0	0	0	0	0	0	0	0	0	0	0	0	0	0	0	0	0	0	0	0	0	0	0	0	0	0	0	0	0	0	0	0	0	0	0	0	0	0	0	0	0	0	0	0	0
Solyc00g104320	0		0	0	0	0	0	0	0	0	0	0	0	0	0	0	0	0	0	0	0	0	0	0	0	0	0	0	0	0	0	0	0	0	0	0	0	0	0	0	0	0	0	0	0	0	0	0	0
Solyc00g104330	0		0	0	0	0	0	0	0	0	0	0	0	0	0	0	0	0	0	0	0	0	0	0	0	0	0	0	0	0	0	0	0	0	0	0	0	0	0	0	0	0	0	0	0	0	0	0	0
Solyc00g104630	0		0	0	0	0	0	0	0	0	0	0	0	0	0	0	0	0	0	0	0	0	0	0	0	0	0	0	0	0	0	0	0	0	0	0	0	0	0	0	0	0	0	0	0	0	0	0	0
Solyc00g104730	0		0	0	0	0	0	0	0	0	0	0	0	0	0	0	0	0	0	0	0	0	0	0	0	0	0	0	0	0	0	0	0	0	0	0	0	0	0	0	0	0	0	0	0	0	0	0	0
Solyc00g104740	0.0675		0	0	0	0	0	0	0	0	0	0.0325	0	0	0	0	0	0	0	0	0	0	0	0	0	0	0	0	0	0	0	0	0	0	0	0	0	0	0	0	0	0	0	0	0	0	0	0	0
Solyc00g104940	0.0275		0	0	0	0	0	0	0	0	0	0	0	0	0	0	0	0	0	0	0	0	0	0	0	0	0	0	0	0	0	0	0	0	0	0	0	0	0	0.025	0	0	0	0	0	0	0	0	0
Solyc00g105340	0.9125		0	0	0	0.0275	0	0.0375	0.035	0.0348807	0	0	0	0.0275	0	0.035	0.0275	0	0	0.0225	0.0275	0.0275	0.0525	0	0.0361421	0.075	0.025	0	0.035	0.0425	0.035	0	0	0	0	0	0.02529	0.0464579	0.0317543	0.0392641	0.0469707	0.0241523	0.0548293	0.0532877	0.0500625	0.0409268	0	0.0384057	0.0354436
Solyc00g105350	0.54		0	0	0	0	0.0275	0.0259808	0.0225	0.0275	0	0	0	0.0225	0	0	0.03	0.0225	0	0	0	0	0.0275	0	0	0.0812404	0	0	0.02	0.0225	0.035	0	0	0.0239357	0	0	0	0.0762124	0.0531311	0.041508	0.0687235	0.0636887	0.0273861	0.0302765	0.0558831	0.0217945	0.035	0.0275	0.0639499
Solyc00g105750	0.175		0	0	0	0.0225	0	0.0625167	0.0325	0.0332603	0.005	0.0475	0.045	0	0.0375	0.0225	0	0.0332603	0	0.0325	0	0.0545245	0	0.03	0	0	0	0.015	0.05	0.0225	0.02	0	0.0332603	0	0	0	0.0288675	0	0	0	0.0291548	0	0	0	0.0730867	0	0.0325	0.0225	0
Solyc00g106650	5.265	Expressed	0	0.222074	0.289554	0.282031	0.442606	0.140201	0.414877	0.26995	0.341467	0.328897	0.427727	0.23099	0.661039	0.530948	0.453036	0.231242	0	0.15	0.170929	0.369662	0.165448	0.374196	0.290889	0.405853	0.179095	0.573503	0.421256	0.173031	0.598712	0.262964	0.31098	1.11126	0	0	0.303727	0.294307	0.573402	0.127345	0.35433	0.488388	0.241398	0.217078	0.451431	0.281469	0.336477	0.668136	0.170147
Solyc00g107050	7.71	Expressed	0	0.0475	0	0	0	0	0	0	0	0	0	0	0	0	0	0	0	0.0202073	0.155101	0.0526585	0	0	0	0	0	0	0	0	0	0	0	0	0	0	0.111692	0.232755	0	0	0	0	0	0	0	0	0.0275	0	0
Solyc00g107550	0		0	0	0	0	0	0	0	0	0	0	0	0	0	0	0	0	0	0	0	0	0	0	0	0	0	0	0	0	0	0	0	0	0	0	0	0	0	0	0	0	0	0	0	0	0	0	0
Solyc00g108550	2.0825	Expressed	0	0.0784618	0.0922406	0.0253311	0.0433974	0.0295804	0.0225	0.0470815	0.0291548	0.0337577	0.0686021	0.025	0.0225	0.0309233	0.0589491	0.0611521	0	0.0394493	0.0563471	0.0866987	0.00853913	0.0325	0.0275	0.05058	0.0625	0	0	0.0246221	0.02	0.055	0.0291548	0.0829031	0.03	0.36	0.085	0.0273861	0.03	0.0570636	0.025	0.0543714	0.0225	0.0831665	0.0790042	0.0404918	0.0576447	0.0275	0.0234521
Solyc00g109450	0.0775		0	0	0	0	0	0	0	0	0	0	0	0	0	0	0	0	0	0	0	0	0	0	0	0	0	0	0	0	0	0	0	0	0	0	0	0	0	0	0	0	0	0	0	0	0	0	0
Solyc00g109850	0		0	0	0	0	0	0	0	0	0	0	0	0	0	0	0	0	0	0	0	0	0	0	0	0	0	0	0	0	0	0	0	0	0	0	0	0	0	0	0	0	0	0	0	0	0	0	0
Solyc00g109860	0.27		0	0	0	0.0275	0	0	0.0225	0	0	0	0	0	0	0	0	0	0	0	0	0.0575	0	0	0.0325	0.0390246	0	0	0.02	0	0	0	0	0	0	0	0	0	0	0	0	0	0	0	0	0	0	0	0
Solyc00g110060	0.08		0	0	0	0	0	0	0	0	0	0	0	0	0	0	0	0	0	0	0	0	0	0	0	0	0	0	0	0	0	0	0	0.0125	0	0	0.0175	0	0	0	0	0.0275	0	0	0	0.02	0	0	0.025
Solyc00g110070	0		0	0	0	0	0	0	0	0	0	0	0	0	0	0	0	0	0	0	0	0	0	0	0	0	0	0	0	0	0	0	0	0	0	0	0	0	0	0	0	0	0	0	0	0	0	0	0
Solyc00g110370	4.89	Expressed	0	0	0	0.025	0.148577	0.0672062	0.188961	0.263704	0.158712	0.11884	0.157215	0.0259808	0.0225	0.0622495	0.07	0	0	0	0	0.103642	0.0779289	0.0974145	0.149388	0.474945	0.255094	0.294519	0.631519	0.112027	0.0455293	0.0155456	0	0	0	0	0	0.101684	0.0975854	0	0	0.04272	0	0.0278014	0	0	0	0	0
Solyc00g110870	6.9275	Expressed	0.0633333	0.998644	0.27744	0.0465475	0.23659	0.118638	0.134001	0.223098	0.0686173	0.139463	0.169183	0.0600521	0.0596343	0.0566238	0.0275	0.0552834	0	0.335196	0.404524	0.292019	0.100582	0.0352077	0.160364	0.123178	0.058023	0.121544	0.0733712	0.0425	0.0897566	0.0623665	0.0589491	0.0911501	0.09	0.146553	0.11441	0.0514782	0.249433	0.121963	0.0985309	0.137197	0.079425	0.0779423	0.0535413	0.0543139	0.0983616	0.0131498	0.0314576
Solyc00g111170	0.035		0	0	0	0	0	0.0225	0.035	0	0	0	0	0.0225	0	0	0	0	0	0	0	0	0	0	0	0	0	0	0	0	0	0	0	0.0125	0	0	0	0	0	0	0	0	0	0	0	0.02	0	0	0
Solyc00g111270	0.1125		0	0	0	0	0.040078	0	0.0259808	0.03	0	0.0477842	0	0.025	0	0	0	0	0	0	0	0.0303795	0.0291548	0.0309233	0.065	0.0327554	0	0.025	0.0319831	0	0	0.025	0.0225	0.0125	0	0	0	0	0	0.02	0	0	0	0.03	0	0	0	0	0
Solyc00g111370	0.0625		0	0	0	0	0	0	0	0	0	0	0	0	0	0	0	0	0	0	0	0	0	0	0	0	0	0	0	0	0	0	0	0	0	0	0	0	0	0	0	0	0	0.03	0	0	0	0	0
Solyc00g111770	1.49	Expressed	0	0.0225	0	0	0	0	0	0	0	0	0	0	0	0	0	0	0	0.0348807	0	0	0	0	0	0	0	0	0	0	0	0	0	0	0	0	0.025	0	0	0	0	0	0	0	0	0	0	0	0
Solyc00g111780	0.46		0	0.0325	0	0	0	0	0	0.0325	0	0	0	0	0	0.0275	0	0	0	0.0689656	0	0	0	0	0	0	0	0	0	0	0	0	0	0	0	0	0.05058	0	0	0	0.0225	0	0	0	0	0	0.0325	0	0
Solyc00g112180	3.6	Expressed	0	0.045	0.041508	0.0590903	0	0.0309233	0	0.0275	0.0275	0.0625	0	0.041508	0.0275	0.0314576	0.045	0.03	0	0.0476751	0.0475	0.025	0.0275	0.03	0.03	0	0.0390246	0.015	0	0.0246221	0	0.041508	0.0275	0.0239357	0.03	0	0.0714143	0	0	0	0.0253311	0.120035	0.0275	0.025	0.0320156	0.0402854	0.0390246	0.0430842	0.0175
Solyc00g112190	4.04	Expressed	0.03	0.04272	0.041508	0.0749861	0	0.0309233	0	0.0275	0.0275	0.0625	0.0225	0.041508	0.0275	0.0314576	0.045	0.03	0.03	0.0392641	0.0452769	0.0303795	0.0525	0.03	0.03	0	0.0390246	0.015	0	0.0246221	0	0.041508	0.0275	0.0239357	0.0338296	0.0833333	0.0750972	0	0	0	0.0253311	0.120035	0.0275	0.025	0.0590727	0.0402854	0.0390246	0.0430842	0.0234521
Solyc00g112490	0		0	0	0	0	0	0	0	0	0	0	0	0	0	0	0	0	0	0	0	0	0	0	0	0	0	0	0	0	0	0	0	0	0	0	0	0	0	0	0	0	0	0	0	0	0	0	0
Solyc00g112500	0.0575		0	0	0	0	0	0	0	0	0	0	0	0	0	0	0	0	0	0	0	0	0	0	0	0	0	0	0	0	0	0	0	0	0	0	0	0	0	0	0	0	0	0	0	0	0	0	0
Solyc00g112600	0.045		0	0	0	0	0	0	0	0	0	0	0	0	0	0	0	0	0	0	0	0	0	0	0	0	0	0	0	0	0	0	0	0	0	0	0.0175	0	0	0	0	0	0	0	0	0	0	0	0
Solyc00g112700	0		0	0	0	0	0	0	0	0	0	0	0	0	0	0	0	0	0	0	0	0	0	0	0	0	0	0	0	0	0	0	0	0	0	0	0	0	0	0	0	0	0	0	0	0	0	0	0
Solyc00g112710	0		0	0	0	0	0	0	0	0	0	0	0	0	0	0	0	0	0	0	0	0	0	0	0	0	0	0	0	0	0	0	0	0	0	0	0	0	0	0	0	0	0	0	0	0	0	0	0
Solyc00g112810	0		0	0	0	0	0	0	0	0	0	0	0	0	0	0	0	0	0	0	0	0	0	0	0	0	0	0	0	0	0	0	0	0	0	0	0	0	0	0	0	0	0	0	0	0	0	0	0
Solyc00g112820	0		0	0	0	0	0	0	0	0	0	0	0	0	0	0	0	0	0	0	0	0	0	0	0	0	0	0	0	0	0	0	0	0	0	0	0	0	0	0	0	0	0	0	0	0	0	0	0
Solyc00g112830	0.035		0	0.0225	0	0	0	0	0	0	0	0	0.0275	0	0	0	0	0	0	0.02	0	0.0275	0.0225	0	0.035	0.035	0	0	0	0	0	0	0	0.0125	0	0	0	0	0	0	0	0	0	0	0	0	0	0	0
Solyc00g112930	0.795		0	0.0398696	0.0455522	0.0291548	0.025	0.145852	0.107897	0.0390246	0.0875	0.0911501	0.151568	0.0388104	0.0291548	0	0.025	0.0332603	0	0.11143	0.0969858	0.0545245	0.0901272	0.0567157	0.0879867	0.102337	0.0833167	0.0837158	0.126976	0.02	0.075	0	0.0273861	0.0225	0	0	0.07	0.0442295	0.0325	0.0225	0.0442295	0.0554339	0.025	0.0275	0.0275	0	0	0.0225	0
Solyc00g113230	0.0425		0	0	0	0	0	0	0	0	0	0	0	0	0	0	0	0	0	0	0	0	0	0	0	0	0	0	0	0	0	0	0	0	0	0	0	0	0	0	0	0	0	0	0	0	0	0	0
Solyc00g113330	0.0825		0	0	0	0	0	0	0	0	0	0	0	0	0	0	0	0	0	0	0	0	0	0	0	0	0	0	0	0	0	0	0	0	0	0	0	0.0332603	0	0	0	0	0	0	0	0	0	0	0
Solyc00g113730	0		0	0	0	0	0	0	0	0	0	0	0	0	0	0	0	0	0	0	0	0	0	0	0	0	0	0	0	0	0	0	0	0	0	0	0	0	0	0	0	0	0	0	0	0	0	0	0
Solyc00g113740	0		0	0	0	0	0	0	0	0	0	0	0	0	0	0	0	0	0	0	0	0	0	0	0	0	0	0	0	0	0	0	0	0	0	0	0	0	0	0	0	0	0	0	0	0	0	0	0
Solyc00g113750	0.0266667		0	0	0	0	0	0	0	0	0	0	0	0	0	0	0	0	0	0	0	0	0	0	0	0	0	0	0	0	0	0	0	0	0	0	0	0	0	0	0	0	0	0	0	0	0	0	0
Solyc00g114550	0.0525		0	0	0	0	0	0	0	0	0	0	0	0	0	0	0	0	0	0	0	0	0	0	0	0	0	0	0	0	0	0	0	0	0	0	0	0	0	0	0	0	0	0	0	0	0	0	0
Solyc00g116150	0.485		0	0	0	0	0	0	0	0	0	0	0	0	0	0	0	0	0	0	0	0	0	0	0	0	0	0	0	0	0	0	0	0	0	0	0	0.03	0	0	0	0	0.0275	0	0	0	0	0	0
Solyc00g117450	0.055		0	0.0327872	0	0	0	0	0	0	0	0	0	0	0.0225	0	0	0	0	0.0275	0.0275	0	0	0	0	0	0	0	0	0	0	0	0	0	0	0	0	0	0	0	0	0	0	0	0	0	0	0	0
Solyc00g117650	0		0	0	0	0	0	0	0	0	0	0	0	0	0	0	0	0	0	0	0	0	0	0	0	0	0	0	0	0	0	0	0	0	0	0	0	0	0	0	0	0	0	0	0	0	0	0	0
Solyc00g118680	2.8925	Expressed	0.408575	0.178483	0.0648556	0.065622	0.177828	0.0512144	0.150796	0.0915605	0.0941077	0.12392	0.117925	0.126095	0.234752	0.164317	0.190526	0.230484	0.592743	0.105317	0.126853	0.0936638	0.19841	0.191719	0.114483	0.116154	0.0966523	0.128906	0.134063	0.10053	0.122474	0.0804156	0.173901	0.274359	0.187705	0.164148	0.0911043	0.0290115	0.032914	0.138924	0.291476	0.10025	0.055584	0.172016	0.20135	0.0648556	0.3017	0.133876	0.0943729
Solyc00g118690	54.4875	Expressed	0.0664162	0.42195	0.285989	0.157056	0.401757	0.33577	0.382565	0.39411	0.233608	0.345024	0.852565	0.545151	0.573489	0.294204	0.261418	0.157235	0.0578312	0.869869	0.553971	0.272977	0.407255	0.601171	1.11848	0.24259	0.951586	0.337451	0.282769	0.595656	0.407124	0.411833	0.41586	0.474085	0.668838	0.378197	0.795472	0.712227	0.318996	0.437855	0.494762	1.18546	0.271335	0.440625	0.277624	0.305242	0.764639	0.245645	0.292731
Solyc00g120120	0		0	0	0	0	0	0	0	0	0	0	0	0	0	0	0	0	0	0	0	0	0	0	0	0	0	0	0	0	0	0	0	0	0	0	0	0	0	0	0	0	0	0	0	0	0	0	0
Solyc00g120820	0		0	0	0	0	0	0	0	0	0	0	0	0	0	0	0	0	0	0	0	0	0	0	0	0	0	0	0	0	0	0	0	0	0	0	0	0	0	0	0	0	0	0	0	0	0	0	0
Solyc00g120830	0		0	0	0	0	0	0	0	0	0	0	0	0	0	0	0	0	0	0	0	0	0	0	0	0	0	0	0	0	0	0	0	0	0	0	0	0	0	0	0	0	0	0	0	0	0	0	0
Solyc00g120930	0		0	0	0	0	0	0	0	0	0	0	0	0	0	0	0	0	0	0	0	0	0	0	0	0	0	0	0	0	0	0	0	0	0	0	0	0	0	0	0	0	0	0	0	0	0	0	0
Solyc00g121230	0.1525		0	0	0	0	0.0625	0	0.065	0.0361421	0	0.0337577	0.0309233	0.0275	0.0259808	0.0377492	0	0	0	0	0	0	0	0.03	0	0.0325	0	0	0	0.0425	0.02	0	0.0225	0.025	0	0	0.025	0	0.03	0	0.0225	0.04	0.0225	0	0	0	0.0275	0.0175	0.0175
Solyc00g121730	0.0775		0	0	0	0	0	0	0	0	0	0	0	0	0	0	0	0	0	0	0	0	0	0	0	0	0	0	0	0	0	0	0	0	0	0	0	0	0	0	0	0	0	0	0	0	0.0275	0	0
Solyc00g122530	0		0	0	0	0	0	0	0	0	0	0	0	0	0	0	0	0	0	0	0	0	0	0	0	0	0	0	0	0	0	0	0	0	0	0	0	0	0	0	0	0	0	0	0	0	0	0	0
Solyc00g123030	0		0	0	0	0	0	0	0	0	0	0	0	0	0	0	0	0	0	0	0	0	0	0	0	0	0	0	0	0	0	0	0	0	0	0	0	0	0	0	0	0	0	0	0	0	0	0	0
Solyc00g123040	0.0733333		0	0	0	0	0	0	0	0	0	0	0	0	0	0	0	0	0	0	0	0	0	0	0	0	0	0	0	0	0	0	0	0	0	0	0	0	0	0	0	0	0	0	0	0	0	0	0
Solyc00g123240	0.373333		0	0	0	0	0	0	0	0	0	0	0	0	0	0	0	0	0	0	0	0	0	0	0	0	0	0	0	0	0	0	0	0	0	0	0.0426956	0.0225	0.0325	0	0	0	0	0	0	0	0	0	0
Solyc00g124840	0.0433333		0	0	0	0	0	0	0	0	0	0	0	0	0	0	0	0	0	0	0	0	0	0	0	0	0	0	0	0	0	0	0	0	0	0	0	0	0	0	0	0	0	0	0	0	0	0	0
Solyc00g124850	0		0	0	0	0	0	0	0	0	0	0	0	0	0	0	0	0	0	0	0	0	0	0	0	0	0	0	0	0	0	0	0	0	0	0	0	0	0	0	0	0	0	0	0	0	0	0	0
Solyc00g124860	0.2025		0.03	0	0	0	0	0	0	0	0	0	0	0	0	0	0	0.0275	0	0	0	0	0	0	0	0	0	0	0	0	0	0	0	0	0	0	0	0.0275	0	0	0	0	0	0.09259	0.03	0	0	0	0
Solyc00g125260	0		0	0	0	0	0	0	0	0	0	0	0	0	0	0	0	0	0	0	0	0	0	0	0	0	0	0	0	0	0	0	0	0	0	0	0	0	0	0	0	0	0	0	0	0	0	0	0
Solyc00g125270	0.0675		0	0	0	0	0	0	0	0.0275	0	0	0	0	0	0	0	0	0	0	0	0	0	0	0	0	0	0	0	0	0	0	0	0	0	0	0	0	0	0.0225	0	0	0	0	0	0.02	0	0	0
Solyc00g125580	2.9775	Expressed	0	0	0	0	0	0	0	0	0	0	0	0	0	0	0	0	0	0	0.0275	0.0275	0.0291548	0.03	0	0.03	0	0	0	0.0225	0	0	0.0275	0	0	0	0.0976388	0	0.03	0.02	0.05	0	0	0	0	0	0	0.0234521	0
Solyc00g125980	35.6475	Expressed	2.12516	0.727477	0.256596	0.242315	0.486347	0.332177	0.366083	0.315489	0.558226	0.306387	0.273161	0.121963	0.652474	0.217845	0.383044	0.287417	0	0.835833	0.922807	0.468373	0.258372	0.592551	0.3342	0.353727	0.664346	0.241764	0.284912	0.282636	0.492993	0.158081	0.0597913	0.337673	0.0352767	0.108167	1.63129	0.804477	0.735282	0.47912	1.19033	0.540925	0.12842	0.201515	0.232536	0.265094	0.287301	0.137871	0.116717
Solyc00g125990	20.8975	Expressed	0.0360555	0.464173	0.25283	0.287315	0.228815	0.122023	0.326659	0.460821	0.303933	0.226826	0.25531	0.549212	0.786038	0.375264	0.219407	0.498773	0	0.800535	0.490516	0.842302	0.261072	0.554685	0.579598	0.387414	0.455714	0.143607	0.255571	0.375422	0.557007	0.361029	0.290528	0.522532	0.0272845	0.0833333	0.868265	0.518803	0.41086	0.373193	0.646922	0.448077	0.438527	0.467333	0.575071	0.196829	0.312207	0.133978	0.286502
Solyc00g126000	14.39	Expressed	0.04	0.222299	0.226587	0.109877	0.287877	0.0877852	0.354363	0.490941	0.29056	0.156491	0.321802	0.38953	0.661904	0.343108	0.161316	0.488484	0	0.315529	0.401591	0.720046	0.161368	0.447686	0.66056	0.452168	0.402748	0.0557337	0.254145	0.371514	0.597458	0.339841	0.335298	0.573591	0.0272845	0.0833333	0.734722	0.593528	0.446008	0.423104	0.687536	0.489172	0.379679	0.405285	0.516236	0.24723	0.36149	0.187367	0.28247
Solyc00g126010	8.355	Expressed	0	0.122916	0.201577	0.0846931	0.251827	0.218956	0.29756	0.511865	0.272611	0.147451	0.220775	0.20536	0.406222	0.197779	0.227101	0.266161	0	0.257132	0.309166	0.534655	0.0800391	0.320296	0.309516	0.157612	0.395063	0.0869267	0.239492	0.203116	0.330035	0.239461	0.224258	0.327805	0.0272845	0.0833333	0.496897	0.256596	0.442286	0.471405	0.339178	0.387414	0.232822	0.269861	0.44657	0.101848	0.205203	0.203854	0.224995
Solyc00g126420	0		0	0	0	0	0	0	0	0	0	0	0	0	0	0	0	0	0	0	0	0	0	0	0	0	0	0	0	0	0	0	0	0	0	0	0	0	0	0	0	0	0	0	0	0	0	0	0
Solyc00g126430	0		0	0	0	0	0	0	0	0	0	0	0	0	0	0	0	0	0	0	0	0	0	0	0	0	0	0	0	0	0	0	0	0	0	0	0	0	0	0	0	0	0	0	0	0	0	0	0
Solyc00g126440	0		0	0	0	0	0	0	0	0	0	0	0	0	0	0	0	0	0	0	0	0	0	0	0	0	0	0	0	0	0	0	0	0	0	0	0	0	0	0	0	0	0	0	0	0	0	0	0
Solyc00g127540	0.055		0	0	0	0	0	0	0	0	0	0	0	0	0	0	0	0	0	0	0	0	0	0	0	0	0	0	0	0	0	0	0	0	0	0	0	0	0	0	0	0	0	0	0	0	0	0	0
Solyc00g127550	0		0	0	0	0	0	0	0	0	0	0	0	0	0	0	0	0	0	0	0	0	0	0	0	0	0	0	0	0	0	0	0	0	0	0	0	0	0	0	0	0	0	0	0	0	0	0	0
Solyc00g127560	0		0	0	0	0	0	0	0	0	0	0	0	0	0	0	0	0	0	0	0	0	0	0	0	0	0	0	0	0	0	0	0	0	0	0	0	0	0	0	0	0	0	0	0	0	0	0	0
Solyc00g127660	66.0967	Expressed	1.78274	0.262472	0.858841	0.687088	0.845104	0.707688	0.731623	0.755705	0.200375	0.7884	0.524444	0.590706	1.06486	0.538648	0.437759	0.502908	5.8121	0.761364	1.14352	1.15216	0.461761	0.979306	0.485993	0.344126	0.749148	0.981864	0.440461	0.555793	0.888984	0.42935	0.616703	1.88035	0.697639	1.46856	0.878246	0.9044	0.363212	0.839062	0.628296	0.326736	0.731807	0.696938	0.975529	0.385149	1.19988	0.173656	0.519092
Solyc00g127670	24.1867	Expressed	5.36672	0.485444	0.56904	0.417003	0.409898	0.169337	0.216386	0.591501	0.322887	0.567553	0.791374	0.220964	0.0899537	0.2604	0.361144	0.0962635	7.13327	0.755672	0.450934	0.218441	0.246999	0.243465	0.31504	0.222804	0.168739	0.292418	0.473663	0.179768	0.132248	0.286836	0.25362	0.23038	2.21861	4.32997	0.213892	0.854989	0.463004	0.188702	0.296606	0.223061	0.0739792	0.134931	0.206453	0.0385141	0.188298	0.122975	0.0641613
Solyc00g127870	87.36	Expressed	3.40171	0.538679	0.465806	0.351592	0.740342	0.592917	0.306988	0.531717	0.329984	0.647379	0.236797	0.350927	0.224239	0.146536	0.182363	0.155215	1.80073	0.274055	0.514854	0.39563	0.382721	0.500905	0.311676	0.664135	0.465233	0.284077	0.183093	0.0520416	0.253258	0.0841625	0.127965	0.105781	3.91338	8.60639	0.526854	0.472485	0.213717	0.137197	0.380096	0.198888	0.327118	0.174326	0.221261	0.269537	0.0961228	0.117651	0.0986999
Solyc00g128870	96.89	Expressed	6.66625	0.421505	0.443123	0.554715	2.251	0.876198	1.39421	0.982941	0.807326	1.15666	1.30469	0.693943	0.97865	0.546006	1.48851	0.340661	5.33448	1.21387	1.73494	1.98648	1.23314	0.939827	0.626623	1.23871	1.42981	1.76728	0.963919	0.419504	0.29287	0.308204	1.08775	0.694939	1.11735	1.88328	0.522095	0.683916	1.00081	1.05958	0.726491	0.143353	0.304641	0.759675	0.403702	0.542423	1.15652	0.40952	1.35308
Solyc00g129670	0		0	0	0	0	0	0	0	0	0	0	0	0	0	0	0	0	0	0	0	0	0	0	0	0	0	0	0	0	0	0	0	0	0	0	0	0	0	0	0	0	0	0	0	0	0	0	0
Solyc00g129680	0.11		0	0	0	0	0	0	0	0	0	0	0	0	0	0	0	0	0.03	0	0	0	0	0	0	0	0	0.025	0	0	0	0	0	0	0	0	0	0	0	0.0225	0	0.0225	0	0.0450925	0	0	0	0.0275	0.025
Solyc00g129880	0.0325		0	0	0	0	0	0	0	0	0	0	0	0	0	0	0	0	0	0	0	0	0	0	0	0	0	0	0	0	0	0	0	0	0	0	0	0	0	0	0	0	0	0	0	0	0	0	0
Solyc00g129980	0		0	0	0	0	0	0	0	0	0	0	0	0	0	0	0	0	0	0	0	0	0	0	0	0	0	0	0	0	0	0	0	0	0	0	0	0	0	0	0	0	0	0	0	0	0	0	0
Solyc00g130180	0		0	0	0	0	0	0	0	0	0	0	0	0	0	0	0	0	0	0	0	0	0	0	0	0	0	0	0	0	0	0	0	0	0	0	0	0	0	0	0	0	0	0	0	0	0	0	0
Solyc00g130190	0		0	0	0	0	0	0	0	0	0	0	0	0	0	0	0	0	0	0	0	0	0	0	0	0	0	0	0	0	0	0	0	0	0	0	0	0	0	0	0	0	0	0	0	0	0	0	0
Solyc00g130290	0.0366667		0	0	0	0	0	0	0	0	0	0	0	0	0	0	0	0	0	0	0	0	0	0	0	0	0	0	0	0	0	0	0	0	0	0.0366667	0	0	0	0	0	0	0	0	0	0	0	0	0
Solyc00g130690	0.1975		0	0	0	0.0225	0	0.0325	0	0.03	0	0	0.0332603	0.0259808	0.0225	0.0442295	0.0225	0	0	0.0319831	0.025	0.025	0.0497494	0.0625	0.0361421	0.03	0.0325	0	0.0319831	0.0388104	0.0340343	0.0275	0.0291548	0.0248328	0	0	0	0.0225	0.0325	0	0.0253311	0	0	0	0.0332603	0.02	0.0325	0	0
Solyc00g130700	0		0	0	0	0	0	0	0	0	0	0	0	0	0	0	0	0	0	0	0	0	0	0	0	0	0	0	0	0	0	0	0	0	0	0	0	0	0	0	0	0	0	0	0	0	0	0	0
Solyc00g130800	0		0	0	0	0	0	0	0	0	0	0	0	0	0	0	0	0	0	0	0	0	0	0	0	0	0	0	0	0	0	0	0	0	0	0	0	0	0	0	0	0	0	0	0	0	0	0	0
Solyc00g130810	0		0	0	0	0	0	0	0	0	0	0	0	0	0	0	0	0	0	0	0	0	0	0	0	0	0	0	0	0	0	0	0	0	0	0	0	0	0	0	0	0	0	0	0	0	0	0	0
Solyc00g131610	6.11333	Expressed	0	0	0	0	0	0	0	0	0	0	0	0	0	0	0	0	0	0	0	0	0	0	0	0	0	0	0	0	0	0	0	0	0	0	0	0	0	0	0	0	0	0	0	0	0	0	0
Solyc00g131710	0.1775		0	0	0	0	0.0275	0.0625	0	0	0	0.025	0	0	0	0	0	0	0.03	0	0	0.0522813	0.0325	0	0	0	0	0.025	0	0.02	0	0	0	0	0	0	0	0.0317543	0	0.02	0.043589	0.0225	0.0225	0.025	0.0590727	0	0	0	0
Solyc00g133110	1.03	Expressed	0	0.0225	0.0510514	0.0672062	0.10496	0.0339116	0.14936	0.102987	0.162839	0.100042	0.249499	0.100871	0.107781	0.138624	0.105554	0.106174	0	0.0348807	0	0.0880696	0.0385951	0.0837655	0.0983616	0.151073	0.0471478	0.104592	0.147726	0.0618297	0.100125	0.132947	0.0332603	0.0471478	0	0	0.025	0.06	0	0	0	0.02	0	0	0	0.0225	0	0	0
Solyc00g133710	0.03		0	0	0	0	0	0	0	0	0	0	0.03	0	0	0	0	0	0	0	0	0	0	0	0	0	0	0	0	0	0	0	0	0	0	0	0	0	0	0	0	0	0	0	0	0	0	0	0
Solyc00g133720	0.0675		0	0	0	0	0	0	0	0	0	0	0	0	0	0	0	0	0	0	0.0325	0	0.0325	0	0	0	0	0	0	0	0.0340343	0	0	0	0	0	0	0.0275	0	0	0.0275	0	0	0	0	0	0	0	0
Solyc00g134620	1.405	Expressed	0	0.0398696	0.0388373	0.0587367	0.0473242	0.0437798	0.0648556	0.115641	0.112027	0.162019	0.115063	0.0452769	0.0452769	0.0291548	0.03	0.0988581	0	0.0286865	0.0206155	0.0881641	0.0147196	0.0743163	0.0952628	0.0623665	0	0.0288675	0.0567707	0.065	0	0.0476751	0.0225	0.045	0	0	0.0275379	0.0972111	0.123626	0.165397	0.131434	0.149304	0.0392641	0.109049	0.0270801	0.0363719	0.0644205	0.0504975	0.0217466
Solyc00g134820	0		0	0	0	0	0	0	0	0	0	0	0	0	0	0	0	0	0	0	0	0	0	0	0	0	0	0	0	0	0	0	0	0	0	0	0	0	0	0	0	0	0	0	0	0	0	0	0
Solyc00g134830	0.035		0	0	0	0	0	0	0.035	0	0	0	0	0	0	0	0	0	0	0	0	0	0	0	0	0	0	0	0	0	0	0.0275	0	0	0	0	0	0	0	0.025	0	0	0	0	0	0	0	0	0
Solyc00g134840	0		0	0	0	0	0	0	0	0	0	0	0	0	0	0	0	0	0	0	0	0	0	0	0	0	0	0	0	0	0	0	0	0	0	0	0	0	0	0	0	0	0	0	0	0	0	0	0
Solyc00g135040	0.05		0	0	0	0.025	0	0	0	0.0275	0	0	0	0	0	0	0	0.0225	0	0	0	0	0	0	0.035	0	0	0	0	0	0	0	0	0	0	0	0	0	0	0.025	0	0	0	0	0.05	0	0	0	0
Solyc00g135050	0		0	0	0	0	0	0	0	0	0	0	0	0	0	0	0	0	0	0	0	0	0	0	0	0	0	0	0	0	0	0	0	0	0	0	0	0	0	0	0	0	0	0	0	0	0	0	0
Solyc00g135060	0		0	0	0	0	0	0	0	0	0	0	0	0	0	0	0	0	0	0	0	0	0	0	0	0	0	0	0	0	0	0	0	0	0	0	0	0	0	0	0	0	0	0	0	0	0	0	0
Solyc00g135260	0.665		0	0	0	0	0	0	0	0	0	0	0	0	0	0	0	0	0	0	0	0	0.0225	0	0	0	0	0	0	0	0	0	0	0	0	0	0	0.0442295	0.0658755	0	0	0	0	0	0	0.0225	0	0	0
Solyc00g136260	91.26	Expressed	18.8019	1.04144	0.76215	2.73507	4.72666	1.58159	2.02949	3.49101	1.51759	4.56102	3.05076	0.546298	0.481802	0.346566	0.914042	0.171586	9.62666	1.62016	0.512012	3.76858	0.802185	1.09242	2.15353	1.37667	1.68766	3.63098	2.12856	0.248441	0.119957	0.640903	0.452224	0.175808	1.27894	1.18627	0.60145	1.61818	2.55539	1.35173	2.67134	2.93634	0.293598	0.637319	0.887271	0.146707	0.277293	0.272458	0.292076
Solyc00g136560	10.9075	Expressed	0.04	0.0677003	0.030957	0.174756	0.227303	0.207806	0.138954	0.249416	0.697675	0.732966	0.851541	1.61065	0.853516	1.15643	0.744211	0.582337	0	0.0464354	0.0502286	0.0798436	0.0451617	0.0501664	0.183638	0.1251	0.5411	0.2575	0.418397	0.426563	0.578302	0.516339	0.849268	0.741755	0	0	0.0143614	0.0651121	0.185585	0.0982662	0.151795	0.133947	0.294968	0.150852	0.537422	0.420615	0.502568	0.208502	0.708414
Solyc00g138060	2.1775	Expressed	0	0.02	0	0	0	0	0.0225	0	0	0	0	0	0	0.03	0.0225	0.06	0.0333333	0	0	0.025	0.025	0	0	0	0.035	0	0	0.0217945	0.0613052	0.025	0.0620987	0.0125	0	0.0433333	0	0.0442295	0	0.025	0.025	0	0.06	0.03966	0.025	0.199891	0.168739	0.223695	0.312313
Solyc00g139760	0.0225		0	0	0	0	0	0	0	0	0	0	0	0	0	0	0	0	0	0	0	0	0	0	0	0	0	0	0	0	0	0	0	0	0	0	0	0.0225	0	0	0	0	0	0	0	0	0	0	0
Solyc00g140060	60.8775	Expressed	0	0.986614	1.50554	0.556003	1.26448	1.3975	0.580632	1.62628	1.67666	1.09243	1.50437	1.36407	1.87213	0.978029	0.348485	1.06686	0.0333333	0.990295	1.01162	0.671644	1.90448	2.99879	2.97299	3.91815	2.50141	3.1815	1.25933	1.29589	1.86195	0.468384	2.62234	2.45536	0.0409607	0.196667	1.36771	1.49535	3.97441	1.61127	2.84151	1.90023	1.71609	2.8131	1.94264	0.796147	0.792437	0.655598	1.11326
Solyc00g141360	0.95		0	0.0388104	0.0129099	0.0738241	0.083504	0.0803508	0.0405175	0.07587	0.0575	0.0622328	0.03	0	0	0	0	0	0	0.0110868	0.110076	0.0738241	0.0694472	0.0318852	0.0908295	0.0943729	0	0	0.0589315	0	0	0	0	0	0	0	0.0275379	0.0531507	0.0818917	0.0404918	0.0545245	0.0525	0	0	0.0275	0	0	0	0
Solyc00g141560	0.115		0	0	0	0	0	0	0	0	0	0	0	0	0	0	0	0	0	0	0	0	0	0	0	0	0	0	0	0	0	0	0	0	0	0	0	0	0	0	0	0	0	0	0	0	0	0	0
Solyc00g142160	4.795	Expressed	0	0.0583809	0.00629153	0.0566238	0.0964689	0.0371932	0.0857686	0.07587	0.0675	0.10336	0.205305	0.0609645	0.105948	0.151548	0.111084	0.0777817	0	0.0286865	0.146202	0.0637704	0.0313581	0.0540062	0.0682367	0.1	0.0933185	0.0710047	0.0376386	0.0402078	0.0835663	0.0413068	0.0497494	0.0446047	0	0.0333333	0.0335099	0.15467	0.181814	0.041508	0.158981	0.0556028	0.0592136	0.0959601	0.115208	0.056421	0.169969	0.0798958	0.0306526
Solyc00g142170	9.81	Expressed	0	0.0794119	0.0273861	0.0587367	0.0794119	0.0309233	0.131426	0.119609	0.164285	0.143316	0.195166	0.0481966	0.0708725	0.217423	0.157533	0.0865063	0	0.0425	0.157394	0.110378	0.167854	0.066458	0.181951	0.11804	0.129293	0.0663953	0.0794775	0.0259406	0.139366	0.088459	0.0592136	0.0347311	0.246329	0.0896908	0.0280995	0.192153	0.170898	0.111841	0.197019	0.116976	0.092826	0.104433	0.154347	0.0359108	0.210015	0.0941962	0.0812788
Solyc00g143770	4.8725	Expressed	0	0.222612	0.345214	0.11898	0.339841	0.389808	0.141008	0.122091	0.114928	0.280843	0.231391	0.343839	0.11811	0.119539	0.433155	0.242831	0	0.368248	0.16835	0.842035	0.07932	0.318669	0.0898146	0.094989	0.240082	0.288877	0.258425	0.291587	0.214762	0.390392	0.304176	0.123786	0.0233333	0.0433333	0.24537	0.204634	0.240364	0.299454	0.319139	0.102184	0.116574	0.246488	0.177412	0.208926	0.401069	0.0913327	0.210411
Solyc00g144470	77.46	Expressed	0	0.0656379	0.0919239	0	0	0	0	0	0.005	0.0325	0.06	0.538677	0.550475	0.738764	0.897037	1.89266	0.0333333	0.0665207	0.127238	0.147556	0	0.0575	0.0275	0.0579511	0.130192	0.220846	0.184707	2.06399	3.04851	1.14637	1.64333	4.20689	0	0.0366667	0.0515388	0	0	0	0	0	0.658349	1.2307	0.903137	4.02842	8.43155	2.69343	1.96466
Solyc00g145170	13.8833	Expressed	0.0731057	0.0729583	0.127892	0.468446	0.148464	0.0750555	0.0826136	0.117792	0.0275	0.0646787	0.0593015	0.323197	0.0291548	0.0309233	0.0225	0	0	0.0781425	0.0206155	0.0317543	0.0279881	0	0.0601907	0.0355903	0	0	0	0	0	0	0	0	0	0.0366667	0.212304	0.187855	0.110265	0.0275	0.0413068	0.146316	0	0.03	0	0	0	0	0
Solyc00g147570	4.3625	Expressed	0	0	0	0	0.0325	0	0	0.03	0	0.025	0	0	0	0	0	0	0	0.02	0.0225	0.0317543	0	0	0	0	0	0	0	0	0	0.03	0	0	0	0	0.075	0.352077	0	0	0	0.0275	0	0	0	0	0	0	0
Solyc00g147770	4.565	Expressed	0.428421	0.267625	0.155858	0.164082	0.0889757	0.395314	0.219293	0.265361	0.156578	0.12261	0.187994	0.0589315	0.278149	0.230267	0.30895	0.111383	0.296704	0.404609	0.164063	0.140379	0.401674	0.472041	0.224105	0.345314	0.155798	0.251839	0.16469	0.177735	0.224796	0.18332	0.327195	0.214063	0	0.0433333	0.106888	0.185039	0.32882	0.215523	0.137014	0.0648717	0.245675	0.258215	0.157162	0.150465	0.19508	0.152862	0.158588
Solyc00g149970	14.25	Expressed	0	0.120442	0.154272	0.0585057	0.319541	0.0908295	0.177171	0.232177	0.193794	0.123853	0.129639	0.0603462	0.0525	0.0332916	0.03	0.0225	0	0.103521	0.111234	0.180601	0.0839643	0.204995	0.182871	0.47428	0.362273	0.168146	0.0839643	0.124591	0.185338	0.137318	0.0970395	0.0285774	0.0305505	0	0.158975	0.48637	0.394102	0.389131	0.279091	0.667963	0.0817517	0.0776075	0.134807	0.188696	0.0455293	0.0777282	0.105938
Solyc00g153680	5.3175	Expressed	0.269072	0.0525	0.166758	0.22481	0.167997	0.14239	0.0466369	0.144244	0.212068	0.268235	0.11565	0.198704	0.0614241	0.206942	0.0785679	0.11891	0	0.0910471	0.128736	0.0340343	0.250682	0.182363	0.171974	0.099373	0.277999	0.0228674	0.176842	0.0618297	0.150076	0.123187	0.0800391	0.0878801	0	0	0.05	0.183138	0.0492443	0.0730867	0.0149304	0.234627	0.07	0.0575	0.0430842	0.0402854	0.0551513	0.0703562	0.0454606
Solyc00g153980	1.7525	Expressed	0	0.0768521	0.0475	0.0291548	0	0	0.0325	0.0332603	0	0	0	0.0259808	0.0259808	0.0575	0.0786739	0.0760893	0	0.0645981	0.0325	0	0	0	0	0.0361421	0.0355903	0.0244949	0	0.0246221	0.0319831	0	0.0225	0.0609645	0	0	0.0662539	0.0275	0.0325	0.02	0.068374	0.0275	0.0320156	0.0337577	0.00478714	0.0225	0.0322749	0.0175	0.0375
Solyc00g154480	0.105		0	0.0225	0	0.0225	0	0.03	0	0	0.0548483	0.0375278	0	0	0	0	0	0	0	0	0	0.085	0	0	0	0.0361421	0	0	0.0325	0	0.02	0	0	0.0125	0	0	0	0	0	0	0	0	0	0	0.025	0.0225	0	0	0
Solyc00g154980	3.32	Expressed	0	0	0	0.025	0	0	0	0	0	0	0	0	0	0	0	0	0	0	0.0225	0.075	0	0	0	0	0	0	0	0	0	0	0	0	0	0	0	0.0911043	0	0	0	0	0	0	0	0	0	0	0
Solyc00g156980	12.995	Expressed	0	1.05206	0.364083	0.245912	0.492263	0.275847	0.337623	0.279896	0.0526585	0.0622328	0.169189	0	0	0	0	0	0	0.744629	0.354292	0.220014	0.168176	0.03	0	0.0337577	0	0	0	0	0	0	0	0	0	0.333333	0.0925113	0.325947	0.0592136	0	0.025	0.0388104	0.0525	0.03	0	0	0	0	0
Solyc00g157080	4.6325	Expressed	0	0	0.0265754	0.025	0	0.0327872	0.0325	0	0	0	0	0	0	0	0	0	0	0	0.0452769	0.0623665	0.0506623	0.03	0	0	0.025	0.03	0	0	0.055	0	0	0	0	0	0	0	0	0.0225	0	0	0	0	0	0	0	0	0
Solyc00g157180	42.2675	Expressed	0.116667	0.0817007	0.193966	0.090312	0.169214	0.143672	0.120312	0.118779	0.125532	0.0958623	0.396745	0.141502	0.259563	0.204832	0.200723	0.17085	0	0.10638	0.343253	0.136221	0.186838	0.124256	0.035	0.0708872	0.0660177	0	0.0451617	0.043589	0.02	0.0303795	0.0275	0.0426956	0	0	0.814376	0.864629	0.17041	0.0221736	0.247824	0.118278	0.16	0.0625	0.0478714	0.0327872	0.1025	0.02529	0.0175
Solyc00g160780	12	Expressed	0.46929	1.09128	0.939157	0.207385	0.256105	0.0889171	0.152315	0.108819	0.0262599	0.0794775	0.0291548	0	0	0	0	0	0.0888819	2.1955	0.187794	0.0851836	0.0567707	0.198997	0.0645981	0.0587367	0.0355903	0.025	0.0325	0	0.02	0	0	0	0.0233333	0.151694	0.166933	0.0335099	0.0375278	0	0.0332603	0.02	0	0	0	0	0	0	0
Solyc00g163580	0.0625		0	0	0	0	0	0	0	0	0	0	0	0	0	0	0	0	0	0	0	0	0	0	0	0	0	0	0	0	0	0	0	0	0	0	0	0	0.0361421	0	0.0275	0	0	0	0	0.0225	0	0	0
Solyc00g164580	3.47667	Expressed	0	0.0225	0.025	0	0.0477842	0.0309233	0.0347311	0.0275	0.0291548	0	0.109268	0.0225	0.0275	0.0275	0.0580768	0.0891978	0	0	0.0348807	0	0	0.0596343	0	0	0.035	0.0287228	0.060329	0.023094	0.0348807	0.00853913	0.0777282	0.0603462	0.0272845	0	0.0471478	0	0.0622328	0.0225	0.0598609	0.04	0.03	0	0.123584	0.0440643	0.0900925	0	0.0462781
Solyc00g164680	88.1367	Expressed	2.6828	0.616838	0.901226	0.717763	0.942519	3.24192	0.854049	1.29581	1.68808	1.38691	0.704681	2.23532	3.8373	1.11693	3.709	1.16102	4.01361	0.135739	1.1625	4.42346	0.521129	1.10728	0.963737	0.529534	1.37578	0.650493	0.954066	0.89514	0.854697	0.693822	2.3882	0.774192	1.40298	0.33126	1.47391	0.945713	1.88365	0.674369	0.683098	1.60194	0.554579	0.697011	1.16002	0.798544	0.620074	1.06722	1.05704
Solyc00g165080	0.0825		0	0	0	0	0	0	0	0	0	0	0	0	0	0	0	0	0	0	0	0	0	0	0	0	0	0	0	0	0	0	0	0	0	0	0	0	0	0.0225	0	0	0.0225	0.0278014	0	0	0	0.0175	0.0175
Solyc00g165090	0.205		0	0	0	0	0	0	0	0	0	0	0	0	0	0	0	0	0	0	0	0	0	0	0	0	0	0	0	0	0	0	0	0	0	0	0	0	0	0.0225	0.045	0.04	0.0291548	0.025	0	0	0.035	0	0.02
Solyc00g165190	0.0275		0	0	0	0	0	0	0	0	0	0	0	0	0	0	0	0	0	0	0	0	0	0	0	0	0	0	0	0	0	0	0	0	0	0	0	0	0	0	0	0	0	0.0275	0	0	0	0	0
Solyc00g166190	0		0	0	0	0	0	0	0	0	0	0	0	0	0	0	0	0	0	0	0	0	0	0	0	0	0	0	0	0	0	0	0	0	0	0	0	0	0	0	0	0	0	0	0	0	0	0	0
Solyc00g166490	0.545		0.04	0	0.025	0.0249583	0.0919579	0.0225	0.0225	0.0615596	0.0275	0	0	0	0	0	0.03	0	0	0	0.0303795	0.0288675	0.0432772	0.0558271	0.03	0.0337577	0	0	0	0	0	0	0.0275	0.025	0	0	0	0.0275	0	0	0	0	0	0	0	0	0	0	0
Solyc00g166690	0.05		0	0	0	0	0	0	0	0	0	0	0	0	0.03	0	0	0	0	0	0	0	0.0275	0	0	0	0	0	0	0	0	0	0	0	0	0	0	0	0	0	0	0	0	0.0325	0	0	0	0	0
Solyc00g167290	0		0	0	0	0	0	0	0	0	0	0	0	0	0	0	0	0	0	0	0	0	0	0	0	0	0	0	0	0	0	0	0	0	0	0	0	0	0	0	0	0	0	0	0	0	0	0	0
Solyc00g167300	0		0	0	0	0	0	0	0	0	0	0	0	0	0	0	0	0	0	0	0	0	0	0	0	0	0	0	0	0	0	0	0	0	0	0	0	0	0	0	0	0	0	0	0	0	0	0	0
Solyc00g167800	0.05		0	0	0	0	0	0	0	0	0	0	0	0	0	0	0	0	0	0	0	0	0	0	0	0	0	0	0	0	0	0	0	0	0	0	0	0.03	0	0	0	0	0	0	0	0	0	0	0
Solyc00g168200	12.5375	Expressed	0.12252	0.405244	0.231566	0.319713	0.324869	0.166652	0.387672	0.240936	0.468419	0.537794	0.624198	0.202896	0.159602	0.205604	0.153677	0.115794	0	0.275511	0.176181	0.535833	0.724872	0.416181	0.300233	0.568454	0.224648	0.317661	0.143723	0.0885532	0.0512144	0.1879	0.161271	0.228291	0.0655744	0	0.595684	0.622696	0.817184	0.876711	0.646495	0.198683	0.412581	0.624373	0.587259	0.0797261	0.102987	0.0949122	0.0290115
Solyc00g170200	8.67333	Expressed	1.76496	0.0444175	0.0730725	0	0	0.0225	0.0475	0	0	0.0325	0	0	0	0	0.0225	0	0.165025	0.0860233	0	0	0	0	0	0.025	0	0.025	0.02	0	0	0.0425	0	0	0.265477	0.292062	0	0.03	0	0.02	0	0	0	0	0	0	0	0	0
Solyc00g170210	129.14	Expressed	4.26906	1.74298	1.00258	1.42213	0.489583	0.477587	0.167898	0.602555	0.58818	0.636979	0.605427	0.427812	0.368511	0.289554	0.893685	0.388512	3.5072	0.88351	1.18356	0.583329	0.824574	0.280089	1.02463	0.554542	0.51388	0.684341	0.611615	0.500816	0.361971	0.114991	0.443978	0.687779	8.98973	3.27628	0.726716	0.809942	0.526852	0.325227	0.297741	0.454099	0.27636	0.23771	0.936753	0.672124	0.137803	0.870128	0.67696
Solyc00g170510	45.655	Expressed	0	0.1068	0.025	0.067992	0	0	0	0	0	0	0	0	0	0	0	0	0	0.587117	0.131339	0.316373	0	0	0	0	0	0	0	0	0	0	0	0	0	0	0.259948	0.627686	0	0	0	0	0	0	0	0	0	0	0
Solyc00g171710	0.445		0.04	0.0246221	0	0.0253311	0	0	0	0	0	0.0325	0	0	0	0.035	0	0.09	0.07	0.0280995	0.0225	0	0	0	0	0	0	0	0	0	0	0	0	0.0125	0.0466667	0	0.025	0	0.0325	0.0262996	0.0225	0	0	0	0.0275	0	0	0	0
Solyc00g171810	97.375	Expressed	0.126623	1.20367	0.211994	1.1861	0.621576	0.383653	0.211837	0.214219	0.241674	0.399799	0.29936	0.153317	0.206902	0.0597216	0.235248	0.499416	0.4933	2.13988	0.317359	0.709654	0.471529	0.14026	0.370068	0.211088	0.287587	0.344625	0.343681	0.20914	0.162327	0.387951	0.19461	0.637247	0.112596	1.40302	0.268002	0.217121	0.147443	0.152991	0.272806	0.119957	0.115794	0.61821	0.207143	0.12951	0.391578	0.413227	0.215368
Solyc00g172410	1.1175	Expressed	0	0	0	0	0	0	0	0.03	0	0	0	0.025	0.0275	0	0.025	0	0	0	0.0225	0	0	0	0	0	0	0	0	0.02	0	0	0	0	0	0	0.02529	0	0	0	0.0275	0	0.0275	0.0325	0	0	0	0	0
Solyc00g173430	0.0225		0	0	0	0	0	0	0	0	0	0	0	0	0	0	0	0	0	0	0	0	0	0	0	0	0	0	0	0	0	0	0	0	0	0	0	0	0	0.0225	0	0	0	0	0	0	0	0	0
Solyc00g174330	6253.95	Expressed	0	0.0446047	0.191898	22.9355	4.54795	15.4839	53.239	39.0996	224.084	118.82	77.322	12.8677	15.5934	18.987	3.22075	3.4742	0	0.21418	0.242109	6.15102	6.20035	2.71895	3.46872	1.87798	2.11428	4.63239	3.21487	24.4289	23.1537	18.1495	2.49247	0.173656	0.03	0	20.3933	57.257	23.7147	0.95581	0.694843	0.123988	1.5484	0.799045	1.36868	0.695354	0.645773	6.66308	0.249433
Solyc00g174340	6438.89	Expressed	0	0.0579511	0.163114	29.8014	7.79623	28.1887	100.781	69.3407	399.051	209.501	127.868	22.9628	22.5648	32.0384	5.54177	5.4251	0	0.204262	0.214437	7.98663	12.0151	4.51659	6.09184	3.43297	3.27037	7.47837	5.32751	44.0291	33.6586	33.3394	4.48191	0.267842	0.03	0	27.0724	86.2327	44.3653	2.10947	0.974486	0.25752	2.9226	0.666726	2.31102	1.29552	0.911504	11.2708	0.545304
Solyc00g175240	0.16		0	0	0	0	0	0	0	0	0	0	0	0	0	0	0	0	0	0	0	0	0	0	0	0	0	0	0	0	0	0	0	0	0	0	0	0	0	0	0.0225	0	0	0.0325	0	0	0	0	0
Solyc00g178340	1.795	Expressed	0	0	0	0.0225	0	0	0	0	0	0	0	0	0	0	0	0	0	0	0.0275	0.025	0.025	0	0	0.035	0	0.0881641	0	0	0	0.0275	0.0275	0.0125	0	0	0	0	0	0.02	0.0442295	0.0280995	0	0.0275	0.025	0	0.0275	0	0
Solyc00g179240	0.155		0.075351	0.044441	0	0	0	0	0	0	0	0	0	0.025	0	0	0	0	0	0.0225	0	0	0	0	0	0	0	0.03	0.035	0	0	0	0	0	0	0	0	0	0.03	0	0	0	0	0	0	0	0	0	0
Solyc00g179640	13.8025	Expressed	0.03	0.822709	0.0517204	0.116431	0.0819934	0.0225	0.035	0.0332603	0	0	0.0596343	0.0636887	0.0259808	0.0891978	0.034641	0.0273861	0	0.195491	0.202587	0.121724	0.0566238	0.03	0.0911386	0.03	0	0.0244949	0	0	0.035	0.0320156	0	0.0475	0.116667	0.0433333	0.640148	0.156758	0.06	0.0425	0.0537548	0	0	0.431065	0	0.0540062	0.0325	0.0994987	0.0563286
Solyc00g179840	0.0666667		0	0	0	0	0	0	0	0	0	0	0	0	0	0	0	0	0	0	0	0	0	0	0	0	0	0	0	0	0	0	0	0	0	0	0	0	0	0	0	0	0	0	0	0	0	0	0
Solyc00g180440	0.045		0	0	0	0	0	0	0	0	0	0	0	0	0	0	0	0	0	0.0225	0	0	0.025	0	0	0	0	0	0	0	0	0	0	0	0	0	0	0	0	0	0	0	0	0	0	0	0	0	0
Solyc00g180840	3.34333	Expressed	0	0	0	0	0	0	0	0	0	0	0	0	0.0275	0	0	0	0	0.0110868	0.111682	0	0	0	0	0	0	0	0	0	0	0	0	0	0	0	0.0833042	0.10781	0	0	0.045	0	0	0	0	0	0	0	0
Solyc00g181240	0.77		0	0.0225	0.03	0.0303795	0.0590727	0.064727	0	0.0275	0.0291548	0.0337577	0.0225	0.0225	0	0.03	0.0309233	0.03	0	0.04	0.118278	0	0.0325	0.03	0.0361421	0.03	0.0404145	0.03	0	0.04272	0	0.0320156	0.107121	0.0952628	0.03	0	0.025	0	0.0325	0.0225	0.0332603	0	0.0495606	0.0275	0.0601907	0.0927699	0.0534439	0.0367423	0.02
Solyc00g181250	1.7075	Expressed	0	0	0	0.0225	0	0.0225	0	0	0	0	0.03	0	0	0	0	0	0	0	0	0	0	0	0.035	0	0	0	0	0.02	0	0	0	0.0225	0	0	0	0.0291548	0	0	0.025	0	0.025	0	0.0638357	0.02	0.0332603	0	0.0367423
Solyc00g183050	1.2775	Expressed	0.0933333	0.0694622	0.066505	0.0492231	0.130032	0.0776075	0.0492443	0.139067	0.109725	0.0790042	0.206534	0.0982662	0.129775	0.058648	0.139523	0.0513971	0	0.0453459	0.0475	0.0813429	0.0730725	0.133104	0.0904157	0.0839643	0.158798	0.134691	0.144366	0.124432	0.0980115	0.118207	0.0342479	0.197041	0	0	0.02529	0.0476751	0.0566422	0.0804544	0.0821077	0.0290115	0.0545245	0.0969858	0.115866	0.0347311	0.113459	0.0733002	0.105386
Solyc00g183550	0.05		0	0.0325	0	0	0	0	0	0	0	0	0	0	0	0	0	0	0	0	0	0	0	0	0	0	0	0	0	0	0	0	0	0	0	0	0	0	0	0	0	0	0	0.0275	0	0	0	0	0
Solyc00g184350	6.8725	Expressed	0.93117	0.248843	0.201453	0.196511	0.306662	0.549065	0.502384	0.254702	0.513534	0.37604	0.276176	0.265279	0.366447	0.256824	0.213673	0.176747	0.363333	0.208567	0.226808	0.333542	0.154731	0.202993	0.471054	0.491755	0.610444	0.508665	0.560929	0.195895	0.589963	0.265957	0.0827144	0.485822	0.462793	0.098714	0.284176	0.632647	0.267535	0.202998	0.454615	0.323995	0.523424	0.195208	0.484258	0.542694	0.375863	0.412068	0.335522
Solyc00g185750	0.025		0	0	0	0	0	0	0	0	0	0	0	0	0	0	0	0	0	0	0	0	0	0	0	0	0	0	0	0	0	0	0	0	0	0	0	0	0	0	0	0	0	0	0	0	0	0	0
Solyc00g185850	0.025		0	0	0	0	0	0	0	0	0	0	0	0	0	0	0	0	0	0	0	0	0	0	0	0	0	0	0	0	0	0	0	0	0	0	0	0	0	0	0	0	0	0	0	0	0	0	0
Solyc00g186050	0.733333		0.0731057	0	0	0.0275	0.0325	0	0.0644205	0	0	0	0.0275	0.0259808	0	0	0	0	0.0666667	0.04	0.0561805	0.0303795	0.0275	0.03	0.0325	0.035	0	0	0.035	0	0.02	0.0275	0	0	0.276827	0.112891	0	0	0	0.0262996	0.025	0.02	0.025	0	0	0.0225	0.035	0.025	0.0175
Solyc00g187050	92.1775	Expressed	0.427798	8.78198	3.35841	0.930045	0.21888	0.191725	1.42728	1.18363	0.311462	0.618956	1.75626	0.583709	0.315397	0.0554339	0.0872138	0.03	0.182696	7.54892	2.18461	0.200889	1.0855	0.183258	0.807737	0.678202	0.168789	0.279374	0.337796	0.190832	0.112953	0.26522	0.056032	0.0619644	0.329157	0.217281	7.61472	2.06638	0.484355	0.12612	0.118559	0.175831	0.0625	0.219065	0.180393	0.27822	0.297444	0.07099	0.118348
Solyc00g188250	1.19333	Expressed	0.111405	0.0660019	0.03937	0.0193111	0.0722697	0.064727	0.0599131	0.0410284	0.0592136	0.0514782	0.0340343	0.0275	0.0342783	0.045	0.034641	0.03	0.0333333	0.02	0.0279881	0.0830161	0.0739932	0.0309233	0.07099	0.025	0.0390246	0.0500625	0.0667083	0.0225	0.02	0.0262996	0.0275	0.0125	0.0933333	0	0.05	0.0515388	0.0325	0.0495606	0.045	0.0225	0	0	0	0.0225	0	0	0
Solyc00g188750	0.0225		0	0	0	0	0	0	0	0	0	0	0	0.0225	0	0.0225	0.0225	0	0	0	0	0	0	0	0	0	0	0	0	0	0	0	0	0	0	0	0	0	0	0	0	0	0	0	0	0	0	0	0
Solyc00g188850	0.115		0	0	0	0	0	0	0	0	0	0	0	0	0	0	0	0	0	0	0	0	0	0	0	0	0	0	0	0	0	0	0	0	0	0	0.035	0	0	0	0	0	0	0	0	0	0	0	0
Solyc00g192150	0.0675		0	0	0	0	0	0	0	0	0	0	0	0	0	0	0	0	0	0	0	0	0	0	0	0	0	0	0	0	0	0	0	0	0	0	0	0	0	0	0.0275	0	0	0	0	0	0	0	0
Solyc00g195350	1.8375	Expressed	0	0.0225	0	0.0225	0	0	0	0	0	0	0	0.0225	0.0375	0.0347311	0.128347	0.0464354	0	0.02	0	0	0	0	0	0	0	0	0	0.0505594	0.0932179	0.0425	0.0703562	0.158008	0	0	0.035	0	0	0	0	0	0.0881641	0.125855	0.0303795	0.220492	0.212539	0.302021	0.0570088
Solyc00g195360	3.255	Expressed	0	0.0525	0.0558271	0	0	0	0	0.0275	0	0	0	0.0430842	0.0424264	0.09123	0.128347	0.135547	0	0.0388104	0.0627661	0.0471478	0	0	0	0	0	0	0	0.0442295	0.112027	0.0801561	0.137682	0.149944	0	0	0.025	0	0	0	0	0	0.090967	0.192889	0.025	0.455382	0.284985	0.367931	0.0662539
Solyc00g196060	83.0675	Expressed	0.0633333	4.3588	6.86574	1.48804	3.26802	1.16026	2.30209	2.72681	2.83428	0.519944	1.79994	1.38575	1.74676	1.12929	1.908	1.17191	0.981993	4.40282	7.06609	1.46765	1.28855	2.56265	3.91038	2.04737	2.14685	2.06722	1.67032	0.943728	2.4366	1.07495	1.35766	4.1686	0.245153	0.0633333	1.66998	1.85984	1.81104	1.14001	2.91218	2.60195	0.523106	2.45859	1.74918	1.70005	1.59891	0.382565	0.760334
Solyc00g196460	0.09		0	0.0660808	0	0	0	0	0	0	0	0	0	0	0.03	0	0	0.0275	0	0	0	0	0	0	0	0	0	0.025	0	0	0	0	0	0	0	0	0.0175	0	0	0	0.0225	0	0	0.0348807	0	0	0	0	0
Solyc00g198360	0.055		0	0	0	0	0	0	0	0	0	0	0	0	0	0	0	0	0	0	0	0	0	0	0	0	0	0	0	0	0	0	0	0	0	0	0.0175	0	0	0	0	0	0	0	0	0	0	0	0
Solyc00g199960	0.0275		0	0	0	0	0	0	0	0	0	0	0	0	0	0	0	0	0	0	0	0	0	0	0	0	0	0	0	0	0	0	0	0	0	0	0	0	0	0	0	0	0	0	0	0	0	0	0
Solyc00g201060	0.175		0	0	0	0	0	0	0	0	0	0	0	0	0	0	0	0	0	0	0	0	0	0	0	0	0	0	0	0	0	0	0	0	0	0	0	0	0	0	0	0	0	0	0	0	0	0	0
Solyc00g201160	3.0375	Expressed	0.04	0.0325	0.0225	0	0	0.131783	0.125433	0.0814964	0.470007	0.272347	0.0398696	0.0525991	0.185158	0.170801	0.106027	0.0755397	0.0333333	0.0325	0.0475	0.0275	0	0.03	0	0.025	0.025	0.0500625	0.0537548	0.187661	0.0990265	0.0518813	0.0275	0.0355903	0.22053	0.0333333	0.111131	0.0667083	0.0361421	0	0	0.02	0	0.025	0	0.0404918	0.0275	0	0
Solyc00g201460	0.0525		0	0	0	0	0	0	0	0	0	0	0	0	0	0	0	0	0	0	0	0	0	0	0	0	0	0	0	0	0	0	0	0	0	0	0	0	0	0	0	0	0	0	0	0	0	0	0
Solyc00g201760	0.0325		0	0	0	0	0	0	0	0	0	0	0	0	0	0	0	0	0	0	0	0	0	0	0	0	0	0	0	0	0	0	0	0	0	0	0	0	0	0	0	0	0	0	0	0.0325	0	0	0
Solyc00g202560	0.09		0	0	0	0	0	0	0	0	0	0	0	0	0	0	0	0	0	0	0	0	0	0	0	0	0	0	0	0	0	0	0	0	0	0	0	0	0	0	0	0	0	0	0	0	0	0	0
Solyc00g203660	0.59		0	0.121415	0.0275	0.0275	0.0325	0	0	0.0325	0	0	0	0	0	0	0	0.0225	0	0.0506623	0.0303795	0.0275	0	0	0	0	0	0	0	0	0	0	0	0	0	0.0433333	0.0314576	0	0	0	0.0275	0	0	0.0325	0	0.0225	0	0	0
Solyc00g206460	1465.78	Expressed	11.2958	2.48256	1.46586	1.08026	1.13131	12.427	6.22142	1.07688	14.1846	4.4945	2.48754	4.21937	1.44085	0.100115	1.48516	0.626915	10.0202	4.16308	1.3072	0.304822	0.492466	5.84505	2.22202	0.496158	8.74278	2.2885	1.54241	3.49482	1.67047	0.20166	1.6386	0.949645	77.9828	23.8158	3.66864	5.06561	5.18714	14.1678	5.27994	1.65212	6.56577	1.82718	1.54607	4.47866	1.06514	0.166858	3.95653
Solyc00g207960	6.57	Expressed	0	0	0	0.025	0.195422	0.158771	0.265393	0.358408	0.204002	0.163012	0.118137	0.0612883	0.0246221	0.0497284	0.0925	0	0	0	0.0325	0.0906803	0.112138	0.17867	0.128865	0.483328	0.31297	0.282087	0.560216	0.131719	0.0289756	0.0839643	0.0275	0	0	0	0	0.123322	0.15072	0	0	0.0383786	0	0.0646787	0	0	0	0	0
Solyc00g209460	8.51667	Expressed	0.233333	0.0352077	0.0896637	0.126976	0.0347311	0.0722265	0.0204124	0.114118	0.102307	0.0798305	0.1187	0.0204124	0.130982	0.0796215	0.114601	0.109583	0.396667	0.0845084	0.108972	0.0430842	0.0733002	0.0259406	0.0942072	0.00853913	0.0989949	0.127892	0.0614241	0.074652	0.0882586	0.0623665	0.00629153	0.0603462	0.620242	0.501874	0.10499	0.0684349	0.0827647	0.0690863	0.079425	0.0841006	0.137924	0.0887295	0.151767	0.105554	0.0589315	0.0525198	0.0643558
Solyc00g209560	8.49	Expressed	0.193333	0.0638357	0.132185	0.114127	0.0347311	0.0632949	0.0362859	0.114118	0.093039	0.0798305	0.1187	0.0204124	0.114237	0.0607419	0.122848	0.122704	0.23	0.101766	0.0893845	0.0430842	0.0818917	0.0259406	0.0744983	0.00853913	0.0989949	0.115686	0.0614241	0.0889757	0.0882586	0.0392375	0.0284312	0.0603462	0.547307	0.541859	0.111131	0.0684349	0.0827647	0.0690863	0.079425	0.0841006	0.121861	0.0788855	0.129711	0.105554	0.0589315	0.0525198	0.0653676
Solyc00g210860	2.215	Expressed	0	0	0.025	0.05	0	0	0	0	0.0275	0	0	0	0	0	0	0.0543139	0.03	0.0497494	0	0	0	0	0.0325	0.0575	0	0.025	0.0340343	0.0259808	0.02	0	0	0.035	0	0	0.025	0	0.0325	0	0.0225	0	0	0.03	0.0892912	0.065	0.0572094	0	0.0475
Solyc00g212260	79.6775	Expressed	0	0	0.0822977	0.0865544	0	0	0.0325	0	0	0	0	0.025	0	0	0.03	0	0	0.0388104	0.283034	0.361974	0.0990265	0	0	0	0	0	0	0	0	0	0	0	0	0	0.395777	0.612733	0.152991	0	0.045	0.0275	0	0.025	0	0	0.0638357	0	0
Solyc00g213960	0.0525		0	0	0	0	0	0	0	0	0	0	0	0	0	0	0	0	0	0	0	0	0	0	0	0	0	0	0	0	0	0	0	0	0	0	0	0	0	0	0	0.0275	0	0	0	0	0	0	0.02
Solyc00g215560	1.865	Expressed	0	0.0275	0.0309233	0.0288675	0.0453459	0.0698212	0.083504	0.0273861	0.100031	0.0777817	0.0671286	0.10053	0.0822977	0.0768521	0.109116	0.0683587	0	0.0425	0.0225	0.0725718	0.0513971	0.066458	0.0261406	0.115072	0.0896289	0.0623832	0.231206	0.0941962	0.0865544	0.0268871	0.0895358	0.0861564	0	0	0.0295452	0.0860596	0.133627	0.122364	0.230809	0.120173	0.100198	0.118392	0.215344	0.175897	0.129422	0.16992	0.110378
Solyc00g217560	0.07		0	0	0	0	0	0	0	0	0	0	0	0	0	0	0	0	0	0	0	0	0	0	0	0	0	0	0	0	0	0	0	0	0	0	0	0	0	0	0	0	0	0	0	0	0	0	0
Solyc00g217960	45.77	Expressed	0.499733	0.260848	0.571145	0.370031	0.22102	0.908308	1.41195	0.9822	1.91843	2.70706	1.41963	0.408768	1.5341	0.729595	1.19312	1.00561	0.570643	0.375167	0.361625	0.508009	0.439628	0.189709	0.457172	0.693235	1.915	1.05841	1.20238	0.805611	1.01446	0.438501	0.303929	0.901521	0.996209	0.144261	0.275318	0.727935	0.495025	0.457939	0.395316	1.03349	0.724114	0.878986	0.829473	0.862791	0.727592	0.521488	1.16806
Solyc00g218560	0.3525		0	0	0	0	0	0	0.065	0.0325	0	0	0	0	0	0	0	0	0	0	0	0	0.0275	0	0	0	0	0	0	0	0	0	0	0	0	0	0	0.0275	0	0	0.0275	0	0	0	0.0625	0	0	0	0
Solyc00g220360	0.0366667		0	0	0	0	0	0	0	0	0	0	0	0	0	0	0	0	0	0	0	0	0	0	0	0	0	0	0	0	0	0	0	0	0	0	0	0	0	0	0	0	0	0	0	0	0	0	0
Solyc00g222060	0.0675		0	0	0	0	0	0	0	0	0	0	0	0	0	0	0	0	0	0	0	0	0	0	0	0	0	0	0	0	0	0	0	0	0	0	0	0	0	0	0	0	0	0	0	0	0	0	0
Solyc00g222460	0.16		0	0	0	0	0.025	0	0.0225	0.0348807	0.0317543	0.0325	0.06	0.045	0.03	0	0	0.0332603	0	0	0.0325	0.025	0	0.03	0	0.07	0	0	0	0.02	0.0666302	0.0275	0.0225	0.0125	0	0	0	0.0291548	0	0.041508	0.0225	0	0.0275	0.0325	0.0500625	0.0259808	0.0348807	0.0504975	0.0376386
Solyc00g226760	49.5775	Expressed	0	0.02	0.0521217	0.0483692	0	0	0	0	0	0	0	0	0	0	0	0	0	0	0.251081	0.336139	0.0463681	0.034641	0	0	0	0	0	0	0	0	0	0	0	0	0.766174	0.498888	0.132563	0	0	0	0	0	0.03	0	0.035	0	0
Solyc00g227860	27.4025	Expressed	1.9691	1.39287	1.19555	0.558517	0.490255	0.633724	1.2151	1.5254	1.07977	1.08414	1.28369	0.399562	0.429387	0.166652	0.272977	0.0804544	1.87356	2.20054	1.84223	1.19829	1.10174	1.01834	0.717407	0.932599	1.0823	0.0273861	1.0557	0.2459	0.155958	0.176794	0.339313	0.248676	4.30275	0.728225	1.22272	1.2257	0.650577	0.922546	0.23648	0.827174	0.528504	0.468888	0.435495	0.1252	0.0764172	0.140971	0.0968999
Solyc00g227960	37.115	Expressed	0	0	0.0521217	0.05	0	0	0	0	0	0	0	0.0225	0	0.0225	0	0	0	0	0.199055	0.264339	0.0458939	0.03	0	0	0	0	0	0	0	0	0	0	0	0	0.603716	0.265141	0.132256	0	0	0	0	0	0	0	0	0	0
Solyc00g228260	0.025		0	0	0	0	0	0	0	0	0	0	0	0	0	0	0	0	0	0	0	0	0	0	0	0	0	0	0	0	0	0	0	0	0	0	0	0	0	0	0	0	0	0	0	0	0	0	0
Solyc00g229260	1.355	Expressed	0	0	0	0	0	0.03	0	0	0	0	0	0	0	0	0	0	0	0	0	0	0.0275	0	0	0	0	0.03	0	0	0	0	0	0	0	0	0.02529	0.0284312	0.0325	0	0.025	0	0.0275	0	0	0.0325	0	0.0225	0
Solyc00g230060	2.3225	Expressed	0.0633333	0.0170171	0.0288675	0	0	0.045	0	0.065	0.0225	0.025	0.045	0.025	0.0309233	0	0.0225	0.0744983	0.06	0.0272336	0.0325	0.0275	0	0.0575	0.065	0	0	0.05	0.0325	0.02	0.0660808	0.0262996	0.0275	0.0228674	0	0	0.0426956	0.055	0.0317543	0.0525	0.045	0	0.0332603	0.0302765	0.153045	0.0612883	0.0295452	0.0234521	0.0262996
Solyc00g230070	7.6675	Expressed	0	0.511882	0.147217	0.449481	0.125988	0.0612883	0.0842986	0.0964797	0.0342479	0.123111	0.0615088	0.0221736	0.0801041	0.128776	0.108886	0.145738	0	0.93217	0.317726	0.0689807	0.0812788	0.0754983	0.0551324	0.0657489	0.042106	0.0590727	0.0392641	0.04272	0.0384057	0	0.0558831	0.0529741	0	0	0.22555	0.147443	0.150409	0.0818026	0.189269	0.0852936	0.066128	0.0442531	0.139903	0.0540062	0.0992786	0.0275	0.068374
Solyc00g230080	17.3075	Expressed	0	0.87695	0.201923	0.73802	0.166983	0.13032	0.208746	0.158765	0.146884	0.19205	0.104483	0.0311916	0.0996975	0.205198	0.111729	0.163267	0	1.3725	0.328811	0.201344	0.138286	0.151733	0.118498	0.0480234	0.0306526	0.0777817	0.0952519	0.0556028	0.0548483	0	0.118348	0.142215	0.03	0	0.346374	0.40573	0.0940301	0.219749	0.189841	0.148064	0.0715309	0.0327554	0.19809	0.0776075	0.103199	0.0264575	0.141797
Solyc00g230280	0.045		0	0	0	0	0	0	0	0	0	0	0	0	0	0	0	0	0	0	0	0	0	0	0	0	0	0	0	0	0	0	0	0	0	0	0	0	0	0	0	0	0	0	0	0	0	0	0
Solyc00g231680	0.1175		0	0	0	0	0.0275	0.0225	0	0	0	0	0.0309233	0	0	0.03	0	0	0	0	0	0	0	0	0	0.03	0	0	0.05	0	0	0	0	0	0	0	0	0	0	0.1025	0	0.02	0.0500625	0.055	0.0320156	0.0545245	0.080247	0.0175	0.0225
Solyc00g231780	6.255	Expressed	0.04	0.0426956	0.0481318	0.0409013	0.0955685	0.0801561	0.0447912	0.0570636	0.0554527	0.140557	0.0636396	0.0606905	0.15248	0.106223	0.0701635	0.0684957	0	0.0545245	0.0494132	0.10781	0.0205649	0.0361421	0.0275	0.0583631	0.0554527	0.189665	0.22336	0.140616	0.214184	0.145337	0.116646	0.104513	0.0566667	0.0833333	0.0471699	0.108819	0.0821584	0.0221736	0.133127	0.0510514	0.0881641	0.111093	0.142624	0.0812788	0.20742	0.0495606	0.0978413
Solyc00g233480	0.76		0	0	0	0.025	0	0.0309233	0	0	0	0	0.0275	0.0225	0	0	0	0	0	0.02	0	0.0303795	0.045	0.0325	0	0.025	0.0325	0.03	0.02	0	0	0.055	0	0	0	0	0	0	0	0	0	0.02	0	0	0	0	0.035	0.0225	0
Solyc00g237680	0.535		0	0	0	0	0	0	0	0	0	0	0	0	0	0	0	0	0	0.0325	0.025	0	0	0	0	0	0	0	0	0	0	0	0	0	0	0	0.05	0.0744284	0	0	0	0	0	0	0	0	0.0275	0	0
Solyc00g240580	0.0333333		0	0	0	0	0	0	0	0	0	0	0	0	0	0	0	0	0.0333333	0	0	0	0	0	0	0	0	0	0	0	0	0	0	0	0	0	0	0	0	0	0	0	0	0	0	0	0	0	0
Solyc00g244280	1.635	Expressed	0.0731057	0.04	0	0.05	0	0	0	0	0	0	0	0	0.0332603	0	0	0.03	0	0	0	0	0	0	0	0.0325	0	0	0	0	0	0.03	0	0	0.133208	0.0458258	0	0	0	0	0.05	0	0.03	0	0.0874047	0.0225	0.0544671	0	0.0390246
Solyc00g244290	23.8275	Expressed	2.84087	0.578028	0.360012	0.249483	0.718662	0.245645	0.211241	0.442399	0.312846	0.23855	0.447595	0.0578072	0.210416	0.295085	0.33856	0.2883	0.150591	0.765249	0.388051	0.697979	0.376098	0.635851	0.479242	0.779204	0.81522	0.149687	0.351414	0.28869	0.464489	0.458339	0.300621	0.40883	1.37548	1.78333	0.993189	0.11926	0.261422	0.241777	0.506777	0.490686	0.226729	0.30434	0.197247	0.374219	0.862332	0.292261	0.36098
Solyc00g244300	18.64	Expressed	1.25839	0.210411	0.39767	0.0927811	0.678532	0.493094	0.204002	0.41582	0.275178	0.157023	0.221034	0.175618	0.158186	0.129446	0.273328	0.20079	0.1	0.262437	0.461393	0.800483	0.151073	0.462322	0.445393	0.713781	0.774371	0.334325	0.538834	0.197669	0.315977	0.281321	0.353483	0.141833	1.657	1.05879	1.17951	0.146458	0.317923	0.241432	0.531891	0.551896	0.293609	0.167829	0.0747635	0.138105	0.17359	0.0628987	0.0645981
Solyc00g245200	0.215		0	0.02	0.03	0.0638357	0	0	0	0	0	0	0	0	0	0	0	0	0	0.0388104	0	0	0	0	0	0	0	0	0	0	0	0	0	0	0	0	0	0.0332603	0	0	0	0	0	0.03	0	0.02	0	0	0
Solyc00g246800	0.0875		0	0	0	0	0	0	0	0	0	0	0	0	0	0	0	0	0	0	0	0	0	0	0	0	0	0	0	0	0	0	0	0	0	0	0	0	0	0	0	0	0	0	0.0590727	0	0.0275	0	0
Solyc00g247300	24.865	Expressed	0	0.0246221	0.0446047	0.472976	1.01447	1.00873	1.65571	0.54943	2.03167	1.12508	1.11563	0.0704006	0.0494975	0.0566238	0.0225	0.0292617	0	0.0246221	0.092826	0.311726	0.297811	2.12465	1.70478	1.38189	1.7769	1.31819	1.02989	0.0225	0.0384057	0.03	0	0.0125	0.18735	0	0.4225	0.713139	0.360541	0.428629	0.432018	0.542592	0	0.0477842	0.0686021	0	0	0.0451848	0.0225
Solyc00g249200	0		0	0	0	0	0	0	0	0	0	0	0	0	0	0	0	0	0	0	0	0	0	0	0	0	0	0	0	0	0	0	0	0	0	0	0	0	0	0	0	0	0	0	0	0	0	0	0
Solyc00g249900	24.0833	Expressed	2.08519	0.228437	0.28909	0.571203	0.535278	0.608364	0.629696	0.335671	0.368112	0.517607	0.56469	0.346732	0.336551	0.468864	0.301607	0.23318	1.60339	0.328085	0.392755	0.49045	0.555988	0.642318	0.876968	0.446904	0.55947	0.506662	0.57458	0.190673	0.248797	0.286429	0.315317	0.336526	2.77849	0.708174	0.326866	0.740004	0.596923	0.549278	0.301455	0.830708	0.117287	0.69519	0.412379	0.319932	0.243152	0.158975	0.671528
Solyc00g249910	4.255	Expressed	0	0.255033	0.233287	0.0699405	0.241467	0.346891	0.192673	0.190132	0.0239792	0.374975	0.584551	0.167102	0.10336	0.201866	0.0863134	0.10339	0	0.329378	0.39067	0.355563	0.520967	0.1252	0.432635	0.169134	0.188922	0.130024	0.271431	0.0618297	0.106966	0.196002	0.135892	0.168597	0	0	0.133502	0.480703	0.364566	0.116512	0.116154	0.419315	0.109116	0.143839	0.086446	0.0404918	0.0893495	0.0931844	0.0363719
Solyc00g254110	0		0	0	0	0	0	0	0	0	0	0	0	0	0	0	0	0	0	0	0	0	0	0	0	0	0	0	0	0	0	0	0	0	0	0	0	0	0	0	0	0	0	0	0	0	0	0	0
Solyc00g254910	28.39	Expressed	0	0.02	0.0286865	0.0601907	0.0290115	0.119609	0.118559	0.114264	0.103481	0.0619644	0.0942846	0.11912	0.0292617	0.0982344	0.0337577	0.115	0.075351	0.0547723	0.0521816	0.0517003	0.0754431	0.0678694	0.111654	0.115353	0.0601907	0.182254	0.0158114	0.084113	0.030104	0.0768115	0.0275	0.0275	0.116667	0	0.601032	0.305587	0.0797261	0.259487	0.231048	0.0806613	0.025	0.100364	0.0510514	0.0225	0	0.0225462	0
Solyc00g255510	1	Expressed	0	0.0225	0.0225	0	0	0	0.0225	0	0.0275	0	0	0.0225	0.0225	0	0	0	0	0.0291548	0	0	0	0	0	0	0	0	0	0	0	0	0	0	0	0.165025	0.05	0	0	0	0	0	0	0	0	0.02	0	0	0
Solyc00g256710	10.635	Expressed	0	0.457719	0.310279	0.121749	0.271888	0.74533	0.632857	0.49854	0.708783	0.301866	0.300569	0.0450925	0.95382	0.457044	0.437938	0.221397	0	0.252236	0.531868	0.526219	0.298367	0.226826	0.735599	0.630692	0.481774	0.28801	0.414669	0.228674	0.518097	0.432211	0.262679	0.466887	0	0	0.192673	0.649864	0.5384	0.464668	0.284751	0.64489	0.181682	0.186877	0.297696	0.385951	0.299611	0.469965	0.140912
Solyc00g257110	0.695		0.04	0.0959166	0.0423035	0.05	0.0275	0.0309233	0.0225	0.07565	0.045	0.0325	0.0225	0.025	0.045	0.0225	0.0320156	0.0225	0	0.0526783	0.0675	0.0754293	0	0.0309233	0.0325	0.065	0	0	0.05	0	0	0.0320156	0.0525	0.0275	0	0.0272845	0.116261	0.0561805	0.03	0.0733002	0.0275	0.0225	0.0275	0.0593015	0.0278014	0.0327872	0	0.0275	0.0375
Solyc00g263210	0.176667		0.112151	0	0	0	0	0	0	0	0	0	0	0	0	0	0	0	0.0333333	0	0	0	0	0	0	0	0	0	0	0	0	0	0	0	0	0	0	0	0	0	0	0	0	0	0	0	0	0	0
Solyc00g265110	31.7533	Expressed	1.44668	0.56164	0.501282	0.516075	0.106536	0.207981	0.537564	0.170703	0.0377492	0.180664	0.346386	0.030104	0.328887	0.189583	0.138044	0.262202	2.875	0.232428	0.32844	0.381212	0.0261406	0.204328	0.179095	0.254505	0.355466	0.0953939	0.377632	0.137014	0.0688598	0.15845	0.0658913	0.0887881	0.730533	0.484608	0.135093	0.0965553	0.277639	0.431634	0.388273	0.240295	0.103793	0.0212132	0.251541	0.123178	0.193735	0.0883648	0.0788458
Solyc00g265510	2.215	Expressed	0.0633333	0	0	0.0225	0	0	0	0	0	0	0	0	0.0225	0	0	0	0.03	0	0	0	0.00853913	0.0552834	0.0638357	0	0	0	0	0	0	0	0	0	0.03	0	0	0.0953065	0.316873	0.0521816	0.095219	0.0319831	0	0	0	0	0	0	0
Solyc00g266110	0.3725		0	0	0	0	0	0	0	0	0.0275	0.0325	0	0	0	0.045	0	0	0	0	0.0225	0	0	0	0	0.03	0	0	0	0	0	0	0	0	0	0	0.025	0.0451848	0	0	0	0	0	0.025	0	0	0	0	0
Solyc00g268310	0		0	0	0	0	0	0	0	0	0	0	0	0	0	0	0	0	0	0	0	0	0	0	0	0	0	0	0	0	0	0	0	0	0	0	0	0	0	0	0	0	0	0	0	0	0	0	0
Solyc00g269810	0.0333333		0	0	0	0	0	0	0	0	0	0	0	0	0	0	0	0	0	0	0	0	0	0	0	0	0	0	0	0	0	0	0	0	0	0	0	0	0	0	0	0	0	0	0	0	0	0	0
Solyc00g270510	0.075		0	0	0	0	0	0	0	0	0	0	0	0	0	0	0.025	0	0	0	0	0	0	0	0	0	0	0	0	0	0	0	0	0	0	0	0	0	0	0	0	0	0	0	0	0	0	0	0.02
Solyc00g272810	6.57	Expressed	3.02725	0.166852	0.703829	0.253225	0.14665	0.0797261	0.165	0.137538	0.0455293	0.0025	0.147613	0.188696	0.0317214	0.13778	0.0815858	0.075111	0.56	0.180664	0.195507	0.47047	0.0640963	0.0309233	0.0733002	0.0489898	0.0342479	0.025	0.0325	0.191066	0.0675154	0.0566422	0.0549242	0.0379418	0.054569	0.0433333	0.0275379	0.0476751	0.106966	0.0855375	0	0.02	0.0334166	0.025	0.0492231	0.0877852	0.237522	0.0968999	0.157533
Solyc00g273110	52.3075	Expressed	0.113578	0.360682	0.504387	0.632251	1.45466	0.189561	0.728366	1.79989	1.48058	1.04764	1.38693	0.232177	0.366356	0.758797	0.405244	0.672574	0.0881917	0.194701	0.340205	4.86118	3.3355	1.49129	2.81538	0.460242	1.34052	1.40832	2.2365	1.01061	0.757468	0.842025	0.353294	0.828144	0.206101	0.189766	0.635898	2.039	1.46456	1.40743	1.38793	1.77944	0.249433	0.465982	0.898419	0.124298	0.488729	0.331235	0.453817
Solyc00g275310	0.11		0	0.0325	0	0	0	0.03	0	0	0	0	0	0	0	0	0	0	0	0.0225	0	0	0	0	0	0	0	0	0	0	0	0	0	0	0	0	0	0	0	0	0	0	0	0	0	0	0	0	0
Solyc00g277510	19.7775	Expressed	0	0.46029	0.465663	1.60377	0.416421	0.190984	0.203239	0.159289	0.183774	0.138947	0.285511	0.390947	0.17466	0.119818	0.47093	0.264213	0	1.5429	0.694196	0.375788	0.0946485	0.131972	0.264102	0.209339	0.114191	0.0390246	0.0925	0.113017	0.0843603	0.0911958	0.0617117	0.255424	0	0	0.826282	0.308177	0.143585	0.213985	0.284792	0.0866987	0.168393	1.0176	0.172113	0.23855	0.0670044	0.129124	0.16065
Solyc00g278110	0.2175		0	0.0388104	0	0.025	0	0	0	0.0275	0	0	0.03	0	0	0	0.0225	0.03	0	0	0.0275	0	0	0	0	0	0.0325	0.0320156	0	0.045	0	0.0575	0.03	0.0473242	0	0	0	0	0	0	0	0	0.0225	0.0895824	0.025	0.0319831	0	0	0.0175
Solyc00g280110	0.555		0	0	0	0	0	0	0	0	0	0	0	0	0	0	0	0	0	0.02	0.0253311	0.0409013	0.025	0	0.0575	0.0325	0	0.015	0	0	0	0	0	0	0	0	0.0205649	0.119617	0.0833042	0.0900925	0.025	0.116369	0	0	0	0	0	0	0
Solyc00g281110	1.645	Expressed	0.03	0.0246221	0.025	0.0428904	0.0325	0.0589491	0.0225	0.0532877	0.0317543	0.0672062	0.0273861	0.0225	0.0309233	0.035	0.0382971	0.0590727	0	0.0327872	0.0475	0.0259808	0.0327872	0.03	0.0377492	0.0675154	0.0160078	0.0057735	0.0355903	0.0620987	0.0285774	0.0422295	0.0593015	0.0298608	0	0.0366667	0.0280995	0.0890693	0.0334166	0.125192	0.112324	0.0891043	0.0455293	0.0658281	0.0666302	0.0217945	0.0672526	0.0175	0.0920598
Solyc00g282510	26.92	Expressed	0	0.0834041	0.283413	0.24486	0.189489	0.339273	1.05573	0.50909	2.17439	1.32828	0.566221	0.911341	0.761176	1.31013	0.228674	0.71215	0	0.113459	0.107345	0.0771362	0.41764	0.860991	0.489021	0.50927	0.6397	0.377058	0.500416	0.671979	0.45573	0.901058	0.19581	0.292329	0.0762306	0	0.156651	0.218727	0.12893	0.195064	0.27997	0.200852	0.509107	0.279922	0.589109	0.0874643	0.170929	0.238795	0.0728583
Solyc00g283010	0.075		0	0	0	0	0	0	0	0	0	0	0	0	0	0	0	0	0	0	0	0	0	0	0	0	0	0	0	0	0	0	0	0	0	0	0	0	0	0	0	0	0.0225	0	0	0	0.035	0.0225	0
Solyc00g283110	2.76	Expressed	1.1239	0.0423035	0.0225	0.0291548	0.0275	0	0.035	0	0.0275	0	0.0225	0.0505594	0.0291548	0.0552834	0.0225	0	0.332282	0.0225	0.0275	0.0317543	0.025	0	0.0325	0.025	0	0.0288675	0	0.02	0	0.05	0	0.025	0.149926	0.168259	0.0375	0.0332603	0	0.0525	0.03	0	0.025	0.0278014	0	0	0	0.0303795	0
Solyc00g284510	0.0775		0	0	0	0	0	0	0	0	0	0	0	0	0	0	0	0	0	0	0	0	0	0	0	0	0	0	0	0	0	0	0	0	0	0	0	0	0.0325	0	0	0	0	0	0	0	0	0	0
Solyc00g286010	0		0	0	0	0	0	0	0	0	0	0	0	0	0	0	0	0	0	0	0	0	0	0	0	0	0	0	0	0	0	0	0	0	0	0	0	0	0	0	0	0	0	0	0	0	0	0	0
Solyc00g286020	0		0	0	0	0	0	0	0	0	0	0	0	0	0	0	0	0	0	0	0	0	0	0	0	0	0	0	0	0	0	0	0	0	0	0	0	0	0	0	0	0	0	0	0	0	0	0	0
Solyc00g286030	0		0	0	0	0	0	0	0	0	0	0	0	0	0	0	0	0	0	0	0	0	0	0	0	0	0	0	0	0	0	0	0	0	0	0	0	0	0	0	0	0	0	0	0	0	0	0	0
Solyc00g287330	0.1325		0	0	0	0	0	0	0	0	0	0	0	0	0.0225	0	0	0	0	0	0	0	0	0	0	0.03	0	0	0	0.045	0	0.0275	0	0	0	0	0	0	0	0	0	0	0	0	0.0332603	0	0	0	0.02
Solyc00g289230	3.535	Expressed	0	0.0225	0.0510514	0.0789515	0.111841	0.125466	0.0946044	0.0380789	0.192657	0.288079	0.0949122	0.169969	0.179786	0.0570088	0.0956012	0.103873	0	0.195299	0.0933073	0.0720388	0.084113	0.03	0	0.0325	0.0657489	0.0447912	0.0390246	0.0751665	0.0518813	0.11	0.0479583	0.0285774	0.431135	0	0.183189	0.25339	0.248881	0.0961336	0.252422	0.19011	0.103068	0.106027	0.0792675	0.0878446	0.0390246	0.0375	0.0520216
Solyc00g294230	0.24		0	0.0225	0	0	0.0337577	0.0736405	0.0325	0.0317543	0.0225	0.095	0.0275	0.0575	0.03	0	0.03	0.03	0	0	0.025	0.0259808	0.0348807	0.0575	0.0366003	0.03	0.05	0	0.0425	0.0246221	0.085	0.025	0	0	0	0	0	0	0	0.0433013	0.0433013	0.0246221	0.0480451	0.0325	0	0.02	0	0	0.0217466
Solyc00g294630	0.035		0	0	0	0	0	0	0	0	0	0	0	0	0	0	0	0	0	0	0	0	0	0	0	0	0	0	0	0	0	0	0	0	0	0	0	0	0	0	0	0	0	0	0	0	0	0	0
Solyc00g297330	0.0175		0	0	0	0	0	0	0	0	0	0	0	0	0	0	0	0	0	0	0	0	0	0	0	0	0	0	0	0	0	0	0	0	0	0	0	0	0	0	0	0	0	0	0	0	0	0	0
Solyc00g300430	0.04		0	0	0	0	0	0	0	0	0	0	0	0	0	0	0	0	0	0	0	0	0	0	0	0	0	0	0	0	0	0	0	0	0	0	0	0	0	0	0	0	0	0	0	0	0	0	0
Solyc00g300730	0.09		0	0.0225	0	0	0	0.0325	0	0	0	0	0	0	0	0	0	0	0.09	0	0	0	0	0	0	0	0	0	0	0	0	0	0	0	0	0	0.025	0	0	0	0	0	0	0	0.025	0	0	0	0
Solyc00g303630	0.415		0	0	0	0.0225	0	0	0	0	0	0	0	0	0	0	0	0	0	0.0225	0.0327872	0.08	0	0	0	0	0.0325	0	0	0	0	0	0	0	0	0	0	0.0275	0.03	0	0	0	0.0275	0	0	0	0	0	0
Solyc00g304030	0.0333333		0	0	0	0	0	0	0	0	0	0	0	0	0	0	0	0	0	0	0	0	0	0	0	0	0	0	0	0	0	0	0	0	0	0	0	0	0	0	0	0	0	0	0	0	0	0	0
Solyc00g304630	0.0325		0	0	0	0	0	0	0	0	0	0	0	0	0	0	0	0	0	0	0	0	0	0	0	0	0	0	0	0	0	0	0	0	0	0	0	0	0	0	0	0	0	0	0	0	0	0	0
Solyc00g306730	0.0275		0	0	0	0	0	0	0	0	0	0	0	0	0	0	0	0	0	0	0	0	0	0	0	0	0	0	0	0	0	0	0	0	0	0	0	0	0	0	0	0	0	0	0	0	0	0	0
Solyc00g306830	0		0	0	0	0	0	0	0	0	0	0	0	0	0	0	0	0	0	0	0	0	0	0	0	0	0	0	0	0	0	0	0	0	0	0	0	0	0	0	0	0	0	0	0	0	0	0	0
Solyc00g308530	0.723333		0	0	0	0	0	0	0	0	0	0	0	0	0	0	0	0	0	0	0	0	0	0	0.03	0	0	0	0	0	0	0	0	0	0	0	0	0.055	0	0	0	0	0	0	0	0	0	0	0
Solyc00g308930	0.1175		0	0	0	0	0	0	0	0	0	0	0	0	0	0	0	0	0	0	0	0	0	0	0	0	0	0	0	0	0	0	0	0	0	0	0	0.03	0	0	0	0	0	0	0	0	0	0	0
Solyc00g309530	1.56333	Expressed	0	0.0388104	0	0.0303795	0	0	0	0.0325	0	0	0.0275	0.0225	0	0.06	0.025	0.0678694	0	0.0334166	0	0	0.025	0.03	0.0275	0	0	0.015	0.095	0.0259808	0.035	0	0.03	0.0390246	0.0933333	0.0433333	0.025	0	0	0	0.025	0.0275	0.0523609	0.0316228	0.093675	0.0225	0.0366003	0.025	0.0906803
Solyc00g311230	4.45333	Expressed	2.14593	0.140379	0.0618297	0.114964	0.161265	0.0552268	0.0963933	0.0617792	0.0291548	0.0961336	0.105238	0.0225	0.0225	0.0366003	0	0	1.18035	0.136221	0.0450925	0.0430842	0.0908295	0.0545245	0.0749444	0.0968138	0.0355903	0.0287228	0.12626	0.04272	0.0544671	0	0	0	1.35902	0.48254	0.10499	0.0306526	0.0988581	0.0357071	0.0981495	0.0337577	0	0.0397911	0.0320156	0.0363719	0.0627163	0.0367423	0
Solyc00g313030	0.815		0.04	0.0259808	0.03	0	0	0.0325	0	0	0	0	0.0225	0	0	0.035	0.025	0	0	0.0325	0	0	0	0	0	0	0	0	0	0	0.02	0.02	0	0	0	0	0	0	0	0	0	0	0.0275	0.0563471	0.0320156	0	0.035	0	0.0225
Solyc00g313530	0.0225		0	0	0	0	0	0	0	0	0	0	0	0	0	0	0	0	0	0	0	0	0	0	0	0	0	0	0	0	0	0	0	0	0	0	0	0	0	0	0	0	0	0	0	0	0	0	0
Solyc00g313930	1.44667	Expressed	0.0554777	0.0675	0	0	0	0.0225	0	0	0	0	0	0	0.0225	0	0	0.0425	0.101708	0	0	0	0	0	0	0	0	0	0	0	0	0	0	0	0.0566667	0.151694	0	0.0225	0	0	0	0	0	0	0	0	0	0	0
Solyc00g316030	0.89		0.89	0	0	0	0	0	0	0	0	0	0	0	0	0	0	0	0	0.0275	0	0.025	0	0	0	0	0	0	0	0	0	0	0	0.0125	0	0	0	0	0	0	0	0	0	0	0	0	0	0	0
Solyc00g316530	1.685	Expressed	0.273333	0.02	0.025	0.0275	0.0275	0.0327872	0.0225	0.0325	0.0225	0.065	0	0	0.0291548	0.0225	0.0625	0.0273861	0.12	0.0433013	0	0.025	0.0225	0.03	0.0325	0	0.035	0	0.02	0.02	0.030104	0	0.0275	0.0225	0.0409607	0.0800694	0.025	0.045	0	0.02	0.06408	0.0615596	0.0567891	0.0898146	0.025	0.0225	0.119338	0.0275	0.0658913
Solyc00g316730	1.16333	Expressed	1.16333	0	0	0	0	0	0	0	0	0	0.0275	0	0	0	0	0	0	0.0348807	0	0.025	0	0	0	0	0	0	0	0	0	0	0	0.0125	0	0	0	0	0	0	0	0	0	0	0	0	0	0	0
Solyc00g318030	2.175	Expressed	0	0	0	0	0	0	0	0	0	0	0	0	0	0	0	0	0	0	0	0	0.0225	0.03	0	0	0	0	0	0	0	0	0	0	0	0	0.0375	0.128477	0.0325	0	0.0225	0	0	0.0275	0	0	0	0	0
Solyc00g318130	44.3575	Expressed	0	0	0.025	0	0.0325	0.03	0	0	0	0	0	0	0	0	0	0	0	0.0339116	0.0749861	0.187216	0.0980965	0.0825	0	0	0	0	0	0	0	0	0	0.0225	0	0	0.53775	0.713057	0.136015	0.0554527	0.0980965	0.0570636	0.0525	0.0872735	0.0275	0	0	0.02529	0
Solyc00g318830	6.835	Expressed	0	0.0456435	0.169041	0.0614241	0.0500625	0.0405175	0.0924662	0.0825126	0.0317543	0.0622328	0.0495606	0.0409268	0.0342783	0.0309233	0.0770822	0.292984	0	0.148401	0.0965553	0.140149	0.076635	0.0558271	0.0781425	0.12691	0.1025	0.0507445	0.0561805	0.06245	0.147387	0.0575	0.0974145	0.272351	0	0	0.104283	0.356429	0.0334166	0.0554339	0.0615596	0.0388104	0.210411	0.146742	0.276206	0.218117	0.194808	0.236233	0.215909
Solyc00g320430	1.44	Expressed	0.0554777	0.04	0.0320156	0.0275	0.0375278	0	0.0225	0.0275	0	0	0.03	0.0475	0.0275	0	0.0489898	0.03	0.0333333	0.0275	0.0325	0	0	0	0	0.035	0	0.0244949	0	0.0225	0	0.0575	0	0.025	0.133208	0.223781	0	0	0	0	0.05	0.0325	0.0291548	0	0	0.02	0.0666302	0	0
Solyc00g322630	0.65		0	0	0	0	0	0	0	0	0.0275	0	0	0	0	0	0	0	0	0	0	0.025	0	0	0	0	0	0	0	0	0	0	0	0	0	0	0.02529	0.0332603	0	0	0	0	0	0.025	0	0	0	0	0
Solyc00g322830	0.1975		0	0.0225	0.025	0	0	0.0259808	0	0.0575	0	0.0375278	0.0332603	0.0225	0.0225	0.0225	0.0309233	0.0275	0	0.0525	0	0.0409013	0.0525	0.034641	0	0.065	0.035	0.015	0	0.0246221	0.02	0.025	0.055	0.0239357	0	0	0.025	0	0	0.0225	0	0.0225	0.03	0.0325	0.025	0	0	0.0175	0
Solyc00g323130	1.8175	Expressed	0	0	0	0.025	0.0303795	0	0	0	0	0	0	0	0	0	0	0	0	0	0.0275	0.0390246	0.0253311	0.03	0	0	0	0	0	0	0	0	0.0225	0	0	0	0.12114	0.0847054	0.115857	0.254591	0.359708	0.452224	0.0275	0	0	0	0	0	0
Solyc00g324530	0.0475		0	0	0	0	0	0	0	0	0	0	0	0	0	0	0	0.0275	0	0.0225	0	0	0	0	0	0	0	0.025	0	0.02	0	0	0.03	0	0	0	0	0	0	0.0225	0	0	0	0	0.025	0	0	0	0
Solyc01g005000	2746.62	Expressed	8.77301	1.03953	3.08256	4.7557	6.92684	5.78481	4.87611	7.94892	2.3902	2.85865	2.63982	0.456417	0.274985	0.302583	0.6845	0.577725	11.5268	5.9723	4.5061	7.18014	11.3599	5.93016	8.03162	4.72535	3.93559	4.42924	2.51734	0.558217	0.669333	0.819766	0.203695	0.203649	36.309	12.01	20.9947	21.5115	10.6007	4.71633	6.20358	10.8175	0.239165	0.270724	0.376851	0.319192	0.20093	0.166958	0.20093
Solyc01g005010	43.9975	Expressed	3.50208	0.420325	0.569137	0.79889	0.551626	0.463939	0.269212	0.565921	0.441048	0.211005	0.550015	0.234747	0.106615	0.247824	0.11726	0.125565	6.21547	1.40025	0.741602	0.788156	0.219141	0.733133	0.459118	0.38954	0.624613	0.401692	0.442707	0.140772	0.0948683	0.0922406	0.0642099	0.0488834	1.00001	0.0493288	0.782443	0.625558	0.325304	0.280773	0.21783	0.313538	0.118673	0.0625833	0.0487126	0.112175	0.1025	0.0689202	0.0786739
Solyc01g005020	116.045	Expressed	1.50919	1.86943	3.12234	0.93537	4.19412	3.68415	1.819	2.7459	2.84655	2.67702	1.9764	5.15779	2.11355	3.13766	2.91968	1.77282	0.354134	3.62255	2.61362	7.15608	1.26647	3.56764	5.43402	1.62183	5.27751	5.89511	3.04613	1.73173	2.669	1.51638	0.824999	1.78382	4.34344	0.542494	3.52326	2.73336	8.12499	4.27198	4.92892	3.84776	0.957082	3.72285	4.6632	1.2057	1.17284	0.435093	0.757214
Solyc01g005030	210.67	Expressed	8.45959	0.824874	0.607248	1.66925	3.81892	0.612922	1.53076	1.22465	5.0535	3.62054	8.69179	6.09507	4.69613	5.26837	3.28856	2.93586	2.3917	0.832046	0.910815	2.97068	1.39142	0.814661	3.38956	3.08821	7.03068	5.53057	8.66435	1.72182	1.71431	2.30834	2.56657	1.81978	8.83494	3.22742	0.953922	2.40443	6.5817	5.91431	5.79088	6.23589	4.18281	8.1733	10.8084	0.769827	1.51783	2.14873	0.878246
Solyc01g005040	0.7675		0	0.02	0	0.025	0	0.0225	0	0	0.308123	0.115353	0.103229	0.058648	0.0430842	0	0	0	0	0.04	0	0	0	0	0	0	0	0.03	0	0.02	0	0	0	0	0	0	0	0	0	0	0	0	0	0	0	0	0	0	0
Solyc01g005050	1.20667	Expressed	0.11547	0.0325	0	0.0225	0	0	0	0	0	0	0	0	0	0	0	0	0.0726483	0	0	0	0	0.03	0.0325	0	0	0	0	0	0	0	0	0.0125	0.03	0	0	0	0	0	0	0	0	0	0	0	0	0	0
Solyc01g005060	85.1725	Expressed	2.22432	2.27017	1.61844	0.733921	1.02289	1.22445	1.50402	0.1674	1.75925	1.12572	0.736912	0.459807	0.260608	0.295367	0.926256	0.392088	10.1564	0.795229	1.10884	1.30737	0.58709	1.64106	0.827859	0.358457	0.858821	0.677219	0.668213	0.680325	0.372055	0.123988	0.232069	0.521542	0.138604	0.0578312	0.332299	0.223248	0.181539	0.136809	0.175	0.0817899	0.127214	0.0777282	0.0409013	0.0739792	0.135485	0.140201	0.0311916
Solyc01g005070	3.46	Expressed	1.27163	0.0464354	0.0625167	0.112916	0	0	0	0	0	0	0	0	0	0	0	0	1.0022	0.0319831	0.0627827	0.071923	0	0	0	0	0	0.015	0	0	0	0	0	0	1.57424	0.145297	0.0426956	0.0225	0.03	0	0	0	0	0	0	0	0	0	0
Solyc01g005080	83.535	Expressed	4.81869	6.66311	2.83072	1.55401	6.89076	4.88608	3.76756	2.05996	5.22888	3.58902	2.23782	2.0739	2.62593	2.41257	1.35997	1.22696	3.93007	5.47363	1.7357	0.647785	1.14696	1.75327	0.752566	1.31607	2.26365	0.776288	0.388166	0.569347	0.165095	0.474735	0.21704	0.581641	3.16131	0.0902466	0.221077	0.309745	0.139187	0.335298	0.338462	0.273816	0.127957	0.173656	0.117969	0.0657013	0.0572094	0.104363	0.0646142
Solyc01g005090	3.2275	Expressed	0	0	0	0	0	0	0	0	0	0	0	0	0	0	0	0	0	0	0	0	0	0	0	0	0	0	0	0	0	0	0	0	0	0	0	0	0	0	0	0	0.0483692	0.03	0	0	0	0	0.0175
Solyc01g005100	29.4025	Expressed	1.35704	1.59519	1.25675	0.427909	0.823462	0.528504	1.55861	1.17715	1.77964	0.387234	1.76527	0.702602	0.806655	0.264386	0.639101	0.739373	1.0607	0.465857	0.4728	1.12172	1.10436	1.0449	1.50046	1.07867	0.706923	1.01822	0.969596	0.449748	0.499708	1.29718	0.493845	1.91103	0.160416	0.402616	0.63578	1.17767	1.73058	0.674542	0.92517	1.20826	0.467732	0.637299	1.19407	0.50673	0.5939	0.491164	0.775923
Solyc01g005110	33.3225	Expressed	3.62343	0.747266	0.776863	0.474647	1.04366	0.659634	0.480469	0.750793	1.33698	1.08918	0.620255	0.776799	0.537609	0.454558	0.541747	1.2291	3.47094	1.39854	0.556499	0.399552	0.544049	1.35121	0.42317	0.4523	1.03161	1.65925	1.14379	0.812469	2.0086	0.958414	1.03462	1.64927	1.20604	1.87041	0.185068	0.808749	0.591458	0.598735	0.841749	0.373215	0.576258	0.806292	0.526741	0.527247	0.147387	0.305096	0.918246
Solyc01g005120	137.062	Expressed	19.4947	1.02967	0.597641	1.19829	1.73598	1.16917	2.8431	1.58564	1.90916	2.45218	2.77682	1.54704	0.509647	1.18026	1.55304	1.00305	4.90058	1.11225	1.66798	1.18002	0.893471	1.16195	2.85991	6.02625	1.7225	1.15915	2.68625	0.550719	0.669602	1.02683	0.425392	0.493058	7.0396	0.292252	2.98568	0.474805	0.65296	0.310564	0.751747	0.541116	0.396513	0.453119	0.442097	0.448337	0.205122	0.167456	0.433868
Solyc01g005130	115.223	Expressed	1.20079	0.239635	0.596294	0.826725	1.67361	0.167183	0.484656	0.721565	0.264953	0.697023	0.524039	1.20071	1.43894	0.780356	0.295888	0.89363	2.24549	0.0991106	0.474577	0.878791	0.461348	1.24025	0.691814	1.12955	1.09925	0.464641	0.509779	1.38472	0.731773	0.450211	0.541347	0.626718	5.68934	0.372216	0.515728	1.05994	0.571291	1.11431	0.297023	0.868226	1.22441	0.747188	0.770384	0.396661	2.2655	0.812968	0.723411
Solyc01g005140	59.7267	Expressed	0	0	0	0.0483692	0.155798	0.381737	0.342986	0.357197	0.276692	0.466268	0.527075	0.788305	1.04724	1.56492	0.732989	1.70628	0	0	0	0	0.11128	0.202171	0.0503322	0.204083	0.421001	0.595357	0.50324	0.65395	0.694843	0.82516	0.88531	1.17146	0	0	0.025	0.174851	0.259663	0.639028	0.428843	0.467101	1.05828	1.40141	0.0426224	2.91599	2.27068	1.36869	2.36887
Solyc01g005150	3.82	Expressed	0.123333	0.155483	0.0536967	0.157711	0.104513	0.040078	0.033665	0.0792149	0.0225	0.0551513	0.0339116	0.0275	0.06	0.0473242	0.03	0.0225	0.276667	0.066458	0.0870345	0.109316	0.0487126	0.0325	0.100747	0.0775	0.05	0.0640963	0.0877852	0.04272	0.0340343	0.0903235	0.0497494	0.0239357	0	0	0.0623832	0.0375	0.0325	0.0425	0.025	0.0388104	0	0.0325	0	0	0	0.0225	0
Solyc01g005160	10.2775	Expressed	0	0.0549242	0.0545245	0.025	0.0325	0.378308	0.13687	0.03	1.92115	0.104513	0.103682	0.875332	0.173943	0.03	0.196103	0.0422295	0	0.0327872	0.0325	0.025	0	0.124189	0.03	0	0.445169	0.0611692	0.1875	0.268495	0.0285774	0.0275	0.0225	0.0125	0	0	0.0428904	0.0225	0	0.187328	0.0592136	0	0.798295	0.058023	0.0625	0.19006	0.0589315	0	0.0375
Solyc01g005170	3.9475	Expressed	0	0.0636396	0.0265754	0.0292617	0.196908	0.191855	0.357118	0.0369685	0.0572094	0.301842	0.217155	0.208107	0.34267	0.113174	0.0827018	0.435833	0	0.0924662	0.025	0.153704	0.114483	0.271397	0.223346	0.336585	0.325356	0.393687	0.335522	0.196018	0.262341	0.202171	0.242796	0.484017	0.11	0	0	0.110331	0.229941	0.259294	0.285336	0.263356	0.122406	0.36799	0.282975	0.267811	0.479105	0.301234	0.387836
Solyc01g005180	39.28	Expressed	0	0	0.025	0.0469707	0	0	0	0	0	0	0	0	0	0	0	0	0	0	0.177412	0.119269	0.14239	0	0	0	0	0	0	0	0	0	0	0	0	0	0.200229	0.573126	0.074652	0	0.0625	0	0	0	0	0	0	0	0
Solyc01g005190	1.40667	Expressed	0.169542	0.0998645	0.0601907	0.0949013	0.182711	0.0546771	0.0405175	0.164488	0.0801431	0.0787401	0.121552	0.0737535	0.07565	0.0762124	0.0618466	0.00707107	0.1	0.0188746	0.0473462	0.0813429	0.0317214	0.0863134	0.172385	0.0771767	0.0970395	0.067992	0.0934857	0.222537	0.0403113	0.143846	0.0785679	0.093039	0.03	0	0.0280995	0.0375	0.0551324	0.0980965	0.137629	0.0876903	0.101201	0.0676233	0.116261	0.0347611	0.126392	0.0417333	0.0430116
Solyc01g005200	0.77		0.04	0.0325	0.0425	0.0525	0.0534439	0.0644205	0.0225	0.0924211	0.0442295	0.0638357	0.071807	0.065	0.0259808	0.0301386	0.025	0	0	0.0613052	0.0327872	0.0707549	0.0262996	0.101571	0.0781425	0.0593542	0.035	0.0474342	0.0325	0.045	0.0534439	0.0303795	0.0262599	0.0452769	0	0	0.02529	0.0309233	0.0361421	0.0221736	0.03966	0.0469707	0.0275	0.0590903	0.0303795	0.0425	0	0.0632949	0.0225
Solyc01g005210	351.147	Expressed	7.35192	0.55149	0.619926	2.13583	2.68231	4.06861	1.8908	1.3327	4.50848	7.58334	10.8136	10.4943	6.20369	6.57493	9.31188	4.41511	3.83996	2.19189	3.13131	4.9271	2.07592	2.56942	2.76926	3.55593	1.95962	4.02629	6.33217	6.59228	9.74344	7.21966	6.19911	3.57024	3.62046	1.27925	0.687779	2.08208	4.63249	4.81981	1.57667	4.14343	1.57349	1.34701	1.97898	7.18114	7.51947	8.42605	2.6757
Solyc01g005220	53.9525	Expressed	1.50957	0.160338	0.15052	1.01801	1.52186	2.87949	1.72278	1.33662	4.85344	1.01	0.654196	1.44534	0.544212	1.14533	0.521456	1.19164	3.04323	0.183007	0.149297	1.00281	1.05824	0.856976	2.59477	1.57451	2.17728	0.506672	1.75254	2.273	1.47283	1.58255	3.62647	0.827738	0.741403	0.146553	0.219773	1.80918	0.858463	2.11281	1.75092	1.43485	0.939977	1.06415	0.452887	0.470042	0.44949	0.162346	0.76717
Solyc01g005230	0.88		0	0	0.0225	0.121886	0.170606	0.150243	0.158272	0.136931	0.23768	0.14459	0.0520216	0.0425	0.0291548	0	0.045	0	0	0	0.0325	0.127565	0.0726149	0.150388	0.0779423	0.0973289	0	0.025	0	0.0505594	0.0375	0.0422295	0.0275	0.025	0	0	0.041508	0.0371932	0.10336	0.0535996	0.0782091	0.0149304	0.0275	0.025	0	0.0225	0	0.0225	0
Solyc01g005240	85.4675	Expressed	1.28784	2.20565	1.85356	1.1951	4.32314	1.81767	4.78606	4.0579	3.39374	2.93444	4.84974	2.27041	1.56974	4.76418	4.20456	1.08091	2.31089	2.03421	1.46001	8.72486	3.69144	4.54455	2.73121	3.48798	2.6016	7.30518	3.2768	2.15053	3.06311	2.27889	1.9913	2.93044	0.808847	2.46568	2.60898	2.30027	1.0751	1.51598	1.38715	1.45262	1.06934	1.07318	2.27524	2.08218	1.08125	1.40644	1.81678
Solyc01g005250	126.918	Expressed	11.7186	3.15001	1.11359	2.44046	1.20854	2.00508	1.56005	0.952036	2.69048	3.34083	3.22775	1.15812	0.867492	1.36893	1.29941	0.823048	8.38935	5.06172	2.21133	8.21572	3.72122	0.7982	3.05669	0.663438	1.63197	2.14488	1.95763	0.842342	2.43877	2.22488	3.93886	4.15436	5.9389	6.52826	2.71232	2.67808	1.44624	2.25167	0.518642	1.68324	1.35829	1.32751	1.89982	0.691237	1.60043	0.445671	1.48931
Solyc01g005260	71.05	Expressed	2.6969	0.102835	0.221072	0.272687	0.581455	0.133198	0.479868	0.305082	0.582738	0.604483	0.153154	0.373151	0.247365	0.47093	0.351923	0.243071	69.0222	0.231242	0.305324	0.422581	0.45206	0.412371	0.110529	0.195379	0.747072	0.175452	0.391621	0.223919	0.120692	0.368677	0.218913	0.27069	2.81563	1.46426	0.28349	0.105909	0.28788	0.314414	0.411792	0.255098	0.155958	0.158246	0.232069	0.0752773	0.166902	0.119652	0.14952
Solyc01g005270	11.9667	Expressed	0.84824	0.579962	0.184046	0.0358236	0.26385	0.337589	0.101108	0.397647	0.433155	0.172747	0.219412	0.492212	0.442474	0.834651	0.495032	0.0653835	0.9473	0.148176	0.0566238	0.188298	0.101108	0.108819	0.0696419	0.138864	0.152042	0.144128	0.0922293	0.0322426	0.110905	0.110783	0.0775672	0.164975	1.60842	0.564427	0.249416	0.396072	0.289554	0.246035	0.445278	0.645967	0.168443	0.0770687	0.289695	0.115785	0.16065	0.0440407	0.138346
Solyc01g005280	176.227	Expressed	3.73374	0.238432	0.693121	0.71581	0.571723	0.151355	0.521814	0.323686	0.787877	0.498029	0.836506	1.10118	0.842422	1.77091	0.689098	0.238642	0.0333333	0.768661	0.132563	0.196235	0.0884473	0.30283	0.0905999	0.0579511	0.138225	0.0810735	0.0525991	0.0668331	0.169724	0.139187	0.122916	0.151733	1.40861	0.343948	0.040078	0.0572094	0.0975854	0.0347611	0.0560506	0.0319831	0.0225	0.0818026	0	0.0272336	0.055	0.0512348	0.0475
Solyc01g005290	56.4633	Expressed	0.197512	0.159792	0.287239	0.108963	0.313193	0.0798305	0.168146	0.222275	0.306305	0.527739	0.456588	0.481759	0.717477	1.45506	0.928443	0.967066	0	0.11199	0.0478496	0.393835	0.135923	0.0593542	0.0838028	0.0796215	0.274086	0.131109	0.144128	0.439593	0.380767	0.259306	0.56336	0.904498	0.18735	0.106667	0.0524404	0.0777148	0.0359108	0.0425	0.0320156	0.0686021	0.0913327	0.0653835	0.0448144	0.086446	0.143846	0.20328	0.0961769
Solyc01g005300	140.74	Expressed	3.1241	2.33414	6.39828	1.68032	8.89839	3.62419	3.39219	3.79376	9.57671	9.4274	5.2334	7.19686	4.08291	7.5057	9.68053	5.2086	10.3579	3.98545	7.05365	10.8118	5.25014	5.58176	6.03129	5.82021	9.78406	9.99138	5.86378	7.49215	5.48065	7.11887	3.81182	3.21977	8.20288	2.90338	5.54263	7.80222	8.54202	10.8951	13.3424	6.42189	2.29958	4.85169	2.28709	6.6199	5.73245	2.88362	5.946
Solyc01g005310	1.04	Expressed	0.216205	0	0.025	0	0	0.0225	0	0	0	0.0325	0.055	0	0.0259808	0	0	0.03	0.339329	0	0	0.05	0	0	0	0.035	0	0	0	0	0	0	0	0.0325	0.121701	0.0351188	0.035	0.0291548	0.120856	0	0.0576447	0.0535996	0	0.0275	0	0	0.035	0.0175	0
Solyc01g005320	1.78333	Expressed	0.305523	0.0855375	0.0242813	0.0940744	0.0517204	0.0309233	0.0327872	0.0652399	0.0275	0.0308221	0.045	0	0	0.0347311	0	0.0225	0.0888819	0.0402078	0.068374	0.0961336	0.0291548	0.03	0.0618466	0.05	0.025	0.025	0.0319831	0	0.0325	0	0.0275	0.0225	0.03	0	0	0.0481966	0.0317543	0.0578072	0.0625	0.0525	0.03	0.025	0	0.0225	0	0	0
Solyc01g005330	176.197	Expressed	8.24532	8.85922	8.16234	2.1801	5.94857	2.82364	4.50006	1.05722	2.42734	4.02468	2.49516	2.70346	1.66829	2.08617	1.24683	0.220506	20.6444	13.0104	4.64064	4.29511	2.59155	4.2795	2.32909	1.40172	3.38144	2.5248	1.64873	3.03011	1.22769	2.08973	1.89736	0.723261	9.41287	12.6312	5.71301	4.35219	1.56889	2.46831	4.23445	5.54957	1.29003	2.24593	2.73571	0.421565	0.81368	0.686129	0.372589
Solyc01g005340	61.7125	Expressed	4.27383	0.826452	1.00898	1.23968	1.74831	0.532987	1.18315	1.37407	2.25058	1.27827	1.7248	1.72575	0.393923	0.633093	0.892478	1.54275	2.32798	0.592762	0.456664	1.60976	1.24907	1.25318	0.73911	1.14003	1.32919	1.47624	0.989102	2.06279	2.08868	1.67429	1.54426	2.00006	0.786688	0.135277	0.764973	0.919632	1.16861	2.29299	0.800108	5.26462	0.785462	1.68614	1.75248	1.38572	1.47675	0.559434	2.00007
Solyc01g005350	0.0575		0	0.0225	0.025	0	0.025	0	0	0.03	0	0	0.03	0	0	0	0	0	0	0.0275	0.0337577	0.0288675	0.045	0	0	0.0325	0	0	0.0325	0	0	0	0	0	0	0	0.025	0	0	0	0	0	0	0	0	0	0	0	0
Solyc01g005360	4.6175	Expressed	0	0.159915	0.112055	0.093675	0.186123	0.58638	0.346458	0.425292	0.143897	0.668157	0.181774	0.203899	0.567383	0.620233	0.367704	0.141833	0.111355	0.104363	0.0545245	0.104033	0.288888	0.142273	0.227046	0.177218	0.494324	0.39926	0.524802	0.182226	0.497443	0.544954	0.178903	0.247736	0.0491031	0	0.0684957	0.0604669	0.208846	0.28	0.205076	0.286455	0.201846	0.324268	0.296096	0.35556	0.270832	0.308572	0.446381
Solyc01g005370	48.4067	Expressed	2.15116	1.15448	0.186949	0.589002	0.394525	1.62718	1.23984	1.13264	1.527	1.67533	1.89269	0.72917	1.39982	1.21943	1.1247	1.18071	3.75745	0.410515	0.287866	0.260684	0.586238	0.710462	0.323213	0.980785	1.29229	3.45105	3.9741	0.630772	0.660524	0.939054	0.870062	0.583943	0.83555	0.519882	0.247487	0.367696	0.820156	0.795498	0.108743	0.731897	0.752141	1.72648	0.722292	2.00101	1.64984	1.81156	1.45236
Solyc01g005380	67.39	Expressed	4.14075	0.94104	0.763004	0.47486	0.765369	0.385516	0.61781	0.59441	0.514172	0.974024	1.36351	0.302999	0.697285	0.52007	0.583052	1.43556	26.1995	0.696795	1.21896	0.647847	0.665537	1.08345	0.620571	1.02322	0.686112	0.174475	0.471646	1.1103	1.36284	1.03514	1.11603	1.00029	26.1278	1.76862	0.69824	0.868374	1.37973	0.71599	0.766192	0.763817	0.626437	0.616325	0.792227	0.494891	0.449639	0.188873	0.370866
Solyc01g005390	24.035	Expressed	0.01	0.0513971	0.035678	0.107781	0.0406971	0.0983616	0.266536	0.0558271	0.319801	0.3121	0.045	0.778016	0.0988686	0.109345	0.0790965	0.116503	0.206667	0.12227	0.0561805	0.0719954	0.0792149	0.0348807	0.057373	0	0.254865	0.0753326	0.119678	0.099373	0.11669	0.0974252	0.0762124	0.054064	0	0.0726483	0.0612372	0.175547	0.106174	0.0657489	0.0614241	0.0838028	0.180156	0.134257	0.147047	0.13344	0.132476	0.0720388	0.0354436
Solyc01g005400	117.278	Expressed	1.27735	0.123651	0.180393	0.0603462	0.13435	0.225278	0.100913	0.0673919	0.118559	0.150243	0.143585	0.398714	0.246183	0.125632	0.21223	0.342454	0.505206	0.535434	0.322309	0.0839643	0.294293	0.357678	0.22922	0.073598	0.0769605	0.134621	0.0551324	0.23689	0.157817	0.180526	0.305314	0.196829	0.0504425	0	1.34695	0.55939	0.2125	0.405853	0.521814	0.575056	0.411238	0.674887	0.168548	0.260352	0.539326	0.207143	0.139762
Solyc01g005410	30.2075	Expressed	0	0.229615	0.660013	1.93448	1.62293	1.12408	1.03922	2.76426	1.87753	0.935637	1.35037	0.112138	0.0827144	0.11225	0.0596343	0.0494975	0.133333	0.272855	0.421456	0.483882	0.687344	1.5162	0.37473	0.78935	0.446101	0.243738	0.208021	0.11	0.0666302	0.17881	0.00629153	0.129317	0.0856997	0.117945	0.159922	0.395095	0.139314	0.134992	0.788268	0.447984	0.129936	0.161607	0.0681909	0.0543139	0.0654949	0.220128	0.102103
Solyc01g005420	14.9125	Expressed	0	0.110934	0.058648	0.0411045	0.0941962	0.1068	0.111159	0.055	0.233822	0.0375278	0.106066	0.1125	0.0225	0	0.0225	0	0	0.250416	0.169626	0.0768115	0.0517204	0	0	0	0	0	0.02	0	0.02	0	0	0	0	0.215174	0.106722	0.128087	0.192462	0.0578072	0.03	0.04	0.06	0	0.0275	0.02	0	0	0
Solyc01g005430	16.8	Expressed	3.84501	0.603426	0.271937	0.396997	0.314073	0.263328	0.311458	0.646104	0.871875	0.585249	0.250832	0.557007	0.701004	0.57094	0.929286	0.94964	2.46272	0.625466	0.270874	0.218575	0.179461	0.491501	0.940101	0.949512	0.581512	0.110482	0.829833	0.549657	0.824727	0.374686	0.189797	0.378385	2.23005	0.600259	0.322681	0.26927	0.274177	1.04174	0.800448	0.441859	0.47252	0.34896	0.307608	0.648627	0.481636	0.615488	0.680458
Solyc01g005440	413.1	Expressed	31.2368	11.2963	14.7686	10.5822	7.60313	9.98901	7.22345	10.2683	8.19404	8.31138	4.8571	0.27497	2.46118	3.41099	2.8836	2.26393	58.8424	10.4	8.86521	10.5988	5.19017	6.86357	13.7072	9.07504	6.97037	6.14792	4.92937	2.27407	1.84537	2.23392	1.58735	2.71619	39.7367	21.98	19.9427	25.2668	12.1237	7.90819	7.27361	11.7799	2.81199	2.37213	1.97081	1.30157	0.897803	0.797674	3.07095
Solyc01g005450	16.2	Expressed	1.8857	0.694639	0.551853	0.45299	0.56164	0.641879	0.185264	0.560705	0.488765	0.404372	0.336576	0.536975	0.143839	0.234889	0.287268	0.251794	1.75627	0.386553	0.279538	0.64786	0.283049	1.10798	0.554414	0.582387	0.903369	0.680447	0.471646	0.135953	0.307923	0.229905	0.373374	0.156578	1.32639	0.467761	0.427834	0.427181	1.35376	0.374388	0.455803	0.331923	0.282529	0.245798	0.419305	0.0828654	0.276933	0.238376	0.0858657
Solyc01g005460	22.25	Expressed	8.76377	1.23534	0.413912	0.322526	0.282618	0.198552	0.304504	0.523106	0.341028	0.432705	0.424843	0.0228674	0.0918785	0.113027	0.0548483	0.260204	6.1744	1.39298	0.433904	0.17253	0.365536	0.0676233	0.265926	0.235549	0.193923	0.195251	0.0620484	0.0843974	0.0651281	0.0758837	0.0337886	0.0515388	0.314766	0.296329	0.615318	0.45296	0.367273	0.253258	0.222186	0.385184	0.0827647	0.0543906	0.215769	0.161935	0.00707107	0.0705189	0.144648
Solyc01g005470	23.365	Expressed	2.57775	0.623411	0.209483	0.265436	0.407459	1.1762	2.10364	0.382219	6.04881	2.59886	5.01441	0.646974	0.388359	0.781649	0.221228	0.0904042	8.3495	0.289367	0.0679461	0.0623665	0.0678694	0.255832	0.142683	0.124967	0.424703	0.167699	0.493668	0.252933	0.159707	0.125922	0.177641	0.0501664	0.93	0	0.324535	0.105119	0.121861	0.0433013	0.0342479	0.045	0.0225	0.0275	0.0253311	0.0425	0.035	0.0184842	0.0175
Solyc01g005480	15.7933	Expressed	0.44461	0.663256	0.582137	0.40844	0.535372	0.428466	0.915208	0.331688	0.249149	0.376417	0.64971	0.416381	0.40508	0.38793	0.131339	0.272622	2.09814	0.316833	0.59808	0.385552	0.552379	0.495015	0.22198	0.448293	0.477712	0.507221	0.401629	0.252949	0.986825	0.404166	0.252401	0.334228	1.4434	0.214035	0.815448	1.28479	0.549065	0.388016	0.283799	0.318355	0.197921	0.323918	0.234925	0.290728	0.417013	0.264933	0.150686
Solyc01g005490	39.655	Expressed	2.31808	0.998827	1.05871	2.01762	0.821401	0.94975	0.964187	1.02943	1.7751	1.14524	0.808342	0.858054	1.48738	0.640052	0.803247	0.406089	5.02791	1.39071	1.08648	0.642067	0.470354	1.90664	1.55779	0.666263	1.29718	1.95983	1.39151	1.29428	1.36672	0.958318	1.8324	0.573658	9.81435	0.0622718	1.47076	0.4897	0.935792	0.812506	1.18933	1.66546	0.771325	0.51079	1.04794	1.1148	1.12991	1.02683	0.358873
Solyc01g005500	3.84667	Expressed	0	0	0	0	0	0.045	0.1625	0.06	0.362776	0.717054	0.454579	0.159818	0.345688	0.239826	0.03	0.0848896	0.03	0	0.025	0.025	0	0	0	0	0	0	0.0325	0	0.02	0.0332603	0	0	0	0	0.025	0.0275	0	0	0	0	0	0	0	0	0	0	0
Solyc01g005510	0.435		0	0.0806613	0.0349702	0.0291548	0.0347311	0.0325	0	0	0.0675	0	0.0291548	0.0225	0.0225	0.0275	0.055	0.0225	0	0.0676387	0.177036	0.0470815	0.0613732	0.03	0.035	0.03	0.0319831	0.025	0.02	0.02	0.02	0	0	0	0.186815	0.0392994	0.05	0.0526585	0.0375278	0.0225	0.0309233	0.04272	0	0.0275	0.0275	0.0246221	0.0275	0	0.0217466
Solyc01g005520	66.05	Expressed	0.796806	2.44511	1.03974	2.95764	0.691886	3.60018	1.4416	1.55356	1.49998	2.04904	1.04662	2.73355	2.72367	0.831097	2.37045	2.57106	1.6411	2.1447	0.149965	1.93077	2.15372	3.86304	0.816604	1.13042	2.71566	1.72982	0.498989	0.991114	2.17621	0.898095	0.944533	0.623632	0.338641	1.22529	0.847359	1.05128	1.06993	0.534203	1.47877	1.18415	0.754812	0.885987	1.15483	1.11318	0.855507	0.422621	0.55733
Solyc01g005530	46.3067	Expressed	2.22372	1.00778	0.70231	0.703059	1.31789	0.824611	0.331345	0.721669	0.919469	0.638161	0.624733	0.526187	0.307205	0.299639	0.146458	0.204308	1.9919	0.713762	0.83277	0.766844	0.896976	0.6192	0.0622328	0.217294	1.24171	0.850219	0.904968	0.110189	0.43689	0.294066	0.468586	0.235527	2.13936	0.652482	0.561314	1.33427	0.314232	0.600116	1.44349	0.676872	0.302528	0.149854	0.398881	0.659021	0.673183	0.434329	0.495648
Solyc01g005540	27.6825	Expressed	0.486975	2.01921	0.418788	0.475997	0.519188	0.875741	0.647984	1.16082	1.22741	1.09259	0.730896	0.652372	0.35694	0.413582	0.789709	0.331725	2.45551	1.66899	0.867807	1.26025	0.32597	0.601268	1.1307	0.999019	0.719472	0.550197	0.203327	0.243105	0.563442	0.331688	0.711401	0.742635	1.88169	1.55291	1.46755	0.573387	0.722246	0.463436	0.113284	0.507305	0.75223	0.338289	0.831348	0.522452	0.711587	0.555803	0.642863
Solyc01g005550	274.978	Expressed	25.3936	3.81729	12.8789	4.04952	6.70627	1.08707	2.49149	0.822238	4.22406	2.70139	4.62204	2.18427	3.07138	1.0392	0.95223	0.484811	47.0761	12.9464	1.09369	5.21329	0.976482	4.05545	2.29529	3.4369	5.16334	4.95014	2.52279	1.12133	0.889358	1.4981	1.00011	0.412644	15.9344	9.28595	2.6432	1.35087	1.21479	1.23611	1.17401	1.85037	0.474254	1.21113	1.3385	0.618082	0.442858	0.583909	0.939898
Solyc01g005560	1104.68	Expressed	10.3085	4.62179	1.91382	8.38245	6.03119	1.37937	5.94071	10.2656	29.743	25.5804	24.9994	16.1332	9.00297	21.6521	7.68546	5.68398	10.7122	4.5299	5.66082	7.03212	3.46093	5.64905	2.54661	2.42633	52.3586	35.8559	52.8751	4.11661	7.0133	9.35503	8.53396	7.28696	29.4547	2.01349	4.0134	0.907437	1.77227	1.04307	1.83196	0.842451	7.50465	8.89315	9.87248	4.37754	8.54112	4.26351	3.74237
Solyc01g005570	139.697	Expressed	7.04391	3.23101	1.18283	0.68338	1.41595	1.48518	1.47107	0.816419	0.381933	0.728576	1.52187	0.177265	1.84652	0.612168	1.05577	1.9369	12.4544	0.962526	1.4244	2.20492	1.20904	1.29912	0.679301	0.778924	1.91694	0.883057	1.45624	0.67003	0.845452	0.58012	0.573047	0.847244	2.66492	2.62777	0.883817	0.737552	0.782543	0.939047	0.924566	0.519367	0.377414	0.675358	0.27374	0.59479	0.572283	0.388402	0.52967
Solyc01g005580	76.0275	Expressed	2.0923	8.44572	1.96446	2.49043	2.42123	0.548154	2.0318	0.633673	0.514174	2.33526	2.06202	0.598672	1.68141	1.83734	1.28582	0.930953	2.44482	2.08273	1.56324	4.08556	1.45415	0.782118	1.29505	1.03571	1.80531	3.49546	2.54237	1.73506	1.80459	1.78541	1.97822	1.55905	1.46571	0.935788	1.5378	2.226	0.658724	1.9605	1.7434	2.00765	2.64143	2.1256	1.92525	1.03958	2.9156	1.33741	1.07925
Solyc01g005590	208.243	Expressed	31.0284	0.848891	1.82536	3.96576	1.59902	2.61686	2.19177	1.41604	0.715791	0.981618	0.751248	0.200224	0.341297	0.10331	0.103552	0.544769	21.41	2.07741	2.38105	0.384542	1.62311	1.35166	1.91861	0.948309	0.226435	0.335569	0.440237	0.280279	0.234592	0.199557	1.17637	0.774622	9.37342	12.6057	3.12857	2.58714	1.66966	0.431265	0.65599	0.713342	0.619691	0.222654	0.3525	0.818072	0.997016	0.631181	1.75855
Solyc01g005600	217.083	Expressed	2.96722	1.23221	1.92101	0.610915	2.05961	1.4135	2.14993	0.732307	1.83365	1.8886	2.18369	2.32808	4.05608	2.4275	3.97311	3.3113	12.0259	1.26361	1.74139	2.1386	1.693	0.993214	2.23316	1.0836	0.723009	2.18865	2.01924	2.33152	4.07167	1.70999	0.756356	2.17063	16.6132	1.31728	2.44965	2.79895	1.26425	3.04837	1.19965	2.38657	2.98439	2.17661	2.27896	2.47885	4.37772	1.04044	2.90599
Solyc01g005610	15.3167	Expressed	0.408344	0.0383786	0	0.0275	0	0.100416	0	0.0275	0.0275	0.0325	0.101366	0.114483	0.0225	0	0	0.03	0.930287	0	0.0475	0.112768	0.0325	0.03	0	0.025	0.1275	0.03	0	0	0.02	0	0	0	0.807389	1.485	0.0175	0.0225	0.0325	0	0	0	0.03	0.025	0	0.0275	0.0615596	0	0
Solyc01g005620	518.527	Expressed	19.6856	3.78363	10.0065	7.49035	10.4115	7.22211	9.72898	8.34893	8.01483	7.34998	9.96651	7.756	8.49455	7.50235	11.555	2.60504	17.0975	14.2009	14.6993	31.8665	15.7994	4.83232	7.74115	12.0171	8.33246	5.35881	8.06036	2.265	4.4976	4.27655	7.2082	2.36636	25.6208	10.9685	5.21909	16.4679	6.55421	5.50185	6.31497	9.83413	5.24281	6.62226	5.66381	4.99442	5.61355	4.22275	8.48781
Solyc01g005630	0.26		0	0	0	0	0	0	0	0	0	0	0	0	0	0	0	0	0	0	0	0	0	0	0	0	0	0	0	0	0	0	0	0	0	0	0	0	0	0	0	0	0	0	0	0	0	0	0
Solyc01g005640	65.3433	Expressed	2.14992	1.32744	0.702654	0.530289	0.98634	0.864507	1.66264	1.22332	0.886689	0.748992	1.86531	1.91563	0.698276	1.52358	2.02674	1.34661	2.44215	0.857778	0.791437	1.13757	0.85291	1.46991	0.92643	1.04231	1.89637	1.65515	2.02156	1.0446	1.38716	1.00407	0.503008	1.14122	5.69134	0.389544	0.317818	0.873626	0.752334	0.98467	0.586122	0.623665	0.629616	0.276748	1.35254	0.888438	0.720295	0.808357	0.324843
Solyc01g005650	4.05	Expressed	0.211371	0	0	0	0	0	0	0	0	0	0.0225	0	0	0	0	0	0.486667	0.02	0.0337577	0	0	0	0	0	0	0	0	0	0	0	0	0	0.0966667	0.151694	0	0	0	0	0	0	0	0	0	0	0	0	0
Solyc01g005660	21.8	Expressed	0	0	0	0.0303795	0.0615596	0.0668799	0.177594	0.0510514	0.0504975	0.135485	0.0509902	0.0368273	0.06	0.0225	0.05	0	0.1	0.135831	0.0337577	0.0767029	0.243875	0.21806	0.0526783	0.0421307	0.0517003	0.0870345	0.0676233	0.066128	0.0403113	0.0368273	0.0290115	0.0306866	0	0	0.0640312	0.13772	0.325743	0.254477	0.773858	0.339178	0.295705	0.334602	0.434998	0.115253	0.233251	0.228199	0.181361
Solyc01g005670	29.3533	Expressed	1.56343	0.519573	0.517591	0.316896	0.604359	0.508124	0.376018	0.754623	0.314229	0.642547	0.483856	0.537727	0.426446	0.193154	0.55756	0.511491	0.864819	0.505907	0.377624	0.373617	0.504882	0.191093	0.400843	0.557801	0.796016	0.503742	0.601734	0.371584	0.575925	0.161109	0.612141	0.156418	1.21806	1.20732	0.340646	0.291587	0.388641	0.251678	0.674579	0.624533	0.13671	0.619454	0.419253	0.205548	0.363464	0.304723	0.218685
Solyc01g005680	7.50333	Expressed	1.24175	0.0458939	0.0902196	0	0.0525	0.0225	0	0	0	0	0.0275	0.0452769	0	0.0225	0	0.0225	0.083865	0.0348807	0.0291548	0.0518813	0	0	0.0638357	0.05	0.025	0	0.035	0	0	0	0	0	0.199694	0.138684	0.0288675	0.0225	0	0.0246221	0	0	0	0	0	0	0	0.0175	0
Solyc01g005690	291.157	Expressed	18.1933	5.47719	1.88134	3.36258	4.81599	2.52543	1.29762	4.58375	2.69356	3.32023	2.65185	0.407687	1.09856	0.335572	0.748503	0.804104	32.3795	5.91872	3.53261	0.669683	2.8254	0.871879	4.79713	1.08577	1.38621	1.91162	0.349261	0.330615	1.58587	1.09682	0.558142	0.331747	26.8607	4.99859	4.89112	4.60506	1.52648	2.93096	3.53555	2.63383	1.50696	1.44859	2.01137	1.28366	1.30404	0.795114	0.280253
Solyc01g005700	22.615	Expressed	4.55434	0.552289	0.761244	0.204959	0.881688	0.283358	0.51368	1.5695	0.869986	0.231062	1.06044	0.431103	0.410051	1.14558	0.471858	0.702666	2.34116	1.01486	0.395738	0.753403	0.26511	0.307744	0.53559	1.40625	0.83298	0.885036	0.857228	0.899745	0.692128	0.462619	0.976997	0.502079	7.58488	0.300019	0.740433	0.762948	0.620811	0.797381	0.646611	1.49294	0.613479	0.63043	0.807269	0.590838	0.276266	0.434923	0.427746
Solyc01g005710	0.35		0	0	0.03	0.0291548	0.0619812	0.0642099	0.0807259	0.0969858	0.0275	0.0833042	0.0409013	0.0475	0.0332603	0.0275	0	0.03	0	0	0	0	0	0.03	0.0348807	0.0844961	0	0.025	0.0355903	0	0	0	0	0	0	0	0	0.03	0	0.0566238	0.0686021	0.0225	0	0	0.025	0	0	0	0
Solyc01g005720	0.3		0	0	0.03	0.0275	0.0375278	0.0531311	0.0919579	0.0551513	0.0275	0.0919239	0.0283945	0	0	0.0275	0	0.03	0	0	0	0	0	0.03	0.0275	0.0337577	0	0.025	0.025	0	0	0	0	0	0	0	0	0.03	0	0.0275	0.0686021	0	0	0	0.025	0	0	0	0
Solyc01g005730	0.106667		0	0	0	0	0	0	0	0	0	0	0.034641	0	0	0.0275	0	0	0	0	0	0.0275	0	0.0575	0	0	0	0	0	0	0	0	0	0	0	0	0.0375	0	0	0	0	0	0	0	0	0	0	0	0
Solyc01g005740	0.03		0	0	0	0	0	0	0	0	0	0	0	0	0	0	0	0	0	0	0	0	0	0	0	0	0	0	0	0	0	0	0	0	0	0	0.025	0	0	0	0	0	0	0	0	0	0	0	0
Solyc01g005750	0.1325		0	0.0259808	0	0	0	0	0	0	0	0	0	0	0	0	0	0	0	0.02	0.0201556	0	0	0	0	0	0	0	0	0	0	0	0	0	0	0	0	0	0	0	0	0	0	0	0	0	0	0	0
Solyc01g005760	2.11667	Expressed	0.235867	0.0325	0.0611692	0.0603462	0.0337577	0.0765261	0.0275	0.0755397	0.0275	0.11669	0.0778219	0.0225	0	0.0575	0.025	0.06	0.121152	0	0	0	0.0517204	0.0731864	0.0554527	0.00853913	0.0355903	0	0.0262996	0	0.0325	0	0	0	0.111405	0	0	0.0449768	0.0325	0.0755397	0.0278014	0.04272	0	0.03	0	0	0	0	0
Solyc01g005770	17.16	Expressed	0.990774	0.177106	0.0688598	0.173175	0.0434933	0.0692068	0.0459166	0.169331	0.0558271	0.115208	0.177106	0.0379693	0.096036	0.229941	0.127957	0.111056	1.01799	0.113908	0.275439	0.229905	0.138022	0.0939304	0.0915605	0.0885532	0.0966523	0.0909556	0.068374	0.106262	0.0394493	0.103793	0.106017	0.129124	0.774711	0.079652	0.156651	0.100457	0.176068	0.15559	0.0853913	0.0765261	0.0731437	0.0701189	0.0442531	0.136527	0.0370529	0.0531507	0.0604669
Solyc01g005780	0.29		0.0811035	0.0325	0.0497494	0.025	0.0919579	0.0327872	0	0.0332603	0	0	0	0	0	0	0.03	0	0.0333333	0.0857686	0.0675	0	0.045	0.03	0.0575	0	0.025	0	0.035	0	0	0	0	0	0.0233333	0	0	0.045	0.0325	0.0246221	0	0	0	0	0	0	0	0	0
Solyc01g005790	7.055	Expressed	0.764773	0.41363	0.727912	0.345362	0.122916	0.296939	0.638299	0.164336	0.597495	0.326471	0.327249	0.353727	0.508959	0.387242	0.269985	0.334175	0.726667	0.225772	0.288946	0.461673	0.400237	0.731465	0.295166	0.520721	0.633066	0.380449	0.454998	0.176068	0.110406	0.0931844	0.198158	0.508714	0.565184	0.19342	0.60475	0.596657	0.420067	0.257973	0.497268	0.414676	0.0839643	0.296349	0.338708	0.451966	0.262246	0.144568	0.371335
Solyc01g005800	26.97	Expressed	0	0.126186	0.215793	0.144539	0.117118	0.518572	0.837665	0.119059	0.758742	0.210119	0.0704746	0.795784	0.20742	0.07587	0.135984	0.0812788	0.0333333	0.220279	0.178769	0.268157	0.0648074	0.104273	0.145402	0.035	0.131426	0.105069	0.18071	0.27768	0.104243	0.0332603	0	0.0319831	0.542719	1.21034	0.0878801	0.157076	0.0322749	0.117651	0.0469707	0.0225	0.0757738	0	0	0.0981495	0	0	0
Solyc01g005810	144.615	Expressed	19.8047	2.53684	1.94752	5.50842	3.4949	8.47297	6.22844	5.12547	4.3615	2.82185	4.63615	5.69757	0.819807	1.63106	2.48262	1.57604	29.5414	4.18285	3.79816	4.50779	4.19454	7.91738	1.64297	4.70511	8.93554	3.86075	3.95737	4.98048	4.7152	2.80791	2.20732	6.10162	2.494	9.17449	1.98651	5.1318	2.18671	2.1416	3.06835	4.4402	1.00275	0.913358	4.0141	2.48529	2.43385	3.20906	2.57062
Solyc01g005820	392.31	Expressed	19.0825	21.309	26.2915	10.004	9.61223	9.8888	10.1277	12.986	5.16832	10.7576	9.79175	10.9386	3.85756	5.88784	14.5218	2.28363	23.6913	8.78884	19.5506	23.9981	9.25466	2.09702	6.90791	9.98468	5.67004	9.35381	10.8779	5.37325	7.02896	5.57957	9.48058	12.9171	26.0483	22.1849	22.023	10.1849	10.2135	3.02113	3.68555	3.03828	3.03996	3.40035	3.8245	5.53306	4.45989	3.88095	4.38154
Solyc01g005830	81.5575	Expressed	2.02143	4.40957	1.56626	0.83314	1.24829	0.308798	1.13844	1.39621	1.2577	0.836883	1.78211	0.739982	1.03249	0.575536	1.28575	0.450581	5.91442	4.39185	2.43204	1.71505	1.14463	0.616036	1.63423	1.62612	0.98262	1.71531	1.19287	0.989667	0.426993	0.921813	1.11162	0.756972	1.19249	2.7878	0.860286	1.92026	1.68776	0.812983	1.03723	0.856125	0.311405	1.00594	0.183774	0.439002	0.474454	0.955153	0.773676
Solyc01g005840	40.22	Expressed	3.4868	2.50892	0.915241	0.717438	0.563338	0.540108	0.970717	0.850013	1.64598	0.941192	0.558739	0.764139	0.65479	0.396926	1.19998	0.231319	11.4868	0.61659	0.646619	1.62651	1.21908	0.332074	0.914722	0.503885	0.744564	0.57872	0.271815	0.991979	0.358454	0.755275	0.83272	1.25244	1.48312	0.847014	0.188149	0.570796	0.452555	0.394385	0.640291	0.511409	1.03319	0.130024	0.338978	1.47794	0.482552	1.08096	0.912323
Solyc01g005850	1.905	Expressed	0	0.171288	0.120173	0.0849019	0.281129	0.201225	0.265926	0.210099	0.178296	0.158771	0.17825	0.0551513	0.0548293	0.0727295	0.0829031	0.119748	0	0.116798	0.162192	0.452647	0.11098	0.177922	0.124399	0.152233	0.284382	0.0476751	0.189753	0.0695671	0.119931	0.0875952	0.137992	0.10858	0	0	0.195336	0.334374	0.170801	0.0898494	0.122644	0.0894893	0.1125	0.109772	0.0905884	0.117863	0.0617792	0.0352077	0.133822
Solyc01g005860	0.193333		0	0	0	0	0	0	0	0	0.0275	0	0	0	0	0	0	0	0	0	0	0	0	0	0	0	0	0	0	0	0	0	0	0	0	0	0	0.0225	0	0	0	0	0	0	0	0	0	0	0
Solyc01g005870	3.31333	Expressed	0	0.0225	0.1175	0.0440643	0.158981	0.214884	0.048734	0.0672526	0.0993626	0.0988581	0.198132	0.0722265	0.0309233	0.0968676	0.05	0	0	0.0275	0.0303795	0.105	0.115569	0.25984	0.103037	0.136809	0.05058	0.0320156	0.03966	0	0	0.041508	0	0	0	0	0	0	0.0325	0.0505594	0.025	0.0291548	0.0303795	0	0	0	0	0	0
Solyc01g005880	0.0575		0	0	0	0	0	0.0325	0	0	0	0	0.03	0	0	0	0	0	0	0	0	0	0	0	0	0	0	0	0	0	0	0	0.03	0	0	0	0	0	0	0	0	0	0	0	0	0	0	0	0
Solyc01g005890	0.0575		0	0	0	0	0	0	0	0	0	0	0	0	0	0	0	0	0	0	0.0337577	0	0	0	0	0	0	0	0	0	0	0	0	0	0	0	0.02529	0	0	0	0	0	0.0303795	0	0	0	0	0	0
Solyc01g005900	30.8133	Expressed	2.36965	0.755528	0.413481	0.659133	0.190236	0.591728	0.406169	0.32014	0.582051	0.260432	0.3568	0.322578	0.60957	0.220492	0.497416	0.142653	3.91263	0.595105	0.392924	0.0851836	0.735293	0.519792	0.292717	0.678681	0.348721	0.500675	0.458428	0.59146	0.508353	0.376129	0.300565	0.290154	2.24317	0.356417	0.443415	0.652112	0.286429	0.524571	0.291705	0.373171	0.19666	0.25937	0.288531	0.401712	0.129035	0.328186	0.286371
Solyc01g005910	48.6067	Expressed	4.57806	0.808342	0.707419	0.645308	1.2489	0.381737	0.606726	0.88683	0.876512	0.663344	0.957483	0.754568	0.922501	1.16978	0.153677	0.565131	15.8426	0.744496	0.77255	0.61883	0.459826	0.699536	1.20683	0.762004	0.603352	0.603343	0.934568	0.916974	0.576214	1.04188	0.648516	0.983119	7.01945	2.41689	0.710669	1.36691	0.932884	0.687003	0.110482	0.640267	0.296321	0.384079	1.00619	0.304368	1.05794	0.800521	1.15636
Solyc01g005920	4.4375	Expressed	0.04	0.0643558	0.14991	0.171148	0.0957862	0.141745	0.118919	0.211128	0.105948	0.0377492	0.0149304	0.163777	0.130384	0.125192	0.0671441	0.0531507	0.0608276	0.0695821	0.106849	0.266302	0.148717	0.130256	0.0911958	0.424931	0.130791	0.0967385	0.239318	0.0827144	0.0688446	0.110028	0.0533073	0.05058	0	0	0.0898494	0.108128	0.0625	0.0228674	0.0711805	0.0842986	0.0320156	0.0783688	0.0478714	0.0225	0.035	0.0520216	0.0361421
Solyc01g005930	31.22	Expressed	2.34319	0.189978	0.478226	0.785329	0.658572	0.388544	1.0975	1.58393	1.30447	1.39091	1.32348	1.63176	1.01339	2.59062	2.81728	1.46423	0.539269	0.407582	0.190892	1.18101	0.719323	0.434492	0.42596	0.727592	0.721694	1.13059	0.686258	0.804182	1.38408	0.993768	1.20047	1.22127	0.836985	0.192383	0.437214	0.606039	1.48338	0.542408	0.379627	0.637221	0.600061	1.4887	0.439213	0.856051	0.974178	1.85598	1.34847
Solyc01g005940	7.31333	Expressed	0.901708	0	0	0	0	0	0.0225	0	0	0	0	0	0.0225	0.0275	0	0.0309233	1.21344	0	0	0.025	0	0	0	0	0	0.015	0	0	0	0.025	0	0.0125	0.622923	0.16905	0.0175	0.0275	0	0	0	0	0	0	0	0	0	0	0.0225
Solyc01g005950	85.7875	Expressed	1.34315	2.54532	1.98047	1.58408	1.80009	1.98391	2.3097	2.16706	1.78818	2.24734	1.63764	3.1261	1.60718	0.686895	1.86794	2.15064	7.50558	2.80058	1.86829	0.998557	1.60643	3.09494	2.51943	2.87299	1.83051	1.75839	2.15126	3.67375	2.65035	0.395314	1.48471	3.42463	1.98187	2.25587	2.53454	2.34678	1.30701	1.59676	1.19049	1.74529	0.892777	2.15645	2.52447	0.671868	1.66	1.76214	1.62228
Solyc01g005960	200.313	Expressed	11.2061	1.45719	0.711739	0.711013	1.53311	1.56287	0.990008	0.432493	1.16931	1.84579	1.50616	0.422779	2.39539	0.678116	2.22994	0.936932	43.5002	2.69483	1.65618	1.88146	1.22238	2.35985	1.17729	2.08753	0.95306	2.27873	0.892901	1.37473	1.16656	1.14389	2.04226	2.14043	43.9133	15.7548	2.64545	1.34802	1.21164	1.49225	0.48307	1.76208	1.17928	1.49246	0.90661	1.73669	1.811	0.943663	1.62151
Solyc01g005970	21.4367	Expressed	2.97891	0.550521	0.472112	0.623926	0.568058	0.379967	0.778679	0.651191	0.353707	0.715315	0.583009	0.432685	0.539079	0.639068	0.52344	0.210178	2.26184	0.600935	0.186698	1.1431	0.500982	0.566929	0.649582	0.434384	0.531868	0.4875	0.953558	0.314494	0.652406	0.354988	0.192722	0.5791	3.73653	1.28905	0.413088	0.477866	0.7905	0.703022	0.783736	0.351885	0.355282	0.688101	0.157215	0.283001	0.21546	0.454221	0.382108
Solyc01g005980	18.51	Expressed	0.565184	0.259338	0.398424	0.396219	0.478668	1.20552	1.15039	0.434346	0.589666	0.589527	0.332725	0.732523	0.351885	0.242018	0.181223	0.241971	0.0608276	1.27878	0.334025	0.531201	0.404691	0.556842	0.658931	0.351743	0.779332	0.675457	0.52944	0.584827	0.271109	0.207465	0.133627	0.0868907	0.283608	0.0800694	0.54931	0.727559	0.707582	1.12649	0.452079	0.738561	0.306186	0.32722	0.127565	0.1614	0.116512	0.0493288	0.128736
Solyc01g005990	327.333	Expressed	15.2365	1.88467	1.85381	1.34826	0.811757	0.803258	0.638984	0.7425	0.635702	0.542208	0.304477	0.0440407	0.0332603	0.0242813	0.0287228	0.0309233	7.60933	2.34507	1.30262	0.574906	1.04035	1.34323	0.885084	0.478513	0.58968	0.528274	0.358268	0.0406971	0.0348807	0.0332603	0.0275	0.0125	0.30348	0.38843	0.465125	0.184589	0.234179	0.132689	0.210807	0.108051	0.0225	0.0347311	0.0478714	0.0246221	0	0	0
Solyc01g006000	30.5925	Expressed	2.7121	0.946066	0.782787	0.57019	1.06476	0.677452	1.31869	0.759697	1.56266	1.51134	0.825212	1.00454	1.10472	1.05829	0.808801	0.553662	8.36099	0.819923	0.25617	0.340156	0.426165	1.47086	1.34315	1.29515	1.64387	1.52399	1.21266	0.860271	0.779951	0.971746	0.883902	3.07325	1.95536	0.81224	0.458519	0.922253	0.871804	0.446568	0.980267	0.782191	0.64221	0.523981	0.301202	0.454228	1.30903	0.275481	0.676244
Solyc01g006010	52.15	Expressed	7.14444	1.13155	1.99186	0.8954	3.59215	2.42197	2.42342	1.90448	0.889049	1.54036	0.590692	2.18089	3.22089	0.560452	3.47981	1.61964	0.490997	1.22286	2.39814	5.51371	1.03427	2.63962	1.86434	2.8312	3.15899	1.68962	2.32537	1.08796	1.94126	1.88549	3.44678	3.00681	2.71115	1.24187	2.45488	1.98264	2.04142	0.627123	2.42961	1.83841	0.903816	1.44034	0.835089	1.15591	1.58287	3.02444	1.86624
Solyc01g006020	85.06	Expressed	6.67593	4.07059	3.94574	2.16433	1.28091	2.74732	1.2554	2.42561	1.73096	0.995142	0.494037	2.23678	2.22746	1.10603	2.16976	1.79905	15.0466	2.11983	3.54386	3.5141	0.733285	1.42048	1.13211	2.10622	2.04472	2.48107	3.29727	1.73838	2.59094	2.08093	1.75354	2.31344	21.5214	2.63253	2.99639	3.14568	1.15705	3.44834	3.27061	1.88641	1.35118	1.60853	1.18151	1.541	1.7055	1.6492	1.15535
Solyc01g006030	44.4175	Expressed	0.449642	0.525119	1.02561	0.506497	1.45764	0.764694	1.10809	0.330076	0.914243	0.594657	1.55659	0.787512	1.09788	0.749956	1.23006	1.35169	1.62802	1.58601	1.60115	1.04301	0.638997	1.08238	0.696401	0.986799	0.804291	0.678016	1.10545	0.640005	0.457117	0.473225	0.580948	2.05305	0.931957	0.373229	1.11239	0.818841	0.974204	0.885386	1.17271	0.380994	0.594678	0.827812	0.588535	0.602419	0.338265	0.305996	0.608639
Solyc01g006040	48.4175	Expressed	0	1.3927	1.2573	0.633474	1.39792	0.565087	0.849186	0.861742	0.726468	1.3837	1.17383	0.634841	1.44242	1.18445	0.500042	1.05351	0	1.22324	1.56351	0.654668	0.93318	1.02696	1.42721	0.956543	0.444428	0.54431	1.62678	0.532181	1.11999	0.759642	0.418935	0.579144	0.24538	0.0833333	1.00496	2.04115	0.76369	1.12988	1.30729	0.8224	0.89093	1.27529	0.994694	1.21216	0.771485	0.864186	0.931651
Solyc01g006050	4.92	Expressed	0	0	0	0	0	0	0	0	0	0.0325	0.03	0.201799	0.0193649	0.113798	0.0915036	0.135547	0	0.0225	0	0	0.0225	0.03	0.0325	0	0	0	0	0.02	0	0	0	0.0165831	0	0	0.0355903	0.045	0.0375278	0	0.0225	0.0225	0	0.03	0	0.02	0	0.0275	0
Solyc01g006060	622.257	Expressed	0.206667	0.392768	0.132877	0.184769	0.102021	0.0165202	0.0291548	0.0317543	0	0	0.0225	0	0	0	0	0	1.87763	0.43828	0.157083	0.176559	0.0663796	0.0558271	0.0558271	0.0355903	0	0.025	0.02	0	0	0	0	0	0.0233333	0.379532	0.115353	0.0275	0	0	0	0	0	0	0	0	0	0	0
Solyc01g006070	0.12		0	0.0430842	0	0.0275	0	0	0	0	0	0	0	0	0	0	0	0	0	0	0	0	0	0	0	0	0	0	0	0	0	0	0	0	0	0	0	0	0	0	0	0	0	0	0	0	0	0	0
Solyc01g006080	5.88	Expressed	0	0.0325	0.0275	0.0275	0.0525	0.0409268	0.0325	0	0.0275	0.025	0.03	0	0	0	0	0.06	0	0.02	0.0253311	0.0645981	0	0	0	0	0	0	0.025	0	0	0	0	0	0	0	0.0298608	0.0392641	0.065	0.02	0	0.0275	0	0	0	0	0	0	0
Solyc01g006090	17.36	Expressed	4.92938	0.919941	1.14581	0.807821	1.11308	0.554292	0.600671	0.41013	0.595222	0.866324	0.192067	0.172886	0.283795	0.430859	0.17647	0.613711	2.38204	0.76063	1.05191	1.20815	0.344734	0.396072	0.357969	0.523498	0.714522	0.5325	0.367537	0.0985309	0.387435	0.448423	0.304111	0.344562	1.57991	0.799937	0.954677	1.10743	0.427695	0.499283	0.675813	0.285949	0.274029	0.128995	0.30711	0.213092	0.151017	0.0877852	0.301924
Solyc01g006100	58.81	Expressed	1.6729	3.90896	1.34689	0.28349	0.39559	0.435364	0.491992	0.588634	0.522149	0.718823	0.655952	0.204221	0.11199	0.133323	0.0775672	0.0704746	2.84693	3.11977	0.710839	0.427454	0.260716	0.386617	0.338489	0.554407	1.01572	0.443415	0.394047	0.03966	0.143236	0.0782491	0.172119	0.19929	0.28006	1.57969	1.03236	0.542602	0.407799	0.18163	0.180618	0.435	0.0334166	0.120623	0.151733	0.0555278	0.0366003	0.0175	0.045712
Solyc01g006110	112.207	Expressed	2.70661	1.26943	2.74404	0.986332	3.01862	1.99522	3.5923	1.16197	2.9993	3.65166	4.40295	1.0992	2.05718	7.37742	2.84825	1.97565	2.48155	2.81333	2.21017	2.80155	2.49739	5.26621	2.38358	4.7568	6.42541	11.407	6.4147	1.90053	1.76141	1.27277	5.68637	3.76517	1.08772	0.583276	3.12301	2.23237	1.37007	1.93934	1.97395	3.04502	2.02091	1.90106	1.8892	2.86711	4.15001	1.90906	4.88681
Solyc01g006120	306.485	Expressed	5.10444	5.80438	5.05809	2.31193	2.87152	0.512787	1.92694	3.1762	1.6279	1.81775	5.57102	8.13259	2.28718	3.18526	7.43872	2.14653	6.99377	8.15249	4.45078	9.67745	3.20283	4.92924	5.63969	3.07542	3.79336	7.54003	3.52086	5.42458	6.51635	8.09138	6.36579	7.44001	28.0292	2.07837	3.54019	3.54844	2.93082	5.41583	2.27243	0.982692	3.18658	5.24739	1.78455	2.63159	2.32765	4.67142	2.28251
Solyc01g006130	106.907	Expressed	1.70839	1.88211	4.8728	5.11804	2.69606	5.72641	4.24205	4.08833	3.45651	1.46481	3.77448	5.02694	2.29681	1.35154	2.41824	0.703792	2.00939	4.48783	2.17237	3.23547	1.87311	6.78921	3.08834	5.79595	4.71599	2.94826	4.58706	1.42782	2.87208	3.49519	1.6102	3.70148	1.53735	1.41841	4.52361	3.10102	2.65608	2.38415	1.44174	4.11566	0.917846	1.21621	1.99355	2.02408	2.06449	1.85511	1.40195
Solyc01g006140	8.2	Expressed	0.944887	0.220166	0.268716	0.208746	0.194052	0.167699	0.338735	0.200557	0.118489	0.304124	0.201634	0.191377	0.0997079	0.0976815	0.280041	0.192023	0.24835	0.545481	0.283622	0.216732	0.223923	0.107887	0.242023	0.148401	0.143025	0.0976388	0.266939	0.137386	0.293073	0.0956012	0.246864	0.220279	0.294637	0.380102	0.266145	0.250678	0.17294	0.279922	0.099373	0.0611692	0.133315	0.0490535	0.152117	0.129382	0.0601907	0.16755	0.109125
Solyc01g006150	64.4633	Expressed	2.76782	2.28698	2.84063	1.86912	1.69842	1.46066	0.441689	0.633167	0.775332	0.433385	0.627601	0.602391	0.581163	0.196018	0.306553	0.654235	3.25826	1.73693	0.489104	0.70704	1.00976	0.579468	0.344553	0.661846	1.12411	1.33251	0.994547	0.870444	0.500023	0.363479	0.35069	0.799295	0.879476	0.774216	0.541931	0.717175	0.442406	0.369783	1.92394	0.793981	1.63672	0.862915	1.45531	1.63774	1.49961	1.2481	0.880559
Solyc01g006160	3143.08	Expressed	30.3638	50.8665	8.98584	25.3687	11.3953	3.71008	6.87285	6.23029	10.5984	4.62434	29.8221	7.68602	17.2346	10.9247	6.72044	2.93218	54.8397	25.5801	30.4894	24.5692	9.40755	13.1881	13.2802	7.0643	13.2613	17.8414	11.7359	3.64399	2.56493	0.858559	4.48307	3.33388	15.7285	186.268	15.3951	8.6272	13.5294	8.82036	3.06534	6.79778	6.88321	6.94284	17.7917	5.48138	8.03202	11.3814	8.75179
Solyc01g006170	97.18	Expressed	9.43291	7.93899	5.47976	9.89528	9.21911	7.70804	6.31752	2.25047	5.11102	1.11807	16.7377	0.836804	18.1989	7.16047	8.72854	4.92804	7.44782	4.60565	3.2782	4.90322	2.78771	8.06628	5.92141	8.37109	9.20163	6.6657	8.05557	2.08124	1.70924	3.70672	1.84519	2.12448	2.67785	9.49558	3.38452	2.01635	7.53903	8.70458	4.09597	6.83452	4.78443	3.20423	9.29912	5.96833	8.72274	6.13372	3.04417
Solyc01g006180	17.125	Expressed	2.05629	0.799234	0.913331	0.641203	0.824914	0.737082	0.679919	0.680164	0.582595	1.00252	0.814866	0.177036	0.472094	0.426368	0.472835	0.521047	2.68024	1.32887	0.925279	1.17712	1.07569	0.811383	0.311378	1.27498	0.987931	0.769159	1.16728	0.306115	0.317044	0.143258	0.545151	0.681816	4.82043	0.656074	1.38909	0.853662	0.726308	0.824707	0.484843	0.858762	0.338305	0.26927	0.892875	0.34471	0.113908	0.216217	0.141451
Solyc01g006190	243.26	Expressed	11.1788	1.15992	0.684073	1.18923	1.25031	1.63618	1.12641	1.49201	2.50438	1.83664	0.896535	2.83112	1.43626	2.35194	2.97949	2.57442	16.5146	3.00995	1.31968	1.13076	0.946876	1.8665	2.04012	1.4771	1.04317	1.33493	1.78554	1.66232	1.81867	1.71063	0.779854	1.90215	14.6735	10.3474	0.8665	1.18383	1.17213	0.914139	1.05823	0.507182	1.30656	2.39523	1.23341	1.59415	3.68623	1.81862	2.42771
Solyc01g006200	19.11	Expressed	7.22929	0.43142	0.245798	0.497603	0.265738	0.264996	0.247083	0.365567	0.536522	0.611099	0.521296	0.165454	0.360208	0.691826	0.277744	0.480443	3.87843	0.418756	0.294392	0.699981	0.151493	0.241971	0.348936	0.50386	0.746241	0.363808	0.569728	0.450396	0.677114	0.178092	0.554187	0.332124	0.533458	1.33698	0.210891	0.423996	0.424755	0.295776	0.499917	0.47484	0.405874	0.249412	0.496479	0.284297	0.727741	0.346145	0.160987
Solyc01g006210	9.6775	Expressed	1.82965	0.362514	0.360194	0.271366	0.336749	0.246927	0.193585	0.146138	0.0154785	0.0761577	0.231984	0.143375	0.16575	0.158028	0.188878	0.190016	1.52919	0.602763	0.304275	0.404496	0.255551	0.255388	0.116288	0.149241	0.1375	0.191507	0.243875	0.164336	0.0721543	0.106849	0.112879	0.0899537	0.538403	0.927817	0.333679	0.25364	0.18701	0.14103	0.24428	0.0533073	0.159027	0.0996975	0.223098	0.0983616	0.0324037	0.0696868	0.111906
Solyc01g006220	19.0133	Expressed	2.27506	0.996204	0.98653	0.629993	0.654298	0.575954	0.309192	0.482863	0.234716	0.456004	0.333529	0.167606	0.343011	0.268251	0.317201	0.122474	7.72729	1.05594	0.338797	0.481015	0.393679	0.25339	0.564882	0.124992	0.184572	0.185338	0.159739	0.0881641	0.229728	0.143781	0.126128	0.230181	0.824345	0.945851	0.677077	0.410498	0.283093	0.278702	0.209459	0.469698	0.337812	0.246543	0.231206	0.224666	0.337204	0.0876546	0.0518612
Solyc01g006230	172.05	Expressed	5.47051	1.59788	0.953558	0.104513	1.43631	0.717141	2.06121	0.482269	1.2674	2.73261	4.20306	3.80426	3.50096	3.10244	1.12117	0.561625	18.9276	1.11399	1.05721	1.25009	0.482589	0.832872	1.32586	1.06241	2.37306	1.88881	2.07407	2.04334	3.08922	0.949017	2.39587	3.20239	16.835	3.60602	0.867903	0.538841	0.710059	0.746686	1.54109	2.03061	1.47265	2.08351	1.35786	2.36737	2.18481	1.90791	1.47548
Solyc01g006240	13.2525	Expressed	0.38371	0.19906	0.109573	0.56676	0.139963	0.16109	0.159269	0.214063	0.0317543	0.130767	0.201225	0.0348807	0.0798436	0.11619	0.0675	0.0292617	0.793242	0.434406	0.363559	0.285814	0.100861	0.0833042	0.148408	0.208826	0.0306526	0.147047	0.215305	0.0517204	0.0366003	0.0572094	0	0	0.0751295	0.103655	0.0899421	0.0931285	0.0657489	0.041508	0.0905539	0.0497494	0.0225	0.0332603	0.025	0	0	0	0.0175
Solyc01g006250	50.845	Expressed	0.298347	0.479225	0.128606	0.292955	0.103401	0.455638	0.209145	0.198971	0.204308	0.380819	0.161374	0.477092	0.224216	0.412318	0.178109	0.22723	0.206908	0.112574	0.146799	0.128606	0.349389	0.496806	0.226936	0.334228	0.39099	0.173895	0.148682	0.184046	0.366819	0.285726	0.28883	0.367854	0.58834	0.14678	0.372268	0.57872	0.452942	0.326356	0.422007	0.228122	0.380887	0.487637	0.346999	0.185354	0.264807	0.0680686	0.20039
Solyc01g006260	8.785	Expressed	0.638235	0.577442	0.582423	0.326736	0.562826	0.406148	0.65971	0.440253	0.218989	0.11919	0.0386221	0.186341	0.12816	0.188564	0.163471	0.193923	1.351	0.192153	0.471434	0.502867	0.230091	0.477825	0.345865	0.285336	0.399677	0.311154	0.331575	0.348736	0.128541	0.0924662	0.238432	0.332403	0.573653	0.582018	0.286426	0.289209	0.421374	0.109545	0.487963	0.268991	0.211832	0.148352	0.177077	0.117011	0.245709	0.140624	0.224513
Solyc01g006270	0.616667		0	0	0	0	0	0	0	0	0	0	0	0	0.03	0	0.03	0	0	0	0	0.0275	0	0	0	0	0	0	0	0	0	0	0	0	0	0	0	0	0	0	0	0	0	0	0	0.0225	0.0666302	0	0
Solyc01g006280	595.28	Expressed	5.17232	1.01075	3.01985	1.95515	2.58446	7.95453	5.30306	5.81704	4.91569	3.99856	8.82884	12.3954	14.7555	8.26962	16.3064	7.16023	27.8583	1.94297	5.38951	7.41696	7.62121	6.12539	2.3733	5.97398	4.98044	4.19646	3.68506	29.4939	27.6582	27.0216	4.16971	27.2253	48.8878	5.24179	4.60297	4.57985	8.04905	8.25072	11.7542	14.7261	13.4956	11.8239	11.7674	34.5081	48.9036	33.1172	33.2697
Solyc01g006290	11.0325	Expressed	0	0.0249583	0.12	0.139007	0.0551324	0	0.0475	0	1.89505	1.27303	0.225402	0.333851	0.113321	0.251446	0.06408	0.0339116	0	0.0110868	0.025	0.220355	0	0	0.0778219	0	0.484166	0.444192	0.144366	0.093675	0.0834041	0.0793725	0.0749444	0.0839643	0	0	0.0175	0.0453459	0.0325	0.429561	1.83851	0.521382	1.12433	2.97313	2.1769	0.935815	0.828768	0.75421	0.60879
Solyc01g006300	4.5325	Expressed	0.0933333	0	0	0.0409013	0.025	0.0225	0.0225	0	0.367319	0.245302	0.0291548	0.224179	0.0755397	0.155	0.03	0	0	0.0272336	0.0325	0.0409013	0.0325	0	0	0.025	0	0	0	0.0225	0.0319831	0.0275	0.03	0.025	0	0	0	0.14	0.0600694	0	0	0.0275	0	0.0332603	0	0	0	0.0175	0
Solyc01g006310	0.0225		0	0	0	0	0	0	0	0	0	0	0	0	0	0	0	0	0	0	0	0	0	0	0	0	0	0	0	0	0	0	0	0	0	0	0	0	0	0	0	0	0	0	0	0	0	0	0
Solyc01g006320	32.55	Expressed	2.9464	2.84976	0.897315	0.592627	0.360127	0.223881	0.09268	0.348984	0.209777	0.174857	0.148043	0.0961336	0.0856835	0.0847054	0.0821584	0.0578792	1.57411	1.53649	0.493373	0.409743	0.151183	0.0547723	0.239213	0.068678	0.319306	0.153806	0.0816497	0.116154	0.100125	0.0510514	0.0352077	0.0298608	0.250488	0.407608	0.202335	0.203265	0.0771767	0.0279881	0.0303795	0.0642099	0.0275	0.03	0	0.0225	0.0275	0.0175	0
Solyc01g006330	11.8025	Expressed	0.207391	0.680862	0.170929	0.292888	0.177904	0.188475	0.102744	0.134001	0.119609	0.0075	0.146593	0.0491596	0.0927699	0.0561805	0.135339	0.0942956	0	0.351212	0.449877	0.475243	0.204751	0.150076	0.0680686	0.132689	0.0710634	0.101355	0.0476751	0.102174	0.05	0.134226	0.0460751	0.0939304	0.03	0.262742	0.490994	0.501604	0.230484	0.0845577	0.158403	0.127835	0.03	0.0514782	0.056421	0.0827144	0.0877021	0.0253311	0.0840015
Solyc01g006340	18.9433	Expressed	1.68038	0.312237	0.580048	0.338698	0.8646	0.510333	0.511273	0.70471	1.27832	1.05728	0.743229	1.06121	0.789673	0.609431	0.659108	0.23372	2.12653	0.885856	0.568248	0.118814	0.415782	0.600201	0.778004	0.482932	0.267687	0.635859	0.251611	0.318172	0.51164	0.328288	0.658703	0.859137	1.40094	1.28066	0.396871	0.107422	0.446699	0.761133	0.420503	0.722282	0.198053	0.469938	0.468019	0.854472	0.484017	0.455657	0.580709
Solyc01g006350	139.127	Expressed	6.46226	3.89562	1.47858	2.70593	4.82604	7.83546	1.44667	5.33873	2.49507	2.91085	1.47939	1.84732	5.43275	3.69024	3.01726	2.91888	22.7618	5.16194	2.35579	2.36361	1.97358	2.54459	7.71132	3.06388	4.09628	4.28255	3.02327	0.899338	3.66597	1.97014	2.58748	4.75079	6.0321	3.42102	2.05133	2.80195	1.8929	2.58069	4.6895	2.41269	1.95785	3.39294	1.23581	1.53763	4.11985	0.90784	1.17831
Solyc01g006360	69.275	Expressed	0.206667	1.1001	0.931812	1.22405	0.50773	1.01996	1.5164	3.36284	0.536307	2.58171	1.45695	1.05871	3.06108	1.73692	2.43826	1.78272	0.327736	0.927051	1.17744	3.36918	2.26835	1.5087	5.41778	3.08595	1.31243	1.01777	1.47745	1.40225	1.63544	2.35011	1.02561	3.12282	1.92262	0.773585	1.40363	1.32845	1.59213	1.80198	2.42651	2.9084	2.02831	1.69404	1.03209	0.372615	2.32305	0.628159	0.359861
Solyc01g006370	470.678	Expressed	3.41369	17.2236	20.3731	4.72267	5.24475	7.8465	7.29164	5.37136	7.7119	7.3467	8.09692	1.8893	6.52426	1.85912	5.18241	2.8419	6.49027	17.658	16.0917	14.5358	10.657	3.94108	22.5206	12.2067	3.36947	8.50504	8.27822	3.57999	5.60356	0.974332	1.5964	3.82083	1.55445	1.35998	18.6613	3.20732	8.49343	5.00069	7.84381	4.75348	1.08582	4.49218	3.4156	1.98575	0.744362	0.683337	1.39768
Solyc01g006380	2.7325	Expressed	0.04	0.169853	0.0579332	0.0409013	0.0473242	0.0325	0	0.0275	0	0.025	0	0.0225	0	0	0.03	0	0	0.108733	0.238205	0.0660177	0.0327872	0.0552834	0.0726292	0.0780491	0	0	0	0	0	0	0	0	0.03	0.0392994	0.141745	0.156045	0.0622328	0	0.0451617	0.045	0	0	0	0	0	0	0
Solyc01g006390	220.577	Expressed	15.456	2.57381	0.28523	0.0275	0.065	0.0325	0	0	0	0	0.03	0	0	0	0	0.06	8.06956	7.15681	0.545365	0.0517204	0.0225	0.108012	0.0275	0.025	0.035	0.0500625	0	0.0225	0	0	0	0.0125	2.08337	3.84986	0.668473	0.272133	0.0622328	0	0.0275	0.0325	0	0.0537548	0	0	0	0	0
Solyc01g006400	3742.88	Expressed	25.0743	382.619	393.577	12.8861	1.52356	0.620636	1.19279	0.344843	0.2392	0.672985	0.333079	1.66734	0.358849	0.0104083	0.445552	0.61441	34.4174	97.3013	550.674	112.718	2.06353	0.896921	0.612663	0.550401	1.13345	0.66605	0.403988	0.373419	0.186788	0.198725	0.476235	0.113459	34.6356	37.3049	129.82	10.7207	0.485258	0.209578	0.171974	0.366069	0.0731437	0.899911	0.13	0.064727	0.035	0.0459166	0.0217466
Solyc01g006410	3.5925	Expressed	0	0.0195789	0.0265754	0	0	0	0	0.0275	0	0	0	0	0.0225	0	0	0	0	0.02	3.51927	0.0575	0	0	0	0	0	0	0	0	0	0	0	0	0	0	0.0355903	0.0284312	0	0	0	0.0225	0	0	0	0	0	0	0
Solyc01g006420	0.025		0	0	0	0	0	0	0	0	0	0	0	0	0	0	0	0	0	0	0	0	0	0	0	0	0	0	0	0	0	0	0	0	0	0	0	0	0	0	0	0	0	0	0	0	0	0	0
Solyc01g006430	3514.56	Expressed	18.0554	38.0136	24.619	11.5968	29.7187	31.1738	28.9742	39.9681	7.03131	16.6627	11.9305	32.5003	20.4808	31.2334	23.571	32.0993	32.0883	24.5846	16.7102	7.78955	36.3189	75.0148	126.553	41.7274	43.2054	56.5879	47.2714	10.7977	17.1276	13.8543	10.1338	19.3686	54.3953	1.50771	19.8234	23.6558	25.7506	53.1954	45.4552	68.7913	5.71409	14.067	2.26593	8.43985	23.4716	15.263	14.4845
Solyc01g006440	2.515	Expressed	0	0	0	0	0	0.0225	0.0225	0	0.0275	0	0	0	0	0	0	0	0	0.0275	0.07	0.08	0.025	0.0825	0.0275	0	0	0	0	0	0	0	0.0275	0.0325	0	0	0.109649	0.0918672	0.0325	0	0.0525	0.04	0.0225	0.025	0.0513971	0.0325	0.0455293	0.0310913	0.02
Solyc01g006450	144.412	Expressed	5.71944	4.1255	2.22655	5.22737	3.15078	2.36523	0.294233	1.80871	1.06617	1.46056	0.912277	1.53625	3.857	1.34695	3.42814	2.33976	2.52765	1.75847	8.15768	5.16148	3.27042	0.83917	1.8638	1.57608	1.11245	1.51079	2.00681	0.810744	1.64438	1.40461	2.11248	2.11105	1.02265	2.22933	6.2132	3.36751	2.57466	0.9375	0.537184	1.79559	1.06844	2.83098	3.08072	1.21783	1.86676	1.52561	0.682508
Solyc01g006460	1.09667	Expressed	1.09667	0	0	0	0	0	0	0	0.0262599	0	0.0275	0.0430842	0.0273861	0.0225	0.03	0.0422295	0.03	0	0	0	0	0	0	0	0	0	0	0.04272	0	0.0275	0	0.0475	0	0	0	0.0262599	0	0	0.0275	0	0	0	0	0.0225	0.0325	0	0.02
Solyc01g006470	1.33	Expressed	0	0	0	0.0275	0	0	0	0	0	0	0	0	0	0	0	0	0	0	0.045712	0.0275	0	0	0	0	0	0	0	0	0	0	0	0.025	0	0	0.0443471	0.134931	0.0325	0	0	0	0	0	0	0	0	0	0
Solyc01g006480	14.5733	Expressed	3.45567	0.853722	0.371963	0.219032	0.525896	0.383696	0.955951	0.563669	0.502145	0.403774	0.43668	1.20186	0.471407	0.430337	0.485249	0.319492	1.76342	0.223532	0.909858	0.202772	0.567294	0.668772	0.579684	0.0847545	1.20158	1.31997	0.527265	0.703069	0.454469	0.502361	0.452226	1.3422	0.858856	0.818583	0.604793	0.631036	0.280754	0.932961	0.74268	0.750393	0.461237	0.482569	0.418178	1.00115	1.12062	1.05613	0.729673
Solyc01g006490	26.455	Expressed	0.892319	0.274632	0.704982	0.641059	0.604282	0.39957	1.37041	0.276959	1.94699	1.56523	1.02291	1.44264	0.7738	1.61565	2.48112	0.273507	2.80318	0.358594	0.671503	0.769116	0.755822	1.52052	1.37782	1.06739	1.43786	1.30061	0.567237	1.96398	2.69625	2.64265	2.23837	2.20398	5.46064	1.6929	0.435947	1.07114	0.733625	1.82823	0.798384	1.3541	0.946177	1.54244	1.13932	0.960855	0.997475	1.32996	1.04481
Solyc01g006500	10.9875	Expressed	0.635164	0.591847	0.421831	0.278609	0.710669	0.748325	0.652091	0.639759	0.373876	0.285435	0.73707	0.492212	0.451534	0.502809	0.2909	0.612677	1.4931	0.649744	0.501886	0.825897	0.771334	0.648652	0.35757	0.785211	0.768975	0.386803	0.254051	0.621388	0.662124	0.439972	0.334128	0.728137	0.14	0.0152753	0.674245	0.310118	0.348816	0.647654	1.18509	0.20308	0.553826	0.544631	0.467126	0.102987	0.884801	0.67003	0.343329
Solyc01g006510	223.433	Expressed	1.19453	1.55086	2.11679	0.929116	6.47163	1.96607	2.92014	2.64763	2.45119	2.42712	2.56746	0.856573	2.21258	1.8686	2.61622	2.93317	3.61689	1.82945	1.57173	3.18885	1.11189	2.77062	4.65087	3.89531	4.85318	2.81004	5.49617	0.6671	1.31209	3.51062	1.4932	1.46659	15.0216	0.502405	2.32678	3.92295	2.52828	1.91081	1.41436	1.33274	1.19877	1.11076	1.66107	2.33975	1.63876	1.43859	2.01177
Solyc01g006520	17.38	Expressed	1.2501	0.0673764	0.14648	0.39315	0.381475	0.244029	0.4174	0.792058	0.743163	0.583829	0.203204	0.143585	0.0779289	0.300749	0.0814964	0.135485	0.23	0.180601	0.359479	0.48122	0.172892	0.32556	0.262996	0.11636	0.555358	0.299486	0.18874	0.0781425	0.105079	0.089861	0.0670044	0.0651121	0.235891	0.335923	0.176511	0.415411	0.147669	0.0376386	0.0968999	0.0962094	0.0275	0.126524	0.0428904	0.0622328	0.0322749	0.0253311	0.0217466
Solyc01g006530	0.226667		0	0	0	0	0	0	0	0	0.0275	0	0	0	0	0	0	0	0	0	0	0	0	0	0	0	0	0	0	0	0	0	0	0	0	0	0	0	0	0	0	0	0	0	0	0	0	0	0
Solyc01g006540	1124.82	Expressed	0.453333	0.455876	1.15476	0.675364	0.333979	0.388609	0.188746	0.169558	13.9493	17.0158	9.36789	23.1724	108.799	25.2941	109.464	33.9935	1.89711	0.668493	1.87911	8.66041	0.802346	0.511246	0.642383	0.114555	37.6954	38.2628	20.125	47.9909	43.1451	28.1758	44.6395	22.3169	0.0917121	0	0.0596343	0.573256	1.01252	5.54924	4.78733	9.62777	15.7268	5.41	17.1949	6.68161	12.9174	8.24228	2.03218
Solyc01g006550	8.66333	Expressed	0	0	0	0.0275	0.252422	0.155798	0.324782	0.192889	1.38983	0.398382	0.42195	0.228742	0.119678	0.128128	0.232822	0.113238	0	0	0.0327872	0.0776075	0.113459	0.187105	0.147839	0.138984	0.194808	0.109801	0.116931	0.113459	0.109049	0.0987737	0.0463681	0.0787798	0	0	0	0	0	0.041508	0.0510514	0.0785679	0.0278014	0.0975	0.025	0.02	0	0.0275	0.025
Solyc01g006560	8.25	Expressed	0	0.367681	0.743029	0.262023	0.0998645	0.064727	0.0325	0.0558271	0.0291548	0.0325	0.0531507	0.181997	0.223397	0.178343	0.320478	0.238153	0	0.462392	1.50245	0.153107	0.0507239	0.0361421	0.0627163	0.03	0.0325	0.0320156	0.025	0.108244	0.0797261	0.101407	0.151079	0.108244	0	0	0.120312	0.0317543	0.0625	0.02	0.066128	0.0612883	0.0731864	0.0728583	0.0592136	0.0409268	0.065	0.0225	0.0417333
Solyc01g006570	0.03		0	0	0	0.025	0	0	0	0	0	0	0.03	0	0	0	0	0	0	0	0	0	0	0	0	0	0	0	0	0	0	0	0	0	0	0	0	0	0	0	0	0	0	0	0	0	0	0	0
Solyc01g006580	1.0275	Expressed	0	0	0	0.0225	0	0	0	0	0	0.0325	0	0.045712	0.0442295	0	0.0669577	0.0543139	0	0	0	0.05	0.0430842	0	0	0	0.035	0.0264575	0	0.0209662	0.035	0.0275	0.0275	0.025	0	0	0	0.086446	0.065	0	0	0.0275	0.03	0.055	0.0288675	0.0225	0.0366003	0.0303795	0.0225
Solyc01g006590	0.67		0	0	0	0	0	0	0	0	0	0	0	0	0	0	0	0	0	0	0	0	0	0	0	0	0	0	0	0	0	0	0	0	0	0	0	0	0	0	0	0	0	0.03	0	0	0	0	0
Solyc01g006600	89.47	Expressed	0	0	0	0	0.0275	0.0919579	0.0475	0	0.0275	0	0	0	0	0	0	0	0	0	0	0.0303795	0.184724	0.623236	0.0825	0.0361421	0.025	0.025	0.0644205	0	0.0675	0.0489898	0.055	0.0298608	0	0	0	0.136832	0.506826	0.0917764	0.316159	0.225772	0.145659	0.270905	0.0500625	0.0272336	0.0638357	0.0449768	0.0225
Solyc01g006610	78.785	Expressed	0	0	0.025	0.0972433	0.0783688	0.0325	0	0	0	0.0325	0	0.045712	0.0291548	0	0.0669577	0.0827647	0	0	0	0.452537	0.320998	0.807995	0	0.035	0.035	0.0125831	0	0.00288675	0.035	0.0275	0.0317543	0.025	0	0	0.057735	1.13435	0.923553	0.122023	0.140082	0.505822	0.0332603	0.0531507	0.0259406	0	0.0366003	0.0303795	0.0225
Solyc01g006620	2.1375	Expressed	0	0	0	0	0	0	0	0	0	0	0	0.0475	0	0	0	0	0	0	0.0275	0	0	0	0	0	0	0	0	0	0	0.02	0.0225	0.0225	0	0	0	0.0275	0.065	0	0	0.0566238	0.0225	0	0.0320156	0.02	0.07	0.0520216	0
Solyc01g006630	102.007	Expressed	4.22583	1.44193	2.46733	1.02792	1.0216	0.488791	0.689074	0.56637	1.25292	0.325372	0.773966	0.424588	1.2087	0.764668	0.766779	1.16503	24.878	1.64348	1.17099	1.7697	0.998711	0.977577	1.16358	1.06223	0.707747	0.534203	0.91262	0.945475	0.921678	0.966135	0.530886	0.793142	8.43962	9.66361	0.531923	1.98817	0.730392	0.497667	1.00565	0.761888	0.437978	0.552487	0.299844	0.549065	0.433827	0.295705	0.745196
Solyc01g006640	0.04		0	0	0	0	0	0	0	0	0	0	0	0	0	0	0	0	0	0	0	0	0	0	0	0	0	0	0	0	0	0	0	0	0	0	0	0	0	0	0	0	0	0	0	0	0	0	0
Solyc01g006650	13.2225	Expressed	0	0.243328	0.284268	0.144943	0.226164	0.299347	0.466394	0.443535	1.01432	0.666863	0.199306	0.453769	0.738516	0.282504	0.334016	0.413005	0.0333333	0.0579511	0.0672062	0.0687235	0.176275	0.198846	0.128736	0.13376	0.184904	0.131053	0.06245	0.230448	0.459465	0.22756	0.0511534	0.143091	0.16128	0.0333333	0.164842	0.193278	0.25025	0.513588	0.368157	0.36967	0.292272	0.179925	0.177529	0.315185	0.0794119	0.124791	0.0730867
Solyc01g006660	8.4975	Expressed	0.268907	0.107345	0.0782091	0.0253311	0	0	0	0	0.0275	0.0325	0.0309233	0.0388104	0.0225	0.09	0.0590727	0.03	0.738429	0.121338	0.102713	0.0483692	0.053929	0	0.0361421	0.042106	0.0325	0.025	0.02	0.0209662	0.132311	0.106966	0.0904963	0.0575	0.0762306	0	0.085049	0.0442295	0.0325	0.0590727	0.0500625	0.0821584	0.0275	0	0.0320156	0.0555278	0	0.0275	0.0503943
Solyc01g006670	14.805	Expressed	0	0.42003	0.527107	0.893088	0.697476	0.154542	0.916255	0.207941	0.337849	1.11415	1.07611	1.0789	1.33249	1.31441	0.419583	0.455211	0.03	0.465663	0.195464	0.316896	0.303109	0.557096	0.340548	0.417961	0.790401	0.46158	0.507165	1.00327	0.708383	0.283501	0.906389	1.14351	0.0523874	0.0635959	0.353586	0.309526	0.252962	1.04156	0.385711	0.573329	0.137014	0.402831	0.361072	0.391863	0.503924	0.673511	0.461754
Solyc01g006680	54.0525	Expressed	3.141	2.53827	7.01393	2.78706	4.90007	2.82951	2.07718	2.34446	6.17455	9.06688	6.07325	3.29813	2.5667	3.31403	1.86161	1.48467	3.25907	3.33711	0.977228	2.63882	1.68315	1.32113	2.08905	1.57831	4.26104	3.7778	4.31999	1.95914	2.53665	1.7664	2.09181	1.89241	0.811918	0.466774	1.9884	3.82233	1.90911	1.05182	2.86909	2.98795	1.1569	2.30312	0.966376	1.22521	2.04633	1.11944	0.944364
Solyc01g006690	36.1033	Expressed	1.55616	0.446456	0.428901	0.298733	0.143207	0.42719	0.378448	0.433494	0.646084	1.56608	1.2271	0.669719	1.01007	0.759106	0.479079	0.227505	5.47201	0.270832	0.44218	0.455675	0.399614	0.147047	0.249746	0.204914	0.807703	0.485918	0.518162	0.173109	0.307287	0.164943	0.120451	0.0483908	0.0768838	0.463069	0.237943	0.227207	0.294066	0.119826	0.0660177	0.101438	0.0291548	0.0302765	0.0525	0.0246221	0.0555278	0.0520216	0.0313581
Solyc01g006700	53.5833	Expressed	2.28902	3.20333	1.67563	0.267344	1.42694	1.21112	0.571154	1.33504	1.45721	1.26193	0.97202	0.961677	1.33926	1.02038	2.51393	1.04028	13.237	2.70912	1.84616	1.23653	1.16179	0.395443	1.24929	1.32263	2.10145	2.64036	1.54842	0.804626	1.98877	0.80503	1.26245	1.71783	2.43664	2.77506	1.95025	1.66754	1.1538	0.989506	1.29795	1.96427	0.520288	1.62671	0.722512	1.47779	1.03158	0.928963	1.21941
Solyc01g006710	59.4475	Expressed	3.0217	1.19706	0.974221	0.829692	1.70312	1.10117	0.70237	1.08051	2.17415	1.42556	0.800115	2.53463	2.48194	1.39213	2.00889	1.72948	3.21677	1.41685	0.875652	1.85129	1.18761	0.899115	2.78202	0.969368	1.78096	2.2936	2.85242	1.57233	2.47058	1.37806	2.49596	2.77947	2.68196	1.13332	0.448913	0.947043	0.972994	1.06616	1.82212	1.00675	1.98492	1.40623	1.84418	0.720046	2.89743	0.748903	1.24954
Solyc01g006720	16.3475	Expressed	3.88277	0.790626	0.365203	0.41161	0.875304	0.337179	0.657728	0.371985	0.352479	0.255616	0.114928	0.0449768	0.0433013	0.0896289	0.0357071	0.0490535	5.49513	0.754481	0.187038	0.464334	0.215923	0.426693	0.423645	0.414897	0.234854	0.199854	0.18391	0.128614	0.0619812	0.145316	0.0874166	0.0279881	0.101708	0	0.173469	0.22265	0.100416	0.0964689	0.193665	0.116082	0.0225	0.102174	0.0303795	0	0.0325	0.0438511	0.0234521
Solyc01g006730	1.895	Expressed	1.22453	0.174475	0.2396	0.149583	0.154185	0.0928597	0.272473	0.0776075	0.0587899	0.165246	0.122228	0.0889757	0.085098	0.0803508	0.0689656	0.113165	1.58333	0.302445	0.242569	0.119757	0.149025	0.0616441	0.113505	0.254505	0.0517003	0.0548293	0.0552834	0.0381608	0.065	0.05	0.0262599	0.0275	0.03	0.0333333	0.246893	0.127957	0.0872258	0.0262996	0.0275	0	0	0.065	0.0288675	0	0	0.0275	0
Solyc01g006740	13.53	Expressed	1.44383	0.433253	0.336412	0.287355	0.748313	0.299917	0.484207	0.426837	0.234996	0.598044	0.276194	0.208606	0.23429	0.0549242	0.386466	0.244626	3.94029	1.01221	0.398338	0.130544	0.574093	0.760651	0.380556	0.550855	0.370473	0.642033	0.289205	0.338043	0.253837	0.13187	0.195208	0.132311	5.62094	1.3726	0.437748	0.570517	0.506582	0.137682	0.273355	0.337417	0.0792017	0.301175	0.354988	0.120173	0.154407	0.0965553	0.0870225
Solyc01g006750	0		0	0	0	0	0	0	0	0	0	0	0	0	0	0	0	0	0	0	0	0	0	0	0	0	0	0	0	0	0	0	0	0	0	0	0	0	0	0	0	0	0	0	0	0	0	0	0
Solyc01g006760	0.11		0	0	0	0	0	0	0	0	0	0	0	0	0	0	0	0	0	0	0	0	0	0	0	0	0	0	0	0	0	0.03	0	0	0	0	0.035	0.0635085	0	0	0	0	0	0	0	0	0	0	0
Solyc01g006770	24.735	Expressed	0	0	0	0.025	0	0	0	0	0	0	0	0	0	0	0	0	0	0	0.151712	0.12659	0	0	0	0	0	0	0	0	0	0	0	0	0	0	0.0359108	0.661518	0.0750555	0	0	0	0	0	0	0	0	0	0
Solyc01g006780	0.645		0.0633333	0.0354436	0.0531311	0.0931397	0.0803119	0.040078	0.0405175	0.0579332	0.0225	0.0337577	0	0	0.0275	0	0	0.0225	0.0333333	0.0561805	0.0821077	0.0707549	0.045	0	0	0.0377492	0.0666302	0	0	0	0	0	0.0225	0.0325	0	0	0.092826	0.113027	0.0325	0.025	0	0.0402854	0	0	0	0	0	0	0
Solyc01g006790	22.9167	Expressed	0.972391	0.523092	0.438539	0.43001	0.316702	0.154455	0.361144	0.162192	0.240503	0.174613	0.345335	0.0470815	0.157817	0.0731437	0.07565	0.121338	1.72619	0.248412	0.116548	0.237289	0.130032	0.262186	0.419821	0.405165	0.169282	0.168887	0.0927699	0.082361	0.0896289	0.055	0.0698212	0.054064	0.563688	0.0433333	0.204954	0.181498	0.299037	0.11018	0.0812404	0.1194	0	0.0275	0.0278014	0.0425	0.035	0	0.0825126
Solyc01g006800	159.958	Expressed	7.79306	1.19277	2.13011	2.59347	2.70753	5.25756	0.474102	1.31339	2.88187	2.03438	3.43829	3.74194	1.84823	1.52355	3.10076	3.53123	8.45062	3.28594	3.64863	1.97354	3.78631	6.15978	2.00449	2.7746	3.50731	3.02531	2.30607	1.56034	1.97826	2.85267	3.87464	1.48749	3.09966	2.08078	4.4142	2.53279	3.26321	2.43071	1.20517	2.14755	0.642461	2.20156	0.781189	1.77438	1.59855	1.68239	1.91945
Solyc01g006810	67.12	Expressed	1.17975	1.14801	1.75951	1.07667	0.998794	0.637552	0.709583	2.02258	1.53995	0.708573	1.60975	1.82074	0.823008	0.904899	0.150187	0.96186	2.80877	1.3322	1.42047	1.71932	0.923457	1.80824	0.929937	1.42667	2.01267	2.6774	1.36788	0.941161	1.19232	1.06291	0.672995	0.542054	1.08944	0.692852	1.44387	0.815305	0.801669	0.966889	0.587968	0.700825	0.467126	0.674504	0.428785	1.05414	0.501786	0.826059	0.333192
Solyc01g006820	0.47		0	0	0	0	0	0.065	0	0.0618466	0.0275	0.0375278	0.03	0.0025	0.0225	0.0225	0.0625	0.0275	0.03	0.0225	0.0475	0.0483908	0.0432772	0.0361421	0.0366003	0.0325	0.0337577	0.05	0	0.0409268	0.095	0.041508	0.0638357	0.0577891	0.23	0	0	0.0291548	0.0325	0.0495606	0.03966	0	0.0265754	0.0863496	0.025	0.0612883	0.035	0.0225	0.0225
Solyc01g006830	263.902	Expressed	5.88114	4.72298	7.31754	11.6662	7.41277	3.2587	4.42537	4.61056	8.24151	7.0434	8.67521	2.00145	3.84589	4.90988	3.69908	2.93747	11.186	10.1578	12.6993	20.7736	4.71675	8.43374	1.69225	5.02754	6.16253	4.32223	3.55229	2.90235	3.55892	2.32166	4.28716	4.71346	1.40524	8.85908	6.0358	10.7261	4.58816	1.84492	3.17524	3.20547	1.9521	1.10578	2.4138	3.56834	2.32832	1.95342	3.27182
Solyc01g006840	0.84		0	0.21297	0.123626	0.0909556	0.0325	0.0327872	0.0225	0	0	0.025	0.0566238	0	0	0	0	0	0	0.117713	0.137508	0.116503	0.0225	0	0	0	0.025	0	0	0	0	0	0	0	0	0	0.0388104	0	0	0	0	0	0	0	0	0	0	0	0
Solyc01g006850	3.925	Expressed	0.230964	0.10586	0.203034	0.204954	0.438378	0.343717	0.381628	0.115794	0.262087	0.316662	0.289684	0.0829156	0.23876	0.169558	0.101036	0.256527	1.75938	0.385195	0.192153	0.588791	0.149687	0.125325	0.149136	0.488416	0.179745	0.250233	0.176983	0.273663	0.268153	0.255522	0.127565	0.457994	0.111704	0.235112	0.118207	0.337919	0.258231	0.283207	0.244489	0.3426	0.123051	0.116288	0.235956	0.0249583	0.163554	0.149074	0.184977
Solyc01g006860	49.065	Expressed	5.08055	1.8123	2.31109	1.04338	0.229324	0.698826	1.10021	0.355867	1.1326	0.2975	0.996254	0.538191	0.534328	0.614917	0.998176	1.03002	2.30558	0.822389	0.923562	0.680031	1.00005	1.51712	0.570891	1.11118	0.612951	0.736403	0.601429	0.577558	0.374619	1.27982	0.69076	1.45756	0.657782	2.13559	1.19333	0.509779	0.4361	0.429464	0.308936	0.315185	0.317264	0.10496	0.405771	0.155991	0.570153	0.653574	0.679882
Solyc01g006870	104.927	Expressed	3.82897	1.32857	1.76736	1.27323	1.72299	1.83989	1.07067	1.18155	1.141	0.456883	0.46446	0.737974	0.781153	1.13658	0.72749	0.785398	2.6101	1.47985	1.0966	0.540902	0.743264	0.936317	2.21899	0.557321	1.11271	1.09586	0.252071	0.538089	0.813218	0.423111	0.358222	0.818632	8.19003	0.675434	0.145509	0.58818	1.11593	0.323908	1.53817	0.654426	0.29579	0.506277	0.52903	0.473962	0.775224	0.453052	0.3475
Solyc01g006880	72.3275	Expressed	1.18175	0.871464	2.11341	1.10005	2.65606	0.903035	0.986698	2.37682	1.88539	2.09413	1.68418	3.16512	4.85744	1.8766	2.34532	3.60373	6.6316	1.01006	1.2944	3.69244	2.40855	1.4735	3.47692	1.09033	1.51352	1.43818	2.29317	2.00384	5.38788	1.23163	1.40204	3.05559	17.6152	0.481352	1.97926	1.57206	2.02821	0.415439	1.62043	1.46804	2.87681	3.76626	2.62766	1.62504	5.10389	1.78117	1.04939
Solyc01g006890	131.283	Expressed	20.5108	0.754535	1.28562	0.167002	0.592122	0.617662	1.35426	1.37814	0.602273	0.679686	1.11305	0.393975	0.52881	0.518917	0.517896	0.204389	45.3927	2.36875	1.4081	1.67373	0.922031	0.468686	0.550825	0.476434	0.209543	0.62982	0.272286	0.258114	0.449963	0.394905	0.356966	0.236132	6.68928	1.77542	1.10824	0.467839	1.25072	0.208986	0.17839	0.414548	0.185399	0.2322	0.125	0.0782091	0.123221	0.0625833	0.104273
Solyc01g006900	12118.1	Expressed	335.301	23.9055	17.0315	4.07295	25.1858	6.68837	19.0059	11.0539	14.9679	12.4546	15.186	2.4446	12.2012	10.5687	5.06047	8.31003	467.385	31.229	25.58	5.46348	8.33021	9.97425	15.9943	14.1243	17.2005	17.825	18.5959	7.25938	4.74514	4.64414	5.62	8.48959	341.946	299.962	25.6074	21.8442	8.76358	3.89535	17.2473	18.0206	15.2338	22.9087	19.8921	5.01328	4.51298	8.13516	4.19014
Solyc01g006910	0.0225		0	0	0	0	0	0	0	0	0	0	0	0	0	0	0	0	0	0	0	0	0	0	0	0	0	0	0	0	0	0	0	0	0	0	0	0	0	0	0	0	0	0	0	0	0	0	0
Solyc01g006920	2.7025	Expressed	0.126667	0.114045	0.0905884	0.111159	0.277864	0.399445	0.336712	0.0902196	0.41365	0.203034	0.152862	0.0796346	0.0837655	0.219184	0.0544671	0.0822091	0.0333333	0.178816	0.106409	0.225592	0.435763	0.25306	0.38346	0.241695	0.513832	0.264276	0.371851	0.137659	0.147253	0.173415	0.264807	0.289407	0.0779601	0.0793725	0.109649	0.374308	0.270724	0.282415	0.0956012	0.299037	0.126919	0.142624	0.0525991	0.114991	0.315225	0.0866386	0.11926
Solyc01g006930	105.3	Expressed	7.65814	2.06076	1.37757	0.83423	0.94448	2.5398	1.7119	1.35026	1.59216	1.85733	0.331838	2.07054	2.73551	1.66065	0.920338	0.970279	2.25673	0.361755	1.38992	1.64473	1.32034	0.311003	0.797761	1.04924	1.20054	1.20803	1.38822	0.717546	0.497885	0.681901	0.454668	2.54921	0.540411	0.365923	0.465517	1.99786	0.934838	0.444529	0.746062	1.57062	0.208387	0.409214	0.491653	0.467464	0.491164	0.203695	0.150831
Solyc01g006940	176.36	Expressed	14.3427	2.40182	3.04111	1.83473	5.11321	2.87037	0.570122	1.54376	1.23778	1.46522	1.19508	0.995883	1.72658	1.34847	1.27351	1.20079	13.164	2.84506	2.02162	1.09699	0.857555	1.89906	1.3951	2.53729	0.956212	3.1701	1.87582	1.13039	1.76207	1.28733	1.4988	2.17465	0.563511	13.4774	3.89874	2.56947	2.93816	0.575485	1.00323	2.33632	0.609269	1.30091	1.00428	0.898081	0.603219	0.387715	0.619924
Solyc01g006950	27.035	Expressed	1.97479	0.1221	0.0803508	0.0611521	0.204751	1.33897	1.39161	0.255376	4.96231	0.669793	0.568615	0.656257	0.401518	0.289147	0.295466	0.296465	0.153731	0.123584	0.0670044	0.0409013	0.0246644	0.270782	0.108819	0.0179699	0.434135	0.0520216	0.115208	1.02254	0.536553	0.614424	0.326123	0.129832	0.110504	0.260278	0.373996	0.249445	0.151898	0.155958	0.11912	0.08026	0.404977	0.347299	0.175902	0.0754293	0.122907	0.107005	0.121997
Solyc01g006960	56.0775	Expressed	1.79409	0.771917	0.604475	0.47435	0.683831	3.03803	2.44574	0.938638	1.19437	2.8704	2.47387	3.21029	2.55638	1.72127	2.91558	0.749033	1.80269	1.51282	1.24993	3.76203	1.85308	1.20431	3.127	0.228122	0.941037	2.15432	0.481923	0.69636	1.9637	0.729463	1.23787	2.2514	2.74491	1.04186	1.26692	1.60131	2.70761	2.01537	1.45696	1.29199	0.982398	2.03211	0.505509	1.38429	1.89316	0.998836	1.1406
Solyc01g006970	73.285	Expressed	5.14606	1.22495	1.28822	1.14581	2.2426	1.45629	0.460263	1.74102	2.94613	2.07957	1.86088	0.762609	1.56508	1.26791	1.63052	1.82168	8.43544	1.55217	2.51494	4.37916	0.619496	0.979528	3.46347	2.34076	1.81956	3.85858	1.40844	1.51899	2.40417	1.01455	4.04981	2.71604	3.36635	1.09036	2.33386	3.8282	2.367	1.21873	2.58341	1.44486	1.50992	4.37734	3.25124	0.896075	2.30223	1.54178	0.796853
Solyc01g006980	226.97	Expressed	14.3357	3.74769	2.42811	3.52557	0.861718	2.16511	1.60536	0.719595	1.6577	0.971725	1.51226	1.16632	1.59648	0.530935	1.00264	0.535117	1.548	6.99233	4.23858	4.57909	1.03669	0.703638	2.31579	3.20861	1.21284	2.04762	1.7701	0.901938	0.863842	0.953769	0.74673	1.50165	36.7326	12.3769	4.22826	2.72378	1.43369	0.543952	1.35521	0.442989	0.528843	1.00277	1.78813	0.475579	1.53516	1.07865	0.869984
Solyc01g006990	72.5425	Expressed	3.32691	2.17006	0.875075	1.73983	1.03811	0.49128	0.978681	1.28795	1.45053	1.17064	0.872721	0.189621	1.47406	1.5101	1.48701	0.995762	3.54995	1.2192	0.912007	0.848199	0.672972	1.54602	0.910287	1.20867	1.04502	1.32968	1.56086	2.04964	1.66888	0.634644	1.77178	1.40987	6.16613	0.748487	0.768509	1.40049	0.894492	0.652232	1.24815	1.28735	0.945175	0.518514	0.77632	0.567955	1.02702	1.34974	0.663036
Solyc01g007000	60.04	Expressed	0	0.159531	0.253295	0.025	0	0.231283	0.0592136	0.0525	0.254963	0.0808677	0.0825	0.110858	0	0	0.03	0	0	0.162397	0.0953393	0	0.0325	0.586309	0.0823989	0	0.104911	0.0525	0.095	0.121475	0	0	0	0	0	0.1	0.025	0.0225	0	0.0554339	0.0225	0	0.0392375	0	0.03	0.0225	0	0	0
Solyc01g007010	6.69	Expressed	0	0.142909	0.0865424	0.025	0	0.171148	0.0131498	0	0.168937	0.0168325	0.055	0.031225	0	0	0	0	0	0.149833	0.0325	0.0275	0	0.0575905	0.0537548	0	0.0902196	0	0.0325	0	0	0	0	0	0	0.13	0.025	0	0	0.0225	0	0	0.0485412	0	0	0	0.0675	0.0175	0
Solyc01g007020	12.4533	Expressed	0	0.0847054	0.128736	0.0275	0.0275	0.402192	0.0477842	0.06	0.492087	0.11158	0.055	0.367953	0.0665207	0.0377492	0.03	0	0	0.0455293	0.0337577	0	0	0.220279	0.1025	0.03	0.103521	0	0.0325	0.0805709	0	0	0	0	0	0.1	0.025	0	0.03	0.025	0.0225	0	0.0938527	0.0275	0	0.0251661	0.0275	0	0
Solyc01g007030	76.3167	Expressed	0	0.140624	0.208107	0.025	0.095	1.66405	0.402521	0.111393	0.373171	0.154866	0.245	0.779095	0.0737111	0.03	0.0489898	0.0291548	0	0.101848	0.025	0	0	0.214437	0.221072	0.035	0.366455	0.121312	0.0896289	0.285336	0.0275	0.0275	0.03	0.0125	0	0.263333	0.0512144	0.0494975	0.0325	0.60427	0.11098	0	0.352878	0.0348807	0.1225	0.125	0.0388373	0.0234521	0
Solyc01g007040	76.3167	Expressed	0	0.140624	0.208107	0.025	0.095	1.66405	0.402521	0.111393	0.373171	0.154866	0.245	0.779095	0.0737111	0.03	0.0489898	0.0291548	0	0.101848	0.025	0	0	0.214437	0.221072	0.035	0.366455	0.121312	0.0896289	0.285336	0.0275	0.0275	0.03	0.0125	0	0.263333	0.0512144	0.0494975	0.0325	0.60427	0.11098	0	0.352878	0.0348807	0.1225	0.125	0.0388373	0.0234521	0
Solyc01g007050	0.81		0	0	0	0	0	0	0	0	0.0675	0	0	0.025	0.0225	0	0	0	0	0	0	0.05	0	0	0	0	0	0.025	0	0	0.0575	0.0275	0	0	0	0	0.0515388	0.143701	0.0837033	0	0.0510514	0.0722842	0	0.0275	0.025	0	0	0.025	0
Solyc01g007060	19.6	Expressed	3.61078	0.475997	0.328491	0.303946	1.19495	0.196866	0.275151	0.303737	0.469226	0.662387	0.773255	0.901952	0.45261	0.814743	0.286978	0.319922	10.9639	0.467036	0.614044	0.745011	0.285146	0.319283	0.639979	0.196103	0.652099	0.438216	0.468739	0.624947	0.835378	0.679134	0.597467	0.429787	1.06226	1.30216	0.379506	0.730803	0.179136	0.297023	0.540777	0.45881	0.371573	0.787511	0.552319	0.464265	0.316159	1.18998	0.432288
Solyc01g007070	1071.08	Expressed	1.93412	5.1639	12.9766	4.18619	25.176	25.7584	22.3267	29.1152	22.4212	8.23867	7.93296	19.4881	11.545	9.09751	21.245	6.9606	0.537101	4.94039	15.0717	44.9269	18.8669	35.3843	17.714	37.0565	28.2508	11.5861	20.888	30.0078	20.4691	13.3888	28.0414	30.4928	12.2047	0.565007	8.70235	35.1696	20.474	24.3976	17.8009	17.1952	8.55631	20.8471	14.9568	14.976	29.8487	37.6827	42.2372
Solyc01g007080	0.145		0	0.0272336	0	0	0	0	0	0	0	0	0	0	0	0	0	0	0	0.0275	0.0325	0	0	0	0	0	0	0	0	0	0	0	0	0	0	0	0	0	0	0	0	0	0	0	0	0	0	0	0
Solyc01g007090	1.61	Expressed	0.231325	0	0	0	0	0	0	0	0	0	0.0275	0	0	0	0	0	0.203825	0	0	0	0	0	0	0	0.025	0.015	0.035	0	0	0	0	0	0.966247	0.0497773	0	0.0275	0	0	0	0	0	0	0	0	0	0	0
Solyc01g007100	31.2733	Expressed	1.13808	0.769528	0.519118	0.342719	1.12533	1.06233	0.424507	0.744159	1.53168	0.711447	0.912628	0.132508	1.48832	0.395696	0.587159	0.614146	4.86729	1.29171	1.8374	0.64026	0.928323	0.952234	0.625705	0.780945	1.37735	0.3869	0.655477	0.764215	0.836076	0.805775	0.400882	1.07081	1.10218	1.9816	0.995769	0.506927	0.71249	0.386501	0.959491	0.848895	1.42374	0.81854	0.260336	1.0402	1.08184	1.07078	0.432608
Solyc01g007110	282.047	Expressed	12.9138	1.84661	0.759281	1.83587	1.64335	6.1555	8.77242	3.01669	6.21189	3.96318	3.85695	3.37234	16.7209	3.30459	4.72717	7.12397	5.65816	1.29386	1.19234	0.80486	1.06955	3.83377	7.10215	3.32705	6.93439	1.79855	2.94539	5.31034	2.15088	2.01477	5.7754	2.80262	15.2064	8.13538	0.928676	2.01462	3.64546	3.52928	4.33977	1.63361	7.09085	2.52343	4.7932	4.3055	4.23317	3.34013	3.87497
Solyc01g007120	32.0525	Expressed	1.23861	1.00628	1.1474	1.48586	1.36814	1.71435	0.621294	1.42608	0.102581	1.09739	1.81618	1.1041	1.25282	1.26255	1.64958	0.795414	5.66493	1.46304	1.16494	2.15295	1.25498	1.89665	0.620913	2.14725	1.94555	2.373	1.43767	1.11293	1.06476	1.57387	0.916101	1.47611	0.59524	0.308671	1.02668	1.01201	1.21889	0.603283	0.201267	0.881139	0.672215	1.53422	0.986377	0.230412	0.706004	0.718627	0.792617
Solyc01g007130	42.8175	Expressed	2.91232	0.675413	0.770047	1.57016	0.972878	1.58999	0.837337	1.34666	2.34015	3.02208	2.14354	0.220884	0.428454	0.453787	0.242637	0.452076	2.02477	0.297574	0.572043	2.78275	1.00852	1.58628	2.70345	1.09207	0.457464	1.90143	1.08915	0.177647	0.557799	0.359537	0.289612	0.130224	0.436056	0.219418	0.190279	0.254313	1.18807	0.21964	0.450093	0.629795	0.203572	0.445896	0.362868	0.243328	0.432088	0.304344	0.149576
Solyc01g007140	19.1933	Expressed	2.96409	0.863467	0.517081	0.55108	0.418278	0.515402	0.718858	0.451264	0.444869	0.552819	0.392139	0.437652	0.195549	0.0228674	0.268608	0.131814	4.10252	0.98647	0.542502	0.467484	0.485719	0.493784	0.440199	0.537267	1.15716	0.324795	0.446365	0.264575	0.194957	0.227317	0.699897	0.358632	1.90573	1.42247	0.634841	0.442813	0.617832	0.54512	0.391629	0.4264	0.080247	0.537068	0.248093	0.30923	0.574955	0.289209	0.546115
Solyc01g007150	217.99	Expressed	3.9123	6.47001	6.47464	1.61549	8.11314	9.94975	3.15316	4.99731	2.61136	3.58188	2.6862	3.46221	5.28935	2.56666	2.45517	1.72478	4.64138	5.97737	10.0488	6.86696	3.64925	9.35938	8.69492	11.9559	7.17998	5.80027	4.18117	3.78667	4.21098	2.85982	6.24553	6.5859	1.05947	4.95646	6.37532	4.64553	6.16595	3.21056	3.3151	5.10462	1.82586	4.61283	2.74206	2.91013	1.13496	1.19886	1.67497
Solyc01g007160	10.405	Expressed	0.139801	0.620893	0.240013	0.23368	0.126054	0.270936	0.174851	0.265028	0.223196	0.251081	0.102174	0.0804544	0.0308221	0.101602	0.0551513	0.135923	0.949076	0.721369	0.289407	0.354974	0.178746	0.209483	0.233274	0.099037	0.127107	0.0413068	0.140772	0.150409	0.0868308	0.115497	0.0654949	0.0535996	0.291605	0.490215	0.313618	0.183819	0.382783	0.133627	0.152664	0.0600694	0.0621825	0.0863134	0.0357071	0.0701189	0.0873093	0.0653676	0.0572276
Solyc01g007170	159.617	Expressed	0.0533333	0.261438	0.200182	0.233345	0.133229	0.275208	0.116512	0.18143	0.234112	0.299249	0.294066	0.0809835	0.105069	0.0646787	0.167351	0.0708872	1.66854	0.63891	0.473134	0.211202	0.257047	0.3712	0.308234	0.210174	0.318826	0.0688446	0.109163	0.0466146	0.0474342	0.025	0.045	0.0390246	0.405093	13.4729	0.7089	0.517019	0.224277	0.110633	0.193148	0.142302	0.0853424	0.0536967	0.0788855	0.0722697	0.0322749	0.0225	0.02
Solyc01g007180	11.1625	Expressed	1.03852	0.249846	0.43674	0.91819	0.285467	0.399174	0.50162	0.333501	0.410698	0.398505	0.431072	0.233858	0.244165	0.548154	0.418111	0.327592	0.700769	0.603642	0.348066	0.33856	0.19395	0.43448	0.394068	0.429523	0.380819	0.192413	0.105396	0.330691	0.480995	0.479607	0.250645	0.38474	0.130512	0.356199	0.468206	0.431014	0.269486	0.331336	0.259852	0.440927	0.344538	0.235633	0.332525	0.375022	0.248307	0.351435	0.395653
Solyc01g007190	28.1633	Expressed	2.59356	0.139007	0.136443	0.251806	0.220884	0.439375	0.706592	0.150852	0.409621	0.439109	0.600172	0.385227	0.544472	0.49202	0.225032	0.374789	1.36828	0.106566	0.228633	0.785402	0.274996	0.213673	0.385581	0.187127	0.169755	0.231175	0.19952	0.458057	0.449951	0.552585	0.213009	0.52792	9.8055	0.0145297	0.252356	0.0689807	0.319283	0.432789	0.289943	0.244996	0.396884	0.727775	0.625853	0.309798	0.120451	0.23496	0.155724
Solyc01g007200	158.363	Expressed	4.17745	0.682878	0.159922	0.0495606	0.131743	0.0430842	0.0733002	0.0666302	0.071807	0.0600694	0.0603462	0.075111	0.0554527	0.0242813	0.0615596	0.0771362	4.68043	0.67257	0.308744	0.251214	0.230086	0.162763	0.20922	0.103552	0.236163	0.160753	0.165151	0.127435	0.108781	0.107577	0.0137689	0.0188746	25.1333	0.574195	0.653981	1.40587	0.656726	0.946229	0.121475	0.567494	0.483535	0.812245	1.14443	0.23038	0.409654	0.428272	0.416473
Solyc01g007210	7.3275	Expressed	0	0	0	0	0	0	0.0347311	0	0.0225	0	0	0	0	0.03	0	0	0	0.0570088	0.025	0	0.0291548	0.0469707	0.0314576	0.035	0	0.0244949	0	0.0225	0.02	0.0275	0	0.025	0	0	0.0643396	0.0749444	0.0339116	0.178016	0.128477	0.281395	0.109621	0.218189	0.0940744	0.0542371	0.138804	0.0967277	0.0554339
Solyc01g007220	1056.88	Expressed	5.20451	0.600671	1.48174	17.3359	31.0299	66.0027	18.9711	22.3478	32.4728	28.1567	24.406	24.3323	11.1729	6.94522	11.2967	10.527	26.3097	0.326021	2.68895	17.3408	61.5494	14.9806	40.3741	45.3358	65.8693	22.6931	14.3343	5.15095	4.50644	9.293	10.6154	10.3448	19.2012	0.302343	3.71281	27.7226	35.0847	41.4587	15.3229	121.131	50.0909	31.656	26.8392	11.9923	5.20274	5.85281	9.20136
Solyc01g007230	28.0333	Expressed	2.35716	0.743382	1.26722	0.65712	0.287344	0.364852	1.27089	0.128541	0.159844	0.363074	0.910865	0.537236	1.68663	0.266939	0.638077	0.172119	3.08824	1.08578	0.719149	0.499523	0.283711	1.68981	1.36641	0.719356	1.71987	1.13858	0.665964	0.860857	1.23684	0.38023	0.60985	0.671992	0.421518	1.36429	0.670193	0.28688	0.67193	0.89471	1.09367	0.55099	1.08713	1.01696	0.43689	0.855497	0.723134	0.717395	0.825019
Solyc01g007240	0.64		0.108167	0.0246221	0	0	0	0	0	0	0	0	0	0	0	0	0	0.0225	0.161486	0	0	0.0275	0	0	0	0	0	0	0	0	0	0	0	0	0.43	0.052915	0	0	0	0	0	0	0	0	0	0	0	0	0
Solyc01g007250	25.25	Expressed	0.963714	0.578028	0.891469	0.561788	1.25698	1.0779	1.09764	0.794418	1.75389	0.424762	0.931704	1.14434	1.11888	0.719089	1.23864	0.339666	1.39624	0.674838	0.645659	1.19766	0.313086	0.80534	0.41582	1.73012	0.951196	0.982811	0.83398	0.71553	0.955218	1.12329	1.01889	1.48581	0.68737	0.600528	0.734363	0.861514	1.16259	0.397689	0.3186	1.0817	0.259852	0.300569	0.516357	0.318656	1.75988	0.402438	0.233256
Solyc01g007260	8.9	Expressed	1.07226	0.430078	0.116789	0.11098	0.262631	0.181315	0.294406	0.305706	0.124399	0.0988581	0.147047	0.117969	0.172119	0.10054	0.217078	0.0822977	0.123423	0.169583	0.0837033	0.147564	0.145516	0.162603	0.156977	0.18821	0.133253	0.0970395	0.0639661	0.100613	0.113063	0.0908639	0.0451848	0.0428904	0.0120185	0.0433333	0.101355	0.123718	0.152643	0.0640963	0.139306	0.0566422	0.0253311	0	0	0	0	0.0175	0.0375
Solyc01g007270	0.325		0.03	0.0719375	0.03937	0.0303795	0	0	0	0	0	0	0	0	0	0	0	0	0	0.0366288	0	0.0275	0	0	0	0	0	0	0	0	0	0	0	0	0.03	0	0.025	0	0	0	0.0275	0.0325	0	0	0	0	0.0275	0	0
Solyc01g007280	58.1175	Expressed	0.04	0.883632	0.0502286	0.312916	0.164747	0.224444	0.0449768	0.208222	0.163471	0.156977	0.199097	0.0753188	0.0887295	0.0515388	0.0812788	0.0911043	0.06	1.78	0.259438	0.0942514	0.142039	0.121269	0.133573	0.102754	0.264902	0.0719375	0.0840015	0.101489	0.0959492	0.0406971	0.146173	0.343536	0.0233333	0.25	0.456698	0.192327	0.335174	0.0629153	0.383178	0.0920484	0.143258	0.118392	0.112138	0.144914	0.071239	0.103471	0.0798305
Solyc01g007290	23.725	Expressed	0	0.612446	0.0963933	0.206841	0.0919239	0.0259406	0.172838	0.0843603	0.0520416	0.150187	0.11034	0.117287	0.0934969	0.1175	0.120303	0.151795	0.10729	0.590515	0.151052	0.140616	0.117296	0.0348807	0.173608	0.221378	0.102011	0.123584	0.178396	0.0593542	0.081035	0.0625167	0.0687235	0.150575	0.116667	0.0333333	0.345383	0.168294	0.34305	0.163777	0.261769	0.0944281	0.133253	0.0872138	0.123761	0.169386	0.128193	0.132319	0.0459166
Solyc01g007300	53.6	Expressed	0	1.61609	0.102256	0.305024	0.271335	0.189929	0.253784	0.316886	0.173799	0.209881	0.169165	0.223956	0.183774	0.198468	0.199374	0.303655	0.0788106	2.07457	0.416801	0.40584	0.213517	0.241743	0.335494	0.25752	0.125192	0.219179	0.389709	0.136771	0.213595	0.0794119	0.12559	0.212304	0.106927	0.101379	0.185354	0.426798	0.75587	0.235973	0.585441	0.2134	0.176983	0.0731864	0.0492443	0.259467	0.215808	0.184724	0.0983616
Solyc01g007310	49.0125	Expressed	0.0633333	1.46642	0.121997	0.209026	0.282116	0.17647	0.180947	0.360775	0.249846	0.169478	0.210099	0.233845	0.260928	0.197837	0.105396	0.281199	0.0333333	2.16342	0.448646	0.292272	0.11811	0.24503	0.119887	0.0858778	0.208447	0.153697	0.458158	0.0375278	0.0822977	0.0884473	0.155584	0.152616	0.0986577	0.177858	0.343545	0.475033	0.542901	0.242775	0.846664	0.0822977	0.132437	0.135485	0.0715309	0.131426	0.23855	0.16938	0.124791
Solyc01g007320	1580.39	Expressed	40.9627	20.1871	26.6948	2.9369	30.4827	18.4936	20.4191	24.3202	25.9222	25.3221	26.594	3.82455	31.4749	18.4421	9.95651	15.7929	16.7455	20.3075	122.835	27.2588	55.0672	27.7766	24.1909	12.0559	15.6797	13.8801	6.08642	10.8961	14.5516	5.43816	2.80167	3.99108	72.0622	116.836	234.985	23.8469	10.3405	16.8585	44.5895	34.3827	6.11051	12.5788	10.1376	9.91142	6.53362	5.7963	11.0225
Solyc01g007330	455.788	Expressed	1.85334	26.0553	0.66036	14.2298	4.65726	0.548686	0.773492	0.395904	0.512175	0.826146	0.272622	0.728246	1.03623	0.590316	0.236132	2.97009	0.200749	32.2472	1.35389	0.423583	1.61407	0.914069	1.25378	0.713669	0.372066	0.154785	0.514895	0.281632	0.437481	0.410089	0.75389	2.53856	9.37199	30.2495	8.94149	1.0064	2.01721	0.85234	0.346924	0.599402	0.725632	0.547333	0.911897	0.439593	0.802506	0.671993	0.796712
Solyc01g007340	75.06	Expressed	0.927296	1.11913	0.226729	0.204247	0.0609645	0.0572094	0.0820569	0.143316	0.0663796	0.236538	0.206816	0.15467	0.135892	0.120139	0.207339	0.589046	0.958981	1.58498	0.0600694	0.108205	0.196824	0.281318	0.27771	0.0108012	0.14459	0.126557	0.102581	0.109345	0.0829156	0.2425	0.193536	0.87477	2.48006	0.054569	0.270597	0.15467	0.186123	0.2381	0.984889	0.254264	0.280877	0.108436	0.368202	0.179878	0.16505	0.149917	0.142302
Solyc01g007350	36.4575	Expressed	0.902447	1.08848	0.353492	0.461273	0.0909556	0.0980646	0.136931	0.12626	0.0878446	0.257888	0.0667551	0.0933185	0.183961	0.06408	0.232128	0.344202	0.816279	1.06132	0.119338	0.234036	0.167052	0.103037	0.115857	0.0518612	0.119757	0.0765261	0.130727	0.0667083	0.0826009	0.151073	0.0369685	0.295561	0.41138	0.0208167	0.389195	0.146024	0.133354	0.113652	0.496813	0.171537	0.0954812	0.0808806	0.201179	0.0966523	0.142383	0.0675771	0.142624
Solyc01g007360	29.9625	Expressed	0.0360555	1.06103	0.262722	0.589951	0.0873093	0.0634265	0.0880696	0.334739	0.0928709	0.184052	0.15346	0.0458939	0.23848	0.0554339	0.191572	0.287355	0.0683943	0.75312	0.149185	0.329621	0.21418	0.0499166	0.162814	0.12439	0.0711805	0.102581	0.158693	0.0546771	0.0631631	0.093586	0.0625	0.27762	0.0584047	0	0.25731	0.11143	0.170929	0.0982662	0.40372	0.113505	0.127957	0.0822977	0.151623	0.0531311	0.185129	0.0619644	0.076308
Solyc01g007370	46.0575	Expressed	0.197428	1.64111	0.298454	0.703354	0.260592	0.125723	0.208821	0.313236	0.218556	0.135308	0.174356	0.086446	0.169871	0.0137689	0.165555	0.35088	0.031798	1.81139	0.22102	0.307473	0.184272	0.183093	0.202217	0.189709	0.10681	0.088176	0.186788	0.0533073	0.0817899	0.0575905	0.066505	0.3869	1.53448	0.885457	0.145659	0.102835	0.248831	0.159811	0.539738	0.197779	0.190761	0.0946375	0.299872	0.1325	0.0582201	0.166158	0.0810864
Solyc01g007380	41.965	Expressed	1.60138	1.68318	0.263581	0.750811	0.148015	0.0764172	0.226987	0.172982	0.162301	0.121209	0.216814	0.0880341	0.15785	0.035	0.0469929	0.197795	0.407035	1.72875	0.14543	0.159426	0.0988581	0.238747	0.200728	0.283472	0.127957	0.122704	0.115072	0.035678	0.0891978	0.0309233	0.0672526	0.544432	11.1944	2.89041	0.191093	0.166352	0.0735272	0.0663796	0.361236	0.131743	0.251707	0.167997	0.385949	0.133573	0.106615	0.149304	0.0980646
Solyc01g007390	6.0475	Expressed	0	0.0943729	0.0575	0.0428904	0.0348807	0.064727	0.0661438	0.0558271	0.0803508	0.0325	0.0332603	0.0475	0.0225	0.03	0.0275	0.0564764	0.0333333	0.0708725	0.0275	0.0483692	0.0325	0	0.0451617	0.0370529	0.0319831	0.0511534	0.0766485	0.0546771	0.02	0.025	0.0291548	0.175618	0.2	0.13	0.060329	0.0818535	0.0530723	0.145516	0.0918785	0.070637	0.079425	0.14812	0.0556028	0.0347311	0.0388373	0.0458939	0.0466146
Solyc01g007400	10.505	Expressed	0.0360555	0.410579	0.364635	0.392035	0.272855	0.316412	0.275363	0.365431	0.0594418	0.1974	0.367273	0.11669	0.172548	0.112583	0.159426	0.344102	0.136423	0.395527	0.147111	0.185893	0.149611	0.17825	0.228674	0.263217	0.126689	0.0832041	0.102987	0.131688	0.267286	0.253258	0.155369	0.494082	0.206989	0.0351188	0.330817	0.222275	0.427873	0.399215	0.331273	0.309745	0.141502	0.181797	0.174326	0.269707	0.301372	0.0829031	0.345796
Solyc01g007410	28.6625	Expressed	0.03	1.84082	0.55363	1.02383	0.656817	0.65816	0.647238	0.156917	0.398466	0.928381	0.946159	0.487647	0.680845	0.372052	0.495824	0.727981	0.0520683	2.18335	0.613664	0.433501	0.210159	0.411754	0.280045	0.47426	0.0447912	0.324997	0.385127	0.353138	0.190323	0.460941	0.490671	0.594284	0.106927	0.273008	1.18958	0.537075	0.738856	0.704988	0.701766	0.524174	0.120485	0.538197	0.689553	0.477328	0.659752	0.160026	0.793992
Solyc01g007420	29.385	Expressed	0.04	0.410414	0.165479	0.55108	0.561432	0.232858	0.185203	0.419335	0.0812917	0.255029	0.252401	0.0982662	0.101366	0.233399	0.0580768	0.0902312	0.03	0.24437	0.273233	0.34198	0.0712244	0.281021	0.317211	0.0703562	0.0319831	0.0896637	0.0521816	0.115929	0.114127	0.0657013	0.104592	0.447344	0.0608276	0	0.218341	0.26385	0.263862	0.220964	0.489711	0.138526	0.110529	0.149185	0.148289	0.102744	0.0381608	0.266157	0.119757
Solyc01g007430	46.5275	Expressed	0	0.581112	0.0723994	0.757765	0.517597	0.221975	0.539867	0.700302	0.23135	0.459311	0.278373	0.0851836	0.324474	0.235421	0.197331	0.21272	0.15	0.502071	0.236797	0.455529	0.215523	0.306849	0.332791	0.188989	0.0804544	0.244417	0.156791	0.121826	0.272836	0.115208	0.248776	0.231782	0.0409607	0	0.365787	0.53744	0.402251	0.28144	0.462763	0.229905	0.121886	0.420922	0.302559	0.19623	0.0994464	0.323535	0.255159
Solyc01g007440	53.065	Expressed	0.156667	1.23794	0.214995	0.288455	0.140438	0.204369	0.587892	0.185803	0.0829156	0.283237	0.160384	0.40372	0.259792	0.179554	0.0698063	0.417819	0.165865	1.07623	0.162859	0.4897	0.237745	0.185899	0.169534	0.225106	0.13626	0.270447	0.369064	0.131553	0.221998	0.137682	0.122848	0.307259	0.0643774	0.168259	0.165145	0.426868	0.862104	0.228924	0.657437	0.33656	0.137863	0.284382	0.388874	0.0725718	0.132563	0.164215	0.353751
Solyc01g007450	35.765	Expressed	0.156667	0.949495	0.118814	0.181177	0.138173	0.190148	0.236656	0.208342	0.172458	0.0990265	0.0771767	0.270262	0.115136	0.0911386	0.0316228	0.0526585	0.0818535	0.738911	0.223546	0.211714	0.119234	0.0331662	0.163267	0.176322	0.0653676	0.076635	0.20093	0.0545245	0.195762	0.163114	0.0330404	0.272316	0.0643774	0.13	0.0653676	0.195128	0.542571	0.137439	0.410312	0.280487	0.0913213	0.0910586	0.3425	0.0327554	0.0681298	0.0961228	0.142967
Solyc01g007460	21.445	Expressed	0.0633333	0.660625	0.17041	0.099037	0.0790965	0.159341	0.17528	0.0730867	0.101766	0.139784	0.130472	0.167829	0.0780491	0.0925563	0.0609645	0.0564764	0.07	0.390747	0.150056	0.146771	0.123111	0.0545245	0.133104	0.0971253	0.0361421	0.0275379	0.125192	0.0804156	0.137265	0.0625167	0.0322749	0.111608	0.175784	0.104403	0.291244	0.11098	0.405039	0.1248	0.308369	0.193671	0.0645981	0.105386	0.234254	0.0673764	0.0534439	0.0348807	0.0892912
Solyc01g007470	52	Expressed	0	1.07565	0.239409	0.448785	0.344746	0.174517	0.207379	0.0765261	0.128744	0.121955	0.0694472	0.205157	0.0849877	0.111831	0.0769199	0.216506	0	0.983602	0.186341	0.376372	0.236762	0.169773	0.0880814	0.0876903	0.0803508	0.0931285	0.186341	0.0625	0.0963933	0.101201	0.0952628	0.261836	0.0272845	0.263502	0.477151	0.350104	0.197083	0.203403	1.73735	0.730542	0.134063	0.178296	0.112583	0.0667083	0.318264	0.114964	0.0954812
Solyc01g007480	3.9825	Expressed	0.120139	0.0287228	0.106566	0.0822091	0.0348807	0.0612883	0.0398696	0	0.0317543	0	0.0339116	0.0225	0.045	0	0.0412311	0.0314576	0.136423	0.0389444	0.0850857	0.111533	0.0290115	0	0.035	0.0743163	0	0.05	0	0	0.0406202	0	0.0593015	0.0965229	0.0517472	0.447263	0.106487	0.0273861	0.0627163	0.0225	0.0469707	0.0311916	0.03	0.0332603	0.148549	0	0.0648717	0.0526585	0.0217466
Solyc01g007490	336.433	Expressed	4.56481	3.50524	2.98256	1.05002	0.814095	1.20348	0.687859	1.57272	0.496746	1.05082	0.655698	0.696017	1.1312	0.692584	0.313166	1.29998	2.05583	4.60818	5.35571	1.58649	2.14571	0.648595	1.5579	0.808734	0.9585	1.21403	0.459372	0.649492	0.584371	0.581182	0.400279	0.993767	12.4468	19.2504	8.76649	1.39781	1.3577	1.17426	8.74858	2.15132	1.46478	0.291987	1.37316	0.36179	0.568463	0.748164	0.582157
Solyc01g007500	243.293	Expressed	0.359212	6.54543	0.899735	5.55353	0.780559	0.422244	0.325919	0.403526	0.229964	0.23855	0.257779	0.124197	0.498872	0.188989	0.245879	0.572611	0.0384419	8.73425	1.1844	0.352264	0.642941	0.28418	0.321154	0.25593	0.323403	0.181997	0.263672	0.0796346	0.107781	0.0381608	0.211286	0.435794	1.60039	3.30288	1.41768	0.62112	0.265973	0.475833	0.630502	0.208706	0.181768	0.305355	0.451873	0.190717	0.222762	0.145165	0.253159
Solyc01g007510	13.7025	Expressed	0	0.0913327	0.0781425	0.126582	0.066458	0.0327554	0.0661438	0.0722842	0.0819044	0.084951	0.1075	0.0826136	0.07587	0.0988264	0.109848	0.080247	0.031798	0.184278	0.0699405	0.132035	0.0694472	0.0601387	0.0265754	0.0298259	0.108513	0.0634265	0.0766485	0.0628987	0.12114	0.0413068	0.108513	0.20122	0.0272845	0.151767	0.0946925	0.0798436	0.154455	0.176606	0.2725	0.0662539	0.0984039	0.160954	0.140505	0.0601387	0.047697	0.0638357	0.0591608
Solyc01g007520	30.8575	Expressed	0.03	1.98649	0.160883	1.11452	0.164943	0.120234	0.129317	0.0542371	0.109545	0.139104	0.170361	0.169017	0.111234	0.102987	0.132225	0.0828025	0.0788106	1.67496	0.238432	0.124256	0.235385	0.164842	0.108051	0.160954	0.0893845	0.0389444	0.109877	0.0278388	0.0946375	0.0746659	0.12951	0.171288	0.03	0.00881917	0.531578	0.239965	0.188387	0.130855	0.248038	0.123996	0.0262599	0.114782	0.0679461	0.0918672	0.312876	0.0810864	0.0698063
Solyc01g007530	53.0275	Expressed	0.0933333	1.94504	0.205604	1.30553	0.245912	0.0443471	0.323947	0.0558831	0.110331	0.132814	0.288715	0.206175	0.184317	0.126252	0.134931	0.0678233	0.13	2.20814	0.222523	0.128541	0.117402	0.201551	0.0429146	0.14459	0.122772	0.135854	0.128225	0.071923	0.0928597	0.0807646	0.134319	0.424058	0.0983757	0.276827	0.47818	0.331537	0.214762	0.210292	0.257002	0.116145	0.134969	0.0739369	0.131806	0.155938	0.362962	0.0359108	0.0606905
Solyc01g007540	16.385	Expressed	0.0731057	0.510114	0.142215	0.415579	0.0411045	0.106888	0.0924211	0.0629153	0.103078	0.0848528	0.177781	0.094384	0.07576	0.196702	0.0823989	0.0651121	0.06	0.607802	0.200598	0.106341	0.0943729	0.185624	0.0474342	0.0878446	0.104113	0.0442295	0.0502286	0.11199	0.112583	0.0681298	0.0520216	0.215653	0.0655744	0.110151	0.194465	0.161684	0.131996	0.110868	0.273542	0.10247	0.0327872	0.0402078	0.0778219	0.0409268	0.0944281	0.03937	0.0290115
Solyc01g007550	19.3325	Expressed	0	0.201469	0.117686	0.148682	0.419571	0.204002	0.175926	0.191093	0.0801561	0.297125	0.128087	0.0637704	0.0934969	0.0752773	0.132059	0.0769605	0.0520683	0.145745	0.162839	0.348748	0.0830035	0.184052	0.0426224	0.12939	0.0670199	0.0668954	0.0442295	0.0712975	0.0547723	0.119652	0.0638357	0.158186	0.0566667	0.0726483	0.25984	0.210609	0.158502	0.201184	0.265456	0.251707	0.153535	0.0575905	0.0794119	0.114091	0.132759	0.218456	0.103803
Solyc01g007560	73.1825	Expressed	0.19785	0.687355	0.407582	0.428765	0.492367	0.357841	0.311405	0.41827	0.0217945	0.287587	0.155724	0.0895824	0.0793069	0.107732	0.133697	0.219597	0.0617342	1.03164	0.476679	0.47361	0.173421	0.275541	0.202335	0.264461	0.105712	0.102307	0.063901	0.107345	0.0680686	0.205386	0.0937528	0.329732	1.48798	0.880587	0.405237	0.218799	0.259049	0.509534	1.53345	0.347791	0.382416	0.165555	0.206196	0.0390246	0.104592	0.335137	0.132122
Solyc01g007570	123.968	Expressed	0.19785	1.25708	0.506565	0.985659	0.526187	0.358155	0.418158	0.520967	0.113679	0.363143	0.14086	0.104193	0.0653835	0.21727	0.143491	0.388702	0.064291	2.15147	0.527753	0.463447	0.234605	0.281436	0.327172	0.334599	0.136221	0.142324	0.148997	0.114045	0.106027	0.273599	0.0476751	0.547272	1.63868	0.692082	0.905616	0.353586	0.416823	0.650385	2.45121	0.83776	0.485496	0.253952	0.350889	0.0619812	0.128541	0.429389	0.115866
Solyc01g007580	153.22	Expressed	0.190992	1.37152	0.498069	1.6709	0.240659	0.221002	0.33532	0.435603	0.0707107	0.125723	0.215116	0.066458	0.0560506	0.147669	0.132571	0.441946	0.0929157	3.13003	0.420674	0.417872	0.221261	0.193019	0.36894	0.23757	0.113165	0.214335	0.128938	0.0295452	0.117402	0.249483	0.135054	0.800963	1.72721	0.548088	1.01556	0.490244	0.32882	0.525157	3.44711	1.21117	0.629608	0.305706	0.257209	0.175309	0.104123	0.246623	0.0815858
Solyc01g007590	145.36	Expressed	0	1.37807	0.329251	1.38892	0.234432	0.231409	0.335569	0.154563	0.198174	0.252632	0.278609	0.0558831	0.0954812	0.178763	0.181539	0.391631	0.0888819	3.29326	0.151575	0.430058	0.17853	0.118638	0.361605	0.191572	0.263391	0.180393	0.218499	0.0838028	0.159452	0.175333	0.147253	0.789726	0.268473	0.401539	0.670236	0.519044	0.279922	0.289464	3.02317	1.15626	0.442474	0.38202	0.270216	0.0748331	0.127565	0.27777	0.0499166
Solyc01g007600	172.715	Expressed	0	2.38194	0.330867	1.74248	0.361141	0.361363	0.309381	0.0962094	0.0573004	0.219369	0.181584	0.217006	0.0815858	0.208107	0.214981	0.299917	0.03	5.14182	0.499856	0.52151	0.253652	0.333151	0.292475	0.00866025	0.449618	0.168375	0.183229	0.211478	0.301897	0.293297	0.208861	1.10977	0.0351188	0.483368	0.379364	0.330404	0.428923	0.323342	3.79083	1.11278	0.810046	0.600519	0.243413	0.134001	0.132185	0.176186	0.113752
Solyc01g007610	296.517	Expressed	1.17959	5.42759	1.64565	1.0505	1.13746	0.971841	1.72938	0.67182	0.40651	1.20746	0.475366	0.659019	1.21443	0.190542	0.257747	0.945739	0.825456	8.93584	2.48792	2.98473	0.175357	0.876997	0.899796	1.31702	1.91328	0.454723	0.181401	0.253985	1.29872	0.667388	0.712215	2.50775	4.37347	3.48615	4.32384	0.821061	0.338551	0.723606	6.6967	2.21598	1.54021	1.11102	1.01465	0.59122	0.381431	0.507024	0.305082
Solyc01g007620	119.645	Expressed	0.153333	2.51758	0.581585	0.560868	0.369899	0.274181	0.0614241	0.175333	0.166602	0.220959	0.140616	0.086446	0.307256	0.0623164	0.194615	0.440915	0.0333333	3.98978	0.79723	0.761888	0.0858778	0.254112	0.229147	0.278538	0.326305	0.0470815	0.107199	0.110076	0.382426	0.225333	0.324252	0.793279	0.00666667	0.280852	1.07294	0.27198	0.264039	0.215812	2.48092	0.763941	0.524675	0.551353	0.394575	0.212029	0.187794	0.333279	0.135976
Solyc01g007630	365.887	Expressed	1.43323	5.24798	1.28906	0.750182	2.36183	3.08161	2.47849	2.2488	1.79961	1.75847	1.29966	0.674022	2.54737	2.35395	0.588791	3.17503	1.9618	11.497	11.4175	4.66079	7.08162	1.78674	2.5757	2.19512	2.53725	1.98584	1.50858	1.31142	3.80203	0.919306	0.483158	5.91026	10.5825	8.40994	11.1758	1.26805	1.12576	1.65078	10.208	3.00373	2.19987	2.03779	1.50756	2.02916	1.45539	1.34244	3.41067
Solyc01g007640	485.695	Expressed	0.18	2.13358	0.0626332	0.673999	0.254869	0.257472	0.229578	0.0317543	0.344988	0.239861	0.251363	0.0564764	0.154569	0.118066	0.149805	0.214593	0.593755	3.52508	0.200349	0.224291	0.13671	0.167257	0.173301	0.220775	0.167978	0.171239	0.243152	0.148885	0.107655	0.0844961	0.117969	0.174708	0.487488	0.20232	0.481067	0.150132	0.318443	0.483822	0.450488	0.207846	0.180993	0.382154	0.648079	0.40784	0.282386	0.260768	0.116225
Solyc01g007650	67.775	Expressed	0.03	0.285464	0.0193111	0.0997914	0.110104	0.151079	0.0362859	0.0857321	0.0963501	0.0075	0.0940744	0.025	0.0852814	0.0625	0.045	0.0993626	0.115662	0.737524	0.0569356	0.0721543	0.152281	0.03	0.0534439	0.192419	0.0330404	0.0244949	0.0451617	0.045	0.0536967	0.0542179	0.1075	0.147895	0.23	0.0392994	0.183002	0.076635	0.149798	0.124967	0.16398	0.110934	0.041508	0.119609	0.185944	0.0490748	0.182454	0.0248328	0.0596343
Solyc01g007660	39.0675	Expressed	0.2373	0.649012	0.271949	0.400154	0.463968	0.172597	0.314245	0.430317	0.679252	0.159922	0.31221	0.330539	0.723424	0.138225	0.254145	0.471045	0.258349	0.716977	0.304959	0.281854	0.46376	0.316412	0.484224	1.33529	0.236238	0.280208	0.143091	0.102956	0.342126	0.126582	0.0652399	0.321646	0.554417	1.93095	0.38938	0.594508	0.727037	0.340649	0.118533	0.585283	0.111084	0.214607	0.540201	0.271247	0.385951	0.159707	0.144878
Solyc01g007670	24.1575	Expressed	0.112151	0.826301	1.01302	0.429864	0.506974	0.61337	0.443497	0.606855	0.499575	0.23535	0.325	0.233559	0.285347	0.289003	0.205061	0.605103	0.161486	0.621053	1.00729	0.680018	0.151568	0.357919	0.458573	0.603338	0.266974	0.214724	0.199682	0.0900347	0.430994	0.1279	0.221548	0.779241	0.200749	0.243059	1.2067	0.219597	0.504404	0.171677	0.327478	0.46133	0.158745	0.137682	0.213385	0.265016	0.210055	0.424271	0.312557
Solyc01g007680	30.8033	Expressed	0.137154	1.04313	0.182277	0.410069	0.145165	0.163961	0.068678	0.273816	0.134063	0.21297	0.0549811	0.080247	0.0776209	0.0389444	0.134784	0.099781	0.0896908	1.62099	0.204751	0.148436	0.0940301	0.19589	0.084212	0.101355	0.037081	0.0979264	0.0578072	0.094989	0.0366003	0.0782491	0.129228	0.613908	0.671027	2.31294	0.416893	0.177828	0.61723	0.388767	0.367526	0.170441	0.150741	0.37326	0.414073	0.0960035	0.153324	0.0433013	0.172554
Solyc01g007690	82.8367	Expressed	0.0633333	11.463	1.76242	2.2284	0.267936	0.510055	0.14277	0.28306	0.440766	0.270216	0.336015	0.522213	0.66679	0.160851	0.170831	1.70777	0.031798	15.9698	0.602944	0.647037	0.308585	0.237289	0.275874	0.278239	0.393433	0.244813	0.331298	0.274238	0.599097	0.333626	0.525997	1.77732	0.12441	1.5253	4.9331	0.653389	2.68459	0.974256	0.601143	0.420724	0.904971	0.927569	0.990744	0.273937	1.44997	0.216449	1.12814
Solyc01g007700	5.0075	Expressed	0.112151	0.0766485	0.03	0.0478714	0	0.0225	0.0225	0	0.0291548	0.0325	0.0275	0.0475	0.0225	0	0.03	0.034641	0.3646	0.118989	0	0.0409268	0.0325	0.0325	0.0275	0	0.035	0	0.0600694	0	0	0	0.0225	0.054064	0.23	0.175024	0.0419076	0.03	0.0551324	0.0817007	0.0598609	0.0275	0	0.0488834	0.229637	0.0225	0.130855	0	0.05
Solyc01g007710	461.083	Expressed	0.163333	24.8951	1.64922	4.95637	0.981906	0.150076	0.422581	1.22774	1.015	1.04868	0.894021	1.0819	1.76389	0.594578	0.831097	5.43964	0.0898765	43.8001	1.85698	0.956159	0.629299	0.399716	0.438083	0.386372	0.608747	0.740602	0.606319	0.660221	1.05909	0.892048	1.18714	7.15015	0.374937	10.3935	8.66221	1.316	6.60092	1.86538	2.26165	1.0398	2.23996	1.82486	1.87898	1.50311	2.86134	0.717966	2.86465
Solyc01g007720	1123.41	Expressed	1.72792	40.39	3.26057	8.84159	1.46448	0.536709	3.03259	1.42172	1.6838	1.44175	1.22088	1.70089	2.9363	0.690837	1.39147	7.64518	1.90056	75.1356	4.00564	1.87096	1.13564	0.66289	0.823058	0.669482	1.68567	1.42719	0.921741	1.16052	1.43951	0.777528	1.92721	9.98435	21.668	49.008	22.6884	2.70562	13.1893	4.60602	4.22562	3.40715	4.91649	3.52226	2.73357	2.16087	4.61862	1.09878	4.77652
Solyc01g007730	1.96	Expressed	0.0731057	0	0	0	0	0	0.0225	0	0.0275	0	0	0	0	0	0	0	0.12	0	0	0	0	0	0	0	0	0	0	0	0.0325	0	0	0.025	0.23	0.181138	0	0	0	0	0	0	0	0	0	0	0	0	0
Solyc01g007740	97.05	Expressed	7.45768	1.48192	4.55433	2.37485	3.74973	0.728486	1.67522	0.959019	3.31814	2.07868	2.8419	1.54801	0.777207	4.98118	4.92506	3.90325	4.50281	2.10929	5.16511	5.46948	2.56798	2.236	2.94239	1.30804	2.1998	4.60643	2.37687	2.11999	4.74855	2.45744	5.3228	5.36758	10.0957	1.08253	2.67737	5.38405	1.98983	1.14742	1.87425	1.86661	2.38143	1.65895	1.57302	2.9001	0.735561	4.85906	3.25279
Solyc01g007750	24.0867	Expressed	1.59906	1.15756	1.60874	0.858432	1.24825	1.66711	1.16003	0.812572	0.448653	0.652398	0.318303	0.573997	0.759238	0.644942	0.472006	0.605108	6.40501	0.679148	1.69621	2.06719	0.951826	1.44183	0.902177	1.31527	1.55843	1.07	0.916374	0.521744	0.79805	0.451848	0.968478	1.16125	4.82126	1.91744	0.591101	0.677402	0.539095	0.383297	0.422404	0.955261	0.549065	0.622495	0.672632	0.583643	0.288224	0.649594	1.28008
Solyc01g007760	48.9475	Expressed	2.56906	0.467948	0.378539	0.508404	0.53283	0.442907	0.501288	1.14815	2.35627	1.4297	0.96082	1.27961	1.17748	1.70266	0.89485	0.535823	5.38437	1.16328	0.937411	0.953357	0.755241	0.997074	1.71648	0.730148	1.74454	1.61656	1.04317	1.0559	1.66536	1.46476	1.49152	1.0399	0.539918	2.74409	1.54335	1.26533	1.26644	0.734534	0.438111	1.09875	0.838663	2.32925	0.953764	1.38306	2.63725	0.953165	1.5561
Solyc01g007770	45.0967	Expressed	0.763421	0.916579	0.370841	0.654311	0.282618	0.261769	1.19215	0.174404	0.888748	1.08655	0.355419	0.423015	1.12222	0.754464	0.37391	0.956905	1.32133	0.637371	0.291805	0.223658	0.170361	0.144012	0.254603	0.181171	0.728599	0.35736	0.304833	0.593731	0.902177	1.04532	0.684706	0.75337	0.75309	0.957305	0.384242	0.259743	0.0660177	0.136534	0.256158	0.12284	0.161419	0.356674	0.158397	0.351695	0.29617	0.204145	0.207385
Solyc01g007780	144.59	Expressed	0.300222	0.213307	0.297013	0.0774597	0.185354	0.377602	0.171901	0.0585235	0.0896753	0.206695	0.126252	0.418778	0.131941	0.118498	0.0858778	0.246475	18.0367	0.479522	0.322448	0.412563	0.283666	0.374322	0.228815	0.151403	0.319932	0.201593	0.0767029	0.233287	0.188343	0.155316	0.0872735	0.177124	0.79758	0.479803	1.84847	0.696807	0.312903	0.199165	0.239839	0.27918	0.310976	0.549833	0.183485	0.103642	0.136809	0.244519	0.0458939
Solyc01g007790	41.8433	Expressed	2.91357	2.26852	1.2337	1.70483	1.15238	0.688336	0.704994	0.532306	0.555133	1.37742	0.586904	0.501365	1.88306	1.68329	0.33234	1.03445	9.50582	1.28416	0.243447	0.781456	1.01295	0.720295	1.03463	0.741743	1.37267	0.322655	0.771971	1.87435	1.03137	0.838799	1.4197	0.879635	3.46833	2.47327	1.05148	0.84977	1.04799	0.462338	0.928233	1.58022	0.975247	0.715326	0.681261	1.27196	1.62334	0.830943	0.839886
Solyc01g007800	14.96	Expressed	5.80463	0.52152	0.0452769	0.0288675	0	0	0	0	0	0	0.0225	0	0	0	0	0	0.183515	0.252599	0.0723994	0.0775	0.0275	0	0	0	0	0	0	0	0	0	0	0	0.0409607	1.068	0.113385	0.0204124	0.0839146	0	0	0.02	0	0	0	0	0	0	0
Solyc01g007810	7.3875	Expressed	0.629453	0.612269	0.116261	0.025	0.065	0	0	0	0	0	0	0	0	0	0	0	0.136667	0.620652	0.0906803	0.0506623	0	0.03	0	0	0	0	0	0	0	0	0	0	0.0233333	0.0272845	0.259824	0.023585	0.0919579	0	0	0.0325	0	0	0	0	0	0	0
Solyc01g007820	7.92	Expressed	1.57167	0.198678	0.175707	0.185039	0.320988	0.185938	0.230705	0.186475	0.193493	0.24274	0.0980965	0.331244	0.128087	0.117642	0.208026	0.0225	0.978712	0.317359	0.162558	0.352775	0.332791	0.234485	0.146884	0.35058	0.150914	0.316396	0.271612	0.322193	0.125657	0.210649	0.206982	0.310949	0.396667	0.165764	0.325816	0.100871	0.211443	0.225259	0.112287	0.289511	0.196188	0.160384	0.297616	0.147443	0.33429	0.194395	0.268049
Solyc01g007830	1.275	Expressed	0	0.0570088	0.0575	0.0275	0.125258	0.0426956	0.0978945	0.103521	0.162173	0.122636	0.122644	0.160753	0.076635	0.125789	0.0533854	0.0884473	0	0.0545245	0.0725	0.171385	0.0970824	0.0533073	0.0959492	0.222523	0.11884	0.045712	0.162089	0.0729155	0.0634265	0.18378	0.0917764	0.204751	0	0	0.0295452	0.0698063	0.0658755	0.136588	0.145516	0.108272	0.151052	0.119094	0.0636396	0.115289	0.158186	0.0823989	0.0285774
Solyc01g007840	175.69	Expressed	4.51487	0.748677	0.882473	0.230832	0.795313	0.432981	0.586416	0.488109	0.872224	0.70919	0.838908	0.970296	0.536647	1.90778	2.1748	0.173638	5.66607	0.325998	1.7955	2.47221	0.918091	0.81225	1.18984	0.807259	1.0772	1.47228	1.08146	0.709888	0.778046	1.02868	0.954817	0.876778	28.0253	5.23661	1.8601	2.07831	0.315869	0.482174	0.950929	0.604635	1.01347	1.12837	0.929839	0.955915	1.32593	1.90945	1.18802
Solyc01g007850	15.005	Expressed	0.163333	0.287442	0.556432	0.148183	1.23726	0.283637	0.778963	0.653491	0.600743	0.557778	0.19224	0.935975	1.27708	1.00974	1.14324	1.01071	0.03	0.40052	0.372522	0.444419	0.592804	1.19621	0.612604	1.23813	0.310332	0.719965	0.5475	1.03887	1.04631	0.610601	1.33375	1.0206	0.07	0.358624	0.727294	0.639471	0.499606	0.183053	0.622835	0.384372	0.384802	0.458446	0.422818	0.768966	0.576865	0.640395	1.10549
Solyc01g007860	1809.71	Expressed	112.146	12.205	6.719	3.89137	8.54064	7.7501	10.4227	7.43255	3.14711	9.29086	6.38384	7.48284	7.37222	3.689	8.93657	5.74909	83.3131	8.64702	9.58952	22.0346	8.26553	6.40371	11.6452	8.85965	10.8649	9.48639	8.64512	4.47287	7.54509	4.20105	8.62625	4.92659	34.3032	16.1743	4.41784	12.6499	4.08944	3.62723	1.71743	7.65554	4.09251	2.12755	4.50377	5.72545	4.97576	4.73821	4.98258
Solyc01g007870	70.84	Expressed	0.577187	4.28055	2.74558	0.137538	0.297181	0.118418	0.148352	0.198935	1.23975	0.211601	0.200541	0.775048	0.629025	0.687124	0.178559	0.174994	0.944975	1.84721	0.41066	0.456296	0.372925	0.208142	0.194738	0.0447912	0.0579332	0.110378	0.0557524	1.44426	1.37161	0.687063	0.146088	0.114483	0.843827	0.211686	0.629343	1.1709	0.663193	0.126647	0.180849	0.230086	0.162711	0.331848	0.0320156	0.0327872	0.160286	0.11	0.041508
Solyc01g007880	27.96	Expressed	0.28746	0.945736	1.36698	1.61967	0.480666	1.12654	0.487295	0.911638	0.537671	1.00336	0.703551	1.16498	0.912975	0.450174	1.01557	0.624293	5.86435	1.21912	1.17056	1.47281	0.634862	1.45195	1.15511	0.710603	1.58767	0.576484	0.977202	1.1962	1.02842	0.787532	1.00837	0.986196	1.46361	0.732416	0.368881	0.795973	1.27059	0.857117	0.511126	0.717581	0.41252	0.524728	0.660126	1.10342	1.03906	0.826463	0.922831
Solyc01g007890	104.785	Expressed	0.676494	0.560067	0.398633	0.321157	0.216121	0.250878	0.269645	0.160643	0.148857	0.110557	0.164842	0.075111	0.0852814	0.0636396	0.0925563	0.0732575	0.647311	0.907619	1.18467	1.10215	0.125789	0.492838	0.290441	0.181705	0.283854	0.13629	0.203756	0.165454	0.427051	0.112203	0.191589	0.152042	0.182787	0.1	2.00081	0.606094	0.236903	0.137871	0.150409	0.151272	0.0554527	0.0402078	0.089861	0.0409268	0.120442	0.090312	0.0652399
Solyc01g007900	46.47	Expressed	5.8458	1.15982	0.476014	0.564511	1.34074	0.224796	1.23976	0.764619	0.694826	0.923156	1.03349	0.890445	1.66929	0.630098	1.0785	2.0331	2.47706	1.03406	1.06649	1.0057	1.59738	1.46548	0.767022	1.62611	0.36516	1.76803	0.803724	1.35939	2.25125	1.29998	4.47762	2.39055	5.16766	1.59434	0.741536	0.845232	0.961535	0.213424	0.788336	0.808263	1.15224	1.83709	1.65651	0.971974	1.65296	0.896182	1.86901
Solyc01g007910	236.107	Expressed	6.86801	2.20728	4.97957	2.08059	1.68976	3.08186	0.483468	2.00187	5.84678	3.90859	1.48521	0.968034	1.87931	2.26069	3.47817	1.29785	92.7433	3.09738	4.47496	2.61346	2.45942	3.36687	2.06463	2.32765	3.24576	2.78275	1.57563	1.91052	0.697834	2.94494	2.44808	1.88464	24.1533	19.0692	1.29461	2.2331	1.45178	1.12767	1.17079	1.88774	0.710276	0.448795	0.974701	2.05072	1.55252	0.915487	1.41965
Solyc01g007920	68.26	Expressed	1.29642	0.663739	0.849201	1.42943	1.8425	2.20487	1.5554	1.40791	1.85195	1.63665	1.50052	1.41657	2.1296	3.99206	1.30434	1.80147	4.20359	0.588458	0.62853	0.796988	0.803399	0.997659	1.97992	1.61491	2.70043	1.03493	1.61023	3.02672	2.06447	1.92454	3.02951	1.27335	3.01284	0.781729	0.634775	1.50235	2.52151	0.80714	1.57991	1.25088	1.32629	0.995083	0.722385	1.86773	1.01649	1.36357	1.23252
Solyc01g007930	122.107	Expressed	21.4749	0.394343	1.02392	0.879511	0.858841	0.638997	1.22394	0.32671	0.385516	0.68047	1.06279	0.554527	0.582843	0.879896	0.219559	0.387782	39.8082	0.418656	0.332976	1.0539	0.877509	1.46505	0.491808	1.04474	1.00576	0.988977	0.802553	0.0717635	0.509058	0.548984	1.12941	1.15313	32.079	4.43299	0.314987	0.453604	0.345507	0.711196	0.193536	0.456152	0.878297	0.571509	0.61636	1.02384	0.325022	0.727088	0.954437
Solyc01g007940	324.707	Expressed	0	0.02	0	0.065622	0.131426	0.18821	0.0660019	0	0	0	0.0275	0	0	0	0.045	0.03	0	0.02	0.0950877	0.732171	0.606122	1.20349	0.112796	0.0320156	0.0775	0.1525	0.075	0.0625	0.194353	0.275	0.0754293	0.276778	0	0	0.268732	2.26014	0.916592	0.214515	0.742881	0.343108	0.735871	0.309687	0.180156	0.174881	0.823685	0.138954	0.294364
Solyc01g007950	38.8633	Expressed	0.535195	1.52113	0.569464	0.309973	0.288285	0.109345	0.375156	0.265938	0.592964	0.810195	0.595628	0.14209	0.20168	0.156011	0.148829	0.356441	3.93189	0.475874	0.498247	0.242573	0.231206	0.277624	0.272683	0.425585	0.206579	0.309741	0.1796	0.247218	0.276059	0.0730867	0.267862	0.269382	0.364341	0.447561	0.788802	0.535514	0.74213	0.450821	0.37822	0.211916	0.0992052	0.351007	0.0732575	0.251876	0.180877	0.238585	0.308663
Solyc01g007960	0.3875		0	0.0325	0	0.0275	0.0646787	0.101026	0.0644205	0.0570636	0.124591	0.0831164	0.0876071	0.0725	0.045	0.0615596	0	0.0575	0	0	0	0.025	0.0225	0.034641	0.0348807	0	0.0660177	0.0515388	0.0262996	0.0225	0.0544671	0.071923	0	0.025	0	0.0333333	0.075	0.0635085	0.03	0.02	0.0442295	0	0	0.03	0.0275	0	0.035	0	0
Solyc01g007970	1.57	Expressed	0	0.0352077	0.121587	0.0940301	0.291119	0.150076	0.323944	0.0623164	0.108819	0.229288	0.0590903	0.0256174	0.140794	0.172264	0.0786739	0.0858657	0	0.0638357	0.150907	0.156704	0.104722	0.0818026	0.044441	0.135731	0.0306526	0.130064	0.0848896	0.0652399	0.0384057	0.151548	0.11811	0.0668799	0	0	0.0925113	0.123221	0.158061	0.0368556	0.0776075	0.0371932	0.0411045	0.0462781	0.0489898	0.0259808	0.0390246	0.0367423	0.0475
Solyc01g007980	39.9325	Expressed	1.82731	0.310269	1.69831	0.811833	2.64631	3.67265	2.21467	1.30086	1.59783	6.06985	1.49769	1.26316	1.54774	0.758112	0.995418	0.203408	5.89087	0.986137	1.5768	2.16558	0.883312	0.896022	1.59066	0.966333	1.14312	1.13511	1.33614	0.970862	1.70829	1.17428	0.436566	0.984742	0.35272	0.307155	1.08719	0.794775	0.373996	0.495387	0.423015	0.468764	0.177036	0.260032	0.338904	0.192397	0.41752	0.135923	0.439685
Solyc01g007990	29.73	Expressed	1.71083	0.932005	0.930345	0.717988	0.732086	0.959249	1.217	1.27564	1.25215	0.774945	0.542663	1.06856	1.04777	0.328592	0.147479	0.502666	5.59215	0.878221	0.612799	0.232271	0.384261	0.146771	0.900486	0.458576	0.648477	0.648652	0.662231	0.273343	1.08202	0.511924	0.612037	0.43149	2.09459	0.194679	0.461219	1.03873	0.508888	0.312367	0.292756	0.522031	0.27201	0.430898	0.795707	0.826775	0.765238	0.157023	0.461761
Solyc01g008000	4281.23	Expressed	133.258	23.1775	17.2399	27.5891	70.2316	49.1584	64.7208	44.9138	42.241	49.9579	31.0032	34.2469	91.1456	14.0507	21.1886	15.9547	144.958	20.4178	28.3074	81.8051	43.5946	108.8	106.101	90.9592	145.445	75.1808	78.8571	24.8496	7.75941	35.5752	41.1841	26.2907	58.1872	9.47385	24.7911	40.8807	30.2885	46.3152	46.9559	48.6612	16.5631	31.5546	23.9069	48.5356	23.1948	23.4909	37.076
Solyc01g008010	147.137	Expressed	7.79389	0.546403	0.351529	0.524394	0.565293	0.616475	0.713972	0.807325	1.03824	0.771302	1.00351	0.399385	0.693125	0.286745	0.351316	0.24428	2.79572	0.993507	0.657071	0.540293	0.772976	0.51861	0.480069	0.377036	0.285044	0.746507	0.548156	0.453973	0.463501	0.366023	0.440322	0.414337	4.40344	1.35762	1.4888	0.837223	0.293439	0.830391	0.297839	0.9361	0.690477	0.728073	0.72765	0.295198	0.385886	0.515518	0.379635
Solyc01g008020	61.3433	Expressed	4.62813	2.22065	1.74605	0.992228	0.462178	0.199724	0.303123	0.428454	0.157215	0.181171	0.0881287	0.0275	0.0760893	0.0104083	0.03	0.0425	3.1589	1.49359	2.66169	1.17233	0.483949	0.205467	0.174308	0.143817	0.0660177	0.100706	0.157553	0.0209662	0.0319831	0.0531311	0.08	0.0919579	19.0913	1.43262	2.54196	1.22418	0.890893	0.132225	0.173037	0.296687	0.0721543	0.0450925	0.0929494	0.0327872	0.0366003	0.0525	0.031225
Solyc01g008030	0.37		0	0.0525198	0.0310913	0.0636887	0	0	0	0	0	0	0	0	0.0225	0	0	0	0	0.0563286	0.0396863	0.0275	0	0	0.065	0	0	0.0244949	0	0	0	0	0	0	0	0	0.0375	0.0451848	0.03	0.02	0.03	0	0	0	0	0.0225	0	0	0
Solyc01g008040	0.3075		0	0	0	0.0225	0	0.0539096	0.0636396	0	0.112138	0.0477842	0.0520216	0.0225	0.0520216	0	0.0225	0	0	0.0319831	0	0	0	0.03	0.0275	0	0.0978413	0.0495606	0.0600694	0.0975	0.0375	0	0.0275	0	0	0	0	0.0275	0	0.0262996	0	0	0.0967277	0.025	0.03	0.0540062	0.0348807	0.0175	0
Solyc01g008050	0.1725		0	0	0	0.0368556	0	0	0.0225	0	0	0	0	0	0	0	0	0	0	0	0	0.055	0	0	0	0	0.035	0.05	0	0	0	0	0	0	0	0	0	0	0	0	0	0.045	0	0	0.025	0.02	0	0	0
Solyc01g008060	125.797	Expressed	13.3803	2.69018	1.2574	2.43684	1.47627	0.825353	1.71832	1.92201	2.07317	1.4014	1.12415	0.46102	2.27035	1.44646	1.64327	0.981984	13.1848	1.90544	0.623984	1.42302	1.66214	1.33507	1.98261	1.39638	1.57616	1.44234	0.739504	0.997358	2.7905	1.67731	0.414528	2.94392	34.5026	3.66965	1.10382	1.94205	1.75045	0.590104	2.25662	0.633461	0.876385	0.818647	1.36161	2.47966	2.1278	2.11072	1.2415
Solyc01g008070	464.97	Expressed	119.739	0.3563	0.864459	3.2967	2.93439	3.89592	3.29385	1.33929	9.73235	4.75547	5.03925	2.49741	7.75304	5.76029	6.9354	4.05976	2.6983	1.67606	2.10137	1.92863	2.07927	2.57469	2.72104	2.42062	10.8996	3.75566	4.182	5.24068	5.93004	2.23738	16.528	8.47253	64.3877	66.046	1.14989	4.71745	1.62884	3.16533	2.40899	2.12505	5.18717	13.7822	2.5488	8.96006	7.62516	0.796534	5.41866
Solyc01g008080	15703.1	Expressed	1853.57	171.282	40.4911	59.9961	24.745	25.8091	34.7441	34.6826	44.138	39.9057	31.0563	20.596	22.8248	9.16643	27.019	12.5125	459.072	149.93	95.6727	29.5398	28.3501	27.3053	112.18	37.3413	65.3337	39.2082	42.9044	11.4524	7.11815	7.89012	20.4973	4.66066	947.685	2504.44	45.1487	28.7136	31.3329	36.0876	5.31234	23.8599	3.82892	15.7989	11.1436	5.43055	5.34383	9.37807	16.0652
Solyc01g008090	2582.69	Expressed	257.961	104.626	22.0981	13.8257	5.42523	5.23622	8.31842	6.95083	7.64925	3.81122	6.97383	4.54133	12.6511	4.68357	11.1175	2.56306	112.567	86.883	34.9452	8.81951	6.18935	5.93364	16.5989	6.93609	10.857	6.21414	8.54952	3.98006	4.40864	3.41373	4.97007	2.73901	147.112	185.393	11.2924	8.88175	11.057	8.16052	3.0005	2.02949	5.97719	7.46607	7.4009	5.12156	3.99582	5.32293	5.87932
Solyc01g008100	55.29	Expressed	1.68828	3.23722	2.17718	1.39259	0.727249	0.529819	0.966345	1.07693	0.739509	0.594241	0.755815	0.303466	0.901152	0.0851836	0.884124	0.686408	5.5695	2.6957	2.79895	1.5424	1.435	1.65922	0.797322	1.36935	1.59934	1.8842	1.28628	1.48638	0.472535	0.671508	0.657361	0.465063	9.14704	3.95848	1.30708	1.29349	0.852862	0.865626	0.443415	1.19831	0.39233	0.735952	0.719062	0.624545	0.847657	0.544401	0.313222
Solyc01g008110	3717.36	Expressed	119.253	95.0256	65.098	7.28006	11.7483	7.00003	10.5028	11.04	8.52673	10.7626	15.1556	5.92611	13.6476	7.85961	4.15091	11.2349	50.9781	81.7994	41.5355	11.8306	6.58228	1.76923	7.58818	2.93945	12.1503	6.57616	11.8826	9.20401	5.19617	9.07683	6.4793	16.8938	95.6893	81.102	67.9701	15.9989	7.83047	4.52282	4.48059	4.73777	5.85689	0.745759	6.8255	5.20284	6.20063	6.38337	15.4101
Solyc01g008120	97.455	Expressed	2.42765	2.96184	3.54159	0.492568	2.30722	1.9335	2.65318	2.97955	2.17067	3.64926	2.0757	3.03185	5.74118	2.532	4.81496	2.50271	3.26593	2.61295	2.72509	0.936762	1.79428	2.62339	5.68796	2.18026	5.44287	1.75692	1.88649	2.28216	3.78911	1.76102	2.36841	4.66043	0.749689	1.85074	1.36498	3.12837	2.49651	2.20409	2.05468	2.61391	2.51298	2.89956	2.7785	2.85268	2.11514	1.91096	2.0412
Solyc01g008130	31.995	Expressed	1.49791	0.174899	0.408378	0.885574	0.86063	0.442248	0.372299	1.22089	1.04542	1.10142	1.91563	0.292158	0.2725	0.337228	0.450611	0.424264	2.4622	0.355762	0.195422	1.67375	0.393637	1.60714	1.38686	1.29153	1.29248	1.37234	0.89391	0.273599	0.322526	0.171531	0.156065	0.119513	3.69501	0.617234	0.554773	0.712981	0.198599	0.461284	0.12939	0.330227	0.136412	0.188326	0.0977241	0.11199	0.100042	0.0466369	0.0204124
Solyc01g008140	153.317	Expressed	7.51179	0.654782	0.469139	0.256027	0.927311	0.590316	0.406025	0.973336	1.15465	1.4079	2.44803	1.323	2.34298	1.90643	1.02976	0.707743	4.74479	0.419471	1.39179	1.22583	0.99098	0.929627	1.09509	0.942377	1.47609	0.844423	1.82405	0.718685	1.18246	0.248709	0.442097	2.08771	2.13127	1.19876	0.459755	0.71789	1.5674	1.90022	1.0865	1.09973	0.739177	1.3764	0.879986	0.902925	1.27204	0.640091	0.788114
Solyc01g008150	8.59	Expressed	7.21385	0.0660808	0.0554527	0.120485	0.0615596	0.0552268	0.0475	0.0325	0.0548483	0.0325	0.0332603	0	0.037081	0	0.0412311	0.06	0.607106	0.0280995	0.0617792	0.0542179	0	0.03	0.03	0.03	0.0390246	0.0575	0	0.0209662	0.0319831	0.0275	0.0290115	0.0388373	0.232546	0.0666667	0.0625	0.055	0.0618466	0.0209662	0.025	0.0225	0.0291548	0.0450925	0.0275	0.0272336	0.0675	0.0225	0.0160078
Solyc01g008160	78.0133	Expressed	0.993048	1.23268	0.564024	1.4576	1.32803	0.636101	1.10867	0.996368	0.890322	1.63179	1.04583	2.70684	3.31749	2.42889	2.17803	1.71003	5.67505	2.41743	0.654273	1.33126	1.10428	0.796004	0.539058	0.828337	1.66752	1.90925	1.34851	1.88908	2.40403	1.48693	3.52713	2.97786	3.68104	0.97004	0.973956	1.12753	1.30012	0.868552	0.143258	1.2003	1.734	2.474	1.74111	0.271937	0.635564	1.07183	0.990542
Solyc01g008170	107.642	Expressed	14.9063	1.52838	0.69922	1.10707	0.614044	2.04093	2.44927	1.79121	0.930245	1.24366	1.38261	0.565015	1.77595	1.90169	1.15936	0.883048	14.5718	1.75528	1.39988	0.839855	1.32022	1.63644	2.56645	0.89287	2.09737	0.519493	1.72448	1.92203	1.79587	0.721208	1.39564	1.75035	4.40164	5.61164	1.58552	2.29554	1.47027	0.726377	0.457482	1.48124	1.14022	1.88064	0.44615	1.35685	0.970527	1.76912	1.12721
Solyc01g008180	77.935	Expressed	15.1235	0.68602	0.99066	0.905258	0.750015	0.854834	1.67752	1.80395	2.40802	0.963059	0.703628	1.16811	0.709194	0.47985	0.590953	0.618856	9.23676	2.03383	0.487158	0.60905	0.82247	1.38939	0.853722	1.42851	1.82153	0.376217	1.04592	0.529691	0.45345	0.58811	0.823229	0.377459	2.93837	1.5264	2.15911	1.28723	0.623191	0.950531	0.6709	0.567896	0.439856	0.77277	0.336018	0.18643	0.271888	0.509532	0.0806613
Solyc01g008190	8.7025	Expressed	0.04	0.596188	0.345121	0.0902196	0.48977	0.547865	0.660043	0.220166	0.502212	0.791402	0.352361	0.343426	0.800573	0.313485	0.44584	0.2207	0.254973	0.260864	0.333851	0.677783	0.620672	0.44712	0.207726	0.77366	0.690941	0.524158	0.705656	0.46268	0.265848	0.461646	0.271631	0.465553	0.0466667	0	0.153045	0.551521	0.2548	0.222767	0.493278	0.409929	0.241488	0.398902	0.4591	0.648439	0.259467	0.369662	0.47054
Solyc01g008200	14.33	Expressed	1.5603	0.766621	0.370751	0.813279	0.40243	0.551791	0.438805	0.131236	0.476924	0.519477	0.397387	0.266208	0.300915	0.359754	0.82916	0.318051	1.06421	0.260176	0.340597	0.528274	0.299792	0.333941	0.490584	0.437004	0.527974	0.226734	0.730016	0.431999	0.364449	0.576142	0.340698	0.79374	2.81355	0.419537	0.245879	0.3073	0.120173	0.120303	0.429523	0.25164	0.407492	0.59959	0.395524	0.721855	0.855652	0.626157	0.645941
Solyc01g008210	23.3567	Expressed	0.445733	0.774536	0.96575	0.309906	1.1098	0.884256	0.396074	0.424451	0.486801	0.169232	0.310494	0.0980646	0.2222	0.17713	0.0701635	0.0852814	2.60019	0.587346	0.846458	1.06405	0.369152	0.377834	0.236057	0.418537	0.142009	0.123314	0.254243	0.0347311	0.0500625	0.0678847	0.0483692	0.0756086	1.49941	3.84094	0.441182	0.127443	0.133323	0.333676	0.290359	0.241605	0.0504975	0.0922293	0.0668331	0.0913213	0.0780491	0.0282843	0.0497284
Solyc01g008220	5.0925	Expressed	0	0.529864	0.481843	0.146316	0.841279	0.609378	0.25894	0.382935	0.469521	0.138474	0.363533	0.0554339	0.19395	0.123516	0.0770822	0.0721543	0	0.167351	0.563686	0.691091	0.348769	0.158186	0.0986893	0.137265	0.222013	0.0621825	0.178652	0.0720388	0.0715746	0.0471478	0.0699405	0.0785812	0	0.1	0.195037	0.177153	0.125266	0.280193	0.107897	0.155101	0.131236	0.0598609	0.066505	0.160857	0.0534439	0.02529	0.0295452
Solyc01g008230	213.5	Expressed	9.83872	3.70396	3.64158	0.955733	8.18638	5.00102	3.90981	3.62075	3.94552	7.14521	6.94275	2.67138	2.63357	3.73468	5.18153	6.68191	16.666	4.16729	8.00636	17.3745	6.80156	5.77827	7.96302	5.7228	7.25653	8.82616	4.6225	0.870412	3.29248	2.64643	5.00398	5.45579	10.1741	4.33064	2.94784	5.8866	2.94617	4.10339	3.08262	3.92184	2.95525	6.54897	4.39756	6.30099	4.41977	3.83039	4.14158
Solyc01g008240	1.29333	Expressed	0	0.0675	0.0578792	0.0275	0.0525	0	0	0	0	0	0	0	0	0	0	0	0	0.053619	0.0325	0.0275	0	0	0.0275	0	0	0	0	0	0	0	0	0	1.29333	0	0.025	0.03	0	0	0	0	0	0	0	0	0	0	0
Solyc01g008250	70.65	Expressed	2.33516	0.905478	1.24455	0.439858	1.86673	0.505709	0.463087	0.31249	0.547624	0.612541	1.49557	0.664171	1.03185	1.15473	1.02729	0.657597	2.06448	0.868978	1.63231	1.44186	0.83145	0.540948	0.871574	1.05267	0.937855	0.6925	0.439912	0.318499	0.586352	0.31237	0.925783	1.43091	5.82865	2.89065	0.809352	0.928036	0.784634	0.594482	0.446654	0.642292	1.10548	1.15138	1.21342	0.88252	0.826872	1.61163	1.11825
Solyc01g008260	173.357	Expressed	8.46392	0.745233	0.590459	0.26663	0.413126	1.07142	0.505808	1.18256	0.792847	1.02309	1.02185	1.05342	1.95583	0.531115	0.446904	1.59241	59.9008	0.563863	0.366617	0.744618	0.815643	1.25978	0.818988	1.20434	1.59146	0.796025	0.577596	1.03911	0.578019	0.386199	0.740692	1.36137	2.56431	6.78925	1.10158	0.890434	1.08452	0.307744	0.729783	1.21339	0.58652	0.930331	1.14436	0.634619	0.697382	0.553284	0.932818
Solyc01g008270	122.47	Expressed	3.16173	3.86278	0.995695	0.128671	4.12412	3.20776	2.62219	3.31284	1.06876	1.72048	2.53608	1.73387	5.01156	1.80649	3.30434	2.31328	6.16861	1.91589	3.02537	5.22531	1.21762	5.30477	1.36713	7.14509	6.64925	8.54683	7.30846	0.780175	4.04552	1.88415	4.18119	2.48831	3.79452	2.56368	3.91074	1.6495	1.97865	2.05686	3.73271	2.03782	1.67845	3.64215	2.98934	2.80109	2.77132	3.40009	3.00737
Solyc01g008280	77.2775	Expressed	1.9776	1.20504	1.40558	1.75991	4.17955	3.38573	1.91265	2.57463	2.17186	1.80691	1.96077	1.89945	4.60031	0.971523	3.2485	2.02318	2.68357	0.973459	3.8578	5.58392	1.61741	5.13671	0.924941	5.90811	5.9473	8.10791	6.5034	1.39053	4.06049	1.92267	3.88691	2.23773	3.36545	1.27845	0.843953	1.33035	1.33496	1.07783	2.46818	1.68798	1.60712	2.84174	2.41002	1.97533	2.54752	2.16118	2.22286
Solyc01g008290	22.0967	Expressed	6.30574	0.800629	0.709312	0.589468	0.248294	0.33229	0.532893	0.663028	0.64269	0.545535	0.625332	0.384589	0.679441	0.701807	0.439678	0.180416	3.89229	0.773121	0.855813	0.661581	0.440606	0.233292	0.303353	0.458667	0.488757	0.231746	0.796168	0.378448	0.326522	0.464193	0.477884	0.463885	3.57835	0.603112	1.24628	0.414756	0.599547	0.517403	0.47169	0.335336	0.32744	0.654107	0.337602	0.355021	0.333051	0.197837	0.155697
Solyc01g008300	6.56	Expressed	0.845005	0.105544	0.132004	0.186279	0.600283	0.594746	0.263609	0.258376	0.268153	0.353895	0.627216	0.341428	0.429523	0.133978	0.192311	0.263455	2.06984	0.174881	0.222205	0.269815	0.48943	0.224365	0.592176	0.793425	0.593231	0.424971	0.525395	0.114337	0.347692	0.151548	0.245132	0.22265	0.243059	0.216744	0.17356	0.38526	0.0736546	0.193261	0.247353	0.377734	0.296265	0.2505	0.134931	0.112426	0.228888	0.228304	0.158292
Solyc01g008310	129.275	Expressed	4.12598	2.01451	1.27142	2.30159	2.79984	4.24793	3.7481	2.18693	2.48146	4.27382	2.86761	2.78051	7.12978	3.82717	4.85013	1.37221	11.9857	4.43428	2.99022	4.16697	3.59807	0.966463	4.01915	1.71465	4.33285	4.17908	2.96163	3.13736	5.2139	0.598644	2.4972	6.11197	19.075	3.28358	2.50401	3.26237	2.46905	3.61948	1.868	4.05994	2.35264	4.66322	3.48589	3.76606	2.76917	2.90058	1.50104
Solyc01g008320	207.975	Expressed	0.731118	0.883563	0.502046	1.22951	2.63247	0.699469	3.96426	2.21716	4.16946	5.23962	3.65429	3.20227	6.259	4.36465	3.18739	5.25222	1.88287	1.60283	2.22745	1.80872	2.76952	0.843826	4.42218	1.45268	5.92369	4.95512	7.169	2.2071	6.08281	3.50259	2.67435	6.09082	0.928781	0.833833	0.862104	2.77843	2.73338	3.70473	4.34624	5.84643	4.62367	4.95702	6.48415	6.76122	8.22027	6.32295	3.03652
Solyc01g008330	289.553	Expressed	4.65603	13.2433	9.97564	4.94981	2.76326	3.31693	2.54425	2.22162	1.68414	3.63326	1.968	2.75376	6.14973	2.6654	4.70497	3.2769	1.79917	9.7246	9.97827	5.33002	1.7557	2.46716	2.5579	2.7292	1.69352	3.45531	2.18916	1.85885	2.00159	4.59216	2.15396	2.28791	6.94554	11.552	6.72285	3.0408	1.28677	0.753186	2.07334	1.87823	0.734909	2.14583	2.45952	1.96274	2.90988	1.05764	2.24602
Solyc01g008340	20.965	Expressed	2.06803	0.634775	0.399969	0.327567	0.735351	0.540592	0.487588	0.286036	0.821924	0.847791	0.926538	1.041	0.730518	0.959227	0.472352	0.37129	3.63805	1.1903	0.541756	0.913587	0.639909	0.440416	0.754205	0.321999	0.435306	0.629661	0.973562	0.725481	1.14354	0.799347	0.303068	1.94335	1.26858	2.15762	0.65003	0.5826	0.928933	1.33495	0.935382	0.460061	0.247117	0.423763	0.182956	0.588118	0.865886	0.546311	0.627779
Solyc01g008350	131.79	Expressed	19.2227	9.19003	2.60096	1.02202	2.82722	2.54941	0.706311	0.7575	4.19153	1.36211	1.15939	2.04887	1.19721	1.32013	1.72656	2.48782	27.3364	8.73034	3.43931	0.765314	0.585242	5.63088	0.658336	4.04513	5.46861	5.65311	5.06443	3.43848	7.38653	4.07073	6.23476	4.54651	8.54675	3.15476	3.74715	0.311889	1.35526	4.02284	1.04033	0.697531	1.99818	1.7271	3.90424	3.12495	1.13101	2.54971	2.32394
Solyc01g008360	130.995	Expressed	20.5292	9.13612	2.72764	1.17755	2.58309	2.68744	0.592345	0.622983	4.14227	1.4806	1.18857	2.05024	1.34153	1.28624	1.60042	2.51627	27.3396	8.75664	3.28654	0.702037	0.555463	5.50724	0.681744	3.93519	5.53244	5.69015	5.18289	3.48925	7.40942	4.03196	6.27627	4.6179	8.43198	3.29892	3.69882	0.378484	1.25427	3.97588	1.04022	0.684921	1.93975	1.72107	3.9207	3.0786	1.13925	2.49931	2.30457
Solyc01g008370	307.408	Expressed	17.1534	7.01229	3.26096	4.09579	4.2467	3.48707	5.26203	2.3714	2.53506	2.79355	3.19492	3.47711	2.9614	5.13792	4.00869	4.00355	63.5339	4.96451	1.8762	4.98589	3.04736	1.68774	3.88384	5.40641	4.37497	3.21795	2.7081	3.82453	4.45908	4.21464	4.48136	4.50739	25.2811	22.9307	8.26389	5.57177	0.309758	3.08575	3.92215	6.08744	4.76462	2.26767	3.34441	2.38911	4.10257	5.9246	2.74647
Solyc01g008380	1.4475	Expressed	0	0.262182	0.136657	0.0554339	0.101684	0.21531	0.193837	0.129639	0.133573	0.085098	0.121861	0.0861564	0.0780491	0.119887	0.0991211	0.123592	0.0666667	0.0599131	0.0531311	0.250778	0.137682	0.164798	0.215576	0.269857	0.108513	0.155697	0.188437	0.09123	0.107112	0.0603462	0.144417	0.165397	0	0.0433333	0.191768	0.111159	0.22342	0.104123	0.179931	0.155476	0.0487126	0.0645497	0.0738241	0.22851	0.215421	0.0759797	0.0465475
Solyc01g008390	0.04		0	0	0	0	0	0	0	0	0	0	0	0	0	0	0	0	0	0	0	0	0	0	0	0	0	0	0	0	0	0	0	0	0	0	0	0	0	0	0	0	0	0	0	0	0	0	0
Solyc01g008400	8.40667	Expressed	4.52033	0.116717	0.0696868	0.106409	0.104762	0.120442	0.0874643	0.138474	0.0279881	0.158008	0.136038	0.0802081	0.0631137	0.143469	0.0287228	0.133448	1.30361	0.146884	0.095	0.155851	0.0389444	0.126557	0.0721543	0.0359398	0.0717635	0.0845084	0.0617792	0.0471478	0.0390246	0.0411045	0.0822977	0.0446047	0.427239	0.923008	0.0889757	0.119652	0.0969858	0.0179699	0.0843974	0.0568624	0.0570636	0.0603462	0.117331	0.0485627	0.0967277	0.0131498	0.08026
Solyc01g008410	0.673333		0.193333	0	0	0	0	0	0	0	0	0	0	0	0	0	0	0	0.0202759	0	0	0	0	0	0	0	0	0	0	0	0	0	0	0	0	0.0333333	0	0.0275	0	0	0	0	0	0	0	0	0	0	0
Solyc01g008420	14.6175	Expressed	0.04	0.347116	0.658387	0.78434	0.780196	0.739307	0.768325	0.65842	0.41606	0.602168	0.533088	0.130855	0.146828	0.610524	0.0292617	0.174708	0.543538	0.339043	0.152179	0.377448	0.760848	0.369989	0.339313	0.533378	0.216963	0.376439	0.26522	0.170636	0.235425	0.111234	0.0874643	0.168647	0.0233333	0	0.0903235	0.165151	0.288589	0.0998332	0.113312	0.141679	0.0303795	0.0239792	0.0259406	0.109316	0.127671	0.0494975	0.0204124
Solyc01g008430	11.2175	Expressed	0	0	0.0225	0.0225	0	0	0	0	0	0	0	0	0	0	0	0	0	0.0506623	0.136221	0.0292617	0	0	0	0	0	0	0	0	0	0	0	0	0	0	0.194824	0.221825	0.03	0	0	0	0	0	0	0	0	0	0
Solyc01g008440	25.21	Expressed	2.65906	0.32092	0.5817	0.397458	0.936705	0.869247	0.408072	1.18355	0.873121	0.505643	0.99182	0.835408	1.02103	0.724575	1.07147	0.963253	0.959381	0.426661	0.223942	0.409003	0.473504	0.950706	0.576055	0.973726	0.67437	1.39702	0.905948	1.32128	1.23147	0.984958	0.437348	1.18731	2.55365	0.533573	0.439137	0.740552	1.12653	0.424586	0.504191	0.626463	1.43335	1.8365	0.532516	0.43302	1.18111	0.372164	0.883349
Solyc01g008450	0.48		0	0.0225	0	0	0.0325	0	0.0325	0.1175	0	0	0.0225	0.0225	0.0225	0	0	0	0	0.02	0.025	0.0275	0.0908295	0	0	0.0320156	0	0	0	0	0	0	0	0	0	0	0.025	0.0520216	0.0325	0.0409268	0	0.0319831	0	0	0	0	0	0	0
Solyc01g008460	37.5933	Expressed	2.39122	1.07854	0.606506	0.185848	0.935462	1.05462	0.717263	0.573491	0.289295	1.28661	0.910516	0.821371	0.924656	0.748302	0.503463	0.962093	6.67665	0.691604	0.332491	0.548582	0.691942	0.62516	0.447558	0.361556	1.83007	1.19247	1.40571	0.717948	0.956609	0.522213	0.22756	1.53492	14.632	4.71769	0.829628	0.514668	0.317569	0.528969	0.514466	0.270628	0.36052	0.51537	0.575572	0.68798	0.402065	0.246069	0.799349
Solyc01g008470	52.0567	Expressed	2.90446	0.829502	0.468212	0.246792	0.624104	0.283148	0.0689807	0.89136	0.649043	0.639296	0.558338	0.489428	0.403534	0.629464	0.757512	0.375655	3.66707	0.711366	0.993322	1.04273	0.651242	0.426868	0.658489	0.855872	0.76333	0.398359	0.96023	0.681718	0.351982	0.317753	0.407492	0.350809	4.74831	2.2426	1.24276	0.42679	0.363005	0.688275	0.211596	0.878351	0.832481	0.823168	0.283795	0.357596	0.323944	0.33429	0.42437
Solyc01g008480	18.0675	Expressed	0.268907	0.576865	0.59455	0.444829	0.386329	0.704005	1.23247	0.866	0.881886	1.11454	0.569312	1.45444	1.17471	0.712851	0.563492	0.69975	0.181873	0.99255	0.288079	1.14928	0.751713	1.16606	0.801326	0.994379	0.776729	0.84165	0.251628	0.501573	0.660951	1.01141	0.641903	1.38162	0.112891	0	0.565588	0.53979	0.599922	0.934303	0.377425	0.836086	1.09851	0.937772	1.09623	0.651517	0.563891	0.829076	0.777458
Solyc01g008490	33.3767	Expressed	2.3914	0.983492	0.148345	0.235337	0.543114	0.872252	0.40407	1.14571	0.556455	0.674994	0.445991	1.19288	1.75329	1.12363	0.361487	1.35486	4.23844	0.741912	0.30814	0.569071	0.547104	1.24563	0.516728	0.355935	1.24891	1.13726	1.19395	1.43171	0.85403	1.2681	1.21767	1.72801	4.44615	0.631374	0.825	1.2343	1.10019	1.17691	0.603165	0.709066	0.449562	0.963682	1.25067	0.333576	1.68992	1.32363	0.849543
Solyc01g008500	1.2075	Expressed	0.123333	0.0606218	0.0951315	0.0408248	0.132476	0.148233	0.223942	0.094989	0.598294	0.0906458	0.213907	0.0977667	0.0972111	0.0187083	0.0268871	0.100778	0	0.0409268	0.0327872	0.127835	0.168245	0.0952628	0.165044	0.0607419	0.0618297	0.109886	0.0473462	0.0614241	0.100031	0.055	0.0935414	0.0490535	0.0466667	0.106667	0.0559762	0.144943	0.0531311	0.0919579	0.0402078	0.0798436	0.0291548	0.03966	0.0944612	0.0319831	0.035	0.0384057	0.0225
Solyc01g008510	27.86	Expressed	0.163333	0.0458939	0.0525	0.0497494	0.0645981	0.0954812	0.158344	0.143353	1.36994	1.6441	0.578223	3.80799	3.44443	3.08507	1.55126	1.22038	0	0.0803508	0.384599	0.148176	0.0449073	0.124666	0.0856835	0.0614241	3.58836	2.74939	2.60349	2.50111	5.13077	3.43877	1.94437	1.74801	0	0.0404145	0.726894	0.412563	0.366458	1.14355	0.791037	0.762589	0.96009	1.17459	0.21773	2.28081	2.31321	1.45866	2.94124
Solyc01g008520	15.2867	Expressed	2.65587	0.261004	0.311244	0.111131	0.610442	0.390883	0.185697	0.635169	0.426351	0.130855	0.445896	0.0961769	0.115857	0.095	0.168276	0.144417	11.8942	0.28111	0.384372	0.361306	0.0906803	0.0748749	0.426973	0.639067	0.259338	0.156491	0.496712	0.100871	0.208621	0.153209	0.0956121	0.125433	7.66331	0.771514	0.449843	0.30294	0.300111	0.20746	0.252108	0.117713	0.294827	0.113541	0.237851	0.0983616	0.0729583	0.113826	0.113798
Solyc01g008530	45.475	Expressed	0.885569	0.732591	1.40951	0.838375	0.261884	0.315938	0.384217	0.198788	0.455705	0.294996	0.275057	0.542054	0.428921	0.38308	0.0575181	0.0495606	3.62368	1.44021	0.4573	0.6889	0.49979	0.318522	0.159079	0.120095	0.348386	0.249933	0.300361	0.394258	0.113248	0.201784	0.0375	0.084951	1.65425	0.941813	0.791216	0.681585	0.751559	0.31603	0.820823	0.497868	0.129679	0.0567707	0.0897218	0.1425	0.0711073	0.100613	0.0708872
Solyc01g008540	13.4933	Expressed	0.860355	0.723595	0.35433	0.189973	0.0316228	0.1225	0.0325	0.0575	0.686445	0.618026	0.250283	0.851753	0.484792	0.433609	0.0796346	0.03	2.49371	0.215812	0.160072	0.101929	0.0225	0.034641	0	0	0.179002	0.468019	0.245866	0.427695	0.181039	0.19263	0	0	0.0233333	0	0.0583095	0.0291548	0	0.025	0	0.0497494	0	0	0.0483692	0	0.035	0.02529	0
Solyc01g008550	337.727	Expressed	37.1195	15.5412	9.8323	5.83924	0.978965	0.614361	0.927856	1.13286	1.17834	1.4317	1.69294	0.339445	0.800795	1.27815	0.447288	0.929148	43.6814	22.889	8.28078	2.00756	2.20181	1.11543	1.37014	1.27831	0.760267	0.615878	0.345359	0.48148	0.608311	0.401131	0.186832	0.115569	88.5389	10.7298	1.43849	3.11063	0.555253	0.200104	0.977284	0.551944	0.550462	0.238345	0.222205	0.239739	0.261387	0.288137	0.12439
Solyc01g008560	61.88	Expressed	4.12824	0.946277	1.84833	0.284693	0.751403	1.19711	1.5599	0.593022	1.34282	0.541033	1.34562	0.631308	0.524712	0.295438	0.875295	0.541587	25.1341	0.637841	0.0986999	0.253718	0.806798	1.17332	0.90234	0.809191	0.800089	0.24824	0.561375	0.255359	0.481584	0.907537	1.13913	1.31244	4.32769	0.298719	0.917905	0.604971	0.34989	0.677766	0.631946	0.136076	0.466626	0.270077	0.43275	0.824101	0.570132	0.435227	0.361695
Solyc01g008570	0.0525		0	0	0.03	0	0	0	0	0	0.0275	0	0.03	0	0	0	0	0	0	0	0	0	0.025	0	0	0	0	0	0	0	0	0	0	0	0	0	0	0	0.0325	0	0	0.02	0	0	0	0	0	0.0275	0
Solyc01g008580	0.035		0	0	0	0	0	0	0.035	0	0	0	0	0	0	0	0	0	0	0	0	0	0	0	0	0	0	0	0	0	0	0	0	0	0	0	0	0	0	0	0	0	0	0	0	0	0	0	0
Solyc01g008590	0.0366667		0	0.0325	0	0	0	0	0	0	0	0	0	0	0	0	0	0	0	0	0	0	0	0	0	0	0	0	0	0	0	0	0	0	0	0	0	0	0	0	0	0	0	0	0	0	0	0	0
Solyc01g008600	134.775	Expressed	2.66463	6.12779	4.84507	1.94941	1.37784	2.72949	2.28307	1.24411	0.715453	1.4423	1.48305	0.894254	0.89167	1.04472	0.995476	0.361464	0.474213	5.67169	2.91036	4.26298	0.96475	0.542325	1.07995	0.865779	2.14183	1.14587	0.817327	0.282017	0.451966	0.311314	0.585534	0.377787	0.600111	0.918519	3.30631	1.07347	0.345229	0.455327	0.65688	0.716583	0.582056	0.433186	0.940243	0.334474	0.369738	0.906458	0.295533
Solyc01g008610	30.6933	Expressed	0	0	0.025	0	0.0275	0	0	0	0	0	0.03	0	0	0	0	0	0.03	0	0	0	0	0	0	0	0	0	0	0	0	0	0	0	13.9177	0	0	0	0	0	0	0	0	0	0	0	0	0	0
Solyc01g008620	78.385	Expressed	0	0	0	0.0318852	0.0782491	0.131719	0.77529	0.1475	1.48702	0.102021	0.269053	0.0949013	0.0675	0.0347311	0.0475	0.0292617	0	0	0	0.025	0.0636887	0	0	0	0	0.015	0.0325	0.0225	0.0275	0	0	0.0125	0	0	0	0.0225	0.0975	0	0.025	0	0.09	0.0275	0	0.0217945	0.0325	0.279494	0.0375
Solyc01g008640	0.385		0	0	0	0	0	0.0225	0	0	0	0	0	0	0	0	0	0	0	0	0	0	0	0	0	0	0	0	0	0	0.0275	0	0	0	0	0	0	0	0	0	0	0	0	0	0	0	0	0.0175	0
Solyc01g008650	1.21	Expressed	0	0	0	0	0	0	0	0	0	0	0	0	0	0	0	0	0	0.0275	0	0	0	0	0	0	0	0	0	0	0	0	0	0	0	0	0.0280995	0.134412	0.0325	0.02	0.0225	0.0272336	0	0.03	0.025	0	0	0.0275	0
Solyc01g008660	17.5675	Expressed	0.0866667	0.362238	0.702619	0.548974	0.396892	0.591444	0.909808	0.356403	0.47333	0.81346	0.458939	0.512274	0.409173	0.40572	0.264272	0.364897	0.57406	0.67087	0.499439	0.573126	0.426895	0.464363	0.118779	0.5849	0.408952	0.41961	0.445468	0.37355	0.156651	0.354283	0.379833	0.503529	0.143333	0.00881917	0.927851	0.587117	0.620233	0.522861	0.203695	0.385776	0.354762	0.542915	0.284323	0.575558	0.497182	0.739565	0.555735
Solyc01g008670	1.82333	Expressed	0.88065	0.0217945	0.0188746	0.0497494	0.0325	0.0259808	0.0327872	0.0348807	0.0511534	0.131972	0.0792149	0.0882232	0.0430842	0.0225	0.03	0	0	0.02529	0	0.0303795	0.025	0	0.03	0.035	0.035	0.025	0.0319831	0.02	0.0534439	0.0522813	0.0273861	0.0569356	0	0	0.05	0	0.0361421	0	0	0	0	0	0	0.0225	0.035	0	0.02529
Solyc01g008680	1.8675	Expressed	0	0.0636887	0.025	0.0402078	0.0433974	0.0508879	0.0645497	0.106184	0.0744983	0.135984	0.125723	0.105277	0.122975	0.0736405	0.108704	0.19263	0	0.0110868	0.025	0.0802081	0.0551324	0.0988581	0.114264	0.0179699	0.0543139	0.0517003	0.129188	0.179043	0.0986049	0.166183	0.19352	0.321312	0	0	0.0625	0.0607419	0.0317543	0.0262996	0.0377216	0.0613052	0.0828025	0.11898	0.0915605	0.170508	0.132193	0.0578072	0.108704
Solyc01g008690	1.4225	Expressed	0	0	0.0275	0.0592136	0	0.045	0.066505	0.0517204	0.0959492	0.0337577	0.0540062	0.0922293	0.0771362	0.0301386	0.088353	0.165699	0	0.0327872	0	0.00288675	0.0613732	0.03	0.06408	0.0857807	0.0555278	0.0244949	0.0575905	0.11636	0.0896637	0.0751665	0.0849877	0.139344	0	0	0.02529	0.0520216	0.0325	0.045	0.03	0.0319831	0.0906803	0.03	0.00478714	0.0404918	0.0666302	0.080247	0.10116
Solyc01g008700	135.412	Expressed	8.40923	1.4213	0.991304	1.50573	0.78366	0.840243	1.2286	1.1063	5.69466	6.9719	10.7276	2.30708	7.22517	6.75526	2.60283	1.21514	65.2045	0.67798	0.619481	1.11985	0.495133	0.697764	0.793715	0.670067	7.8817	7.71891	10.6779	4.97357	1.45563	3.94732	3.53992	1.59464	8.86049	5.84734	0.37858	0.446549	0.250079	0.405237	0.642526	0.529575	0.364677	0.366674	0.400718	1.1578	1.12463	0.980616	0.939956
Solyc01g008710	2632.43	Expressed	0	0.0449768	0	0	0.438691	0.0801561	0.290441	0.0510514	70.4203	67.8151	38.1953	176.646	268.21	71.9573	146.653	50.3587	0.0333333	0.0388104	0	0	0	0.0646142	0.423301	0.193321	108.567	73.0627	59.7397	98.7927	77.7677	130.321	128.585	27.9316	0	0	0.0175	0	0	0.0798305	0.221712	0.162859	0.0986999	0.327172	0.550399	0.372044	0.778239	1.50959	1.52581
Solyc01g008720	13.7075	Expressed	0	0.02	0	0	0	0	0	0	0.071807	0.257953	0.241678	0.867165	0.545084	1.31979	1.47271	0.178016	0	0.242706	0.220341	0.0986893	0	0	0	0	0.109268	0.0548293	0.05058	0.39708	0.118418	0.211759	0.164469	0.0537742	0	0	0.364509	0.525999	0	0	0	0	0	0	0	0.0225	0	0	0
Solyc01g008730	42.7033	Expressed	2.24049	0.589101	0.209643	0.867616	0.387801	0.821756	0.528102	0.556737	1.75983	1.63497	1.00536	1.33522	0.557756	0.614876	1.24858	1.14868	9.13578	0.758797	0.256657	0.722604	1.01996	1.788	1.5156	1.07284	0.7866	1.64348	0.540098	1.22738	1.8782	1.08022	0.88916	1.17222	7.06017	1.06921	0.91403	0.782411	1.62678	1.84296	1.26481	1.20711	1.24827	2.00478	1.16919	1.28364	0.905304	0.848119	1.03349
Solyc01g008740	2.0025	Expressed	0	0	0	0	0	0	0	0	0	0	0	0	0	0	0	0	0	0	0	0	0.0291548	0	0.0275	0	0	0	0	0	0	0	0.0275	0	0	0	0	0	0	0	0.0275	0	0.0275	0	0	0	0	0	0
Solyc01g008750	0.76		0	0	0	0.025	0.08	0.0458939	0.0347311	0.0275	0.0225	0.025	0.0531507	0.0225	0	0.0638357	0.07	0.0225	0	0	0.0275	0.0545245	0.025	0.03	0.0275	0.0613732	0.025	0.03	0.0340343	0.0425	0.035	0.0275	0.0275	0	0	0	0.0342479	0.0806742	0.06	0.104433	0.117995	0.0734847	0.0380789	0.0595119	0.0450925	0.102987	0.1375	0.0755535	0.0604669
Solyc01g008760	7.7075	Expressed	0.780285	0.232321	0.545451	0.175618	0.405319	0.810612	0.666388	0.674963	0.50024	0.365339	0.453624	0.153154	0.469344	0.616036	0.344529	0.227756	1.2504	0.512744	0.648092	0.105623	0.418619	0.207379	0.612432	0.634828	0.453549	0.294318	0.376926	0.286778	0.583574	0.498038	0.662256	0.181705	2.84781	0.565715	0.293666	0.845304	0.641695	0.584043	0.547211	0.443177	0.4617	0.33551	0.232428	0.358353	0.54975	0.205852	0.133814
Solyc01g008770	78.08	Expressed	2.5231	5.08478	3.49872	2.28797	1.88122	1.92479	2.26023	1.39415	1.75559	1.19183	1.28313	0.86417	1.66828	1.44709	1.17121	0.4518	5.88425	4.60783	2.71789	1.41341	1.97348	1.40826	1.4647	3.14696	1.73632	1.53527	1.22803	1.74478	1.63927	0.95551	1.17559	2.54715	4.49123	0.25658	3.6334	1.38025	1.74954	1.62312	1.90775	1.9575	0.643524	1.37959	1.13683	0.52796	0.713762	1.02299	0.317579
Solyc01g008780	105.058	Expressed	1.56724	0.519663	0.554414	1.34448	1.5693	0.707335	0.876037	0.755705	1.77903	1.34756	2.74761	1.58325	2.27474	2.16597	2.87436	2.92947	1.40488	0.223173	0.331697	1.43093	1.01649	0.623115	0.686651	1.41801	2.43544	2.79752	1.86404	3.03798	2.74035	1.96027	7.06265	4.38028	4.76702	0.0981495	1.52341	2.82575	1.23093	1.78965	1.94475	3.87739	0.72656	1.91339	2.51832	6.70893	2.82264	3.8771	4.92457
Solyc01g008790	156.415	Expressed	0.115326	1.87858	1.53926	3.67995	2.63364	4.18759	3.02803	4.8477	4.92385	4.11948	5.26719	1.24172	0.883982	0.216679	0.4276	0.240256	3.63671	3.40014	2.35783	5.58954	3.0981	1.36131	1.99231	2.6129	1.85689	2.60267	1.61089	0.553617	0.618188	0.232522	0.325192	0.278762	1.47181	0.244427	5.03659	2.11715	2.98152	2.83104	0.814835	1.43935	0.756802	1.07639	0.919592	0.176847	0.164773	0.141215	0.094989
Solyc01g008800	7.165	Expressed	0.491664	0.132602	0.289436	0.411144	0.612432	0.521366	0.43674	0.648363	0.651055	0.616	0.488237	0.478511	0.723435	0.370099	0.433215	0.121244	0.0676593	0.248998	0.333051	0.138526	0.126318	0.222088	0.172307	0.157923	0.211793	0.114118	0.179351	0.154239	0.211621	0.171093	0.0603462	0.200333	0.201191	0.205183	0.0975854	0.312757	0.162147	0.242225	0.303026	0.128355	0.0425245	0.170312	0.132751	0.0889757	0.134249	0.12227	0.0629153
Solyc01g008810	104.75	Expressed	21.4543	1.37914	1.29636	0.669166	0.988357	1.01604	0.498514	1.51921	0.775441	0.971502	0.857312	0.871861	0.592938	0.518947	0.703876	0.66128	29.2393	1.54731	0.709124	0.604297	1.42856	0.65139	1.07577	0.617414	0.33973	0.22321	0.267251	0.873208	0.467342	0.838928	0.62496	1.33099	4.96775	5.19062	1.46524	1.33474	1.3549	0.73299	0.924179	0.286051	0.940854	0.793194	0.486268	0.506563	0.938202	0.949386	0.394427
Solyc01g008820	165.04	Expressed	7.1374	2.44122	2.98432	0.902432	0.772705	0.718301	1.30415	0.556018	1.19577	1.87006	0.745122	1.52436	1.38002	0.835687	1.76376	1.31494	14.8808	1.43022	3.16195	1.04883	0.447928	1.12439	1.01663	0.60228	1.30521	1.14421	1.3826	1.12529	2.28357	0.93814	1.02587	0.868624	13.6049	3.56982	2.06473	1.3073	1.46401	0.840093	0.701546	0.506892	1.77848	1.97964	2.0117	0.491036	1.10677	1.16214	0.934125
Solyc01g008830	12.6875	Expressed	1.4577	0.0738664	0.0804156	0.175831	0.3568	0.246623	0.199562	0.454771	0.151843	0.262472	0.453218	0.174571	0.219863	0.178326	0.274996	0.113459	0	0.093675	0.114673	0.188989	0.127369	0.349604	0.247736	0.626478	0.413005	0.20093	0.801696	0.200603	0.27308	0.150852	0.0852814	0.067992	0	0.126667	0.0478714	0.106331	0.0375278	0.0751665	0.0580768	0.0436845	0.0291548	0.0278014	0.0303795	0.0701189	0.0366003	0.0275	0.0217466
Solyc01g008840	132.575	Expressed	2.64285	6.58581	1.18889	2.17171	3.52614	3.16228	5.36266	1.88021	3.75877	4.21748	5.76988	1.73429	1.85617	7.49506	0.547987	2.46553	3.89395	6.7897	3.68186	1.78064	2.55841	2.31051	4.92547	2.98486	1.56591	7.74384	6.43568	1.64362	1.46978	2.60697	3.18199	3.8507	1.52877	1.57001	3.03248	5.92792	1.62918	2.07873	2.50614	2.34441	2.35991	1.68086	3.20801	4.24206	3.74285	2.94079	4.22535
Solyc01g008850	236.518	Expressed	2.19973	6.83041	3.33681	3.2543	2.79054	2.12409	1.85453	2.2649	11.765	6.53586	5.45087	7.07122	3.55785	4.5126	5.18288	4.28068	2.51285	8.14219	3.22352	4.64054	1.09807	9.62337	5.24274	6.88815	6.82262	11.3544	9.32711	6.43904	1.90239	2.4581	2.09525	3.81118	1.17886	0.997603	3.38445	2.35246	3.54742	3.43606	2.46149	2.79106	3.4749	3.46058	2.38465	3.22815	3.00364	2.8734	5.9127
Solyc01g008860	2.04333	Expressed	0	0	0	0	0.0325	0	0	0	0	0	0	0	0	0	0	0	0	0.0325	0	0.0275	0	0	0	0	0	0	0	0	0	0	0	0	0	0	0.0917878	0.0743163	0	0.025	0	0	0	0	0	0	0.0275	0	0.025
Solyc01g008870	0.393333		0	0	0	0	0	0	0	0	0	0	0	0	0	0	0	0	0	0	0	0	0	0	0	0	0	0	0	0	0	0	0	0	0	0	0.0175	0	0	0	0	0	0	0	0	0	0	0	0
Solyc01g008880	3.5425	Expressed	0	0.0325	0.0320156	0.0478714	0.0477842	0.0225	0.065	0	0	0	0	0	0	0	0.025	0	0	0.0325	0.0225	0.0809835	0.0653676	0	0	0.035	0	0.03	0	0	0.035	0	0	0	0	0	0.0846931	0.252632	0.0325	0.0225	0.0225	0	0	0	0	0.0225	0	0	0.02
Solyc01g008890	70.815	Expressed	4.31889	2.07054	1.33854	0.392916	0.784181	0.892332	1.33236	0.767013	0.863321	0.66757	0.934901	0.672686	1.01576	1.14402	1.02096	0.819658	20.4539	0.509238	0.673874	1.06501	0.899855	1.43584	0.487397	1.14048	1.28197	0.428687	1.08103	1.19072	0.699583	0.338462	0.873313	1.85047	8.33705	1.22543	1.50412	1.15296	0.699862	0.728999	0.70117	1.04237	0.570473	0.696575	1.18857	0.823397	1.16965	0.562339	0.746775
Solyc01g008900	26.5867	Expressed	1.78919	0.763162	0.184498	0.698886	0.439893	0.492857	0.475682	0.317657	0.222374	0.730552	0.799222	0.248294	0.498186	0.655901	0.563388	0.229796	4.91781	0.15551	0.384911	0.337846	0.426094	0.937233	0.380362	0.701332	0.394419	0.28892	0.567691	0.42006	0.737846	0.216429	0.567392	0.830315	3.12359	1.01282	0.534291	0.0980115	0.731589	0.563891	0.228997	0.501853	0.467126	0.478731	0.473946	0.0966523	0.521734	0.107655	0.192916
Solyc01g008910	81.7	Expressed	4.96935	0.0212132	0.256819	0.53408	0.243392	0.101766	0.685303	0.309462	0.268991	0.927069	0.778508	0.625999	0.834669	0.577177	0.325922	0.6661	23.27	0.517162	0.351885	0.35927	0.249445	0.453385	0.748476	0.310681	0.724672	0.452205	0.734853	0.390021	0.873827	0.614781	0.303164	0.771497	7.86546	3.38423	1.0863	0.409316	0.326276	0.606891	0.479835	0.458794	0.495067	1.13622	0.534953	0.752208	0.380709	0.929788	0.889723
Solyc01g008920	16.97	Expressed	0.210317	0.236304	0.167804	0.414457	0.72446	0.636427	0.515825	0.297248	1.18754	1.37261	0.690693	1.21038	1.23067	0.65062	0.23	0.522787	0.161486	0.390096	0.284	0.123356	0.547213	0.319541	0.189759	0.380395	0.726182	0.881971	0.453303	0.257985	0.298674	0.262964	0.240936	0.444194	0.893159	0.316719	0.326761	0.889666	0.543007	0.614505	0.186592	0.751636	0.0641613	0.111692	0.100613	0.319462	0.0349702	0.172578	0.0694022
Solyc01g008930	171.47	Expressed	13.2618	1.42687	1.23182	1.23415	1.28247	0.533237	0.403389	0.448163	1.06076	0.538625	1.62271	0.371783	0.819781	0.614858	0.830868	0.698194	35.6624	1.03383	0.737003	0.873208	0.656157	0.789603	0.421565	0.443593	0.716682	1.14628	0.708261	0.447083	0.512486	0.506919	0.981516	0.708396	32.1281	9.63298	0.369693	0.298199	0.900528	0.51991	0.289522	0.066458	0.17438	0.332625	0.478278	0.299287	0.354833	0.341589	0.158902
Solyc01g008940	61.79	Expressed	0.04	0	0.03	0.0253311	0.0325	0.0225	0.0225	0.06	0	0	0	0	0	0	0	0	0.0333333	0	0.0769605	0.0991211	0.436642	0.233827	0.11	0.025	0	0.03	0	0	0.02	0	0	0.0325	0.492657	0	0.0975	1.0344	0.788443	0.0775134	0.145509	0.14148	0	0.272072	0.0678694	0	0.0366003	0.0175	0
Solyc01g008950	1053.52	Expressed	264.751	16.0465	3.99991	3.78698	7.89433	5.05156	6.90709	6.39627	4.66227	1.71798	7.69241	3.61281	18.5845	3.8751	13.9022	1.90157	110.716	21.4213	10.7387	11.8512	3.55085	6.82224	17.9273	3.40047	5.15312	3.90773	6.76144	9.05309	5.20299	3.06737	3.22407	4.36864	147.082	80.7575	8.32843	9.09113	16.1849	1.41748	6.04257	5.2211	1.45814	4.17679	3.08637	4.31051	5.28548	3.65406	3.37275
Solyc01g008960	1261.51	Expressed	19.3528	23.5658	16.2426	6.48461	6.5299	29.3101	18.1548	14.9899	15.0205	17.2084	20.129	8.51851	4.66115	9.43828	7.32443	2.90908	57.8685	27.541	27.8786	52.2321	18.7717	17.628	26.4717	10.5695	10.944	31.4377	17.8459	6.37834	3.31994	5.63637	11.0089	11.996	45.5155	9.3925	29.4709	35.9588	31.2102	22.5293	21.4295	17.1876	12.1324	27.4745	22.8901	5.12674	4.13905	3.1703	5.55831
Solyc01g008970	1143.21	Expressed	83.6509	22.7661	18.0722	9.79959	27.4411	15.2195	22.0927	14.445	4.06308	12.2724	14.7556	13.0358	4.47003	5.73663	16.6813	4.7141	82.775	26.7508	18.5156	20.4671	26.9015	25.6566	11.4505	5.20817	11.9084	10.1275	4.39457	5.98683	10.8977	8.33141	12.8476	8.37784	28.9635	23.3808	5.98439	40.0065	9.73106	18.0469	9.17262	8.4586	2.58108	10.1282	9.00978	3.64315	4.20445	12.806	11.7658
Solyc01g008980	23.6575	Expressed	0.918041	0.10331	0.806002	0.331244	0.47959	0.409726	0.464794	0.469173	0.211759	0.387825	0.544924	0.644546	0.153045	0.857811	0.060879	0.283707	0.334515	0.393298	0.265248	0.248244	0.69888	0.585183	0.335534	0.73646	0.356099	0.597876	0.890078	0.531058	0.733201	1.08587	0.45331	0.608007	0.418423	0.118509	0.647912	0.524516	0.618991	0.499456	0.425938	0.721854	0.800135	0.751392	0.566721	0.273267	0.389444	0.4656	0.953367
Solyc01g008990	36.305	Expressed	1.35303	1.8808	1.11958	1.12273	1.16919	0.962674	0.675985	1.00987	0.985616	0.916046	0.8595	0.975508	1.10011	1.08677	0.432184	1.60067	5.52097	0.664649	0.648323	1.41745	1.11347	1.13518	0.996045	0.171531	0.316675	0.182683	1.72906	0.536633	0.952295	1.61652	1.2802	1.27712	1.03191	0.308671	1.26417	0.587557	0.69892	0.674443	0.825574	0.856432	0.560692	1.27731	0.56723	0.212701	1.84503	1.45557	1.24216
Solyc01g009000	145.207	Expressed	1.49697	1.74602	2.4561	3.12966	3.54776	2.42464	1.44912	1.76821	2.75063	0.932786	2.92448	1.82864	1.25422	1.18116	4.02496	1.49554	6.17177	1.15571	0.986365	5.9236	2.87025	2.5614	3.81642	2.31139	2.67944	2.33742	3.04471	0.0129099	1.3819	1.62102	1.81591	2.23654	13.4613	2.43641	1.46473	2.08822	1.77241	2.16619	1.26023	2.60345	1.15645	2.09729	1.78886	3.93006	2.13044	3.63007	1.91743
Solyc01g009010	166.39	Expressed	1.05837	1.9996	1.59007	1.54047	1.83307	0.352763	1.03867	1.99076	1.38939	3.34805	1.82574	5.94451	2.35911	6.99519	11.9889	5.86012	3.30552	2.28543	2.33103	3.01962	1.06645	0.907472	1.43717	1.28011	1.19743	0.99092	1.21938	1.96355	4.39171	3.71722	2.63498	5.14673	6.67535	2.34589	2.94441	2.54695	1.02459	1.71573	0.675919	1.40361	6.63034	3.89319	2.70414	5.64789	4.95327	6.38328	4.79404
Solyc01g009020	347.53	Expressed	17.9413	5.01334	2.4605	5.20815	9.88611	22.3951	10.6358	8.6464	9.45355	9.69544	8.80243	6.36398	30.8503	4.56209	18.9175	7.33266	29.0602	8.06555	3.94815	17.5269	5.36089	5.39099	4.955	8.59012	9.19817	2.54639	7.71388	3.40824	8.93889	9.65282	5.1105	4.6465	41.8803	8.95064	2.93227	11.284	4.15263	7.66629	7.97131	4.52996	6.11017	9.17084	4.5627	11.7758	12.9654	10.1582	3.6115
Solyc01g009030	58.2733	Expressed	7.31774	1.4938	0.734817	0.749704	1.97089	0.66416	0.773332	0.585838	1.90307	0.801083	1.05819	0.555133	4.11473	1.59746	1.44533	1.02033	6.27913	1.13078	1.13125	1.21609	0.492274	1.03638	1.21781	0.976468	2.18934	1.10739	0.89466	1.465	1.96681	2.04752	1.74486	0.81805	1.35394	1.98227	1.72281	0.372033	0.852764	0.330429	1.58178	0.645613	0.523504	0.809712	0.825514	2.71863	1.33619	0.744461	0.826089
Solyc01g009040	48.64	Expressed	1.23834	1.28547	0.681877	0.12058	0.128355	0.12278	0.0829031	0.0278014	0.0498331	0.0736405	0.138984	0.106888	0.0618466	0	0.03	0.03	0.0938675	1.76367	0.534141	0.146884	0.0755397	0.0889757	0.100582	0.0666302	0.042106	0.0525	0.0317543	0	0.02	0	0	0	0.875386	3.43412	0.812777	0.260748	0.0942846	0.02	0.0275	0.02	0	0	0	0	0.0275	0	0
Solyc01g009050	90.385	Expressed	2.61003	2.86961	1.46255	0.939029	1.64253	1.36499	2.30166	1.23668	1.06363	1.96342	0.448014	1.78722	1.99531	2.02441	2.591	1.36047	4.42935	1.34401	1.64235	2.57843	1.88622	1.53012	1.63012	2.237	1.4908	1.95981	1.37878	3.36754	2.19487	1.80733	2.35297	4.87014	20.3934	0.780263	0.889742	2.16836	2.60926	0.869582	0.431149	3.20559	0.997885	2.92671	0.784733	3.25095	0.92363	1.89938	3.00774
Solyc01g009060	79.9367	Expressed	3.33629	0.795743	0.59134	1.01893	1.25891	2.1029	0.93442	0.576272	0.983302	1.17829	2.13321	1.66959	2.63309	1.0595	2.25347	1.31578	6.5533	0.41736	1.4014	1.49426	1.11607	0.879454	1.01476	0.78768	0.761681	0.885579	0.875494	2.05761	0.690851	0.756333	1.22227	2.31392	9.44299	1.39055	0.471034	1.5207	2.0531	0.64326	1.38316	0.59709	1.41589	0.818764	0.478583	0.418537	0.903668	0.673183	1.09874
Solyc01g009070	61.635	Expressed	0.333283	0.685979	0.306023	1.20189	0.93839	1.60639	1.18429	0.482759	0.761752	1.9714	1.09287	0.369084	0.890153	0.328393	0.8085	0.0906803	2.25393	1.3858	0.715068	1.80999	1.14651	0.648554	1.96493	1.44775	1.06388	0.838476	1.11828	0.65646	0.911166	0.217294	0.239461	0.668649	4.12033	0.225019	1.47725	1.05958	0.669658	0.959249	0.362652	0.388938	0.562752	0.8125	0.666052	0.83766	0.649769	0.561952	0.504585
Solyc01g009080	44.8225	Expressed	0.95508	1.47561	2.2809	1.52242	1.19788	0.816112	0.879985	0.384651	2.2651	1.09687	1.10437	1.91429	1.81647	1.27861	0.985303	0.705792	4.26267	1.24911	1.24809	0.827733	1.15369	0.686457	1.14526	0.43111	0.719282	1.03898	0.820625	0.380293	0.661778	0.52944	0.185405	0.459828	3.85979	1.67469	0.975793	0.999578	1.5119	0.303946	0.651887	0.244689	0.306414	0.160208	0.134869	0.173463	0.0708284	0.173805	0.123314
Solyc01g009090	202.41	Expressed	13.9715	1.45016	1.33298	0.892422	3.00926	1.54961	2.02602	1.87076	2.67145	0.890659	2.69259	1.7863	1.01375	2.5648	4.49105	1.69655	7.84573	3.10462	1.84191	5.2804	2.31493	1.77745	4.11474	3.7678	3.41668	3.88082	2.83787	2.55783	2.28862	2.17266	3.86415	2.9182	4.10899	2.70968	1.78538	3.98729	3.35711	3.16709	1.73676	2.23295	2.68767	3.93574	1.65311	2.22915	2.31711	1.04256	1.79823
Solyc01g009100	615.093	Expressed	21.9897	27.5802	9.40941	6.75635	2.30828	2.47262	1.36946	2.42778	2.95841	1.74157	2.43225	2.73789	5.57564	1.743	3.94944	1.19342	33.2833	16.1394	11.5541	8.44736	2.93932	1.72536	3.81843	2.46973	0.72852	4.57487	3.21541	0.657147	1.54939	1.2682	1.58917	2.78434	5.76475	68.6788	5.7885	2.81947	1.15335	0.736539	1.41302	2.30969	1.65772	2.85267	1.88734	1.56159	1.43327	0.377213	1.94379
Solyc01g009110	39.3733	Expressed	0.771283	0.779074	0.311164	0.496076	0.565499	0.532563	0.423842	0.366765	0.540607	0.288599	0.307419	0.213503	0.272622	0.610942	0.601228	0.826468	2.81409	0.140594	0.20039	0.93759	0.547835	0.652502	0.774828	0.221454	0.648027	0.318996	0.691211	0.504884	0.431219	0.61866	0.453542	1.67864	4.86988	1.3335	0.0866987	0.317657	0.17956	0.395377	0.685158	0.431149	0.324101	0.830476	0.525854	1.10697	0.687762	0.809115	0.532297
Solyc01g009120	12.0625	Expressed	0	0.19939	0.24742	0.387943	0.362376	0.489804	0.610401	0.305982	0.219825	0.746094	0.334823	0.504752	0.7073	0.318836	0.519343	0.17621	0	0.0844961	0.226546	0.530393	0.236445	0.225555	0.21453	0.342807	0.790668	0.383949	0.206034	0.792559	0.731961	0.495093	0.414095	0.560006	0	0	0.431325	0.216809	0.239322	0.424055	0.46123	0.393065	0.274025	0.363146	0.496731	0.266501	0.694742	0.613711	0.490635
Solyc01g009130	0.025		0	0	0	0	0	0	0	0	0	0	0	0	0	0	0	0	0	0	0	0	0	0	0	0	0	0	0	0	0	0	0	0	0	0	0	0	0	0	0	0	0	0	0	0	0	0	0
Solyc01g009140	0.0366667		0	0	0	0	0	0	0	0	0	0.0325	0	0	0	0	0	0	0	0	0	0	0	0	0	0	0	0	0	0	0	0	0	0	0	0	0	0	0	0	0	0	0	0	0	0	0	0	0
Solyc01g009150	47.6567	Expressed	1.63683	0.791644	1.15604	0.773406	1.02199	0.934678	1.34002	1.09043	0.979698	0.483339	0.239839	0.25718	0.956861	0.920492	1.18905	0.444154	2.65684	0.434978	1.39506	1.73734	0.583458	0.591839	1.02252	0.72973	0.936139	1.59858	0.719959	0.431818	0.622835	0.250699	0.32175	0.349297	6.70098	3.67569	0.935254	1.22551	0.861564	0.629714	0.971686	1.08265	0.149409	0.596336	0.216579	0.777543	0.689376	0.397387	0.684597
Solyc01g009160	99.4075	Expressed	1.92347	0.30434	0.408807	0.377941	0.917283	8.56394	3.58956	0.676799	9.64184	3.66428	1.56755	2.97342	0.773136	0.0579332	0.569422	0.31301	0.199527	2.91091	0.568133	0.108359	0.522534	8.2876	0.819638	0.51825	11.2704	1.98916	2.21404	2.84293	0.933854	0.290818	0.516228	0.559434	1.96012	1.15187	0.980683	0.117854	0.871579	3.15025	1.33154	0.66056	1.9889	0.295113	0.38374	0.843416	0.35708	0.119539	1.05228
Solyc01g009170	658.298	Expressed	7.40873	0.636139	1.25585	1.06397	2.87471	6.93896	3.82324	3.80593	4.73321	5.87531	7.95167	10.3581	5.27517	2.66296	2.74094	1.13825	6.62744	1.51873	1.45675	5.32923	2.1466	8.45913	3.96258	4.99951	7.23446	9.015	3.75483	3.35367	2.46366	5.95421	3.40644	2.62925	26.1134	0.320208	0.951555	1.62207	2.74123	0.391663	1.22298	0.783596	3.60747	2.25588	2.6274	1.98855	3.25163	1.39768	0.778658
Solyc01g009180	89.9	Expressed	5.82023	0.908332	2.1015	1.30724	1.34207	0.756615	2.38436	0.654879	1.38377	1.82828	0.949724	1.17138	2.21486	0.22555	1.80214	1.80948	5.0751	1.97334	2.12255	1.22975	0.971634	0.389944	2.45743	1.50806	0.866039	1.11222	0.36666	2.06709	2.30505	1.71411	1.36821	3.56814	0.785543	2.33577	0.981296	0.533276	1.66313	1.2405	1.22977	1.45318	1.14435	1.33336	0.934853	0.995903	2.16384	1.39752	2.68233
Solyc01g009190	1.3325	Expressed	0	0	0	0	0	0	0	0	0	0	0	0.025	0	0	0	0	0.510816	0	0.0275	0.0317543	0.0325	0	0	0	0.0325	0	0	0	0	0.02	0	0.025	0	0	0.0522813	0.120718	0.0325	0	0	0	0.025	0	0	0	0	0	0
Solyc01g009200	24.83	Expressed	0.925425	0.266783	0.27313	0.225204	0.182409	0.0760482	0.206009	0.192765	0.0471478	0.212544	0.250998	0.0822091	0.168393	0.164184	0.0593015	0.109886	0.768722	0.27559	0.406968	0.452132	0.228377	0.197416	0.113972	0.518465	0.154407	0.181997	0.296434	0.0555278	0.0521217	0.0796215	0.13404	0.0440407	0.0643774	0	0.398706	0.107316	0.150686	0.135239	0.156545	0.107422	0.0475	0.09259	0.0792675	0.0402854	0.035	0.0478496	0.02529
Solyc01g009210	0.095		0	0	0	0	0	0	0	0	0	0	0	0	0	0	0	0	0	0	0	0	0	0	0	0	0	0	0	0	0	0	0	0	0	0	0.025	0	0	0	0	0	0	0	0	0	0	0	0
Solyc01g009220	14.05	Expressed	1.53262	0.214884	0.160234	0.189143	0.084212	0.0535996	0.0362859	0.0278014	0.0466369	0.0606218	0.099781	0.0566238	0.0874643	0.0860596	0.034641	0	2.83598	0.186905	0.129832	0.132437	0.0262996	0.0532877	0.136809	0.196257	0.0496655	0.174093	0.202031	0.0639661	0.035	0.0634265	0.0925	0	0.365285	0.0366667	0.183712	0.045	0.0325	0.0225	0.025	0.0325	0.05	0	0	0.0225	0	0.0225	0
Solyc01g009230	41.1725	Expressed	1.22231	1.11924	0.469758	0.704752	0.665362	0.57897	0.910507	0.630653	1.16646	0.960871	1.07236	1.00385	0.793005	0.656523	0.142273	0.397605	0.564102	1.1459	1.08819	0.727225	0.663356	0.627075	0.799964	1.13307	1.23289	0.993029	0.807583	0.49693	0.456262	0.495133	0.348482	0.484777	0.864414	1.54169	0.602343	0.833297	0.305423	0.345712	1.10841	0.911757	0.182409	0.11583	0.147592	0.147789	0.351117	0.146423	0.154083
Solyc01g009240	2.69	Expressed	0	0.095219	0.0475	0	0	0.0225	0.0398696	0.0470815	0	0	0	0.0225	0	0	0.03	0	0	0.0422295	0.0325	0	0.0286865	0	0.0697615	0.0780491	0	0.0392375	0.0425	0.045	0	0.025	0	0	0	0	0	0	0	0	0	0	0	0	0	0	0	0	0
Solyc01g009250	6.02333	Expressed	0.692949	0.15348	0.110642	0.183961	0.195635	0.229288	0.118418	0.11891	0.137113	0.354142	0.15465	0.207861	0.120925	0.0908639	0.0592136	0.0816879	2.05756	0.355724	0.104831	0.167201	0.115974	0.166458	0.124055	0.363169	0.138834	0.161607	0.178068	0.117145	0.168739	0.140386	0.141215	0.122296	0.564575	0.181138	0.0991211	0.101036	0.105228	0.0909556	0.076635	0.0736405	0.164386	0.0948134	0.00478714	0.14277	0.148464	0.0447912	0.134621
Solyc01g009260	1.765	Expressed	0	0	0.03	0	0	0	0	0	0	0	0.0275	0	0	0	0	0	0	0.0675	0.0597739	0.05	0	0	0.0361421	0.075	0	0	0.02	0.023094	0.035	0	0	0	0	0	0.025	0	0	0	0	0	0	0	0	0	0	0.02529	0
Solyc01g009270	0.5625		0	0	0	0	0	0.0309233	0	0.0575	0.0317543	0	0	0	0.0225	0	0	0.0275	0	0	0	0	0	0	0.0575	0.0355903	0.0160078	0.025	0.05	0	0	0	0	0	0	0	0	0	0	0	0	0	0	0	0	0	0	0	0
Solyc01g009280	83.635	Expressed	1.71764	2.54432	1.28817	1.2737	1.80539	1.69183	2.0072	1.40471	1.75398	1.3939	1.83113	0.882736	2.74769	1.08516	2.90356	1.06837	1.46563	3.23798	1.99749	2.68907	2.25346	1.85684	4.16687	1.1992	1.6491	0.94581	1.70682	0.894123	3.37654	2.38028	0.858364	2.9284	3.53078	0.443672	1.54729	1.89549	2.58237	1.67525	2.98121	2.09097	0.619845	3.89837	1.63707	0.494587	2.72994	0.980442	1.27026
Solyc01g009290	52.45	Expressed	4.29505	1.06229	0.773804	0.379539	0.90405	0.482966	0.588989	0.707724	0.744305	0.736371	0.501703	0.686543	0.537672	0.45742	0.254243	0.640434	8.75462	0.743352	0.648387	0.887969	0.333304	0.293754	0.489087	0.449562	0.909418	0.507894	1.07999	0.848915	1.39075	0.708536	0.457602	1.09226	3.89302	0.439811	1.27949	1.06105	0.460894	0.365704	0.555488	0.511411	0.558396	0.89136	0.816037	0.844318	0.801762	0.524982	0.430368
Solyc01g009300	121.543	Expressed	2.99839	1.80723	2.47333	4.67252	4.76261	2.70743	6.62481	5.21682	6.04694	5.77233	5.508	1.7063	1.8086	1.43961	0.828577	1.1164	3.07257	1.73204	2.90549	1.72048	3.64447	4.162	2.22347	6.92364	5.30006	7.41158	5.73745	0.160488	1.63692	0.854004	0.55626	1.61321	0.523673	0.491675	1.80897	2.77144	3.81436	2.89011	4.08899	3.21824	1.09895	2.7797	2.76959	1.9118	1.61806	1.76796	2.06676
Solyc01g009310	266.387	Expressed	2.01477	4.80496	6.59351	7.16229	5.04747	7.06901	3.7634	12.1369	13.5137	3.87384	7.53155	5.83191	4.30673	2.83427	4.79664	1.95335	4.38376	1.64291	5.96434	12.1074	10.4956	12.7428	7.33459	4.45211	12.529	13.2667	13.7856	4.4703	7.45176	3.14249	3.44128	5.60099	1.33886	1.88466	4.61118	7.88102	6.73106	2.66872	0.826766	3.46247	2.86683	3.24081	4.08234	2.03251	2.43447	2.66907	2.89085
Solyc01g009320	1.22667	Expressed	0	0	0	0	0	0	0	0	0.0225	0	0	0	0	0	0	0	0	0.0225	0	0	0	0	0	0	0	0	0	0	0	0	0	0	0	0	0	0	0	0	0	0	0	0	0	0	0	0	0
Solyc01g009330	0.5475		0	0	0	0	0	0	0	0	0	0	0	0	0	0	0	0	0	0	0	0	0	0	0	0	0	0	0	0	0	0	0	0	0	0	0	0	0	0	0	0.02	0	0	0	0	0	0	0
Solyc01g009340	37.2575	Expressed	0.38602	0.319853	0.259049	0.225919	0.265562	0.0974145	0.146195	0.19431	0.109278	0.24216	0.0535996	0.054064	0.0925	0.0406971	0.0827647	0.0292617	0.393715	0.806438	0.251839	0.338683	0.154596	0.0424264	0.148492	0.233394	0.0964689	0.0579332	0.269537	0.0217945	0.12691	0.169214	0.0481318	0.0239357	0	0	0.234982	0.207244	0.0597739	0.0693421	0.15052	0.0868308	0.0660177	0.0475	0.0275	0.0325	0	0.0525	0.0225
Solyc01g009350	0.506667		0.03	0	0	0	0	0	0	0	0	0	0.045	0	0	0	0	0	0	0.04	0.0275	0	0	0	0	0	0	0	0	0	0	0	0	0	0	0	0.025	0	0	0.0225	0	0	0	0	0	0	0	0	0
Solyc01g009360	0.533333		0	0	0	0	0	0	0	0	0	0	0	0	0	0	0	0	0	0.0225	0	0	0	0	0	0	0	0	0	0	0	0	0	0	0	0	0	0	0	0	0	0	0	0	0	0	0	0	0
Solyc01g009370	86.345	Expressed	0.353459	0.0452769	0.0320156	0	0.0325	0.0919579	0.0405175	0	0.0225	0	0	0	0	0	0	0	0.196667	0.0272336	0.025	0	0	0	0.125632	0	0	0.025	0.0711073	0.02	0.0639661	0.0777282	0.0275	0.0306866	0.03	0	0.035	0.0225	0.0552268	0.373876	0.637552	0.142741	0.297363	0.325141	0.148008	0.344492	0.363808	0.534618	0.0756086
Solyc01g009380	21.0375	Expressed	4.10822	0.0594944	0.712729	0.50109	1.64427	1.02915	1.46305	0.365912	0.940771	0.536895	1.00277	0.540916	0.871847	1.14704	0.400778	0.900984	3.49138	0.623812	0.718726	0.50035	0.535325	0.916924	0.757336	0.43448	0.570102	0.681597	0.561877	0.581822	0.718568	0.284118	0.602398	2.38318	0.742099	3.13892	1.02507	1.13793	0.655952	0.392131	0.819405	0.989431	0.778492	0.941615	0.74576	0.48018	0.90054	0.802126	0.570015
Solyc01g009390	90.2667	Expressed	0.473533	1.07006	0.469776	0.762194	0.527273	0.727889	0.394134	0.153263	0.698455	0.974085	0.720555	0.9794	1.36843	1.30819	1.53479	0.323042	10.356	0.651388	0.587693	0.245302	0.478441	1.04779	0.276808	0.136893	0.649607	1.22712	1.07706	1.12406	1.67174	0.621562	0.461167	1.15376	8.83904	3.03636	1.03084	0.980638	0.658488	1.22599	0.754685	0.288368	0.357887	0.252533	0.852871	0.494745	0.961192	0.348099	0.229215
Solyc01g009400	0.04		0	0	0	0	0	0	0	0	0	0	0	0	0	0	0	0	0	0	0	0	0.025	0	0	0	0	0	0	0	0	0	0	0	0	0	0	0	0	0	0	0	0	0	0	0	0	0	0
Solyc01g009410	0.0633333		0.0633333	0	0	0	0	0	0	0	0	0	0.0225	0	0	0	0	0	0.0333333	0.02	0.025	0	0	0	0	0	0	0	0	0	0	0	0	0	0.0272845	0	0	0	0	0	0	0	0	0	0	0	0	0	0
Solyc01g009420	669.21	Expressed	7.22273	11.9792	5.91323	16.5013	6.43166	15.6311	19.9108	13.4788	11.3948	16.707	7.84482	13.0387	13.3986	2.88568	13.355	6.86086	61.1102	18.7517	4.3337	23.9373	10.3636	6.53818	8.69683	17.3966	15.8515	9.28727	13.188	5.97864	5.51618	11.0936	4.74591	12.396	1.52136	7.42426	4.72946	8.62751	4.48828	1.02515	11.2565	18.3025	6.01093	12.2121	10.5966	10.361	11.4765	4.70056	9.22741
Solyc01g009430	441.673	Expressed	18.8556	1.49805	1.27139	5.0595	4.36143	9.63731	5.50136	3.73538	21.0354	23.6798	37.9493	14.0298	20.2656	15.3991	8.78606	13.4127	17.6394	2.62442	1.56588	1.94468	2.03012	2.88903	6.79508	6.35329	29.4048	13.8703	16.527	17.8283	17.902	14.7208	4.75754	24.6229	9.09007	1.76946	1.98825	2.03234	0.616108	0.815612	0.593119	1.59917	1.21042	0.681921	1.28249	2.03471	2.21472	2.30883	1.48984
Solyc01g009440	0.415		0	0	0	0	0	0	0	0	0	0	0	0	0	0	0	0	0	0	0	0	0	0	0	0	0	0	0	0	0	0	0	0	0	0	0	0	0.0317543	0	0	0	0	0	0	0	0	0	0
Solyc01g009450	61.995	Expressed	1.29095	1.42237	0.636298	0.792037	1.34602	0.859936	1.7012	1.53683	1.26682	2.00062	0.53591	0.896311	1.00058	1.49348	1.86705	1.74374	2.08264	0.643718	1.21409	1.12176	1.27703	1.42458	1.19103	2.01655	4.1461	2.90367	2.0113	1.34877	1.99863	1.53195	3.11047	3.46145	0.443333	0.696882	0.728183	1.55959	0.687985	1.99418	1.47596	2.30348	0.673317	2.68085	1.69509	2.06583	1.00914	1.63825	2.10647
Solyc01g009460	0.965		0.176761	0	0	0.0370529	0.040078	0.0309233	0.0325	0.0430116	0.0428904	0.0600694	0.0377492	0.0425	0.0225	0.0275	0.0225	0.0332603	0.1	0.0319831	0	0.0478714	0.025	0.034641	0	0.0660177	0	0.0525	0.05	0.02	0.0340343	0.0275	0	0	0.291338	0.046188	0	0.0225	0.0675	0.02	0.0663325	0	0.03	0.03	0.025	0.0225	0.0366003	0	0
Solyc01g009470	993.65	Expressed	0	0	0	0	0.0173205	0.378065	0.11098	0	0	0	0	0	0	0	0.115	0.3275	0	0	0	0.139366	0.585363	1.44994	0.0932738	0.154164	0.129551	0.282883	0.0702822	0.0217945	1.31115	0.9162	0.24355	0.779321	0	0	0.0792017	0.290488	1.20817	0.343681	1.08168	0.427442	1.82764	0.791102	0.973673	0.340646	2.54075	1.23901	1.19377
Solyc01g009480	0.3225		0	0.0225	0	0	0	0	0	0	0	0	0	0	0	0	0	0	0	0.0225	0	0	0	0	0	0.035	0	0	0	0	0	0	0	0	0	0	0.0375	0	0.0325	0.0625	0.117898	0.115785	0	0.0625	0.0275	0	0	0	0
Solyc01g009490	0.256667		0	0	0	0	0	0	0	0	0	0	0	0	0	0	0	0	0	0.0272336	0	0	0	0	0	0	0	0	0	0	0	0	0	0	0	0	0.0175	0	0	0	0	0	0	0	0	0	0	0	0
Solyc01g009500	50.4467	Expressed	13.1875	0.42639	0.470981	0.460839	0.957483	0.730153	0.854322	0.525125	0.598837	0.379923	0.730633	0.741401	0.434636	0.474816	0.432037	0.496796	11.4761	0.324101	0.216275	0.291104	0.37761	0.494745	0.533485	0.683159	0.610701	0.6983	0.198725	0.487295	0.282327	0.204873	0.468586	0.412694	2.82393	7.10873	0.56531	0.790141	0.736031	0.228583	0.594746	0.170214	0.311943	0.280576	0.379701	0.236868	0.240104	0.410122	0.244826
Solyc01g009510	90.67	Expressed	0	0	0.041508	0.0596518	0.025	0	0	0	0.0225	0	0	0	0	0	0	0	0	0	0.152555	0.472167	0.277579	0.03	0	0	0	0	0	0	0	0	0	0	0	0	0.408378	1.79329	0.232822	0	0.0225	0.04	0	0	0	0	0	0	0
Solyc01g009520	428.89	Expressed	34.6663	12.9162	4.59675	6.20465	8.52851	4.01215	7.03021	9.428	9.42514	2.31128	4.67695	3.94576	5.86461	3.82196	4.16689	2.865	39.0968	4.5904	4.94418	14.0149	7.94512	7.23945	5.74578	3.16926	8.62272	7.77923	7.70819	2.71022	2.62294	2.64224	3.19395	3.15583	4.63692	19.5188	4.65916	9.3527	6.44101	5.45857	4.95576	2.71642	1.3494	4.9347	4.84193	3.34488	1.5675	3.62456	4.60207
Solyc01g009530	0.125		0	0	0	0	0	0	0	0	0.0275	0.025	0	0	0.0225	0.0291548	0	0.0275	0	0.0404918	0.0225	0	0	0	0	0	0	0	0	0	0	0.025	0	0.0225	0	0	0	0	0	0	0.025	0	0.06	0.0275	0	0.0225	0	0	0
Solyc01g009540	0.075		0	0	0	0	0	0	0	0	0	0	0	0	0	0	0	0	0	0.0246221	0	0	0	0	0	0	0	0	0	0	0	0	0	0.0125	0	0	0	0	0	0	0	0	0	0	0	0	0	0	0
Solyc01g009550	0.61		0	0.0259808	0.0510514	0.0368556	0	0	0	0	0	0	0	0.0259808	0	0.035	0	0.0488194	0	0.0755397	0.0839146	0.057735	0.0436606	0	0.0544671	0	0	0.015	0	0.0246221	0	0	0	0	0.0233333	0	0.0175	0	0.0325	0.023094	0.187506	0.0755397	0.0275	0.155	0.0320156	0.02	0	0	0
Solyc01g009560	0.03		0	0	0	0	0	0	0	0	0	0	0	0	0	0	0	0	0	0	0	0	0	0	0	0	0	0	0	0	0	0	0	0	0	0	0	0	0	0	0	0	0	0	0	0	0	0	0
Solyc01g009570	3.9075	Expressed	1.71555	0.226398	0.143701	0.0318852	0	0	0.0347311	0	0	0	0	0	0	0	0.0225	0	0.588397	0.28779	0.076635	0.0303795	0	0	0	0	0	0	0	0	0	0	0	0	0.231589	0.0635959	0.0499166	0.0262599	0	0	0	0	0	0	0	0	0	0	0
Solyc01g009580	7.305	Expressed	0	0	0	0	0	0.0327872	0	0.0275	0	0	0.03	0	0	0	0	0	0	0.0325	0	0.0478714	0.0613732	0.12413	0.0533073	0.0575	0	0	0.02	0	0	0	0	0	0	0	0	0	0	0	0	0	0	0	0	0	0	0	0
Solyc01g009590	0.0625		0	0	0	0	0	0	0	0	0	0	0	0	0	0	0	0	0	0	0	0	0	0	0	0	0	0	0	0	0	0	0	0	0	0	0	0	0	0	0	0	0	0	0	0	0	0	0
Solyc01g009600	0.08		0	0	0.0225	0	0	0	0	0	0.0225	0	0	0	0	0	0	0	0	0.0275	0	0	0	0	0	0	0	0	0.02	0	0	0	0	0	0	0	0	0	0	0	0	0	0	0	0	0	0	0	0
Solyc01g009610	117.228	Expressed	3.58079	4.84683	1.14794	2.57081	2.22331	3.22881	2.75313	1.2884	2.57653	2.27521	2.04807	0.784627	0.192938	1.7648	0.664392	0.369445	12.7947	2.76655	2.59834	0.834589	1.38454	3.99019	0.56359	5.02353	0.632278	1.13616	1.63889	1.07572	0.930564	0.763997	0.866348	0.624918	11.2732	3.06666	1.43163	3.3909	1.71167	1.01446	0.771442	1.14039	0.366842	0.900161	0.335519	0.612146	0.785381	1.27471	0.774773
Solyc01g009620	61.02	Expressed	4.20818	2.53578	1.58832	0.655647	0.980913	0.6854	0.240879	0.605516	1.22515	1.06805	1.35315	0.723007	1.99571	1.09155	2.11109	0.672649	3.11154	0.671247	0.997099	0.878288	0.897854	0.797083	0.856002	0.686307	0.439344	1.0187	0.83268	0.544554	0.289338	0.633949	1.03829	1.65272	1.12668	4.63347	0.572211	1.36716	1.21148	0.456369	0.412098	0.92128	1.63795	0.744927	0.829649	0.830937	1.27992	1.57313	0.914607
Solyc01g009630	75.17	Expressed	4.28951	1.16615	1.28202	1.30416	1.45765	0.463004	2.17784	0.480215	1.57466	0.99113	1.35247	2.5833	1.38611	0.337944	1.47313	0.329453	9.15107	1.26716	1.12819	2.53594	0.577357	0.698813	1.16284	1.30295	0.726779	1.51912	1.79783	0.776418	1.86352	0.619023	4.09109	2.67822	9.13407	3.03937	1.65652	1.64619	0.440026	1.30657	0.359661	1.28722	1.65456	1.30596	0.821344	1.49768	2.05239	2.14481	1.68989
Solyc01g009640	0.37		0	0	0	0	0	0	0	0	0	0	0	0	0	0	0	0	0.03	0.0643558	0.025	0	0	0	0	0	0	0	0	0	0	0	0	0	0	0	0.025	0	0	0	0	0	0	0	0	0	0	0	0
Solyc01g009650	0.0225		0	0	0	0	0	0	0	0	0	0	0	0	0	0	0	0	0	0	0	0	0	0	0	0	0	0	0	0	0	0	0	0	0	0	0	0	0	0	0	0	0	0	0	0	0	0	0
Solyc01g009660	922.707	Expressed	0	0	0	0	0.101929	0.417113	0.0988264	0	0	0	0	0	0.0225	0	0.07	0.0566238	0	0	0	0.025	0.212539	0.770844	0.184136	0.168325	0.153758	0.345865	0.0675	0.0184842	0.744585	1.13285	0.255518	0.542379	0	0	0	0.053929	0.930076	0.932157	1.02408	0.918876	2.09796	1.51701	0.559717	0.122568	1.32933	0.795837	0.804788
Solyc01g009670	7.6425	Expressed	0.54189	0.64772	0.513101	0.307219	0.156977	0.13351	0.213048	0.00946485	0.151383	0.0899537	0.170514	0.104283	0.0948683	0.0353553	0.0660177	0.0748888	0.0683943	0.400507	0.0744983	0.238205	0.151548	0.183076	0.0739792	0.0732575	0.114483	0.0740495	0.0933631	0.0731437	0.0558271	0.0838028	0.0291548	0.0283945	0.316456	0.693357	0.315974	0.276722	0.128841	0.103068	0.164165	0.084951	0.0253311	0.0790042	0.0595819	0.064727	0	0.0485412	0.0160078
Solyc01g009680	2.3525	Expressed	0	0.110104	0.117995	0.148605	0.0325	0.0225	0	0.0275	0.0291548	0.0895707	0.0332603	0.300527	0.352586	0.330126	0.484991	0.302748	0	0.118418	0.213229	0.0968138	0.0275	0	0	0.025	0.0606046	0.0320156	0.0472582	0.104602	0.0736405	0.107005	0.181676	0.114237	0	0	0.05	0	0	0.02	0.0580768	0	0.125988	0.130982	0.0754431	0.0225	0.065	0.0225	0.0417333
Solyc01g009690	0.95		0	0	0	0.0370529	0.0895707	0.242843	0.144475	0.0570636	0.573977	0.152281	0.129132	0.054064	0.0526783	0.0494975	0.0589491	0	0	0	0	0.0522813	0.0877852	0	0	0	0	0.025	0	0	0.0325	0	0	0	0	0	0.0375	0.0275	0.0325	0	0	0	0	0	0	0	0	0	0
Solyc01g009700	3.21333	Expressed	0.03	0.0217945	0.025	0.0500625	0.0668799	0.0561805	0.0661438	0.0801561	0.869956	0.0531507	0.0825	0.0478714	0.0273861	0	0.03	0.03	0.03	0.0280995	0.0291548	0.0288675	0.03	0.0325	0	0	0.07	0.025	0.025	0.0225	0.0280995	0.0275	0.0275	0	0	0	0.0175	0.0309233	0.11669	0.041508	0.0225	0.0458939	0	0.025	0	0	0	0	0
Solyc01g009710	0.04		0	0	0	0.0275	0	0	0	0	0	0	0	0	0	0	0	0	0	0	0	0	0	0	0	0	0	0	0	0	0	0	0	0	0	0	0.0175	0	0	0	0	0	0	0	0	0	0	0	0
Solyc01g009720	2.0225	Expressed	0	0.0595119	0.0860596	0.0660177	0.0643396	0.03	0.0566238	0.0768521	0.0504975	0.04	0.0529741	0.0225	0.0309233	0.0225	0.0225	0.0225	0	0.0597216	0.0620987	0.0638357	0.0525	0.0552834	0.03	0.0337577	0.0966415	0.0414327	0.0278014	0	0.02	0.0472582	0	0.035	0	0	0.0175	0.0520216	0.03	0	0.03	0	0	0.0303795	0	0.02	0	0.02529	0.0175
Solyc01g009730	0.0575		0	0	0	0	0	0	0	0	0	0	0.0275	0	0	0	0	0	0	0	0	0.0275	0	0	0	0	0	0	0	0	0	0	0	0	0	0	0	0	0	0	0.0275	0	0	0	0	0	0	0	0
Solyc01g009740	0.93		0	0	0	0	0	0	0	0	0	0	0	0	0	0	0	0	0	0.0327872	0.0225	0	0	0	0	0	0	0	0	0	0	0	0	0	0	0	0.035	0	0	0	0	0	0	0	0	0	0	0	0
Solyc01g009750	455.52	Expressed	19.5768	2.82384	7.27894	8.37583	2.79568	6.34344	4.7402	8.41722	7.95073	4.25879	8.20466	5.99427	17.6229	6.25844	32.7608	4.72251	32.0005	4.33343	6.53314	6.39898	4.45824	11.5116	5.6623	13.9077	18.2822	14.812	21.6726	3.11652	18.0026	2.80506	25.9219	7.92334	68.0099	11.832	6.02437	2.50892	3.20233	9.70805	5.55575	8.86421	4.55474	5.21948	9.64502	12.0103	7.8313	15.3958	7.93604
Solyc01g009760	29.0567	Expressed	0.117804	0.112657	0.15025	0.109877	0.152172	0.191763	0.187811	0.551564	0.331122	0.261884	0.561085	0.148633	0.113174	0.270077	0.159191	0.166258	0.447599	0.177735	0.222598	0.224068	0.25339	0.0385141	0.545749	0.0283945	0.275541	0.26927	0.296479	0.3687	0.130224	0.340939	0.0981814	0.151685	0.0272845	0.0433333	0.129253	0.131814	0.219298	0.152062	0.0751665	0.0436845	0.108397	0.218303	0.0968138	0.119757	0.12114	0.0727295	0.0473462
Solyc01g009770	55.23	Expressed	1.88617	1.55211	1.03388	0.296212	0.612718	0.337895	0.225772	0.127435	0.384903	0.506629	0.313528	0.274268	0.647796	0.68523	0.306468	0.298454	2.46543	1.0813	0.637737	0.552064	0.457684	0.148682	0.10781	0.366901	0.873884	1.40363	1.62463	0.203531	0.613655	0.258795	0.234982	0.36484	0.191398	0.53507	0.469778	0.489768	0.107112	0.103552	0.217983	0.0929606	0.78802	0.91047	0.649679	1.09077	0.425999	0.486809	0.97515
Solyc01g009780	90.455	Expressed	9.42392	1.46538	1.05974	2.13638	1.7794	3.34154	4.72083	1.72552	5.61926	3.24312	1.95043	5.50926	1.47453	1.25028	3.05981	1.10497	4.78625	1.47506	0.505608	1.32807	1.01174	1.90778	3.27845	1.19459	3.02662	3.02578	1.5424	0.806095	1.50503	1.27103	2.46023	3.44748	2.4313	0.950269	1.33344	1.80244	0.77502	3.56659	1.02755	1.33077	4.0718	2.79806	1.42203	2.943	5.1814	1.76396	6.28666
Solyc01g009790	0		0	0	0	0	0	0	0	0	0	0	0	0	0	0	0	0	0	0	0	0	0	0	0	0	0	0	0	0	0	0	0	0	0	0	0	0	0	0	0	0	0	0	0	0	0	0	0
Solyc01g009800	0.0725		0	0	0	0	0	0	0	0	0	0	0	0	0	0	0	0	0.03	0	0	0	0	0	0	0	0	0	0	0	0	0	0	0	0	0	0	0.0275	0	0	0	0	0	0	0	0	0	0	0
Solyc01g009810	0.7325		0	0	0.03	0.025	0	0.0675	0.0992786	0	0.309472	0.0625	0	0.0225	0.0193649	0.0469042	0	0	0	0	0	0.0303795	0.0225	0	0	0	0	0	0	0.02	0	0.0332603	0.045	0	0	0	0.0708872	0.0704006	0	0	0.03	0	0	0	0.025	0	0	0	0
Solyc01g009820	49.62	Expressed	0.745453	0.576924	1.3981	0.744273	1.23358	1.421	1.5876	2.27679	1.54555	1.14546	0.954921	1.80813	1.78671	0.831184	1.10973	0.857171	0.777653	0.52028	2.26432	1.12208	1.06987	2.10519	2.41598	0.383862	1.10177	1.53639	0.413851	2.54778	1.82217	1.7749	1.70611	1.84854	1.0274	1.2745	1.46735	1.46382	1.45134	1.14066	0.976664	1.03911	1.31405	1.10522	1.23922	2.04985	2.09215	0.609103	2.21315
Solyc01g009830	32.25	Expressed	1.09368	0	0.0475	0.152151	0.722742	0.113761	0.152062	0.310926	0.327881	0.0901272	0.166258	0.0548483	0.0225	0.0225	0	0	2.29341	0.0570636	0.0275	0.158955	0.26663	0.455092	0.272469	0.519904	0.333242	0.377337	0.451599	0	0	0	0.0593015	0	0.474002	0	0.0175	0.0583095	0.0531311	0.0815858	0.197416	0.104273	0.0500625	0.0278014	0.0489898	0	0	0	0
Solyc01g009840	0.4725		0	0	0	0	0	0	0	0	0	0	0	0	0	0	0	0	0	0	0	0	0	0	0	0	0.0325	0.025	0	0	0.02	0.0332603	0.0275	0.0125	0	0	0	0.0275	0	0	0	0	0.103037	0.0535996	0.0278014	0.0959492	0.0913327	0.0871182	0.0232737
Solyc01g009850	145.693	Expressed	13.036	3.51629	1.87344	1.01683	0.580373	0.589258	1.2332	0.892901	0.875684	0.543775	0.420126	0.344973	2.69395	1.75595	1.42334	1.23699	23.4818	5.7005	1.8839	0.837898	0.585548	0.82503	0.506678	1.36897	1.06972	0.390222	0.967009	1.50814	1.14882	1.27836	1.27905	1.38673	6.21178	3.64168	2.92881	1.65682	1.14349	0.132696	0.646684	1.32523	1.18988	1.73191	1.01916	1.69366	1.0784	0.590387	1.21827
Solyc01g009860	215.045	Expressed	3.21513	1.70791	1.26122	2.86985	1.59036	3.28497	2.28917	1.76985	1.51435	4.46563	5.63748	1.58934	0.914212	1.40383	1.04248	1.06999	1.69852	0.606127	1.87745	4.18546	1.72534	1.5037	1.57499	1.94791	0.32895	1.2071	2.20492	1.49723	1.05275	0.458319	0.821222	1.00419	1.48914	5.37443	2.15869	4.05827	3.15952	1.66704	2.10467	2.93037	1.06223	2.47342	1.52972	1.82776	1.79851	0.77128	1.21362
Solyc01g009870	56.15	Expressed	1.55966	1.61227	0.624638	4.28089	1.60565	2.30488	0.99917	2.85578	1.64151	0.561492	0.784808	0.839627	0.429321	0.120442	0.278104	0.0554527	0	1.19888	0.733557	1.65595	1.27076	3.00978	1.50345	0.850461	0.852539	0.259053	0.31398	0.21272	0.3194	0.136832	0.305352	0.187216	0	0	0.150831	0.0901272	0.187367	0.217577	0.169183	0.204017	0.157394	0.135116	0.0684349	0.0880341	0.143236	0.0790042	0.19276
Solyc01g009880	0.045		0	0	0	0	0	0	0	0	0	0	0	0	0	0	0	0	0	0	0	0	0	0	0	0	0	0	0	0	0	0	0	0	0	0	0	0	0	0	0	0	0	0	0	0	0	0	0
Solyc01g009890	0.0933333		0	0.0452769	0	0	0	0	0	0	0	0	0	0	0	0	0	0	0	0.0425	0	0	0	0	0	0	0	0	0	0	0	0	0	0	0	0	0	0	0	0	0	0	0	0	0	0	0	0	0
Solyc01g009900	2.51667	Expressed	0	0.0280995	0.00629153	0	0	0	0	0	0	0	0	0	0	0	0	0	0	0.0425	0.0275	0	0	0	0	0	0	0	0	0	0	0	0	0	1.8523	0	0	0	0	0	0	0	0	0	0	0	0	0	0
Solyc01g009910	0.74		0.74	0.0477842	0.0225	0	0	0	0	0	0	0	0	0	0	0	0	0	0	0.0275	0	0	0	0	0	0	0	0	0	0	0	0	0	0	0.0466667	0.0433333	0.035	0	0	0	0	0	0	0	0	0	0	0	0
Solyc01g009920	0.9		0	0	0	0	0	0	0	0	0	0	0	0	0.0275	0	0.0225	0.0309233	0	0	0	0	0	0	0	0	0	0	0	0.02	0	0	0	0	0	0	0	0	0	0	0	0	0.045712	0	0.0606218	0.140853	0.035	0.0234521	0.075
Solyc01g009930	0.166667		0	0	0	0.025	0	0	0	0	0.134187	0.0325	0	0	0	0	0	0.03	0	0	0.0225	0.025	0	0	0	0	0	0	0	0.045	0	0	0	0	0	0	0.0375	0.03	0	0	0	0	0	0	0	0	0	0	0
Solyc01g009940	0.153333		0	0	0	0	0	0	0	0	0	0	0	0	0	0	0	0	0	0	0	0	0	0	0	0	0	0	0	0	0	0	0	0	0	0	0	0	0	0	0	0	0	0	0	0	0	0	0
Solyc01g009950	0.105		0	0	0	0	0	0	0	0	0	0	0	0	0	0	0	0	0	0	0	0	0	0	0	0	0	0	0	0	0	0	0	0	0	0	0	0	0	0.02	0	0	0	0	0	0	0.035	0	0
Solyc01g009960	0.0525		0	0	0	0.025	0	0	0	0	0	0	0	0	0	0	0	0	0	0	0	0.025	0	0	0	0	0	0	0	0	0	0	0	0	0	0	0	0	0	0.02	0	0	0	0	0	0	0.035	0	0
Solyc01g009970	48.36	Expressed	3.07318	0.734785	1.02291	1.24343	1.53242	1.11514	1.16239	1.60936	0.905008	1.85755	1.28945	0.231553	2.88225	1.60729	1.54507	0.330517	8.66362	0.347596	1.50416	1.63297	0.730924	0.848394	1.67334	0.886608	1.19834	0.458555	0.981719	1.18034	0.54044	0.556282	2.15005	0.460405	9.5974	0.296873	1.56969	1.94182	0.55373	0.883962	0.332249	0.24878	0.762238	0.719838	1.18647	1.00375	0.502419	1.0635	0.649192
Solyc01g009980	0		0	0	0	0	0	0	0	0	0	0	0	0	0	0	0	0	0	0	0	0	0	0	0	0	0	0	0	0	0	0	0	0	0	0	0	0	0	0	0	0	0	0	0	0	0	0	0
Solyc01g009990	395.52	Expressed	6.55057	12.2275	8.59753	5.53188	4.29585	4.25391	2.68187	3.08766	1.5835	2.61615	2.30732	3.06176	6.57812	1.91391	5.01473	1.83152	13.3831	4.68517	11.6605	2.07762	6.16307	2.07297	2.00625	4.31014	3.35693	3.80013	3.30212	1.70301	3.91771	5.50719	2.77156	5.45257	20.6118	28.6319	10.7	4.95972	5.15258	3.38317	1.80599	4.26861	4.24504	4.1667	3.61755	3.86206	3.51889	3.58338	2.15233
Solyc01g010000	51.2367	Expressed	3.35514	0.997952	0.204629	0.254067	0.678239	0.319827	0.56167	0.540478	0.930632	0.916291	1.39994	0.693908	1.3518	0.673614	0.706505	0.553481	1.06164	0.265122	0.203818	0.919261	0.507599	0.429001	1.02533	0.350746	0.359128	1.1681	1.15732	0.704752	0.837659	0.932564	0.428845	0.302738	1.0561	2.62191	0.756168	0.864836	0.695018	0.693542	0.374555	0.300361	0.554001	0.517935	0.416	0.436816	0.506795	0.486415	0.730529
Solyc01g010010	0.11		0	0	0	0	0	0.0325	0	0	0	0	0	0	0	0	0	0	0	0.0525	0	0.0275	0	0	0	0	0	0	0	0	0	0	0	0.0125	0	0.0333333	0.025	0	0	0	0	0	0	0	0	0	0	0	0
Solyc01g010020	23.67	Expressed	1.09586	0.331976	0.0381608	0.103199	0.310198	0.455869	0.300403	0.463831	0.554204	0.300205	0.293215	0.294406	0.293385	0.0980115	0.184634	0.221185	0.487932	0.623957	0.123356	0.0409268	0.156125	0.115072	0.196654	0.108426	0.0846931	0.086253	0.105436	0.1625	0.043589	0.104911	0.116931	0.113505	0.0120185	0.750489	0.0330404	0.430994	0.163248	0.232845	0.0518009	0.0648074	0.111692	0.0348807	0	0.0543139	0.0348807	0.0175	0.0225
Solyc01g010030	32.2525	Expressed	1.62924	1.08511	1.8992	0.299621	1.11916	0.648169	0.421137	0.4675	0.311859	0.715064	0.379309	0.613574	0.183576	0.413045	1.11393	0.259824	2.17141	2.31086	2.48378	1.81424	0.61274	0.21926	0.288184	0.521967	0.725247	0.529851	0.601457	0.0992052	0.513475	0.456992	0.679687	0.425801	0.307481	0.487887	0.891267	0.878535	0.429988	0.314573	0.28462	0.358059	0.0648556	0.310564	0.183547	0.580264	0.441916	0.184453	0.567706
Solyc01g010040	181.22	Expressed	12.7182	0.912591	2.01292	1.11107	1.69278	0.761479	1.02447	1.17811	0.920136	1.16339	0.720602	0.904093	1.37554	1.12751	0.274177	0.768455	14.4902	2.76512	1.92725	1.44074	0.672401	0.486261	0.719576	1.17859	1.51057	2.14577	0.716035	0.678274	0.882944	0.599291	0.681743	0.289209	33.3403	10.2288	3.11575	2.31923	0.761417	2.42128	1.09187	0.930605	0.524802	1.91421	1.72647	1.15936	2.44445	0.667238	0.806364
Solyc01g010050	181.22	Expressed	12.7182	0.912591	2.01292	1.11107	1.69278	0.761479	1.02447	1.17811	0.920136	1.16339	0.720602	0.904093	1.37554	1.12751	0.274177	0.768455	14.4902	2.76512	1.92725	1.44074	0.672401	0.486261	0.719576	1.17859	1.51057	2.14577	0.716035	0.678274	0.882944	0.599291	0.681743	0.289209	33.3403	10.2288	3.11575	2.31923	0.761417	2.42128	1.09187	0.930605	0.524802	1.91421	1.72647	1.15936	2.44445	0.667238	0.806364
Solyc01g010060	187.493	Expressed	8.98297	0.04272	0.173805	0.0772846	0.217677	0.374597	0.659386	0.1466	2.65875	1.86677	0.611179	1.23564	0.253657	0.152534	0.314679	1.2864	3.26123	0.216718	0.0902196	0.0545245	0.0436606	0.255323	0.407929	0.041508	2.77982	1.59005	0.362684	1.93283	1.12387	0.293641	0.87111	0.476008	15.3587	1.85463	0.347308	0.181498	0.0889171	0.505756	0.228035	0.136649	3.65166	1.18688	0.323058	1.43682	1.12681	0.235956	2.98359
Solyc01g010070	0.0275		0	0	0	0.0275	0	0	0	0	0	0	0	0	0	0	0	0	0	0	0	0	0	0	0	0	0	0	0	0	0	0	0	0.025	0	0	0	0	0	0	0	0	0	0	0	0	0	0	0
Solyc01g010080	13.325	Expressed	0	0	0	0.0430116	0.0325	0.0361421	0	0	0	0	0.03	0.0225	0	0.0225	0	0	0	0	0.0462781	0.0234521	0.0984886	0.0825	0	0	0	0.03	0.025	0.0246221	0.0275	0	0.0275	0.025	0.0233333	0	0.0985309	0.229142	0.205482	0.100125	0.045	0.0402854	0.0462781	0.0531507	0.0554339	0.0404918	0.1025	0.03937	0.055
Solyc01g010090	0.21		0	0	0	0	0	0	0	0	0	0	0	0	0	0	0	0	0	0	0	0	0	0	0	0	0	0	0	0	0	0	0	0	0	0	0	0.0225	0	0	0	0	0	0	0	0	0	0	0
Solyc01g010100	0.1875		0	0	0	0	0	0	0	0	0	0	0	0	0	0	0	0	0	0.0275	0.0325	0	0	0	0	0	0	0	0	0	0	0	0	0	0	0	0.025	0.0225	0	0	0	0	0	0	0	0	0	0	0
Solyc01g010110	0.1025		0	0	0	0	0.0325	0.0325	0	0	0	0.025	0	0.025	0	0	0.0225	0	0	0	0	0	0	0	0	0	0	0	0	0	0	0.02	0	0.025	0	0	0	0	0	0	0	0	0	0.0348807	0.0592136	0	0.055	0	0
Solyc01g010120	0.025		0	0	0	0	0	0	0	0	0	0	0	0	0	0	0	0	0	0	0	0	0	0	0	0	0	0	0	0	0	0	0	0	0	0	0	0	0	0	0	0	0	0	0	0	0	0	0
Solyc01g010130	31.3167	Expressed	2.43395	1.39931	0.226826	0.63777	1.18915	0.219431	0.374622	0.600394	0.0754293	0.131933	0.713131	0.235903	0.280832	0.401712	0.360933	0.177735	6.05318	1.54822	1.06515	0.633369	0.796015	0.770703	0.278239	0.573038	0.70516	0.593133	0.659247	0.19046	0.281258	0.199013	0.0738241	0.407942	1.43595	0.13	0.478128	0.545084	0.749048	0.610212	0.292033	0.399132	0.27369	0.328871	0.380468	0.610253	0.535185	0.164671	0.512461
Solyc01g010140	1.805	Expressed	0	0	0	0	0	0	0	0	0	0	0	0	0	0	0	0	0	0	0.025	0.0275	0	0	0	0	0	0	0	0	0	0	0	0	0	0	0.0582201	0.157975	0	0	0	0	0	0	0	0	0	0	0
Solyc01g010150	20.7033	Expressed	8.34835	0.0919239	0.0810735	0.175333	0.165548	0.274105	0.279266	0.287576	0.666546	0.631141	0.32474	0.34506	0.313714	0.356008	0.32174	0.599783	2.45696	0.214413	0.132445	0.191028	0.0779289	0.158167	0.305519	0.422384	0.303837	0.630177	0.525397	1.18078	0.67638	0.928371	0.858749	1.28009	1.89739	1.1212	0.0852814	0.327961	1.15982	0.593722	0.269227	0.281614	0.347308	0.609296	0.451246	0.374589	0.626144	0.292475	1.05321
Solyc01g010160	20.7	Expressed	0	0	0	0	0	0	0	0	0.0492443	0.0895707	0.116118	0.207465	0.454908	0.53021	0.348482	0.192289	0	0	0	0	0	0	0	0	0.0306526	0.149611	0.0904963	1.39458	1.48061	0.979765	0.790173	2.80508	0	0	0	0	0	0	0	0	0.236784	0.343256	0.317359	0.397429	0.175831	0.571903	0.503941
Solyc01g010170	26.3275	Expressed	0	0	0	0	0	0	0	0	0.0272336	0.0895707	0.0453459	0.492889	0.654082	0.185039	0.200141	0.451763	0	0	0	0	0	0.03	0	0	0.0662067	0.134498	0.364174	1.3543	1.44151	0.77493	1.76228	1.49752	0	0	0	0	0	0	0	0.0325	0.179281	0.193412	0.252075	0.135062	0.57173	0.2604	0.2763
Solyc01g010180	880.25	Expressed	1.74319	2.01979	3.74211	3.24554	2.19301	8.23375	5.65852	5.49816	11.2575	2.01779	3.50803	1.00165	0.717368	1.40897	0.942111	0.522446	0.699937	0.866529	0.730324	2.89874	0.742614	1.75243	0.216756	0.431304	0.479103	0.310359	0.618782	1.17913	0.549521	0.568424	0.475979	0.270104	4.64692	6.30853	2.46707	0.942571	1.1066	0.220151	0.120303	0.271692	0.195576	0.180757	0.204017	0.164082	0.246205	0.24274	0.666896
Solyc01g010190	113.067	Expressed	1.32666	1.81287	2.01352	1.2166	2.21087	1.90135	1.44625	1.37535	3.28433	1.70699	2.36654	2.4296	3.24064	1.44964	2.84917	1.8307	3.79842	3.81305	1.94346	2.95527	0.687342	1.18214	1.08283	1.10694	1.28276	1.07752	2.14747	1.84026	2.18724	1.2585	1.98134	3.61745	6.3219	0.770375	0.703045	1.10424	1.04061	0.889349	1.60216	0.930027	1.13245	1.47073	2.94974	1.31744	2.24657	0.442766	0.852623
Solyc01g010200	1775.95	Expressed	88.8968	12.6084	13.135	9.07048	21.7441	12.6833	20.5004	16.4652	39.5193	22.6598	34.8655	11.2935	17.2915	9.902	6.78807	7.14192	154.057	12.1893	7.63312	21.0296	18.8139	27.2767	19.8349	37.2315	31.0755	28.8593	37.2966	14.0417	8.76096	8.68052	3.80756	11.0767	24.4653	3.75922	7.62188	9.7593	4.99413	13.7879	4.37899	10.4679	4.94172	8.61163	19.2313	2.39955	7.67551	2.53969	11.0887
Solyc01g010210	0.245		0	0	0.025	0	0.0325	0	0	0	0	0	0	0	0	0	0	0.03	0	0.0241523	0.0303795	0	0	0	0	0	0	0.025	0	0	0	0.025	0.0275	0.0125	0	0	0	0.0225	0.0325	0.02	0	0	0	0.0275	0.025	0	0.0275	0	0
Solyc01g010220	44.0575	Expressed	0.887938	1.52972	0.503064	0.438641	0.606814	0.710861	0.917073	1.15495	1.45928	0.637946	0.628853	0.360933	0.981719	0.234321	0.858273	0.531421	1.68333	2.3178	0.699196	1.07495	1.30871	0.780326	0.456241	0.813781	0.663394	0.482381	0.556365	0.410802	0.730987	0.511126	0.076635	0.355302	0.284156	0.549495	0.548582	0.640989	1.29928	0.547342	0.430433	0.451154	0.23562	0.240117	0.280992	0.417592	0.124925	0.252731	0.0773924
Solyc01g010230	218.53	Expressed	3.45961	4.50707	4.23431	5.22203	5.8089	6.19178	8.72838	1.997	11.771	1.98913	5.91174	2.13689	6.15608	5.67389	2.29613	1.68785	6.08895	4.91738	3.36975	2.86146	4.45305	8.30498	3.1168	6.07138	3.27366	5.75231	4.99533	6.29451	5.43007	2.58768	3.37932	10.1447	0.676075	0.15592	1.75599	4.11114	0.957726	1.01698	2.52875	2.98131	1.23289	1.91618	0.566971	3.12225	2.08773	1.90724	3.39558
Solyc01g010240	0.04		0.04	0	0	0	0	0	0	0	0	0	0	0	0	0	0	0	0	0	0	0	0	0	0	0	0	0	0	0	0	0	0	0	0	0	0	0	0	0	0	0	0	0	0	0	0	0	0
Solyc01g010250	104.69	Expressed	1.67174	0.549257	0.565573	0.143781	0.329355	0.718401	0.725592	0.263881	3.57541	4.02632	2.99114	0.825999	1.65625	0.608783	0.34529	1.13086	23.2442	0.414015	0.125067	0.467286	0.452815	0.446568	1.48908	0.686792	2.00801	3.80131	3.37667	1.17122	1.40425	1.51688	2.28086	1.09641	1.89088	1.28282	0.715978	0.447388	1.29474	1.09138	1.08583	1.31381	3.03305	6.36125	4.53418	3.64957	1.35583	1.91332	0.106878
Solyc01g010260	12.3733	Expressed	0.768635	0.0680686	0.025	0.0454606	0.127304	0.1275	0.11098	0.066128	0.0442295	0.14838	0.141326	0.0225	0.0259808	0.045	0.034641	0.0273861	1.52257	0.0348807	0.0275	0.05	0.025	0	0.0377216	0.0601907	0.035	0.015	0.02	0.02	0	0	0	0.065	3.32233	0.0927961	0.0175	0.0442295	0	0.0495606	0.0225	0.0402854	0	0	0.0592136	0.065	0.119234	0	0.02
Solyc01g010270	627.85	Expressed	11.2911	11.492	11.3687	3.83278	7.03996	15.5555	9.11517	9.40187	23.2715	14.0519	16.6899	5.15056	1.69253	3.09181	4.40089	1.44505	15.8691	22.7221	9.90808	7.31147	4.81606	22.6256	11.7464	17.1826	8.6913	5.75336	9.30263	3.38068	5.80467	3.79464	6.31091	6.06856	12.8678	4.26484	5.4554	2.72658	8.15187	3.77641	1.81207	4.67798	1.60663	1.8425	1.55088	2.55826	1.99751	1.26871	2.33903
Solyc01g010280	0.523333		0.03	0.0246221	0.0485412	0.0370529	0	0	0	0	0.0275	0	0	0	0	0	0	0	0	0.0581664	0.0275	0.0288675	0.025	0	0.0325	0	0	0.015	0	0.02	0.0340343	0	0	0	0.198018	0.0666667	0.0897566	0.0291548	0.0361421	0.0262996	0	0	0	0	0	0	0	0	0.025
Solyc01g010290	53.3775	Expressed	1.22741	1.30002	0.948766	1.75565	0.957675	1.34394	0.505709	1.18593	0.883585	0.163018	0.795377	0.293864	1.34472	0.894766	0.250383	0.662156	10.5779	1.06709	1.53935	0.978822	0.983069	0.432731	0.396219	0.596126	1.38683	1.06325	0.650647	0.854722	1.17128	1.12611	0.708672	0.434653	5.81241	0.732765	0.37825	1.25738	0.968164	1.92037	0.521191	0.910836	1.47362	0.757808	1.38869	0.557001	1.0143	1.19905	0.535543
Solyc01g010300	38.44	Expressed	0	0.0225	0	0	0	0	0	0	0	0	0	0	0	0	0	0	0	0.1225	0	0	0	0	0	0	0	0	0	0	0	0	0	0	0.0233333	0	0	0	0	0	0	0	0	0	0	0	0	0	0
Solyc01g010310	145.85	Expressed	1.27319	4.78373	4.85509	1.31562	2.43622	0.941925	2.17894	2.05229	1.25002	0.789778	0.968788	0.703969	0.593675	0.473471	0.367817	0.127696	7.067	7.3533	8.62184	2.04704	2.43363	2.18261	0.796402	1.20907	0.966601	0.971926	0.408463	0.873254	0.39603	0.188105	0.206453	0.141149	0.223408	2.20939	5.74713	2.59026	2.72941	0.575369	1.43534	0.383373	0.0792149	0.356055	0.557784	0.0803119	0.180064	0.146202	0.0894893
Solyc01g010320	0.0325		0	0	0.03	0.0275	0	0	0	0	0	0	0	0	0	0	0	0	0	0	0	0	0	0	0	0	0	0	0	0	0	0	0	0	0	0	0	0	0	0	0	0	0	0.025	0	0	0	0	0
Solyc01g010330	0.133333		0.0811035	0	0	0	0	0	0	0	0	0	0	0	0	0	0	0	0.0606447	0	0	0	0	0	0	0	0	0	0	0	0	0	0	0	0	0	0	0	0	0	0	0	0	0	0	0	0	0	0
Solyc01g010340	0.355		0.0664162	0.0280995	0.0730725	0.0275	0.0325	0	0	0.0275	0.0291548	0.0325	0.045	0.0225	0.0291548	0.0280995	0	0.03	0.043589	0.0837033	0.0576447	0.0234521	0	0	0.0390246	0	0	0	0	0.02	0	0	0.03	0.0619644	0	0	0.0386221	0.045	0	0	0	0	0	0.111533	0.03	0.0225	0.065	0.0234521	0.0433013
Solyc01g010350	7.75333	Expressed	0	0	0.025	0.0978413	0.0625	0.0225	0.0583809	0.0872258	0	0.0325	0.03	0	0	0	0	0	0	0	0.0348807	0.1875	0.043589	0	0.0325	0.035	0	0	0	0	0	0	0	0	0	0	0.0309233	0.170508	0.0325	0	0	0.0280995	0	0	0	0	0	0	0
Solyc01g010360	10.4833	Expressed	0.19342	0	0	0.472282	0.157023	0.203756	0.228345	0.369783	0.189055	0.127279	0.142207	0.0827144	0.0635741	0.117225	0.125599	0.0721543	2.925	0	0	0.0881641	0.253126	0.15348	0.135984	0.0796346	0.066458	0.160753	0.063901	0.0834041	0.17466	0.073598	0.0931397	0	0	0	0.05	0.0942846	0.189868	0.164595	0.16914	0.12559	0.0782091	0.0535413	0.0409013	0.1075	0.0404145	0.0376386	0.0175
Solyc01g010370	29.7667	Expressed	2.05056	1.51887	0.399132	0.124591	0.384521	0.591993	0.794569	0.588565	0.24486	0.43431	0.407819	0.254603	0.27097	0.133627	0.207138	0.0852447	5.49781	1.64603	0.37453	0.77915	0.523967	0.599644	0.499283	0.33582	0.453542	0.264008	0.149798	0.0708872	0.164943	0.207786	0.213815	0.225254	1.00844	3.42276	0.412763	0.397332	0.283942	0.269548	0.202855	0.41139	0.0363719	0.151788	0.179304	0.0825	0.0425	0.065622	0.0997497
Solyc01g010380	0.03		0	0	0	0	0	0	0	0	0	0	0	0	0	0	0	0	0	0	0	0	0	0	0	0	0	0	0	0.02	0	0	0	0	0	0	0	0	0	0	0	0	0	0	0	0	0	0	0
Solyc01g010390	280.747	Expressed	2.36897	0.743106	0.884397	0.664397	0.39303	0.46551	0.423369	0.749561	0.264429	0.49344	0.371068	0.210847	0.234605	0.347236	0.125532	0.151135	6.28396	0.403619	0.986174	2.39531	1.01873	0.603771	0.782091	0.515501	0.21727	0.123314	0.158351	0.240741	0.0641613	0.315869	0.111093	0.201742	0.105357	0.813989	3.70542	1.79226	1.34555	0.790485	1.33341	1.35103	0.546778	1.28897	0.295874	0.21099	0.186927	0.220114	0.109192
Solyc01g010400	0.03		0	0	0	0	0	0	0	0	0	0	0	0	0	0	0	0	0	0	0	0	0	0	0	0	0	0	0	0	0	0	0	0	0	0	0	0	0	0	0	0	0	0	0	0	0	0	0
Solyc01g010410	19.3567	Expressed	0.643359	0.0272336	0.0694622	0.127574	0.258695	0.270077	0.363547	0.172838	0.830245	0.560981	0.491342	0.615919	0.351624	0.225481	0.598308	0.129124	0.643981	0.0483692	0.171725	0.339052	0.293211	0.267036	1.36468	0.399612	1.12145	0.988268	0.402459	0.288401	0.478128	0.203034	0.349261	0.290775	0.209868	0.0793725	0.19929	0.268371	0.498673	0.50901	1.02221	0.271416	0.683244	0.278418	0.607529	0.552198	0.266376	0.188519	0.348628
Solyc01g010420	2.28	Expressed	0	0	0	0.0225	0.0325	0.0561249	0	0	0.0892912	0.0535996	0.0779423	0.0908295	0.177482	0.0618466	0.109801	0.0566238	0	0	0	0.0830161	0.025	0.0552834	0.0275	0.0337577	0.025	0.0264575	0	0.10504	0.115	0.182043	0.0317543	0.0355903	0	0	0.0544671	0.0442295	0.0623665	0.104443	0.0846931	0.0217466	0.0265754	0.0275	0.0510514	0.02	0.065	0	0.0175
Solyc01g010430	140.333	Expressed	4.16525	0.45331	1.11866	0.578941	0.934838	0.7784	3.049	0.332751	3.24495	3.7415	0.579114	0.404009	0.659398	1.42571	1.04586	2.07524	3.77504	1.02744	0.774693	0.376992	1.36911	1.84682	0.902492	0.698873	3.96482	0.719854	0.340597	1.07292	1.16226	1.38229	2.20537	1.68794	2.57832	0.632464	1.4626	2.0558	1.2058	1.30497	1.01096	2.05776	1.26857	1.28537	1.59327	0.477064	0.763954	0.156125	0.537378
Solyc01g010440	380.515	Expressed	39.2269	2.99559	2.8121	3.95259	3.72062	2.50174	2.17403	1.60409	4.64702	1.91019	1.11877	1.81585	3.79654	0.710364	2.27201	4.17843	13.1441	2.6474	0.63035	4.57982	3.66165	2.90849	4.27832	0.886561	5.29488	2.54299	1.70447	1.58548	3.42733	1.50146	2.29192	4.54411	28.8862	3.74208	3.68729	3.44909	3.02677	4.26568	1.57736	4.8663	2.37959	4.3782	3.05263	4.0221	3.31789	3.67473	1.04565
Solyc01g010450	0.045		0	0	0	0	0	0	0	0	0	0	0	0	0	0	0	0	0	0	0	0	0	0	0	0	0	0	0	0	0	0	0	0	0	0	0	0	0	0	0	0	0	0	0	0	0	0	0
Solyc01g010460	7.4	Expressed	0	0.516833	0.281021	0.340942	0.337417	0.550838	0.36438	0.240429	0.468497	0.237184	0.586544	0.344997	0.277079	0.253328	0.235814	0.160799	0.0333333	0.304713	0.313913	0.517999	0.474541	0.365399	0.416283	0.293268	0.905275	0.581397	0.510433	0.216809	0.754568	0.166752	0.149185	0.503008	0.0233333	0.0366667	0.436291	0.940349	0.291501	0.239213	0.310494	0.143258	0.366887	0.259017	0.2866	0.203531	0.252004	0.213873	0.168937
Solyc01g010470	36.8733	Expressed	4.40741	0.324124	0.23368	0.355747	0.240533	0.373171	0.298524	0.310564	0.423045	0.558771	0.454485	0.358492	0.374775	0.236973	0.336362	0.40613	4.29446	0.270967	0.212171	0.535304	0.392903	0.341528	0.637979	0.447819	0.255518	0.185399	0.379001	0.280788	0.337525	0.180572	0.4463	0.62526	10.6487	2.06555	0.680813	0.324175	0.254558	0.350559	0.300371	0.238013	0.0904157	0.25446	0.311033	0.173751	0.354213	0.109268	0.3324
Solyc01g010480	312.937	Expressed	1.88809	0.0492231	0.123988	1.93651	1.98471	5.47554	9.89602	7.01153	12.7015	7.18632	13.1939	4.38451	4.86099	4.36645	3.28251	2.14439	10.6809	0.132877	0.0606046	1.20566	2.17728	2.9836	2.38614	3.94732	9.02712	6.77659	6.40175	2.77418	1.15224	3.06923	2.40845	1.09389	0.498308	0.160451	0.293864	1.00207	3.7955	2.83909	2.17792	0.612937	1.05277	2.63314	2.18192	0.590551	0.446288	1.20691	0.315397
Solyc01g010490	56.3875	Expressed	0	0.0246221	0	0.0775	0.332966	0.342184	0.607541	0.529339	2.8304	2.77426	4.8516	1.77765	2.66456	0.523776	1.03165	0.764247	0	0.0275	0.025	0.159426	0.418051	0.299621	0.175167	0.589242	5.64879	3.99604	7.85511	1.09264	1.68244	2.28643	3.14903	1.10562	0.14	0	0.151623	0.445991	0.920552	1.811	2.16326	1.66511	1.6142	2.72661	2.37491	1.67623	1.9048	2.20406	2.48728
Solyc01g010500	0.0325		0	0	0	0.025	0.025	0	0.0225	0	0	0	0	0	0	0	0	0	0	0	0.0275	0	0	0	0	0	0	0	0	0	0	0	0	0	0	0	0	0	0.0325	0	0	0	0	0	0	0	0	0	0
Solyc01g010510	2.855	Expressed	0.133167	0.479624	0.358571	0.241954	0.332049	0.160332	0.19395	0.134187	0.115938	0.221674	0.0947804	0.299736	0.181768	0.181521	0.213673	0.159393	1.71934	0.190586	0.230163	0.163223	0.0411045	0.280758	0.139374	0.278224	0.436711	0.191355	0.211596	0.181768	0.265738	0.0858293	0.143672	0.223663	0.692917	0.462397	0.363261	0.211029	0.329469	0.16505	0.13567	0.0745403	0.162429	0.200395	0.133502	0.1375	0.267613	0.137265	0.137901
Solyc01g010520	54.17	Expressed	9.28725	0.994183	0.538586	0.645334	0.0994569	0.238201	0.803606	0.75491	1.25051	0.495723	0.583052	0.278399	0.341797	0.172645	0.0580768	0.0470815	11.6965	1.8252	1.52507	1.05959	0.495805	0.620824	0.635721	0.939508	0.917247	0.574781	0.708714	0.103793	0.0911386	0.0977241	0.0848528	0.0514782	2.86185	0.0617342	0.79805	0.629001	0.553013	0.307256	0.224699	0.302169	0.121201	0.230954	0.190197	0.0272336	0.0334166	0.0481966	0.0361421
Solyc01g010530	0.0625		0	0	0	0	0	0	0	0	0	0	0	0	0	0	0	0	0	0	0	0	0	0	0	0	0	0	0	0	0	0	0	0	0	0	0.025	0	0	0	0	0.0225	0	0	0	0	0	0	0
Solyc01g010540	705.99	Expressed	19.7437	2.21659	7.10396	10.3632	1.66055	4.38941	5.71777	6.85398	5.30206	4.11368	6.95474	1.76387	17.067	3.93844	3.67278	3.86249	18.5038	37.7306	16.5912	25.3673	8.34254	6.41257	20.1753	8.68507	7.06787	4.3316	5.13936	4.16488	3.20807	1.71214	4.63167	7.23974	9.73336	48.2296	12.1686	11.7535	14.0799	11.2745	6.69402	7.99639	2.71238	7.02032	5.73414	8.28449	3.28891	5.60257	5.17288
Solyc01g010550	0.0733333		0	0	0	0	0	0	0	0	0	0	0	0	0	0	0	0	0	0	0	0	0	0	0	0	0	0	0	0	0	0	0	0	0	0	0	0	0	0	0	0	0	0	0	0	0	0	0
Solyc01g010570	140.33	Expressed	10.0881	1.39052	0.550944	3.74757	1.23125	2.5897	2.76444	0.828074	1.73722	1.83536	1.06214	0.556962	2.8574	1.67989	1.90277	0.897519	9.88162	1.64063	0.646818	1.12246	1.21154	1.06225	0.370414	1.7272	2.8067	0.913376	1.10593	1.96469	1.44823	1.26742	1.57709	1.43964	3.32775	1.78247	0.553901	0.797563	1.26338	2.96948	1.25035	1.01194	0.744541	1.21879	1.87787	2.13697	1.73844	1.08463	2.14014
Solyc01g010580	977.89	Expressed	60.9138	5.11617	7.29281	11.2709	7.4952	18.6447	12.881	10.9377	7.54703	11.6678	13.0847	5.95927	20.6526	5.82955	9.07202	7.8021	56.8285	35.0884	20.7736	39.1928	23.2977	25.8601	36.9201	7.72925	14.7766	11.4217	17.3337	5.13089	8.45402	2.9555	6.46495	7.39313	54.4334	162.742	21.5439	19.3746	15.4018	20.7019	8.96143	16.6948	4.69554	11.1336	7.92849	10.9242	6.89307	8.31204	8.53702
Solyc01g010590	44.82	Expressed	2.83005	1.37154	1.26127	0.579353	1.65268	2.14323	1.98494	0.920444	2.38643	1.25046	1.75131	0.674525	0.909051	0.138887	0.634422	0.28185	4.0457	0.677512	0.220657	1.04719	0.807125	2.42379	1.26395	1.06397	0.824342	2.2963	2.01139	1.16412	1.08667	0.715336	0.488586	1.93516	5.4746	1.36226	0.730666	1.28576	0.622446	1.13354	2.02074	0.219369	0.836884	1.13932	0.978948	1.28223	0.852617	0.92715	0.870847
Solyc01g010600	35.1333	Expressed	6.59817	0.090312	0.025	0.0525	0.0275	0.0225	0.0225	0	0	0	0	0	0	0	0	0	1.09515	0.0733712	0	0	0	0	0	0	0	0	0	0	0	0	0	0	0.185023	0	0	0.0275	0	0	0	0	0	0	0	0	0	0	0
Solyc01g010610	4.1225	Expressed	0	0.0324037	0.0689656	0.152062	0.498688	0.592424	0.857195	0.481162	0.464621	1.5423	1.1826	0.473592	0.528778	0.622073	0.0843974	0.0614241	0	0.177969	0.169331	0.382078	0.252091	0.317096	0.277579	0.594157	0.180808	0.565529	0.378844	0.239944	0.169386	0.425029	0.111831	0.333401	0	0	0.0825	0.253225	0.263011	0.442672	0.248172	0.48357	0.10681	0.147895	0.156278	0.0665207	0.0646787	0.15384	0.0929606
Solyc01g010630	1.06	Expressed	0	0.02	0.025	0.0253311	0	0.03	0.0477842	0.0510514	0.0568624	0.10858	0.0783555	0.0234521	0.0225	0.0534439	0.0535996	0.0880696	0	0	0	0.0675771	0.0525	0.0574456	0.0332603	0	0.035	0.0495606	0	0.023094	0.02	0.0425	0.0504975	0.0473242	0.0566667	0	0	0.0332603	0	0	0.0790042	0	0.0253311	0.15843	0.0492231	0.0870225	0.0455293	0.132059	0.0440643
Solyc01g010640	268.29	Expressed	4.98171	0.397416	0.789573	0.70423	0.423104	0.920883	1.00007	0.408626	2.02711	2.32005	0.976682	1.16712	2.21673	1.81858	4.02989	3.42183	1.62748	0.537329	0.687283	0.650927	0.617232	0.672216	0.616811	0.804294	1.36099	2.29636	1.37003	5.07682	3.87895	1.80271	7.21141	2.77202	5.04197	0.741448	1.31653	1.17317	0.426781	0.964905	0.933179	1.5548	1.37805	1.57039	0.20168	1.95619	1.54091	2.74257	3.78724
Solyc01g010650	330.347	Expressed	43.6805	1.31274	1.15518	3.16622	2.33152	1.58974	2.94642	2.05092	1.86156	1.09089	1.83012	2.108	2.08849	2.10845	2.66133	2.44403	35.2091	1.65251	1.39322	2.65707	2.30312	2.64578	1.45316	3.76585	3.73799	4.01504	2.70122	4.13054	3.025	2.02901	1.37692	0.600243	11.8677	5.08567	1.01303	1.96832	0.940384	1.01315	2.99875	2.66622	1.58425	3.58875	1.26144	2.39588	1.62014	2.26362	1.99075
Solyc01g010660	44.52	Expressed	1.62927	0.781883	1.08985	0.640456	1.27657	1.38288	0.378352	0.813095	1.36745	0.370661	0.673119	1.27298	0.450451	0.243392	0.91366	1.0932	1.05382	0.104672	1.03989	0.317201	0.811285	1.24854	0.972338	0.734443	1.40047	0.333701	1.02792	0.576021	0.451193	0.867684	0.370158	1.2802	0.891148	0.653971	0.120692	0.119469	0.343171	0.807646	0.400362	0.262107	0.657323	0.582686	0.546403	0.729308	1.19747	0.41736	0.514085
Solyc01g010670	0.0225		0	0	0	0	0	0	0	0	0	0	0	0	0	0	0	0	0	0	0	0	0	0	0	0	0	0	0	0	0	0	0	0	0	0	0	0	0	0	0	0	0	0	0	0	0	0	0
Solyc01g010680	0.0433333		0	0	0	0	0	0	0	0	0	0	0	0	0.03	0	0	0	0	0	0	0	0	0	0	0	0	0	0	0	0	0	0	0	0.0233333	0	0	0	0	0	0	0	0	0	0	0	0	0	0
Solyc01g010690	0.11		0	0	0	0	0	0	0	0	0	0	0	0	0	0	0	0	0	0	0	0	0	0	0	0	0	0	0	0	0	0	0	0	0	0	0	0	0	0	0	0	0	0	0	0	0	0	0
Solyc01g010700	294.983	Expressed	0.81304	0.520423	1.64608	0.952427	0.667214	1.06399	0.884788	0.398476	1.47954	1.39086	1.49935	0.736245	1.84485	0.256775	0.638454	0.665388	2.26352	0.888739	1.54944	0.984094	0.582285	1.67055	0.904581	0.771129	1.92553	1.64474	2.45339	0.86278	0.70863	0.613764	0.172934	0.964774	7.3115	3.34965	1.13503	1.2655	0.803036	1.20893	1.68058	1.22075	0.990744	1.07675	0.509548	0.786638	1.13429	1.47207	0.735011
Solyc01g010710	42.82	Expressed	0.161967	0.234982	0.189429	0.247857	0.512787	0.707253	0.527968	0.384737	0.161323	0.131751	0.217025	0.0812788	0.0622328	0.0765261	0.0309233	0.0309233	0	0.435074	0.29662	0.253689	0.22228	0.35441	0.34519	0.467377	0.110227	0.103401	0.140297	0.0225	0.02	0	0.0275	0	0	0.289847	0.104592	0.144532	0.14148	0.14109	0.186994	0.238934	0.0497494	0.0872735	0.0430842	0.02	0.0366003	0.0225	0.0175
Solyc01g010720	0.06		0	0	0.0225	0.0275	0	0	0	0	0.0275	0	0	0	0	0	0	0	0	0	0	0	0	0	0.0325	0.03	0	0	0	0	0	0	0	0	0	0	0	0	0	0.025	0	0	0	0	0	0.0225	0	0	0.02
Solyc01g010730	0.02		0	0	0	0	0	0	0	0	0	0	0	0	0	0	0	0	0	0	0	0	0	0	0	0	0	0	0	0	0	0	0	0	0	0	0	0	0	0	0	0	0	0	0	0	0	0	0
Solyc01g010740	0.0825		0	0.0325	0	0	0	0	0	0	0	0.025	0	0	0	0	0.0225	0.03	0	0	0	0.0275	0	0	0	0	0.0325	0.0320156	0	0	0	0	0	0.0125	0	0	0	0	0	0	0	0.0458939	0	0	0	0	0	0	0
Solyc01g010750	879.987	Expressed	46.0718	14.5296	28.4916	8.5273	20.461	14.9508	9.45146	22.2701	16.5971	10.5634	15.4654	34.9492	17.0965	16.793	29.5986	8.88282	61.3412	8.15612	28.9165	20.9896	17.0955	28.8672	16.5586	27.9949	18.2915	18.2024	9.45289	7.21448	31.3671	16.7214	12.3072	23.4912	103.926	7.7485	12.8789	15.9447	5.22833	23.7176	7.38473	6.5509	20.0387	23.627	14.3228	6.80013	35.9555	20.6591	18.2705
Solyc01g010760	391.653	Expressed	3.98578	9.62979	1.77197	4.37449	0.936673	2.45796	2.52286	2.38558	5.61799	5.30807	1.64304	5.51562	19.3052	5.58414	5.04303	4.46918	22.118	8.16168	5.83827	1.78777	2.96792	3.88853	4.6546	1.36287	4.5972	3.89487	5.33236	5.63061	3.70722	6.03164	14.2036	13.4012	10.4495	24.2393	2.55699	1.41275	3.68015	2.51942	5.52599	1.05443	1.21784	4.28559	6.1516	6.29683	6.63829	9.81731	10.1796
Solyc01g010770	26.0375	Expressed	0.935492	0.119678	0.0611521	1.18562	1.20595	1.00976	0.717391	0.808934	1.05347	0.927168	0.771215	0.168542	0.347044	0.147047	0.223658	0.304148	3.07302	0.379942	0.133065	0.537671	1.12105	2.24517	1.07929	0.189577	2.68289	1.57441	0.562954	0.62478	0.231679	0.165957	0.4275	0.15025	6.49003	4.2967	0.0801431	0.667275	2.35657	0.619038	0.836933	1.2189	1.09832	0.490822	0.592326	0.553856	0.324384	0.760734	0.347716
Solyc01g010780	82.59	Expressed	12.8234	1.49036	3.2848	1.55577	2.2144	2.04383	1.04992	0.589081	1.72974	1.29629	1.07592	1.77356	0.491605	2.15476	2.33607	1.18441	4.39006	2.68367	4.2668	1.71652	1.75965	1.20964	1.94464	2.77947	1.05652	1.01522	2.1235	1.40762	1.04041	0.57861	1.94308	1.2498	17.085	3.34306	1.20163	2.2635	2.85579	0.643589	2.47936	1.66181	1.56914	1.61724	0.870412	2.48226	2.07718	2.35716	1.61969
Solyc01g010790	0.0425		0	0	0	0	0	0	0	0	0	0	0	0	0	0	0	0	0	0	0	0	0	0	0	0	0	0	0	0.0225	0	0	0	0	0	0	0	0	0	0	0	0	0	0	0	0.0425	0	0	0
Solyc01g010800	1.395	Expressed	0	0.0915947	0.200707	0.247218	0.155744	0.0491596	0.120312	0.108349	0.0962635	0.00866025	0.0723994	0.0429146	0.108628	0.0618466	0.0615596	0.0555278	0.0333333	0.183007	0.070297	0.103602	0.100364	0.0601387	0.112796	0.102754	0.108195	0.0762124	0.0561805	0.0402078	0.0471478	0.117358	0.0343996	0.0502286	0.0233333	0	0.107121	0.0507445	0.0769199	0.0530723	0.155885	0.191202	0.0673919	0.0889171	0.113652	0.169085	0.211162	0.0969858	0.0302765
Solyc01g010810	51.82	Expressed	2.01135	0.608802	0.667888	0.86279	0.662752	0.64333	0.6139	1.02255	0.757555	1.07644	0.627035	0.69734	1.10178	1.02439	0.912263	1.35479	3.9787	0.402999	2.2332	0.716547	0.581055	0.568615	0.528368	0.568527	1.28445	0.806334	1.43362	0.275469	0.889123	0.411187	0.755771	0.18163	5.02033	1.66711	0.398819	0.863332	0.959674	0.6661	0.383544	0.474173	0.793614	0.922672	0.401671	0.918881	0.306496	0.749081	0.60669
Solyc01g010820	44.5475	Expressed	0.337161	0.985685	1.01275	0.93941	1.78413	2.75037	0.995083	1.58535	1.00094	2.8082	1.89531	0.419335	1.52644	2.43509	2.50052	0.724925	1.48541	1.17815	1.63158	1.79405	1.87231	1.44491	1.376	0.878791	1.15665	2.08585	0.556093	1.01177	1.98055	1.02782	0.811145	1.29222	0.684398	0.447561	1.97531	1.48024	3.17821	1.78336	1.106	1.63382	0.771215	1.18289	0.442116	1.43122	1.35334	0.217888	1.45488
Solyc01g010830	54.55	Expressed	4.87596	1.80141	1.21627	1.14002	1.42248	0.79333	1.40865	0.342904	0.710286	2.57684	1.29574	0.771323	1.63703	1.69365	2.3087	0.672756	6.84016	1.14618	0.906389	0.562915	1.19993	0.767923	0.578682	0.867223	1.31587	1.81827	1.56631	1.13415	1.74391	1.0902	0.890069	2.20252	15.3182	1.95525	0.749633	0.252636	0.634173	0.634788	1.19664	0.808263	0.982144	0.713552	0.893406	0.687512	1.757	1.63353	0.87762
Solyc01g010840	0.1525		0	0	0	0.025	0	0	0	0	0	0	0	0	0	0	0	0	0	0.0246221	0	0	0	0	0	0	0	0	0	0	0	0	0	0	0	0	0	0	0	0	0	0	0	0	0	0	0	0	0
Solyc01g010850	0.0225		0	0	0	0	0	0	0	0	0	0	0	0	0	0	0	0	0	0	0	0	0	0	0	0	0	0	0	0	0	0	0	0	0	0	0	0	0	0	0	0	0	0	0	0	0	0	0
Solyc01g010860	41.42	Expressed	3.7136	0.611099	0.773783	0.326879	1.18714	1.44546	0.936682	0.778314	0.53506	0.30087	1.14672	0.511686	2.04891	0.874424	1.31206	0.462547	6.36869	0.218761	0.784478	1.47941	0.68038	1.3414	0.870622	0.557829	0.271708	1.01005	0.413471	0.524522	1.569	0.406971	0.512337	1.43528	2.65516	1.37264	0.719541	1.03465	1.0205	0.775462	0.29303	1.18264	1.0754	0.695837	0.343814	0.863332	1.11188	0.739533	0.718104
Solyc01g010870	271.205	Expressed	3.22527	2.72839	2.42242	1.60021	0.330035	2.93414	2.64982	1.49182	8.23207	16.289	16.9803	6.02657	10.778	6.76344	5.21038	2.98953	1.49279	1.59223	1.80173	3.07327	1.81474	2.12046	2.18089	1.48871	17.0126	20.1772	24.1609	3.85647	10.2105	2.46597	4.25734	7.30116	1.73977	0.253574	1.58264	4.05192	2.11754	5.43547	4.07155	6.46665	2.74347	3.60767	4.68846	6.22788	5.97521	4.55872	1.12121
Solyc01g010880	13.3275	Expressed	0.47697	0.657939	0.377911	0.873432	0.753055	0.289896	0.327312	0.484069	0.655355	0.396261	0.40835	0.483055	0.784612	0.502848	0.26966	0.557689	0.131698	0.287547	0.629577	0.831168	0.114918	0.510114	0.488629	0.879612	0.900653	0.58767	0.35652	0.500158	0.597781	0.525236	0.49827	0.158975	0.787803	0.165059	0.241402	0.341309	0.603469	0.595413	0.722623	0.38679	0.770633	0.176777	0.274693	0.735011	0.448572	0.394892	0.130982
Solyc01g010890	0.246667		0	0.0259808	0	0	0	0	0	0	0	0	0	0	0	0	0	0.03	0	0.0291548	0	0	0	0	0	0	0	0	0	0	0	0	0	0	0	0	0	0	0	0	0	0	0	0	0	0	0	0	0
Solyc01g010900	0.0333333		0	0	0	0	0	0	0	0	0	0	0	0	0	0	0	0	0.0333333	0	0	0	0	0	0	0	0	0	0	0	0	0	0	0	0	0	0	0	0	0	0	0	0	0	0	0	0	0	0
Solyc01g010910	0.2925		0	0.04	0.025	0	0	0	0	0	0	0	0	0	0	0	0	0	0.03	0.0635577	0	0	0	0	0	0	0	0	0	0	0	0	0	0	0	0	0	0	0	0	0	0	0	0	0	0	0	0	0
Solyc01g010920	14.3967	Expressed	1.01844	0.104003	0.166658	0.385624	0.0800521	0.14623	0.207726	0.15559	0.159948	0.155154	0.11905	0.107189	0.141855	0.105702	0.129767	0.0781425	7.48966	0.524982	0.175042	0.253985	0.142624	0.233359	0.344731	0.0972433	0.0723418	0.103078	0.156917	0.0210159	0.0471478	0.129832	0.0708725	0.0878801	0.374715	1.01208	0.224277	0.128095	0.104483	0.217653	0.146913	0.140653	0.125466	0.083865	0.06408	0.0913213	0.120649	0.0302765	0.0295804
[truncated: 33,250 more rows]
[truncated: 86 more columns]
